# Supplementary material for: Dual blockade of IL-10 and PD-1 leads to control of SIV viral rebound following analytical treatment interruption.
Source: Research Square preprint supplement (doi:10.21203/rs.3.rs-3175716/v1), 2023-08-14
Supplement: Supplementary file 1 [file 3df3b43fe9bc5494e1a12511.xlsx]

## Sheet: CD4_data
	SampleID	louvain	absolute_counts	relative_frequency	mean_pseudotime	median_pseudotime	sd	name	filename	Sample_name	group	Animal	Week Post-TX	week.tx	stim	well_confirm
1	Sample_1	1	175	0.137363	4.38602	4.51914	1.86405	Sample_1	AI_export_Plate 1 UNS LN_A1_A01_CD4p_Live.fcs	RFl17_aIL10+aPD1_-1_UNS	aIL10+aPD1	RFl17	minus_one	aIL10+aPD1_minus_one	UNS	A01
2	Sample_1	10	168	0.131868	14.6695	14.6745	1.83034	Sample_1	AI_export_Plate 1 UNS LN_A1_A01_CD4p_Live.fcs	RFl17_aIL10+aPD1_-1_UNS	aIL10+aPD1	RFl17	minus_one	aIL10+aPD1_minus_one	UNS	A01
3	Sample_1	11	10	0.00784929	26.9652	26.7331	0.498647	Sample_1	AI_export_Plate 1 UNS LN_A1_A01_CD4p_Live.fcs	RFl17_aIL10+aPD1_-1_UNS	aIL10+aPD1	RFl17	minus_one	aIL10+aPD1_minus_one	UNS	A01
4	Sample_1	12	7	0.00549451	8.71829	9.50606	1.3986	Sample_1	AI_export_Plate 1 UNS LN_A1_A01_CD4p_Live.fcs	RFl17_aIL10+aPD1_-1_UNS	aIL10+aPD1	RFl17	minus_one	aIL10+aPD1_minus_one	UNS	A01
5	Sample_1	13	18	0.0141287	18.5432	17.4779	1.88729	Sample_1	AI_export_Plate 1 UNS LN_A1_A01_CD4p_Live.fcs	RFl17_aIL10+aPD1_-1_UNS	aIL10+aPD1	RFl17	minus_one	aIL10+aPD1_minus_one	UNS	A01
6	Sample_1	14	0	0	NA	NA	NA	Sample_1	AI_export_Plate 1 UNS LN_A1_A01_CD4p_Live.fcs	RFl17_aIL10+aPD1_-1_UNS	aIL10+aPD1	RFl17	minus_one	aIL10+aPD1_minus_one	UNS	A01
7	Sample_1	15	1	0.000784929	NA	NA	NA	Sample_1	AI_export_Plate 1 UNS LN_A1_A01_CD4p_Live.fcs	RFl17_aIL10+aPD1_-1_UNS	aIL10+aPD1	RFl17	minus_one	aIL10+aPD1_minus_one	UNS	A01
8	Sample_1	16	8	0.00627943	27.0677	27.2804	0.405225	Sample_1	AI_export_Plate 1 UNS LN_A1_A01_CD4p_Live.fcs	RFl17_aIL10+aPD1_-1_UNS	aIL10+aPD1	RFl17	minus_one	aIL10+aPD1_minus_one	UNS	A01
9	Sample_1	17	1	0.000784929	NA	NA	NA	Sample_1	AI_export_Plate 1 UNS LN_A1_A01_CD4p_Live.fcs	RFl17_aIL10+aPD1_-1_UNS	aIL10+aPD1	RFl17	minus_one	aIL10+aPD1_minus_one	UNS	A01
10	Sample_1	18	2	0.00156986	23.5609	23.5609	NA	Sample_1	AI_export_Plate 1 UNS LN_A1_A01_CD4p_Live.fcs	RFl17_aIL10+aPD1_-1_UNS	aIL10+aPD1	RFl17	minus_one	aIL10+aPD1_minus_one	UNS	A01
11	Sample_1	2	73	0.0572998	4.04731	3.77363	1.40341	Sample_1	AI_export_Plate 1 UNS LN_A1_A01_CD4p_Live.fcs	RFl17_aIL10+aPD1_-1_UNS	aIL10+aPD1	RFl17	minus_one	aIL10+aPD1_minus_one	UNS	A01
12	Sample_1	3	339	0.266091	9.96358	10.0033	2.70195	Sample_1	AI_export_Plate 1 UNS LN_A1_A01_CD4p_Live.fcs	RFl17_aIL10+aPD1_-1_UNS	aIL10+aPD1	RFl17	minus_one	aIL10+aPD1_minus_one	UNS	A01
13	Sample_1	4	75	0.0588697	18.2009	18.5779	3.51104	Sample_1	AI_export_Plate 1 UNS LN_A1_A01_CD4p_Live.fcs	RFl17_aIL10+aPD1_-1_UNS	aIL10+aPD1	RFl17	minus_one	aIL10+aPD1_minus_one	UNS	A01
14	Sample_1	5	192	0.150706	22.7943	23.1056	2.01833	Sample_1	AI_export_Plate 1 UNS LN_A1_A01_CD4p_Live.fcs	RFl17_aIL10+aPD1_-1_UNS	aIL10+aPD1	RFl17	minus_one	aIL10+aPD1_minus_one	UNS	A01
15	Sample_1	6	131	0.102826	5.77089	5.5262	2.07766	Sample_1	AI_export_Plate 1 UNS LN_A1_A01_CD4p_Live.fcs	RFl17_aIL10+aPD1_-1_UNS	aIL10+aPD1	RFl17	minus_one	aIL10+aPD1_minus_one	UNS	A01
16	Sample_1	7	45	0.0353218	19.7718	20.423	2.79862	Sample_1	AI_export_Plate 1 UNS LN_A1_A01_CD4p_Live.fcs	RFl17_aIL10+aPD1_-1_UNS	aIL10+aPD1	RFl17	minus_one	aIL10+aPD1_minus_one	UNS	A01
17	Sample_1	8	16	0.0125589	25.9408	26.137	0.439986	Sample_1	AI_export_Plate 1 UNS LN_A1_A01_CD4p_Live.fcs	RFl17_aIL10+aPD1_-1_UNS	aIL10+aPD1	RFl17	minus_one	aIL10+aPD1_minus_one	UNS	A01
18	Sample_1	9	13	0.0102041	20.4681	23.5609	6.37241	Sample_1	AI_export_Plate 1 UNS LN_A1_A01_CD4p_Live.fcs	RFl17_aIL10+aPD1_-1_UNS	aIL10+aPD1	RFl17	minus_one	aIL10+aPD1_minus_one	UNS	A01
19	Sample_10	1	248	0.194662	3.20978	2.98495	2.37725	Sample_10	AI_export_Plate 1 UNS LN_A7_A07_CD4p_Live.fcs	RTd17_Control_-1_UNS	Control	RTd17	minus_one	Control_minus_one	UNS	A07
20	Sample_10	10	152	0.119309	15.2478	15.3891	1.90233	Sample_10	AI_export_Plate 1 UNS LN_A7_A07_CD4p_Live.fcs	RTd17_Control_-1_UNS	Control	RTd17	minus_one	Control_minus_one	UNS	A07
21	Sample_10	11	13	0.0102041	26.432	27.2281	2.7158	Sample_10	AI_export_Plate 1 UNS LN_A7_A07_CD4p_Live.fcs	RTd17_Control_-1_UNS	Control	RTd17	minus_one	Control_minus_one	UNS	A07
22	Sample_10	12	15	0.0117739	11.7926	9.61245	6.31498	Sample_10	AI_export_Plate 1 UNS LN_A7_A07_CD4p_Live.fcs	RTd17_Control_-1_UNS	Control	RTd17	minus_one	Control_minus_one	UNS	A07
23	Sample_10	13	38	0.0298273	17.2372	17.4779	3.79642	Sample_10	AI_export_Plate 1 UNS LN_A7_A07_CD4p_Live.fcs	RTd17_Control_-1_UNS	Control	RTd17	minus_one	Control_minus_one	UNS	A07
24	Sample_10	14	1	0.000784929	27.342	27.342	NA	Sample_10	AI_export_Plate 1 UNS LN_A7_A07_CD4p_Live.fcs	RTd17_Control_-1_UNS	Control	RTd17	minus_one	Control_minus_one	UNS	A07
25	Sample_10	15	2	0.00156986	NA	NA	NA	Sample_10	AI_export_Plate 1 UNS LN_A7_A07_CD4p_Live.fcs	RTd17_Control_-1_UNS	Control	RTd17	minus_one	Control_minus_one	UNS	A07
26	Sample_10	16	6	0.00470958	27.0777	27.1445	0.241446	Sample_10	AI_export_Plate 1 UNS LN_A7_A07_CD4p_Live.fcs	RTd17_Control_-1_UNS	Control	RTd17	minus_one	Control_minus_one	UNS	A07
27	Sample_10	17	1	0.000784929	NA	NA	NA	Sample_10	AI_export_Plate 1 UNS LN_A7_A07_CD4p_Live.fcs	RTd17_Control_-1_UNS	Control	RTd17	minus_one	Control_minus_one	UNS	A07
28	Sample_10	18	0	0	NA	NA	NA	Sample_10	AI_export_Plate 1 UNS LN_A7_A07_CD4p_Live.fcs	RTd17_Control_-1_UNS	Control	RTd17	minus_one	Control_minus_one	UNS	A07
29	Sample_10	2	78	0.0612245	4.07987	3.51093	2.08212	Sample_10	AI_export_Plate 1 UNS LN_A7_A07_CD4p_Live.fcs	RTd17_Control_-1_UNS	Control	RTd17	minus_one	Control_minus_one	UNS	A07
30	Sample_10	3	246	0.193093	9.91466	9.91149	2.61413	Sample_10	AI_export_Plate 1 UNS LN_A7_A07_CD4p_Live.fcs	RTd17_Control_-1_UNS	Control	RTd17	minus_one	Control_minus_one	UNS	A07
31	Sample_10	4	179	0.140502	18.4468	18.5779	2.61089	Sample_10	AI_export_Plate 1 UNS LN_A7_A07_CD4p_Live.fcs	RTd17_Control_-1_UNS	Control	RTd17	minus_one	Control_minus_one	UNS	A07
32	Sample_10	5	97	0.0761381	22.9005	22.8421	1.32605	Sample_10	AI_export_Plate 1 UNS LN_A7_A07_CD4p_Live.fcs	RTd17_Control_-1_UNS	Control	RTd17	minus_one	Control_minus_one	UNS	A07
33	Sample_10	6	82	0.0643642	5.63611	5.68103	1.67439	Sample_10	AI_export_Plate 1 UNS LN_A7_A07_CD4p_Live.fcs	RTd17_Control_-1_UNS	Control	RTd17	minus_one	Control_minus_one	UNS	A07
34	Sample_10	7	47	0.0368917	18.4628	17.824	2.77405	Sample_10	AI_export_Plate 1 UNS LN_A7_A07_CD4p_Live.fcs	RTd17_Control_-1_UNS	Control	RTd17	minus_one	Control_minus_one	UNS	A07
35	Sample_10	8	39	0.0306122	25.9051	25.8762	0.412241	Sample_10	AI_export_Plate 1 UNS LN_A7_A07_CD4p_Live.fcs	RTd17_Control_-1_UNS	Control	RTd17	minus_one	Control_minus_one	UNS	A07
36	Sample_10	9	30	0.0235479	17.7214	23.5609	7.68129	Sample_10	AI_export_Plate 1 UNS LN_A7_A07_CD4p_Live.fcs	RTd17_Control_-1_UNS	Control	RTd17	minus_one	Control_minus_one	UNS	A07
37	Sample_100	1	265	0.208006	3.3087	3.26777	1.81638	Sample_100	AI_export_Plate 2 UNS LN_A3_A03_CD4p_Live.fcs	RVc17_aIL10_12_UNS	aIL10	RVc17	twelve	aIL10_twelve	UNS	A03
38	Sample_100	10	111	0.0871272	15.0388	15.074	1.68195	Sample_100	AI_export_Plate 2 UNS LN_A3_A03_CD4p_Live.fcs	RVc17_aIL10_12_UNS	aIL10	RVc17	twelve	aIL10_twelve	UNS	A03
39	Sample_100	11	9	0.00706436	27.2656	27.557	0.440759	Sample_100	AI_export_Plate 2 UNS LN_A3_A03_CD4p_Live.fcs	RVc17_aIL10_12_UNS	aIL10	RVc17	twelve	aIL10_twelve	UNS	A03
40	Sample_100	12	5	0.00392465	10.5537	9.39912	5.62038	Sample_100	AI_export_Plate 2 UNS LN_A3_A03_CD4p_Live.fcs	RVc17_aIL10_12_UNS	aIL10	RVc17	twelve	aIL10_twelve	UNS	A03
41	Sample_100	13	6	0.00470958	20.1525	19.1907	3.60889	Sample_100	AI_export_Plate 2 UNS LN_A3_A03_CD4p_Live.fcs	RVc17_aIL10_12_UNS	aIL10	RVc17	twelve	aIL10_twelve	UNS	A03
42	Sample_100	14	1	0.000784929	26.6741	26.6741	NA	Sample_100	AI_export_Plate 2 UNS LN_A3_A03_CD4p_Live.fcs	RVc17_aIL10_12_UNS	aIL10	RVc17	twelve	aIL10_twelve	UNS	A03
43	Sample_100	15	0	0	NA	NA	NA	Sample_100	AI_export_Plate 2 UNS LN_A3_A03_CD4p_Live.fcs	RVc17_aIL10_12_UNS	aIL10	RVc17	twelve	aIL10_twelve	UNS	A03
44	Sample_100	16	1	0.000784929	26.6197	26.6197	NA	Sample_100	AI_export_Plate 2 UNS LN_A3_A03_CD4p_Live.fcs	RVc17_aIL10_12_UNS	aIL10	RVc17	twelve	aIL10_twelve	UNS	A03
45	Sample_100	17	0	0	NA	NA	NA	Sample_100	AI_export_Plate 2 UNS LN_A3_A03_CD4p_Live.fcs	RVc17_aIL10_12_UNS	aIL10	RVc17	twelve	aIL10_twelve	UNS	A03
46	Sample_100	18	0	0	NA	NA	NA	Sample_100	AI_export_Plate 2 UNS LN_A3_A03_CD4p_Live.fcs	RVc17_aIL10_12_UNS	aIL10	RVc17	twelve	aIL10_twelve	UNS	A03
47	Sample_100	2	277	0.217425	3.65579	3.45288	1.40873	Sample_100	AI_export_Plate 2 UNS LN_A3_A03_CD4p_Live.fcs	RVc17_aIL10_12_UNS	aIL10	RVc17	twelve	aIL10_twelve	UNS	A03
48	Sample_100	3	245	0.192308	9.86979	10.1132	2.18421	Sample_100	AI_export_Plate 2 UNS LN_A3_A03_CD4p_Live.fcs	RVc17_aIL10_12_UNS	aIL10	RVc17	twelve	aIL10_twelve	UNS	A03
49	Sample_100	4	126	0.0989011	18.9069	19.1684	2.54778	Sample_100	AI_export_Plate 2 UNS LN_A3_A03_CD4p_Live.fcs	RVc17_aIL10_12_UNS	aIL10	RVc17	twelve	aIL10_twelve	UNS	A03
50	Sample_100	5	73	0.0572998	23.2094	23.3019	0.642383	Sample_100	AI_export_Plate 2 UNS LN_A3_A03_CD4p_Live.fcs	RVc17_aIL10_12_UNS	aIL10	RVc17	twelve	aIL10_twelve	UNS	A03
51	Sample_100	6	114	0.0894819	5.05952	5.23125	1.4124	Sample_100	AI_export_Plate 2 UNS LN_A3_A03_CD4p_Live.fcs	RVc17_aIL10_12_UNS	aIL10	RVc17	twelve	aIL10_twelve	UNS	A03
52	Sample_100	7	21	0.0164835	17.7866	18.2633	4.22897	Sample_100	AI_export_Plate 2 UNS LN_A3_A03_CD4p_Live.fcs	RVc17_aIL10_12_UNS	aIL10	RVc17	twelve	aIL10_twelve	UNS	A03
53	Sample_100	8	11	0.00863422	26.1265	26.1073	0.236624	Sample_100	AI_export_Plate 2 UNS LN_A3_A03_CD4p_Live.fcs	RVc17_aIL10_12_UNS	aIL10	RVc17	twelve	aIL10_twelve	UNS	A03
54	Sample_100	9	9	0.00706436	15.1395	13.2599	8.2235	Sample_100	AI_export_Plate 2 UNS LN_A3_A03_CD4p_Live.fcs	RVc17_aIL10_12_UNS	aIL10	RVc17	twelve	aIL10_twelve	UNS	A03
55	Sample_101	1	137	0.107535	3.73236	3.72674	1.8265	Sample_101	AI_export_Plate 2 UNS LN_A4_A04_CD4p_Live.fcs	RZg17_Control_12_UNS	Control	RZg17	twelve	Control_twelve	UNS	A04
56	Sample_101	10	306	0.240188	15.058	15.234	1.47966	Sample_101	AI_export_Plate 2 UNS LN_A4_A04_CD4p_Live.fcs	RZg17_Control_12_UNS	Control	RZg17	twelve	Control_twelve	UNS	A04
57	Sample_101	11	4	0.00313972	27.2141	27.4829	0.591212	Sample_101	AI_export_Plate 2 UNS LN_A4_A04_CD4p_Live.fcs	RZg17_Control_12_UNS	Control	RZg17	twelve	Control_twelve	UNS	A04
58	Sample_101	12	11	0.00863422	10.5818	9.61245	3.48615	Sample_101	AI_export_Plate 2 UNS LN_A4_A04_CD4p_Live.fcs	RZg17_Control_12_UNS	Control	RZg17	twelve	Control_twelve	UNS	A04
59	Sample_101	13	32	0.0251177	17.4913	17.4779	2.93624	Sample_101	AI_export_Plate 2 UNS LN_A4_A04_CD4p_Live.fcs	RZg17_Control_12_UNS	Control	RZg17	twelve	Control_twelve	UNS	A04
60	Sample_101	14	2	0.00156986	27.342	27.342	NA	Sample_101	AI_export_Plate 2 UNS LN_A4_A04_CD4p_Live.fcs	RZg17_Control_12_UNS	Control	RZg17	twelve	Control_twelve	UNS	A04
61	Sample_101	15	0	0	NA	NA	NA	Sample_101	AI_export_Plate 2 UNS LN_A4_A04_CD4p_Live.fcs	RZg17_Control_12_UNS	Control	RZg17	twelve	Control_twelve	UNS	A04
62	Sample_101	16	1	0.000784929	27.0473	27.0473	NA	Sample_101	AI_export_Plate 2 UNS LN_A4_A04_CD4p_Live.fcs	RZg17_Control_12_UNS	Control	RZg17	twelve	Control_twelve	UNS	A04
63	Sample_101	17	3	0.00235479	NA	NA	NA	Sample_101	AI_export_Plate 2 UNS LN_A4_A04_CD4p_Live.fcs	RZg17_Control_12_UNS	Control	RZg17	twelve	Control_twelve	UNS	A04
64	Sample_101	18	0	0	NA	NA	NA	Sample_101	AI_export_Plate 2 UNS LN_A4_A04_CD4p_Live.fcs	RZg17_Control_12_UNS	Control	RZg17	twelve	Control_twelve	UNS	A04
65	Sample_101	2	94	0.0737834	3.80924	3.63783	1.50646	Sample_101	AI_export_Plate 2 UNS LN_A4_A04_CD4p_Live.fcs	RZg17_Control_12_UNS	Control	RZg17	twelve	Control_twelve	UNS	A04
66	Sample_101	3	282	0.22135	10.0434	10.1789	2.25731	Sample_101	AI_export_Plate 2 UNS LN_A4_A04_CD4p_Live.fcs	RZg17_Control_12_UNS	Control	RZg17	twelve	Control_twelve	UNS	A04
67	Sample_101	4	170	0.133438	18.0854	18.1287	2.50726	Sample_101	AI_export_Plate 2 UNS LN_A4_A04_CD4p_Live.fcs	RZg17_Control_12_UNS	Control	RZg17	twelve	Control_twelve	UNS	A04
68	Sample_101	5	84	0.0659341	23.0922	22.8042	0.686111	Sample_101	AI_export_Plate 2 UNS LN_A4_A04_CD4p_Live.fcs	RZg17_Control_12_UNS	Control	RZg17	twelve	Control_twelve	UNS	A04
69	Sample_101	6	85	0.066719	5.24714	5.2866	1.35956	Sample_101	AI_export_Plate 2 UNS LN_A4_A04_CD4p_Live.fcs	RZg17_Control_12_UNS	Control	RZg17	twelve	Control_twelve	UNS	A04
70	Sample_101	7	33	0.0259027	18.1741	17.7508	2.84404	Sample_101	AI_export_Plate 2 UNS LN_A4_A04_CD4p_Live.fcs	RZg17_Control_12_UNS	Control	RZg17	twelve	Control_twelve	UNS	A04
71	Sample_101	8	14	0.010989	24.7657	26.0456	4.37869	Sample_101	AI_export_Plate 2 UNS LN_A4_A04_CD4p_Live.fcs	RZg17_Control_12_UNS	Control	RZg17	twelve	Control_twelve	UNS	A04
72	Sample_101	9	16	0.0125589	17.4178	23.5496	8.16977	Sample_101	AI_export_Plate 2 UNS LN_A4_A04_CD4p_Live.fcs	RZg17_Control_12_UNS	Control	RZg17	twelve	Control_twelve	UNS	A04
73	Sample_102	1	282	0.22135	4.11254	4.04317	1.69639	Sample_102	AI_export_Plate 2 UNS LN_A5_A05_CD4p_Live.fcs	34920_aIL10_12_UNS	aIL10	34920	twelve	aIL10_twelve	UNS	A05
74	Sample_102	10	144	0.11303	14.664	14.6461	1.82933	Sample_102	AI_export_Plate 2 UNS LN_A5_A05_CD4p_Live.fcs	34920_aIL10_12_UNS	aIL10	34920	twelve	aIL10_twelve	UNS	A05
75	Sample_102	11	1	0.000784929	26.4551	26.4551	NA	Sample_102	AI_export_Plate 2 UNS LN_A5_A05_CD4p_Live.fcs	34920_aIL10_12_UNS	aIL10	34920	twelve	aIL10_twelve	UNS	A05
76	Sample_102	12	6	0.00470958	8.73934	9.40275	1.26022	Sample_102	AI_export_Plate 2 UNS LN_A5_A05_CD4p_Live.fcs	34920_aIL10_12_UNS	aIL10	34920	twelve	aIL10_twelve	UNS	A05
77	Sample_102	13	15	0.0117739	19.375	17.4779	3.23461	Sample_102	AI_export_Plate 2 UNS LN_A5_A05_CD4p_Live.fcs	34920_aIL10_12_UNS	aIL10	34920	twelve	aIL10_twelve	UNS	A05
78	Sample_102	14	1	0.000784929	27.342	27.342	NA	Sample_102	AI_export_Plate 2 UNS LN_A5_A05_CD4p_Live.fcs	34920_aIL10_12_UNS	aIL10	34920	twelve	aIL10_twelve	UNS	A05
79	Sample_102	15	0	0	NA	NA	NA	Sample_102	AI_export_Plate 2 UNS LN_A5_A05_CD4p_Live.fcs	34920_aIL10_12_UNS	aIL10	34920	twelve	aIL10_twelve	UNS	A05
80	Sample_102	16	0	0	NA	NA	NA	Sample_102	AI_export_Plate 2 UNS LN_A5_A05_CD4p_Live.fcs	34920_aIL10_12_UNS	aIL10	34920	twelve	aIL10_twelve	UNS	A05
81	Sample_102	17	2	0.00156986	8.30682	8.30682	NA	Sample_102	AI_export_Plate 2 UNS LN_A5_A05_CD4p_Live.fcs	34920_aIL10_12_UNS	aIL10	34920	twelve	aIL10_twelve	UNS	A05
82	Sample_102	18	1	0.000784929	3.60659	3.60659	NA	Sample_102	AI_export_Plate 2 UNS LN_A5_A05_CD4p_Live.fcs	34920_aIL10_12_UNS	aIL10	34920	twelve	aIL10_twelve	UNS	A05
83	Sample_102	2	212	0.166405	4.06599	3.73191	1.75598	Sample_102	AI_export_Plate 2 UNS LN_A5_A05_CD4p_Live.fcs	34920_aIL10_12_UNS	aIL10	34920	twelve	aIL10_twelve	UNS	A05
84	Sample_102	3	275	0.215856	9.3147	9.33646	2.27252	Sample_102	AI_export_Plate 2 UNS LN_A5_A05_CD4p_Live.fcs	34920_aIL10_12_UNS	aIL10	34920	twelve	aIL10_twelve	UNS	A05
85	Sample_102	4	72	0.0565149	17.8271	19.2332	4.3226	Sample_102	AI_export_Plate 2 UNS LN_A5_A05_CD4p_Live.fcs	34920_aIL10_12_UNS	aIL10	34920	twelve	aIL10_twelve	UNS	A05
86	Sample_102	5	51	0.0400314	22.3766	22.7177	3.68347	Sample_102	AI_export_Plate 2 UNS LN_A5_A05_CD4p_Live.fcs	34920_aIL10_12_UNS	aIL10	34920	twelve	aIL10_twelve	UNS	A05
87	Sample_102	6	184	0.144427	5.27459	5.38787	1.15516	Sample_102	AI_export_Plate 2 UNS LN_A5_A05_CD4p_Live.fcs	34920_aIL10_12_UNS	aIL10	34920	twelve	aIL10_twelve	UNS	A05
88	Sample_102	7	15	0.0117739	18.5866	19.4757	4.09435	Sample_102	AI_export_Plate 2 UNS LN_A5_A05_CD4p_Live.fcs	34920_aIL10_12_UNS	aIL10	34920	twelve	aIL10_twelve	UNS	A05
89	Sample_102	8	3	0.00235479	26.1513	26.0713	0.351294	Sample_102	AI_export_Plate 2 UNS LN_A5_A05_CD4p_Live.fcs	34920_aIL10_12_UNS	aIL10	34920	twelve	aIL10_twelve	UNS	A05
90	Sample_102	9	10	0.00784929	18.4035	23.5609	8.36565	Sample_102	AI_export_Plate 2 UNS LN_A5_A05_CD4p_Live.fcs	34920_aIL10_12_UNS	aIL10	34920	twelve	aIL10_twelve	UNS	A05
91	Sample_103	1	289	0.226845	3.84374	3.80462	2.14922	Sample_103	AI_export_Plate 2 UNS LN_A6_A06_CD4p_Live.fcs	34930_aIL10_12_UNS	aIL10	34930	twelve	aIL10_twelve	UNS	A06
92	Sample_103	10	113	0.088697	15.0802	15.546	2.01073	Sample_103	AI_export_Plate 2 UNS LN_A6_A06_CD4p_Live.fcs	34930_aIL10_12_UNS	aIL10	34930	twelve	aIL10_twelve	UNS	A06
93	Sample_103	11	10	0.00784929	26.4704	27.557	3.16673	Sample_103	AI_export_Plate 2 UNS LN_A6_A06_CD4p_Live.fcs	34930_aIL10_12_UNS	aIL10	34930	twelve	aIL10_twelve	UNS	A06
94	Sample_103	12	6	0.00470958	8.18124	8.43845	1.1393	Sample_103	AI_export_Plate 2 UNS LN_A6_A06_CD4p_Live.fcs	34930_aIL10_12_UNS	aIL10	34930	twelve	aIL10_twelve	UNS	A06
95	Sample_103	13	39	0.0306122	18.0438	17.4779	3.15158	Sample_103	AI_export_Plate 2 UNS LN_A6_A06_CD4p_Live.fcs	34930_aIL10_12_UNS	aIL10	34930	twelve	aIL10_twelve	UNS	A06
96	Sample_103	14	1	0.000784929	27.342	27.342	NA	Sample_103	AI_export_Plate 2 UNS LN_A6_A06_CD4p_Live.fcs	34930_aIL10_12_UNS	aIL10	34930	twelve	aIL10_twelve	UNS	A06
97	Sample_103	15	1	0.000784929	NA	NA	NA	Sample_103	AI_export_Plate 2 UNS LN_A6_A06_CD4p_Live.fcs	34930_aIL10_12_UNS	aIL10	34930	twelve	aIL10_twelve	UNS	A06
98	Sample_103	16	3	0.00235479	27.0122	27.0432	0.323628	Sample_103	AI_export_Plate 2 UNS LN_A6_A06_CD4p_Live.fcs	34930_aIL10_12_UNS	aIL10	34930	twelve	aIL10_twelve	UNS	A06
99	Sample_103	17	2	0.00156986	NA	NA	NA	Sample_103	AI_export_Plate 2 UNS LN_A6_A06_CD4p_Live.fcs	34930_aIL10_12_UNS	aIL10	34930	twelve	aIL10_twelve	UNS	A06
100	Sample_103	18	0	0	NA	NA	NA	Sample_103	AI_export_Plate 2 UNS LN_A6_A06_CD4p_Live.fcs	34930_aIL10_12_UNS	aIL10	34930	twelve	aIL10_twelve	UNS	A06
101	Sample_103	2	306	0.240188	3.59722	3.30879	1.93447	Sample_103	AI_export_Plate 2 UNS LN_A6_A06_CD4p_Live.fcs	34930_aIL10_12_UNS	aIL10	34930	twelve	aIL10_twelve	UNS	A06
102	Sample_103	3	170	0.133438	9.91157	10.0146	2.51285	Sample_103	AI_export_Plate 2 UNS LN_A6_A06_CD4p_Live.fcs	34930_aIL10_12_UNS	aIL10	34930	twelve	aIL10_twelve	UNS	A06
103	Sample_103	4	69	0.0541601	18.4816	18.8481	3.73189	Sample_103	AI_export_Plate 2 UNS LN_A6_A06_CD4p_Live.fcs	34930_aIL10_12_UNS	aIL10	34930	twelve	aIL10_twelve	UNS	A06
104	Sample_103	5	43	0.033752	22.8413	22.9167	1.00266	Sample_103	AI_export_Plate 2 UNS LN_A6_A06_CD4p_Live.fcs	34930_aIL10_12_UNS	aIL10	34930	twelve	aIL10_twelve	UNS	A06
105	Sample_103	6	148	0.11617	5.23981	5.32065	1.94081	Sample_103	AI_export_Plate 2 UNS LN_A6_A06_CD4p_Live.fcs	34930_aIL10_12_UNS	aIL10	34930	twelve	aIL10_twelve	UNS	A06
106	Sample_103	7	34	0.0266876	17.6664	18.1516	4.4098	Sample_103	AI_export_Plate 2 UNS LN_A6_A06_CD4p_Live.fcs	34930_aIL10_12_UNS	aIL10	34930	twelve	aIL10_twelve	UNS	A06
107	Sample_103	8	19	0.0149137	25.3586	25.6719	1.01654	Sample_103	AI_export_Plate 2 UNS LN_A6_A06_CD4p_Live.fcs	34930_aIL10_12_UNS	aIL10	34930	twelve	aIL10_twelve	UNS	A06
108	Sample_103	9	21	0.0164835	16.9903	23.3095	7.63435	Sample_103	AI_export_Plate 2 UNS LN_A6_A06_CD4p_Live.fcs	34930_aIL10_12_UNS	aIL10	34930	twelve	aIL10_twelve	UNS	A06
109	Sample_104	1	277	0.217425	3.74867	3.7543	2.56386	Sample_104	AI_export_Plate 2 UNS LN_A7_A07_CD4p_Live.fcs	REq17_Control_12_UNS	Control	REq17	twelve	Control_twelve	UNS	A07
110	Sample_104	10	134	0.105181	14.8525	14.8664	1.87813	Sample_104	AI_export_Plate 2 UNS LN_A7_A07_CD4p_Live.fcs	REq17_Control_12_UNS	Control	REq17	twelve	Control_twelve	UNS	A07
111	Sample_104	11	2	0.00156986	27.4529	27.4529	0.147273	Sample_104	AI_export_Plate 2 UNS LN_A7_A07_CD4p_Live.fcs	REq17_Control_12_UNS	Control	REq17	twelve	Control_twelve	UNS	A07
112	Sample_104	12	2	0.00156986	13.8004	13.8004	9.15169	Sample_104	AI_export_Plate 2 UNS LN_A7_A07_CD4p_Live.fcs	REq17_Control_12_UNS	Control	REq17	twelve	Control_twelve	UNS	A07
113	Sample_104	13	14	0.010989	18.6565	17.4779	2.71	Sample_104	AI_export_Plate 2 UNS LN_A7_A07_CD4p_Live.fcs	REq17_Control_12_UNS	Control	REq17	twelve	Control_twelve	UNS	A07
114	Sample_104	14	0	0	NA	NA	NA	Sample_104	AI_export_Plate 2 UNS LN_A7_A07_CD4p_Live.fcs	REq17_Control_12_UNS	Control	REq17	twelve	Control_twelve	UNS	A07
115	Sample_104	15	0	0	NA	NA	NA	Sample_104	AI_export_Plate 2 UNS LN_A7_A07_CD4p_Live.fcs	REq17_Control_12_UNS	Control	REq17	twelve	Control_twelve	UNS	A07
116	Sample_104	16	2	0.00156986	26.9386	26.9386	0.16274	Sample_104	AI_export_Plate 2 UNS LN_A7_A07_CD4p_Live.fcs	REq17_Control_12_UNS	Control	REq17	twelve	Control_twelve	UNS	A07
117	Sample_104	17	1	0.000784929	NA	NA	NA	Sample_104	AI_export_Plate 2 UNS LN_A7_A07_CD4p_Live.fcs	REq17_Control_12_UNS	Control	REq17	twelve	Control_twelve	UNS	A07
118	Sample_104	18	2	0.00156986	3.33187	3.33187	0.404664	Sample_104	AI_export_Plate 2 UNS LN_A7_A07_CD4p_Live.fcs	REq17_Control_12_UNS	Control	REq17	twelve	Control_twelve	UNS	A07
119	Sample_104	2	208	0.163265	3.7468	3.39867	2.20229	Sample_104	AI_export_Plate 2 UNS LN_A7_A07_CD4p_Live.fcs	REq17_Control_12_UNS	Control	REq17	twelve	Control_twelve	UNS	A07
120	Sample_104	3	172	0.135008	9.79539	9.82638	2.79712	Sample_104	AI_export_Plate 2 UNS LN_A7_A07_CD4p_Live.fcs	REq17_Control_12_UNS	Control	REq17	twelve	Control_twelve	UNS	A07
121	Sample_104	4	165	0.129513	18.5895	18.7914	3.10604	Sample_104	AI_export_Plate 2 UNS LN_A7_A07_CD4p_Live.fcs	REq17_Control_12_UNS	Control	REq17	twelve	Control_twelve	UNS	A07
122	Sample_104	5	64	0.0502355	23.0636	23.2267	1.15573	Sample_104	AI_export_Plate 2 UNS LN_A7_A07_CD4p_Live.fcs	REq17_Control_12_UNS	Control	REq17	twelve	Control_twelve	UNS	A07
123	Sample_104	6	149	0.116954	5.71052	5.64732	2.1949	Sample_104	AI_export_Plate 2 UNS LN_A7_A07_CD4p_Live.fcs	REq17_Control_12_UNS	Control	REq17	twelve	Control_twelve	UNS	A07
124	Sample_104	7	18	0.0141287	18.0836	17.7903	0.946805	Sample_104	AI_export_Plate 2 UNS LN_A7_A07_CD4p_Live.fcs	REq17_Control_12_UNS	Control	REq17	twelve	Control_twelve	UNS	A07
125	Sample_104	8	23	0.0180534	25.7169	25.8357	1.1197	Sample_104	AI_export_Plate 2 UNS LN_A7_A07_CD4p_Live.fcs	REq17_Control_12_UNS	Control	REq17	twelve	Control_twelve	UNS	A07
126	Sample_104	9	41	0.0321821	20.5877	23.5609	6.33293	Sample_104	AI_export_Plate 2 UNS LN_A7_A07_CD4p_Live.fcs	REq17_Control_12_UNS	Control	REq17	twelve	Control_twelve	UNS	A07
127	Sample_105	1	253	0.198587	2.90526	2.69989	2.04356	Sample_105	AI_export_Plate 2 UNS LN_A8_A08_CD4p_Live.fcs	RWs17_aIL10+aPD1_12_UNS	aIL10+aPD1	RWs17	twelve	aIL10+aPD1_twelve	UNS	A08
128	Sample_105	10	128	0.100471	14.7263	14.6009	1.28104	Sample_105	AI_export_Plate 2 UNS LN_A8_A08_CD4p_Live.fcs	RWs17_aIL10+aPD1_12_UNS	aIL10+aPD1	RWs17	twelve	aIL10+aPD1_twelve	UNS	A08
129	Sample_105	11	16	0.0125589	26.7632	27.557	2.49622	Sample_105	AI_export_Plate 2 UNS LN_A8_A08_CD4p_Live.fcs	RWs17_aIL10+aPD1_12_UNS	aIL10+aPD1	RWs17	twelve	aIL10+aPD1_twelve	UNS	A08
130	Sample_105	12	24	0.0188383	9.43503	9.61245	0.390235	Sample_105	AI_export_Plate 2 UNS LN_A8_A08_CD4p_Live.fcs	RWs17_aIL10+aPD1_12_UNS	aIL10+aPD1	RWs17	twelve	aIL10+aPD1_twelve	UNS	A08
131	Sample_105	13	28	0.021978	17.9577	17.4779	2.10082	Sample_105	AI_export_Plate 2 UNS LN_A8_A08_CD4p_Live.fcs	RWs17_aIL10+aPD1_12_UNS	aIL10+aPD1	RWs17	twelve	aIL10+aPD1_twelve	UNS	A08
132	Sample_105	14	0	0	NA	NA	NA	Sample_105	AI_export_Plate 2 UNS LN_A8_A08_CD4p_Live.fcs	RWs17_aIL10+aPD1_12_UNS	aIL10+aPD1	RWs17	twelve	aIL10+aPD1_twelve	UNS	A08
133	Sample_105	15	0	0	NA	NA	NA	Sample_105	AI_export_Plate 2 UNS LN_A8_A08_CD4p_Live.fcs	RWs17_aIL10+aPD1_12_UNS	aIL10+aPD1	RWs17	twelve	aIL10+aPD1_twelve	UNS	A08
134	Sample_105	16	0	0	NA	NA	NA	Sample_105	AI_export_Plate 2 UNS LN_A8_A08_CD4p_Live.fcs	RWs17_aIL10+aPD1_12_UNS	aIL10+aPD1	RWs17	twelve	aIL10+aPD1_twelve	UNS	A08
135	Sample_105	17	0	0	NA	NA	NA	Sample_105	AI_export_Plate 2 UNS LN_A8_A08_CD4p_Live.fcs	RWs17_aIL10+aPD1_12_UNS	aIL10+aPD1	RWs17	twelve	aIL10+aPD1_twelve	UNS	A08
136	Sample_105	18	0	0	NA	NA	NA	Sample_105	AI_export_Plate 2 UNS LN_A8_A08_CD4p_Live.fcs	RWs17_aIL10+aPD1_12_UNS	aIL10+aPD1	RWs17	twelve	aIL10+aPD1_twelve	UNS	A08
137	Sample_105	2	349	0.27394	3.35014	3.17797	1.61489	Sample_105	AI_export_Plate 2 UNS LN_A8_A08_CD4p_Live.fcs	RWs17_aIL10+aPD1_12_UNS	aIL10+aPD1	RWs17	twelve	aIL10+aPD1_twelve	UNS	A08
138	Sample_105	3	188	0.147567	9.5977	10.0007	2.19031	Sample_105	AI_export_Plate 2 UNS LN_A8_A08_CD4p_Live.fcs	RWs17_aIL10+aPD1_12_UNS	aIL10+aPD1	RWs17	twelve	aIL10+aPD1_twelve	UNS	A08
139	Sample_105	4	59	0.0463108	18.2489	18.6037	2.92217	Sample_105	AI_export_Plate 2 UNS LN_A8_A08_CD4p_Live.fcs	RWs17_aIL10+aPD1_12_UNS	aIL10+aPD1	RWs17	twelve	aIL10+aPD1_twelve	UNS	A08
140	Sample_105	5	88	0.0690738	22.9389	22.8507	1.30105	Sample_105	AI_export_Plate 2 UNS LN_A8_A08_CD4p_Live.fcs	RWs17_aIL10+aPD1_12_UNS	aIL10+aPD1	RWs17	twelve	aIL10+aPD1_twelve	UNS	A08
141	Sample_105	6	87	0.0682889	5.28414	5.39425	1.36405	Sample_105	AI_export_Plate 2 UNS LN_A8_A08_CD4p_Live.fcs	RWs17_aIL10+aPD1_12_UNS	aIL10+aPD1	RWs17	twelve	aIL10+aPD1_twelve	UNS	A08
142	Sample_105	7	18	0.0141287	18.4163	20.1824	4.67211	Sample_105	AI_export_Plate 2 UNS LN_A8_A08_CD4p_Live.fcs	RWs17_aIL10+aPD1_12_UNS	aIL10+aPD1	RWs17	twelve	aIL10+aPD1_twelve	UNS	A08
143	Sample_105	8	17	0.0133438	25.3226	25.7764	1.00208	Sample_105	AI_export_Plate 2 UNS LN_A8_A08_CD4p_Live.fcs	RWs17_aIL10+aPD1_12_UNS	aIL10+aPD1	RWs17	twelve	aIL10+aPD1_twelve	UNS	A08
144	Sample_105	9	19	0.0149137	17.4856	23.5609	8.15295	Sample_105	AI_export_Plate 2 UNS LN_A8_A08_CD4p_Live.fcs	RWs17_aIL10+aPD1_12_UNS	aIL10+aPD1	RWs17	twelve	aIL10+aPD1_twelve	UNS	A08
145	Sample_106	1	253	0.198587	3.0588	2.52339	2.45208	Sample_106	AI_export_Plate 2 UNS LN_A9_A09_CD4p_Live.fcs	34918_aIL10+aPD1_21_UNS	aIL10+aPD1	34918	twenty_one	aIL10+aPD1_twenty_one	UNS	A09
146	Sample_106	10	42	0.032967	16.051	16.1134	2.13601	Sample_106	AI_export_Plate 2 UNS LN_A9_A09_CD4p_Live.fcs	34918_aIL10+aPD1_21_UNS	aIL10+aPD1	34918	twenty_one	aIL10+aPD1_twenty_one	UNS	A09
147	Sample_106	11	14	0.010989	27.2802	27.4538	0.46666	Sample_106	AI_export_Plate 2 UNS LN_A9_A09_CD4p_Live.fcs	34918_aIL10+aPD1_21_UNS	aIL10+aPD1	34918	twenty_one	aIL10+aPD1_twenty_one	UNS	A09
148	Sample_106	12	11	0.00863422	9.27468	9.61147	0.630731	Sample_106	AI_export_Plate 2 UNS LN_A9_A09_CD4p_Live.fcs	34918_aIL10+aPD1_21_UNS	aIL10+aPD1	34918	twenty_one	aIL10+aPD1_twenty_one	UNS	A09
149	Sample_106	13	17	0.0133438	18.1625	17.4779	1.53111	Sample_106	AI_export_Plate 2 UNS LN_A9_A09_CD4p_Live.fcs	34918_aIL10+aPD1_21_UNS	aIL10+aPD1	34918	twenty_one	aIL10+aPD1_twenty_one	UNS	A09
150	Sample_106	14	2	0.00156986	27.342	27.342	NA	Sample_106	AI_export_Plate 2 UNS LN_A9_A09_CD4p_Live.fcs	34918_aIL10+aPD1_21_UNS	aIL10+aPD1	34918	twenty_one	aIL10+aPD1_twenty_one	UNS	A09
151	Sample_106	15	5	0.00392465	10.42	10.42	NA	Sample_106	AI_export_Plate 2 UNS LN_A9_A09_CD4p_Live.fcs	34918_aIL10+aPD1_21_UNS	aIL10+aPD1	34918	twenty_one	aIL10+aPD1_twenty_one	UNS	A09
152	Sample_106	16	4	0.00313972	27.274	27.3231	0.158834	Sample_106	AI_export_Plate 2 UNS LN_A9_A09_CD4p_Live.fcs	34918_aIL10+aPD1_21_UNS	aIL10+aPD1	34918	twenty_one	aIL10+aPD1_twenty_one	UNS	A09
153	Sample_106	17	0	0	NA	NA	NA	Sample_106	AI_export_Plate 2 UNS LN_A9_A09_CD4p_Live.fcs	34918_aIL10+aPD1_21_UNS	aIL10+aPD1	34918	twenty_one	aIL10+aPD1_twenty_one	UNS	A09
154	Sample_106	18	0	0	NA	NA	NA	Sample_106	AI_export_Plate 2 UNS LN_A9_A09_CD4p_Live.fcs	34918_aIL10+aPD1_21_UNS	aIL10+aPD1	34918	twenty_one	aIL10+aPD1_twenty_one	UNS	A09
155	Sample_106	2	273	0.214286	3.00427	2.91275	1.94284	Sample_106	AI_export_Plate 2 UNS LN_A9_A09_CD4p_Live.fcs	34918_aIL10+aPD1_21_UNS	aIL10+aPD1	34918	twenty_one	aIL10+aPD1_twenty_one	UNS	A09
156	Sample_106	3	197	0.154631	9.20363	9.34217	2.11954	Sample_106	AI_export_Plate 2 UNS LN_A9_A09_CD4p_Live.fcs	34918_aIL10+aPD1_21_UNS	aIL10+aPD1	34918	twenty_one	aIL10+aPD1_twenty_one	UNS	A09
157	Sample_106	4	117	0.0918367	19.0901	19.7547	3.44943	Sample_106	AI_export_Plate 2 UNS LN_A9_A09_CD4p_Live.fcs	34918_aIL10+aPD1_21_UNS	aIL10+aPD1	34918	twenty_one	aIL10+aPD1_twenty_one	UNS	A09
158	Sample_106	5	88	0.0690738	23.2856	23.4342	1.23921	Sample_106	AI_export_Plate 2 UNS LN_A9_A09_CD4p_Live.fcs	34918_aIL10+aPD1_21_UNS	aIL10+aPD1	34918	twenty_one	aIL10+aPD1_twenty_one	UNS	A09
159	Sample_106	6	105	0.0824176	6.13881	5.86345	3.81705	Sample_106	AI_export_Plate 2 UNS LN_A9_A09_CD4p_Live.fcs	34918_aIL10+aPD1_21_UNS	aIL10+aPD1	34918	twenty_one	aIL10+aPD1_twenty_one	UNS	A09
160	Sample_106	7	57	0.044741	18.433	18.0812	3.50132	Sample_106	AI_export_Plate 2 UNS LN_A9_A09_CD4p_Live.fcs	34918_aIL10+aPD1_21_UNS	aIL10+aPD1	34918	twenty_one	aIL10+aPD1_twenty_one	UNS	A09
161	Sample_106	8	56	0.043956	25.618	25.7445	0.56655	Sample_106	AI_export_Plate 2 UNS LN_A9_A09_CD4p_Live.fcs	34918_aIL10+aPD1_21_UNS	aIL10+aPD1	34918	twenty_one	aIL10+aPD1_twenty_one	UNS	A09
162	Sample_106	9	33	0.0259027	18.4219	23.3095	7.75599	Sample_106	AI_export_Plate 2 UNS LN_A9_A09_CD4p_Live.fcs	34918_aIL10+aPD1_21_UNS	aIL10+aPD1	34918	twenty_one	aIL10+aPD1_twenty_one	UNS	A09
163	Sample_107	1	311	0.244113	3.02631	2.32791	2.66078	Sample_107	AI_export_Plate 2 UNS LN_B1_B01_CD4p_export_Plate 2 UNS LN_B1_B01_CD4p_Live.fcs	RKq17_aIL10+aPD1_21_UNS	aIL10+aPD1	RKq17	twenty_one	aIL10+aPD1_twenty_one	UNS	B01
164	Sample_107	10	130	0.102041	14.9358	15.101	1.86202	Sample_107	AI_export_Plate 2 UNS LN_B1_B01_CD4p_export_Plate 2 UNS LN_B1_B01_CD4p_Live.fcs	RKq17_aIL10+aPD1_21_UNS	aIL10+aPD1	RKq17	twenty_one	aIL10+aPD1_twenty_one	UNS	B01
165	Sample_107	11	13	0.0102041	27.3402	27.557	0.394407	Sample_107	AI_export_Plate 2 UNS LN_B1_B01_CD4p_export_Plate 2 UNS LN_B1_B01_CD4p_Live.fcs	RKq17_aIL10+aPD1_21_UNS	aIL10+aPD1	RKq17	twenty_one	aIL10+aPD1_twenty_one	UNS	B01
166	Sample_107	12	5	0.00392465	9.21376	9.61245	0.897576	Sample_107	AI_export_Plate 2 UNS LN_B1_B01_CD4p_export_Plate 2 UNS LN_B1_B01_CD4p_Live.fcs	RKq17_aIL10+aPD1_21_UNS	aIL10+aPD1	RKq17	twenty_one	aIL10+aPD1_twenty_one	UNS	B01
167	Sample_107	13	5	0.00392465	16.4348	17.4779	6.30905	Sample_107	AI_export_Plate 2 UNS LN_B1_B01_CD4p_export_Plate 2 UNS LN_B1_B01_CD4p_Live.fcs	RKq17_aIL10+aPD1_21_UNS	aIL10+aPD1	RKq17	twenty_one	aIL10+aPD1_twenty_one	UNS	B01
168	Sample_107	14	5	0.00392465	27.342	27.342	1.96739e-08	Sample_107	AI_export_Plate 2 UNS LN_B1_B01_CD4p_export_Plate 2 UNS LN_B1_B01_CD4p_Live.fcs	RKq17_aIL10+aPD1_21_UNS	aIL10+aPD1	RKq17	twenty_one	aIL10+aPD1_twenty_one	UNS	B01
169	Sample_107	15	0	0	NA	NA	NA	Sample_107	AI_export_Plate 2 UNS LN_B1_B01_CD4p_export_Plate 2 UNS LN_B1_B01_CD4p_Live.fcs	RKq17_aIL10+aPD1_21_UNS	aIL10+aPD1	RKq17	twenty_one	aIL10+aPD1_twenty_one	UNS	B01
170	Sample_107	16	1	0.000784929	NA	NA	NA	Sample_107	AI_export_Plate 2 UNS LN_B1_B01_CD4p_export_Plate 2 UNS LN_B1_B01_CD4p_Live.fcs	RKq17_aIL10+aPD1_21_UNS	aIL10+aPD1	RKq17	twenty_one	aIL10+aPD1_twenty_one	UNS	B01
171	Sample_107	17	1	0.000784929	NA	NA	NA	Sample_107	AI_export_Plate 2 UNS LN_B1_B01_CD4p_export_Plate 2 UNS LN_B1_B01_CD4p_Live.fcs	RKq17_aIL10+aPD1_21_UNS	aIL10+aPD1	RKq17	twenty_one	aIL10+aPD1_twenty_one	UNS	B01
172	Sample_107	18	3	0.00235479	7.17865	7.17865	5.08849	Sample_107	AI_export_Plate 2 UNS LN_B1_B01_CD4p_export_Plate 2 UNS LN_B1_B01_CD4p_Live.fcs	RKq17_aIL10+aPD1_21_UNS	aIL10+aPD1	RKq17	twenty_one	aIL10+aPD1_twenty_one	UNS	B01
173	Sample_107	2	217	0.17033	3.48425	3.14432	1.94773	Sample_107	AI_export_Plate 2 UNS LN_B1_B01_CD4p_export_Plate 2 UNS LN_B1_B01_CD4p_Live.fcs	RKq17_aIL10+aPD1_21_UNS	aIL10+aPD1	RKq17	twenty_one	aIL10+aPD1_twenty_one	UNS	B01
174	Sample_107	3	124	0.0973312	10.1362	10.0033	2.63947	Sample_107	AI_export_Plate 2 UNS LN_B1_B01_CD4p_export_Plate 2 UNS LN_B1_B01_CD4p_Live.fcs	RKq17_aIL10+aPD1_21_UNS	aIL10+aPD1	RKq17	twenty_one	aIL10+aPD1_twenty_one	UNS	B01
175	Sample_107	4	80	0.0627943	18.1795	19.3826	4.88826	Sample_107	AI_export_Plate 2 UNS LN_B1_B01_CD4p_export_Plate 2 UNS LN_B1_B01_CD4p_Live.fcs	RKq17_aIL10+aPD1_21_UNS	aIL10+aPD1	RKq17	twenty_one	aIL10+aPD1_twenty_one	UNS	B01
176	Sample_107	5	88	0.0690738	23.19	23.5049	1.55532	Sample_107	AI_export_Plate 2 UNS LN_B1_B01_CD4p_export_Plate 2 UNS LN_B1_B01_CD4p_Live.fcs	RKq17_aIL10+aPD1_21_UNS	aIL10+aPD1	RKq17	twenty_one	aIL10+aPD1_twenty_one	UNS	B01
177	Sample_107	6	182	0.142857	5.54496	5.64732	2.01825	Sample_107	AI_export_Plate 2 UNS LN_B1_B01_CD4p_export_Plate 2 UNS LN_B1_B01_CD4p_Live.fcs	RKq17_aIL10+aPD1_21_UNS	aIL10+aPD1	RKq17	twenty_one	aIL10+aPD1_twenty_one	UNS	B01
178	Sample_107	7	30	0.0235479	18.3612	18.1456	3.81617	Sample_107	AI_export_Plate 2 UNS LN_B1_B01_CD4p_export_Plate 2 UNS LN_B1_B01_CD4p_Live.fcs	RKq17_aIL10+aPD1_21_UNS	aIL10+aPD1	RKq17	twenty_one	aIL10+aPD1_twenty_one	UNS	B01
179	Sample_107	8	58	0.0455259	25.1578	25.0772	0.428281	Sample_107	AI_export_Plate 2 UNS LN_B1_B01_CD4p_export_Plate 2 UNS LN_B1_B01_CD4p_Live.fcs	RKq17_aIL10+aPD1_21_UNS	aIL10+aPD1	RKq17	twenty_one	aIL10+aPD1_twenty_one	UNS	B01
180	Sample_107	9	21	0.0164835	16.118	23.5609	8.36014	Sample_107	AI_export_Plate 2 UNS LN_B1_B01_CD4p_export_Plate 2 UNS LN_B1_B01_CD4p_Live.fcs	RKq17_aIL10+aPD1_21_UNS	aIL10+aPD1	RKq17	twenty_one	aIL10+aPD1_twenty_one	UNS	B01
181	Sample_108	1	260	0.204082	3.01661	2.4207	2.5207	Sample_108	AI_export_Plate 2 UNS LN_B10_B10_CD4p_Live.fcs	34918_aIL10+aPD1_36_UNS	aIL10+aPD1	34918	thirty_six	aIL10+aPD1_thirty_six	UNS	B10
182	Sample_108	10	31	0.0243328	15.5791	15.47	2.0702	Sample_108	AI_export_Plate 2 UNS LN_B10_B10_CD4p_Live.fcs	34918_aIL10+aPD1_36_UNS	aIL10+aPD1	34918	thirty_six	aIL10+aPD1_thirty_six	UNS	B10
183	Sample_108	11	28	0.021978	27.2183	27.3638	0.441872	Sample_108	AI_export_Plate 2 UNS LN_B10_B10_CD4p_Live.fcs	34918_aIL10+aPD1_36_UNS	aIL10+aPD1	34918	thirty_six	aIL10+aPD1_thirty_six	UNS	B10
184	Sample_108	12	16	0.0125589	9.9544	9.61221	3.20895	Sample_108	AI_export_Plate 2 UNS LN_B10_B10_CD4p_Live.fcs	34918_aIL10+aPD1_36_UNS	aIL10+aPD1	34918	thirty_six	aIL10+aPD1_thirty_six	UNS	B10
185	Sample_108	13	23	0.0180534	16.9075	17.4779	4.69366	Sample_108	AI_export_Plate 2 UNS LN_B10_B10_CD4p_Live.fcs	34918_aIL10+aPD1_36_UNS	aIL10+aPD1	34918	thirty_six	aIL10+aPD1_thirty_six	UNS	B10
186	Sample_108	14	1	0.000784929	27.342	27.342	NA	Sample_108	AI_export_Plate 2 UNS LN_B10_B10_CD4p_Live.fcs	34918_aIL10+aPD1_36_UNS	aIL10+aPD1	34918	thirty_six	aIL10+aPD1_thirty_six	UNS	B10
187	Sample_108	15	4	0.00313972	NA	NA	NA	Sample_108	AI_export_Plate 2 UNS LN_B10_B10_CD4p_Live.fcs	34918_aIL10+aPD1_36_UNS	aIL10+aPD1	34918	thirty_six	aIL10+aPD1_thirty_six	UNS	B10
188	Sample_108	16	1	0.000784929	26.8413	26.8413	NA	Sample_108	AI_export_Plate 2 UNS LN_B10_B10_CD4p_Live.fcs	34918_aIL10+aPD1_36_UNS	aIL10+aPD1	34918	thirty_six	aIL10+aPD1_thirty_six	UNS	B10
189	Sample_108	17	0	0	NA	NA	NA	Sample_108	AI_export_Plate 2 UNS LN_B10_B10_CD4p_Live.fcs	34918_aIL10+aPD1_36_UNS	aIL10+aPD1	34918	thirty_six	aIL10+aPD1_thirty_six	UNS	B10
190	Sample_108	18	1	0.000784929	NA	NA	NA	Sample_108	AI_export_Plate 2 UNS LN_B10_B10_CD4p_Live.fcs	34918_aIL10+aPD1_36_UNS	aIL10+aPD1	34918	thirty_six	aIL10+aPD1_thirty_six	UNS	B10
191	Sample_108	2	200	0.156986	3.26809	3.04573	2.21754	Sample_108	AI_export_Plate 2 UNS LN_B10_B10_CD4p_Live.fcs	34918_aIL10+aPD1_36_UNS	aIL10+aPD1	34918	thirty_six	aIL10+aPD1_thirty_six	UNS	B10
192	Sample_108	3	247	0.193878	9.65245	9.66395	2.64871	Sample_108	AI_export_Plate 2 UNS LN_B10_B10_CD4p_Live.fcs	34918_aIL10+aPD1_36_UNS	aIL10+aPD1	34918	thirty_six	aIL10+aPD1_thirty_six	UNS	B10
193	Sample_108	4	135	0.105965	18.3534	19.3696	3.97082	Sample_108	AI_export_Plate 2 UNS LN_B10_B10_CD4p_Live.fcs	34918_aIL10+aPD1_36_UNS	aIL10+aPD1	34918	thirty_six	aIL10+aPD1_thirty_six	UNS	B10
194	Sample_108	5	111	0.0871272	23.0592	23.6201	2.18334	Sample_108	AI_export_Plate 2 UNS LN_B10_B10_CD4p_Live.fcs	34918_aIL10+aPD1_36_UNS	aIL10+aPD1	34918	thirty_six	aIL10+aPD1_thirty_six	UNS	B10
195	Sample_108	6	66	0.0518053	5.52528	6.10761	2.07106	Sample_108	AI_export_Plate 2 UNS LN_B10_B10_CD4p_Live.fcs	34918_aIL10+aPD1_36_UNS	aIL10+aPD1	34918	thirty_six	aIL10+aPD1_thirty_six	UNS	B10
196	Sample_108	7	44	0.0345369	19.2163	18.4867	1.5901	Sample_108	AI_export_Plate 2 UNS LN_B10_B10_CD4p_Live.fcs	34918_aIL10+aPD1_36_UNS	aIL10+aPD1	34918	thirty_six	aIL10+aPD1_thirty_six	UNS	B10
197	Sample_108	8	57	0.044741	25.8222	25.8721	0.52752	Sample_108	AI_export_Plate 2 UNS LN_B10_B10_CD4p_Live.fcs	34918_aIL10+aPD1_36_UNS	aIL10+aPD1	34918	thirty_six	aIL10+aPD1_thirty_six	UNS	B10
198	Sample_108	9	49	0.0384615	20.0468	23.5609	6.51589	Sample_108	AI_export_Plate 2 UNS LN_B10_B10_CD4p_Live.fcs	34918_aIL10+aPD1_36_UNS	aIL10+aPD1	34918	thirty_six	aIL10+aPD1_thirty_six	UNS	B10
199	Sample_109	1	400	0.313972	2.89964	2.1387	2.89607	Sample_109	AI_export_Plate 2 UNS LN_B11_B11_CD4p_Live.fcs	RBf17_aIL10+aPD1_36_UNS	aIL10+aPD1	RBf17	thirty_six	aIL10+aPD1_thirty_six	UNS	B11
200	Sample_109	10	35	0.0274725	14.6831	14.9482	2.43326	Sample_109	AI_export_Plate 2 UNS LN_B11_B11_CD4p_Live.fcs	RBf17_aIL10+aPD1_36_UNS	aIL10+aPD1	RBf17	thirty_six	aIL10+aPD1_thirty_six	UNS	B11
201	Sample_109	11	6	0.00470958	27.2377	27.3603	0.420609	Sample_109	AI_export_Plate 2 UNS LN_B11_B11_CD4p_Live.fcs	RBf17_aIL10+aPD1_36_UNS	aIL10+aPD1	RBf17	thirty_six	aIL10+aPD1_thirty_six	UNS	B11
202	Sample_109	12	2	0.00156986	9.24429	9.24429	0.580639	Sample_109	AI_export_Plate 2 UNS LN_B11_B11_CD4p_Live.fcs	RBf17_aIL10+aPD1_36_UNS	aIL10+aPD1	RBf17	thirty_six	aIL10+aPD1_thirty_six	UNS	B11
203	Sample_109	13	13	0.0102041	16.7484	17.4779	2.86397	Sample_109	AI_export_Plate 2 UNS LN_B11_B11_CD4p_Live.fcs	RBf17_aIL10+aPD1_36_UNS	aIL10+aPD1	RBf17	thirty_six	aIL10+aPD1_thirty_six	UNS	B11
204	Sample_109	14	0	0	NA	NA	NA	Sample_109	AI_export_Plate 2 UNS LN_B11_B11_CD4p_Live.fcs	RBf17_aIL10+aPD1_36_UNS	aIL10+aPD1	RBf17	thirty_six	aIL10+aPD1_thirty_six	UNS	B11
205	Sample_109	15	3	0.00235479	10.7768	10.7768	NA	Sample_109	AI_export_Plate 2 UNS LN_B11_B11_CD4p_Live.fcs	RBf17_aIL10+aPD1_36_UNS	aIL10+aPD1	RBf17	thirty_six	aIL10+aPD1_thirty_six	UNS	B11
206	Sample_109	16	2	0.00156986	27.1007	27.1007	0.0812397	Sample_109	AI_export_Plate 2 UNS LN_B11_B11_CD4p_Live.fcs	RBf17_aIL10+aPD1_36_UNS	aIL10+aPD1	RBf17	thirty_six	aIL10+aPD1_thirty_six	UNS	B11
207	Sample_109	17	1	0.000784929	NA	NA	NA	Sample_109	AI_export_Plate 2 UNS LN_B11_B11_CD4p_Live.fcs	RBf17_aIL10+aPD1_36_UNS	aIL10+aPD1	RBf17	thirty_six	aIL10+aPD1_thirty_six	UNS	B11
208	Sample_109	18	0	0	NA	NA	NA	Sample_109	AI_export_Plate 2 UNS LN_B11_B11_CD4p_Live.fcs	RBf17_aIL10+aPD1_36_UNS	aIL10+aPD1	RBf17	thirty_six	aIL10+aPD1_thirty_six	UNS	B11
209	Sample_109	2	297	0.233124	2.95908	2.67775	1.75071	Sample_109	AI_export_Plate 2 UNS LN_B11_B11_CD4p_Live.fcs	RBf17_aIL10+aPD1_36_UNS	aIL10+aPD1	RBf17	thirty_six	aIL10+aPD1_thirty_six	UNS	B11
210	Sample_109	3	119	0.0934066	9.32412	9.35695	2.6637	Sample_109	AI_export_Plate 2 UNS LN_B11_B11_CD4p_Live.fcs	RBf17_aIL10+aPD1_36_UNS	aIL10+aPD1	RBf17	thirty_six	aIL10+aPD1_thirty_six	UNS	B11
211	Sample_109	4	62	0.0486656	18.0643	19.1748	4.63498	Sample_109	AI_export_Plate 2 UNS LN_B11_B11_CD4p_Live.fcs	RBf17_aIL10+aPD1_36_UNS	aIL10+aPD1	RBf17	thirty_six	aIL10+aPD1_thirty_six	UNS	B11
212	Sample_109	5	87	0.0682889	23.5477	23.8388	0.722112	Sample_109	AI_export_Plate 2 UNS LN_B11_B11_CD4p_Live.fcs	RBf17_aIL10+aPD1_36_UNS	aIL10+aPD1	RBf17	thirty_six	aIL10+aPD1_thirty_six	UNS	B11
213	Sample_109	6	121	0.0949765	5.33628	6.01122	1.83459	Sample_109	AI_export_Plate 2 UNS LN_B11_B11_CD4p_Live.fcs	RBf17_aIL10+aPD1_36_UNS	aIL10+aPD1	RBf17	thirty_six	aIL10+aPD1_thirty_six	UNS	B11
214	Sample_109	7	18	0.0141287	16.2671	18.6186	6.51644	Sample_109	AI_export_Plate 2 UNS LN_B11_B11_CD4p_Live.fcs	RBf17_aIL10+aPD1_36_UNS	aIL10+aPD1	RBf17	thirty_six	aIL10+aPD1_thirty_six	UNS	B11
215	Sample_109	8	77	0.0604396	25.0571	24.9433	0.391839	Sample_109	AI_export_Plate 2 UNS LN_B11_B11_CD4p_Live.fcs	RBf17_aIL10+aPD1_36_UNS	aIL10+aPD1	RBf17	thirty_six	aIL10+aPD1_thirty_six	UNS	B11
216	Sample_109	9	31	0.0243328	19.0851	23.5609	7.25661	Sample_109	AI_export_Plate 2 UNS LN_B11_B11_CD4p_Live.fcs	RBf17_aIL10+aPD1_36_UNS	aIL10+aPD1	RBf17	thirty_six	aIL10+aPD1_thirty_six	UNS	B11
217	Sample_11	1	211	0.16562	3.15597	2.8616	2.37627	Sample_11	AI_export_Plate 1 UNS LN_A8_A08_CD4p_Live.fcs	34897_aIL10_-1_UNS	aIL10	34897	minus_one	aIL10_minus_one	UNS	A08
218	Sample_11	10	275	0.215856	14.752	14.6009	1.73855	Sample_11	AI_export_Plate 1 UNS LN_A8_A08_CD4p_Live.fcs	34897_aIL10_-1_UNS	aIL10	34897	minus_one	aIL10_minus_one	UNS	A08
219	Sample_11	11	2	0.00156986	26.687	26.687	0.177987	Sample_11	AI_export_Plate 1 UNS LN_A8_A08_CD4p_Live.fcs	34897_aIL10_-1_UNS	aIL10	34897	minus_one	aIL10_minus_one	UNS	A08
220	Sample_11	12	12	0.00941915	9.17795	9.61013	0.781023	Sample_11	AI_export_Plate 1 UNS LN_A8_A08_CD4p_Live.fcs	34897_aIL10_-1_UNS	aIL10	34897	minus_one	aIL10_minus_one	UNS	A08
221	Sample_11	13	13	0.0102041	18.3197	17.4779	1.66891	Sample_11	AI_export_Plate 1 UNS LN_A8_A08_CD4p_Live.fcs	34897_aIL10_-1_UNS	aIL10	34897	minus_one	aIL10_minus_one	UNS	A08
222	Sample_11	14	0	0	NA	NA	NA	Sample_11	AI_export_Plate 1 UNS LN_A8_A08_CD4p_Live.fcs	34897_aIL10_-1_UNS	aIL10	34897	minus_one	aIL10_minus_one	UNS	A08
223	Sample_11	15	0	0	NA	NA	NA	Sample_11	AI_export_Plate 1 UNS LN_A8_A08_CD4p_Live.fcs	34897_aIL10_-1_UNS	aIL10	34897	minus_one	aIL10_minus_one	UNS	A08
224	Sample_11	16	1	0.000784929	27.192	27.192	NA	Sample_11	AI_export_Plate 1 UNS LN_A8_A08_CD4p_Live.fcs	34897_aIL10_-1_UNS	aIL10	34897	minus_one	aIL10_minus_one	UNS	A08
225	Sample_11	17	0	0	NA	NA	NA	Sample_11	AI_export_Plate 1 UNS LN_A8_A08_CD4p_Live.fcs	34897_aIL10_-1_UNS	aIL10	34897	minus_one	aIL10_minus_one	UNS	A08
226	Sample_11	18	2	0.00156986	3.5667	3.5667	0.00292762	Sample_11	AI_export_Plate 1 UNS LN_A8_A08_CD4p_Live.fcs	34897_aIL10_-1_UNS	aIL10	34897	minus_one	aIL10_minus_one	UNS	A08
227	Sample_11	2	115	0.0902669	3.32548	3.1819	2.20198	Sample_11	AI_export_Plate 1 UNS LN_A8_A08_CD4p_Live.fcs	34897_aIL10_-1_UNS	aIL10	34897	minus_one	aIL10_minus_one	UNS	A08
228	Sample_11	3	317	0.248823	9.74554	10.0033	2.11807	Sample_11	AI_export_Plate 1 UNS LN_A8_A08_CD4p_Live.fcs	34897_aIL10_-1_UNS	aIL10	34897	minus_one	aIL10_minus_one	UNS	A08
229	Sample_11	4	118	0.0926217	17.8748	18.5768	3.12608	Sample_11	AI_export_Plate 1 UNS LN_A8_A08_CD4p_Live.fcs	34897_aIL10_-1_UNS	aIL10	34897	minus_one	aIL10_minus_one	UNS	A08
230	Sample_11	5	72	0.0565149	22.7734	22.7177	1.12269	Sample_11	AI_export_Plate 1 UNS LN_A8_A08_CD4p_Live.fcs	34897_aIL10_-1_UNS	aIL10	34897	minus_one	aIL10_minus_one	UNS	A08
231	Sample_11	6	73	0.0572998	5.78766	6.0026	1.16561	Sample_11	AI_export_Plate 1 UNS LN_A8_A08_CD4p_Live.fcs	34897_aIL10_-1_UNS	aIL10	34897	minus_one	aIL10_minus_one	UNS	A08
232	Sample_11	7	24	0.0188383	18.3379	18.92	3.78206	Sample_11	AI_export_Plate 1 UNS LN_A8_A08_CD4p_Live.fcs	34897_aIL10_-1_UNS	aIL10	34897	minus_one	aIL10_minus_one	UNS	A08
233	Sample_11	8	18	0.0141287	26.0143	26.075	0.180522	Sample_11	AI_export_Plate 1 UNS LN_A8_A08_CD4p_Live.fcs	34897_aIL10_-1_UNS	aIL10	34897	minus_one	aIL10_minus_one	UNS	A08
234	Sample_11	9	21	0.0164835	18.5021	23.5609	7.61669	Sample_11	AI_export_Plate 1 UNS LN_A8_A08_CD4p_Live.fcs	34897_aIL10_-1_UNS	aIL10	34897	minus_one	aIL10_minus_one	UNS	A08
235	Sample_110	1	209	0.16405	3.69479	3.63239	2.17257	Sample_110	AI_export_Plate 2 UNS LN_B2_B02_CD4p_Live.fcs	RVc17_aIL10_21_UNS	aIL10	RVc17	twenty_one	aIL10_twenty_one	UNS	B02
236	Sample_110	10	94	0.0737834	15.2723	15.7525	2.10603	Sample_110	AI_export_Plate 2 UNS LN_B2_B02_CD4p_Live.fcs	RVc17_aIL10_21_UNS	aIL10	RVc17	twenty_one	aIL10_twenty_one	UNS	B02
237	Sample_110	11	9	0.00706436	27.1439	27.2855	0.580457	Sample_110	AI_export_Plate 2 UNS LN_B2_B02_CD4p_Live.fcs	RVc17_aIL10_21_UNS	aIL10	RVc17	twenty_one	aIL10_twenty_one	UNS	B02
238	Sample_110	12	1	0.000784929	9.62055	9.62055	NA	Sample_110	AI_export_Plate 2 UNS LN_B2_B02_CD4p_Live.fcs	RVc17_aIL10_21_UNS	aIL10	RVc17	twenty_one	aIL10_twenty_one	UNS	B02
239	Sample_110	13	6	0.00470958	18.0489	17.4779	1.39852	Sample_110	AI_export_Plate 2 UNS LN_B2_B02_CD4p_Live.fcs	RVc17_aIL10_21_UNS	aIL10	RVc17	twenty_one	aIL10_twenty_one	UNS	B02
240	Sample_110	14	0	0	NA	NA	NA	Sample_110	AI_export_Plate 2 UNS LN_B2_B02_CD4p_Live.fcs	RVc17_aIL10_21_UNS	aIL10	RVc17	twenty_one	aIL10_twenty_one	UNS	B02
241	Sample_110	15	1	0.000784929	NA	NA	NA	Sample_110	AI_export_Plate 2 UNS LN_B2_B02_CD4p_Live.fcs	RVc17_aIL10_21_UNS	aIL10	RVc17	twenty_one	aIL10_twenty_one	UNS	B02
242	Sample_110	16	2	0.00156986	27.0851	27.0851	0.0319263	Sample_110	AI_export_Plate 2 UNS LN_B2_B02_CD4p_Live.fcs	RVc17_aIL10_21_UNS	aIL10	RVc17	twenty_one	aIL10_twenty_one	UNS	B02
243	Sample_110	17	2	0.00156986	5.70237	5.70237	NA	Sample_110	AI_export_Plate 2 UNS LN_B2_B02_CD4p_Live.fcs	RVc17_aIL10_21_UNS	aIL10	RVc17	twenty_one	aIL10_twenty_one	UNS	B02
244	Sample_110	18	1	0.000784929	10.7768	10.7768	NA	Sample_110	AI_export_Plate 2 UNS LN_B2_B02_CD4p_Live.fcs	RVc17_aIL10_21_UNS	aIL10	RVc17	twenty_one	aIL10_twenty_one	UNS	B02
245	Sample_110	2	231	0.181319	3.78151	3.56317	1.6644	Sample_110	AI_export_Plate 2 UNS LN_B2_B02_CD4p_Live.fcs	RVc17_aIL10_21_UNS	aIL10	RVc17	twenty_one	aIL10_twenty_one	UNS	B02
246	Sample_110	3	286	0.22449	9.9779	10.1821	2.33604	Sample_110	AI_export_Plate 2 UNS LN_B2_B02_CD4p_Live.fcs	RVc17_aIL10_21_UNS	aIL10	RVc17	twenty_one	aIL10_twenty_one	UNS	B02
247	Sample_110	4	92	0.0722135	18.271	18.6701	3.86888	Sample_110	AI_export_Plate 2 UNS LN_B2_B02_CD4p_Live.fcs	RVc17_aIL10_21_UNS	aIL10	RVc17	twenty_one	aIL10_twenty_one	UNS	B02
248	Sample_110	5	70	0.0549451	22.9559	23.0807	1.55483	Sample_110	AI_export_Plate 2 UNS LN_B2_B02_CD4p_Live.fcs	RVc17_aIL10_21_UNS	aIL10	RVc17	twenty_one	aIL10_twenty_one	UNS	B02
249	Sample_110	6	208	0.163265	5.46047	5.51435	2.11963	Sample_110	AI_export_Plate 2 UNS LN_B2_B02_CD4p_Live.fcs	RVc17_aIL10_21_UNS	aIL10	RVc17	twenty_one	aIL10_twenty_one	UNS	B02
250	Sample_110	7	28	0.021978	14.5733	17.424	7.27872	Sample_110	AI_export_Plate 2 UNS LN_B2_B02_CD4p_Live.fcs	RVc17_aIL10_21_UNS	aIL10	RVc17	twenty_one	aIL10_twenty_one	UNS	B02
251	Sample_110	8	12	0.00941915	25.9433	26.0774	0.34635	Sample_110	AI_export_Plate 2 UNS LN_B2_B02_CD4p_Live.fcs	RVc17_aIL10_21_UNS	aIL10	RVc17	twenty_one	aIL10_twenty_one	UNS	B02
252	Sample_110	9	22	0.0172684	20.2221	23.5609	6.59509	Sample_110	AI_export_Plate 2 UNS LN_B2_B02_CD4p_Live.fcs	RVc17_aIL10_21_UNS	aIL10	RVc17	twenty_one	aIL10_twenty_one	UNS	B02
253	Sample_111	1	219	0.1719	3.41031	3.19391	2.10686	Sample_111	AI_export_Plate 2 UNS LN_B3_B03_CD4p_Live.fcs	RZg17_Control_21_UNS	Control	RZg17	twenty_one	Control_twenty_one	UNS	B03
254	Sample_111	10	155	0.121664	14.6349	14.6009	1.84078	Sample_111	AI_export_Plate 2 UNS LN_B3_B03_CD4p_Live.fcs	RZg17_Control_21_UNS	Control	RZg17	twenty_one	Control_twenty_one	UNS	B03
255	Sample_111	11	7	0.00549451	27.4241	27.5063	0.164531	Sample_111	AI_export_Plate 2 UNS LN_B3_B03_CD4p_Live.fcs	RZg17_Control_21_UNS	Control	RZg17	twenty_one	Control_twenty_one	UNS	B03
256	Sample_111	12	16	0.0125589	9.16905	9.6101	0.898605	Sample_111	AI_export_Plate 2 UNS LN_B3_B03_CD4p_Live.fcs	RZg17_Control_21_UNS	Control	RZg17	twenty_one	Control_twenty_one	UNS	B03
257	Sample_111	13	32	0.0251177	17.9205	17.4779	2.51452	Sample_111	AI_export_Plate 2 UNS LN_B3_B03_CD4p_Live.fcs	RZg17_Control_21_UNS	Control	RZg17	twenty_one	Control_twenty_one	UNS	B03
258	Sample_111	14	0	0	NA	NA	NA	Sample_111	AI_export_Plate 2 UNS LN_B3_B03_CD4p_Live.fcs	RZg17_Control_21_UNS	Control	RZg17	twenty_one	Control_twenty_one	UNS	B03
259	Sample_111	15	1	0.000784929	NA	NA	NA	Sample_111	AI_export_Plate 2 UNS LN_B3_B03_CD4p_Live.fcs	RZg17_Control_21_UNS	Control	RZg17	twenty_one	Control_twenty_one	UNS	B03
260	Sample_111	16	1	0.000784929	27.4207	27.4207	NA	Sample_111	AI_export_Plate 2 UNS LN_B3_B03_CD4p_Live.fcs	RZg17_Control_21_UNS	Control	RZg17	twenty_one	Control_twenty_one	UNS	B03
261	Sample_111	17	1	0.000784929	NA	NA	NA	Sample_111	AI_export_Plate 2 UNS LN_B3_B03_CD4p_Live.fcs	RZg17_Control_21_UNS	Control	RZg17	twenty_one	Control_twenty_one	UNS	B03
262	Sample_111	18	1	0.000784929	3.50685	3.50685	NA	Sample_111	AI_export_Plate 2 UNS LN_B3_B03_CD4p_Live.fcs	RZg17_Control_21_UNS	Control	RZg17	twenty_one	Control_twenty_one	UNS	B03
263	Sample_111	2	172	0.135008	3.47297	3.3043	1.20686	Sample_111	AI_export_Plate 2 UNS LN_B3_B03_CD4p_Live.fcs	RZg17_Control_21_UNS	Control	RZg17	twenty_one	Control_twenty_one	UNS	B03
264	Sample_111	3	303	0.237834	10.1251	10.2393	2.06105	Sample_111	AI_export_Plate 2 UNS LN_B3_B03_CD4p_Live.fcs	RZg17_Control_21_UNS	Control	RZg17	twenty_one	Control_twenty_one	UNS	B03
265	Sample_111	4	84	0.0659341	18.4064	18.5761	3.07104	Sample_111	AI_export_Plate 2 UNS LN_B3_B03_CD4p_Live.fcs	RZg17_Control_21_UNS	Control	RZg17	twenty_one	Control_twenty_one	UNS	B03
266	Sample_111	5	82	0.0643642	23.0005	23.173	2.34322	Sample_111	AI_export_Plate 2 UNS LN_B3_B03_CD4p_Live.fcs	RZg17_Control_21_UNS	Control	RZg17	twenty_one	Control_twenty_one	UNS	B03
267	Sample_111	6	127	0.099686	5.60036	5.71372	2.10705	Sample_111	AI_export_Plate 2 UNS LN_B3_B03_CD4p_Live.fcs	RZg17_Control_21_UNS	Control	RZg17	twenty_one	Control_twenty_one	UNS	B03
268	Sample_111	7	21	0.0164835	18.9522	17.8849	1.58665	Sample_111	AI_export_Plate 2 UNS LN_B3_B03_CD4p_Live.fcs	RZg17_Control_21_UNS	Control	RZg17	twenty_one	Control_twenty_one	UNS	B03
269	Sample_111	8	42	0.032967	25.5119	25.6685	0.49775	Sample_111	AI_export_Plate 2 UNS LN_B3_B03_CD4p_Live.fcs	RZg17_Control_21_UNS	Control	RZg17	twenty_one	Control_twenty_one	UNS	B03
270	Sample_111	9	10	0.00784929	21.7864	23.5609	5.52361	Sample_111	AI_export_Plate 2 UNS LN_B3_B03_CD4p_Live.fcs	RZg17_Control_21_UNS	Control	RZg17	twenty_one	Control_twenty_one	UNS	B03
271	Sample_112	1	248	0.194662	3.31986	3.07481	2.23053	Sample_112	AI_export_Plate 2 UNS LN_B4_B04_CD4p_Live.fcs	34920_aIL10_21_UNS	aIL10	34920	twenty_one	aIL10_twenty_one	UNS	B04
272	Sample_112	10	180	0.141287	14.8454	15.2558	2.26805	Sample_112	AI_export_Plate 2 UNS LN_B4_B04_CD4p_Live.fcs	34920_aIL10_21_UNS	aIL10	34920	twenty_one	aIL10_twenty_one	UNS	B04
273	Sample_112	11	9	0.00706436	27.4498	27.4795	0.127531	Sample_112	AI_export_Plate 2 UNS LN_B4_B04_CD4p_Live.fcs	34920_aIL10_21_UNS	aIL10	34920	twenty_one	aIL10_twenty_one	UNS	B04
274	Sample_112	12	5	0.00392465	8.04102	8.43533	1.94836	Sample_112	AI_export_Plate 2 UNS LN_B4_B04_CD4p_Live.fcs	34920_aIL10_21_UNS	aIL10	34920	twenty_one	aIL10_twenty_one	UNS	B04
275	Sample_112	13	9	0.00706436	18.706	17.4779	1.86292	Sample_112	AI_export_Plate 2 UNS LN_B4_B04_CD4p_Live.fcs	34920_aIL10_21_UNS	aIL10	34920	twenty_one	aIL10_twenty_one	UNS	B04
276	Sample_112	14	0	0	NA	NA	NA	Sample_112	AI_export_Plate 2 UNS LN_B4_B04_CD4p_Live.fcs	34920_aIL10_21_UNS	aIL10	34920	twenty_one	aIL10_twenty_one	UNS	B04
277	Sample_112	15	2	0.00156986	0.641398	0.641398	NA	Sample_112	AI_export_Plate 2 UNS LN_B4_B04_CD4p_Live.fcs	34920_aIL10_21_UNS	aIL10	34920	twenty_one	aIL10_twenty_one	UNS	B04
278	Sample_112	16	0	0	NA	NA	NA	Sample_112	AI_export_Plate 2 UNS LN_B4_B04_CD4p_Live.fcs	34920_aIL10_21_UNS	aIL10	34920	twenty_one	aIL10_twenty_one	UNS	B04
279	Sample_112	17	1	0.000784929	NA	NA	NA	Sample_112	AI_export_Plate 2 UNS LN_B4_B04_CD4p_Live.fcs	34920_aIL10_21_UNS	aIL10	34920	twenty_one	aIL10_twenty_one	UNS	B04
280	Sample_112	18	0	0	NA	NA	NA	Sample_112	AI_export_Plate 2 UNS LN_B4_B04_CD4p_Live.fcs	34920_aIL10_21_UNS	aIL10	34920	twenty_one	aIL10_twenty_one	UNS	B04
281	Sample_112	2	289	0.226845	3.91188	3.35686	2.3741	Sample_112	AI_export_Plate 2 UNS LN_B4_B04_CD4p_Live.fcs	34920_aIL10_21_UNS	aIL10	34920	twenty_one	aIL10_twenty_one	UNS	B04
282	Sample_112	3	177	0.138932	9.71482	10.0831	1.84848	Sample_112	AI_export_Plate 2 UNS LN_B4_B04_CD4p_Live.fcs	34920_aIL10_21_UNS	aIL10	34920	twenty_one	aIL10_twenty_one	UNS	B04
283	Sample_112	4	67	0.0525903	19.446	20.0769	3.61479	Sample_112	AI_export_Plate 2 UNS LN_B4_B04_CD4p_Live.fcs	34920_aIL10_21_UNS	aIL10	34920	twenty_one	aIL10_twenty_one	UNS	B04
284	Sample_112	5	63	0.0494505	23.0685	22.9438	0.868068	Sample_112	AI_export_Plate 2 UNS LN_B4_B04_CD4p_Live.fcs	34920_aIL10_21_UNS	aIL10	34920	twenty_one	aIL10_twenty_one	UNS	B04
285	Sample_112	6	157	0.123234	5.28628	5.39325	1.15968	Sample_112	AI_export_Plate 2 UNS LN_B4_B04_CD4p_Live.fcs	34920_aIL10_21_UNS	aIL10	34920	twenty_one	aIL10_twenty_one	UNS	B04
286	Sample_112	7	31	0.0243328	18.1518	18.0977	3.68663	Sample_112	AI_export_Plate 2 UNS LN_B4_B04_CD4p_Live.fcs	34920_aIL10_21_UNS	aIL10	34920	twenty_one	aIL10_twenty_one	UNS	B04
287	Sample_112	8	15	0.0117739	25.3798	25.6705	1.17667	Sample_112	AI_export_Plate 2 UNS LN_B4_B04_CD4p_Live.fcs	34920_aIL10_21_UNS	aIL10	34920	twenty_one	aIL10_twenty_one	UNS	B04
288	Sample_112	9	21	0.0164835	19.2791	23.5609	7.06274	Sample_112	AI_export_Plate 2 UNS LN_B4_B04_CD4p_Live.fcs	34920_aIL10_21_UNS	aIL10	34920	twenty_one	aIL10_twenty_one	UNS	B04
289	Sample_113	1	389	0.305338	3.68087	3.52876	2.5174	Sample_113	AI_export_Plate 2 UNS LN_B5_B05_CD4p_Live.fcs	34930_aIL10_21_UNS	aIL10	34930	twenty_one	aIL10_twenty_one	UNS	B05
290	Sample_113	10	58	0.0455259	14.463	14.6009	2.16686	Sample_113	AI_export_Plate 2 UNS LN_B5_B05_CD4p_Live.fcs	34930_aIL10_21_UNS	aIL10	34930	twenty_one	aIL10_twenty_one	UNS	B05
291	Sample_113	11	28	0.021978	27.3715	27.3899	0.270809	Sample_113	AI_export_Plate 2 UNS LN_B5_B05_CD4p_Live.fcs	34930_aIL10_21_UNS	aIL10	34930	twenty_one	aIL10_twenty_one	UNS	B05
292	Sample_113	12	18	0.0141287	8.74294	9.46464	1.02804	Sample_113	AI_export_Plate 2 UNS LN_B5_B05_CD4p_Live.fcs	34930_aIL10_21_UNS	aIL10	34930	twenty_one	aIL10_twenty_one	UNS	B05
293	Sample_113	13	35	0.0274725	18.0176	17.4779	3.27452	Sample_113	AI_export_Plate 2 UNS LN_B5_B05_CD4p_Live.fcs	34930_aIL10_21_UNS	aIL10	34930	twenty_one	aIL10_twenty_one	UNS	B05
294	Sample_113	14	2	0.00156986	26.6725	26.6725	NA	Sample_113	AI_export_Plate 2 UNS LN_B5_B05_CD4p_Live.fcs	34930_aIL10_21_UNS	aIL10	34930	twenty_one	aIL10_twenty_one	UNS	B05
295	Sample_113	15	0	0	NA	NA	NA	Sample_113	AI_export_Plate 2 UNS LN_B5_B05_CD4p_Live.fcs	34930_aIL10_21_UNS	aIL10	34930	twenty_one	aIL10_twenty_one	UNS	B05
296	Sample_113	16	1	0.000784929	27.27	27.27	NA	Sample_113	AI_export_Plate 2 UNS LN_B5_B05_CD4p_Live.fcs	34930_aIL10_21_UNS	aIL10	34930	twenty_one	aIL10_twenty_one	UNS	B05
297	Sample_113	17	0	0	NA	NA	NA	Sample_113	AI_export_Plate 2 UNS LN_B5_B05_CD4p_Live.fcs	34930_aIL10_21_UNS	aIL10	34930	twenty_one	aIL10_twenty_one	UNS	B05
298	Sample_113	18	1	0.000784929	3.59747	3.59747	NA	Sample_113	AI_export_Plate 2 UNS LN_B5_B05_CD4p_Live.fcs	34930_aIL10_21_UNS	aIL10	34930	twenty_one	aIL10_twenty_one	UNS	B05
299	Sample_113	2	193	0.151491	3.47404	3.20649	1.58779	Sample_113	AI_export_Plate 2 UNS LN_B5_B05_CD4p_Live.fcs	34930_aIL10_21_UNS	aIL10	34930	twenty_one	aIL10_twenty_one	UNS	B05
300	Sample_113	3	102	0.0800628	9.48329	9.53259	2.79332	Sample_113	AI_export_Plate 2 UNS LN_B5_B05_CD4p_Live.fcs	34930_aIL10_21_UNS	aIL10	34930	twenty_one	aIL10_twenty_one	UNS	B05
301	Sample_113	4	53	0.0416013	19.11	19.8017	3.69499	Sample_113	AI_export_Plate 2 UNS LN_B5_B05_CD4p_Live.fcs	34930_aIL10_21_UNS	aIL10	34930	twenty_one	aIL10_twenty_one	UNS	B05
302	Sample_113	5	52	0.0408163	23.5123	23.7852	0.790994	Sample_113	AI_export_Plate 2 UNS LN_B5_B05_CD4p_Live.fcs	34930_aIL10_21_UNS	aIL10	34930	twenty_one	aIL10_twenty_one	UNS	B05
303	Sample_113	6	198	0.155416	5.76518	5.88403	2.12371	Sample_113	AI_export_Plate 2 UNS LN_B5_B05_CD4p_Live.fcs	34930_aIL10_21_UNS	aIL10	34930	twenty_one	aIL10_twenty_one	UNS	B05
304	Sample_113	7	49	0.0384615	18.1227	18.3737	4.16901	Sample_113	AI_export_Plate 2 UNS LN_B5_B05_CD4p_Live.fcs	34930_aIL10_21_UNS	aIL10	34930	twenty_one	aIL10_twenty_one	UNS	B05
305	Sample_113	8	78	0.0612245	25.6598	25.7814	0.621895	Sample_113	AI_export_Plate 2 UNS LN_B5_B05_CD4p_Live.fcs	34930_aIL10_21_UNS	aIL10	34930	twenty_one	aIL10_twenty_one	UNS	B05
306	Sample_113	9	17	0.0133438	22.0632	23.5609	4.29351	Sample_113	AI_export_Plate 2 UNS LN_B5_B05_CD4p_Live.fcs	34930_aIL10_21_UNS	aIL10	34930	twenty_one	aIL10_twenty_one	UNS	B05
307	Sample_114	1	316	0.248038	4.26915	4.42195	2.55606	Sample_114	AI_export_Plate 2 UNS LN_B6_B06_CD4p_Live.fcs	REq17_Control_21_UNS	Control	REq17	twenty_one	Control_twenty_one	UNS	B06
308	Sample_114	10	124	0.0973312	14.7223	14.8184	1.73227	Sample_114	AI_export_Plate 2 UNS LN_B6_B06_CD4p_Live.fcs	REq17_Control_21_UNS	Control	REq17	twenty_one	Control_twenty_one	UNS	B06
309	Sample_114	11	20	0.0156986	26.6369	27.512	3.23038	Sample_114	AI_export_Plate 2 UNS LN_B6_B06_CD4p_Live.fcs	REq17_Control_21_UNS	Control	REq17	twenty_one	Control_twenty_one	UNS	B06
310	Sample_114	12	4	0.00313972	9.07961	9.61245	1.0962	Sample_114	AI_export_Plate 2 UNS LN_B6_B06_CD4p_Live.fcs	REq17_Control_21_UNS	Control	REq17	twenty_one	Control_twenty_one	UNS	B06
311	Sample_114	13	17	0.0133438	17.1686	17.4779	3.16617	Sample_114	AI_export_Plate 2 UNS LN_B6_B06_CD4p_Live.fcs	REq17_Control_21_UNS	Control	REq17	twenty_one	Control_twenty_one	UNS	B06
312	Sample_114	14	0	0	NA	NA	NA	Sample_114	AI_export_Plate 2 UNS LN_B6_B06_CD4p_Live.fcs	REq17_Control_21_UNS	Control	REq17	twenty_one	Control_twenty_one	UNS	B06
313	Sample_114	15	0	0	NA	NA	NA	Sample_114	AI_export_Plate 2 UNS LN_B6_B06_CD4p_Live.fcs	REq17_Control_21_UNS	Control	REq17	twenty_one	Control_twenty_one	UNS	B06
314	Sample_114	16	1	0.000784929	26.8436	26.8436	NA	Sample_114	AI_export_Plate 2 UNS LN_B6_B06_CD4p_Live.fcs	REq17_Control_21_UNS	Control	REq17	twenty_one	Control_twenty_one	UNS	B06
315	Sample_114	17	0	0	NA	NA	NA	Sample_114	AI_export_Plate 2 UNS LN_B6_B06_CD4p_Live.fcs	REq17_Control_21_UNS	Control	REq17	twenty_one	Control_twenty_one	UNS	B06
316	Sample_114	18	0	0	NA	NA	NA	Sample_114	AI_export_Plate 2 UNS LN_B6_B06_CD4p_Live.fcs	REq17_Control_21_UNS	Control	REq17	twenty_one	Control_twenty_one	UNS	B06
317	Sample_114	2	208	0.163265	3.45127	3.24563	1.47009	Sample_114	AI_export_Plate 2 UNS LN_B6_B06_CD4p_Live.fcs	REq17_Control_21_UNS	Control	REq17	twenty_one	Control_twenty_one	UNS	B06
318	Sample_114	3	183	0.143642	9.79469	9.88858	2.28711	Sample_114	AI_export_Plate 2 UNS LN_B6_B06_CD4p_Live.fcs	REq17_Control_21_UNS	Control	REq17	twenty_one	Control_twenty_one	UNS	B06
319	Sample_114	4	108	0.0847724	19.3995	19.4819	2.8416	Sample_114	AI_export_Plate 2 UNS LN_B6_B06_CD4p_Live.fcs	REq17_Control_21_UNS	Control	REq17	twenty_one	Control_twenty_one	UNS	B06
320	Sample_114	5	42	0.032967	23.3711	23.5236	0.762398	Sample_114	AI_export_Plate 2 UNS LN_B6_B06_CD4p_Live.fcs	REq17_Control_21_UNS	Control	REq17	twenty_one	Control_twenty_one	UNS	B06
321	Sample_114	6	200	0.156986	5.45257	5.64732	1.27124	Sample_114	AI_export_Plate 2 UNS LN_B6_B06_CD4p_Live.fcs	REq17_Control_21_UNS	Control	REq17	twenty_one	Control_twenty_one	UNS	B06
322	Sample_114	7	22	0.0172684	18.2142	18.2938	3.58406	Sample_114	AI_export_Plate 2 UNS LN_B6_B06_CD4p_Live.fcs	REq17_Control_21_UNS	Control	REq17	twenty_one	Control_twenty_one	UNS	B06
323	Sample_114	8	16	0.0125589	25.7415	25.7923	0.536872	Sample_114	AI_export_Plate 2 UNS LN_B6_B06_CD4p_Live.fcs	REq17_Control_21_UNS	Control	REq17	twenty_one	Control_twenty_one	UNS	B06
324	Sample_114	9	13	0.0102041	20.8954	23.5609	6.45153	Sample_114	AI_export_Plate 2 UNS LN_B6_B06_CD4p_Live.fcs	REq17_Control_21_UNS	Control	REq17	twenty_one	Control_twenty_one	UNS	B06
325	Sample_115	1	207	0.16248	4.28082	4.39509	2.87335	Sample_115	AI_export_Plate 2 UNS LN_B7_B07_CD4p_Live.fcs	RVi17_Control_21_UNS	Control	RVi17	twenty_one	Control_twenty_one	UNS	B07
326	Sample_115	10	110	0.0863422	15.1511	15.2772	1.6917	Sample_115	AI_export_Plate 2 UNS LN_B7_B07_CD4p_Live.fcs	RVi17_Control_21_UNS	Control	RVi17	twenty_one	Control_twenty_one	UNS	B07
327	Sample_115	11	26	0.0204082	27.3572	27.4349	0.266478	Sample_115	AI_export_Plate 2 UNS LN_B7_B07_CD4p_Live.fcs	RVi17_Control_21_UNS	Control	RVi17	twenty_one	Control_twenty_one	UNS	B07
328	Sample_115	12	15	0.0117739	10.3908	9.61245	4.73186	Sample_115	AI_export_Plate 2 UNS LN_B7_B07_CD4p_Live.fcs	RVi17_Control_21_UNS	Control	RVi17	twenty_one	Control_twenty_one	UNS	B07
329	Sample_115	13	10	0.00784929	18.6192	17.4779	1.86673	Sample_115	AI_export_Plate 2 UNS LN_B7_B07_CD4p_Live.fcs	RVi17_Control_21_UNS	Control	RVi17	twenty_one	Control_twenty_one	UNS	B07
330	Sample_115	14	1	0.000784929	NA	NA	NA	Sample_115	AI_export_Plate 2 UNS LN_B7_B07_CD4p_Live.fcs	RVi17_Control_21_UNS	Control	RVi17	twenty_one	Control_twenty_one	UNS	B07
331	Sample_115	15	0	0	NA	NA	NA	Sample_115	AI_export_Plate 2 UNS LN_B7_B07_CD4p_Live.fcs	RVi17_Control_21_UNS	Control	RVi17	twenty_one	Control_twenty_one	UNS	B07
332	Sample_115	16	3	0.00235479	27.136	27.2096	0.264404	Sample_115	AI_export_Plate 2 UNS LN_B7_B07_CD4p_Live.fcs	RVi17_Control_21_UNS	Control	RVi17	twenty_one	Control_twenty_one	UNS	B07
333	Sample_115	17	0	0	NA	NA	NA	Sample_115	AI_export_Plate 2 UNS LN_B7_B07_CD4p_Live.fcs	RVi17_Control_21_UNS	Control	RVi17	twenty_one	Control_twenty_one	UNS	B07
334	Sample_115	18	2	0.00156986	3.56317	3.56317	NA	Sample_115	AI_export_Plate 2 UNS LN_B7_B07_CD4p_Live.fcs	RVi17_Control_21_UNS	Control	RVi17	twenty_one	Control_twenty_one	UNS	B07
335	Sample_115	2	162	0.127159	3.78925	3.56317	1.99209	Sample_115	AI_export_Plate 2 UNS LN_B7_B07_CD4p_Live.fcs	RVi17_Control_21_UNS	Control	RVi17	twenty_one	Control_twenty_one	UNS	B07
336	Sample_115	3	187	0.146782	9.50311	9.45963	2.11721	Sample_115	AI_export_Plate 2 UNS LN_B7_B07_CD4p_Live.fcs	RVi17_Control_21_UNS	Control	RVi17	twenty_one	Control_twenty_one	UNS	B07
337	Sample_115	4	123	0.0965463	18.6484	18.5937	2.74355	Sample_115	AI_export_Plate 2 UNS LN_B7_B07_CD4p_Live.fcs	RVi17_Control_21_UNS	Control	RVi17	twenty_one	Control_twenty_one	UNS	B07
338	Sample_115	5	46	0.0361068	22.7019	23.3019	3.09461	Sample_115	AI_export_Plate 2 UNS LN_B7_B07_CD4p_Live.fcs	RVi17_Control_21_UNS	Control	RVi17	twenty_one	Control_twenty_one	UNS	B07
339	Sample_115	6	201	0.157771	5.54055	5.64732	2.05534	Sample_115	AI_export_Plate 2 UNS LN_B7_B07_CD4p_Live.fcs	RVi17_Control_21_UNS	Control	RVi17	twenty_one	Control_twenty_one	UNS	B07
340	Sample_115	7	59	0.0463108	18.4445	18.2959	4.08747	Sample_115	AI_export_Plate 2 UNS LN_B7_B07_CD4p_Live.fcs	RVi17_Control_21_UNS	Control	RVi17	twenty_one	Control_twenty_one	UNS	B07
341	Sample_115	8	75	0.0588697	25.757	25.8885	0.975646	Sample_115	AI_export_Plate 2 UNS LN_B7_B07_CD4p_Live.fcs	RVi17_Control_21_UNS	Control	RVi17	twenty_one	Control_twenty_one	UNS	B07
342	Sample_115	9	47	0.0368917	20.0824	23.5609	6.73123	Sample_115	AI_export_Plate 2 UNS LN_B7_B07_CD4p_Live.fcs	RVi17_Control_21_UNS	Control	RVi17	twenty_one	Control_twenty_one	UNS	B07
343	Sample_116	1	215	0.16876	2.6672	1.64825	2.70024	Sample_116	AI_export_Plate 2 UNS LN_B8_B08_CD4p_Live.fcs	RWs17_aIL10+aPD1_21_UNS	aIL10+aPD1	RWs17	twenty_one	aIL10+aPD1_twenty_one	UNS	B08
344	Sample_116	10	185	0.145212	15.284	15.8376	1.8735	Sample_116	AI_export_Plate 2 UNS LN_B8_B08_CD4p_Live.fcs	RWs17_aIL10+aPD1_21_UNS	aIL10+aPD1	RWs17	twenty_one	aIL10+aPD1_twenty_one	UNS	B08
345	Sample_116	11	35	0.0274725	27.0233	27.557	1.8179	Sample_116	AI_export_Plate 2 UNS LN_B8_B08_CD4p_Live.fcs	RWs17_aIL10+aPD1_21_UNS	aIL10+aPD1	RWs17	twenty_one	aIL10+aPD1_twenty_one	UNS	B08
346	Sample_116	12	20	0.0156986	10.3742	9.61245	3.88034	Sample_116	AI_export_Plate 2 UNS LN_B8_B08_CD4p_Live.fcs	RWs17_aIL10+aPD1_21_UNS	aIL10+aPD1	RWs17	twenty_one	aIL10+aPD1_twenty_one	UNS	B08
347	Sample_116	13	15	0.0117739	18.0963	17.4779	1.39781	Sample_116	AI_export_Plate 2 UNS LN_B8_B08_CD4p_Live.fcs	RWs17_aIL10+aPD1_21_UNS	aIL10+aPD1	RWs17	twenty_one	aIL10+aPD1_twenty_one	UNS	B08
348	Sample_116	14	0	0	NA	NA	NA	Sample_116	AI_export_Plate 2 UNS LN_B8_B08_CD4p_Live.fcs	RWs17_aIL10+aPD1_21_UNS	aIL10+aPD1	RWs17	twenty_one	aIL10+aPD1_twenty_one	UNS	B08
349	Sample_116	15	2	0.00156986	NA	NA	NA	Sample_116	AI_export_Plate 2 UNS LN_B8_B08_CD4p_Live.fcs	RWs17_aIL10+aPD1_21_UNS	aIL10+aPD1	RWs17	twenty_one	aIL10+aPD1_twenty_one	UNS	B08
350	Sample_116	16	0	0	NA	NA	NA	Sample_116	AI_export_Plate 2 UNS LN_B8_B08_CD4p_Live.fcs	RWs17_aIL10+aPD1_21_UNS	aIL10+aPD1	RWs17	twenty_one	aIL10+aPD1_twenty_one	UNS	B08
351	Sample_116	17	0	0	NA	NA	NA	Sample_116	AI_export_Plate 2 UNS LN_B8_B08_CD4p_Live.fcs	RWs17_aIL10+aPD1_21_UNS	aIL10+aPD1	RWs17	twenty_one	aIL10+aPD1_twenty_one	UNS	B08
352	Sample_116	18	1	0.000784929	NA	NA	NA	Sample_116	AI_export_Plate 2 UNS LN_B8_B08_CD4p_Live.fcs	RWs17_aIL10+aPD1_21_UNS	aIL10+aPD1	RWs17	twenty_one	aIL10+aPD1_twenty_one	UNS	B08
353	Sample_116	2	351	0.27551	3.09449	2.90603	1.9854	Sample_116	AI_export_Plate 2 UNS LN_B8_B08_CD4p_Live.fcs	RWs17_aIL10+aPD1_21_UNS	aIL10+aPD1	RWs17	twenty_one	aIL10+aPD1_twenty_one	UNS	B08
354	Sample_116	3	154	0.120879	10.1038	10.246	2.41719	Sample_116	AI_export_Plate 2 UNS LN_B8_B08_CD4p_Live.fcs	RWs17_aIL10+aPD1_21_UNS	aIL10+aPD1	RWs17	twenty_one	aIL10+aPD1_twenty_one	UNS	B08
355	Sample_116	4	103	0.0808477	18.1826	18.6029	3.94129	Sample_116	AI_export_Plate 2 UNS LN_B8_B08_CD4p_Live.fcs	RWs17_aIL10+aPD1_21_UNS	aIL10+aPD1	RWs17	twenty_one	aIL10+aPD1_twenty_one	UNS	B08
356	Sample_116	5	56	0.043956	22.4528	22.8421	2.35855	Sample_116	AI_export_Plate 2 UNS LN_B8_B08_CD4p_Live.fcs	RWs17_aIL10+aPD1_21_UNS	aIL10+aPD1	RWs17	twenty_one	aIL10+aPD1_twenty_one	UNS	B08
357	Sample_116	6	90	0.0706436	5.78253	6.31557	1.72388	Sample_116	AI_export_Plate 2 UNS LN_B8_B08_CD4p_Live.fcs	RWs17_aIL10+aPD1_21_UNS	aIL10+aPD1	RWs17	twenty_one	aIL10+aPD1_twenty_one	UNS	B08
358	Sample_116	7	26	0.0204082	17.28	18.0812	4.5775	Sample_116	AI_export_Plate 2 UNS LN_B8_B08_CD4p_Live.fcs	RWs17_aIL10+aPD1_21_UNS	aIL10+aPD1	RWs17	twenty_one	aIL10+aPD1_twenty_one	UNS	B08
359	Sample_116	8	6	0.00470958	25.7431	25.6702	0.378375	Sample_116	AI_export_Plate 2 UNS LN_B8_B08_CD4p_Live.fcs	RWs17_aIL10+aPD1_21_UNS	aIL10+aPD1	RWs17	twenty_one	aIL10+aPD1_twenty_one	UNS	B08
360	Sample_116	9	15	0.0117739	15.167	15.3383	8.64359	Sample_116	AI_export_Plate 2 UNS LN_B8_B08_CD4p_Live.fcs	RWs17_aIL10+aPD1_21_UNS	aIL10+aPD1	RWs17	twenty_one	aIL10+aPD1_twenty_one	UNS	B08
361	Sample_117	1	252	0.197802	3.37668	3.14794	2.43654	Sample_117	AI_export_Plate 2 UNS LN_B9_B09_CD4p_Live.fcs	RZp17_aIL10_21_UNS	aIL10	RZp17	twenty_one	aIL10_twenty_one	UNS	B09
362	Sample_117	10	122	0.0957614	14.8601	15.166	2.21336	Sample_117	AI_export_Plate 2 UNS LN_B9_B09_CD4p_Live.fcs	RZp17_aIL10_21_UNS	aIL10	RZp17	twenty_one	aIL10_twenty_one	UNS	B09
363	Sample_117	11	14	0.010989	27.4105	27.557	0.306204	Sample_117	AI_export_Plate 2 UNS LN_B9_B09_CD4p_Live.fcs	RZp17_aIL10_21_UNS	aIL10	RZp17	twenty_one	aIL10_twenty_one	UNS	B09
364	Sample_117	12	3	0.00235479	9.57061	9.61245	0.0724672	Sample_117	AI_export_Plate 2 UNS LN_B9_B09_CD4p_Live.fcs	RZp17_aIL10_21_UNS	aIL10	RZp17	twenty_one	aIL10_twenty_one	UNS	B09
365	Sample_117	13	23	0.0180534	18.9789	17.4779	2.98243	Sample_117	AI_export_Plate 2 UNS LN_B9_B09_CD4p_Live.fcs	RZp17_aIL10_21_UNS	aIL10	RZp17	twenty_one	aIL10_twenty_one	UNS	B09
366	Sample_117	14	0	0	NA	NA	NA	Sample_117	AI_export_Plate 2 UNS LN_B9_B09_CD4p_Live.fcs	RZp17_aIL10_21_UNS	aIL10	RZp17	twenty_one	aIL10_twenty_one	UNS	B09
367	Sample_117	15	1	0.000784929	NA	NA	NA	Sample_117	AI_export_Plate 2 UNS LN_B9_B09_CD4p_Live.fcs	RZp17_aIL10_21_UNS	aIL10	RZp17	twenty_one	aIL10_twenty_one	UNS	B09
368	Sample_117	16	0	0	NA	NA	NA	Sample_117	AI_export_Plate 2 UNS LN_B9_B09_CD4p_Live.fcs	RZp17_aIL10_21_UNS	aIL10	RZp17	twenty_one	aIL10_twenty_one	UNS	B09
369	Sample_117	17	1	0.000784929	NA	NA	NA	Sample_117	AI_export_Plate 2 UNS LN_B9_B09_CD4p_Live.fcs	RZp17_aIL10_21_UNS	aIL10	RZp17	twenty_one	aIL10_twenty_one	UNS	B09
370	Sample_117	18	2	0.00156986	3.61433	3.61433	0.0302503	Sample_117	AI_export_Plate 2 UNS LN_B9_B09_CD4p_Live.fcs	RZp17_aIL10_21_UNS	aIL10	RZp17	twenty_one	aIL10_twenty_one	UNS	B09
371	Sample_117	2	262	0.205651	3.43441	3.08888	1.81016	Sample_117	AI_export_Plate 2 UNS LN_B9_B09_CD4p_Live.fcs	RZp17_aIL10_21_UNS	aIL10	RZp17	twenty_one	aIL10_twenty_one	UNS	B09
372	Sample_117	3	208	0.163265	9.53294	9.77731	2.18196	Sample_117	AI_export_Plate 2 UNS LN_B9_B09_CD4p_Live.fcs	RZp17_aIL10_21_UNS	aIL10	RZp17	twenty_one	aIL10_twenty_one	UNS	B09
373	Sample_117	4	143	0.112245	18.3388	19.1825	3.63026	Sample_117	AI_export_Plate 2 UNS LN_B9_B09_CD4p_Live.fcs	RZp17_aIL10_21_UNS	aIL10	RZp17	twenty_one	aIL10_twenty_one	UNS	B09
374	Sample_117	5	70	0.0549451	23.2154	23.3524	0.666293	Sample_117	AI_export_Plate 2 UNS LN_B9_B09_CD4p_Live.fcs	RZp17_aIL10_21_UNS	aIL10	RZp17	twenty_one	aIL10_twenty_one	UNS	B09
375	Sample_117	6	114	0.0894819	5.84213	5.9308	2.61161	Sample_117	AI_export_Plate 2 UNS LN_B9_B09_CD4p_Live.fcs	RZp17_aIL10_21_UNS	aIL10	RZp17	twenty_one	aIL10_twenty_one	UNS	B09
376	Sample_117	7	26	0.0204082	18.5104	18.2849	3.1161	Sample_117	AI_export_Plate 2 UNS LN_B9_B09_CD4p_Live.fcs	RZp17_aIL10_21_UNS	aIL10	RZp17	twenty_one	aIL10_twenty_one	UNS	B09
377	Sample_117	8	13	0.0102041	25.4836	25.6403	0.589247	Sample_117	AI_export_Plate 2 UNS LN_B9_B09_CD4p_Live.fcs	RZp17_aIL10_21_UNS	aIL10	RZp17	twenty_one	aIL10_twenty_one	UNS	B09
378	Sample_117	9	20	0.0156986	18.3868	23.5609	7.59114	Sample_117	AI_export_Plate 2 UNS LN_B9_B09_CD4p_Live.fcs	RZp17_aIL10_21_UNS	aIL10	RZp17	twenty_one	aIL10_twenty_one	UNS	B09
379	Sample_118	1	254	0.199372	3.585	3.56888	2.46342	Sample_118	AI_export_Plate 2 UNS LN_C1_C01_CD4p_Live.fcs	REu17_Control_36_UNS	Control	REu17	thirty_six	Control_thirty_six	UNS	C01
380	Sample_118	10	201	0.157771	14.993	14.8364	1.47647	Sample_118	AI_export_Plate 2 UNS LN_C1_C01_CD4p_Live.fcs	REu17_Control_36_UNS	Control	REu17	thirty_six	Control_thirty_six	UNS	C01
381	Sample_118	11	19	0.0149137	26.1596	27.5132	3.67014	Sample_118	AI_export_Plate 2 UNS LN_C1_C01_CD4p_Live.fcs	REu17_Control_36_UNS	Control	REu17	thirty_six	Control_thirty_six	UNS	C01
382	Sample_118	12	4	0.00313972	8.99751	9.51497	1.11638	Sample_118	AI_export_Plate 2 UNS LN_C1_C01_CD4p_Live.fcs	REu17_Control_36_UNS	Control	REu17	thirty_six	Control_thirty_six	UNS	C01
383	Sample_118	13	18	0.0141287	17.5744	17.4779	0.77397	Sample_118	AI_export_Plate 2 UNS LN_C1_C01_CD4p_Live.fcs	REu17_Control_36_UNS	Control	REu17	thirty_six	Control_thirty_six	UNS	C01
384	Sample_118	14	1	0.000784929	27.342	27.342	NA	Sample_118	AI_export_Plate 2 UNS LN_C1_C01_CD4p_Live.fcs	REu17_Control_36_UNS	Control	REu17	thirty_six	Control_thirty_six	UNS	C01
385	Sample_118	15	1	0.000784929	NA	NA	NA	Sample_118	AI_export_Plate 2 UNS LN_C1_C01_CD4p_Live.fcs	REu17_Control_36_UNS	Control	REu17	thirty_six	Control_thirty_six	UNS	C01
386	Sample_118	16	0	0	NA	NA	NA	Sample_118	AI_export_Plate 2 UNS LN_C1_C01_CD4p_Live.fcs	REu17_Control_36_UNS	Control	REu17	thirty_six	Control_thirty_six	UNS	C01
387	Sample_118	17	2	0.00156986	NA	NA	NA	Sample_118	AI_export_Plate 2 UNS LN_C1_C01_CD4p_Live.fcs	REu17_Control_36_UNS	Control	REu17	thirty_six	Control_thirty_six	UNS	C01
388	Sample_118	18	0	0	NA	NA	NA	Sample_118	AI_export_Plate 2 UNS LN_C1_C01_CD4p_Live.fcs	REu17_Control_36_UNS	Control	REu17	thirty_six	Control_thirty_six	UNS	C01
389	Sample_118	2	164	0.128728	3.8984	3.63408	1.64683	Sample_118	AI_export_Plate 2 UNS LN_C1_C01_CD4p_Live.fcs	REu17_Control_36_UNS	Control	REu17	thirty_six	Control_thirty_six	UNS	C01
390	Sample_118	3	230	0.180534	10.0353	10.065	2.60054	Sample_118	AI_export_Plate 2 UNS LN_C1_C01_CD4p_Live.fcs	REu17_Control_36_UNS	Control	REu17	thirty_six	Control_thirty_six	UNS	C01
391	Sample_118	4	60	0.0470958	18.5334	18.7825	3.87543	Sample_118	AI_export_Plate 2 UNS LN_C1_C01_CD4p_Live.fcs	REu17_Control_36_UNS	Control	REu17	thirty_six	Control_thirty_six	UNS	C01
392	Sample_118	5	95	0.0745683	23.2158	23.3239	1.24623	Sample_118	AI_export_Plate 2 UNS LN_C1_C01_CD4p_Live.fcs	REu17_Control_36_UNS	Control	REu17	thirty_six	Control_thirty_six	UNS	C01
393	Sample_118	6	147	0.115385	5.40368	5.46209	2.25793	Sample_118	AI_export_Plate 2 UNS LN_C1_C01_CD4p_Live.fcs	REu17_Control_36_UNS	Control	REu17	thirty_six	Control_thirty_six	UNS	C01
394	Sample_118	7	32	0.0251177	18.9872	20.1574	2.25666	Sample_118	AI_export_Plate 2 UNS LN_C1_C01_CD4p_Live.fcs	REu17_Control_36_UNS	Control	REu17	thirty_six	Control_thirty_six	UNS	C01
395	Sample_118	8	33	0.0259027	25.3657	25.5048	0.491517	Sample_118	AI_export_Plate 2 UNS LN_C1_C01_CD4p_Live.fcs	REu17_Control_36_UNS	Control	REu17	thirty_six	Control_thirty_six	UNS	C01
396	Sample_118	9	13	0.0102041	19.8113	23.3095	6.07276	Sample_118	AI_export_Plate 2 UNS LN_C1_C01_CD4p_Live.fcs	REu17_Control_36_UNS	Control	REu17	thirty_six	Control_thirty_six	UNS	C01
397	Sample_119	1	217	0.17033	2.74858	2.35701	2.32128	Sample_119	AI_export_Plate 2 UNS LN_C10_C10_CD4p_Live.fcs	RZp17_aIL10_36_UNS	aIL10	RZp17	thirty_six	aIL10_thirty_six	UNS	C10
398	Sample_119	10	171	0.134223	14.8838	14.6009	1.61799	Sample_119	AI_export_Plate 2 UNS LN_C10_C10_CD4p_Live.fcs	RZp17_aIL10_36_UNS	aIL10	RZp17	thirty_six	aIL10_thirty_six	UNS	C10
399	Sample_119	11	14	0.010989	27.209	27.2748	0.317513	Sample_119	AI_export_Plate 2 UNS LN_C10_C10_CD4p_Live.fcs	RZp17_aIL10_36_UNS	aIL10	RZp17	thirty_six	aIL10_thirty_six	UNS	C10
400	Sample_119	12	10	0.00784929	9.40768	9.61245	0.590852	Sample_119	AI_export_Plate 2 UNS LN_C10_C10_CD4p_Live.fcs	RZp17_aIL10_36_UNS	aIL10	RZp17	thirty_six	aIL10_thirty_six	UNS	C10
401	Sample_119	13	15	0.0117739	16.9044	17.4779	3.75419	Sample_119	AI_export_Plate 2 UNS LN_C10_C10_CD4p_Live.fcs	RZp17_aIL10_36_UNS	aIL10	RZp17	thirty_six	aIL10_thirty_six	UNS	C10
402	Sample_119	14	0	0	NA	NA	NA	Sample_119	AI_export_Plate 2 UNS LN_C10_C10_CD4p_Live.fcs	RZp17_aIL10_36_UNS	aIL10	RZp17	thirty_six	aIL10_thirty_six	UNS	C10
403	Sample_119	15	1	0.000784929	NA	NA	NA	Sample_119	AI_export_Plate 2 UNS LN_C10_C10_CD4p_Live.fcs	RZp17_aIL10_36_UNS	aIL10	RZp17	thirty_six	aIL10_thirty_six	UNS	C10
404	Sample_119	16	3	0.00235479	26.9894	26.8226	0.289479	Sample_119	AI_export_Plate 2 UNS LN_C10_C10_CD4p_Live.fcs	RZp17_aIL10_36_UNS	aIL10	RZp17	thirty_six	aIL10_thirty_six	UNS	C10
405	Sample_119	17	2	0.00156986	13.2271	13.2271	NA	Sample_119	AI_export_Plate 2 UNS LN_C10_C10_CD4p_Live.fcs	RZp17_aIL10_36_UNS	aIL10	RZp17	thirty_six	aIL10_thirty_six	UNS	C10
406	Sample_119	18	1	0.000784929	NA	NA	NA	Sample_119	AI_export_Plate 2 UNS LN_C10_C10_CD4p_Live.fcs	RZp17_aIL10_36_UNS	aIL10	RZp17	thirty_six	aIL10_thirty_six	UNS	C10
407	Sample_119	2	240	0.188383	3.46166	3.12295	2.08298	Sample_119	AI_export_Plate 2 UNS LN_C10_C10_CD4p_Live.fcs	RZp17_aIL10_36_UNS	aIL10	RZp17	thirty_six	aIL10_thirty_six	UNS	C10
408	Sample_119	3	311	0.244113	9.87139	10.0033	2.35727	Sample_119	AI_export_Plate 2 UNS LN_C10_C10_CD4p_Live.fcs	RZp17_aIL10_36_UNS	aIL10	RZp17	thirty_six	aIL10_thirty_six	UNS	C10
409	Sample_119	4	81	0.0635793	19.0086	19.3719	3.50197	Sample_119	AI_export_Plate 2 UNS LN_C10_C10_CD4p_Live.fcs	RZp17_aIL10_36_UNS	aIL10	RZp17	thirty_six	aIL10_thirty_six	UNS	C10
410	Sample_119	5	75	0.0588697	23.0545	23.424	1.74499	Sample_119	AI_export_Plate 2 UNS LN_C10_C10_CD4p_Live.fcs	RZp17_aIL10_36_UNS	aIL10	RZp17	thirty_six	aIL10_thirty_six	UNS	C10
411	Sample_119	6	55	0.0431711	6.02576	5.64732	3.57994	Sample_119	AI_export_Plate 2 UNS LN_C10_C10_CD4p_Live.fcs	RZp17_aIL10_36_UNS	aIL10	RZp17	thirty_six	aIL10_thirty_six	UNS	C10
412	Sample_119	7	28	0.021978	19.4744	20.1743	1.67267	Sample_119	AI_export_Plate 2 UNS LN_C10_C10_CD4p_Live.fcs	RZp17_aIL10_36_UNS	aIL10	RZp17	thirty_six	aIL10_thirty_six	UNS	C10
413	Sample_119	8	22	0.0172684	25.7279	25.8112	0.53759	Sample_119	AI_export_Plate 2 UNS LN_C10_C10_CD4p_Live.fcs	RZp17_aIL10_36_UNS	aIL10	RZp17	thirty_six	aIL10_thirty_six	UNS	C10
414	Sample_119	9	28	0.021978	17.8604	23.4352	7.61799	Sample_119	AI_export_Plate 2 UNS LN_C10_C10_CD4p_Live.fcs	RZp17_aIL10_36_UNS	aIL10	RZp17	thirty_six	aIL10_thirty_six	UNS	C10
415	Sample_12	1	212	0.166405	4.02197	4.15774	2.35629	Sample_12	AI_export_Plate 1 UNS LN_A9_A09_CD4p_Live.fcs	RRh17_aIL10+aPD1_-1_UNS	aIL10+aPD1	RRh17	minus_one	aIL10+aPD1_minus_one	UNS	A09
416	Sample_12	10	268	0.210361	15.1109	15.5414	1.78576	Sample_12	AI_export_Plate 1 UNS LN_A9_A09_CD4p_Live.fcs	RRh17_aIL10+aPD1_-1_UNS	aIL10+aPD1	RRh17	minus_one	aIL10+aPD1_minus_one	UNS	A09
417	Sample_12	11	15	0.0117739	27.3774	27.557	0.378546	Sample_12	AI_export_Plate 1 UNS LN_A9_A09_CD4p_Live.fcs	RRh17_aIL10+aPD1_-1_UNS	aIL10+aPD1	RRh17	minus_one	aIL10+aPD1_minus_one	UNS	A09
418	Sample_12	12	3	0.00235479	9.37139	9.61245	0.427112	Sample_12	AI_export_Plate 1 UNS LN_A9_A09_CD4p_Live.fcs	RRh17_aIL10+aPD1_-1_UNS	aIL10+aPD1	RRh17	minus_one	aIL10+aPD1_minus_one	UNS	A09
419	Sample_12	13	16	0.0125589	18.2765	17.4779	1.70932	Sample_12	AI_export_Plate 1 UNS LN_A9_A09_CD4p_Live.fcs	RRh17_aIL10+aPD1_-1_UNS	aIL10+aPD1	RRh17	minus_one	aIL10+aPD1_minus_one	UNS	A09
420	Sample_12	14	2	0.00156986	27.342	27.342	4.91847e-09	Sample_12	AI_export_Plate 1 UNS LN_A9_A09_CD4p_Live.fcs	RRh17_aIL10+aPD1_-1_UNS	aIL10+aPD1	RRh17	minus_one	aIL10+aPD1_minus_one	UNS	A09
421	Sample_12	15	0	0	NA	NA	NA	Sample_12	AI_export_Plate 1 UNS LN_A9_A09_CD4p_Live.fcs	RRh17_aIL10+aPD1_-1_UNS	aIL10+aPD1	RRh17	minus_one	aIL10+aPD1_minus_one	UNS	A09
422	Sample_12	16	1	0.000784929	26.6741	26.6741	NA	Sample_12	AI_export_Plate 1 UNS LN_A9_A09_CD4p_Live.fcs	RRh17_aIL10+aPD1_-1_UNS	aIL10+aPD1	RRh17	minus_one	aIL10+aPD1_minus_one	UNS	A09
423	Sample_12	17	1	0.000784929	NA	NA	NA	Sample_12	AI_export_Plate 1 UNS LN_A9_A09_CD4p_Live.fcs	RRh17_aIL10+aPD1_-1_UNS	aIL10+aPD1	RRh17	minus_one	aIL10+aPD1_minus_one	UNS	A09
424	Sample_12	18	0	0	NA	NA	NA	Sample_12	AI_export_Plate 1 UNS LN_A9_A09_CD4p_Live.fcs	RRh17_aIL10+aPD1_-1_UNS	aIL10+aPD1	RRh17	minus_one	aIL10+aPD1_minus_one	UNS	A09
425	Sample_12	2	124	0.0973312	3.42226	3.29271	1.17322	Sample_12	AI_export_Plate 1 UNS LN_A9_A09_CD4p_Live.fcs	RRh17_aIL10+aPD1_-1_UNS	aIL10+aPD1	RRh17	minus_one	aIL10+aPD1_minus_one	UNS	A09
426	Sample_12	3	222	0.174254	9.74552	9.91836	2.17842	Sample_12	AI_export_Plate 1 UNS LN_A9_A09_CD4p_Live.fcs	RRh17_aIL10+aPD1_-1_UNS	aIL10+aPD1	RRh17	minus_one	aIL10+aPD1_minus_one	UNS	A09
427	Sample_12	4	156	0.122449	18.665	18.9904	3.48958	Sample_12	AI_export_Plate 1 UNS LN_A9_A09_CD4p_Live.fcs	RRh17_aIL10+aPD1_-1_UNS	aIL10+aPD1	RRh17	minus_one	aIL10+aPD1_minus_one	UNS	A09
428	Sample_12	5	72	0.0565149	22.8634	22.7177	0.633149	Sample_12	AI_export_Plate 1 UNS LN_A9_A09_CD4p_Live.fcs	RRh17_aIL10+aPD1_-1_UNS	aIL10+aPD1	RRh17	minus_one	aIL10+aPD1_minus_one	UNS	A09
429	Sample_12	6	120	0.0941915	5.55069	5.64732	0.970749	Sample_12	AI_export_Plate 1 UNS LN_A9_A09_CD4p_Live.fcs	RRh17_aIL10+aPD1_-1_UNS	aIL10+aPD1	RRh17	minus_one	aIL10+aPD1_minus_one	UNS	A09
430	Sample_12	7	33	0.0259027	19.1316	20.1172	2.27061	Sample_12	AI_export_Plate 1 UNS LN_A9_A09_CD4p_Live.fcs	RRh17_aIL10+aPD1_-1_UNS	aIL10+aPD1	RRh17	minus_one	aIL10+aPD1_minus_one	UNS	A09
431	Sample_12	8	16	0.0125589	25.9027	26.0595	0.436805	Sample_12	AI_export_Plate 1 UNS LN_A9_A09_CD4p_Live.fcs	RRh17_aIL10+aPD1_-1_UNS	aIL10+aPD1	RRh17	minus_one	aIL10+aPD1_minus_one	UNS	A09
432	Sample_12	9	13	0.0102041	18.575	23.5609	7.78609	Sample_12	AI_export_Plate 1 UNS LN_A9_A09_CD4p_Live.fcs	RRh17_aIL10+aPD1_-1_UNS	aIL10+aPD1	RRh17	minus_one	aIL10+aPD1_minus_one	UNS	A09
433	Sample_120	1	355	0.27865	2.4964	1.88291	2.01573	Sample_120	AI_export_Plate 2 UNS LN_C2_C02_CD4p_export_Plate 2 UNS LN_C2_C02_CD4p_Live.fcs	RKq17_aIL10+aPD1_32_UNS	aIL10+aPD1	RKq17	thirty_six	aIL10+aPD1_32	UNS	C02
434	Sample_120	10	84	0.0659341	14.7066	14.6377	1.7796	Sample_120	AI_export_Plate 2 UNS LN_C2_C02_CD4p_export_Plate 2 UNS LN_C2_C02_CD4p_Live.fcs	RKq17_aIL10+aPD1_32_UNS	aIL10+aPD1	RKq17	thirty_six	aIL10+aPD1_32	UNS	C02
435	Sample_120	11	0	0	NA	NA	NA	Sample_120	AI_export_Plate 2 UNS LN_C2_C02_CD4p_export_Plate 2 UNS LN_C2_C02_CD4p_Live.fcs	RKq17_aIL10+aPD1_32_UNS	aIL10+aPD1	RKq17	thirty_six	aIL10+aPD1_32	UNS	C02
436	Sample_120	12	7	0.00549451	9.55968	9.61245	0.0913238	Sample_120	AI_export_Plate 2 UNS LN_C2_C02_CD4p_export_Plate 2 UNS LN_C2_C02_CD4p_Live.fcs	RKq17_aIL10+aPD1_32_UNS	aIL10+aPD1	RKq17	thirty_six	aIL10+aPD1_32	UNS	C02
437	Sample_120	13	2	0.00156986	17.4779	17.4779	4.91847e-09	Sample_120	AI_export_Plate 2 UNS LN_C2_C02_CD4p_export_Plate 2 UNS LN_C2_C02_CD4p_Live.fcs	RKq17_aIL10+aPD1_32_UNS	aIL10+aPD1	RKq17	thirty_six	aIL10+aPD1_32	UNS	C02
438	Sample_120	14	0	0	NA	NA	NA	Sample_120	AI_export_Plate 2 UNS LN_C2_C02_CD4p_export_Plate 2 UNS LN_C2_C02_CD4p_Live.fcs	RKq17_aIL10+aPD1_32_UNS	aIL10+aPD1	RKq17	thirty_six	aIL10+aPD1_32	UNS	C02
439	Sample_120	15	0	0	NA	NA	NA	Sample_120	AI_export_Plate 2 UNS LN_C2_C02_CD4p_export_Plate 2 UNS LN_C2_C02_CD4p_Live.fcs	RKq17_aIL10+aPD1_32_UNS	aIL10+aPD1	RKq17	thirty_six	aIL10+aPD1_32	UNS	C02
440	Sample_120	16	0	0	NA	NA	NA	Sample_120	AI_export_Plate 2 UNS LN_C2_C02_CD4p_export_Plate 2 UNS LN_C2_C02_CD4p_Live.fcs	RKq17_aIL10+aPD1_32_UNS	aIL10+aPD1	RKq17	thirty_six	aIL10+aPD1_32	UNS	C02
441	Sample_120	17	1	0.000784929	NA	NA	NA	Sample_120	AI_export_Plate 2 UNS LN_C2_C02_CD4p_export_Plate 2 UNS LN_C2_C02_CD4p_Live.fcs	RKq17_aIL10+aPD1_32_UNS	aIL10+aPD1	RKq17	thirty_six	aIL10+aPD1_32	UNS	C02
442	Sample_120	18	1	0.000784929	3.58982	3.58982	NA	Sample_120	AI_export_Plate 2 UNS LN_C2_C02_CD4p_export_Plate 2 UNS LN_C2_C02_CD4p_Live.fcs	RKq17_aIL10+aPD1_32_UNS	aIL10+aPD1	RKq17	thirty_six	aIL10+aPD1_32	UNS	C02
443	Sample_120	2	441	0.346154	3.09982	3.04573	1.71003	Sample_120	AI_export_Plate 2 UNS LN_C2_C02_CD4p_export_Plate 2 UNS LN_C2_C02_CD4p_Live.fcs	RKq17_aIL10+aPD1_32_UNS	aIL10+aPD1	RKq17	thirty_six	aIL10+aPD1_32	UNS	C02
444	Sample_120	3	124	0.0973312	10.1205	10.1002	2.57115	Sample_120	AI_export_Plate 2 UNS LN_C2_C02_CD4p_export_Plate 2 UNS LN_C2_C02_CD4p_Live.fcs	RKq17_aIL10+aPD1_32_UNS	aIL10+aPD1	RKq17	thirty_six	aIL10+aPD1_32	UNS	C02
445	Sample_120	4	65	0.0510204	19.4082	19.9075	3.43344	Sample_120	AI_export_Plate 2 UNS LN_C2_C02_CD4p_export_Plate 2 UNS LN_C2_C02_CD4p_Live.fcs	RKq17_aIL10+aPD1_32_UNS	aIL10+aPD1	RKq17	thirty_six	aIL10+aPD1_32	UNS	C02
446	Sample_120	5	33	0.0259027	22.4265	23.6138	4.57051	Sample_120	AI_export_Plate 2 UNS LN_C2_C02_CD4p_export_Plate 2 UNS LN_C2_C02_CD4p_Live.fcs	RKq17_aIL10+aPD1_32_UNS	aIL10+aPD1	RKq17	thirty_six	aIL10+aPD1_32	UNS	C02
447	Sample_120	6	131	0.102826	5.04278	5.20961	1.52013	Sample_120	AI_export_Plate 2 UNS LN_C2_C02_CD4p_export_Plate 2 UNS LN_C2_C02_CD4p_Live.fcs	RKq17_aIL10+aPD1_32_UNS	aIL10+aPD1	RKq17	thirty_six	aIL10+aPD1_32	UNS	C02
448	Sample_120	7	13	0.0102041	18.7597	20.4357	3.95674	Sample_120	AI_export_Plate 2 UNS LN_C2_C02_CD4p_export_Plate 2 UNS LN_C2_C02_CD4p_Live.fcs	RKq17_aIL10+aPD1_32_UNS	aIL10+aPD1	RKq17	thirty_six	aIL10+aPD1_32	UNS	C02
449	Sample_120	8	11	0.00863422	25.1623	24.9562	0.596611	Sample_120	AI_export_Plate 2 UNS LN_C2_C02_CD4p_export_Plate 2 UNS LN_C2_C02_CD4p_Live.fcs	RKq17_aIL10+aPD1_32_UNS	aIL10+aPD1	RKq17	thirty_six	aIL10+aPD1_32	UNS	C02
450	Sample_120	9	6	0.00470958	17.4588	22.2532	8.38957	Sample_120	AI_export_Plate 2 UNS LN_C2_C02_CD4p_export_Plate 2 UNS LN_C2_C02_CD4p_Live.fcs	RKq17_aIL10+aPD1_32_UNS	aIL10+aPD1	RKq17	thirty_six	aIL10+aPD1_32	UNS	C02
451	Sample_121	1	221	0.173469	3.34049	2.99264	2.60898	Sample_121	AI_export_Plate 2 UNS LN_C3_C03_CD4p_Live.fcs	RVc17_aIL10_36_UNS	aIL10	RVc17	thirty_six	aIL10_thirty_six	UNS	C03
452	Sample_121	10	109	0.0855573	15.0054	15.1872	1.8991	Sample_121	AI_export_Plate 2 UNS LN_C3_C03_CD4p_Live.fcs	RVc17_aIL10_36_UNS	aIL10	RVc17	thirty_six	aIL10_thirty_six	UNS	C03
453	Sample_121	11	3	0.00235479	26.7314	26.357	0.716021	Sample_121	AI_export_Plate 2 UNS LN_C3_C03_CD4p_Live.fcs	RVc17_aIL10_36_UNS	aIL10	RVc17	thirty_six	aIL10_thirty_six	UNS	C03
454	Sample_121	12	9	0.00706436	9.44939	9.51372	0.526723	Sample_121	AI_export_Plate 2 UNS LN_C3_C03_CD4p_Live.fcs	RVc17_aIL10_36_UNS	aIL10	RVc17	thirty_six	aIL10_thirty_six	UNS	C03
455	Sample_121	13	6	0.00470958	18.611	17.4779	1.79663	Sample_121	AI_export_Plate 2 UNS LN_C3_C03_CD4p_Live.fcs	RVc17_aIL10_36_UNS	aIL10	RVc17	thirty_six	aIL10_thirty_six	UNS	C03
456	Sample_121	14	0	0	NA	NA	NA	Sample_121	AI_export_Plate 2 UNS LN_C3_C03_CD4p_Live.fcs	RVc17_aIL10_36_UNS	aIL10	RVc17	thirty_six	aIL10_thirty_six	UNS	C03
457	Sample_121	15	1	0.000784929	NA	NA	NA	Sample_121	AI_export_Plate 2 UNS LN_C3_C03_CD4p_Live.fcs	RVc17_aIL10_36_UNS	aIL10	RVc17	thirty_six	aIL10_thirty_six	UNS	C03
458	Sample_121	16	0	0	NA	NA	NA	Sample_121	AI_export_Plate 2 UNS LN_C3_C03_CD4p_Live.fcs	RVc17_aIL10_36_UNS	aIL10	RVc17	thirty_six	aIL10_thirty_six	UNS	C03
459	Sample_121	17	1	0.000784929	NA	NA	NA	Sample_121	AI_export_Plate 2 UNS LN_C3_C03_CD4p_Live.fcs	RVc17_aIL10_36_UNS	aIL10	RVc17	thirty_six	aIL10_thirty_six	UNS	C03
460	Sample_121	18	0	0	NA	NA	NA	Sample_121	AI_export_Plate 2 UNS LN_C3_C03_CD4p_Live.fcs	RVc17_aIL10_36_UNS	aIL10	RVc17	thirty_six	aIL10_thirty_six	UNS	C03
461	Sample_121	2	355	0.27865	3.56524	3.3013	1.975	Sample_121	AI_export_Plate 2 UNS LN_C3_C03_CD4p_Live.fcs	RVc17_aIL10_36_UNS	aIL10	RVc17	thirty_six	aIL10_thirty_six	UNS	C03
462	Sample_121	3	221	0.173469	10.1387	10.3014	2.25106	Sample_121	AI_export_Plate 2 UNS LN_C3_C03_CD4p_Live.fcs	RVc17_aIL10_36_UNS	aIL10	RVc17	thirty_six	aIL10_thirty_six	UNS	C03
463	Sample_121	4	107	0.0839874	18.4261	19.3378	3.1405	Sample_121	AI_export_Plate 2 UNS LN_C3_C03_CD4p_Live.fcs	RVc17_aIL10_36_UNS	aIL10	RVc17	thirty_six	aIL10_thirty_six	UNS	C03
464	Sample_121	5	120	0.0941915	23.4027	23.7175	1.1458	Sample_121	AI_export_Plate 2 UNS LN_C3_C03_CD4p_Live.fcs	RVc17_aIL10_36_UNS	aIL10	RVc17	thirty_six	aIL10_thirty_six	UNS	C03
465	Sample_121	6	66	0.0518053	5.05103	5.06722	1.41633	Sample_121	AI_export_Plate 2 UNS LN_C3_C03_CD4p_Live.fcs	RVc17_aIL10_36_UNS	aIL10	RVc17	thirty_six	aIL10_thirty_six	UNS	C03
466	Sample_121	7	16	0.0125589	13.5541	17.7519	7.09396	Sample_121	AI_export_Plate 2 UNS LN_C3_C03_CD4p_Live.fcs	RVc17_aIL10_36_UNS	aIL10	RVc17	thirty_six	aIL10_thirty_six	UNS	C03
467	Sample_121	8	30	0.0235479	25.7761	25.8105	0.491349	Sample_121	AI_export_Plate 2 UNS LN_C3_C03_CD4p_Live.fcs	RVc17_aIL10_36_UNS	aIL10	RVc17	thirty_six	aIL10_thirty_six	UNS	C03
468	Sample_121	9	9	0.00706436	20.0126	23.5609	6.89926	Sample_121	AI_export_Plate 2 UNS LN_C3_C03_CD4p_Live.fcs	RVc17_aIL10_36_UNS	aIL10	RVc17	thirty_six	aIL10_thirty_six	UNS	C03
469	Sample_122	1	170	0.133438	3.4878	3.09508	2.5093	Sample_122	AI_export_Plate 2 UNS LN_C4_C04_CD4p_Live.fcs	RZg17_Control_36_UNS	Control	RZg17	thirty_six	Control_thirty_six	UNS	C04
470	Sample_122	10	181	0.142072	14.7514	14.8486	2.12419	Sample_122	AI_export_Plate 2 UNS LN_C4_C04_CD4p_Live.fcs	RZg17_Control_36_UNS	Control	RZg17	thirty_six	Control_thirty_six	UNS	C04
471	Sample_122	11	10	0.00784929	26.1992	27.2342	3.24243	Sample_122	AI_export_Plate 2 UNS LN_C4_C04_CD4p_Live.fcs	RZg17_Control_36_UNS	Control	RZg17	thirty_six	Control_thirty_six	UNS	C04
472	Sample_122	12	9	0.00706436	9.1206	9.61245	0.905526	Sample_122	AI_export_Plate 2 UNS LN_C4_C04_CD4p_Live.fcs	RZg17_Control_36_UNS	Control	RZg17	thirty_six	Control_thirty_six	UNS	C04
473	Sample_122	13	40	0.0313972	17.9594	17.4779	2.15856	Sample_122	AI_export_Plate 2 UNS LN_C4_C04_CD4p_Live.fcs	RZg17_Control_36_UNS	Control	RZg17	thirty_six	Control_thirty_six	UNS	C04
474	Sample_122	14	0	0	NA	NA	NA	Sample_122	AI_export_Plate 2 UNS LN_C4_C04_CD4p_Live.fcs	RZg17_Control_36_UNS	Control	RZg17	thirty_six	Control_thirty_six	UNS	C04
475	Sample_122	15	1	0.000784929	NA	NA	NA	Sample_122	AI_export_Plate 2 UNS LN_C4_C04_CD4p_Live.fcs	RZg17_Control_36_UNS	Control	RZg17	thirty_six	Control_thirty_six	UNS	C04
476	Sample_122	16	0	0	NA	NA	NA	Sample_122	AI_export_Plate 2 UNS LN_C4_C04_CD4p_Live.fcs	RZg17_Control_36_UNS	Control	RZg17	thirty_six	Control_thirty_six	UNS	C04
477	Sample_122	17	2	0.00156986	NA	NA	NA	Sample_122	AI_export_Plate 2 UNS LN_C4_C04_CD4p_Live.fcs	RZg17_Control_36_UNS	Control	RZg17	thirty_six	Control_thirty_six	UNS	C04
478	Sample_122	18	0	0	NA	NA	NA	Sample_122	AI_export_Plate 2 UNS LN_C4_C04_CD4p_Live.fcs	RZg17_Control_36_UNS	Control	RZg17	thirty_six	Control_thirty_six	UNS	C04
479	Sample_122	2	158	0.124019	3.44882	3.12254	1.8002	Sample_122	AI_export_Plate 2 UNS LN_C4_C04_CD4p_Live.fcs	RZg17_Control_36_UNS	Control	RZg17	thirty_six	Control_thirty_six	UNS	C04
480	Sample_122	3	316	0.248038	9.95896	9.96302	2.29431	Sample_122	AI_export_Plate 2 UNS LN_C4_C04_CD4p_Live.fcs	RZg17_Control_36_UNS	Control	RZg17	thirty_six	Control_thirty_six	UNS	C04
481	Sample_122	4	111	0.0871272	18.9725	19.3378	2.72696	Sample_122	AI_export_Plate 2 UNS LN_C4_C04_CD4p_Live.fcs	RZg17_Control_36_UNS	Control	RZg17	thirty_six	Control_thirty_six	UNS	C04
482	Sample_122	5	65	0.0510204	22.7683	23.173	2.19847	Sample_122	AI_export_Plate 2 UNS LN_C4_C04_CD4p_Live.fcs	RZg17_Control_36_UNS	Control	RZg17	thirty_six	Control_thirty_six	UNS	C04
483	Sample_122	6	114	0.0894819	5.77204	5.87692	2.15902	Sample_122	AI_export_Plate 2 UNS LN_C4_C04_CD4p_Live.fcs	RZg17_Control_36_UNS	Control	RZg17	thirty_six	Control_thirty_six	UNS	C04
484	Sample_122	7	36	0.0282575	17.7871	17.8782	3.80566	Sample_122	AI_export_Plate 2 UNS LN_C4_C04_CD4p_Live.fcs	RZg17_Control_36_UNS	Control	RZg17	thirty_six	Control_thirty_six	UNS	C04
485	Sample_122	8	37	0.0290424	25.7985	25.8357	0.413543	Sample_122	AI_export_Plate 2 UNS LN_C4_C04_CD4p_Live.fcs	RZg17_Control_36_UNS	Control	RZg17	thirty_six	Control_thirty_six	UNS	C04
486	Sample_122	9	24	0.0188383	20.8785	23.5609	6.09994	Sample_122	AI_export_Plate 2 UNS LN_C4_C04_CD4p_Live.fcs	RZg17_Control_36_UNS	Control	RZg17	thirty_six	Control_thirty_six	UNS	C04
487	Sample_123	1	125	0.0981162	2.12348	1.21837	2.22081	Sample_123	AI_export_Plate 2 UNS LN_C5_C05_CD4p_Live.fcs	34920_aIL10_36_UNS	aIL10	34920	thirty_six	aIL10_thirty_six	UNS	C05
488	Sample_123	10	56	0.043956	15.5862	15.9582	2.72378	Sample_123	AI_export_Plate 2 UNS LN_C5_C05_CD4p_Live.fcs	34920_aIL10_36_UNS	aIL10	34920	thirty_six	aIL10_thirty_six	UNS	C05
489	Sample_123	11	23	0.0180534	26.9381	27.2056	0.610062	Sample_123	AI_export_Plate 2 UNS LN_C5_C05_CD4p_Live.fcs	34920_aIL10_36_UNS	aIL10	34920	thirty_six	aIL10_thirty_six	UNS	C05
490	Sample_123	12	5	0.00392465	9.58221	9.61245	0.0732279	Sample_123	AI_export_Plate 2 UNS LN_C5_C05_CD4p_Live.fcs	34920_aIL10_36_UNS	aIL10	34920	thirty_six	aIL10_thirty_six	UNS	C05
491	Sample_123	13	30	0.0235479	18.7216	17.4779	4.87748	Sample_123	AI_export_Plate 2 UNS LN_C5_C05_CD4p_Live.fcs	34920_aIL10_36_UNS	aIL10	34920	thirty_six	aIL10_thirty_six	UNS	C05
492	Sample_123	14	0	0	NA	NA	NA	Sample_123	AI_export_Plate 2 UNS LN_C5_C05_CD4p_Live.fcs	34920_aIL10_36_UNS	aIL10	34920	thirty_six	aIL10_thirty_six	UNS	C05
493	Sample_123	15	4	0.00313972	20.2717	20.2717	NA	Sample_123	AI_export_Plate 2 UNS LN_C5_C05_CD4p_Live.fcs	34920_aIL10_36_UNS	aIL10	34920	thirty_six	aIL10_thirty_six	UNS	C05
494	Sample_123	16	4	0.00313972	27.1991	27.2055	0.148425	Sample_123	AI_export_Plate 2 UNS LN_C5_C05_CD4p_Live.fcs	34920_aIL10_36_UNS	aIL10	34920	thirty_six	aIL10_thirty_six	UNS	C05
495	Sample_123	17	0	0	NA	NA	NA	Sample_123	AI_export_Plate 2 UNS LN_C5_C05_CD4p_Live.fcs	34920_aIL10_36_UNS	aIL10	34920	thirty_six	aIL10_thirty_six	UNS	C05
496	Sample_123	18	2	0.00156986	3.04573	3.04573	NA	Sample_123	AI_export_Plate 2 UNS LN_C5_C05_CD4p_Live.fcs	34920_aIL10_36_UNS	aIL10	34920	thirty_six	aIL10_thirty_six	UNS	C05
497	Sample_123	2	215	0.16876	3.44718	3.0809	2.86666	Sample_123	AI_export_Plate 2 UNS LN_C5_C05_CD4p_Live.fcs	34920_aIL10_36_UNS	aIL10	34920	thirty_six	aIL10_thirty_six	UNS	C05
498	Sample_123	3	56	0.043956	10.4778	10.459	2.95575	Sample_123	AI_export_Plate 2 UNS LN_C5_C05_CD4p_Live.fcs	34920_aIL10_36_UNS	aIL10	34920	thirty_six	aIL10_thirty_six	UNS	C05
499	Sample_123	4	140	0.10989	18.8426	19.1808	2.06741	Sample_123	AI_export_Plate 2 UNS LN_C5_C05_CD4p_Live.fcs	34920_aIL10_36_UNS	aIL10	34920	thirty_six	aIL10_thirty_six	UNS	C05
500	Sample_123	5	343	0.269231	23.5359	23.8388	1.54255	Sample_123	AI_export_Plate 2 UNS LN_C5_C05_CD4p_Live.fcs	34920_aIL10_36_UNS	aIL10	34920	thirty_six	aIL10_thirty_six	UNS	C05
501	Sample_123	6	37	0.0290424	5.75566	5.88149	2.00661	Sample_123	AI_export_Plate 2 UNS LN_C5_C05_CD4p_Live.fcs	34920_aIL10_36_UNS	aIL10	34920	thirty_six	aIL10_thirty_six	UNS	C05
502	Sample_123	7	57	0.044741	19.4235	20.2717	2.77222	Sample_123	AI_export_Plate 2 UNS LN_C5_C05_CD4p_Live.fcs	34920_aIL10_36_UNS	aIL10	34920	thirty_six	aIL10_thirty_six	UNS	C05
503	Sample_123	8	106	0.0832025	25.3931	25.3861	0.533306	Sample_123	AI_export_Plate 2 UNS LN_C5_C05_CD4p_Live.fcs	34920_aIL10_36_UNS	aIL10	34920	thirty_six	aIL10_thirty_six	UNS	C05
504	Sample_123	9	71	0.05573	18.0618	23.5609	7.63225	Sample_123	AI_export_Plate 2 UNS LN_C5_C05_CD4p_Live.fcs	34920_aIL10_36_UNS	aIL10	34920	thirty_six	aIL10_thirty_six	UNS	C05
505	Sample_124	1	224	0.175824	2.87936	2.12214	2.44328	Sample_124	AI_export_Plate 2 UNS LN_C6_C06_CD4p_Live.fcs	34930_aIL10_36_UNS	aIL10	34930	thirty_six	aIL10_thirty_six	UNS	C06
506	Sample_124	10	28	0.021978	15.7461	16.1794	3.28248	Sample_124	AI_export_Plate 2 UNS LN_C6_C06_CD4p_Live.fcs	34930_aIL10_36_UNS	aIL10	34930	thirty_six	aIL10_thirty_six	UNS	C06
507	Sample_124	11	47	0.0368917	27.2553	27.3917	0.460011	Sample_124	AI_export_Plate 2 UNS LN_C6_C06_CD4p_Live.fcs	34930_aIL10_36_UNS	aIL10	34930	thirty_six	aIL10_thirty_six	UNS	C06
508	Sample_124	12	6	0.00470958	8.94271	9.61245	1.63015	Sample_124	AI_export_Plate 2 UNS LN_C6_C06_CD4p_Live.fcs	34930_aIL10_36_UNS	aIL10	34930	thirty_six	aIL10_thirty_six	UNS	C06
509	Sample_124	13	62	0.0486656	16.7295	17.4779	4.41997	Sample_124	AI_export_Plate 2 UNS LN_C6_C06_CD4p_Live.fcs	34930_aIL10_36_UNS	aIL10	34930	thirty_six	aIL10_thirty_six	UNS	C06
510	Sample_124	14	0	0	NA	NA	NA	Sample_124	AI_export_Plate 2 UNS LN_C6_C06_CD4p_Live.fcs	34930_aIL10_36_UNS	aIL10	34930	thirty_six	aIL10_thirty_six	UNS	C06
511	Sample_124	15	2	0.00156986	10.7768	10.7768	NA	Sample_124	AI_export_Plate 2 UNS LN_C6_C06_CD4p_Live.fcs	34930_aIL10_36_UNS	aIL10	34930	thirty_six	aIL10_thirty_six	UNS	C06
512	Sample_124	16	4	0.00313972	24.6688	26.9684	4.86707	Sample_124	AI_export_Plate 2 UNS LN_C6_C06_CD4p_Live.fcs	34930_aIL10_36_UNS	aIL10	34930	thirty_six	aIL10_thirty_six	UNS	C06
513	Sample_124	17	2	0.00156986	NA	NA	NA	Sample_124	AI_export_Plate 2 UNS LN_C6_C06_CD4p_Live.fcs	34930_aIL10_36_UNS	aIL10	34930	thirty_six	aIL10_thirty_six	UNS	C06
514	Sample_124	18	1	0.000784929	3.60465	3.60465	NA	Sample_124	AI_export_Plate 2 UNS LN_C6_C06_CD4p_Live.fcs	34930_aIL10_36_UNS	aIL10	34930	thirty_six	aIL10_thirty_six	UNS	C06
515	Sample_124	2	253	0.198587	3.3574	3.23887	2.00809	Sample_124	AI_export_Plate 2 UNS LN_C6_C06_CD4p_Live.fcs	34930_aIL10_36_UNS	aIL10	34930	thirty_six	aIL10_thirty_six	UNS	C06
516	Sample_124	3	88	0.0690738	9.97173	9.62363	2.72572	Sample_124	AI_export_Plate 2 UNS LN_C6_C06_CD4p_Live.fcs	34930_aIL10_36_UNS	aIL10	34930	thirty_six	aIL10_thirty_six	UNS	C06
517	Sample_124	4	181	0.142072	18.1366	18.7743	3.07366	Sample_124	AI_export_Plate 2 UNS LN_C6_C06_CD4p_Live.fcs	34930_aIL10_36_UNS	aIL10	34930	thirty_six	aIL10_thirty_six	UNS	C06
518	Sample_124	5	157	0.123234	23.5733	23.7714	1.15413	Sample_124	AI_export_Plate 2 UNS LN_C6_C06_CD4p_Live.fcs	34930_aIL10_36_UNS	aIL10	34930	thirty_six	aIL10_thirty_six	UNS	C06
519	Sample_124	6	78	0.0612245	5.86031	6.05156	2.77009	Sample_124	AI_export_Plate 2 UNS LN_C6_C06_CD4p_Live.fcs	34930_aIL10_36_UNS	aIL10	34930	thirty_six	aIL10_thirty_six	UNS	C06
520	Sample_124	7	35	0.0274725	19.1595	20.3545	3.43322	Sample_124	AI_export_Plate 2 UNS LN_C6_C06_CD4p_Live.fcs	34930_aIL10_36_UNS	aIL10	34930	thirty_six	aIL10_thirty_six	UNS	C06
521	Sample_124	8	71	0.05573	25.653	25.7939	0.430266	Sample_124	AI_export_Plate 2 UNS LN_C6_C06_CD4p_Live.fcs	34930_aIL10_36_UNS	aIL10	34930	thirty_six	aIL10_thirty_six	UNS	C06
522	Sample_124	9	35	0.0274725	20.0354	23.5609	6.72066	Sample_124	AI_export_Plate 2 UNS LN_C6_C06_CD4p_Live.fcs	34930_aIL10_36_UNS	aIL10	34930	thirty_six	aIL10_thirty_six	UNS	C06
523	Sample_125	1	294	0.230769	2.78412	2.14022	2.5613	Sample_125	AI_export_Plate 2 UNS LN_C7_C07_CD4p_Live.fcs	REq17_Control_36_UNS	Control	REq17	thirty_six	Control_thirty_six	UNS	C07
524	Sample_125	10	99	0.077708	14.8072	14.6009	1.82568	Sample_125	AI_export_Plate 2 UNS LN_C7_C07_CD4p_Live.fcs	REq17_Control_36_UNS	Control	REq17	thirty_six	Control_thirty_six	UNS	C07
525	Sample_125	11	18	0.0141287	27.2713	27.557	0.451095	Sample_125	AI_export_Plate 2 UNS LN_C7_C07_CD4p_Live.fcs	REq17_Control_36_UNS	Control	REq17	thirty_six	Control_thirty_six	UNS	C07
526	Sample_125	12	1	0.000784929	9.61245	9.61245	NA	Sample_125	AI_export_Plate 2 UNS LN_C7_C07_CD4p_Live.fcs	REq17_Control_36_UNS	Control	REq17	thirty_six	Control_thirty_six	UNS	C07
527	Sample_125	13	20	0.0156986	15.994	17.4779	4.10309	Sample_125	AI_export_Plate 2 UNS LN_C7_C07_CD4p_Live.fcs	REq17_Control_36_UNS	Control	REq17	thirty_six	Control_thirty_six	UNS	C07
528	Sample_125	14	0	0	NA	NA	NA	Sample_125	AI_export_Plate 2 UNS LN_C7_C07_CD4p_Live.fcs	REq17_Control_36_UNS	Control	REq17	thirty_six	Control_thirty_six	UNS	C07
529	Sample_125	15	2	0.00156986	NA	NA	NA	Sample_125	AI_export_Plate 2 UNS LN_C7_C07_CD4p_Live.fcs	REq17_Control_36_UNS	Control	REq17	thirty_six	Control_thirty_six	UNS	C07
530	Sample_125	16	0	0	NA	NA	NA	Sample_125	AI_export_Plate 2 UNS LN_C7_C07_CD4p_Live.fcs	REq17_Control_36_UNS	Control	REq17	thirty_six	Control_thirty_six	UNS	C07
531	Sample_125	17	0	0	NA	NA	NA	Sample_125	AI_export_Plate 2 UNS LN_C7_C07_CD4p_Live.fcs	REq17_Control_36_UNS	Control	REq17	thirty_six	Control_thirty_six	UNS	C07
532	Sample_125	18	1	0.000784929	3.36015	3.36015	NA	Sample_125	AI_export_Plate 2 UNS LN_C7_C07_CD4p_Live.fcs	REq17_Control_36_UNS	Control	REq17	thirty_six	Control_thirty_six	UNS	C07
533	Sample_125	2	330	0.259027	3.13276	2.9084	1.91765	Sample_125	AI_export_Plate 2 UNS LN_C7_C07_CD4p_Live.fcs	REq17_Control_36_UNS	Control	REq17	thirty_six	Control_thirty_six	UNS	C07
534	Sample_125	3	188	0.147567	9.95853	10.0936	2.30859	Sample_125	AI_export_Plate 2 UNS LN_C7_C07_CD4p_Live.fcs	REq17_Control_36_UNS	Control	REq17	thirty_six	Control_thirty_six	UNS	C07
535	Sample_125	4	129	0.101256	18.5884	19.3911	4.1961	Sample_125	AI_export_Plate 2 UNS LN_C7_C07_CD4p_Live.fcs	REq17_Control_36_UNS	Control	REq17	thirty_six	Control_thirty_six	UNS	C07
536	Sample_125	5	44	0.0345369	22.4582	23.3179	3.89243	Sample_125	AI_export_Plate 2 UNS LN_C7_C07_CD4p_Live.fcs	REq17_Control_36_UNS	Control	REq17	thirty_six	Control_thirty_six	UNS	C07
537	Sample_125	6	92	0.0722135	5.43938	5.58915	2.4166	Sample_125	AI_export_Plate 2 UNS LN_C7_C07_CD4p_Live.fcs	REq17_Control_36_UNS	Control	REq17	thirty_six	Control_thirty_six	UNS	C07
538	Sample_125	7	19	0.0149137	17.0791	18.112	4.27274	Sample_125	AI_export_Plate 2 UNS LN_C7_C07_CD4p_Live.fcs	REq17_Control_36_UNS	Control	REq17	thirty_six	Control_thirty_six	UNS	C07
539	Sample_125	8	15	0.0117739	25.8724	25.7868	0.277925	Sample_125	AI_export_Plate 2 UNS LN_C7_C07_CD4p_Live.fcs	REq17_Control_36_UNS	Control	REq17	thirty_six	Control_thirty_six	UNS	C07
540	Sample_125	9	22	0.0172684	15.8635	22.2559	8.4013	Sample_125	AI_export_Plate 2 UNS LN_C7_C07_CD4p_Live.fcs	REq17_Control_36_UNS	Control	REq17	thirty_six	Control_thirty_six	UNS	C07
541	Sample_126	1	199	0.156201	3.17855	2.94608	2.289	Sample_126	AI_export_Plate 2 UNS LN_C8_C08_CD4p_Live.fcs	RVi17_Control_36_UNS	Control	RVi17	thirty_six	Control_thirty_six	UNS	C08
542	Sample_126	10	62	0.0486656	15.696	16.0296	1.53252	Sample_126	AI_export_Plate 2 UNS LN_C8_C08_CD4p_Live.fcs	RVi17_Control_36_UNS	Control	RVi17	thirty_six	Control_thirty_six	UNS	C08
543	Sample_126	11	39	0.0306122	27.2926	27.4658	0.359165	Sample_126	AI_export_Plate 2 UNS LN_C8_C08_CD4p_Live.fcs	RVi17_Control_36_UNS	Control	RVi17	thirty_six	Control_thirty_six	UNS	C08
544	Sample_126	12	16	0.0125589	9.20902	9.61245	0.778826	Sample_126	AI_export_Plate 2 UNS LN_C8_C08_CD4p_Live.fcs	RVi17_Control_36_UNS	Control	RVi17	thirty_six	Control_thirty_six	UNS	C08
545	Sample_126	13	24	0.0188383	17.3078	17.4779	2.82273	Sample_126	AI_export_Plate 2 UNS LN_C8_C08_CD4p_Live.fcs	RVi17_Control_36_UNS	Control	RVi17	thirty_six	Control_thirty_six	UNS	C08
546	Sample_126	14	0	0	NA	NA	NA	Sample_126	AI_export_Plate 2 UNS LN_C8_C08_CD4p_Live.fcs	RVi17_Control_36_UNS	Control	RVi17	thirty_six	Control_thirty_six	UNS	C08
547	Sample_126	15	0	0	NA	NA	NA	Sample_126	AI_export_Plate 2 UNS LN_C8_C08_CD4p_Live.fcs	RVi17_Control_36_UNS	Control	RVi17	thirty_six	Control_thirty_six	UNS	C08
548	Sample_126	16	0	0	NA	NA	NA	Sample_126	AI_export_Plate 2 UNS LN_C8_C08_CD4p_Live.fcs	RVi17_Control_36_UNS	Control	RVi17	thirty_six	Control_thirty_six	UNS	C08
549	Sample_126	17	2	0.00156986	NA	NA	NA	Sample_126	AI_export_Plate 2 UNS LN_C8_C08_CD4p_Live.fcs	RVi17_Control_36_UNS	Control	RVi17	thirty_six	Control_thirty_six	UNS	C08
550	Sample_126	18	0	0	NA	NA	NA	Sample_126	AI_export_Plate 2 UNS LN_C8_C08_CD4p_Live.fcs	RVi17_Control_36_UNS	Control	RVi17	thirty_six	Control_thirty_six	UNS	C08
551	Sample_126	2	241	0.189168	3.28425	2.96653	2.15193	Sample_126	AI_export_Plate 2 UNS LN_C8_C08_CD4p_Live.fcs	RVi17_Control_36_UNS	Control	RVi17	thirty_six	Control_thirty_six	UNS	C08
552	Sample_126	3	115	0.0902669	9.67182	9.54717	2.43659	Sample_126	AI_export_Plate 2 UNS LN_C8_C08_CD4p_Live.fcs	RVi17_Control_36_UNS	Control	RVi17	thirty_six	Control_thirty_six	UNS	C08
553	Sample_126	4	183	0.143642	18.3648	18.7543	2.41737	Sample_126	AI_export_Plate 2 UNS LN_C8_C08_CD4p_Live.fcs	RVi17_Control_36_UNS	Control	RVi17	thirty_six	Control_thirty_six	UNS	C08
554	Sample_126	5	93	0.0729984	23.0517	23.6053	2.01691	Sample_126	AI_export_Plate 2 UNS LN_C8_C08_CD4p_Live.fcs	RVi17_Control_36_UNS	Control	RVi17	thirty_six	Control_thirty_six	UNS	C08
555	Sample_126	6	107	0.0839874	5.64746	6.00631	1.58125	Sample_126	AI_export_Plate 2 UNS LN_C8_C08_CD4p_Live.fcs	RVi17_Control_36_UNS	Control	RVi17	thirty_six	Control_thirty_six	UNS	C08
556	Sample_126	7	46	0.0361068	17.9043	18.2846	4.1863	Sample_126	AI_export_Plate 2 UNS LN_C8_C08_CD4p_Live.fcs	RVi17_Control_36_UNS	Control	RVi17	thirty_six	Control_thirty_six	UNS	C08
557	Sample_126	8	81	0.0635793	25.4143	25.8438	2.56213	Sample_126	AI_export_Plate 2 UNS LN_C8_C08_CD4p_Live.fcs	RVi17_Control_36_UNS	Control	RVi17	thirty_six	Control_thirty_six	UNS	C08
558	Sample_126	9	66	0.0518053	18.011	23.5609	7.75854	Sample_126	AI_export_Plate 2 UNS LN_C8_C08_CD4p_Live.fcs	RVi17_Control_36_UNS	Control	RVi17	thirty_six	Control_thirty_six	UNS	C08
559	Sample_127	1	188	0.147567	3.89795	3.88518	2.55538	Sample_127	AI_export_Plate 2 UNS LN_C9_C09_CD4p_Live.fcs	RWs17_aIL10+aPD1_36_UNS	aIL10+aPD1	RWs17	thirty_six	aIL10+aPD1_thirty_six	UNS	C09
560	Sample_127	10	162	0.127159	15.2047	15.427	1.72815	Sample_127	AI_export_Plate 2 UNS LN_C9_C09_CD4p_Live.fcs	RWs17_aIL10+aPD1_36_UNS	aIL10+aPD1	RWs17	thirty_six	aIL10+aPD1_thirty_six	UNS	C09
561	Sample_127	11	33	0.0259027	27.3978	27.557	0.35447	Sample_127	AI_export_Plate 2 UNS LN_C9_C09_CD4p_Live.fcs	RWs17_aIL10+aPD1_36_UNS	aIL10+aPD1	RWs17	thirty_six	aIL10+aPD1_thirty_six	UNS	C09
562	Sample_127	12	9	0.00706436	8.73974	9.60139	1.59284	Sample_127	AI_export_Plate 2 UNS LN_C9_C09_CD4p_Live.fcs	RWs17_aIL10+aPD1_36_UNS	aIL10+aPD1	RWs17	thirty_six	aIL10+aPD1_thirty_six	UNS	C09
563	Sample_127	13	23	0.0180534	19.0489	17.4779	1.84998	Sample_127	AI_export_Plate 2 UNS LN_C9_C09_CD4p_Live.fcs	RWs17_aIL10+aPD1_36_UNS	aIL10+aPD1	RWs17	thirty_six	aIL10+aPD1_thirty_six	UNS	C09
564	Sample_127	14	1	0.000784929	27.342	27.342	NA	Sample_127	AI_export_Plate 2 UNS LN_C9_C09_CD4p_Live.fcs	RWs17_aIL10+aPD1_36_UNS	aIL10+aPD1	RWs17	thirty_six	aIL10+aPD1_thirty_six	UNS	C09
565	Sample_127	15	0	0	NA	NA	NA	Sample_127	AI_export_Plate 2 UNS LN_C9_C09_CD4p_Live.fcs	RWs17_aIL10+aPD1_36_UNS	aIL10+aPD1	RWs17	thirty_six	aIL10+aPD1_thirty_six	UNS	C09
566	Sample_127	16	3	0.00235479	26.9513	26.8467	0.331469	Sample_127	AI_export_Plate 2 UNS LN_C9_C09_CD4p_Live.fcs	RWs17_aIL10+aPD1_36_UNS	aIL10+aPD1	RWs17	thirty_six	aIL10+aPD1_thirty_six	UNS	C09
567	Sample_127	17	2	0.00156986	NA	NA	NA	Sample_127	AI_export_Plate 2 UNS LN_C9_C09_CD4p_Live.fcs	RWs17_aIL10+aPD1_36_UNS	aIL10+aPD1	RWs17	thirty_six	aIL10+aPD1_thirty_six	UNS	C09
568	Sample_127	18	1	0.000784929	3.59526	3.59526	NA	Sample_127	AI_export_Plate 2 UNS LN_C9_C09_CD4p_Live.fcs	RWs17_aIL10+aPD1_36_UNS	aIL10+aPD1	RWs17	thirty_six	aIL10+aPD1_thirty_six	UNS	C09
569	Sample_127	2	222	0.174254	3.75209	3.15653	3.09943	Sample_127	AI_export_Plate 2 UNS LN_C9_C09_CD4p_Live.fcs	RWs17_aIL10+aPD1_36_UNS	aIL10+aPD1	RWs17	thirty_six	aIL10+aPD1_thirty_six	UNS	C09
570	Sample_127	3	203	0.159341	9.71238	9.66236	2.4866	Sample_127	AI_export_Plate 2 UNS LN_C9_C09_CD4p_Live.fcs	RWs17_aIL10+aPD1_36_UNS	aIL10+aPD1	RWs17	thirty_six	aIL10+aPD1_thirty_six	UNS	C09
571	Sample_127	4	114	0.0894819	18.7006	19.2466	3.46087	Sample_127	AI_export_Plate 2 UNS LN_C9_C09_CD4p_Live.fcs	RWs17_aIL10+aPD1_36_UNS	aIL10+aPD1	RWs17	thirty_six	aIL10+aPD1_thirty_six	UNS	C09
572	Sample_127	5	153	0.120094	22.4206	22.7177	2.37184	Sample_127	AI_export_Plate 2 UNS LN_C9_C09_CD4p_Live.fcs	RWs17_aIL10+aPD1_36_UNS	aIL10+aPD1	RWs17	thirty_six	aIL10+aPD1_thirty_six	UNS	C09
573	Sample_127	6	82	0.0643642	5.67702	6.06595	1.42389	Sample_127	AI_export_Plate 2 UNS LN_C9_C09_CD4p_Live.fcs	RWs17_aIL10+aPD1_36_UNS	aIL10+aPD1	RWs17	thirty_six	aIL10+aPD1_thirty_six	UNS	C09
574	Sample_127	7	39	0.0306122	18.2774	18.4278	3.64404	Sample_127	AI_export_Plate 2 UNS LN_C9_C09_CD4p_Live.fcs	RWs17_aIL10+aPD1_36_UNS	aIL10+aPD1	RWs17	thirty_six	aIL10+aPD1_thirty_six	UNS	C09
575	Sample_127	8	30	0.0235479	25.7043	25.8689	0.548163	Sample_127	AI_export_Plate 2 UNS LN_C9_C09_CD4p_Live.fcs	RWs17_aIL10+aPD1_36_UNS	aIL10+aPD1	RWs17	thirty_six	aIL10+aPD1_thirty_six	UNS	C09
576	Sample_127	9	9	0.00706436	19.4153	23.3095	7.00938	Sample_127	AI_export_Plate 2 UNS LN_C9_C09_CD4p_Live.fcs	RWs17_aIL10+aPD1_36_UNS	aIL10+aPD1	RWs17	thirty_six	aIL10+aPD1_thirty_six	UNS	C09
577	Sample_13	1	233	0.182889	2.8344	2.37959	2.67207	Sample_13	AI_export_Plate 1 UNS LN_B1_B01_CD4p_Live.fcs	RMl17_Control_-1_UNS	Control	RMl17	minus_one	Control_minus_one	UNS	B01
578	Sample_13	10	268	0.210361	14.6446	14.6009	2.01788	Sample_13	AI_export_Plate 1 UNS LN_B1_B01_CD4p_Live.fcs	RMl17_Control_-1_UNS	Control	RMl17	minus_one	Control_minus_one	UNS	B01
579	Sample_13	11	5	0.00392465	27.5892	27.557	0.0483624	Sample_13	AI_export_Plate 1 UNS LN_B1_B01_CD4p_Live.fcs	RMl17_Control_-1_UNS	Control	RMl17	minus_one	Control_minus_one	UNS	B01
580	Sample_13	12	4	0.00313972	9.14934	9.62051	0.961199	Sample_13	AI_export_Plate 1 UNS LN_B1_B01_CD4p_Live.fcs	RMl17_Control_-1_UNS	Control	RMl17	minus_one	Control_minus_one	UNS	B01
581	Sample_13	13	18	0.0141287	18.2343	17.4779	1.88139	Sample_13	AI_export_Plate 1 UNS LN_B1_B01_CD4p_Live.fcs	RMl17_Control_-1_UNS	Control	RMl17	minus_one	Control_minus_one	UNS	B01
582	Sample_13	14	0	0	NA	NA	NA	Sample_13	AI_export_Plate 1 UNS LN_B1_B01_CD4p_Live.fcs	RMl17_Control_-1_UNS	Control	RMl17	minus_one	Control_minus_one	UNS	B01
583	Sample_13	15	2	0.00156986	NA	NA	NA	Sample_13	AI_export_Plate 1 UNS LN_B1_B01_CD4p_Live.fcs	RMl17_Control_-1_UNS	Control	RMl17	minus_one	Control_minus_one	UNS	B01
584	Sample_13	16	0	0	NA	NA	NA	Sample_13	AI_export_Plate 1 UNS LN_B1_B01_CD4p_Live.fcs	RMl17_Control_-1_UNS	Control	RMl17	minus_one	Control_minus_one	UNS	B01
585	Sample_13	17	1	0.000784929	NA	NA	NA	Sample_13	AI_export_Plate 1 UNS LN_B1_B01_CD4p_Live.fcs	RMl17_Control_-1_UNS	Control	RMl17	minus_one	Control_minus_one	UNS	B01
586	Sample_13	18	0	0	NA	NA	NA	Sample_13	AI_export_Plate 1 UNS LN_B1_B01_CD4p_Live.fcs	RMl17_Control_-1_UNS	Control	RMl17	minus_one	Control_minus_one	UNS	B01
587	Sample_13	2	95	0.0745683	3.68557	3.37168	1.94903	Sample_13	AI_export_Plate 1 UNS LN_B1_B01_CD4p_Live.fcs	RMl17_Control_-1_UNS	Control	RMl17	minus_one	Control_minus_one	UNS	B01
588	Sample_13	3	266	0.208791	9.91531	10.2047	2.27988	Sample_13	AI_export_Plate 1 UNS LN_B1_B01_CD4p_Live.fcs	RMl17_Control_-1_UNS	Control	RMl17	minus_one	Control_minus_one	UNS	B01
589	Sample_13	4	134	0.105181	18.1873	18.4099	3.17862	Sample_13	AI_export_Plate 1 UNS LN_B1_B01_CD4p_Live.fcs	RMl17_Control_-1_UNS	Control	RMl17	minus_one	Control_minus_one	UNS	B01
590	Sample_13	5	111	0.0871272	22.6414	22.7177	1.92189	Sample_13	AI_export_Plate 1 UNS LN_B1_B01_CD4p_Live.fcs	RMl17_Control_-1_UNS	Control	RMl17	minus_one	Control_minus_one	UNS	B01
591	Sample_13	6	88	0.0690738	5.79401	5.72818	2.41936	Sample_13	AI_export_Plate 1 UNS LN_B1_B01_CD4p_Live.fcs	RMl17_Control_-1_UNS	Control	RMl17	minus_one	Control_minus_one	UNS	B01
592	Sample_13	7	17	0.0133438	17.8724	20.1822	5.60964	Sample_13	AI_export_Plate 1 UNS LN_B1_B01_CD4p_Live.fcs	RMl17_Control_-1_UNS	Control	RMl17	minus_one	Control_minus_one	UNS	B01
593	Sample_13	8	17	0.0133438	25.8151	25.8944	0.503195	Sample_13	AI_export_Plate 1 UNS LN_B1_B01_CD4p_Live.fcs	RMl17_Control_-1_UNS	Control	RMl17	minus_one	Control_minus_one	UNS	B01
594	Sample_13	9	15	0.0117739	20.3595	23.5609	6.63016	Sample_13	AI_export_Plate 1 UNS LN_B1_B01_CD4p_Live.fcs	RMl17_Control_-1_UNS	Control	RMl17	minus_one	Control_minus_one	UNS	B01
595	Sample_14	1	171	0.134223	3.74399	3.46794	2.77363	Sample_14	AI_export_Plate 1 UNS LN_B10_B10_CD4p_Live.fcs	34897_aIL10_7_UNS	aIL10	34897	seven	aIL10_seven	UNS	B10
596	Sample_14	10	247	0.193878	15.1351	15.5539	1.84741	Sample_14	AI_export_Plate 1 UNS LN_B10_B10_CD4p_Live.fcs	34897_aIL10_7_UNS	aIL10	34897	seven	aIL10_seven	UNS	B10
597	Sample_14	11	13	0.0102041	26.8062	27.557	1.9257	Sample_14	AI_export_Plate 1 UNS LN_B10_B10_CD4p_Live.fcs	34897_aIL10_7_UNS	aIL10	34897	seven	aIL10_seven	UNS	B10
598	Sample_14	12	12	0.00941915	8.4858	9.52477	1.82912	Sample_14	AI_export_Plate 1 UNS LN_B10_B10_CD4p_Live.fcs	34897_aIL10_7_UNS	aIL10	34897	seven	aIL10_seven	UNS	B10
599	Sample_14	13	19	0.0149137	19.6328	17.4779	2.89177	Sample_14	AI_export_Plate 1 UNS LN_B10_B10_CD4p_Live.fcs	34897_aIL10_7_UNS	aIL10	34897	seven	aIL10_seven	UNS	B10
600	Sample_14	14	0	0	NA	NA	NA	Sample_14	AI_export_Plate 1 UNS LN_B10_B10_CD4p_Live.fcs	34897_aIL10_7_UNS	aIL10	34897	seven	aIL10_seven	UNS	B10
601	Sample_14	15	1	0.000784929	NA	NA	NA	Sample_14	AI_export_Plate 1 UNS LN_B10_B10_CD4p_Live.fcs	34897_aIL10_7_UNS	aIL10	34897	seven	aIL10_seven	UNS	B10
602	Sample_14	16	0	0	NA	NA	NA	Sample_14	AI_export_Plate 1 UNS LN_B10_B10_CD4p_Live.fcs	34897_aIL10_7_UNS	aIL10	34897	seven	aIL10_seven	UNS	B10
603	Sample_14	17	1	0.000784929	NA	NA	NA	Sample_14	AI_export_Plate 1 UNS LN_B10_B10_CD4p_Live.fcs	34897_aIL10_7_UNS	aIL10	34897	seven	aIL10_seven	UNS	B10
604	Sample_14	18	0	0	NA	NA	NA	Sample_14	AI_export_Plate 1 UNS LN_B10_B10_CD4p_Live.fcs	34897_aIL10_7_UNS	aIL10	34897	seven	aIL10_seven	UNS	B10
605	Sample_14	2	183	0.143642	3.15376	3.04573	1.49853	Sample_14	AI_export_Plate 1 UNS LN_B10_B10_CD4p_Live.fcs	34897_aIL10_7_UNS	aIL10	34897	seven	aIL10_seven	UNS	B10
606	Sample_14	3	167	0.131083	10.0049	9.94454	2.23735	Sample_14	AI_export_Plate 1 UNS LN_B10_B10_CD4p_Live.fcs	34897_aIL10_7_UNS	aIL10	34897	seven	aIL10_seven	UNS	B10
607	Sample_14	4	149	0.116954	18.6376	18.7743	3.02172	Sample_14	AI_export_Plate 1 UNS LN_B10_B10_CD4p_Live.fcs	34897_aIL10_7_UNS	aIL10	34897	seven	aIL10_seven	UNS	B10
608	Sample_14	5	83	0.0651491	22.9902	22.8492	0.801486	Sample_14	AI_export_Plate 1 UNS LN_B10_B10_CD4p_Live.fcs	34897_aIL10_7_UNS	aIL10	34897	seven	aIL10_seven	UNS	B10
609	Sample_14	6	133	0.104396	5.72985	5.95084	1.1477	Sample_14	AI_export_Plate 1 UNS LN_B10_B10_CD4p_Live.fcs	34897_aIL10_7_UNS	aIL10	34897	seven	aIL10_seven	UNS	B10
610	Sample_14	7	47	0.0368917	17.9371	17.7461	3.24456	Sample_14	AI_export_Plate 1 UNS LN_B10_B10_CD4p_Live.fcs	34897_aIL10_7_UNS	aIL10	34897	seven	aIL10_seven	UNS	B10
611	Sample_14	8	17	0.0133438	24.3066	25.8357	4.6458	Sample_14	AI_export_Plate 1 UNS LN_B10_B10_CD4p_Live.fcs	34897_aIL10_7_UNS	aIL10	34897	seven	aIL10_seven	UNS	B10
612	Sample_14	9	31	0.0243328	15.8407	23.5609	8.13534	Sample_14	AI_export_Plate 1 UNS LN_B10_B10_CD4p_Live.fcs	34897_aIL10_7_UNS	aIL10	34897	seven	aIL10_seven	UNS	B10
613	Sample_15	1	286	0.22449	4.29937	4.79854	2.29808	Sample_15	AI_export_Plate 1 UNS LN_B11_B11_CD4p_Live.fcs	RRh17_aIL10+aPD1_7_UNS	aIL10+aPD1	RRh17	seven	aIL10+aPD1_seven	UNS	B11
614	Sample_15	10	178	0.139717	15.0666	15.4576	1.86041	Sample_15	AI_export_Plate 1 UNS LN_B11_B11_CD4p_Live.fcs	RRh17_aIL10+aPD1_7_UNS	aIL10+aPD1	RRh17	seven	aIL10+aPD1_seven	UNS	B11
615	Sample_15	11	25	0.0196232	27.0264	27.557	2.09509	Sample_15	AI_export_Plate 1 UNS LN_B11_B11_CD4p_Live.fcs	RRh17_aIL10+aPD1_7_UNS	aIL10+aPD1	RRh17	seven	aIL10+aPD1_seven	UNS	B11
616	Sample_15	12	4	0.00313972	9.49115	9.61008	0.247467	Sample_15	AI_export_Plate 1 UNS LN_B11_B11_CD4p_Live.fcs	RRh17_aIL10+aPD1_7_UNS	aIL10+aPD1	RRh17	seven	aIL10+aPD1_seven	UNS	B11
617	Sample_15	13	31	0.0243328	18.1208	17.4779	1.58136	Sample_15	AI_export_Plate 1 UNS LN_B11_B11_CD4p_Live.fcs	RRh17_aIL10+aPD1_7_UNS	aIL10+aPD1	RRh17	seven	aIL10+aPD1_seven	UNS	B11
618	Sample_15	14	1	0.000784929	27.342	27.342	NA	Sample_15	AI_export_Plate 1 UNS LN_B11_B11_CD4p_Live.fcs	RRh17_aIL10+aPD1_7_UNS	aIL10+aPD1	RRh17	seven	aIL10+aPD1_seven	UNS	B11
619	Sample_15	15	0	0	NA	NA	NA	Sample_15	AI_export_Plate 1 UNS LN_B11_B11_CD4p_Live.fcs	RRh17_aIL10+aPD1_7_UNS	aIL10+aPD1	RRh17	seven	aIL10+aPD1_seven	UNS	B11
620	Sample_15	16	0	0	NA	NA	NA	Sample_15	AI_export_Plate 1 UNS LN_B11_B11_CD4p_Live.fcs	RRh17_aIL10+aPD1_7_UNS	aIL10+aPD1	RRh17	seven	aIL10+aPD1_seven	UNS	B11
621	Sample_15	17	1	0.000784929	13.2271	13.2271	NA	Sample_15	AI_export_Plate 1 UNS LN_B11_B11_CD4p_Live.fcs	RRh17_aIL10+aPD1_7_UNS	aIL10+aPD1	RRh17	seven	aIL10+aPD1_seven	UNS	B11
622	Sample_15	18	0	0	NA	NA	NA	Sample_15	AI_export_Plate 1 UNS LN_B11_B11_CD4p_Live.fcs	RRh17_aIL10+aPD1_7_UNS	aIL10+aPD1	RRh17	seven	aIL10+aPD1_seven	UNS	B11
623	Sample_15	2	145	0.113815	3.61377	3.3139	2.58813	Sample_15	AI_export_Plate 1 UNS LN_B11_B11_CD4p_Live.fcs	RRh17_aIL10+aPD1_7_UNS	aIL10+aPD1	RRh17	seven	aIL10+aPD1_seven	UNS	B11
624	Sample_15	3	183	0.143642	10.0034	9.90917	2.31508	Sample_15	AI_export_Plate 1 UNS LN_B11_B11_CD4p_Live.fcs	RRh17_aIL10+aPD1_7_UNS	aIL10+aPD1	RRh17	seven	aIL10+aPD1_seven	UNS	B11
625	Sample_15	4	112	0.0879121	18.445	18.8917	3.40139	Sample_15	AI_export_Plate 1 UNS LN_B11_B11_CD4p_Live.fcs	RRh17_aIL10+aPD1_7_UNS	aIL10+aPD1	RRh17	seven	aIL10+aPD1_seven	UNS	B11
626	Sample_15	5	51	0.0400314	22.8526	22.9161	1.26968	Sample_15	AI_export_Plate 1 UNS LN_B11_B11_CD4p_Live.fcs	RRh17_aIL10+aPD1_7_UNS	aIL10+aPD1	RRh17	seven	aIL10+aPD1_seven	UNS	B11
627	Sample_15	6	195	0.153061	5.82611	6.04647	1.28658	Sample_15	AI_export_Plate 1 UNS LN_B11_B11_CD4p_Live.fcs	RRh17_aIL10+aPD1_7_UNS	aIL10+aPD1	RRh17	seven	aIL10+aPD1_seven	UNS	B11
628	Sample_15	7	35	0.0274725	17.4421	17.882	4.56956	Sample_15	AI_export_Plate 1 UNS LN_B11_B11_CD4p_Live.fcs	RRh17_aIL10+aPD1_7_UNS	aIL10+aPD1	RRh17	seven	aIL10+aPD1_seven	UNS	B11
629	Sample_15	8	10	0.00784929	25.6221	25.6642	0.642841	Sample_15	AI_export_Plate 1 UNS LN_B11_B11_CD4p_Live.fcs	RRh17_aIL10+aPD1_7_UNS	aIL10+aPD1	RRh17	seven	aIL10+aPD1_seven	UNS	B11
630	Sample_15	9	17	0.0133438	15.9546	23.5609	8.31727	Sample_15	AI_export_Plate 1 UNS LN_B11_B11_CD4p_Live.fcs	RRh17_aIL10+aPD1_7_UNS	aIL10+aPD1	RRh17	seven	aIL10+aPD1_seven	UNS	B11
631	Sample_16	1	216	0.169545	3.76857	3.99209	2.48597	Sample_16	AI_export_Plate 1 UNS LN_B12_B12_CD4p_Live.fcs	RFn17_aIL10_7_UNS	aIL10	RFn17	seven	aIL10_seven	UNS	B12
632	Sample_16	10	167	0.131083	14.8356	14.7233	1.95626	Sample_16	AI_export_Plate 1 UNS LN_B12_B12_CD4p_Live.fcs	RFn17_aIL10_7_UNS	aIL10	RFn17	seven	aIL10_seven	UNS	B12
633	Sample_16	11	24	0.0188383	27.4722	27.557	0.354347	Sample_16	AI_export_Plate 1 UNS LN_B12_B12_CD4p_Live.fcs	RFn17_aIL10_7_UNS	aIL10	RFn17	seven	aIL10_seven	UNS	B12
634	Sample_16	12	19	0.0149137	9.30896	9.61107	0.643475	Sample_16	AI_export_Plate 1 UNS LN_B12_B12_CD4p_Live.fcs	RFn17_aIL10_7_UNS	aIL10	RFn17	seven	aIL10_seven	UNS	B12
635	Sample_16	13	24	0.0188383	17.0728	17.4779	3.97641	Sample_16	AI_export_Plate 1 UNS LN_B12_B12_CD4p_Live.fcs	RFn17_aIL10_7_UNS	aIL10	RFn17	seven	aIL10_seven	UNS	B12
636	Sample_16	14	0	0	NA	NA	NA	Sample_16	AI_export_Plate 1 UNS LN_B12_B12_CD4p_Live.fcs	RFn17_aIL10_7_UNS	aIL10	RFn17	seven	aIL10_seven	UNS	B12
637	Sample_16	15	1	0.000784929	NA	NA	NA	Sample_16	AI_export_Plate 1 UNS LN_B12_B12_CD4p_Live.fcs	RFn17_aIL10_7_UNS	aIL10	RFn17	seven	aIL10_seven	UNS	B12
638	Sample_16	16	1	0.000784929	26.6741	26.6741	NA	Sample_16	AI_export_Plate 1 UNS LN_B12_B12_CD4p_Live.fcs	RFn17_aIL10_7_UNS	aIL10	RFn17	seven	aIL10_seven	UNS	B12
639	Sample_16	17	1	0.000784929	NA	NA	NA	Sample_16	AI_export_Plate 1 UNS LN_B12_B12_CD4p_Live.fcs	RFn17_aIL10_7_UNS	aIL10	RFn17	seven	aIL10_seven	UNS	B12
640	Sample_16	18	0	0	NA	NA	NA	Sample_16	AI_export_Plate 1 UNS LN_B12_B12_CD4p_Live.fcs	RFn17_aIL10_7_UNS	aIL10	RFn17	seven	aIL10_seven	UNS	B12
641	Sample_16	2	161	0.126374	3.61633	3.21165	2.19927	Sample_16	AI_export_Plate 1 UNS LN_B12_B12_CD4p_Live.fcs	RFn17_aIL10_7_UNS	aIL10	RFn17	seven	aIL10_seven	UNS	B12
642	Sample_16	3	306	0.240188	9.5327	9.69385	1.81142	Sample_16	AI_export_Plate 1 UNS LN_B12_B12_CD4p_Live.fcs	RFn17_aIL10_7_UNS	aIL10	RFn17	seven	aIL10_seven	UNS	B12
643	Sample_16	4	160	0.125589	18.7039	19.1696	2.7686	Sample_16	AI_export_Plate 1 UNS LN_B12_B12_CD4p_Live.fcs	RFn17_aIL10_7_UNS	aIL10	RFn17	seven	aIL10_seven	UNS	B12
644	Sample_16	5	49	0.0384615	23.1221	23.1718	0.85945	Sample_16	AI_export_Plate 1 UNS LN_B12_B12_CD4p_Live.fcs	RFn17_aIL10_7_UNS	aIL10	RFn17	seven	aIL10_seven	UNS	B12
645	Sample_16	6	67	0.0525903	6.16758	5.94885	2.60045	Sample_16	AI_export_Plate 1 UNS LN_B12_B12_CD4p_Live.fcs	RFn17_aIL10_7_UNS	aIL10	RFn17	seven	aIL10_seven	UNS	B12
646	Sample_16	7	27	0.0211931	17.8923	17.7788	3.43959	Sample_16	AI_export_Plate 1 UNS LN_B12_B12_CD4p_Live.fcs	RFn17_aIL10_7_UNS	aIL10	RFn17	seven	aIL10_seven	UNS	B12
647	Sample_16	8	22	0.0172684	25.7262	25.8357	0.505611	Sample_16	AI_export_Plate 1 UNS LN_B12_B12_CD4p_Live.fcs	RFn17_aIL10_7_UNS	aIL10	RFn17	seven	aIL10_seven	UNS	B12
648	Sample_16	9	29	0.022763	20.0517	23.5609	6.95546	Sample_16	AI_export_Plate 1 UNS LN_B12_B12_CD4p_Live.fcs	RFn17_aIL10_7_UNS	aIL10	RFn17	seven	aIL10_seven	UNS	B12
649	Sample_17	1	240	0.188383	4.46306	4.62969	1.56127	Sample_17	AI_export_Plate 1 UNS LN_B2_B02_CD4p_Live.fcs	RIb17_aIL10+aPD1_-1_UNS	aIL10+aPD1	RIb17	minus_one	aIL10+aPD1_minus_one	UNS	B02
650	Sample_17	10	171	0.134223	15.1744	15.5186	1.95497	Sample_17	AI_export_Plate 1 UNS LN_B2_B02_CD4p_Live.fcs	RIb17_aIL10+aPD1_-1_UNS	aIL10+aPD1	RIb17	minus_one	aIL10+aPD1_minus_one	UNS	B02
651	Sample_17	11	4	0.00313972	25.59	26.8281	3.00399	Sample_17	AI_export_Plate 1 UNS LN_B2_B02_CD4p_Live.fcs	RIb17_aIL10+aPD1_-1_UNS	aIL10+aPD1	RIb17	minus_one	aIL10+aPD1_minus_one	UNS	B02
652	Sample_17	12	6	0.00470958	13.6303	9.61683	7.80914	Sample_17	AI_export_Plate 1 UNS LN_B2_B02_CD4p_Live.fcs	RIb17_aIL10+aPD1_-1_UNS	aIL10+aPD1	RIb17	minus_one	aIL10+aPD1_minus_one	UNS	B02
653	Sample_17	13	11	0.00863422	18.1005	17.4779	1.38589	Sample_17	AI_export_Plate 1 UNS LN_B2_B02_CD4p_Live.fcs	RIb17_aIL10+aPD1_-1_UNS	aIL10+aPD1	RIb17	minus_one	aIL10+aPD1_minus_one	UNS	B02
654	Sample_17	14	0	0	NA	NA	NA	Sample_17	AI_export_Plate 1 UNS LN_B2_B02_CD4p_Live.fcs	RIb17_aIL10+aPD1_-1_UNS	aIL10+aPD1	RIb17	minus_one	aIL10+aPD1_minus_one	UNS	B02
655	Sample_17	15	0	0	NA	NA	NA	Sample_17	AI_export_Plate 1 UNS LN_B2_B02_CD4p_Live.fcs	RIb17_aIL10+aPD1_-1_UNS	aIL10+aPD1	RIb17	minus_one	aIL10+aPD1_minus_one	UNS	B02
656	Sample_17	16	2	0.00156986	27.047	27.047	0.306985	Sample_17	AI_export_Plate 1 UNS LN_B2_B02_CD4p_Live.fcs	RIb17_aIL10+aPD1_-1_UNS	aIL10+aPD1	RIb17	minus_one	aIL10+aPD1_minus_one	UNS	B02
657	Sample_17	17	0	0	NA	NA	NA	Sample_17	AI_export_Plate 1 UNS LN_B2_B02_CD4p_Live.fcs	RIb17_aIL10+aPD1_-1_UNS	aIL10+aPD1	RIb17	minus_one	aIL10+aPD1_minus_one	UNS	B02
658	Sample_17	18	1	0.000784929	3.59401	3.59401	NA	Sample_17	AI_export_Plate 1 UNS LN_B2_B02_CD4p_Live.fcs	RIb17_aIL10+aPD1_-1_UNS	aIL10+aPD1	RIb17	minus_one	aIL10+aPD1_minus_one	UNS	B02
659	Sample_17	2	98	0.0769231	4.08056	3.7718	1.44107	Sample_17	AI_export_Plate 1 UNS LN_B2_B02_CD4p_Live.fcs	RIb17_aIL10+aPD1_-1_UNS	aIL10+aPD1	RIb17	minus_one	aIL10+aPD1_minus_one	UNS	B02
660	Sample_17	3	210	0.164835	9.40355	9.45095	2.48655	Sample_17	AI_export_Plate 1 UNS LN_B2_B02_CD4p_Live.fcs	RIb17_aIL10+aPD1_-1_UNS	aIL10+aPD1	RIb17	minus_one	aIL10+aPD1_minus_one	UNS	B02
661	Sample_17	4	121	0.0949765	18.8259	18.7743	3.71197	Sample_17	AI_export_Plate 1 UNS LN_B2_B02_CD4p_Live.fcs	RIb17_aIL10+aPD1_-1_UNS	aIL10+aPD1	RIb17	minus_one	aIL10+aPD1_minus_one	UNS	B02
662	Sample_17	5	84	0.0659341	22.6098	22.7433	2.1058	Sample_17	AI_export_Plate 1 UNS LN_B2_B02_CD4p_Live.fcs	RIb17_aIL10+aPD1_-1_UNS	aIL10+aPD1	RIb17	minus_one	aIL10+aPD1_minus_one	UNS	B02
663	Sample_17	6	246	0.193093	5.61524	5.64732	1.8771	Sample_17	AI_export_Plate 1 UNS LN_B2_B02_CD4p_Live.fcs	RIb17_aIL10+aPD1_-1_UNS	aIL10+aPD1	RIb17	minus_one	aIL10+aPD1_minus_one	UNS	B02
664	Sample_17	7	47	0.0368917	19.6293	20.3545	1.55899	Sample_17	AI_export_Plate 1 UNS LN_B2_B02_CD4p_Live.fcs	RIb17_aIL10+aPD1_-1_UNS	aIL10+aPD1	RIb17	minus_one	aIL10+aPD1_minus_one	UNS	B02
665	Sample_17	8	15	0.0117739	26.0547	26.1639	0.365613	Sample_17	AI_export_Plate 1 UNS LN_B2_B02_CD4p_Live.fcs	RIb17_aIL10+aPD1_-1_UNS	aIL10+aPD1	RIb17	minus_one	aIL10+aPD1_minus_one	UNS	B02
666	Sample_17	9	18	0.0141287	17.8895	23.5609	7.91744	Sample_17	AI_export_Plate 1 UNS LN_B2_B02_CD4p_Live.fcs	RIb17_aIL10+aPD1_-1_UNS	aIL10+aPD1	RIb17	minus_one	aIL10+aPD1_minus_one	UNS	B02
667	Sample_18	1	239	0.187598	4.48051	4.91205	2.53587	Sample_18	AI_export_Plate 1 UNS LN_B3_B03_CD4p_Live.fcs	RFl17_aIL10+aPD1_7_UNS	aIL10+aPD1	RFl17	seven	aIL10+aPD1_seven	UNS	B03
668	Sample_18	10	177	0.138932	15.0222	15.0339	1.57709	Sample_18	AI_export_Plate 1 UNS LN_B3_B03_CD4p_Live.fcs	RFl17_aIL10+aPD1_7_UNS	aIL10+aPD1	RFl17	seven	aIL10+aPD1_seven	UNS	B03
669	Sample_18	11	10	0.00784929	27.3096	27.557	0.530213	Sample_18	AI_export_Plate 1 UNS LN_B3_B03_CD4p_Live.fcs	RFl17_aIL10+aPD1_7_UNS	aIL10+aPD1	RFl17	seven	aIL10+aPD1_seven	UNS	B03
670	Sample_18	12	10	0.00784929	9.07518	9.61122	1.11951	Sample_18	AI_export_Plate 1 UNS LN_B3_B03_CD4p_Live.fcs	RFl17_aIL10+aPD1_7_UNS	aIL10+aPD1	RFl17	seven	aIL10+aPD1_seven	UNS	B03
671	Sample_18	13	28	0.021978	17.5074	17.4779	2.8114	Sample_18	AI_export_Plate 1 UNS LN_B3_B03_CD4p_Live.fcs	RFl17_aIL10+aPD1_7_UNS	aIL10+aPD1	RFl17	seven	aIL10+aPD1_seven	UNS	B03
672	Sample_18	14	0	0	NA	NA	NA	Sample_18	AI_export_Plate 1 UNS LN_B3_B03_CD4p_Live.fcs	RFl17_aIL10+aPD1_7_UNS	aIL10+aPD1	RFl17	seven	aIL10+aPD1_seven	UNS	B03
673	Sample_18	15	1	0.000784929	NA	NA	NA	Sample_18	AI_export_Plate 1 UNS LN_B3_B03_CD4p_Live.fcs	RFl17_aIL10+aPD1_7_UNS	aIL10+aPD1	RFl17	seven	aIL10+aPD1_seven	UNS	B03
674	Sample_18	16	3	0.00235479	27.1939	27.1425	0.114857	Sample_18	AI_export_Plate 1 UNS LN_B3_B03_CD4p_Live.fcs	RFl17_aIL10+aPD1_7_UNS	aIL10+aPD1	RFl17	seven	aIL10+aPD1_seven	UNS	B03
675	Sample_18	17	0	0	NA	NA	NA	Sample_18	AI_export_Plate 1 UNS LN_B3_B03_CD4p_Live.fcs	RFl17_aIL10+aPD1_7_UNS	aIL10+aPD1	RFl17	seven	aIL10+aPD1_seven	UNS	B03
676	Sample_18	18	1	0.000784929	NA	NA	NA	Sample_18	AI_export_Plate 1 UNS LN_B3_B03_CD4p_Live.fcs	RFl17_aIL10+aPD1_7_UNS	aIL10+aPD1	RFl17	seven	aIL10+aPD1_seven	UNS	B03
677	Sample_18	2	61	0.0478807	4.03269	3.74147	1.48677	Sample_18	AI_export_Plate 1 UNS LN_B3_B03_CD4p_Live.fcs	RFl17_aIL10+aPD1_7_UNS	aIL10+aPD1	RFl17	seven	aIL10+aPD1_seven	UNS	B03
678	Sample_18	3	214	0.167975	9.7503	9.64796	2.31773	Sample_18	AI_export_Plate 1 UNS LN_B3_B03_CD4p_Live.fcs	RFl17_aIL10+aPD1_7_UNS	aIL10+aPD1	RFl17	seven	aIL10+aPD1_seven	UNS	B03
679	Sample_18	4	133	0.104396	18.8779	18.9624	2.80279	Sample_18	AI_export_Plate 1 UNS LN_B3_B03_CD4p_Live.fcs	RFl17_aIL10+aPD1_7_UNS	aIL10+aPD1	RFl17	seven	aIL10+aPD1_seven	UNS	B03
680	Sample_18	5	98	0.0769231	22.3691	22.7177	2.23046	Sample_18	AI_export_Plate 1 UNS LN_B3_B03_CD4p_Live.fcs	RFl17_aIL10+aPD1_7_UNS	aIL10+aPD1	RFl17	seven	aIL10+aPD1_seven	UNS	B03
681	Sample_18	6	211	0.16562	5.75426	5.7678	1.05641	Sample_18	AI_export_Plate 1 UNS LN_B3_B03_CD4p_Live.fcs	RFl17_aIL10+aPD1_7_UNS	aIL10+aPD1	RFl17	seven	aIL10+aPD1_seven	UNS	B03
682	Sample_18	7	39	0.0306122	18.129	20.2419	4.61404	Sample_18	AI_export_Plate 1 UNS LN_B3_B03_CD4p_Live.fcs	RFl17_aIL10+aPD1_7_UNS	aIL10+aPD1	RFl17	seven	aIL10+aPD1_seven	UNS	B03
683	Sample_18	8	17	0.0133438	25.8898	26.0589	0.525323	Sample_18	AI_export_Plate 1 UNS LN_B3_B03_CD4p_Live.fcs	RFl17_aIL10+aPD1_7_UNS	aIL10+aPD1	RFl17	seven	aIL10+aPD1_seven	UNS	B03
684	Sample_18	9	32	0.0251177	22.0164	23.5609	4.6654	Sample_18	AI_export_Plate 1 UNS LN_B3_B03_CD4p_Live.fcs	RFl17_aIL10+aPD1_7_UNS	aIL10+aPD1	RFl17	seven	aIL10+aPD1_seven	UNS	B03
685	Sample_19	1	224	0.175824	3.48723	3.46277	2.10368	Sample_19	AI_export_Plate 1 UNS LN_B4_B04_CD4p_Live.fcs	RYk17_aIL10_7_UNS	aIL10	RYk17	seven	aIL10_seven	UNS	B04
686	Sample_19	10	149	0.116954	15.4915	15.7703	1.44651	Sample_19	AI_export_Plate 1 UNS LN_B4_B04_CD4p_Live.fcs	RYk17_aIL10_7_UNS	aIL10	RYk17	seven	aIL10_seven	UNS	B04
687	Sample_19	11	6	0.00470958	27.0099	27.0241	0.55144	Sample_19	AI_export_Plate 1 UNS LN_B4_B04_CD4p_Live.fcs	RYk17_aIL10_7_UNS	aIL10	RYk17	seven	aIL10_seven	UNS	B04
688	Sample_19	12	4	0.00313972	11.4336	8.40497	6.4436	Sample_19	AI_export_Plate 1 UNS LN_B4_B04_CD4p_Live.fcs	RYk17_aIL10_7_UNS	aIL10	RYk17	seven	aIL10_seven	UNS	B04
689	Sample_19	13	13	0.0102041	18.6362	17.4779	1.72339	Sample_19	AI_export_Plate 1 UNS LN_B4_B04_CD4p_Live.fcs	RYk17_aIL10_7_UNS	aIL10	RYk17	seven	aIL10_seven	UNS	B04
690	Sample_19	14	1	0.000784929	27.342	27.342	NA	Sample_19	AI_export_Plate 1 UNS LN_B4_B04_CD4p_Live.fcs	RYk17_aIL10_7_UNS	aIL10	RYk17	seven	aIL10_seven	UNS	B04
691	Sample_19	15	1	0.000784929	NA	NA	NA	Sample_19	AI_export_Plate 1 UNS LN_B4_B04_CD4p_Live.fcs	RYk17_aIL10_7_UNS	aIL10	RYk17	seven	aIL10_seven	UNS	B04
692	Sample_19	16	1	0.000784929	26.6741	26.6741	NA	Sample_19	AI_export_Plate 1 UNS LN_B4_B04_CD4p_Live.fcs	RYk17_aIL10_7_UNS	aIL10	RYk17	seven	aIL10_seven	UNS	B04
693	Sample_19	17	0	0	NA	NA	NA	Sample_19	AI_export_Plate 1 UNS LN_B4_B04_CD4p_Live.fcs	RYk17_aIL10_7_UNS	aIL10	RYk17	seven	aIL10_seven	UNS	B04
694	Sample_19	18	0	0	NA	NA	NA	Sample_19	AI_export_Plate 1 UNS LN_B4_B04_CD4p_Live.fcs	RYk17_aIL10_7_UNS	aIL10	RYk17	seven	aIL10_seven	UNS	B04
695	Sample_19	2	199	0.156201	3.61293	3.51101	1.19612	Sample_19	AI_export_Plate 1 UNS LN_B4_B04_CD4p_Live.fcs	RYk17_aIL10_7_UNS	aIL10	RYk17	seven	aIL10_seven	UNS	B04
696	Sample_19	3	199	0.156201	9.71408	9.6985	2.66488	Sample_19	AI_export_Plate 1 UNS LN_B4_B04_CD4p_Live.fcs	RYk17_aIL10_7_UNS	aIL10	RYk17	seven	aIL10_seven	UNS	B04
697	Sample_19	4	145	0.113815	19.5271	19.6097	3.54583	Sample_19	AI_export_Plate 1 UNS LN_B4_B04_CD4p_Live.fcs	RYk17_aIL10_7_UNS	aIL10	RYk17	seven	aIL10_seven	UNS	B04
698	Sample_19	5	105	0.0824176	22.6679	22.7177	1.74849	Sample_19	AI_export_Plate 1 UNS LN_B4_B04_CD4p_Live.fcs	RYk17_aIL10_7_UNS	aIL10	RYk17	seven	aIL10_seven	UNS	B04
699	Sample_19	6	158	0.124019	5.18331	5.40162	1.35466	Sample_19	AI_export_Plate 1 UNS LN_B4_B04_CD4p_Live.fcs	RYk17_aIL10_7_UNS	aIL10	RYk17	seven	aIL10_seven	UNS	B04
700	Sample_19	7	37	0.0290424	18.8284	20.3545	3.70361	Sample_19	AI_export_Plate 1 UNS LN_B4_B04_CD4p_Live.fcs	RYk17_aIL10_7_UNS	aIL10	RYk17	seven	aIL10_seven	UNS	B04
701	Sample_19	8	21	0.0164835	25.4751	25.5918	0.99848	Sample_19	AI_export_Plate 1 UNS LN_B4_B04_CD4p_Live.fcs	RYk17_aIL10_7_UNS	aIL10	RYk17	seven	aIL10_seven	UNS	B04
702	Sample_19	9	11	0.00863422	17.5353	23.3095	7.45882	Sample_19	AI_export_Plate 1 UNS LN_B4_B04_CD4p_Live.fcs	RYk17_aIL10_7_UNS	aIL10	RYk17	seven	aIL10_seven	UNS	B04
703	Sample_2	1	105	0.0824176	4.01107	3.7671	3.57554	Sample_2	AI_export_Plate 1 UNS LN_A10_A10_CD4p_Live.fcs	RFn17_aIL10_-1_UNS	aIL10	RFn17	minus_one	aIL10_minus_one	UNS	A10
704	Sample_2	10	238	0.186813	14.9444	14.7532	1.37488	Sample_2	AI_export_Plate 1 UNS LN_A10_A10_CD4p_Live.fcs	RFn17_aIL10_-1_UNS	aIL10	RFn17	minus_one	aIL10_minus_one	UNS	A10
705	Sample_2	11	9	0.00706436	27.3278	27.557	0.406596	Sample_2	AI_export_Plate 1 UNS LN_A10_A10_CD4p_Live.fcs	RFn17_aIL10_-1_UNS	aIL10	RFn17	minus_one	aIL10_minus_one	UNS	A10
706	Sample_2	12	17	0.0133438	9.23989	9.61245	1.00415	Sample_2	AI_export_Plate 1 UNS LN_A10_A10_CD4p_Live.fcs	RFn17_aIL10_-1_UNS	aIL10	RFn17	minus_one	aIL10_minus_one	UNS	A10
707	Sample_2	13	12	0.00941915	18.9298	17.4779	4.60124	Sample_2	AI_export_Plate 1 UNS LN_A10_A10_CD4p_Live.fcs	RFn17_aIL10_-1_UNS	aIL10	RFn17	minus_one	aIL10_minus_one	UNS	A10
708	Sample_2	14	0	0	NA	NA	NA	Sample_2	AI_export_Plate 1 UNS LN_A10_A10_CD4p_Live.fcs	RFn17_aIL10_-1_UNS	aIL10	RFn17	minus_one	aIL10_minus_one	UNS	A10
709	Sample_2	15	0	0	NA	NA	NA	Sample_2	AI_export_Plate 1 UNS LN_A10_A10_CD4p_Live.fcs	RFn17_aIL10_-1_UNS	aIL10	RFn17	minus_one	aIL10_minus_one	UNS	A10
710	Sample_2	16	0	0	NA	NA	NA	Sample_2	AI_export_Plate 1 UNS LN_A10_A10_CD4p_Live.fcs	RFn17_aIL10_-1_UNS	aIL10	RFn17	minus_one	aIL10_minus_one	UNS	A10
711	Sample_2	17	0	0	NA	NA	NA	Sample_2	AI_export_Plate 1 UNS LN_A10_A10_CD4p_Live.fcs	RFn17_aIL10_-1_UNS	aIL10	RFn17	minus_one	aIL10_minus_one	UNS	A10
712	Sample_2	18	0	0	NA	NA	NA	Sample_2	AI_export_Plate 1 UNS LN_A10_A10_CD4p_Live.fcs	RFn17_aIL10_-1_UNS	aIL10	RFn17	minus_one	aIL10_minus_one	UNS	A10
713	Sample_2	2	94	0.0737834	3.76523	3.3676	1.86657	Sample_2	AI_export_Plate 1 UNS LN_A10_A10_CD4p_Live.fcs	RFn17_aIL10_-1_UNS	aIL10	RFn17	minus_one	aIL10_minus_one	UNS	A10
714	Sample_2	3	390	0.306122	10.0079	10.0707	1.7122	Sample_2	AI_export_Plate 1 UNS LN_A10_A10_CD4p_Live.fcs	RFn17_aIL10_-1_UNS	aIL10	RFn17	minus_one	aIL10_minus_one	UNS	A10
715	Sample_2	4	171	0.134223	18.6696	18.7743	2.78548	Sample_2	AI_export_Plate 1 UNS LN_A10_A10_CD4p_Live.fcs	RFn17_aIL10_-1_UNS	aIL10	RFn17	minus_one	aIL10_minus_one	UNS	A10
716	Sample_2	5	104	0.0816327	22.7135	22.7177	2.18059	Sample_2	AI_export_Plate 1 UNS LN_A10_A10_CD4p_Live.fcs	RFn17_aIL10_-1_UNS	aIL10	RFn17	minus_one	aIL10_minus_one	UNS	A10
717	Sample_2	6	52	0.0408163	5.59933	5.64732	1.45254	Sample_2	AI_export_Plate 1 UNS LN_A10_A10_CD4p_Live.fcs	RFn17_aIL10_-1_UNS	aIL10	RFn17	minus_one	aIL10_minus_one	UNS	A10
718	Sample_2	7	25	0.0196232	17.4941	18.1216	4.59195	Sample_2	AI_export_Plate 1 UNS LN_A10_A10_CD4p_Live.fcs	RFn17_aIL10_-1_UNS	aIL10	RFn17	minus_one	aIL10_minus_one	UNS	A10
719	Sample_2	8	39	0.0306122	25.7694	25.8357	0.456746	Sample_2	AI_export_Plate 1 UNS LN_A10_A10_CD4p_Live.fcs	RFn17_aIL10_-1_UNS	aIL10	RFn17	minus_one	aIL10_minus_one	UNS	A10
720	Sample_2	9	18	0.0141287	17.0604	23.3095	8.0906	Sample_2	AI_export_Plate 1 UNS LN_A10_A10_CD4p_Live.fcs	RFn17_aIL10_-1_UNS	aIL10	RFn17	minus_one	aIL10_minus_one	UNS	A10
721	Sample_20	1	274	0.215071	3.78818	3.78358	2.19274	Sample_20	AI_export_Plate 1 UNS LN_B5_B05_CD4p_Live.fcs	RVz16_Control_7_UNS	Control	RVz16	seven	Control_seven	UNS	B05
722	Sample_20	10	220	0.172684	15.1748	15.5226	1.98457	Sample_20	AI_export_Plate 1 UNS LN_B5_B05_CD4p_Live.fcs	RVz16_Control_7_UNS	Control	RVz16	seven	Control_seven	UNS	B05
723	Sample_20	11	6	0.00470958	27.4777	27.557	0.177272	Sample_20	AI_export_Plate 1 UNS LN_B5_B05_CD4p_Live.fcs	RVz16_Control_7_UNS	Control	RVz16	seven	Control_seven	UNS	B05
724	Sample_20	12	6	0.00470958	11.2967	9.54093	6.66125	Sample_20	AI_export_Plate 1 UNS LN_B5_B05_CD4p_Live.fcs	RVz16_Control_7_UNS	Control	RVz16	seven	Control_seven	UNS	B05
725	Sample_20	13	9	0.00706436	16.1405	17.4779	3.91829	Sample_20	AI_export_Plate 1 UNS LN_B5_B05_CD4p_Live.fcs	RVz16_Control_7_UNS	Control	RVz16	seven	Control_seven	UNS	B05
726	Sample_20	14	3	0.00235479	26.9119	26.9119	0.608356	Sample_20	AI_export_Plate 1 UNS LN_B5_B05_CD4p_Live.fcs	RVz16_Control_7_UNS	Control	RVz16	seven	Control_seven	UNS	B05
727	Sample_20	15	0	0	NA	NA	NA	Sample_20	AI_export_Plate 1 UNS LN_B5_B05_CD4p_Live.fcs	RVz16_Control_7_UNS	Control	RVz16	seven	Control_seven	UNS	B05
728	Sample_20	16	1	0.000784929	27.3497	27.3497	NA	Sample_20	AI_export_Plate 1 UNS LN_B5_B05_CD4p_Live.fcs	RVz16_Control_7_UNS	Control	RVz16	seven	Control_seven	UNS	B05
729	Sample_20	17	2	0.00156986	NA	NA	NA	Sample_20	AI_export_Plate 1 UNS LN_B5_B05_CD4p_Live.fcs	RVz16_Control_7_UNS	Control	RVz16	seven	Control_seven	UNS	B05
730	Sample_20	18	1	0.000784929	NA	NA	NA	Sample_20	AI_export_Plate 1 UNS LN_B5_B05_CD4p_Live.fcs	RVz16_Control_7_UNS	Control	RVz16	seven	Control_seven	UNS	B05
731	Sample_20	2	164	0.128728	3.57204	3.3013	1.69853	Sample_20	AI_export_Plate 1 UNS LN_B5_B05_CD4p_Live.fcs	RVz16_Control_7_UNS	Control	RVz16	seven	Control_seven	UNS	B05
732	Sample_20	3	167	0.131083	9.87971	9.92189	2.44293	Sample_20	AI_export_Plate 1 UNS LN_B5_B05_CD4p_Live.fcs	RVz16_Control_7_UNS	Control	RVz16	seven	Control_seven	UNS	B05
733	Sample_20	4	105	0.0824176	18.7049	18.7743	3.59634	Sample_20	AI_export_Plate 1 UNS LN_B5_B05_CD4p_Live.fcs	RVz16_Control_7_UNS	Control	RVz16	seven	Control_seven	UNS	B05
734	Sample_20	5	71	0.05573	22.5831	22.8489	3.06223	Sample_20	AI_export_Plate 1 UNS LN_B5_B05_CD4p_Live.fcs	RVz16_Control_7_UNS	Control	RVz16	seven	Control_seven	UNS	B05
735	Sample_20	6	160	0.125589	5.63583	5.64732	1.45805	Sample_20	AI_export_Plate 1 UNS LN_B5_B05_CD4p_Live.fcs	RVz16_Control_7_UNS	Control	RVz16	seven	Control_seven	UNS	B05
736	Sample_20	7	42	0.032967	18.1711	18.291	3.43349	Sample_20	AI_export_Plate 1 UNS LN_B5_B05_CD4p_Live.fcs	RVz16_Control_7_UNS	Control	RVz16	seven	Control_seven	UNS	B05
737	Sample_20	8	12	0.00941915	25.5089	25.8124	1.19589	Sample_20	AI_export_Plate 1 UNS LN_B5_B05_CD4p_Live.fcs	RVz16_Control_7_UNS	Control	RVz16	seven	Control_seven	UNS	B05
738	Sample_20	9	31	0.0243328	18.9967	23.5609	7.31585	Sample_20	AI_export_Plate 1 UNS LN_B5_B05_CD4p_Live.fcs	RVz16_Control_7_UNS	Control	RVz16	seven	Control_seven	UNS	B05
739	Sample_21	1	207	0.16248	3.67574	3.65595	2.19368	Sample_21	AI_export_Plate 1 UNS LN_B6_B06_CD4p_Live.fcs	RYm17_aIL10+aPD1_7_UNS	aIL10+aPD1	RYm17	seven	aIL10+aPD1_seven	UNS	B06
740	Sample_21	10	168	0.131868	15.2473	15.5604	2.14772	Sample_21	AI_export_Plate 1 UNS LN_B6_B06_CD4p_Live.fcs	RYm17_aIL10+aPD1_7_UNS	aIL10+aPD1	RYm17	seven	aIL10+aPD1_seven	UNS	B06
741	Sample_21	11	13	0.0102041	27.4289	27.557	0.309766	Sample_21	AI_export_Plate 1 UNS LN_B6_B06_CD4p_Live.fcs	RYm17_aIL10+aPD1_7_UNS	aIL10+aPD1	RYm17	seven	aIL10+aPD1_seven	UNS	B06
742	Sample_21	12	4	0.00313972	8.79025	8.93044	0.913871	Sample_21	AI_export_Plate 1 UNS LN_B6_B06_CD4p_Live.fcs	RYm17_aIL10+aPD1_7_UNS	aIL10+aPD1	RYm17	seven	aIL10+aPD1_seven	UNS	B06
743	Sample_21	13	10	0.00784929	19.0634	17.4779	2.97022	Sample_21	AI_export_Plate 1 UNS LN_B6_B06_CD4p_Live.fcs	RYm17_aIL10+aPD1_7_UNS	aIL10+aPD1	RYm17	seven	aIL10+aPD1_seven	UNS	B06
744	Sample_21	14	1	0.000784929	27.342	27.342	NA	Sample_21	AI_export_Plate 1 UNS LN_B6_B06_CD4p_Live.fcs	RYm17_aIL10+aPD1_7_UNS	aIL10+aPD1	RYm17	seven	aIL10+aPD1_seven	UNS	B06
745	Sample_21	15	1	0.000784929	0.641401	0.641401	NA	Sample_21	AI_export_Plate 1 UNS LN_B6_B06_CD4p_Live.fcs	RYm17_aIL10+aPD1_7_UNS	aIL10+aPD1	RYm17	seven	aIL10+aPD1_seven	UNS	B06
746	Sample_21	16	0	0	NA	NA	NA	Sample_21	AI_export_Plate 1 UNS LN_B6_B06_CD4p_Live.fcs	RYm17_aIL10+aPD1_7_UNS	aIL10+aPD1	RYm17	seven	aIL10+aPD1_seven	UNS	B06
747	Sample_21	17	3	0.00235479	NA	NA	NA	Sample_21	AI_export_Plate 1 UNS LN_B6_B06_CD4p_Live.fcs	RYm17_aIL10+aPD1_7_UNS	aIL10+aPD1	RYm17	seven	aIL10+aPD1_seven	UNS	B06
748	Sample_21	18	1	0.000784929	3.58842	3.58842	NA	Sample_21	AI_export_Plate 1 UNS LN_B6_B06_CD4p_Live.fcs	RYm17_aIL10+aPD1_7_UNS	aIL10+aPD1	RYm17	seven	aIL10+aPD1_seven	UNS	B06
749	Sample_21	2	154	0.120879	3.7947	3.37907	1.91357	Sample_21	AI_export_Plate 1 UNS LN_B6_B06_CD4p_Live.fcs	RYm17_aIL10+aPD1_7_UNS	aIL10+aPD1	RYm17	seven	aIL10+aPD1_seven	UNS	B06
750	Sample_21	3	200	0.156986	9.82532	9.74744	2.11711	Sample_21	AI_export_Plate 1 UNS LN_B6_B06_CD4p_Live.fcs	RYm17_aIL10+aPD1_7_UNS	aIL10+aPD1	RYm17	seven	aIL10+aPD1_seven	UNS	B06
751	Sample_21	4	130	0.102041	18.2476	18.5779	2.95175	Sample_21	AI_export_Plate 1 UNS LN_B6_B06_CD4p_Live.fcs	RYm17_aIL10+aPD1_7_UNS	aIL10+aPD1	RYm17	seven	aIL10+aPD1_seven	UNS	B06
752	Sample_21	5	123	0.0965463	23.0584	22.9188	0.648477	Sample_21	AI_export_Plate 1 UNS LN_B6_B06_CD4p_Live.fcs	RYm17_aIL10+aPD1_7_UNS	aIL10+aPD1	RYm17	seven	aIL10+aPD1_seven	UNS	B06
753	Sample_21	6	149	0.116954	5.68027	5.64732	1.50385	Sample_21	AI_export_Plate 1 UNS LN_B6_B06_CD4p_Live.fcs	RYm17_aIL10+aPD1_7_UNS	aIL10+aPD1	RYm17	seven	aIL10+aPD1_seven	UNS	B06
754	Sample_21	7	49	0.0384615	19.2405	18.5779	1.66453	Sample_21	AI_export_Plate 1 UNS LN_B6_B06_CD4p_Live.fcs	RYm17_aIL10+aPD1_7_UNS	aIL10+aPD1	RYm17	seven	aIL10+aPD1_seven	UNS	B06
755	Sample_21	8	25	0.0196232	25.7427	25.8357	0.468621	Sample_21	AI_export_Plate 1 UNS LN_B6_B06_CD4p_Live.fcs	RYm17_aIL10+aPD1_7_UNS	aIL10+aPD1	RYm17	seven	aIL10+aPD1_seven	UNS	B06
756	Sample_21	9	36	0.0282575	18.574	23.5609	7.35092	Sample_21	AI_export_Plate 1 UNS LN_B6_B06_CD4p_Live.fcs	RYm17_aIL10+aPD1_7_UNS	aIL10+aPD1	RYm17	seven	aIL10+aPD1_seven	UNS	B06
757	Sample_22	1	254	0.199372	3.32649	3.18646	2.41467	Sample_22	AI_export_Plate 1 UNS LN_B7_B07_CD4p_Live.fcs	RHm17_aIL10_7_UNS	aIL10	RHm17	seven	aIL10_seven	UNS	B07
758	Sample_22	10	156	0.122449	15.3851	15.7785	1.49912	Sample_22	AI_export_Plate 1 UNS LN_B7_B07_CD4p_Live.fcs	RHm17_aIL10_7_UNS	aIL10	RHm17	seven	aIL10_seven	UNS	B07
759	Sample_22	11	12	0.00941915	27.192	27.3732	0.471466	Sample_22	AI_export_Plate 1 UNS LN_B7_B07_CD4p_Live.fcs	RHm17_aIL10_7_UNS	aIL10	RHm17	seven	aIL10_seven	UNS	B07
760	Sample_22	12	3	0.00235479	14.3514	9.61245	9.96279	Sample_22	AI_export_Plate 1 UNS LN_B7_B07_CD4p_Live.fcs	RHm17_aIL10_7_UNS	aIL10	RHm17	seven	aIL10_seven	UNS	B07
761	Sample_22	13	58	0.0455259	17.8431	17.4779	2.6799	Sample_22	AI_export_Plate 1 UNS LN_B7_B07_CD4p_Live.fcs	RHm17_aIL10_7_UNS	aIL10	RHm17	seven	aIL10_seven	UNS	B07
762	Sample_22	14	0	0	NA	NA	NA	Sample_22	AI_export_Plate 1 UNS LN_B7_B07_CD4p_Live.fcs	RHm17_aIL10_7_UNS	aIL10	RHm17	seven	aIL10_seven	UNS	B07
763	Sample_22	15	0	0	NA	NA	NA	Sample_22	AI_export_Plate 1 UNS LN_B7_B07_CD4p_Live.fcs	RHm17_aIL10_7_UNS	aIL10	RHm17	seven	aIL10_seven	UNS	B07
764	Sample_22	16	0	0	NA	NA	NA	Sample_22	AI_export_Plate 1 UNS LN_B7_B07_CD4p_Live.fcs	RHm17_aIL10_7_UNS	aIL10	RHm17	seven	aIL10_seven	UNS	B07
765	Sample_22	17	0	0	NA	NA	NA	Sample_22	AI_export_Plate 1 UNS LN_B7_B07_CD4p_Live.fcs	RHm17_aIL10_7_UNS	aIL10	RHm17	seven	aIL10_seven	UNS	B07
766	Sample_22	18	0	0	NA	NA	NA	Sample_22	AI_export_Plate 1 UNS LN_B7_B07_CD4p_Live.fcs	RHm17_aIL10_7_UNS	aIL10	RHm17	seven	aIL10_seven	UNS	B07
767	Sample_22	2	142	0.11146	3.51676	3.36871	1.4342	Sample_22	AI_export_Plate 1 UNS LN_B7_B07_CD4p_Live.fcs	RHm17_aIL10_7_UNS	aIL10	RHm17	seven	aIL10_seven	UNS	B07
768	Sample_22	3	153	0.120094	10.1446	10.0788	2.4103	Sample_22	AI_export_Plate 1 UNS LN_B7_B07_CD4p_Live.fcs	RHm17_aIL10_7_UNS	aIL10	RHm17	seven	aIL10_seven	UNS	B07
769	Sample_22	4	145	0.113815	18.5841	18.5779	3.11712	Sample_22	AI_export_Plate 1 UNS LN_B7_B07_CD4p_Live.fcs	RHm17_aIL10_7_UNS	aIL10	RHm17	seven	aIL10_seven	UNS	B07
770	Sample_22	5	114	0.0894819	23.1296	23.3019	0.930299	Sample_22	AI_export_Plate 1 UNS LN_B7_B07_CD4p_Live.fcs	RHm17_aIL10_7_UNS	aIL10	RHm17	seven	aIL10_seven	UNS	B07
771	Sample_22	6	146	0.1146	5.7499	5.82153	1.83741	Sample_22	AI_export_Plate 1 UNS LN_B7_B07_CD4p_Live.fcs	RHm17_aIL10_7_UNS	aIL10	RHm17	seven	aIL10_seven	UNS	B07
772	Sample_22	7	45	0.0353218	18.5975	17.8791	2.30079	Sample_22	AI_export_Plate 1 UNS LN_B7_B07_CD4p_Live.fcs	RHm17_aIL10_7_UNS	aIL10	RHm17	seven	aIL10_seven	UNS	B07
773	Sample_22	8	21	0.0164835	25.9334	26.064	0.466252	Sample_22	AI_export_Plate 1 UNS LN_B7_B07_CD4p_Live.fcs	RHm17_aIL10_7_UNS	aIL10	RHm17	seven	aIL10_seven	UNS	B07
774	Sample_22	9	25	0.0196232	18.4388	23.5609	7.47234	Sample_22	AI_export_Plate 1 UNS LN_B7_B07_CD4p_Live.fcs	RHm17_aIL10_7_UNS	aIL10	RHm17	seven	aIL10_seven	UNS	B07
775	Sample_23	1	209	0.16405	3.89841	3.99131	2.28366	Sample_23	AI_export_Plate 1 UNS LN_B8_B08_CD4p_Live.fcs	RNy16_aIL10+aPD1_7_UNS	aIL10+aPD1	RNy16	seven	aIL10+aPD1_seven	UNS	B08
776	Sample_23	10	93	0.0729984	14.6879	15.2515	2.12096	Sample_23	AI_export_Plate 1 UNS LN_B8_B08_CD4p_Live.fcs	RNy16_aIL10+aPD1_7_UNS	aIL10+aPD1	RNy16	seven	aIL10+aPD1_seven	UNS	B08
777	Sample_23	11	9	0.00706436	27.5198	27.557	0.111567	Sample_23	AI_export_Plate 1 UNS LN_B8_B08_CD4p_Live.fcs	RNy16_aIL10+aPD1_7_UNS	aIL10+aPD1	RNy16	seven	aIL10+aPD1_seven	UNS	B08
778	Sample_23	12	9	0.00706436	11.1125	9.61245	5.06562	Sample_23	AI_export_Plate 1 UNS LN_B8_B08_CD4p_Live.fcs	RNy16_aIL10+aPD1_7_UNS	aIL10+aPD1	RNy16	seven	aIL10+aPD1_seven	UNS	B08
779	Sample_23	13	16	0.0125589	16.4513	17.4779	3.85649	Sample_23	AI_export_Plate 1 UNS LN_B8_B08_CD4p_Live.fcs	RNy16_aIL10+aPD1_7_UNS	aIL10+aPD1	RNy16	seven	aIL10+aPD1_seven	UNS	B08
780	Sample_23	14	1	0.000784929	26.7025	26.7025	NA	Sample_23	AI_export_Plate 1 UNS LN_B8_B08_CD4p_Live.fcs	RNy16_aIL10+aPD1_7_UNS	aIL10+aPD1	RNy16	seven	aIL10+aPD1_seven	UNS	B08
781	Sample_23	15	1	0.000784929	NA	NA	NA	Sample_23	AI_export_Plate 1 UNS LN_B8_B08_CD4p_Live.fcs	RNy16_aIL10+aPD1_7_UNS	aIL10+aPD1	RNy16	seven	aIL10+aPD1_seven	UNS	B08
782	Sample_23	16	2	0.00156986	26.973	26.973	0.38009	Sample_23	AI_export_Plate 1 UNS LN_B8_B08_CD4p_Live.fcs	RNy16_aIL10+aPD1_7_UNS	aIL10+aPD1	RNy16	seven	aIL10+aPD1_seven	UNS	B08
783	Sample_23	17	0	0	NA	NA	NA	Sample_23	AI_export_Plate 1 UNS LN_B8_B08_CD4p_Live.fcs	RNy16_aIL10+aPD1_7_UNS	aIL10+aPD1	RNy16	seven	aIL10+aPD1_seven	UNS	B08
784	Sample_23	18	0	0	NA	NA	NA	Sample_23	AI_export_Plate 1 UNS LN_B8_B08_CD4p_Live.fcs	RNy16_aIL10+aPD1_7_UNS	aIL10+aPD1	RNy16	seven	aIL10+aPD1_seven	UNS	B08
785	Sample_23	2	135	0.105965	3.68666	3.42511	1.82714	Sample_23	AI_export_Plate 1 UNS LN_B8_B08_CD4p_Live.fcs	RNy16_aIL10+aPD1_7_UNS	aIL10+aPD1	RNy16	seven	aIL10+aPD1_seven	UNS	B08
786	Sample_23	3	353	0.27708	9.27808	9.28708	2.33955	Sample_23	AI_export_Plate 1 UNS LN_B8_B08_CD4p_Live.fcs	RNy16_aIL10+aPD1_7_UNS	aIL10+aPD1	RNy16	seven	aIL10+aPD1_seven	UNS	B08
787	Sample_23	4	125	0.0981162	18.8038	18.9488	2.84891	Sample_23	AI_export_Plate 1 UNS LN_B8_B08_CD4p_Live.fcs	RNy16_aIL10+aPD1_7_UNS	aIL10+aPD1	RNy16	seven	aIL10+aPD1_seven	UNS	B08
788	Sample_23	5	56	0.043956	22.3338	22.7177	3.43024	Sample_23	AI_export_Plate 1 UNS LN_B8_B08_CD4p_Live.fcs	RNy16_aIL10+aPD1_7_UNS	aIL10+aPD1	RNy16	seven	aIL10+aPD1_seven	UNS	B08
789	Sample_23	6	157	0.123234	5.62254	5.64732	1.18284	Sample_23	AI_export_Plate 1 UNS LN_B8_B08_CD4p_Live.fcs	RNy16_aIL10+aPD1_7_UNS	aIL10+aPD1	RNy16	seven	aIL10+aPD1_seven	UNS	B08
790	Sample_23	7	54	0.0423862	17.9483	17.7766	3.1497	Sample_23	AI_export_Plate 1 UNS LN_B8_B08_CD4p_Live.fcs	RNy16_aIL10+aPD1_7_UNS	aIL10+aPD1	RNy16	seven	aIL10+aPD1_seven	UNS	B08
791	Sample_23	8	23	0.0180534	25.8057	25.8392	0.470204	Sample_23	AI_export_Plate 1 UNS LN_B8_B08_CD4p_Live.fcs	RNy16_aIL10+aPD1_7_UNS	aIL10+aPD1	RNy16	seven	aIL10+aPD1_seven	UNS	B08
792	Sample_23	9	31	0.0243328	16.4761	23.5609	8.40922	Sample_23	AI_export_Plate 1 UNS LN_B8_B08_CD4p_Live.fcs	RNy16_aIL10+aPD1_7_UNS	aIL10+aPD1	RNy16	seven	aIL10+aPD1_seven	UNS	B08
793	Sample_24	1	199	0.156201	4.20119	4.32356	1.90971	Sample_24	AI_export_Plate 1 UNS LN_C1_C01_CD4p_Live.fcs	RVm17_aIL10_7_UNS	aIL10	RVm17	seven	aIL10_seven	UNS	C01
794	Sample_24	10	153	0.120094	14.9505	14.6322	1.48983	Sample_24	AI_export_Plate 1 UNS LN_C1_C01_CD4p_Live.fcs	RVm17_aIL10_7_UNS	aIL10	RVm17	seven	aIL10_seven	UNS	C01
795	Sample_24	11	23	0.0180534	27.4508	27.557	0.260303	Sample_24	AI_export_Plate 1 UNS LN_C1_C01_CD4p_Live.fcs	RVm17_aIL10_7_UNS	aIL10	RVm17	seven	aIL10_seven	UNS	C01
796	Sample_24	12	8	0.00627943	8.89621	9.41369	1.14196	Sample_24	AI_export_Plate 1 UNS LN_C1_C01_CD4p_Live.fcs	RVm17_aIL10_7_UNS	aIL10	RVm17	seven	aIL10_seven	UNS	C01
797	Sample_24	13	18	0.0141287	18.6748	17.4779	3.15497	Sample_24	AI_export_Plate 1 UNS LN_C1_C01_CD4p_Live.fcs	RVm17_aIL10_7_UNS	aIL10	RVm17	seven	aIL10_seven	UNS	C01
798	Sample_24	14	3	0.00235479	26.9532	27.342	0.673401	Sample_24	AI_export_Plate 1 UNS LN_C1_C01_CD4p_Live.fcs	RVm17_aIL10_7_UNS	aIL10	RVm17	seven	aIL10_seven	UNS	C01
799	Sample_24	15	3	0.00235479	NA	NA	NA	Sample_24	AI_export_Plate 1 UNS LN_C1_C01_CD4p_Live.fcs	RVm17_aIL10_7_UNS	aIL10	RVm17	seven	aIL10_seven	UNS	C01
800	Sample_24	16	2	0.00156986	27.0118	27.0118	0.442958	Sample_24	AI_export_Plate 1 UNS LN_C1_C01_CD4p_Live.fcs	RVm17_aIL10_7_UNS	aIL10	RVm17	seven	aIL10_seven	UNS	C01
801	Sample_24	17	0	0	NA	NA	NA	Sample_24	AI_export_Plate 1 UNS LN_C1_C01_CD4p_Live.fcs	RVm17_aIL10_7_UNS	aIL10	RVm17	seven	aIL10_seven	UNS	C01
802	Sample_24	18	0	0	NA	NA	NA	Sample_24	AI_export_Plate 1 UNS LN_C1_C01_CD4p_Live.fcs	RVm17_aIL10_7_UNS	aIL10	RVm17	seven	aIL10_seven	UNS	C01
803	Sample_24	2	128	0.100471	4.26978	3.71296	2.2515	Sample_24	AI_export_Plate 1 UNS LN_C1_C01_CD4p_Live.fcs	RVm17_aIL10_7_UNS	aIL10	RVm17	seven	aIL10_seven	UNS	C01
804	Sample_24	3	360	0.282575	9.71916	10.0033	2.17895	Sample_24	AI_export_Plate 1 UNS LN_C1_C01_CD4p_Live.fcs	RVm17_aIL10_7_UNS	aIL10	RVm17	seven	aIL10_seven	UNS	C01
805	Sample_24	4	66	0.0518053	17.482	18.5831	3.8865	Sample_24	AI_export_Plate 1 UNS LN_C1_C01_CD4p_Live.fcs	RVm17_aIL10_7_UNS	aIL10	RVm17	seven	aIL10_seven	UNS	C01
806	Sample_24	5	104	0.0816327	22.4428	22.4304	1.53906	Sample_24	AI_export_Plate 1 UNS LN_C1_C01_CD4p_Live.fcs	RVm17_aIL10_7_UNS	aIL10	RVm17	seven	aIL10_seven	UNS	C01
807	Sample_24	6	124	0.0973312	5.65173	5.56396	2.14225	Sample_24	AI_export_Plate 1 UNS LN_C1_C01_CD4p_Live.fcs	RVm17_aIL10_7_UNS	aIL10	RVm17	seven	aIL10_seven	UNS	C01
808	Sample_24	7	49	0.0384615	19.6126	20.4031	3.24614	Sample_24	AI_export_Plate 1 UNS LN_C1_C01_CD4p_Live.fcs	RVm17_aIL10_7_UNS	aIL10	RVm17	seven	aIL10_seven	UNS	C01
809	Sample_24	8	22	0.0172684	25.6776	25.8357	0.885142	Sample_24	AI_export_Plate 1 UNS LN_C1_C01_CD4p_Live.fcs	RVm17_aIL10_7_UNS	aIL10	RVm17	seven	aIL10_seven	UNS	C01
810	Sample_24	9	12	0.00941915	17.9701	23.3095	8.06477	Sample_24	AI_export_Plate 1 UNS LN_C1_C01_CD4p_Live.fcs	RVm17_aIL10_7_UNS	aIL10	RVm17	seven	aIL10_seven	UNS	C01
811	Sample_25	1	227	0.178179	3.37122	2.8926	3.20711	Sample_25	AI_export_Plate 1 UNS LN_C10_C10_CD4p_Live.fcs	RNy16_aIL10+aPD1_12_UNS	aIL10+aPD1	RNy16	twelve	aIL10+aPD1_twelve	UNS	C10
812	Sample_25	10	198	0.155416	14.8897	14.9458	1.82769	Sample_25	AI_export_Plate 1 UNS LN_C10_C10_CD4p_Live.fcs	RNy16_aIL10+aPD1_12_UNS	aIL10+aPD1	RNy16	twelve	aIL10+aPD1_twelve	UNS	C10
813	Sample_25	11	7	0.00549451	24.5203	27.4273	6.95947	Sample_25	AI_export_Plate 1 UNS LN_C10_C10_CD4p_Live.fcs	RNy16_aIL10+aPD1_12_UNS	aIL10+aPD1	RNy16	twelve	aIL10+aPD1_twelve	UNS	C10
814	Sample_25	12	2	0.00156986	8.47083	8.47083	1.61449	Sample_25	AI_export_Plate 1 UNS LN_C10_C10_CD4p_Live.fcs	RNy16_aIL10+aPD1_12_UNS	aIL10+aPD1	RNy16	twelve	aIL10+aPD1_twelve	UNS	C10
815	Sample_25	13	30	0.0235479	17.9245	17.4779	2.25668	Sample_25	AI_export_Plate 1 UNS LN_C10_C10_CD4p_Live.fcs	RNy16_aIL10+aPD1_12_UNS	aIL10+aPD1	RNy16	twelve	aIL10+aPD1_twelve	UNS	C10
816	Sample_25	14	2	0.00156986	26.7589	26.7589	0.824744	Sample_25	AI_export_Plate 1 UNS LN_C10_C10_CD4p_Live.fcs	RNy16_aIL10+aPD1_12_UNS	aIL10+aPD1	RNy16	twelve	aIL10+aPD1_twelve	UNS	C10
817	Sample_25	15	2	0.00156986	NA	NA	NA	Sample_25	AI_export_Plate 1 UNS LN_C10_C10_CD4p_Live.fcs	RNy16_aIL10+aPD1_12_UNS	aIL10+aPD1	RNy16	twelve	aIL10+aPD1_twelve	UNS	C10
818	Sample_25	16	0	0	NA	NA	NA	Sample_25	AI_export_Plate 1 UNS LN_C10_C10_CD4p_Live.fcs	RNy16_aIL10+aPD1_12_UNS	aIL10+aPD1	RNy16	twelve	aIL10+aPD1_twelve	UNS	C10
819	Sample_25	17	0	0	NA	NA	NA	Sample_25	AI_export_Plate 1 UNS LN_C10_C10_CD4p_Live.fcs	RNy16_aIL10+aPD1_12_UNS	aIL10+aPD1	RNy16	twelve	aIL10+aPD1_twelve	UNS	C10
820	Sample_25	18	0	0	NA	NA	NA	Sample_25	AI_export_Plate 1 UNS LN_C10_C10_CD4p_Live.fcs	RNy16_aIL10+aPD1_12_UNS	aIL10+aPD1	RNy16	twelve	aIL10+aPD1_twelve	UNS	C10
821	Sample_25	2	190	0.149137	2.98085	2.76897	1.83609	Sample_25	AI_export_Plate 1 UNS LN_C10_C10_CD4p_Live.fcs	RNy16_aIL10+aPD1_12_UNS	aIL10+aPD1	RNy16	twelve	aIL10+aPD1_twelve	UNS	C10
822	Sample_25	3	190	0.149137	9.6906	9.59862	2.10767	Sample_25	AI_export_Plate 1 UNS LN_C10_C10_CD4p_Live.fcs	RNy16_aIL10+aPD1_12_UNS	aIL10+aPD1	RNy16	twelve	aIL10+aPD1_twelve	UNS	C10
823	Sample_25	4	146	0.1146	18.3077	18.7743	3.29895	Sample_25	AI_export_Plate 1 UNS LN_C10_C10_CD4p_Live.fcs	RNy16_aIL10+aPD1_12_UNS	aIL10+aPD1	RNy16	twelve	aIL10+aPD1_twelve	UNS	C10
824	Sample_25	5	95	0.0745683	23.0238	23.1394	1.0481	Sample_25	AI_export_Plate 1 UNS LN_C10_C10_CD4p_Live.fcs	RNy16_aIL10+aPD1_12_UNS	aIL10+aPD1	RNy16	twelve	aIL10+aPD1_twelve	UNS	C10
825	Sample_25	6	87	0.0682889	6.1299	6.13118	2.12923	Sample_25	AI_export_Plate 1 UNS LN_C10_C10_CD4p_Live.fcs	RNy16_aIL10+aPD1_12_UNS	aIL10+aPD1	RNy16	twelve	aIL10+aPD1_twelve	UNS	C10
826	Sample_25	7	39	0.0306122	18.5243	17.8791	3.19024	Sample_25	AI_export_Plate 1 UNS LN_C10_C10_CD4p_Live.fcs	RNy16_aIL10+aPD1_12_UNS	aIL10+aPD1	RNy16	twelve	aIL10+aPD1_twelve	UNS	C10
827	Sample_25	8	29	0.022763	25.348	25.3758	0.649152	Sample_25	AI_export_Plate 1 UNS LN_C10_C10_CD4p_Live.fcs	RNy16_aIL10+aPD1_12_UNS	aIL10+aPD1	RNy16	twelve	aIL10+aPD1_twelve	UNS	C10
828	Sample_25	9	30	0.0235479	18.8369	23.5609	7.39908	Sample_25	AI_export_Plate 1 UNS LN_C10_C10_CD4p_Live.fcs	RNy16_aIL10+aPD1_12_UNS	aIL10+aPD1	RNy16	twelve	aIL10+aPD1_twelve	UNS	C10
829	Sample_26	1	251	0.197017	3.56057	3.26648	2.99709	Sample_26	AI_export_Plate 1 UNS LN_C11_C11_CD4p_Live.fcs	RTd17_Control_12_UNS	Control	RTd17	twelve	Control_twelve	UNS	C11
830	Sample_26	10	159	0.124804	14.972	15.2949	1.83077	Sample_26	AI_export_Plate 1 UNS LN_C11_C11_CD4p_Live.fcs	RTd17_Control_12_UNS	Control	RTd17	twelve	Control_twelve	UNS	C11
831	Sample_26	11	6	0.00470958	27.2518	27.557	0.501372	Sample_26	AI_export_Plate 1 UNS LN_C11_C11_CD4p_Live.fcs	RTd17_Control_12_UNS	Control	RTd17	twelve	Control_twelve	UNS	C11
832	Sample_26	12	3	0.00235479	9.61245	9.61245	6.95577e-09	Sample_26	AI_export_Plate 1 UNS LN_C11_C11_CD4p_Live.fcs	RTd17_Control_12_UNS	Control	RTd17	twelve	Control_twelve	UNS	C11
833	Sample_26	13	13	0.0102041	19.4081	17.4779	3.43305	Sample_26	AI_export_Plate 1 UNS LN_C11_C11_CD4p_Live.fcs	RTd17_Control_12_UNS	Control	RTd17	twelve	Control_twelve	UNS	C11
834	Sample_26	14	0	0	NA	NA	NA	Sample_26	AI_export_Plate 1 UNS LN_C11_C11_CD4p_Live.fcs	RTd17_Control_12_UNS	Control	RTd17	twelve	Control_twelve	UNS	C11
835	Sample_26	15	1	0.000784929	NA	NA	NA	Sample_26	AI_export_Plate 1 UNS LN_C11_C11_CD4p_Live.fcs	RTd17_Control_12_UNS	Control	RTd17	twelve	Control_twelve	UNS	C11
836	Sample_26	16	1	0.000784929	27.2608	27.2608	NA	Sample_26	AI_export_Plate 1 UNS LN_C11_C11_CD4p_Live.fcs	RTd17_Control_12_UNS	Control	RTd17	twelve	Control_twelve	UNS	C11
837	Sample_26	17	1	0.000784929	20.0696	20.0696	NA	Sample_26	AI_export_Plate 1 UNS LN_C11_C11_CD4p_Live.fcs	RTd17_Control_12_UNS	Control	RTd17	twelve	Control_twelve	UNS	C11
838	Sample_26	18	0	0	NA	NA	NA	Sample_26	AI_export_Plate 1 UNS LN_C11_C11_CD4p_Live.fcs	RTd17_Control_12_UNS	Control	RTd17	twelve	Control_twelve	UNS	C11
839	Sample_26	2	206	0.161695	3.66404	3.24547	2.29439	Sample_26	AI_export_Plate 1 UNS LN_C11_C11_CD4p_Live.fcs	RTd17_Control_12_UNS	Control	RTd17	twelve	Control_twelve	UNS	C11
840	Sample_26	3	183	0.143642	9.57013	9.66326	2.21063	Sample_26	AI_export_Plate 1 UNS LN_C11_C11_CD4p_Live.fcs	RTd17_Control_12_UNS	Control	RTd17	twelve	Control_twelve	UNS	C11
841	Sample_26	4	143	0.112245	18.4902	18.9002	3.31567	Sample_26	AI_export_Plate 1 UNS LN_C11_C11_CD4p_Live.fcs	RTd17_Control_12_UNS	Control	RTd17	twelve	Control_twelve	UNS	C11
842	Sample_26	5	89	0.0698587	22.8101	22.8511	1.62395	Sample_26	AI_export_Plate 1 UNS LN_C11_C11_CD4p_Live.fcs	RTd17_Control_12_UNS	Control	RTd17	twelve	Control_twelve	UNS	C11
843	Sample_26	6	122	0.0957614	5.91888	6.06788	1.93551	Sample_26	AI_export_Plate 1 UNS LN_C11_C11_CD4p_Live.fcs	RTd17_Control_12_UNS	Control	RTd17	twelve	Control_twelve	UNS	C11
844	Sample_26	7	31	0.0243328	19.136	18.1474	1.62411	Sample_26	AI_export_Plate 1 UNS LN_C11_C11_CD4p_Live.fcs	RTd17_Control_12_UNS	Control	RTd17	twelve	Control_twelve	UNS	C11
845	Sample_26	8	33	0.0259027	25.4733	25.5744	0.617346	Sample_26	AI_export_Plate 1 UNS LN_C11_C11_CD4p_Live.fcs	RTd17_Control_12_UNS	Control	RTd17	twelve	Control_twelve	UNS	C11
846	Sample_26	9	32	0.0251177	17.0249	23.3095	8.22187	Sample_26	AI_export_Plate 1 UNS LN_C11_C11_CD4p_Live.fcs	RTd17_Control_12_UNS	Control	RTd17	twelve	Control_twelve	UNS	C11
847	Sample_27	1	260	0.204082	3.13391	2.87823	2.43951	Sample_27	AI_export_Plate 1 UNS LN_C12_C12_CD4p_Live.fcs	34897_aIL10_12_UNS	aIL10	34897	twelve	aIL10_twelve	UNS	C12
848	Sample_27	10	161	0.126374	14.8728	15.0578	1.83641	Sample_27	AI_export_Plate 1 UNS LN_C12_C12_CD4p_Live.fcs	34897_aIL10_12_UNS	aIL10	34897	twelve	aIL10_twelve	UNS	C12
849	Sample_27	11	6	0.00470958	27.5685	27.557	0.0282413	Sample_27	AI_export_Plate 1 UNS LN_C12_C12_CD4p_Live.fcs	34897_aIL10_12_UNS	aIL10	34897	twelve	aIL10_twelve	UNS	C12
850	Sample_27	12	9	0.00706436	9.16188	9.61245	0.913948	Sample_27	AI_export_Plate 1 UNS LN_C12_C12_CD4p_Live.fcs	34897_aIL10_12_UNS	aIL10	34897	twelve	aIL10_twelve	UNS	C12
851	Sample_27	13	14	0.010989	16.9241	17.4779	2.82648	Sample_27	AI_export_Plate 1 UNS LN_C12_C12_CD4p_Live.fcs	34897_aIL10_12_UNS	aIL10	34897	twelve	aIL10_twelve	UNS	C12
852	Sample_27	14	0	0	NA	NA	NA	Sample_27	AI_export_Plate 1 UNS LN_C12_C12_CD4p_Live.fcs	34897_aIL10_12_UNS	aIL10	34897	twelve	aIL10_twelve	UNS	C12
853	Sample_27	15	3	0.00235479	NA	NA	NA	Sample_27	AI_export_Plate 1 UNS LN_C12_C12_CD4p_Live.fcs	34897_aIL10_12_UNS	aIL10	34897	twelve	aIL10_twelve	UNS	C12
854	Sample_27	16	0	0	NA	NA	NA	Sample_27	AI_export_Plate 1 UNS LN_C12_C12_CD4p_Live.fcs	34897_aIL10_12_UNS	aIL10	34897	twelve	aIL10_twelve	UNS	C12
855	Sample_27	17	0	0	NA	NA	NA	Sample_27	AI_export_Plate 1 UNS LN_C12_C12_CD4p_Live.fcs	34897_aIL10_12_UNS	aIL10	34897	twelve	aIL10_twelve	UNS	C12
856	Sample_27	18	0	0	NA	NA	NA	Sample_27	AI_export_Plate 1 UNS LN_C12_C12_CD4p_Live.fcs	34897_aIL10_12_UNS	aIL10	34897	twelve	aIL10_twelve	UNS	C12
857	Sample_27	2	304	0.238619	3.08617	2.86031	2.20517	Sample_27	AI_export_Plate 1 UNS LN_C12_C12_CD4p_Live.fcs	34897_aIL10_12_UNS	aIL10	34897	twelve	aIL10_twelve	UNS	C12
858	Sample_27	3	165	0.129513	9.74714	9.68908	2.339	Sample_27	AI_export_Plate 1 UNS LN_C12_C12_CD4p_Live.fcs	34897_aIL10_12_UNS	aIL10	34897	twelve	aIL10_twelve	UNS	C12
859	Sample_27	4	121	0.0949765	18.8208	19.3378	3.10184	Sample_27	AI_export_Plate 1 UNS LN_C12_C12_CD4p_Live.fcs	34897_aIL10_12_UNS	aIL10	34897	twelve	aIL10_twelve	UNS	C12
860	Sample_27	5	76	0.0596546	23.0921	22.9157	0.830821	Sample_27	AI_export_Plate 1 UNS LN_C12_C12_CD4p_Live.fcs	34897_aIL10_12_UNS	aIL10	34897	twelve	aIL10_twelve	UNS	C12
861	Sample_27	6	101	0.0792779	5.34697	5.6153	1.40612	Sample_27	AI_export_Plate 1 UNS LN_C12_C12_CD4p_Live.fcs	34897_aIL10_12_UNS	aIL10	34897	twelve	aIL10_twelve	UNS	C12
862	Sample_27	7	22	0.0172684	18.0961	17.6839	1.68256	Sample_27	AI_export_Plate 1 UNS LN_C12_C12_CD4p_Live.fcs	34897_aIL10_12_UNS	aIL10	34897	twelve	aIL10_twelve	UNS	C12
863	Sample_27	8	10	0.00784929	25.2908	25.2683	0.785371	Sample_27	AI_export_Plate 1 UNS LN_C12_C12_CD4p_Live.fcs	34897_aIL10_12_UNS	aIL10	34897	twelve	aIL10_twelve	UNS	C12
864	Sample_27	9	22	0.0172684	18.2986	23.5609	7.42049	Sample_27	AI_export_Plate 1 UNS LN_C12_C12_CD4p_Live.fcs	34897_aIL10_12_UNS	aIL10	34897	twelve	aIL10_twelve	UNS	C12
865	Sample_28	1	208	0.163265	4.08756	4.06168	2.16193	Sample_28	AI_export_Plate 1 UNS LN_C2_C02_CD4p_Live.fcs	RBe17_Control_7_UNS	Control	RBe17	seven	Control_seven	UNS	C02
866	Sample_28	10	116	0.0910518	15.0179	14.8558	1.44948	Sample_28	AI_export_Plate 1 UNS LN_C2_C02_CD4p_Live.fcs	RBe17_Control_7_UNS	Control	RBe17	seven	Control_seven	UNS	C02
867	Sample_28	11	5	0.00392465	27.3919	27.5931	0.474394	Sample_28	AI_export_Plate 1 UNS LN_C2_C02_CD4p_Live.fcs	RBe17_Control_7_UNS	Control	RBe17	seven	Control_seven	UNS	C02
868	Sample_28	12	7	0.00549451	8.21508	9.61245	3.62325	Sample_28	AI_export_Plate 1 UNS LN_C2_C02_CD4p_Live.fcs	RBe17_Control_7_UNS	Control	RBe17	seven	Control_seven	UNS	C02
869	Sample_28	13	17	0.0133438	18.8533	17.4779	1.98828	Sample_28	AI_export_Plate 1 UNS LN_C2_C02_CD4p_Live.fcs	RBe17_Control_7_UNS	Control	RBe17	seven	Control_seven	UNS	C02
870	Sample_28	14	1	0.000784929	27.342	27.342	NA	Sample_28	AI_export_Plate 1 UNS LN_C2_C02_CD4p_Live.fcs	RBe17_Control_7_UNS	Control	RBe17	seven	Control_seven	UNS	C02
871	Sample_28	15	1	0.000784929	NA	NA	NA	Sample_28	AI_export_Plate 1 UNS LN_C2_C02_CD4p_Live.fcs	RBe17_Control_7_UNS	Control	RBe17	seven	Control_seven	UNS	C02
872	Sample_28	16	1	0.000784929	26.7333	26.7333	NA	Sample_28	AI_export_Plate 1 UNS LN_C2_C02_CD4p_Live.fcs	RBe17_Control_7_UNS	Control	RBe17	seven	Control_seven	UNS	C02
873	Sample_28	17	2	0.00156986	8.27341	8.27341	NA	Sample_28	AI_export_Plate 1 UNS LN_C2_C02_CD4p_Live.fcs	RBe17_Control_7_UNS	Control	RBe17	seven	Control_seven	UNS	C02
874	Sample_28	18	0	0	NA	NA	NA	Sample_28	AI_export_Plate 1 UNS LN_C2_C02_CD4p_Live.fcs	RBe17_Control_7_UNS	Control	RBe17	seven	Control_seven	UNS	C02
875	Sample_28	2	95	0.0745683	3.91895	3.63408	1.85181	Sample_28	AI_export_Plate 1 UNS LN_C2_C02_CD4p_Live.fcs	RBe17_Control_7_UNS	Control	RBe17	seven	Control_seven	UNS	C02
876	Sample_28	3	262	0.205651	9.98807	10.0591	2.08732	Sample_28	AI_export_Plate 1 UNS LN_C2_C02_CD4p_Live.fcs	RBe17_Control_7_UNS	Control	RBe17	seven	Control_seven	UNS	C02
877	Sample_28	4	141	0.110675	18.2498	18.5779	3.25056	Sample_28	AI_export_Plate 1 UNS LN_C2_C02_CD4p_Live.fcs	RBe17_Control_7_UNS	Control	RBe17	seven	Control_seven	UNS	C02
878	Sample_28	5	166	0.130298	22.8444	23.173	2.16077	Sample_28	AI_export_Plate 1 UNS LN_C2_C02_CD4p_Live.fcs	RBe17_Control_7_UNS	Control	RBe17	seven	Control_seven	UNS	C02
879	Sample_28	6	152	0.119309	5.33982	5.53549	1.23944	Sample_28	AI_export_Plate 1 UNS LN_C2_C02_CD4p_Live.fcs	RBe17_Control_7_UNS	Control	RBe17	seven	Control_seven	UNS	C02
880	Sample_28	7	35	0.0274725	18.2974	18.4885	3.95658	Sample_28	AI_export_Plate 1 UNS LN_C2_C02_CD4p_Live.fcs	RBe17_Control_7_UNS	Control	RBe17	seven	Control_seven	UNS	C02
881	Sample_28	8	47	0.0368917	25.4834	25.7964	0.782721	Sample_28	AI_export_Plate 1 UNS LN_C2_C02_CD4p_Live.fcs	RBe17_Control_7_UNS	Control	RBe17	seven	Control_seven	UNS	C02
882	Sample_28	9	18	0.0141287	15.4602	15.8751	8.22434	Sample_28	AI_export_Plate 1 UNS LN_C2_C02_CD4p_Live.fcs	RBe17_Control_7_UNS	Control	RBe17	seven	Control_seven	UNS	C02
883	Sample_29	1	346	0.271586	3.83689	3.76668	2.56352	Sample_29	AI_export_Plate 1 UNS LN_C3_C03_CD4p_Live.fcs	RMl17_Control_7_UNS	Control	RMl17	seven	Control_seven	UNS	C03
884	Sample_29	10	142	0.11146	14.655	14.6009	1.79033	Sample_29	AI_export_Plate 1 UNS LN_C3_C03_CD4p_Live.fcs	RMl17_Control_7_UNS	Control	RMl17	seven	Control_seven	UNS	C03
885	Sample_29	11	7	0.00549451	27.5533	27.557	0.0781429	Sample_29	AI_export_Plate 1 UNS LN_C3_C03_CD4p_Live.fcs	RMl17_Control_7_UNS	Control	RMl17	seven	Control_seven	UNS	C03
886	Sample_29	12	14	0.010989	9.25832	9.61245	0.889628	Sample_29	AI_export_Plate 1 UNS LN_C3_C03_CD4p_Live.fcs	RMl17_Control_7_UNS	Control	RMl17	seven	Control_seven	UNS	C03
887	Sample_29	13	10	0.00784929	19.2097	18.9996	1.92124	Sample_29	AI_export_Plate 1 UNS LN_C3_C03_CD4p_Live.fcs	RMl17_Control_7_UNS	Control	RMl17	seven	Control_seven	UNS	C03
888	Sample_29	14	0	0	NA	NA	NA	Sample_29	AI_export_Plate 1 UNS LN_C3_C03_CD4p_Live.fcs	RMl17_Control_7_UNS	Control	RMl17	seven	Control_seven	UNS	C03
889	Sample_29	15	0	0	NA	NA	NA	Sample_29	AI_export_Plate 1 UNS LN_C3_C03_CD4p_Live.fcs	RMl17_Control_7_UNS	Control	RMl17	seven	Control_seven	UNS	C03
890	Sample_29	16	0	0	NA	NA	NA	Sample_29	AI_export_Plate 1 UNS LN_C3_C03_CD4p_Live.fcs	RMl17_Control_7_UNS	Control	RMl17	seven	Control_seven	UNS	C03
891	Sample_29	17	1	0.000784929	NA	NA	NA	Sample_29	AI_export_Plate 1 UNS LN_C3_C03_CD4p_Live.fcs	RMl17_Control_7_UNS	Control	RMl17	seven	Control_seven	UNS	C03
892	Sample_29	18	1	0.000784929	3.60455	3.60455	NA	Sample_29	AI_export_Plate 1 UNS LN_C3_C03_CD4p_Live.fcs	RMl17_Control_7_UNS	Control	RMl17	seven	Control_seven	UNS	C03
893	Sample_29	2	137	0.107535	3.63708	3.40156	1.79829	Sample_29	AI_export_Plate 1 UNS LN_C3_C03_CD4p_Live.fcs	RMl17_Control_7_UNS	Control	RMl17	seven	Control_seven	UNS	C03
894	Sample_29	3	174	0.136578	9.84686	9.94125	2.2162	Sample_29	AI_export_Plate 1 UNS LN_C3_C03_CD4p_Live.fcs	RMl17_Control_7_UNS	Control	RMl17	seven	Control_seven	UNS	C03
895	Sample_29	4	131	0.102826	18.5691	18.5779	3.0515	Sample_29	AI_export_Plate 1 UNS LN_C3_C03_CD4p_Live.fcs	RMl17_Control_7_UNS	Control	RMl17	seven	Control_seven	UNS	C03
896	Sample_29	5	54	0.0423862	22.8623	22.7198	0.774904	Sample_29	AI_export_Plate 1 UNS LN_C3_C03_CD4p_Live.fcs	RMl17_Control_7_UNS	Control	RMl17	seven	Control_seven	UNS	C03
897	Sample_29	6	214	0.167975	5.81512	5.89232	2.19326	Sample_29	AI_export_Plate 1 UNS LN_C3_C03_CD4p_Live.fcs	RMl17_Control_7_UNS	Control	RMl17	seven	Control_seven	UNS	C03
898	Sample_29	7	21	0.0164835	17.7626	18.245	3.7752	Sample_29	AI_export_Plate 1 UNS LN_C3_C03_CD4p_Live.fcs	RMl17_Control_7_UNS	Control	RMl17	seven	Control_seven	UNS	C03
899	Sample_29	8	9	0.00706436	26.0639	26.1073	0.325322	Sample_29	AI_export_Plate 1 UNS LN_C3_C03_CD4p_Live.fcs	RMl17_Control_7_UNS	Control	RMl17	seven	Control_seven	UNS	C03
900	Sample_29	9	13	0.0102041	18.6175	23.5609	7.72077	Sample_29	AI_export_Plate 1 UNS LN_C3_C03_CD4p_Live.fcs	RMl17_Control_7_UNS	Control	RMl17	seven	Control_seven	UNS	C03
901	Sample_3	1	177	0.138932	3.388	3.42348	2.23847	Sample_3	AI_export_Plate 1 UNS LN_A11_A11_CD4p_Live.fcs	RVm17_aIL10_-1_UNS	aIL10	RVm17	minus_one	aIL10_minus_one	UNS	A11
902	Sample_3	10	159	0.124804	14.9035	14.7033	1.59732	Sample_3	AI_export_Plate 1 UNS LN_A11_A11_CD4p_Live.fcs	RVm17_aIL10_-1_UNS	aIL10	RVm17	minus_one	aIL10_minus_one	UNS	A11
903	Sample_3	11	24	0.0188383	27.226	27.557	0.753853	Sample_3	AI_export_Plate 1 UNS LN_A11_A11_CD4p_Live.fcs	RVm17_aIL10_-1_UNS	aIL10	RVm17	minus_one	aIL10_minus_one	UNS	A11
904	Sample_3	12	9	0.00706436	8.61349	9.23794	1.28926	Sample_3	AI_export_Plate 1 UNS LN_A11_A11_CD4p_Live.fcs	RVm17_aIL10_-1_UNS	aIL10	RVm17	minus_one	aIL10_minus_one	UNS	A11
905	Sample_3	13	20	0.0156986	17.8931	17.4779	3.33907	Sample_3	AI_export_Plate 1 UNS LN_A11_A11_CD4p_Live.fcs	RVm17_aIL10_-1_UNS	aIL10	RVm17	minus_one	aIL10_minus_one	UNS	A11
906	Sample_3	14	0	0	NA	NA	NA	Sample_3	AI_export_Plate 1 UNS LN_A11_A11_CD4p_Live.fcs	RVm17_aIL10_-1_UNS	aIL10	RVm17	minus_one	aIL10_minus_one	UNS	A11
907	Sample_3	15	5	0.00392465	NA	NA	NA	Sample_3	AI_export_Plate 1 UNS LN_A11_A11_CD4p_Live.fcs	RVm17_aIL10_-1_UNS	aIL10	RVm17	minus_one	aIL10_minus_one	UNS	A11
908	Sample_3	16	2	0.00156986	26.8282	26.8282	0.0487803	Sample_3	AI_export_Plate 1 UNS LN_A11_A11_CD4p_Live.fcs	RVm17_aIL10_-1_UNS	aIL10	RVm17	minus_one	aIL10_minus_one	UNS	A11
909	Sample_3	17	1	0.000784929	NA	NA	NA	Sample_3	AI_export_Plate 1 UNS LN_A11_A11_CD4p_Live.fcs	RVm17_aIL10_-1_UNS	aIL10	RVm17	minus_one	aIL10_minus_one	UNS	A11
910	Sample_3	18	2	0.00156986	3.62572	3.62572	0.0171229	Sample_3	AI_export_Plate 1 UNS LN_A11_A11_CD4p_Live.fcs	RVm17_aIL10_-1_UNS	aIL10	RVm17	minus_one	aIL10_minus_one	UNS	A11
911	Sample_3	2	94	0.0737834	4.12082	3.50216	2.25429	Sample_3	AI_export_Plate 1 UNS LN_A11_A11_CD4p_Live.fcs	RVm17_aIL10_-1_UNS	aIL10	RVm17	minus_one	aIL10_minus_one	UNS	A11
912	Sample_3	3	406	0.318681	9.55752	9.79192	1.9397	Sample_3	AI_export_Plate 1 UNS LN_A11_A11_CD4p_Live.fcs	RVm17_aIL10_-1_UNS	aIL10	RVm17	minus_one	aIL10_minus_one	UNS	A11
913	Sample_3	4	132	0.103611	18.2983	18.5779	3.14478	Sample_3	AI_export_Plate 1 UNS LN_A11_A11_CD4p_Live.fcs	RVm17_aIL10_-1_UNS	aIL10	RVm17	minus_one	aIL10_minus_one	UNS	A11
914	Sample_3	5	91	0.0714286	22.9739	23.2177	1.48854	Sample_3	AI_export_Plate 1 UNS LN_A11_A11_CD4p_Live.fcs	RVm17_aIL10_-1_UNS	aIL10	RVm17	minus_one	aIL10_minus_one	UNS	A11
915	Sample_3	6	62	0.0486656	5.93792	5.58824	3.04979	Sample_3	AI_export_Plate 1 UNS LN_A11_A11_CD4p_Live.fcs	RVm17_aIL10_-1_UNS	aIL10	RVm17	minus_one	aIL10_minus_one	UNS	A11
916	Sample_3	7	28	0.021978	19.1945	20.2539	2.84189	Sample_3	AI_export_Plate 1 UNS LN_A11_A11_CD4p_Live.fcs	RVm17_aIL10_-1_UNS	aIL10	RVm17	minus_one	aIL10_minus_one	UNS	A11
917	Sample_3	8	30	0.0235479	25.7215	25.8357	0.560418	Sample_3	AI_export_Plate 1 UNS LN_A11_A11_CD4p_Live.fcs	RVm17_aIL10_-1_UNS	aIL10	RVm17	minus_one	aIL10_minus_one	UNS	A11
918	Sample_3	9	32	0.0251177	16.698	21.8315	7.89979	Sample_3	AI_export_Plate 1 UNS LN_A11_A11_CD4p_Live.fcs	RVm17_aIL10_-1_UNS	aIL10	RVm17	minus_one	aIL10_minus_one	UNS	A11
919	Sample_30	1	262	0.205651	4.17382	4.31294	2.78551	Sample_30	AI_export_Plate 1 UNS LN_C4_C04_CD4p_Live.fcs	RIb17_aIL10+aPD1_7_UNS	aIL10+aPD1	RIb17	seven	aIL10+aPD1_seven	UNS	C04
920	Sample_30	10	141	0.110675	15.0079	15.2588	1.85316	Sample_30	AI_export_Plate 1 UNS LN_C4_C04_CD4p_Live.fcs	RIb17_aIL10+aPD1_7_UNS	aIL10+aPD1	RIb17	seven	aIL10+aPD1_seven	UNS	C04
921	Sample_30	11	3	0.00235479	27.1986	27.557	0.620841	Sample_30	AI_export_Plate 1 UNS LN_C4_C04_CD4p_Live.fcs	RIb17_aIL10+aPD1_7_UNS	aIL10+aPD1	RIb17	seven	aIL10+aPD1_seven	UNS	C04
922	Sample_30	12	6	0.00470958	7.73236	9.61245	3.84644	Sample_30	AI_export_Plate 1 UNS LN_C4_C04_CD4p_Live.fcs	RIb17_aIL10+aPD1_7_UNS	aIL10+aPD1	RIb17	seven	aIL10+aPD1_seven	UNS	C04
923	Sample_30	13	15	0.0117739	18.2474	17.4779	2.25672	Sample_30	AI_export_Plate 1 UNS LN_C4_C04_CD4p_Live.fcs	RIb17_aIL10+aPD1_7_UNS	aIL10+aPD1	RIb17	seven	aIL10+aPD1_seven	UNS	C04
924	Sample_30	14	0	0	NA	NA	NA	Sample_30	AI_export_Plate 1 UNS LN_C4_C04_CD4p_Live.fcs	RIb17_aIL10+aPD1_7_UNS	aIL10+aPD1	RIb17	seven	aIL10+aPD1_seven	UNS	C04
925	Sample_30	15	1	0.000784929	NA	NA	NA	Sample_30	AI_export_Plate 1 UNS LN_C4_C04_CD4p_Live.fcs	RIb17_aIL10+aPD1_7_UNS	aIL10+aPD1	RIb17	seven	aIL10+aPD1_seven	UNS	C04
926	Sample_30	16	2	0.00156986	27.2913	27.2913	0.0573107	Sample_30	AI_export_Plate 1 UNS LN_C4_C04_CD4p_Live.fcs	RIb17_aIL10+aPD1_7_UNS	aIL10+aPD1	RIb17	seven	aIL10+aPD1_seven	UNS	C04
927	Sample_30	17	2	0.00156986	NA	NA	NA	Sample_30	AI_export_Plate 1 UNS LN_C4_C04_CD4p_Live.fcs	RIb17_aIL10+aPD1_7_UNS	aIL10+aPD1	RIb17	seven	aIL10+aPD1_seven	UNS	C04
928	Sample_30	18	0	0	NA	NA	NA	Sample_30	AI_export_Plate 1 UNS LN_C4_C04_CD4p_Live.fcs	RIb17_aIL10+aPD1_7_UNS	aIL10+aPD1	RIb17	seven	aIL10+aPD1_seven	UNS	C04
929	Sample_30	2	180	0.141287	3.93742	3.403	1.91925	Sample_30	AI_export_Plate 1 UNS LN_C4_C04_CD4p_Live.fcs	RIb17_aIL10+aPD1_7_UNS	aIL10+aPD1	RIb17	seven	aIL10+aPD1_seven	UNS	C04
930	Sample_30	3	191	0.149922	9.77242	9.67357	2.59463	Sample_30	AI_export_Plate 1 UNS LN_C4_C04_CD4p_Live.fcs	RIb17_aIL10+aPD1_7_UNS	aIL10+aPD1	RIb17	seven	aIL10+aPD1_seven	UNS	C04
931	Sample_30	4	138	0.10832	18.8196	18.9624	3.36395	Sample_30	AI_export_Plate 1 UNS LN_C4_C04_CD4p_Live.fcs	RIb17_aIL10+aPD1_7_UNS	aIL10+aPD1	RIb17	seven	aIL10+aPD1_seven	UNS	C04
932	Sample_30	5	88	0.0690738	22.602	22.7584	2.16293	Sample_30	AI_export_Plate 1 UNS LN_C4_C04_CD4p_Live.fcs	RIb17_aIL10+aPD1_7_UNS	aIL10+aPD1	RIb17	seven	aIL10+aPD1_seven	UNS	C04
933	Sample_30	6	185	0.145212	5.52143	5.64732	1.30732	Sample_30	AI_export_Plate 1 UNS LN_C4_C04_CD4p_Live.fcs	RIb17_aIL10+aPD1_7_UNS	aIL10+aPD1	RIb17	seven	aIL10+aPD1_seven	UNS	C04
934	Sample_30	7	25	0.0196232	19.0798	20.3973	4.0005	Sample_30	AI_export_Plate 1 UNS LN_C4_C04_CD4p_Live.fcs	RIb17_aIL10+aPD1_7_UNS	aIL10+aPD1	RIb17	seven	aIL10+aPD1_seven	UNS	C04
935	Sample_30	8	25	0.0196232	25.5174	25.803	0.526529	Sample_30	AI_export_Plate 1 UNS LN_C4_C04_CD4p_Live.fcs	RIb17_aIL10+aPD1_7_UNS	aIL10+aPD1	RIb17	seven	aIL10+aPD1_seven	UNS	C04
936	Sample_30	9	10	0.00784929	23.5358	23.5609	0.0795232	Sample_30	AI_export_Plate 1 UNS LN_C4_C04_CD4p_Live.fcs	RIb17_aIL10+aPD1_7_UNS	aIL10+aPD1	RIb17	seven	aIL10+aPD1_seven	UNS	C04
937	Sample_31	1	267	0.209576	3.08218	2.59641	2.57491	Sample_31	AI_export_Plate 1 UNS LN_C5_C05_CD4p_Live.fcs	RFl17_aIL10+aPD1_12_UNS	aIL10+aPD1	RFl17	twelve	aIL10+aPD1_twelve	UNS	C05
938	Sample_31	10	135	0.105965	15.0014	15.2159	1.75413	Sample_31	AI_export_Plate 1 UNS LN_C5_C05_CD4p_Live.fcs	RFl17_aIL10+aPD1_12_UNS	aIL10+aPD1	RFl17	twelve	aIL10+aPD1_twelve	UNS	C05
939	Sample_31	11	10	0.00784929	27.557	27.557	2.10596e-08	Sample_31	AI_export_Plate 1 UNS LN_C5_C05_CD4p_Live.fcs	RFl17_aIL10+aPD1_12_UNS	aIL10+aPD1	RFl17	twelve	aIL10+aPD1_twelve	UNS	C05
940	Sample_31	12	8	0.00627943	10.116	9.10714	4.511	Sample_31	AI_export_Plate 1 UNS LN_C5_C05_CD4p_Live.fcs	RFl17_aIL10+aPD1_12_UNS	aIL10+aPD1	RFl17	twelve	aIL10+aPD1_twelve	UNS	C05
941	Sample_31	13	28	0.021978	17.8512	17.4779	1.11736	Sample_31	AI_export_Plate 1 UNS LN_C5_C05_CD4p_Live.fcs	RFl17_aIL10+aPD1_12_UNS	aIL10+aPD1	RFl17	twelve	aIL10+aPD1_twelve	UNS	C05
942	Sample_31	14	1	0.000784929	27.342	27.342	NA	Sample_31	AI_export_Plate 1 UNS LN_C5_C05_CD4p_Live.fcs	RFl17_aIL10+aPD1_12_UNS	aIL10+aPD1	RFl17	twelve	aIL10+aPD1_twelve	UNS	C05
943	Sample_31	15	1	0.000784929	NA	NA	NA	Sample_31	AI_export_Plate 1 UNS LN_C5_C05_CD4p_Live.fcs	RFl17_aIL10+aPD1_12_UNS	aIL10+aPD1	RFl17	twelve	aIL10+aPD1_twelve	UNS	C05
944	Sample_31	16	2	0.00156986	27.0016	27.0016	0.463062	Sample_31	AI_export_Plate 1 UNS LN_C5_C05_CD4p_Live.fcs	RFl17_aIL10+aPD1_12_UNS	aIL10+aPD1	RFl17	twelve	aIL10+aPD1_twelve	UNS	C05
945	Sample_31	17	1	0.000784929	19.8017	19.8017	NA	Sample_31	AI_export_Plate 1 UNS LN_C5_C05_CD4p_Live.fcs	RFl17_aIL10+aPD1_12_UNS	aIL10+aPD1	RFl17	twelve	aIL10+aPD1_twelve	UNS	C05
946	Sample_31	18	2	0.00156986	3.62262	3.62262	0.0174667	Sample_31	AI_export_Plate 1 UNS LN_C5_C05_CD4p_Live.fcs	RFl17_aIL10+aPD1_12_UNS	aIL10+aPD1	RFl17	twelve	aIL10+aPD1_twelve	UNS	C05
947	Sample_31	2	138	0.10832	3.81333	3.20775	3.24735	Sample_31	AI_export_Plate 1 UNS LN_C5_C05_CD4p_Live.fcs	RFl17_aIL10+aPD1_12_UNS	aIL10+aPD1	RFl17	twelve	aIL10+aPD1_twelve	UNS	C05
948	Sample_31	3	221	0.173469	9.68889	9.57793	2.45851	Sample_31	AI_export_Plate 1 UNS LN_C5_C05_CD4p_Live.fcs	RFl17_aIL10+aPD1_12_UNS	aIL10+aPD1	RFl17	twelve	aIL10+aPD1_twelve	UNS	C05
949	Sample_31	4	106	0.0832025	18.702	18.8396	2.67156	Sample_31	AI_export_Plate 1 UNS LN_C5_C05_CD4p_Live.fcs	RFl17_aIL10+aPD1_12_UNS	aIL10+aPD1	RFl17	twelve	aIL10+aPD1_twelve	UNS	C05
950	Sample_31	5	129	0.101256	22.9934	23.1338	1.24884	Sample_31	AI_export_Plate 1 UNS LN_C5_C05_CD4p_Live.fcs	RFl17_aIL10+aPD1_12_UNS	aIL10+aPD1	RFl17	twelve	aIL10+aPD1_twelve	UNS	C05
951	Sample_31	6	135	0.105965	5.40574	5.64732	2.2212	Sample_31	AI_export_Plate 1 UNS LN_C5_C05_CD4p_Live.fcs	RFl17_aIL10+aPD1_12_UNS	aIL10+aPD1	RFl17	twelve	aIL10+aPD1_twelve	UNS	C05
952	Sample_31	7	39	0.0306122	19.1859	20.3545	3.15195	Sample_31	AI_export_Plate 1 UNS LN_C5_C05_CD4p_Live.fcs	RFl17_aIL10+aPD1_12_UNS	aIL10+aPD1	RFl17	twelve	aIL10+aPD1_twelve	UNS	C05
953	Sample_31	8	30	0.0235479	25.5494	25.8077	0.610318	Sample_31	AI_export_Plate 1 UNS LN_C5_C05_CD4p_Live.fcs	RFl17_aIL10+aPD1_12_UNS	aIL10+aPD1	RFl17	twelve	aIL10+aPD1_twelve	UNS	C05
954	Sample_31	9	21	0.0164835	18.8131	23.5609	7.25359	Sample_31	AI_export_Plate 1 UNS LN_C5_C05_CD4p_Live.fcs	RFl17_aIL10+aPD1_12_UNS	aIL10+aPD1	RFl17	twelve	aIL10+aPD1_twelve	UNS	C05
955	Sample_32	1	258	0.202512	3.55469	3.34136	2.74761	Sample_32	AI_export_Plate 1 UNS LN_C6_C06_CD4p_Live.fcs	RYk17_aIL10_12_UNS	aIL10	RYk17	twelve	aIL10_twelve	UNS	C06
956	Sample_32	10	169	0.132653	15.0774	15.4061	1.88849	Sample_32	AI_export_Plate 1 UNS LN_C6_C06_CD4p_Live.fcs	RYk17_aIL10_12_UNS	aIL10	RYk17	twelve	aIL10_twelve	UNS	C06
957	Sample_32	11	6	0.00470958	27.4222	27.557	0.396579	Sample_32	AI_export_Plate 1 UNS LN_C6_C06_CD4p_Live.fcs	RYk17_aIL10_12_UNS	aIL10	RYk17	twelve	aIL10_twelve	UNS	C06
958	Sample_32	12	3	0.00235479	8.83745	9.14765	0.96811	Sample_32	AI_export_Plate 1 UNS LN_C6_C06_CD4p_Live.fcs	RYk17_aIL10_12_UNS	aIL10	RYk17	twelve	aIL10_twelve	UNS	C06
959	Sample_32	13	30	0.0235479	18.5722	17.4779	3.06965	Sample_32	AI_export_Plate 1 UNS LN_C6_C06_CD4p_Live.fcs	RYk17_aIL10_12_UNS	aIL10	RYk17	twelve	aIL10_twelve	UNS	C06
960	Sample_32	14	0	0	NA	NA	NA	Sample_32	AI_export_Plate 1 UNS LN_C6_C06_CD4p_Live.fcs	RYk17_aIL10_12_UNS	aIL10	RYk17	twelve	aIL10_twelve	UNS	C06
961	Sample_32	15	2	0.00156986	NA	NA	NA	Sample_32	AI_export_Plate 1 UNS LN_C6_C06_CD4p_Live.fcs	RYk17_aIL10_12_UNS	aIL10	RYk17	twelve	aIL10_twelve	UNS	C06
962	Sample_32	16	1	0.000784929	27.1868	27.1868	NA	Sample_32	AI_export_Plate 1 UNS LN_C6_C06_CD4p_Live.fcs	RYk17_aIL10_12_UNS	aIL10	RYk17	twelve	aIL10_twelve	UNS	C06
963	Sample_32	17	2	0.00156986	NA	NA	NA	Sample_32	AI_export_Plate 1 UNS LN_C6_C06_CD4p_Live.fcs	RYk17_aIL10_12_UNS	aIL10	RYk17	twelve	aIL10_twelve	UNS	C06
964	Sample_32	18	1	0.000784929	3.63783	3.63783	NA	Sample_32	AI_export_Plate 1 UNS LN_C6_C06_CD4p_Live.fcs	RYk17_aIL10_12_UNS	aIL10	RYk17	twelve	aIL10_twelve	UNS	C06
965	Sample_32	2	132	0.103611	3.60751	3.28991	2.01065	Sample_32	AI_export_Plate 1 UNS LN_C6_C06_CD4p_Live.fcs	RYk17_aIL10_12_UNS	aIL10	RYk17	twelve	aIL10_twelve	UNS	C06
966	Sample_32	3	159	0.124804	9.96665	9.87614	2.51237	Sample_32	AI_export_Plate 1 UNS LN_C6_C06_CD4p_Live.fcs	RYk17_aIL10_12_UNS	aIL10	RYk17	twelve	aIL10_twelve	UNS	C06
967	Sample_32	4	126	0.0989011	18.7942	18.923	3.73373	Sample_32	AI_export_Plate 1 UNS LN_C6_C06_CD4p_Live.fcs	RYk17_aIL10_12_UNS	aIL10	RYk17	twelve	aIL10_twelve	UNS	C06
968	Sample_32	5	118	0.0926217	22.8477	22.7177	0.85325	Sample_32	AI_export_Plate 1 UNS LN_C6_C06_CD4p_Live.fcs	RYk17_aIL10_12_UNS	aIL10	RYk17	twelve	aIL10_twelve	UNS	C06
969	Sample_32	6	156	0.122449	5.44452	5.64732	1.89533	Sample_32	AI_export_Plate 1 UNS LN_C6_C06_CD4p_Live.fcs	RYk17_aIL10_12_UNS	aIL10	RYk17	twelve	aIL10_twelve	UNS	C06
970	Sample_32	7	62	0.0486656	19.4629	20.4098	2.15941	Sample_32	AI_export_Plate 1 UNS LN_C6_C06_CD4p_Live.fcs	RYk17_aIL10_12_UNS	aIL10	RYk17	twelve	aIL10_twelve	UNS	C06
971	Sample_32	8	30	0.0235479	25.444	25.5048	0.519497	Sample_32	AI_export_Plate 1 UNS LN_C6_C06_CD4p_Live.fcs	RYk17_aIL10_12_UNS	aIL10	RYk17	twelve	aIL10_twelve	UNS	C06
972	Sample_32	9	19	0.0149137	20.3099	23.5609	5.05738	Sample_32	AI_export_Plate 1 UNS LN_C6_C06_CD4p_Live.fcs	RYk17_aIL10_12_UNS	aIL10	RYk17	twelve	aIL10_twelve	UNS	C06
973	Sample_33	1	244	0.191523	3.57828	3.54201	2.23369	Sample_33	AI_export_Plate 1 UNS LN_C7_C07_CD4p_Live.fcs	RVz16_Control_12_UNS	Control	RVz16	twelve	Control_twelve	UNS	C07
974	Sample_33	10	190	0.149137	15.1465	15.3142	1.57676	Sample_33	AI_export_Plate 1 UNS LN_C7_C07_CD4p_Live.fcs	RVz16_Control_12_UNS	Control	RVz16	twelve	Control_twelve	UNS	C07
975	Sample_33	11	8	0.00627943	27.1279	27.557	0.687755	Sample_33	AI_export_Plate 1 UNS LN_C7_C07_CD4p_Live.fcs	RVz16_Control_12_UNS	Control	RVz16	twelve	Control_twelve	UNS	C07
976	Sample_33	12	5	0.00392465	9.30416	9.61245	1.04888	Sample_33	AI_export_Plate 1 UNS LN_C7_C07_CD4p_Live.fcs	RVz16_Control_12_UNS	Control	RVz16	twelve	Control_twelve	UNS	C07
977	Sample_33	13	22	0.0172684	17.8728	17.4779	2.59971	Sample_33	AI_export_Plate 1 UNS LN_C7_C07_CD4p_Live.fcs	RVz16_Control_12_UNS	Control	RVz16	twelve	Control_twelve	UNS	C07
978	Sample_33	14	3	0.00235479	26.7194	26.6405	0.587175	Sample_33	AI_export_Plate 1 UNS LN_C7_C07_CD4p_Live.fcs	RVz16_Control_12_UNS	Control	RVz16	twelve	Control_twelve	UNS	C07
979	Sample_33	15	0	0	NA	NA	NA	Sample_33	AI_export_Plate 1 UNS LN_C7_C07_CD4p_Live.fcs	RVz16_Control_12_UNS	Control	RVz16	twelve	Control_twelve	UNS	C07
980	Sample_33	16	2	0.00156986	26.8991	26.8991	0.258458	Sample_33	AI_export_Plate 1 UNS LN_C7_C07_CD4p_Live.fcs	RVz16_Control_12_UNS	Control	RVz16	twelve	Control_twelve	UNS	C07
981	Sample_33	17	1	0.000784929	NA	NA	NA	Sample_33	AI_export_Plate 1 UNS LN_C7_C07_CD4p_Live.fcs	RVz16_Control_12_UNS	Control	RVz16	twelve	Control_twelve	UNS	C07
982	Sample_33	18	0	0	NA	NA	NA	Sample_33	AI_export_Plate 1 UNS LN_C7_C07_CD4p_Live.fcs	RVz16_Control_12_UNS	Control	RVz16	twelve	Control_twelve	UNS	C07
983	Sample_33	2	125	0.0981162	3.82771	3.34022	2.29667	Sample_33	AI_export_Plate 1 UNS LN_C7_C07_CD4p_Live.fcs	RVz16_Control_12_UNS	Control	RVz16	twelve	Control_twelve	UNS	C07
984	Sample_33	3	203	0.159341	9.99501	9.68817	2.46555	Sample_33	AI_export_Plate 1 UNS LN_C7_C07_CD4p_Live.fcs	RVz16_Control_12_UNS	Control	RVz16	twelve	Control_twelve	UNS	C07
985	Sample_33	4	143	0.112245	18.5768	18.6517	3.2694	Sample_33	AI_export_Plate 1 UNS LN_C7_C07_CD4p_Live.fcs	RVz16_Control_12_UNS	Control	RVz16	twelve	Control_twelve	UNS	C07
986	Sample_33	5	98	0.0769231	23.0209	23.173	1.43506	Sample_33	AI_export_Plate 1 UNS LN_C7_C07_CD4p_Live.fcs	RVz16_Control_12_UNS	Control	RVz16	twelve	Control_twelve	UNS	C07
987	Sample_33	6	146	0.1146	5.58527	5.69665	1.19243	Sample_33	AI_export_Plate 1 UNS LN_C7_C07_CD4p_Live.fcs	RVz16_Control_12_UNS	Control	RVz16	twelve	Control_twelve	UNS	C07
988	Sample_33	7	34	0.0266876	19.1218	20.2514	2.84907	Sample_33	AI_export_Plate 1 UNS LN_C7_C07_CD4p_Live.fcs	RVz16_Control_12_UNS	Control	RVz16	twelve	Control_twelve	UNS	C07
989	Sample_33	8	19	0.0149137	25.5761	25.8941	0.637704	Sample_33	AI_export_Plate 1 UNS LN_C7_C07_CD4p_Live.fcs	RVz16_Control_12_UNS	Control	RVz16	twelve	Control_twelve	UNS	C07
990	Sample_33	9	31	0.0243328	20.0942	23.5609	6.76696	Sample_33	AI_export_Plate 1 UNS LN_C7_C07_CD4p_Live.fcs	RVz16_Control_12_UNS	Control	RVz16	twelve	Control_twelve	UNS	C07
991	Sample_34	1	180	0.141287	3.46345	3.36384	2.43183	Sample_34	AI_export_Plate 1 UNS LN_C8_C08_CD4p_Live.fcs	RYm17_aIL10+aPD1_12_UNS	aIL10+aPD1	RYm17	twelve	aIL10+aPD1_twelve	UNS	C08
992	Sample_34	10	256	0.200942	15.2163	15.3086	1.6591	Sample_34	AI_export_Plate 1 UNS LN_C8_C08_CD4p_Live.fcs	RYm17_aIL10+aPD1_12_UNS	aIL10+aPD1	RYm17	twelve	aIL10+aPD1_twelve	UNS	C08
993	Sample_34	11	16	0.0125589	26.5851	27.557	3.73821	Sample_34	AI_export_Plate 1 UNS LN_C8_C08_CD4p_Live.fcs	RYm17_aIL10+aPD1_12_UNS	aIL10+aPD1	RYm17	twelve	aIL10+aPD1_twelve	UNS	C08
994	Sample_34	12	0	0	NA	NA	NA	Sample_34	AI_export_Plate 1 UNS LN_C8_C08_CD4p_Live.fcs	RYm17_aIL10+aPD1_12_UNS	aIL10+aPD1	RYm17	twelve	aIL10+aPD1_twelve	UNS	C08
995	Sample_34	13	23	0.0180534	18.3679	17.4779	2.53611	Sample_34	AI_export_Plate 1 UNS LN_C8_C08_CD4p_Live.fcs	RYm17_aIL10+aPD1_12_UNS	aIL10+aPD1	RYm17	twelve	aIL10+aPD1_twelve	UNS	C08
996	Sample_34	14	9	0.00706436	27.342	27.342	1.90492e-08	Sample_34	AI_export_Plate 1 UNS LN_C8_C08_CD4p_Live.fcs	RYm17_aIL10+aPD1_12_UNS	aIL10+aPD1	RYm17	twelve	aIL10+aPD1_twelve	UNS	C08
997	Sample_34	15	0	0	NA	NA	NA	Sample_34	AI_export_Plate 1 UNS LN_C8_C08_CD4p_Live.fcs	RYm17_aIL10+aPD1_12_UNS	aIL10+aPD1	RYm17	twelve	aIL10+aPD1_twelve	UNS	C08
998	Sample_34	16	0	0	NA	NA	NA	Sample_34	AI_export_Plate 1 UNS LN_C8_C08_CD4p_Live.fcs	RYm17_aIL10+aPD1_12_UNS	aIL10+aPD1	RYm17	twelve	aIL10+aPD1_twelve	UNS	C08
999	Sample_34	17	0	0	NA	NA	NA	Sample_34	AI_export_Plate 1 UNS LN_C8_C08_CD4p_Live.fcs	RYm17_aIL10+aPD1_12_UNS	aIL10+aPD1	RYm17	twelve	aIL10+aPD1_twelve	UNS	C08
1000	Sample_34	18	0	0	NA	NA	NA	Sample_34	AI_export_Plate 1 UNS LN_C8_C08_CD4p_Live.fcs	RYm17_aIL10+aPD1_12_UNS	aIL10+aPD1	RYm17	twelve	aIL10+aPD1_twelve	UNS	C08
1001	Sample_34	2	94	0.0737834	4.20546	3.48096	3.16149	Sample_34	AI_export_Plate 1 UNS LN_C8_C08_CD4p_Live.fcs	RYm17_aIL10+aPD1_12_UNS	aIL10+aPD1	RYm17	twelve	aIL10+aPD1_twelve	UNS	C08
1002	Sample_34	3	152	0.119309	9.7932	9.96189	2.2701	Sample_34	AI_export_Plate 1 UNS LN_C8_C08_CD4p_Live.fcs	RYm17_aIL10+aPD1_12_UNS	aIL10+aPD1	RYm17	twelve	aIL10+aPD1_twelve	UNS	C08
1003	Sample_34	4	137	0.107535	18.2908	18.7743	3.19365	Sample_34	AI_export_Plate 1 UNS LN_C8_C08_CD4p_Live.fcs	RYm17_aIL10+aPD1_12_UNS	aIL10+aPD1	RYm17	twelve	aIL10+aPD1_twelve	UNS	C08
1004	Sample_34	5	124	0.0973312	22.4564	22.7177	2.13797	Sample_34	AI_export_Plate 1 UNS LN_C8_C08_CD4p_Live.fcs	RYm17_aIL10+aPD1_12_UNS	aIL10+aPD1	RYm17	twelve	aIL10+aPD1_twelve	UNS	C08
1005	Sample_34	6	106	0.0832025	6.3025	6.13118	2.69105	Sample_34	AI_export_Plate 1 UNS LN_C8_C08_CD4p_Live.fcs	RYm17_aIL10+aPD1_12_UNS	aIL10+aPD1	RYm17	twelve	aIL10+aPD1_twelve	UNS	C08
1006	Sample_34	7	140	0.10989	19.0584	18.5054	1.93006	Sample_34	AI_export_Plate 1 UNS LN_C8_C08_CD4p_Live.fcs	RYm17_aIL10+aPD1_12_UNS	aIL10+aPD1	RYm17	twelve	aIL10+aPD1_twelve	UNS	C08
1007	Sample_34	8	19	0.0149137	25.5953	25.7494	0.559574	Sample_34	AI_export_Plate 1 UNS LN_C8_C08_CD4p_Live.fcs	RYm17_aIL10+aPD1_12_UNS	aIL10+aPD1	RYm17	twelve	aIL10+aPD1_twelve	UNS	C08
1008	Sample_34	9	18	0.0141287	19.216	23.5609	7.0171	Sample_34	AI_export_Plate 1 UNS LN_C8_C08_CD4p_Live.fcs	RYm17_aIL10+aPD1_12_UNS	aIL10+aPD1	RYm17	twelve	aIL10+aPD1_twelve	UNS	C08
1009	Sample_35	1	205	0.160911	3.5209	3.12702	2.94031	Sample_35	AI_export_Plate 1 UNS LN_C9_C09_CD4p_Live.fcs	RHm17_aIL10_12_UNS	aIL10	RHm17	twelve	aIL10_twelve	UNS	C09
1010	Sample_35	10	144	0.11303	15.1007	15.6478	1.89808	Sample_35	AI_export_Plate 1 UNS LN_C9_C09_CD4p_Live.fcs	RHm17_aIL10_12_UNS	aIL10	RHm17	twelve	aIL10_twelve	UNS	C09
1011	Sample_35	11	12	0.00941915	27.4813	27.557	0.145597	Sample_35	AI_export_Plate 1 UNS LN_C9_C09_CD4p_Live.fcs	RHm17_aIL10_12_UNS	aIL10	RHm17	twelve	aIL10_twelve	UNS	C09
1012	Sample_35	12	4	0.00313972	9.58122	9.61174	0.0615132	Sample_35	AI_export_Plate 1 UNS LN_C9_C09_CD4p_Live.fcs	RHm17_aIL10_12_UNS	aIL10	RHm17	twelve	aIL10_twelve	UNS	C09
1013	Sample_35	13	41	0.0321821	17.9362	17.4779	2.04318	Sample_35	AI_export_Plate 1 UNS LN_C9_C09_CD4p_Live.fcs	RHm17_aIL10_12_UNS	aIL10	RHm17	twelve	aIL10_twelve	UNS	C09
1014	Sample_35	14	2	0.00156986	27.342	27.342	4.91847e-09	Sample_35	AI_export_Plate 1 UNS LN_C9_C09_CD4p_Live.fcs	RHm17_aIL10_12_UNS	aIL10	RHm17	twelve	aIL10_twelve	UNS	C09
1015	Sample_35	15	2	0.00156986	NA	NA	NA	Sample_35	AI_export_Plate 1 UNS LN_C9_C09_CD4p_Live.fcs	RHm17_aIL10_12_UNS	aIL10	RHm17	twelve	aIL10_twelve	UNS	C09
1016	Sample_35	16	0	0	NA	NA	NA	Sample_35	AI_export_Plate 1 UNS LN_C9_C09_CD4p_Live.fcs	RHm17_aIL10_12_UNS	aIL10	RHm17	twelve	aIL10_twelve	UNS	C09
1017	Sample_35	17	0	0	NA	NA	NA	Sample_35	AI_export_Plate 1 UNS LN_C9_C09_CD4p_Live.fcs	RHm17_aIL10_12_UNS	aIL10	RHm17	twelve	aIL10_twelve	UNS	C09
1018	Sample_35	18	0	0	NA	NA	NA	Sample_35	AI_export_Plate 1 UNS LN_C9_C09_CD4p_Live.fcs	RHm17_aIL10_12_UNS	aIL10	RHm17	twelve	aIL10_twelve	UNS	C09
1019	Sample_35	2	193	0.151491	3.20891	2.98172	2.06209	Sample_35	AI_export_Plate 1 UNS LN_C9_C09_CD4p_Live.fcs	RHm17_aIL10_12_UNS	aIL10	RHm17	twelve	aIL10_twelve	UNS	C09
1020	Sample_35	3	173	0.135793	9.53165	9.57775	2.0559	Sample_35	AI_export_Plate 1 UNS LN_C9_C09_CD4p_Live.fcs	RHm17_aIL10_12_UNS	aIL10	RHm17	twelve	aIL10_twelve	UNS	C09
1021	Sample_35	4	162	0.127159	18.6557	18.9649	3.06422	Sample_35	AI_export_Plate 1 UNS LN_C9_C09_CD4p_Live.fcs	RHm17_aIL10_12_UNS	aIL10	RHm17	twelve	aIL10_twelve	UNS	C09
1022	Sample_35	5	97	0.0761381	22.7828	22.8466	1.60511	Sample_35	AI_export_Plate 1 UNS LN_C9_C09_CD4p_Live.fcs	RHm17_aIL10_12_UNS	aIL10	RHm17	twelve	aIL10_twelve	UNS	C09
1023	Sample_35	6	127	0.099686	5.53966	6.09678	1.67537	Sample_35	AI_export_Plate 1 UNS LN_C9_C09_CD4p_Live.fcs	RHm17_aIL10_12_UNS	aIL10	RHm17	twelve	aIL10_twelve	UNS	C09
1024	Sample_35	7	60	0.0470958	18.7366	18.1174	2.7231	Sample_35	AI_export_Plate 1 UNS LN_C9_C09_CD4p_Live.fcs	RHm17_aIL10_12_UNS	aIL10	RHm17	twelve	aIL10_twelve	UNS	C09
1025	Sample_35	8	29	0.022763	25.5088	25.7628	0.563154	Sample_35	AI_export_Plate 1 UNS LN_C9_C09_CD4p_Live.fcs	RHm17_aIL10_12_UNS	aIL10	RHm17	twelve	aIL10_twelve	UNS	C09
1026	Sample_35	9	23	0.0180534	19.9856	23.5609	6.91626	Sample_35	AI_export_Plate 1 UNS LN_C9_C09_CD4p_Live.fcs	RHm17_aIL10_12_UNS	aIL10	RHm17	twelve	aIL10_twelve	UNS	C09
1027	Sample_36	1	265	0.208006	4.25849	4.20676	2.70978	Sample_36	AI_export_Plate 1 UNS LN_D1_D01_CD4p_export_Plate 1 UNS LN_D1_D01_CD4p_Live.fcs	RRh17_aIL10+aPD1_12_UNS	aIL10+aPD1	RRh17	twelve	aIL10+aPD1_twelve	UNS	D01
1028	Sample_36	10	82	0.0643642	14.2071	14.6009	1.81907	Sample_36	AI_export_Plate 1 UNS LN_D1_D01_CD4p_export_Plate 1 UNS LN_D1_D01_CD4p_Live.fcs	RRh17_aIL10+aPD1_12_UNS	aIL10+aPD1	RRh17	twelve	aIL10+aPD1_twelve	UNS	D01
1029	Sample_36	11	11	0.00863422	25.1914	27.4169	5.56932	Sample_36	AI_export_Plate 1 UNS LN_D1_D01_CD4p_export_Plate 1 UNS LN_D1_D01_CD4p_Live.fcs	RRh17_aIL10+aPD1_12_UNS	aIL10+aPD1	RRh17	twelve	aIL10+aPD1_twelve	UNS	D01
1030	Sample_36	12	3	0.00235479	14.8421	13.2271	6.19574	Sample_36	AI_export_Plate 1 UNS LN_D1_D01_CD4p_export_Plate 1 UNS LN_D1_D01_CD4p_Live.fcs	RRh17_aIL10+aPD1_12_UNS	aIL10+aPD1	RRh17	twelve	aIL10+aPD1_twelve	UNS	D01
1031	Sample_36	13	27	0.0211931	18.542	20.5213	3.59439	Sample_36	AI_export_Plate 1 UNS LN_D1_D01_CD4p_export_Plate 1 UNS LN_D1_D01_CD4p_Live.fcs	RRh17_aIL10+aPD1_12_UNS	aIL10+aPD1	RRh17	twelve	aIL10+aPD1_twelve	UNS	D01
1032	Sample_36	14	0	0	NA	NA	NA	Sample_36	AI_export_Plate 1 UNS LN_D1_D01_CD4p_export_Plate 1 UNS LN_D1_D01_CD4p_Live.fcs	RRh17_aIL10+aPD1_12_UNS	aIL10+aPD1	RRh17	twelve	aIL10+aPD1_twelve	UNS	D01
1033	Sample_36	15	4	0.00313972	NA	NA	NA	Sample_36	AI_export_Plate 1 UNS LN_D1_D01_CD4p_export_Plate 1 UNS LN_D1_D01_CD4p_Live.fcs	RRh17_aIL10+aPD1_12_UNS	aIL10+aPD1	RRh17	twelve	aIL10+aPD1_twelve	UNS	D01
1034	Sample_36	16	1	0.000784929	17.3762	17.3762	NA	Sample_36	AI_export_Plate 1 UNS LN_D1_D01_CD4p_export_Plate 1 UNS LN_D1_D01_CD4p_Live.fcs	RRh17_aIL10+aPD1_12_UNS	aIL10+aPD1	RRh17	twelve	aIL10+aPD1_twelve	UNS	D01
1035	Sample_36	17	5	0.00392465	NA	NA	NA	Sample_36	AI_export_Plate 1 UNS LN_D1_D01_CD4p_export_Plate 1 UNS LN_D1_D01_CD4p_Live.fcs	RRh17_aIL10+aPD1_12_UNS	aIL10+aPD1	RRh17	twelve	aIL10+aPD1_twelve	UNS	D01
1036	Sample_36	18	3	0.00235479	7.26264	3.6238	6.35523	Sample_36	AI_export_Plate 1 UNS LN_D1_D01_CD4p_export_Plate 1 UNS LN_D1_D01_CD4p_Live.fcs	RRh17_aIL10+aPD1_12_UNS	aIL10+aPD1	RRh17	twelve	aIL10+aPD1_twelve	UNS	D01
1037	Sample_36	2	183	0.143642	3.90217	3.61731	2.24028	Sample_36	AI_export_Plate 1 UNS LN_D1_D01_CD4p_export_Plate 1 UNS LN_D1_D01_CD4p_Live.fcs	RRh17_aIL10+aPD1_12_UNS	aIL10+aPD1	RRh17	twelve	aIL10+aPD1_twelve	UNS	D01
1038	Sample_36	3	160	0.125589	10.0752	10.1511	1.9122	Sample_36	AI_export_Plate 1 UNS LN_D1_D01_CD4p_export_Plate 1 UNS LN_D1_D01_CD4p_Live.fcs	RRh17_aIL10+aPD1_12_UNS	aIL10+aPD1	RRh17	twelve	aIL10+aPD1_twelve	UNS	D01
1039	Sample_36	4	63	0.0494505	16.7213	18.0503	4.96093	Sample_36	AI_export_Plate 1 UNS LN_D1_D01_CD4p_export_Plate 1 UNS LN_D1_D01_CD4p_Live.fcs	RRh17_aIL10+aPD1_12_UNS	aIL10+aPD1	RRh17	twelve	aIL10+aPD1_twelve	UNS	D01
1040	Sample_36	5	74	0.0580848	22.8071	22.7253	1.36868	Sample_36	AI_export_Plate 1 UNS LN_D1_D01_CD4p_export_Plate 1 UNS LN_D1_D01_CD4p_Live.fcs	RRh17_aIL10+aPD1_12_UNS	aIL10+aPD1	RRh17	twelve	aIL10+aPD1_twelve	UNS	D01
1041	Sample_36	6	346	0.271586	5.57243	5.65159	1.68739	Sample_36	AI_export_Plate 1 UNS LN_D1_D01_CD4p_export_Plate 1 UNS LN_D1_D01_CD4p_Live.fcs	RRh17_aIL10+aPD1_12_UNS	aIL10+aPD1	RRh17	twelve	aIL10+aPD1_twelve	UNS	D01
1042	Sample_36	7	22	0.0172684	19.1054	20.2895	2.98596	Sample_36	AI_export_Plate 1 UNS LN_D1_D01_CD4p_export_Plate 1 UNS LN_D1_D01_CD4p_Live.fcs	RRh17_aIL10+aPD1_12_UNS	aIL10+aPD1	RRh17	twelve	aIL10+aPD1_twelve	UNS	D01
1043	Sample_36	8	17	0.0133438	25.7193	25.8552	0.511016	Sample_36	AI_export_Plate 1 UNS LN_D1_D01_CD4p_export_Plate 1 UNS LN_D1_D01_CD4p_Live.fcs	RRh17_aIL10+aPD1_12_UNS	aIL10+aPD1	RRh17	twelve	aIL10+aPD1_twelve	UNS	D01
1044	Sample_36	9	8	0.00627943	16.5538	17.9718	7.78294	Sample_36	AI_export_Plate 1 UNS LN_D1_D01_CD4p_export_Plate 1 UNS LN_D1_D01_CD4p_Live.fcs	RRh17_aIL10+aPD1_12_UNS	aIL10+aPD1	RRh17	twelve	aIL10+aPD1_twelve	UNS	D01
1045	Sample_37	1	92	0.0722135	4.01244	3.92447	2.22281	Sample_37	AI_export_Plate 1 UNS LN_D10_D10_CD4p_Live.fcs	RYm17_aIL10+aPD1_21_UNS	aIL10+aPD1	RYm17	twenty_one	aIL10+aPD1_twenty_one	UNS	D10
1046	Sample_37	10	289	0.226845	15.3051	15.6594	1.59149	Sample_37	AI_export_Plate 1 UNS LN_D10_D10_CD4p_Live.fcs	RYm17_aIL10+aPD1_21_UNS	aIL10+aPD1	RYm17	twenty_one	aIL10+aPD1_twenty_one	UNS	D10
1047	Sample_37	11	13	0.0102041	27.3835	27.557	0.364063	Sample_37	AI_export_Plate 1 UNS LN_D10_D10_CD4p_Live.fcs	RYm17_aIL10+aPD1_21_UNS	aIL10+aPD1	RYm17	twenty_one	aIL10+aPD1_twenty_one	UNS	D10
1048	Sample_37	12	1	0.000784929	9.2107	9.2107	NA	Sample_37	AI_export_Plate 1 UNS LN_D10_D10_CD4p_Live.fcs	RYm17_aIL10+aPD1_21_UNS	aIL10+aPD1	RYm17	twenty_one	aIL10+aPD1_twenty_one	UNS	D10
1049	Sample_37	13	28	0.021978	18.0814	17.4779	1.60304	Sample_37	AI_export_Plate 1 UNS LN_D10_D10_CD4p_Live.fcs	RYm17_aIL10+aPD1_21_UNS	aIL10+aPD1	RYm17	twenty_one	aIL10+aPD1_twenty_one	UNS	D10
1050	Sample_37	14	4	0.00313972	27.1312	27.342	0.36516	Sample_37	AI_export_Plate 1 UNS LN_D10_D10_CD4p_Live.fcs	RYm17_aIL10+aPD1_21_UNS	aIL10+aPD1	RYm17	twenty_one	aIL10+aPD1_twenty_one	UNS	D10
1051	Sample_37	15	1	0.000784929	NA	NA	NA	Sample_37	AI_export_Plate 1 UNS LN_D10_D10_CD4p_Live.fcs	RYm17_aIL10+aPD1_21_UNS	aIL10+aPD1	RYm17	twenty_one	aIL10+aPD1_twenty_one	UNS	D10
1052	Sample_37	16	0	0	NA	NA	NA	Sample_37	AI_export_Plate 1 UNS LN_D10_D10_CD4p_Live.fcs	RYm17_aIL10+aPD1_21_UNS	aIL10+aPD1	RYm17	twenty_one	aIL10+aPD1_twenty_one	UNS	D10
1053	Sample_37	17	3	0.00235479	NA	NA	NA	Sample_37	AI_export_Plate 1 UNS LN_D10_D10_CD4p_Live.fcs	RYm17_aIL10+aPD1_21_UNS	aIL10+aPD1	RYm17	twenty_one	aIL10+aPD1_twenty_one	UNS	D10
1054	Sample_37	18	0	0	NA	NA	NA	Sample_37	AI_export_Plate 1 UNS LN_D10_D10_CD4p_Live.fcs	RYm17_aIL10+aPD1_21_UNS	aIL10+aPD1	RYm17	twenty_one	aIL10+aPD1_twenty_one	UNS	D10
1055	Sample_37	2	149	0.116954	4.21872	3.63783	2.2098	Sample_37	AI_export_Plate 1 UNS LN_D10_D10_CD4p_Live.fcs	RYm17_aIL10+aPD1_21_UNS	aIL10+aPD1	RYm17	twenty_one	aIL10+aPD1_twenty_one	UNS	D10
1056	Sample_37	3	169	0.132653	10.0341	10.1167	2.50188	Sample_37	AI_export_Plate 1 UNS LN_D10_D10_CD4p_Live.fcs	RYm17_aIL10+aPD1_21_UNS	aIL10+aPD1	RYm17	twenty_one	aIL10+aPD1_twenty_one	UNS	D10
1057	Sample_37	4	128	0.100471	17.841	18.0503	3.41978	Sample_37	AI_export_Plate 1 UNS LN_D10_D10_CD4p_Live.fcs	RYm17_aIL10+aPD1_21_UNS	aIL10+aPD1	RYm17	twenty_one	aIL10+aPD1_twenty_one	UNS	D10
1058	Sample_37	5	135	0.105965	22.6688	22.7177	1.42553	Sample_37	AI_export_Plate 1 UNS LN_D10_D10_CD4p_Live.fcs	RYm17_aIL10+aPD1_21_UNS	aIL10+aPD1	RYm17	twenty_one	aIL10+aPD1_twenty_one	UNS	D10
1059	Sample_37	6	143	0.112245	5.42033	5.2742	2.46244	Sample_37	AI_export_Plate 1 UNS LN_D10_D10_CD4p_Live.fcs	RYm17_aIL10+aPD1_21_UNS	aIL10+aPD1	RYm17	twenty_one	aIL10+aPD1_twenty_one	UNS	D10
1060	Sample_37	7	71	0.05573	18.8629	20.109	2.7882	Sample_37	AI_export_Plate 1 UNS LN_D10_D10_CD4p_Live.fcs	RYm17_aIL10+aPD1_21_UNS	aIL10+aPD1	RYm17	twenty_one	aIL10+aPD1_twenty_one	UNS	D10
1061	Sample_37	8	21	0.0164835	25.4272	25.654	0.912237	Sample_37	AI_export_Plate 1 UNS LN_D10_D10_CD4p_Live.fcs	RYm17_aIL10+aPD1_21_UNS	aIL10+aPD1	RYm17	twenty_one	aIL10+aPD1_twenty_one	UNS	D10
1062	Sample_37	9	27	0.0211931	19.7861	23.5609	6.58827	Sample_37	AI_export_Plate 1 UNS LN_D10_D10_CD4p_Live.fcs	RYm17_aIL10+aPD1_21_UNS	aIL10+aPD1	RYm17	twenty_one	aIL10+aPD1_twenty_one	UNS	D10
1063	Sample_38	1	173	0.135793	3.50115	2.77211	3.86234	Sample_38	AI_export_Plate 1 UNS LN_D11_D11_CD4p_Live.fcs	RHm17_aIL10_21_UNS	aIL10	RHm17	twenty_one	aIL10_twenty_one	UNS	D11
1064	Sample_38	10	113	0.088697	14.9075	15.183	2.04648	Sample_38	AI_export_Plate 1 UNS LN_D11_D11_CD4p_Live.fcs	RHm17_aIL10_21_UNS	aIL10	RHm17	twenty_one	aIL10_twenty_one	UNS	D11
1065	Sample_38	11	32	0.0251177	27.4255	27.557	0.376392	Sample_38	AI_export_Plate 1 UNS LN_D11_D11_CD4p_Live.fcs	RHm17_aIL10_21_UNS	aIL10	RHm17	twenty_one	aIL10_twenty_one	UNS	D11
1066	Sample_38	12	13	0.0102041	10.6384	9.61244	4.64013	Sample_38	AI_export_Plate 1 UNS LN_D11_D11_CD4p_Live.fcs	RHm17_aIL10_21_UNS	aIL10	RHm17	twenty_one	aIL10_twenty_one	UNS	D11
1067	Sample_38	13	58	0.0455259	18.2323	17.4779	2.48084	Sample_38	AI_export_Plate 1 UNS LN_D11_D11_CD4p_Live.fcs	RHm17_aIL10_21_UNS	aIL10	RHm17	twenty_one	aIL10_twenty_one	UNS	D11
1068	Sample_38	14	0	0	NA	NA	NA	Sample_38	AI_export_Plate 1 UNS LN_D11_D11_CD4p_Live.fcs	RHm17_aIL10_21_UNS	aIL10	RHm17	twenty_one	aIL10_twenty_one	UNS	D11
1069	Sample_38	15	4	0.00313972	NA	NA	NA	Sample_38	AI_export_Plate 1 UNS LN_D11_D11_CD4p_Live.fcs	RHm17_aIL10_21_UNS	aIL10	RHm17	twenty_one	aIL10_twenty_one	UNS	D11
1070	Sample_38	16	2	0.00156986	27.294	27.294	0.071069	Sample_38	AI_export_Plate 1 UNS LN_D11_D11_CD4p_Live.fcs	RHm17_aIL10_21_UNS	aIL10	RHm17	twenty_one	aIL10_twenty_one	UNS	D11
1071	Sample_38	17	1	0.000784929	NA	NA	NA	Sample_38	AI_export_Plate 1 UNS LN_D11_D11_CD4p_Live.fcs	RHm17_aIL10_21_UNS	aIL10	RHm17	twenty_one	aIL10_twenty_one	UNS	D11
1072	Sample_38	18	0	0	NA	NA	NA	Sample_38	AI_export_Plate 1 UNS LN_D11_D11_CD4p_Live.fcs	RHm17_aIL10_21_UNS	aIL10	RHm17	twenty_one	aIL10_twenty_one	UNS	D11
1073	Sample_38	2	192	0.150706	2.90065	2.72668	1.78723	Sample_38	AI_export_Plate 1 UNS LN_D11_D11_CD4p_Live.fcs	RHm17_aIL10_21_UNS	aIL10	RHm17	twenty_one	aIL10_twenty_one	UNS	D11
1074	Sample_38	3	178	0.139717	9.34406	9.53099	1.99582	Sample_38	AI_export_Plate 1 UNS LN_D11_D11_CD4p_Live.fcs	RHm17_aIL10_21_UNS	aIL10	RHm17	twenty_one	aIL10_twenty_one	UNS	D11
1075	Sample_38	4	139	0.109105	18.2517	18.9105	3.54719	Sample_38	AI_export_Plate 1 UNS LN_D11_D11_CD4p_Live.fcs	RHm17_aIL10_21_UNS	aIL10	RHm17	twenty_one	aIL10_twenty_one	UNS	D11
1076	Sample_38	5	127	0.099686	23.1252	23.3019	0.901246	Sample_38	AI_export_Plate 1 UNS LN_D11_D11_CD4p_Live.fcs	RHm17_aIL10_21_UNS	aIL10	RHm17	twenty_one	aIL10_twenty_one	UNS	D11
1077	Sample_38	6	73	0.0572998	5.42594	6.08297	1.86091	Sample_38	AI_export_Plate 1 UNS LN_D11_D11_CD4p_Live.fcs	RHm17_aIL10_21_UNS	aIL10	RHm17	twenty_one	aIL10_twenty_one	UNS	D11
1078	Sample_38	7	65	0.0510204	19.2032	20.1165	2.12173	Sample_38	AI_export_Plate 1 UNS LN_D11_D11_CD4p_Live.fcs	RHm17_aIL10_21_UNS	aIL10	RHm17	twenty_one	aIL10_twenty_one	UNS	D11
1079	Sample_38	8	47	0.0368917	25.7047	25.8594	0.762213	Sample_38	AI_export_Plate 1 UNS LN_D11_D11_CD4p_Live.fcs	RHm17_aIL10_21_UNS	aIL10	RHm17	twenty_one	aIL10_twenty_one	UNS	D11
1080	Sample_38	9	57	0.044741	18.921	23.5609	7.4336	Sample_38	AI_export_Plate 1 UNS LN_D11_D11_CD4p_Live.fcs	RHm17_aIL10_21_UNS	aIL10	RHm17	twenty_one	aIL10_twenty_one	UNS	D11
1081	Sample_39	1	108	0.0847724	3.3639	3.13255	2.32561	Sample_39	AI_export_Plate 1 UNS LN_D12_D12_CD4p_Live.fcs	RNy16_aIL10+aPD1_21_UNS	aIL10+aPD1	RNy16	twenty_one	aIL10+aPD1_twenty_one	UNS	D12
1082	Sample_39	10	207	0.16248	15.0743	15.4656	1.63617	Sample_39	AI_export_Plate 1 UNS LN_D12_D12_CD4p_Live.fcs	RNy16_aIL10+aPD1_21_UNS	aIL10+aPD1	RNy16	twenty_one	aIL10+aPD1_twenty_one	UNS	D12
1083	Sample_39	11	13	0.0102041	27.5325	27.557	0.0921028	Sample_39	AI_export_Plate 1 UNS LN_D12_D12_CD4p_Live.fcs	RNy16_aIL10+aPD1_21_UNS	aIL10+aPD1	RNy16	twenty_one	aIL10+aPD1_twenty_one	UNS	D12
1084	Sample_39	12	10	0.00784929	8.6686	9.39895	1.06422	Sample_39	AI_export_Plate 1 UNS LN_D12_D12_CD4p_Live.fcs	RNy16_aIL10+aPD1_21_UNS	aIL10+aPD1	RNy16	twenty_one	aIL10+aPD1_twenty_one	UNS	D12
1085	Sample_39	13	21	0.0164835	18.486	17.4779	2.79447	Sample_39	AI_export_Plate 1 UNS LN_D12_D12_CD4p_Live.fcs	RNy16_aIL10+aPD1_21_UNS	aIL10+aPD1	RNy16	twenty_one	aIL10+aPD1_twenty_one	UNS	D12
1086	Sample_39	14	0	0	NA	NA	NA	Sample_39	AI_export_Plate 1 UNS LN_D12_D12_CD4p_Live.fcs	RNy16_aIL10+aPD1_21_UNS	aIL10+aPD1	RNy16	twenty_one	aIL10+aPD1_twenty_one	UNS	D12
1087	Sample_39	15	2	0.00156986	15.4248	15.4248	NA	Sample_39	AI_export_Plate 1 UNS LN_D12_D12_CD4p_Live.fcs	RNy16_aIL10+aPD1_21_UNS	aIL10+aPD1	RNy16	twenty_one	aIL10+aPD1_twenty_one	UNS	D12
1088	Sample_39	16	1	0.000784929	26.8106	26.8106	NA	Sample_39	AI_export_Plate 1 UNS LN_D12_D12_CD4p_Live.fcs	RNy16_aIL10+aPD1_21_UNS	aIL10+aPD1	RNy16	twenty_one	aIL10+aPD1_twenty_one	UNS	D12
1089	Sample_39	17	1	0.000784929	NA	NA	NA	Sample_39	AI_export_Plate 1 UNS LN_D12_D12_CD4p_Live.fcs	RNy16_aIL10+aPD1_21_UNS	aIL10+aPD1	RNy16	twenty_one	aIL10+aPD1_twenty_one	UNS	D12
1090	Sample_39	18	1	0.000784929	NA	NA	NA	Sample_39	AI_export_Plate 1 UNS LN_D12_D12_CD4p_Live.fcs	RNy16_aIL10+aPD1_21_UNS	aIL10+aPD1	RNy16	twenty_one	aIL10+aPD1_twenty_one	UNS	D12
1091	Sample_39	2	297	0.233124	3.52537	3.21969	2.11904	Sample_39	AI_export_Plate 1 UNS LN_D12_D12_CD4p_Live.fcs	RNy16_aIL10+aPD1_21_UNS	aIL10+aPD1	RNy16	twenty_one	aIL10+aPD1_twenty_one	UNS	D12
1092	Sample_39	3	292	0.229199	9.66861	9.9782	1.95442	Sample_39	AI_export_Plate 1 UNS LN_D12_D12_CD4p_Live.fcs	RNy16_aIL10+aPD1_21_UNS	aIL10+aPD1	RNy16	twenty_one	aIL10+aPD1_twenty_one	UNS	D12
1093	Sample_39	4	125	0.0981162	18.4966	18.8159	3.10465	Sample_39	AI_export_Plate 1 UNS LN_D12_D12_CD4p_Live.fcs	RNy16_aIL10+aPD1_21_UNS	aIL10+aPD1	RNy16	twenty_one	aIL10+aPD1_twenty_one	UNS	D12
1094	Sample_39	5	90	0.0706436	23.1601	23.1441	0.675984	Sample_39	AI_export_Plate 1 UNS LN_D12_D12_CD4p_Live.fcs	RNy16_aIL10+aPD1_21_UNS	aIL10+aPD1	RNy16	twenty_one	aIL10+aPD1_twenty_one	UNS	D12
1095	Sample_39	6	53	0.0416013	5.93192	5.86678	2.48639	Sample_39	AI_export_Plate 1 UNS LN_D12_D12_CD4p_Live.fcs	RNy16_aIL10+aPD1_21_UNS	aIL10+aPD1	RNy16	twenty_one	aIL10+aPD1_twenty_one	UNS	D12
1096	Sample_39	7	35	0.0274725	17.4436	17.5129	3.1413	Sample_39	AI_export_Plate 1 UNS LN_D12_D12_CD4p_Live.fcs	RNy16_aIL10+aPD1_21_UNS	aIL10+aPD1	RNy16	twenty_one	aIL10+aPD1_twenty_one	UNS	D12
1097	Sample_39	8	10	0.00784929	25.8367	25.9115	0.387436	Sample_39	AI_export_Plate 1 UNS LN_D12_D12_CD4p_Live.fcs	RNy16_aIL10+aPD1_21_UNS	aIL10+aPD1	RNy16	twenty_one	aIL10+aPD1_twenty_one	UNS	D12
1098	Sample_39	9	8	0.00627943	14.5587	13.5732	7.94399	Sample_39	AI_export_Plate 1 UNS LN_D12_D12_CD4p_Live.fcs	RNy16_aIL10+aPD1_21_UNS	aIL10+aPD1	RNy16	twenty_one	aIL10+aPD1_twenty_one	UNS	D12
1099	Sample_4	1	177	0.138932	3.1963	2.8357	2.29177	Sample_4	AI_export_Plate 1 UNS LN_A12_A12_CD4p_Live.fcs	RBe17_Control_-1_UNS	Control	RBe17	minus_one	Control_minus_one	UNS	A12
1100	Sample_4	10	198	0.155416	14.9749	14.9776	1.82284	Sample_4	AI_export_Plate 1 UNS LN_A12_A12_CD4p_Live.fcs	RBe17_Control_-1_UNS	Control	RBe17	minus_one	Control_minus_one	UNS	A12
1101	Sample_4	11	9	0.00706436	27.4238	27.557	0.180478	Sample_4	AI_export_Plate 1 UNS LN_A12_A12_CD4p_Live.fcs	RBe17_Control_-1_UNS	Control	RBe17	minus_one	Control_minus_one	UNS	A12
1102	Sample_4	12	8	0.00627943	9.1375	9.56471	0.770861	Sample_4	AI_export_Plate 1 UNS LN_A12_A12_CD4p_Live.fcs	RBe17_Control_-1_UNS	Control	RBe17	minus_one	Control_minus_one	UNS	A12
1103	Sample_4	13	21	0.0164835	19.039	17.4779	1.75687	Sample_4	AI_export_Plate 1 UNS LN_A12_A12_CD4p_Live.fcs	RBe17_Control_-1_UNS	Control	RBe17	minus_one	Control_minus_one	UNS	A12
1104	Sample_4	14	2	0.00156986	27.342	27.342	4.91847e-09	Sample_4	AI_export_Plate 1 UNS LN_A12_A12_CD4p_Live.fcs	RBe17_Control_-1_UNS	Control	RBe17	minus_one	Control_minus_one	UNS	A12
1105	Sample_4	15	1	0.000784929	NA	NA	NA	Sample_4	AI_export_Plate 1 UNS LN_A12_A12_CD4p_Live.fcs	RBe17_Control_-1_UNS	Control	RBe17	minus_one	Control_minus_one	UNS	A12
1106	Sample_4	16	0	0	NA	NA	NA	Sample_4	AI_export_Plate 1 UNS LN_A12_A12_CD4p_Live.fcs	RBe17_Control_-1_UNS	Control	RBe17	minus_one	Control_minus_one	UNS	A12
1107	Sample_4	17	1	0.000784929	NA	NA	NA	Sample_4	AI_export_Plate 1 UNS LN_A12_A12_CD4p_Live.fcs	RBe17_Control_-1_UNS	Control	RBe17	minus_one	Control_minus_one	UNS	A12
1108	Sample_4	18	0	0	NA	NA	NA	Sample_4	AI_export_Plate 1 UNS LN_A12_A12_CD4p_Live.fcs	RBe17_Control_-1_UNS	Control	RBe17	minus_one	Control_minus_one	UNS	A12
1109	Sample_4	2	153	0.120094	3.34583	3.20786	1.63203	Sample_4	AI_export_Plate 1 UNS LN_A12_A12_CD4p_Live.fcs	RBe17_Control_-1_UNS	Control	RBe17	minus_one	Control_minus_one	UNS	A12
1110	Sample_4	3	253	0.198587	9.93277	10.4209	1.99307	Sample_4	AI_export_Plate 1 UNS LN_A12_A12_CD4p_Live.fcs	RBe17_Control_-1_UNS	Control	RBe17	minus_one	Control_minus_one	UNS	A12
1111	Sample_4	4	201	0.157771	18.8841	19.2889	2.55543	Sample_4	AI_export_Plate 1 UNS LN_A12_A12_CD4p_Live.fcs	RBe17_Control_-1_UNS	Control	RBe17	minus_one	Control_minus_one	UNS	A12
1112	Sample_4	5	132	0.103611	23.0125	23.1715	1.12107	Sample_4	AI_export_Plate 1 UNS LN_A12_A12_CD4p_Live.fcs	RBe17_Control_-1_UNS	Control	RBe17	minus_one	Control_minus_one	UNS	A12
1113	Sample_4	6	51	0.0400314	5.73827	5.64732	2.4189	Sample_4	AI_export_Plate 1 UNS LN_A12_A12_CD4p_Live.fcs	RBe17_Control_-1_UNS	Control	RBe17	minus_one	Control_minus_one	UNS	A12
1114	Sample_4	7	41	0.0321821	19.5457	20.1761	1.82391	Sample_4	AI_export_Plate 1 UNS LN_A12_A12_CD4p_Live.fcs	RBe17_Control_-1_UNS	Control	RBe17	minus_one	Control_minus_one	UNS	A12
1115	Sample_4	8	8	0.00627943	25.9529	25.913	0.151258	Sample_4	AI_export_Plate 1 UNS LN_A12_A12_CD4p_Live.fcs	RBe17_Control_-1_UNS	Control	RBe17	minus_one	Control_minus_one	UNS	A12
1116	Sample_4	9	18	0.0141287	19.8913	23.5609	7.07088	Sample_4	AI_export_Plate 1 UNS LN_A12_A12_CD4p_Live.fcs	RBe17_Control_-1_UNS	Control	RBe17	minus_one	Control_minus_one	UNS	A12
1117	Sample_40	1	214	0.167975	3.91642	3.75189	3.32611	Sample_40	AI_export_Plate 1 UNS LN_D2_D02_CD4p_Live.fcs	RFn17_aIL10_12_UNS	aIL10	RFn17	twelve	aIL10_twelve	UNS	D02
1118	Sample_40	10	154	0.120879	14.6919	14.6009	1.78034	Sample_40	AI_export_Plate 1 UNS LN_D2_D02_CD4p_Live.fcs	RFn17_aIL10_12_UNS	aIL10	RFn17	twelve	aIL10_twelve	UNS	D02
1119	Sample_40	11	9	0.00706436	27.4634	27.557	0.159286	Sample_40	AI_export_Plate 1 UNS LN_D2_D02_CD4p_Live.fcs	RFn17_aIL10_12_UNS	aIL10	RFn17	twelve	aIL10_twelve	UNS	D02
1120	Sample_40	12	12	0.00941915	9.55168	9.61244	0.126824	Sample_40	AI_export_Plate 1 UNS LN_D2_D02_CD4p_Live.fcs	RFn17_aIL10_12_UNS	aIL10	RFn17	twelve	aIL10_twelve	UNS	D02
1121	Sample_40	13	17	0.0133438	18.718	17.4779	1.7756	Sample_40	AI_export_Plate 1 UNS LN_D2_D02_CD4p_Live.fcs	RFn17_aIL10_12_UNS	aIL10	RFn17	twelve	aIL10_twelve	UNS	D02
1122	Sample_40	14	0	0	NA	NA	NA	Sample_40	AI_export_Plate 1 UNS LN_D2_D02_CD4p_Live.fcs	RFn17_aIL10_12_UNS	aIL10	RFn17	twelve	aIL10_twelve	UNS	D02
1123	Sample_40	15	0	0	NA	NA	NA	Sample_40	AI_export_Plate 1 UNS LN_D2_D02_CD4p_Live.fcs	RFn17_aIL10_12_UNS	aIL10	RFn17	twelve	aIL10_twelve	UNS	D02
1124	Sample_40	16	1	0.000784929	27.2418	27.2418	NA	Sample_40	AI_export_Plate 1 UNS LN_D2_D02_CD4p_Live.fcs	RFn17_aIL10_12_UNS	aIL10	RFn17	twelve	aIL10_twelve	UNS	D02
1125	Sample_40	17	1	0.000784929	NA	NA	NA	Sample_40	AI_export_Plate 1 UNS LN_D2_D02_CD4p_Live.fcs	RFn17_aIL10_12_UNS	aIL10	RFn17	twelve	aIL10_twelve	UNS	D02
1126	Sample_40	18	0	0	NA	NA	NA	Sample_40	AI_export_Plate 1 UNS LN_D2_D02_CD4p_Live.fcs	RFn17_aIL10_12_UNS	aIL10	RFn17	twelve	aIL10_twelve	UNS	D02
1127	Sample_40	2	158	0.124019	3.65782	3.25625	2.19617	Sample_40	AI_export_Plate 1 UNS LN_D2_D02_CD4p_Live.fcs	RFn17_aIL10_12_UNS	aIL10	RFn17	twelve	aIL10_twelve	UNS	D02
1128	Sample_40	3	284	0.22292	10.0363	9.91044	2.27021	Sample_40	AI_export_Plate 1 UNS LN_D2_D02_CD4p_Live.fcs	RFn17_aIL10_12_UNS	aIL10	RFn17	twelve	aIL10_twelve	UNS	D02
1129	Sample_40	4	133	0.104396	18.3714	18.8088	3.24703	Sample_40	AI_export_Plate 1 UNS LN_D2_D02_CD4p_Live.fcs	RFn17_aIL10_12_UNS	aIL10	RFn17	twelve	aIL10_twelve	UNS	D02
1130	Sample_40	5	93	0.0729984	22.6206	22.8421	2.48499	Sample_40	AI_export_Plate 1 UNS LN_D2_D02_CD4p_Live.fcs	RFn17_aIL10_12_UNS	aIL10	RFn17	twelve	aIL10_twelve	UNS	D02
1131	Sample_40	6	141	0.110675	5.624	5.64731	1.84947	Sample_40	AI_export_Plate 1 UNS LN_D2_D02_CD4p_Live.fcs	RFn17_aIL10_12_UNS	aIL10	RFn17	twelve	aIL10_twelve	UNS	D02
1132	Sample_40	7	19	0.0149137	18.9426	19.3861	2.49561	Sample_40	AI_export_Plate 1 UNS LN_D2_D02_CD4p_Live.fcs	RFn17_aIL10_12_UNS	aIL10	RFn17	twelve	aIL10_twelve	UNS	D02
1133	Sample_40	8	22	0.0172684	25.4594	25.5048	0.620912	Sample_40	AI_export_Plate 1 UNS LN_D2_D02_CD4p_Live.fcs	RFn17_aIL10_12_UNS	aIL10	RFn17	twelve	aIL10_twelve	UNS	D02
1134	Sample_40	9	16	0.0125589	16.247	23.5609	8.58184	Sample_40	AI_export_Plate 1 UNS LN_D2_D02_CD4p_Live.fcs	RFn17_aIL10_12_UNS	aIL10	RFn17	twelve	aIL10_twelve	UNS	D02
1135	Sample_41	1	179	0.140502	4.15415	3.97561	2.25199	Sample_41	AI_export_Plate 1 UNS LN_D3_D03_CD4p_Live.fcs	RVm17_aIL10_12_UNS	aIL10	RVm17	twelve	aIL10_twelve	UNS	D03
1136	Sample_41	10	134	0.105181	14.9582	14.6426	2.16408	Sample_41	AI_export_Plate 1 UNS LN_D3_D03_CD4p_Live.fcs	RVm17_aIL10_12_UNS	aIL10	RVm17	twelve	aIL10_twelve	UNS	D03
1137	Sample_41	11	28	0.021978	27.2779	27.557	0.412986	Sample_41	AI_export_Plate 1 UNS LN_D3_D03_CD4p_Live.fcs	RVm17_aIL10_12_UNS	aIL10	RVm17	twelve	aIL10_twelve	UNS	D03
1138	Sample_41	12	8	0.00627943	9.48262	9.5941	0.313623	Sample_41	AI_export_Plate 1 UNS LN_D3_D03_CD4p_Live.fcs	RVm17_aIL10_12_UNS	aIL10	RVm17	twelve	aIL10_twelve	UNS	D03
1139	Sample_41	13	25	0.0196232	18.6016	17.4779	3.31029	Sample_41	AI_export_Plate 1 UNS LN_D3_D03_CD4p_Live.fcs	RVm17_aIL10_12_UNS	aIL10	RVm17	twelve	aIL10_twelve	UNS	D03
1140	Sample_41	14	1	0.000784929	27.342	27.342	NA	Sample_41	AI_export_Plate 1 UNS LN_D3_D03_CD4p_Live.fcs	RVm17_aIL10_12_UNS	aIL10	RVm17	twelve	aIL10_twelve	UNS	D03
1141	Sample_41	15	4	0.00313972	NA	NA	NA	Sample_41	AI_export_Plate 1 UNS LN_D3_D03_CD4p_Live.fcs	RVm17_aIL10_12_UNS	aIL10	RVm17	twelve	aIL10_twelve	UNS	D03
1142	Sample_41	16	4	0.00313972	27.3476	27.3476	0.0217407	Sample_41	AI_export_Plate 1 UNS LN_D3_D03_CD4p_Live.fcs	RVm17_aIL10_12_UNS	aIL10	RVm17	twelve	aIL10_twelve	UNS	D03
1143	Sample_41	17	1	0.000784929	NA	NA	NA	Sample_41	AI_export_Plate 1 UNS LN_D3_D03_CD4p_Live.fcs	RVm17_aIL10_12_UNS	aIL10	RVm17	twelve	aIL10_twelve	UNS	D03
1144	Sample_41	18	0	0	NA	NA	NA	Sample_41	AI_export_Plate 1 UNS LN_D3_D03_CD4p_Live.fcs	RVm17_aIL10_12_UNS	aIL10	RVm17	twelve	aIL10_twelve	UNS	D03
1145	Sample_41	2	109	0.0855573	4.06719	3.56317	2.26906	Sample_41	AI_export_Plate 1 UNS LN_D3_D03_CD4p_Live.fcs	RVm17_aIL10_12_UNS	aIL10	RVm17	twelve	aIL10_twelve	UNS	D03
1146	Sample_41	3	278	0.21821	9.34043	9.40252	1.99163	Sample_41	AI_export_Plate 1 UNS LN_D3_D03_CD4p_Live.fcs	RVm17_aIL10_12_UNS	aIL10	RVm17	twelve	aIL10_twelve	UNS	D03
1147	Sample_41	4	104	0.0816327	18.2778	19.125	3.92325	Sample_41	AI_export_Plate 1 UNS LN_D3_D03_CD4p_Live.fcs	RVm17_aIL10_12_UNS	aIL10	RVm17	twelve	aIL10_twelve	UNS	D03
1148	Sample_41	5	145	0.113815	22.6832	22.7177	1.44972	Sample_41	AI_export_Plate 1 UNS LN_D3_D03_CD4p_Live.fcs	RVm17_aIL10_12_UNS	aIL10	RVm17	twelve	aIL10_twelve	UNS	D03
1149	Sample_41	6	142	0.11146	5.70567	5.64731	1.75799	Sample_41	AI_export_Plate 1 UNS LN_D3_D03_CD4p_Live.fcs	RVm17_aIL10_12_UNS	aIL10	RVm17	twelve	aIL10_twelve	UNS	D03
1150	Sample_41	7	61	0.0478807	20.1502	20.437	1.41298	Sample_41	AI_export_Plate 1 UNS LN_D3_D03_CD4p_Live.fcs	RVm17_aIL10_12_UNS	aIL10	RVm17	twelve	aIL10_twelve	UNS	D03
1151	Sample_41	8	41	0.0321821	25.6141	25.7154	0.5756	Sample_41	AI_export_Plate 1 UNS LN_D3_D03_CD4p_Live.fcs	RVm17_aIL10_12_UNS	aIL10	RVm17	twelve	aIL10_twelve	UNS	D03
1152	Sample_41	9	10	0.00784929	14.6677	12.9805	8.49148	Sample_41	AI_export_Plate 1 UNS LN_D3_D03_CD4p_Live.fcs	RVm17_aIL10_12_UNS	aIL10	RVm17	twelve	aIL10_twelve	UNS	D03
1153	Sample_42	1	233	0.182889	3.16441	2.87257	2.35466	Sample_42	AI_export_Plate 1 UNS LN_D4_D04_CD4p_Live.fcs	RBe17_Control_12_UNS	Control	RBe17	twelve	Control_twelve	UNS	D04
1154	Sample_42	10	136	0.10675	14.9821	14.8893	1.83273	Sample_42	AI_export_Plate 1 UNS LN_D4_D04_CD4p_Live.fcs	RBe17_Control_12_UNS	Control	RBe17	twelve	Control_twelve	UNS	D04
1155	Sample_42	11	2	0.00156986	26.9113	26.9113	0.913227	Sample_42	AI_export_Plate 1 UNS LN_D4_D04_CD4p_Live.fcs	RBe17_Control_12_UNS	Control	RBe17	twelve	Control_twelve	UNS	D04
1156	Sample_42	12	13	0.0102041	9.0182	9.54766	0.991034	Sample_42	AI_export_Plate 1 UNS LN_D4_D04_CD4p_Live.fcs	RBe17_Control_12_UNS	Control	RBe17	twelve	Control_twelve	UNS	D04
1157	Sample_42	13	20	0.0156986	19.0666	17.4779	1.79177	Sample_42	AI_export_Plate 1 UNS LN_D4_D04_CD4p_Live.fcs	RBe17_Control_12_UNS	Control	RBe17	twelve	Control_twelve	UNS	D04
1158	Sample_42	14	1	0.000784929	26.6741	26.6741	NA	Sample_42	AI_export_Plate 1 UNS LN_D4_D04_CD4p_Live.fcs	RBe17_Control_12_UNS	Control	RBe17	twelve	Control_twelve	UNS	D04
1159	Sample_42	15	0	0	NA	NA	NA	Sample_42	AI_export_Plate 1 UNS LN_D4_D04_CD4p_Live.fcs	RBe17_Control_12_UNS	Control	RBe17	twelve	Control_twelve	UNS	D04
1160	Sample_42	16	0	0	NA	NA	NA	Sample_42	AI_export_Plate 1 UNS LN_D4_D04_CD4p_Live.fcs	RBe17_Control_12_UNS	Control	RBe17	twelve	Control_twelve	UNS	D04
1161	Sample_42	17	1	0.000784929	NA	NA	NA	Sample_42	AI_export_Plate 1 UNS LN_D4_D04_CD4p_Live.fcs	RBe17_Control_12_UNS	Control	RBe17	twelve	Control_twelve	UNS	D04
1162	Sample_42	18	0	0	NA	NA	NA	Sample_42	AI_export_Plate 1 UNS LN_D4_D04_CD4p_Live.fcs	RBe17_Control_12_UNS	Control	RBe17	twelve	Control_twelve	UNS	D04
1163	Sample_42	2	179	0.140502	3.29424	3.09455	1.60823	Sample_42	AI_export_Plate 1 UNS LN_D4_D04_CD4p_Live.fcs	RBe17_Control_12_UNS	Control	RBe17	twelve	Control_twelve	UNS	D04
1164	Sample_42	3	256	0.200942	9.81109	9.80208	2.01955	Sample_42	AI_export_Plate 1 UNS LN_D4_D04_CD4p_Live.fcs	RBe17_Control_12_UNS	Control	RBe17	twelve	Control_twelve	UNS	D04
1165	Sample_42	4	120	0.0941915	19.2428	19.4809	3.20376	Sample_42	AI_export_Plate 1 UNS LN_D4_D04_CD4p_Live.fcs	RBe17_Control_12_UNS	Control	RBe17	twelve	Control_twelve	UNS	D04
1166	Sample_42	5	106	0.0832025	22.6328	22.9184	2.21752	Sample_42	AI_export_Plate 1 UNS LN_D4_D04_CD4p_Live.fcs	RBe17_Control_12_UNS	Control	RBe17	twelve	Control_twelve	UNS	D04
1167	Sample_42	6	131	0.102826	5.4816	5.64731	2.00546	Sample_42	AI_export_Plate 1 UNS LN_D4_D04_CD4p_Live.fcs	RBe17_Control_12_UNS	Control	RBe17	twelve	Control_twelve	UNS	D04
1168	Sample_42	7	27	0.0211931	19.5064	20.3545	1.72321	Sample_42	AI_export_Plate 1 UNS LN_D4_D04_CD4p_Live.fcs	RBe17_Control_12_UNS	Control	RBe17	twelve	Control_twelve	UNS	D04
1169	Sample_42	8	39	0.0306122	25.3833	25.5048	0.755319	Sample_42	AI_export_Plate 1 UNS LN_D4_D04_CD4p_Live.fcs	RBe17_Control_12_UNS	Control	RBe17	twelve	Control_twelve	UNS	D04
1170	Sample_42	9	10	0.00784929	17.1515	23.5609	8.27612	Sample_42	AI_export_Plate 1 UNS LN_D4_D04_CD4p_Live.fcs	RBe17_Control_12_UNS	Control	RBe17	twelve	Control_twelve	UNS	D04
1171	Sample_43	1	303	0.237834	3.29688	2.9651	2.72285	Sample_43	AI_export_Plate 1 UNS LN_D5_D05_CD4p_Live.fcs	RMl17_Control_12_UNS	Control	RMl17	twelve	Control_twelve	UNS	D05
1172	Sample_43	10	118	0.0926217	14.7879	14.6009	1.68927	Sample_43	AI_export_Plate 1 UNS LN_D5_D05_CD4p_Live.fcs	RMl17_Control_12_UNS	Control	RMl17	twelve	Control_twelve	UNS	D05
1173	Sample_43	11	12	0.00941915	27.1841	27.557	0.525176	Sample_43	AI_export_Plate 1 UNS LN_D5_D05_CD4p_Live.fcs	RMl17_Control_12_UNS	Control	RMl17	twelve	Control_twelve	UNS	D05
1174	Sample_43	12	2	0.00156986	4.86281	4.86281	5.96999	Sample_43	AI_export_Plate 1 UNS LN_D5_D05_CD4p_Live.fcs	RMl17_Control_12_UNS	Control	RMl17	twelve	Control_twelve	UNS	D05
1175	Sample_43	13	17	0.0133438	17.1746	17.4779	4.52303	Sample_43	AI_export_Plate 1 UNS LN_D5_D05_CD4p_Live.fcs	RMl17_Control_12_UNS	Control	RMl17	twelve	Control_twelve	UNS	D05
1176	Sample_43	14	0	0	NA	NA	NA	Sample_43	AI_export_Plate 1 UNS LN_D5_D05_CD4p_Live.fcs	RMl17_Control_12_UNS	Control	RMl17	twelve	Control_twelve	UNS	D05
1177	Sample_43	15	2	0.00156986	NA	NA	NA	Sample_43	AI_export_Plate 1 UNS LN_D5_D05_CD4p_Live.fcs	RMl17_Control_12_UNS	Control	RMl17	twelve	Control_twelve	UNS	D05
1178	Sample_43	16	4	0.00313972	27.1476	27.2143	0.275597	Sample_43	AI_export_Plate 1 UNS LN_D5_D05_CD4p_Live.fcs	RMl17_Control_12_UNS	Control	RMl17	twelve	Control_twelve	UNS	D05
1179	Sample_43	17	0	0	NA	NA	NA	Sample_43	AI_export_Plate 1 UNS LN_D5_D05_CD4p_Live.fcs	RMl17_Control_12_UNS	Control	RMl17	twelve	Control_twelve	UNS	D05
1180	Sample_43	18	0	0	NA	NA	NA	Sample_43	AI_export_Plate 1 UNS LN_D5_D05_CD4p_Live.fcs	RMl17_Control_12_UNS	Control	RMl17	twelve	Control_twelve	UNS	D05
1181	Sample_43	2	172	0.135008	3.59864	3.13899	2.69267	Sample_43	AI_export_Plate 1 UNS LN_D5_D05_CD4p_Live.fcs	RMl17_Control_12_UNS	Control	RMl17	twelve	Control_twelve	UNS	D05
1182	Sample_43	3	209	0.16405	9.47366	9.47208	2.04202	Sample_43	AI_export_Plate 1 UNS LN_D5_D05_CD4p_Live.fcs	RMl17_Control_12_UNS	Control	RMl17	twelve	Control_twelve	UNS	D05
1183	Sample_43	4	122	0.0957614	18.285	18.9646	3.98225	Sample_43	AI_export_Plate 1 UNS LN_D5_D05_CD4p_Live.fcs	RMl17_Control_12_UNS	Control	RMl17	twelve	Control_twelve	UNS	D05
1184	Sample_43	5	81	0.0635793	22.762	23.173	2.1331	Sample_43	AI_export_Plate 1 UNS LN_D5_D05_CD4p_Live.fcs	RMl17_Control_12_UNS	Control	RMl17	twelve	Control_twelve	UNS	D05
1185	Sample_43	6	150	0.117739	5.74265	6.12666	1.47781	Sample_43	AI_export_Plate 1 UNS LN_D5_D05_CD4p_Live.fcs	RMl17_Control_12_UNS	Control	RMl17	twelve	Control_twelve	UNS	D05
1186	Sample_43	7	29	0.022763	19.5299	20.4193	2.83413	Sample_43	AI_export_Plate 1 UNS LN_D5_D05_CD4p_Live.fcs	RMl17_Control_12_UNS	Control	RMl17	twelve	Control_twelve	UNS	D05
1187	Sample_43	8	42	0.032967	25.4841	25.5048	0.536694	Sample_43	AI_export_Plate 1 UNS LN_D5_D05_CD4p_Live.fcs	RMl17_Control_12_UNS	Control	RMl17	twelve	Control_twelve	UNS	D05
1188	Sample_43	9	11	0.00863422	20.33	23.5609	6.20142	Sample_43	AI_export_Plate 1 UNS LN_D5_D05_CD4p_Live.fcs	RMl17_Control_12_UNS	Control	RMl17	twelve	Control_twelve	UNS	D05
1189	Sample_44	1	248	0.194662	2.8312	2.27482	2.47417	Sample_44	AI_export_Plate 1 UNS LN_D6_D06_CD4p_export_Plate 1 UNS LN_D6_D06_CD4p_Live.fcs	RIb17_aIL10+aPD1_12_UNS	aIL10+aPD1	RIb17	twelve	aIL10+aPD1_twelve	UNS	D06
1190	Sample_44	10	120	0.0941915	14.9435	15.0743	1.94403	Sample_44	AI_export_Plate 1 UNS LN_D6_D06_CD4p_export_Plate 1 UNS LN_D6_D06_CD4p_Live.fcs	RIb17_aIL10+aPD1_12_UNS	aIL10+aPD1	RIb17	twelve	aIL10+aPD1_twelve	UNS	D06
1191	Sample_44	11	13	0.0102041	27.3398	27.557	0.445145	Sample_44	AI_export_Plate 1 UNS LN_D6_D06_CD4p_export_Plate 1 UNS LN_D6_D06_CD4p_Live.fcs	RIb17_aIL10+aPD1_12_UNS	aIL10+aPD1	RIb17	twelve	aIL10+aPD1_twelve	UNS	D06
1192	Sample_44	12	3	0.00235479	13.4484	9.63968	6.60426	Sample_44	AI_export_Plate 1 UNS LN_D6_D06_CD4p_export_Plate 1 UNS LN_D6_D06_CD4p_Live.fcs	RIb17_aIL10+aPD1_12_UNS	aIL10+aPD1	RIb17	twelve	aIL10+aPD1_twelve	UNS	D06
1193	Sample_44	13	16	0.0125589	18.2948	17.4779	5.20639	Sample_44	AI_export_Plate 1 UNS LN_D6_D06_CD4p_export_Plate 1 UNS LN_D6_D06_CD4p_Live.fcs	RIb17_aIL10+aPD1_12_UNS	aIL10+aPD1	RIb17	twelve	aIL10+aPD1_twelve	UNS	D06
1194	Sample_44	14	1	0.000784929	NA	NA	NA	Sample_44	AI_export_Plate 1 UNS LN_D6_D06_CD4p_export_Plate 1 UNS LN_D6_D06_CD4p_Live.fcs	RIb17_aIL10+aPD1_12_UNS	aIL10+aPD1	RIb17	twelve	aIL10+aPD1_twelve	UNS	D06
1195	Sample_44	15	3	0.00235479	NA	NA	NA	Sample_44	AI_export_Plate 1 UNS LN_D6_D06_CD4p_export_Plate 1 UNS LN_D6_D06_CD4p_Live.fcs	RIb17_aIL10+aPD1_12_UNS	aIL10+aPD1	RIb17	twelve	aIL10+aPD1_twelve	UNS	D06
1196	Sample_44	16	4	0.00313972	27.1429	27.1799	0.22915	Sample_44	AI_export_Plate 1 UNS LN_D6_D06_CD4p_export_Plate 1 UNS LN_D6_D06_CD4p_Live.fcs	RIb17_aIL10+aPD1_12_UNS	aIL10+aPD1	RIb17	twelve	aIL10+aPD1_twelve	UNS	D06
1197	Sample_44	17	1	0.000784929	NA	NA	NA	Sample_44	AI_export_Plate 1 UNS LN_D6_D06_CD4p_export_Plate 1 UNS LN_D6_D06_CD4p_Live.fcs	RIb17_aIL10+aPD1_12_UNS	aIL10+aPD1	RIb17	twelve	aIL10+aPD1_twelve	UNS	D06
1198	Sample_44	18	1	0.000784929	3.63782	3.63782	NA	Sample_44	AI_export_Plate 1 UNS LN_D6_D06_CD4p_export_Plate 1 UNS LN_D6_D06_CD4p_Live.fcs	RIb17_aIL10+aPD1_12_UNS	aIL10+aPD1	RIb17	twelve	aIL10+aPD1_twelve	UNS	D06
1199	Sample_44	2	281	0.220565	3.37399	3.06517	2.32998	Sample_44	AI_export_Plate 1 UNS LN_D6_D06_CD4p_export_Plate 1 UNS LN_D6_D06_CD4p_Live.fcs	RIb17_aIL10+aPD1_12_UNS	aIL10+aPD1	RIb17	twelve	aIL10+aPD1_twelve	UNS	D06
1200	Sample_44	3	157	0.123234	9.55899	9.8575	1.86625	Sample_44	AI_export_Plate 1 UNS LN_D6_D06_CD4p_export_Plate 1 UNS LN_D6_D06_CD4p_Live.fcs	RIb17_aIL10+aPD1_12_UNS	aIL10+aPD1	RIb17	twelve	aIL10+aPD1_twelve	UNS	D06
1201	Sample_44	4	109	0.0855573	18.6362	19.1564	3.13459	Sample_44	AI_export_Plate 1 UNS LN_D6_D06_CD4p_export_Plate 1 UNS LN_D6_D06_CD4p_Live.fcs	RIb17_aIL10+aPD1_12_UNS	aIL10+aPD1	RIb17	twelve	aIL10+aPD1_twelve	UNS	D06
1202	Sample_44	5	96	0.0753532	23.2084	23.436	1.00697	Sample_44	AI_export_Plate 1 UNS LN_D6_D06_CD4p_export_Plate 1 UNS LN_D6_D06_CD4p_Live.fcs	RIb17_aIL10+aPD1_12_UNS	aIL10+aPD1	RIb17	twelve	aIL10+aPD1_twelve	UNS	D06
1203	Sample_44	6	101	0.0792779	5.78784	5.64731	2.41828	Sample_44	AI_export_Plate 1 UNS LN_D6_D06_CD4p_export_Plate 1 UNS LN_D6_D06_CD4p_Live.fcs	RIb17_aIL10+aPD1_12_UNS	aIL10+aPD1	RIb17	twelve	aIL10+aPD1_twelve	UNS	D06
1204	Sample_44	7	25	0.0196232	17.7424	18.1712	4.32772	Sample_44	AI_export_Plate 1 UNS LN_D6_D06_CD4p_export_Plate 1 UNS LN_D6_D06_CD4p_Live.fcs	RIb17_aIL10+aPD1_12_UNS	aIL10+aPD1	RIb17	twelve	aIL10+aPD1_twelve	UNS	D06
1205	Sample_44	8	83	0.0651491	25.347	25.391	0.293894	Sample_44	AI_export_Plate 1 UNS LN_D6_D06_CD4p_export_Plate 1 UNS LN_D6_D06_CD4p_Live.fcs	RIb17_aIL10+aPD1_12_UNS	aIL10+aPD1	RIb17	twelve	aIL10+aPD1_twelve	UNS	D06
1206	Sample_44	9	12	0.00941915	20.83	23.5609	6.32015	Sample_44	AI_export_Plate 1 UNS LN_D6_D06_CD4p_export_Plate 1 UNS LN_D6_D06_CD4p_Live.fcs	RIb17_aIL10+aPD1_12_UNS	aIL10+aPD1	RIb17	twelve	aIL10+aPD1_twelve	UNS	D06
1207	Sample_45	1	230	0.180534	3.54527	3.45217	2.4345	Sample_45	AI_export_Plate 1 UNS LN_D7_D07_CD4p_Live.fcs	RFl17_aIL10+aPD1_21_UNS	aIL10+aPD1	RFl17	twenty_one	aIL10+aPD1_twenty_one	UNS	D07
1208	Sample_45	10	149	0.116954	15.239	15.614	1.73283	Sample_45	AI_export_Plate 1 UNS LN_D7_D07_CD4p_Live.fcs	RFl17_aIL10+aPD1_21_UNS	aIL10+aPD1	RFl17	twenty_one	aIL10+aPD1_twenty_one	UNS	D07
1209	Sample_45	11	10	0.00784929	26.4582	27.557	3.15909	Sample_45	AI_export_Plate 1 UNS LN_D7_D07_CD4p_Live.fcs	RFl17_aIL10+aPD1_21_UNS	aIL10+aPD1	RFl17	twenty_one	aIL10+aPD1_twenty_one	UNS	D07
1210	Sample_45	12	8	0.00627943	9.39502	9.61658	0.605307	Sample_45	AI_export_Plate 1 UNS LN_D7_D07_CD4p_Live.fcs	RFl17_aIL10+aPD1_21_UNS	aIL10+aPD1	RFl17	twenty_one	aIL10+aPD1_twenty_one	UNS	D07
1211	Sample_45	13	16	0.0125589	18.7143	17.4779	2.73169	Sample_45	AI_export_Plate 1 UNS LN_D7_D07_CD4p_Live.fcs	RFl17_aIL10+aPD1_21_UNS	aIL10+aPD1	RFl17	twenty_one	aIL10+aPD1_twenty_one	UNS	D07
1212	Sample_45	14	1	0.000784929	27.342	27.342	NA	Sample_45	AI_export_Plate 1 UNS LN_D7_D07_CD4p_Live.fcs	RFl17_aIL10+aPD1_21_UNS	aIL10+aPD1	RFl17	twenty_one	aIL10+aPD1_twenty_one	UNS	D07
1213	Sample_45	15	0	0	NA	NA	NA	Sample_45	AI_export_Plate 1 UNS LN_D7_D07_CD4p_Live.fcs	RFl17_aIL10+aPD1_21_UNS	aIL10+aPD1	RFl17	twenty_one	aIL10+aPD1_twenty_one	UNS	D07
1214	Sample_45	16	0	0	NA	NA	NA	Sample_45	AI_export_Plate 1 UNS LN_D7_D07_CD4p_Live.fcs	RFl17_aIL10+aPD1_21_UNS	aIL10+aPD1	RFl17	twenty_one	aIL10+aPD1_twenty_one	UNS	D07
1215	Sample_45	17	0	0	NA	NA	NA	Sample_45	AI_export_Plate 1 UNS LN_D7_D07_CD4p_Live.fcs	RFl17_aIL10+aPD1_21_UNS	aIL10+aPD1	RFl17	twenty_one	aIL10+aPD1_twenty_one	UNS	D07
1216	Sample_45	18	0	0	NA	NA	NA	Sample_45	AI_export_Plate 1 UNS LN_D7_D07_CD4p_Live.fcs	RFl17_aIL10+aPD1_21_UNS	aIL10+aPD1	RFl17	twenty_one	aIL10+aPD1_twenty_one	UNS	D07
1217	Sample_45	2	226	0.177394	3.57877	3.11896	2.36665	Sample_45	AI_export_Plate 1 UNS LN_D7_D07_CD4p_Live.fcs	RFl17_aIL10+aPD1_21_UNS	aIL10+aPD1	RFl17	twenty_one	aIL10+aPD1_twenty_one	UNS	D07
1218	Sample_45	3	190	0.149137	9.66318	9.83341	2.02619	Sample_45	AI_export_Plate 1 UNS LN_D7_D07_CD4p_Live.fcs	RFl17_aIL10+aPD1_21_UNS	aIL10+aPD1	RFl17	twenty_one	aIL10+aPD1_twenty_one	UNS	D07
1219	Sample_45	4	102	0.0800628	18.7358	18.7193	3.01397	Sample_45	AI_export_Plate 1 UNS LN_D7_D07_CD4p_Live.fcs	RFl17_aIL10+aPD1_21_UNS	aIL10+aPD1	RFl17	twenty_one	aIL10+aPD1_twenty_one	UNS	D07
1220	Sample_45	5	105	0.0824176	22.9186	22.7519	1.16156	Sample_45	AI_export_Plate 1 UNS LN_D7_D07_CD4p_Live.fcs	RFl17_aIL10+aPD1_21_UNS	aIL10+aPD1	RFl17	twenty_one	aIL10+aPD1_twenty_one	UNS	D07
1221	Sample_45	6	142	0.11146	5.86647	5.99764	1.72472	Sample_45	AI_export_Plate 1 UNS LN_D7_D07_CD4p_Live.fcs	RFl17_aIL10+aPD1_21_UNS	aIL10+aPD1	RFl17	twenty_one	aIL10+aPD1_twenty_one	UNS	D07
1222	Sample_45	7	42	0.032967	18.7455	20.0789	2.9868	Sample_45	AI_export_Plate 1 UNS LN_D7_D07_CD4p_Live.fcs	RFl17_aIL10+aPD1_21_UNS	aIL10+aPD1	RFl17	twenty_one	aIL10+aPD1_twenty_one	UNS	D07
1223	Sample_45	8	34	0.0266876	25.3126	25.4509	0.703607	Sample_45	AI_export_Plate 1 UNS LN_D7_D07_CD4p_Live.fcs	RFl17_aIL10+aPD1_21_UNS	aIL10+aPD1	RFl17	twenty_one	aIL10+aPD1_twenty_one	UNS	D07
1224	Sample_45	9	19	0.0149137	15.9321	19.2912	8.26435	Sample_45	AI_export_Plate 1 UNS LN_D7_D07_CD4p_Live.fcs	RFl17_aIL10+aPD1_21_UNS	aIL10+aPD1	RFl17	twenty_one	aIL10+aPD1_twenty_one	UNS	D07
1225	Sample_46	1	197	0.154631	3.20619	2.68682	2.68543	Sample_46	AI_export_Plate 1 UNS LN_D8_D08_CD4p_export_Plate 1 UNS LN_D8_D08_CD4p_Live.fcs	RYk17_aIL10_21_UNS	aIL10	RYk17	twenty_one	aIL10_twenty_one	UNS	D08
1226	Sample_46	10	161	0.126374	15.2528	15.6775	1.48066	Sample_46	AI_export_Plate 1 UNS LN_D8_D08_CD4p_export_Plate 1 UNS LN_D8_D08_CD4p_Live.fcs	RYk17_aIL10_21_UNS	aIL10	RYk17	twenty_one	aIL10_twenty_one	UNS	D08
1227	Sample_46	11	10	0.00784929	27.3423	27.4378	0.303466	Sample_46	AI_export_Plate 1 UNS LN_D8_D08_CD4p_export_Plate 1 UNS LN_D8_D08_CD4p_Live.fcs	RYk17_aIL10_21_UNS	aIL10	RYk17	twenty_one	aIL10_twenty_one	UNS	D08
1228	Sample_46	12	8	0.00627943	10.8817	9.61244	3.73712	Sample_46	AI_export_Plate 1 UNS LN_D8_D08_CD4p_export_Plate 1 UNS LN_D8_D08_CD4p_Live.fcs	RYk17_aIL10_21_UNS	aIL10	RYk17	twenty_one	aIL10_twenty_one	UNS	D08
1229	Sample_46	13	21	0.0164835	16.9384	17.4779	3.61271	Sample_46	AI_export_Plate 1 UNS LN_D8_D08_CD4p_export_Plate 1 UNS LN_D8_D08_CD4p_Live.fcs	RYk17_aIL10_21_UNS	aIL10	RYk17	twenty_one	aIL10_twenty_one	UNS	D08
1230	Sample_46	14	1	0.000784929	27.342	27.342	NA	Sample_46	AI_export_Plate 1 UNS LN_D8_D08_CD4p_export_Plate 1 UNS LN_D8_D08_CD4p_Live.fcs	RYk17_aIL10_21_UNS	aIL10	RYk17	twenty_one	aIL10_twenty_one	UNS	D08
1231	Sample_46	15	0	0	NA	NA	NA	Sample_46	AI_export_Plate 1 UNS LN_D8_D08_CD4p_export_Plate 1 UNS LN_D8_D08_CD4p_Live.fcs	RYk17_aIL10_21_UNS	aIL10	RYk17	twenty_one	aIL10_twenty_one	UNS	D08
1232	Sample_46	16	0	0	NA	NA	NA	Sample_46	AI_export_Plate 1 UNS LN_D8_D08_CD4p_export_Plate 1 UNS LN_D8_D08_CD4p_Live.fcs	RYk17_aIL10_21_UNS	aIL10	RYk17	twenty_one	aIL10_twenty_one	UNS	D08
1233	Sample_46	17	1	0.000784929	NA	NA	NA	Sample_46	AI_export_Plate 1 UNS LN_D8_D08_CD4p_export_Plate 1 UNS LN_D8_D08_CD4p_Live.fcs	RYk17_aIL10_21_UNS	aIL10	RYk17	twenty_one	aIL10_twenty_one	UNS	D08
1234	Sample_46	18	0	0	NA	NA	NA	Sample_46	AI_export_Plate 1 UNS LN_D8_D08_CD4p_export_Plate 1 UNS LN_D8_D08_CD4p_Live.fcs	RYk17_aIL10_21_UNS	aIL10	RYk17	twenty_one	aIL10_twenty_one	UNS	D08
1235	Sample_46	2	293	0.229984	3.31855	3.12701	1.9028	Sample_46	AI_export_Plate 1 UNS LN_D8_D08_CD4p_export_Plate 1 UNS LN_D8_D08_CD4p_Live.fcs	RYk17_aIL10_21_UNS	aIL10	RYk17	twenty_one	aIL10_twenty_one	UNS	D08
1236	Sample_46	3	141	0.110675	9.59603	9.5006	2.22144	Sample_46	AI_export_Plate 1 UNS LN_D8_D08_CD4p_export_Plate 1 UNS LN_D8_D08_CD4p_Live.fcs	RYk17_aIL10_21_UNS	aIL10	RYk17	twenty_one	aIL10_twenty_one	UNS	D08
1237	Sample_46	4	133	0.104396	18.2975	18.6175	3.45398	Sample_46	AI_export_Plate 1 UNS LN_D8_D08_CD4p_export_Plate 1 UNS LN_D8_D08_CD4p_Live.fcs	RYk17_aIL10_21_UNS	aIL10	RYk17	twenty_one	aIL10_twenty_one	UNS	D08
1238	Sample_46	5	97	0.0761381	22.523	22.8465	2.88785	Sample_46	AI_export_Plate 1 UNS LN_D8_D08_CD4p_export_Plate 1 UNS LN_D8_D08_CD4p_Live.fcs	RYk17_aIL10_21_UNS	aIL10	RYk17	twenty_one	aIL10_twenty_one	UNS	D08
1239	Sample_46	6	117	0.0918367	5.68234	5.76397	2.27712	Sample_46	AI_export_Plate 1 UNS LN_D8_D08_CD4p_export_Plate 1 UNS LN_D8_D08_CD4p_Live.fcs	RYk17_aIL10_21_UNS	aIL10	RYk17	twenty_one	aIL10_twenty_one	UNS	D08
1240	Sample_46	7	62	0.0486656	19.3163	20.3145	2.7417	Sample_46	AI_export_Plate 1 UNS LN_D8_D08_CD4p_export_Plate 1 UNS LN_D8_D08_CD4p_Live.fcs	RYk17_aIL10_21_UNS	aIL10	RYk17	twenty_one	aIL10_twenty_one	UNS	D08
1241	Sample_46	8	22	0.0172684	25.0429	25.3271	1.29238	Sample_46	AI_export_Plate 1 UNS LN_D8_D08_CD4p_export_Plate 1 UNS LN_D8_D08_CD4p_Live.fcs	RYk17_aIL10_21_UNS	aIL10	RYk17	twenty_one	aIL10_twenty_one	UNS	D08
1242	Sample_46	9	10	0.00784929	16.3999	20.4686	8.13878	Sample_46	AI_export_Plate 1 UNS LN_D8_D08_CD4p_export_Plate 1 UNS LN_D8_D08_CD4p_Live.fcs	RYk17_aIL10_21_UNS	aIL10	RYk17	twenty_one	aIL10_twenty_one	UNS	D08
1243	Sample_47	1	162	0.127159	3.39661	3.07051	2.72875	Sample_47	AI_export_Plate 1 UNS LN_D9_D09_CD4p_Live.fcs	RVz16_Control_21_UNS	Control	RVz16	twenty_one	Control_twenty_one	UNS	D09
1244	Sample_47	10	201	0.157771	15.1626	15.5111	1.71525	Sample_47	AI_export_Plate 1 UNS LN_D9_D09_CD4p_Live.fcs	RVz16_Control_21_UNS	Control	RVz16	twenty_one	Control_twenty_one	UNS	D09
1245	Sample_47	11	5	0.00392465	27.5296	27.557	0.0613828	Sample_47	AI_export_Plate 1 UNS LN_D9_D09_CD4p_Live.fcs	RVz16_Control_21_UNS	Control	RVz16	twenty_one	Control_twenty_one	UNS	D09
1246	Sample_47	12	5	0.00392465	9.2584	9.61244	0.80054	Sample_47	AI_export_Plate 1 UNS LN_D9_D09_CD4p_Live.fcs	RVz16_Control_21_UNS	Control	RVz16	twenty_one	Control_twenty_one	UNS	D09
1247	Sample_47	13	18	0.0141287	17.595	17.4779	0.920705	Sample_47	AI_export_Plate 1 UNS LN_D9_D09_CD4p_Live.fcs	RVz16_Control_21_UNS	Control	RVz16	twenty_one	Control_twenty_one	UNS	D09
1248	Sample_47	14	1	0.000784929	27.342	27.342	NA	Sample_47	AI_export_Plate 1 UNS LN_D9_D09_CD4p_Live.fcs	RVz16_Control_21_UNS	Control	RVz16	twenty_one	Control_twenty_one	UNS	D09
1249	Sample_47	15	3	0.00235479	NA	NA	NA	Sample_47	AI_export_Plate 1 UNS LN_D9_D09_CD4p_Live.fcs	RVz16_Control_21_UNS	Control	RVz16	twenty_one	Control_twenty_one	UNS	D09
1250	Sample_47	16	2	0.00156986	26.905	26.905	0.210936	Sample_47	AI_export_Plate 1 UNS LN_D9_D09_CD4p_Live.fcs	RVz16_Control_21_UNS	Control	RVz16	twenty_one	Control_twenty_one	UNS	D09
1251	Sample_47	17	1	0.000784929	NA	NA	NA	Sample_47	AI_export_Plate 1 UNS LN_D9_D09_CD4p_Live.fcs	RVz16_Control_21_UNS	Control	RVz16	twenty_one	Control_twenty_one	UNS	D09
1252	Sample_47	18	4	0.00313972	9.11535	9.11535	7.75779	Sample_47	AI_export_Plate 1 UNS LN_D9_D09_CD4p_Live.fcs	RVz16_Control_21_UNS	Control	RVz16	twenty_one	Control_twenty_one	UNS	D09
1253	Sample_47	2	185	0.145212	4.23345	3.56635	2.4783	Sample_47	AI_export_Plate 1 UNS LN_D9_D09_CD4p_Live.fcs	RVz16_Control_21_UNS	Control	RVz16	twenty_one	Control_twenty_one	UNS	D09
1254	Sample_47	3	190	0.149137	10.3011	10.2418	2.4166	Sample_47	AI_export_Plate 1 UNS LN_D9_D09_CD4p_Live.fcs	RVz16_Control_21_UNS	Control	RVz16	twenty_one	Control_twenty_one	UNS	D09
1255	Sample_47	4	107	0.0839874	17.9203	18.2169	3.70244	Sample_47	AI_export_Plate 1 UNS LN_D9_D09_CD4p_Live.fcs	RVz16_Control_21_UNS	Control	RVz16	twenty_one	Control_twenty_one	UNS	D09
1256	Sample_47	5	108	0.0847724	22.3853	22.7177	2.90754	Sample_47	AI_export_Plate 1 UNS LN_D9_D09_CD4p_Live.fcs	RVz16_Control_21_UNS	Control	RVz16	twenty_one	Control_twenty_one	UNS	D09
1257	Sample_47	6	174	0.136578	5.35576	5.49249	1.57337	Sample_47	AI_export_Plate 1 UNS LN_D9_D09_CD4p_Live.fcs	RVz16_Control_21_UNS	Control	RVz16	twenty_one	Control_twenty_one	UNS	D09
1258	Sample_47	7	54	0.0423862	19.1546	20.0848	2.02307	Sample_47	AI_export_Plate 1 UNS LN_D9_D09_CD4p_Live.fcs	RVz16_Control_21_UNS	Control	RVz16	twenty_one	Control_twenty_one	UNS	D09
1259	Sample_47	8	28	0.021978	25.685	25.8357	0.554594	Sample_47	AI_export_Plate 1 UNS LN_D9_D09_CD4p_Live.fcs	RVz16_Control_21_UNS	Control	RVz16	twenty_one	Control_twenty_one	UNS	D09
1260	Sample_47	9	26	0.0204082	19.5375	23.5609	6.83544	Sample_47	AI_export_Plate 1 UNS LN_D9_D09_CD4p_Live.fcs	RVz16_Control_21_UNS	Control	RVz16	twenty_one	Control_twenty_one	UNS	D09
1261	Sample_48	1	226	0.177394	3.23487	2.89024	2.75687	Sample_48	AI_export_Plate 1 UNS LN_E1_E01_CD4p_Live.fcs	RTd17_Control_21_UNS	Control	RTd17	twenty_one	Control_twenty_one	UNS	E01
1262	Sample_48	10	70	0.0549451	14.6421	15.2108	2.44484	Sample_48	AI_export_Plate 1 UNS LN_E1_E01_CD4p_Live.fcs	RTd17_Control_21_UNS	Control	RTd17	twenty_one	Control_twenty_one	UNS	E01
1263	Sample_48	11	39	0.0306122	27.3373	27.4539	0.294332	Sample_48	AI_export_Plate 1 UNS LN_E1_E01_CD4p_Live.fcs	RTd17_Control_21_UNS	Control	RTd17	twenty_one	Control_twenty_one	UNS	E01
1264	Sample_48	12	16	0.0125589	9.58878	9.61244	0.0638485	Sample_48	AI_export_Plate 1 UNS LN_E1_E01_CD4p_Live.fcs	RTd17_Control_21_UNS	Control	RTd17	twenty_one	Control_twenty_one	UNS	E01
1265	Sample_48	13	16	0.0125589	16.7706	17.4779	4.56714	Sample_48	AI_export_Plate 1 UNS LN_E1_E01_CD4p_Live.fcs	RTd17_Control_21_UNS	Control	RTd17	twenty_one	Control_twenty_one	UNS	E01
1266	Sample_48	14	2	0.00156986	27.0081	27.0081	0.472266	Sample_48	AI_export_Plate 1 UNS LN_E1_E01_CD4p_Live.fcs	RTd17_Control_21_UNS	Control	RTd17	twenty_one	Control_twenty_one	UNS	E01
1267	Sample_48	15	2	0.00156986	NA	NA	NA	Sample_48	AI_export_Plate 1 UNS LN_E1_E01_CD4p_Live.fcs	RTd17_Control_21_UNS	Control	RTd17	twenty_one	Control_twenty_one	UNS	E01
1268	Sample_48	16	9	0.00706436	27.0462	27.0432	0.261841	Sample_48	AI_export_Plate 1 UNS LN_E1_E01_CD4p_Live.fcs	RTd17_Control_21_UNS	Control	RTd17	twenty_one	Control_twenty_one	UNS	E01
1269	Sample_48	17	1	0.000784929	NA	NA	NA	Sample_48	AI_export_Plate 1 UNS LN_E1_E01_CD4p_Live.fcs	RTd17_Control_21_UNS	Control	RTd17	twenty_one	Control_twenty_one	UNS	E01
1270	Sample_48	18	1	0.000784929	3.59431	3.59431	NA	Sample_48	AI_export_Plate 1 UNS LN_E1_E01_CD4p_Live.fcs	RTd17_Control_21_UNS	Control	RTd17	twenty_one	Control_twenty_one	UNS	E01
1271	Sample_48	2	178	0.139717	3.47865	3.04573	2.14334	Sample_48	AI_export_Plate 1 UNS LN_E1_E01_CD4p_Live.fcs	RTd17_Control_21_UNS	Control	RTd17	twenty_one	Control_twenty_one	UNS	E01
1272	Sample_48	3	147	0.115385	9.75849	9.95709	2.19373	Sample_48	AI_export_Plate 1 UNS LN_E1_E01_CD4p_Live.fcs	RTd17_Control_21_UNS	Control	RTd17	twenty_one	Control_twenty_one	UNS	E01
1273	Sample_48	4	85	0.066719	18.5301	18.9644	2.74279	Sample_48	AI_export_Plate 1 UNS LN_E1_E01_CD4p_Live.fcs	RTd17_Control_21_UNS	Control	RTd17	twenty_one	Control_twenty_one	UNS	E01
1274	Sample_48	5	134	0.105181	23.0485	23.6061	2.33809	Sample_48	AI_export_Plate 1 UNS LN_E1_E01_CD4p_Live.fcs	RTd17_Control_21_UNS	Control	RTd17	twenty_one	Control_twenty_one	UNS	E01
1275	Sample_48	6	110	0.0863422	5.54204	5.84446	1.92877	Sample_48	AI_export_Plate 1 UNS LN_E1_E01_CD4p_Live.fcs	RTd17_Control_21_UNS	Control	RTd17	twenty_one	Control_twenty_one	UNS	E01
1276	Sample_48	7	40	0.0313972	19.4738	20.1805	3.04293	Sample_48	AI_export_Plate 1 UNS LN_E1_E01_CD4p_Live.fcs	RTd17_Control_21_UNS	Control	RTd17	twenty_one	Control_twenty_one	UNS	E01
1277	Sample_48	8	145	0.113815	25.7321	25.8357	0.431258	Sample_48	AI_export_Plate 1 UNS LN_E1_E01_CD4p_Live.fcs	RTd17_Control_21_UNS	Control	RTd17	twenty_one	Control_twenty_one	UNS	E01
1278	Sample_48	9	53	0.0416013	21.1238	23.5609	5.63831	Sample_48	AI_export_Plate 1 UNS LN_E1_E01_CD4p_Live.fcs	RTd17_Control_21_UNS	Control	RTd17	twenty_one	Control_twenty_one	UNS	E01
1279	Sample_49	1	190	0.149137	3.4553	3.24365	2.7498	Sample_49	AI_export_Plate 1 UNS LN_E10_E10_CD4p_Live.fcs	RYk17_aIL10_36_UNS	aIL10	RYk17	thirty_six	aIL10_thirty_six	UNS	E10
1280	Sample_49	10	216	0.169545	15.0572	15.3481	1.72029	Sample_49	AI_export_Plate 1 UNS LN_E10_E10_CD4p_Live.fcs	RYk17_aIL10_36_UNS	aIL10	RYk17	thirty_six	aIL10_thirty_six	UNS	E10
1281	Sample_49	11	7	0.00549451	27.5191	27.557	0.0605679	Sample_49	AI_export_Plate 1 UNS LN_E10_E10_CD4p_Live.fcs	RYk17_aIL10_36_UNS	aIL10	RYk17	thirty_six	aIL10_thirty_six	UNS	E10
1282	Sample_49	12	5	0.00392465	9.09178	9.61245	1.05482	Sample_49	AI_export_Plate 1 UNS LN_E10_E10_CD4p_Live.fcs	RYk17_aIL10_36_UNS	aIL10	RYk17	thirty_six	aIL10_thirty_six	UNS	E10
1283	Sample_49	13	20	0.0156986	18.0009	17.4779	3.0147	Sample_49	AI_export_Plate 1 UNS LN_E10_E10_CD4p_Live.fcs	RYk17_aIL10_36_UNS	aIL10	RYk17	thirty_six	aIL10_thirty_six	UNS	E10
1284	Sample_49	14	2	0.00156986	27.342	27.342	4.91847e-09	Sample_49	AI_export_Plate 1 UNS LN_E10_E10_CD4p_Live.fcs	RYk17_aIL10_36_UNS	aIL10	RYk17	thirty_six	aIL10_thirty_six	UNS	E10
1285	Sample_49	15	0	0	NA	NA	NA	Sample_49	AI_export_Plate 1 UNS LN_E10_E10_CD4p_Live.fcs	RYk17_aIL10_36_UNS	aIL10	RYk17	thirty_six	aIL10_thirty_six	UNS	E10
1286	Sample_49	16	0	0	NA	NA	NA	Sample_49	AI_export_Plate 1 UNS LN_E10_E10_CD4p_Live.fcs	RYk17_aIL10_36_UNS	aIL10	RYk17	thirty_six	aIL10_thirty_six	UNS	E10
1287	Sample_49	17	1	0.000784929	NA	NA	NA	Sample_49	AI_export_Plate 1 UNS LN_E10_E10_CD4p_Live.fcs	RYk17_aIL10_36_UNS	aIL10	RYk17	thirty_six	aIL10_thirty_six	UNS	E10
1288	Sample_49	18	0	0	NA	NA	NA	Sample_49	AI_export_Plate 1 UNS LN_E10_E10_CD4p_Live.fcs	RYk17_aIL10_36_UNS	aIL10	RYk17	thirty_six	aIL10_thirty_six	UNS	E10
1289	Sample_49	2	218	0.171115	3.82123	3.22436	3.47591	Sample_49	AI_export_Plate 1 UNS LN_E10_E10_CD4p_Live.fcs	RYk17_aIL10_36_UNS	aIL10	RYk17	thirty_six	aIL10_thirty_six	UNS	E10
1290	Sample_49	3	190	0.149137	9.74713	9.64457	2.5172	Sample_49	AI_export_Plate 1 UNS LN_E10_E10_CD4p_Live.fcs	RYk17_aIL10_36_UNS	aIL10	RYk17	thirty_six	aIL10_thirty_six	UNS	E10
1291	Sample_49	4	158	0.124019	18.7123	18.8162	2.675	Sample_49	AI_export_Plate 1 UNS LN_E10_E10_CD4p_Live.fcs	RYk17_aIL10_36_UNS	aIL10	RYk17	thirty_six	aIL10_thirty_six	UNS	E10
1292	Sample_49	5	79	0.0620094	22.676	23.1837	2.72678	Sample_49	AI_export_Plate 1 UNS LN_E10_E10_CD4p_Live.fcs	RYk17_aIL10_36_UNS	aIL10	RYk17	thirty_six	aIL10_thirty_six	UNS	E10
1293	Sample_49	6	94	0.0737834	5.89308	6.09585	1.49356	Sample_49	AI_export_Plate 1 UNS LN_E10_E10_CD4p_Live.fcs	RYk17_aIL10_36_UNS	aIL10	RYk17	thirty_six	aIL10_thirty_six	UNS	E10
1294	Sample_49	7	58	0.0455259	19.7637	20.4193	2.03806	Sample_49	AI_export_Plate 1 UNS LN_E10_E10_CD4p_Live.fcs	RYk17_aIL10_36_UNS	aIL10	RYk17	thirty_six	aIL10_thirty_six	UNS	E10
1295	Sample_49	8	18	0.0141287	24.4088	25.5225	4.43822	Sample_49	AI_export_Plate 1 UNS LN_E10_E10_CD4p_Live.fcs	RYk17_aIL10_36_UNS	aIL10	RYk17	thirty_six	aIL10_thirty_six	UNS	E10
1296	Sample_49	9	18	0.0141287	16.7423	23.3095	8.1607	Sample_49	AI_export_Plate 1 UNS LN_E10_E10_CD4p_Live.fcs	RYk17_aIL10_36_UNS	aIL10	RYk17	thirty_six	aIL10_thirty_six	UNS	E10
1297	Sample_5	1	212	0.166405	4.1789	4.3492	1.79612	Sample_5	AI_export_Plate 1 UNS LN_A2_A02_CD4p_Live.fcs	RYk17_aIL10_-1_UNS	aIL10	RYk17	minus_one	aIL10_minus_one	UNS	A02
1298	Sample_5	10	144	0.11303	15.4946	15.8156	1.89526	Sample_5	AI_export_Plate 1 UNS LN_A2_A02_CD4p_Live.fcs	RYk17_aIL10_-1_UNS	aIL10	RYk17	minus_one	aIL10_minus_one	UNS	A02
1299	Sample_5	11	3	0.00235479	27.433	27.557	0.214766	Sample_5	AI_export_Plate 1 UNS LN_A2_A02_CD4p_Live.fcs	RYk17_aIL10_-1_UNS	aIL10	RYk17	minus_one	aIL10_minus_one	UNS	A02
1300	Sample_5	12	3	0.00235479	9.61245	9.61245	6.95577e-09	Sample_5	AI_export_Plate 1 UNS LN_A2_A02_CD4p_Live.fcs	RYk17_aIL10_-1_UNS	aIL10	RYk17	minus_one	aIL10_minus_one	UNS	A02
1301	Sample_5	13	17	0.0133438	19.0435	17.5061	1.71125	Sample_5	AI_export_Plate 1 UNS LN_A2_A02_CD4p_Live.fcs	RYk17_aIL10_-1_UNS	aIL10	RYk17	minus_one	aIL10_minus_one	UNS	A02
1302	Sample_5	14	1	0.000784929	NA	NA	NA	Sample_5	AI_export_Plate 1 UNS LN_A2_A02_CD4p_Live.fcs	RYk17_aIL10_-1_UNS	aIL10	RYk17	minus_one	aIL10_minus_one	UNS	A02
1303	Sample_5	15	1	0.000784929	NA	NA	NA	Sample_5	AI_export_Plate 1 UNS LN_A2_A02_CD4p_Live.fcs	RYk17_aIL10_-1_UNS	aIL10	RYk17	minus_one	aIL10_minus_one	UNS	A02
1304	Sample_5	16	1	0.000784929	27.1936	27.1936	NA	Sample_5	AI_export_Plate 1 UNS LN_A2_A02_CD4p_Live.fcs	RYk17_aIL10_-1_UNS	aIL10	RYk17	minus_one	aIL10_minus_one	UNS	A02
1305	Sample_5	17	2	0.00156986	NA	NA	NA	Sample_5	AI_export_Plate 1 UNS LN_A2_A02_CD4p_Live.fcs	RYk17_aIL10_-1_UNS	aIL10	RYk17	minus_one	aIL10_minus_one	UNS	A02
1306	Sample_5	18	1	0.000784929	3.59451	3.59451	NA	Sample_5	AI_export_Plate 1 UNS LN_A2_A02_CD4p_Live.fcs	RYk17_aIL10_-1_UNS	aIL10	RYk17	minus_one	aIL10_minus_one	UNS	A02
1307	Sample_5	2	170	0.133438	4.12275	3.63957	1.56601	Sample_5	AI_export_Plate 1 UNS LN_A2_A02_CD4p_Live.fcs	RYk17_aIL10_-1_UNS	aIL10	RYk17	minus_one	aIL10_minus_one	UNS	A02
1308	Sample_5	3	172	0.135008	9.66318	9.81464	2.4188	Sample_5	AI_export_Plate 1 UNS LN_A2_A02_CD4p_Live.fcs	RYk17_aIL10_-1_UNS	aIL10	RYk17	minus_one	aIL10_minus_one	UNS	A02
1309	Sample_5	4	92	0.0722135	18.6853	18.5964	3.48836	Sample_5	AI_export_Plate 1 UNS LN_A2_A02_CD4p_Live.fcs	RYk17_aIL10_-1_UNS	aIL10	RYk17	minus_one	aIL10_minus_one	UNS	A02
1310	Sample_5	5	156	0.122449	22.859	22.7177	0.902712	Sample_5	AI_export_Plate 1 UNS LN_A2_A02_CD4p_Live.fcs	RYk17_aIL10_-1_UNS	aIL10	RYk17	minus_one	aIL10_minus_one	UNS	A02
1311	Sample_5	6	206	0.161695	5.35921	5.37953	1.61142	Sample_5	AI_export_Plate 1 UNS LN_A2_A02_CD4p_Live.fcs	RYk17_aIL10_-1_UNS	aIL10	RYk17	minus_one	aIL10_minus_one	UNS	A02
1312	Sample_5	7	58	0.0455259	19.2918	20.4236	3.41938	Sample_5	AI_export_Plate 1 UNS LN_A2_A02_CD4p_Live.fcs	RYk17_aIL10_-1_UNS	aIL10	RYk17	minus_one	aIL10_minus_one	UNS	A02
1313	Sample_5	8	22	0.0172684	25.747	25.8357	0.538914	Sample_5	AI_export_Plate 1 UNS LN_A2_A02_CD4p_Live.fcs	RYk17_aIL10_-1_UNS	aIL10	RYk17	minus_one	aIL10_minus_one	UNS	A02
1314	Sample_5	9	13	0.0102041	17.4288	23.5609	8.04173	Sample_5	AI_export_Plate 1 UNS LN_A2_A02_CD4p_Live.fcs	RYk17_aIL10_-1_UNS	aIL10	RYk17	minus_one	aIL10_minus_one	UNS	A02
1315	Sample_50	1	255	0.200157	3.29167	2.93419	2.71633	Sample_50	AI_export_Plate 1 UNS LN_E11_E11_CD4p_Live.fcs	RVz16_Control_36_UNS	Control	RVz16	thirty_six	Control_thirty_six	UNS	E11
1316	Sample_50	10	151	0.118524	14.535	14.6132	2.00822	Sample_50	AI_export_Plate 1 UNS LN_E11_E11_CD4p_Live.fcs	RVz16_Control_36_UNS	Control	RVz16	thirty_six	Control_thirty_six	UNS	E11
1317	Sample_50	11	7	0.00549451	27.281	27.3833	0.341828	Sample_50	AI_export_Plate 1 UNS LN_E11_E11_CD4p_Live.fcs	RVz16_Control_36_UNS	Control	RVz16	thirty_six	Control_thirty_six	UNS	E11
1318	Sample_50	12	5	0.00392465	8.67552	9.61061	1.36726	Sample_50	AI_export_Plate 1 UNS LN_E11_E11_CD4p_Live.fcs	RVz16_Control_36_UNS	Control	RVz16	thirty_six	Control_thirty_six	UNS	E11
1319	Sample_50	13	13	0.0102041	16.0236	17.4779	6.68608	Sample_50	AI_export_Plate 1 UNS LN_E11_E11_CD4p_Live.fcs	RVz16_Control_36_UNS	Control	RVz16	thirty_six	Control_thirty_six	UNS	E11
1320	Sample_50	14	2	0.00156986	27.342	27.342	4.91847e-09	Sample_50	AI_export_Plate 1 UNS LN_E11_E11_CD4p_Live.fcs	RVz16_Control_36_UNS	Control	RVz16	thirty_six	Control_thirty_six	UNS	E11
1321	Sample_50	15	3	0.00235479	NA	NA	NA	Sample_50	AI_export_Plate 1 UNS LN_E11_E11_CD4p_Live.fcs	RVz16_Control_36_UNS	Control	RVz16	thirty_six	Control_thirty_six	UNS	E11
1322	Sample_50	16	0	0	NA	NA	NA	Sample_50	AI_export_Plate 1 UNS LN_E11_E11_CD4p_Live.fcs	RVz16_Control_36_UNS	Control	RVz16	thirty_six	Control_thirty_six	UNS	E11
1323	Sample_50	17	0	0	NA	NA	NA	Sample_50	AI_export_Plate 1 UNS LN_E11_E11_CD4p_Live.fcs	RVz16_Control_36_UNS	Control	RVz16	thirty_six	Control_thirty_six	UNS	E11
1324	Sample_50	18	1	0.000784929	3.61058	3.61058	NA	Sample_50	AI_export_Plate 1 UNS LN_E11_E11_CD4p_Live.fcs	RVz16_Control_36_UNS	Control	RVz16	thirty_six	Control_thirty_six	UNS	E11
1325	Sample_50	2	246	0.193093	3.20117	3.05704	2.08477	Sample_50	AI_export_Plate 1 UNS LN_E11_E11_CD4p_Live.fcs	RVz16_Control_36_UNS	Control	RVz16	thirty_six	Control_thirty_six	UNS	E11
1326	Sample_50	3	201	0.157771	9.69346	9.84037	2.07095	Sample_50	AI_export_Plate 1 UNS LN_E11_E11_CD4p_Live.fcs	RVz16_Control_36_UNS	Control	RVz16	thirty_six	Control_thirty_six	UNS	E11
1327	Sample_50	4	140	0.10989	19.0544	19.6444	3.08326	Sample_50	AI_export_Plate 1 UNS LN_E11_E11_CD4p_Live.fcs	RVz16_Control_36_UNS	Control	RVz16	thirty_six	Control_thirty_six	UNS	E11
1328	Sample_50	5	56	0.043956	22.6228	22.9164	3.17277	Sample_50	AI_export_Plate 1 UNS LN_E11_E11_CD4p_Live.fcs	RVz16_Control_36_UNS	Control	RVz16	thirty_six	Control_thirty_six	UNS	E11
1329	Sample_50	6	106	0.0832025	5.56057	5.94335	1.51214	Sample_50	AI_export_Plate 1 UNS LN_E11_E11_CD4p_Live.fcs	RVz16_Control_36_UNS	Control	RVz16	thirty_six	Control_thirty_six	UNS	E11
1330	Sample_50	7	37	0.0290424	18.6452	18.1376	2.39589	Sample_50	AI_export_Plate 1 UNS LN_E11_E11_CD4p_Live.fcs	RVz16_Control_36_UNS	Control	RVz16	thirty_six	Control_thirty_six	UNS	E11
1331	Sample_50	8	14	0.010989	25.7458	26.1187	0.786941	Sample_50	AI_export_Plate 1 UNS LN_E11_E11_CD4p_Live.fcs	RVz16_Control_36_UNS	Control	RVz16	thirty_six	Control_thirty_six	UNS	E11
1332	Sample_50	9	37	0.0290424	18.1819	23.5609	7.63765	Sample_50	AI_export_Plate 1 UNS LN_E11_E11_CD4p_Live.fcs	RVz16_Control_36_UNS	Control	RVz16	thirty_six	Control_thirty_six	UNS	E11
1333	Sample_51	1	63	0.0494505	3.30039	3.23713	2.32669	Sample_51	AI_export_Plate 1 UNS LN_E12_E12_CD4p_Live.fcs	RYm17_aIL10+aPD1_36_UNS	aIL10+aPD1	RYm17	thirty_six	aIL10+aPD1_thirty_six	UNS	E12
1334	Sample_51	10	462	0.362637	14.8577	14.8565	1.67439	Sample_51	AI_export_Plate 1 UNS LN_E12_E12_CD4p_Live.fcs	RYm17_aIL10+aPD1_36_UNS	aIL10+aPD1	RYm17	thirty_six	aIL10+aPD1_thirty_six	UNS	E12
1335	Sample_51	11	24	0.0188383	27.4702	27.557	0.151099	Sample_51	AI_export_Plate 1 UNS LN_E12_E12_CD4p_Live.fcs	RYm17_aIL10+aPD1_36_UNS	aIL10+aPD1	RYm17	thirty_six	aIL10+aPD1_thirty_six	UNS	E12
1336	Sample_51	12	3	0.00235479	9.3711	9.47052	0.303527	Sample_51	AI_export_Plate 1 UNS LN_E12_E12_CD4p_Live.fcs	RYm17_aIL10+aPD1_36_UNS	aIL10+aPD1	RYm17	thirty_six	aIL10+aPD1_thirty_six	UNS	E12
1337	Sample_51	13	26	0.0204082	18.4813	17.4779	2.0312	Sample_51	AI_export_Plate 1 UNS LN_E12_E12_CD4p_Live.fcs	RYm17_aIL10+aPD1_36_UNS	aIL10+aPD1	RYm17	thirty_six	aIL10+aPD1_thirty_six	UNS	E12
1338	Sample_51	14	0	0	NA	NA	NA	Sample_51	AI_export_Plate 1 UNS LN_E12_E12_CD4p_Live.fcs	RYm17_aIL10+aPD1_36_UNS	aIL10+aPD1	RYm17	thirty_six	aIL10+aPD1_thirty_six	UNS	E12
1339	Sample_51	15	0	0	NA	NA	NA	Sample_51	AI_export_Plate 1 UNS LN_E12_E12_CD4p_Live.fcs	RYm17_aIL10+aPD1_36_UNS	aIL10+aPD1	RYm17	thirty_six	aIL10+aPD1_thirty_six	UNS	E12
1340	Sample_51	16	0	0	NA	NA	NA	Sample_51	AI_export_Plate 1 UNS LN_E12_E12_CD4p_Live.fcs	RYm17_aIL10+aPD1_36_UNS	aIL10+aPD1	RYm17	thirty_six	aIL10+aPD1_thirty_six	UNS	E12
1341	Sample_51	17	0	0	NA	NA	NA	Sample_51	AI_export_Plate 1 UNS LN_E12_E12_CD4p_Live.fcs	RYm17_aIL10+aPD1_36_UNS	aIL10+aPD1	RYm17	thirty_six	aIL10+aPD1_thirty_six	UNS	E12
1342	Sample_51	18	1	0.000784929	NA	NA	NA	Sample_51	AI_export_Plate 1 UNS LN_E12_E12_CD4p_Live.fcs	RYm17_aIL10+aPD1_36_UNS	aIL10+aPD1	RYm17	thirty_six	aIL10+aPD1_thirty_six	UNS	E12
1343	Sample_51	2	140	0.10989	3.69596	3.33374	2.27425	Sample_51	AI_export_Plate 1 UNS LN_E12_E12_CD4p_Live.fcs	RYm17_aIL10+aPD1_36_UNS	aIL10+aPD1	RYm17	thirty_six	aIL10+aPD1_thirty_six	UNS	E12
1344	Sample_51	3	251	0.197017	10.159	10.1722	2.18217	Sample_51	AI_export_Plate 1 UNS LN_E12_E12_CD4p_Live.fcs	RYm17_aIL10+aPD1_36_UNS	aIL10+aPD1	RYm17	thirty_six	aIL10+aPD1_thirty_six	UNS	E12
1345	Sample_51	4	118	0.0926217	18.089	17.6302	3.08023	Sample_51	AI_export_Plate 1 UNS LN_E12_E12_CD4p_Live.fcs	RYm17_aIL10+aPD1_36_UNS	aIL10+aPD1	RYm17	thirty_six	aIL10+aPD1_thirty_six	UNS	E12
1346	Sample_51	5	110	0.0863422	22.7069	22.7177	1.75897	Sample_51	AI_export_Plate 1 UNS LN_E12_E12_CD4p_Live.fcs	RYm17_aIL10+aPD1_36_UNS	aIL10+aPD1	RYm17	thirty_six	aIL10+aPD1_thirty_six	UNS	E12
1347	Sample_51	6	21	0.0164835	5.22268	5.64731	1.99073	Sample_51	AI_export_Plate 1 UNS LN_E12_E12_CD4p_Live.fcs	RYm17_aIL10+aPD1_36_UNS	aIL10+aPD1	RYm17	thirty_six	aIL10+aPD1_thirty_six	UNS	E12
1348	Sample_51	7	36	0.0282575	18.9167	17.9802	1.59155	Sample_51	AI_export_Plate 1 UNS LN_E12_E12_CD4p_Live.fcs	RYm17_aIL10+aPD1_36_UNS	aIL10+aPD1	RYm17	thirty_six	aIL10+aPD1_thirty_six	UNS	E12
1349	Sample_51	8	8	0.00627943	25.5245	25.6414	0.656378	Sample_51	AI_export_Plate 1 UNS LN_E12_E12_CD4p_Live.fcs	RYm17_aIL10+aPD1_36_UNS	aIL10+aPD1	RYm17	thirty_six	aIL10+aPD1_thirty_six	UNS	E12
1350	Sample_51	9	11	0.00863422	19.9464	23.5609	6.57346	Sample_51	AI_export_Plate 1 UNS LN_E12_E12_CD4p_Live.fcs	RYm17_aIL10+aPD1_36_UNS	aIL10+aPD1	RYm17	thirty_six	aIL10+aPD1_thirty_six	UNS	E12
1351	Sample_52	1	223	0.175039	4.00213	4.00002	2.28396	Sample_52	AI_export_Plate 1 UNS LN_E2_E02_CD4p_Live.fcs	34897_aIL10_21_UNS	aIL10	34897	twenty_one	aIL10_twenty_one	UNS	E02
1352	Sample_52	10	160	0.125589	14.8349	14.6072	1.48542	Sample_52	AI_export_Plate 1 UNS LN_E2_E02_CD4p_Live.fcs	34897_aIL10_21_UNS	aIL10	34897	twenty_one	aIL10_twenty_one	UNS	E02
1353	Sample_52	11	20	0.0156986	27.3905	27.557	0.392048	Sample_52	AI_export_Plate 1 UNS LN_E2_E02_CD4p_Live.fcs	34897_aIL10_21_UNS	aIL10	34897	twenty_one	aIL10_twenty_one	UNS	E02
1354	Sample_52	12	11	0.00863422	9.19326	9.61244	0.809746	Sample_52	AI_export_Plate 1 UNS LN_E2_E02_CD4p_Live.fcs	34897_aIL10_21_UNS	aIL10	34897	twenty_one	aIL10_twenty_one	UNS	E02
1355	Sample_52	13	13	0.0102041	17.8729	17.4779	2.32553	Sample_52	AI_export_Plate 1 UNS LN_E2_E02_CD4p_Live.fcs	34897_aIL10_21_UNS	aIL10	34897	twenty_one	aIL10_twenty_one	UNS	E02
1356	Sample_52	14	3	0.00235479	27.342	27.342	6.95577e-09	Sample_52	AI_export_Plate 1 UNS LN_E2_E02_CD4p_Live.fcs	34897_aIL10_21_UNS	aIL10	34897	twenty_one	aIL10_twenty_one	UNS	E02
1357	Sample_52	15	0	0	NA	NA	NA	Sample_52	AI_export_Plate 1 UNS LN_E2_E02_CD4p_Live.fcs	34897_aIL10_21_UNS	aIL10	34897	twenty_one	aIL10_twenty_one	UNS	E02
1358	Sample_52	16	0	0	NA	NA	NA	Sample_52	AI_export_Plate 1 UNS LN_E2_E02_CD4p_Live.fcs	34897_aIL10_21_UNS	aIL10	34897	twenty_one	aIL10_twenty_one	UNS	E02
1359	Sample_52	17	2	0.00156986	NA	NA	NA	Sample_52	AI_export_Plate 1 UNS LN_E2_E02_CD4p_Live.fcs	34897_aIL10_21_UNS	aIL10	34897	twenty_one	aIL10_twenty_one	UNS	E02
1360	Sample_52	18	0	0	NA	NA	NA	Sample_52	AI_export_Plate 1 UNS LN_E2_E02_CD4p_Live.fcs	34897_aIL10_21_UNS	aIL10	34897	twenty_one	aIL10_twenty_one	UNS	E02
1361	Sample_52	2	182	0.142857	3.63053	3.2497	1.88633	Sample_52	AI_export_Plate 1 UNS LN_E2_E02_CD4p_Live.fcs	34897_aIL10_21_UNS	aIL10	34897	twenty_one	aIL10_twenty_one	UNS	E02
1362	Sample_52	3	197	0.154631	9.44212	9.68916	2.14898	Sample_52	AI_export_Plate 1 UNS LN_E2_E02_CD4p_Live.fcs	34897_aIL10_21_UNS	aIL10	34897	twenty_one	aIL10_twenty_one	UNS	E02
1363	Sample_52	4	83	0.0651491	18.1577	18.5748	3.77688	Sample_52	AI_export_Plate 1 UNS LN_E2_E02_CD4p_Live.fcs	34897_aIL10_21_UNS	aIL10	34897	twenty_one	aIL10_twenty_one	UNS	E02
1364	Sample_52	5	77	0.0604396	22.4351	22.7177	2.57528	Sample_52	AI_export_Plate 1 UNS LN_E2_E02_CD4p_Live.fcs	34897_aIL10_21_UNS	aIL10	34897	twenty_one	aIL10_twenty_one	UNS	E02
1365	Sample_52	6	202	0.158556	5.83907	5.74682	1.97941	Sample_52	AI_export_Plate 1 UNS LN_E2_E02_CD4p_Live.fcs	34897_aIL10_21_UNS	aIL10	34897	twenty_one	aIL10_twenty_one	UNS	E02
1366	Sample_52	7	47	0.0368917	18.8802	20.0893	3.72289	Sample_52	AI_export_Plate 1 UNS LN_E2_E02_CD4p_Live.fcs	34897_aIL10_21_UNS	aIL10	34897	twenty_one	aIL10_twenty_one	UNS	E02
1367	Sample_52	8	19	0.0149137	25.5829	25.8357	1.02315	Sample_52	AI_export_Plate 1 UNS LN_E2_E02_CD4p_Live.fcs	34897_aIL10_21_UNS	aIL10	34897	twenty_one	aIL10_twenty_one	UNS	E02
1368	Sample_52	9	35	0.0274725	20.6781	23.5609	6.28173	Sample_52	AI_export_Plate 1 UNS LN_E2_E02_CD4p_Live.fcs	34897_aIL10_21_UNS	aIL10	34897	twenty_one	aIL10_twenty_one	UNS	E02
1369	Sample_53	1	315	0.247253	4.2773	4.74389	2.46764	Sample_53	AI_export_Plate 1 UNS LN_E3_E03_CD4p_Live.fcs	RRh17_aIL10+aPD1_21_UNS	aIL10+aPD1	RRh17	twenty_one	aIL10+aPD1_twenty_one	UNS	E03
1370	Sample_53	10	110	0.0863422	14.4939	14.4958	2.41176	Sample_53	AI_export_Plate 1 UNS LN_E3_E03_CD4p_Live.fcs	RRh17_aIL10+aPD1_21_UNS	aIL10+aPD1	RRh17	twenty_one	aIL10+aPD1_twenty_one	UNS	E03
1371	Sample_53	11	24	0.0188383	27.4808	27.557	0.267328	Sample_53	AI_export_Plate 1 UNS LN_E3_E03_CD4p_Live.fcs	RRh17_aIL10+aPD1_21_UNS	aIL10+aPD1	RRh17	twenty_one	aIL10+aPD1_twenty_one	UNS	E03
1372	Sample_53	12	4	0.00313972	12.0218	9.29049	6.58922	Sample_53	AI_export_Plate 1 UNS LN_E3_E03_CD4p_Live.fcs	RRh17_aIL10+aPD1_21_UNS	aIL10+aPD1	RRh17	twenty_one	aIL10+aPD1_twenty_one	UNS	E03
1373	Sample_53	13	16	0.0125589	16.6794	17.4779	4.83387	Sample_53	AI_export_Plate 1 UNS LN_E3_E03_CD4p_Live.fcs	RRh17_aIL10+aPD1_21_UNS	aIL10+aPD1	RRh17	twenty_one	aIL10+aPD1_twenty_one	UNS	E03
1374	Sample_53	14	1	0.000784929	27.342	27.342	NA	Sample_53	AI_export_Plate 1 UNS LN_E3_E03_CD4p_Live.fcs	RRh17_aIL10+aPD1_21_UNS	aIL10+aPD1	RRh17	twenty_one	aIL10+aPD1_twenty_one	UNS	E03
1375	Sample_53	15	0	0	NA	NA	NA	Sample_53	AI_export_Plate 1 UNS LN_E3_E03_CD4p_Live.fcs	RRh17_aIL10+aPD1_21_UNS	aIL10+aPD1	RRh17	twenty_one	aIL10+aPD1_twenty_one	UNS	E03
1376	Sample_53	16	0	0	NA	NA	NA	Sample_53	AI_export_Plate 1 UNS LN_E3_E03_CD4p_Live.fcs	RRh17_aIL10+aPD1_21_UNS	aIL10+aPD1	RRh17	twenty_one	aIL10+aPD1_twenty_one	UNS	E03
1377	Sample_53	17	1	0.000784929	NA	NA	NA	Sample_53	AI_export_Plate 1 UNS LN_E3_E03_CD4p_Live.fcs	RRh17_aIL10+aPD1_21_UNS	aIL10+aPD1	RRh17	twenty_one	aIL10+aPD1_twenty_one	UNS	E03
1378	Sample_53	18	1	0.000784929	3.57224	3.57224	NA	Sample_53	AI_export_Plate 1 UNS LN_E3_E03_CD4p_Live.fcs	RRh17_aIL10+aPD1_21_UNS	aIL10+aPD1	RRh17	twenty_one	aIL10+aPD1_twenty_one	UNS	E03
1379	Sample_53	2	162	0.127159	3.81401	3.53706	2.74618	Sample_53	AI_export_Plate 1 UNS LN_E3_E03_CD4p_Live.fcs	RRh17_aIL10+aPD1_21_UNS	aIL10+aPD1	RRh17	twenty_one	aIL10+aPD1_twenty_one	UNS	E03
1380	Sample_53	3	204	0.160126	9.61139	9.39918	2.41639	Sample_53	AI_export_Plate 1 UNS LN_E3_E03_CD4p_Live.fcs	RRh17_aIL10+aPD1_21_UNS	aIL10+aPD1	RRh17	twenty_one	aIL10+aPD1_twenty_one	UNS	E03
1381	Sample_53	4	95	0.0745683	18.672	19.2912	3.07814	Sample_53	AI_export_Plate 1 UNS LN_E3_E03_CD4p_Live.fcs	RRh17_aIL10+aPD1_21_UNS	aIL10+aPD1	RRh17	twenty_one	aIL10+aPD1_twenty_one	UNS	E03
1382	Sample_53	5	63	0.0494505	22.0589	22.8768	3.85434	Sample_53	AI_export_Plate 1 UNS LN_E3_E03_CD4p_Live.fcs	RRh17_aIL10+aPD1_21_UNS	aIL10+aPD1	RRh17	twenty_one	aIL10+aPD1_twenty_one	UNS	E03
1383	Sample_53	6	239	0.187598	5.89761	6.08432	2.06698	Sample_53	AI_export_Plate 1 UNS LN_E3_E03_CD4p_Live.fcs	RRh17_aIL10+aPD1_21_UNS	aIL10+aPD1	RRh17	twenty_one	aIL10+aPD1_twenty_one	UNS	E03
1384	Sample_53	7	20	0.0156986	17.5472	17.7508	2.6917	Sample_53	AI_export_Plate 1 UNS LN_E3_E03_CD4p_Live.fcs	RRh17_aIL10+aPD1_21_UNS	aIL10+aPD1	RRh17	twenty_one	aIL10+aPD1_twenty_one	UNS	E03
1385	Sample_53	8	14	0.010989	24.3912	25.7415	4.28843	Sample_53	AI_export_Plate 1 UNS LN_E3_E03_CD4p_Live.fcs	RRh17_aIL10+aPD1_21_UNS	aIL10+aPD1	RRh17	twenty_one	aIL10+aPD1_twenty_one	UNS	E03
1386	Sample_53	9	5	0.00392465	13.5474	7.38523	9.15044	Sample_53	AI_export_Plate 1 UNS LN_E3_E03_CD4p_Live.fcs	RRh17_aIL10+aPD1_21_UNS	aIL10+aPD1	RRh17	twenty_one	aIL10+aPD1_twenty_one	UNS	E03
1387	Sample_54	1	270	0.211931	3.90643	3.71364	3.24772	Sample_54	AI_export_Plate 1 UNS LN_E4_E04_CD4p_Live.fcs	RFn17_aIL10_21_UNS	aIL10	RFn17	twenty_one	aIL10_twenty_one	UNS	E04
1388	Sample_54	10	128	0.100471	14.4857	14.6009	2.14229	Sample_54	AI_export_Plate 1 UNS LN_E4_E04_CD4p_Live.fcs	RFn17_aIL10_21_UNS	aIL10	RFn17	twenty_one	aIL10_twenty_one	UNS	E04
1389	Sample_54	11	8	0.00627943	27.057	27.557	0.635186	Sample_54	AI_export_Plate 1 UNS LN_E4_E04_CD4p_Live.fcs	RFn17_aIL10_21_UNS	aIL10	RFn17	twenty_one	aIL10_twenty_one	UNS	E04
1390	Sample_54	12	9	0.00706436	9.23347	9.46905	0.575402	Sample_54	AI_export_Plate 1 UNS LN_E4_E04_CD4p_Live.fcs	RFn17_aIL10_21_UNS	aIL10	RFn17	twenty_one	aIL10_twenty_one	UNS	E04
1391	Sample_54	13	20	0.0156986	19.3622	17.4779	2.804	Sample_54	AI_export_Plate 1 UNS LN_E4_E04_CD4p_Live.fcs	RFn17_aIL10_21_UNS	aIL10	RFn17	twenty_one	aIL10_twenty_one	UNS	E04
1392	Sample_54	14	3	0.00235479	27.342	27.342	6.95577e-09	Sample_54	AI_export_Plate 1 UNS LN_E4_E04_CD4p_Live.fcs	RFn17_aIL10_21_UNS	aIL10	RFn17	twenty_one	aIL10_twenty_one	UNS	E04
1393	Sample_54	15	2	0.00156986	NA	NA	NA	Sample_54	AI_export_Plate 1 UNS LN_E4_E04_CD4p_Live.fcs	RFn17_aIL10_21_UNS	aIL10	RFn17	twenty_one	aIL10_twenty_one	UNS	E04
1394	Sample_54	16	4	0.00313972	27.0024	27.0055	0.303568	Sample_54	AI_export_Plate 1 UNS LN_E4_E04_CD4p_Live.fcs	RFn17_aIL10_21_UNS	aIL10	RFn17	twenty_one	aIL10_twenty_one	UNS	E04
1395	Sample_54	17	0	0	NA	NA	NA	Sample_54	AI_export_Plate 1 UNS LN_E4_E04_CD4p_Live.fcs	RFn17_aIL10_21_UNS	aIL10	RFn17	twenty_one	aIL10_twenty_one	UNS	E04
1396	Sample_54	18	0	0	NA	NA	NA	Sample_54	AI_export_Plate 1 UNS LN_E4_E04_CD4p_Live.fcs	RFn17_aIL10_21_UNS	aIL10	RFn17	twenty_one	aIL10_twenty_one	UNS	E04
1397	Sample_54	2	170	0.133438	3.17282	3.11893	1.55826	Sample_54	AI_export_Plate 1 UNS LN_E4_E04_CD4p_Live.fcs	RFn17_aIL10_21_UNS	aIL10	RFn17	twenty_one	aIL10_twenty_one	UNS	E04
1398	Sample_54	3	240	0.188383	9.59347	9.69176	2.27657	Sample_54	AI_export_Plate 1 UNS LN_E4_E04_CD4p_Live.fcs	RFn17_aIL10_21_UNS	aIL10	RFn17	twenty_one	aIL10_twenty_one	UNS	E04
1399	Sample_54	4	128	0.100471	18.985	19.3091	3.309	Sample_54	AI_export_Plate 1 UNS LN_E4_E04_CD4p_Live.fcs	RFn17_aIL10_21_UNS	aIL10	RFn17	twenty_one	aIL10_twenty_one	UNS	E04
1400	Sample_54	5	97	0.0761381	22.6566	23.123	2.69463	Sample_54	AI_export_Plate 1 UNS LN_E4_E04_CD4p_Live.fcs	RFn17_aIL10_21_UNS	aIL10	RFn17	twenty_one	aIL10_twenty_one	UNS	E04
1401	Sample_54	6	113	0.088697	5.80654	5.9321	1.37177	Sample_54	AI_export_Plate 1 UNS LN_E4_E04_CD4p_Live.fcs	RFn17_aIL10_21_UNS	aIL10	RFn17	twenty_one	aIL10_twenty_one	UNS	E04
1402	Sample_54	7	27	0.0211931	19.4331	20.4193	3.28306	Sample_54	AI_export_Plate 1 UNS LN_E4_E04_CD4p_Live.fcs	RFn17_aIL10_21_UNS	aIL10	RFn17	twenty_one	aIL10_twenty_one	UNS	E04
1403	Sample_54	8	43	0.033752	25.5503	25.5048	0.485858	Sample_54	AI_export_Plate 1 UNS LN_E4_E04_CD4p_Live.fcs	RFn17_aIL10_21_UNS	aIL10	RFn17	twenty_one	aIL10_twenty_one	UNS	E04
1404	Sample_54	9	12	0.00941915	20.6905	23.5609	6.23007	Sample_54	AI_export_Plate 1 UNS LN_E4_E04_CD4p_Live.fcs	RFn17_aIL10_21_UNS	aIL10	RFn17	twenty_one	aIL10_twenty_one	UNS	E04
1405	Sample_55	1	253	0.198587	3.75691	3.8233	2.42837	Sample_55	AI_export_Plate 1 UNS LN_E5_E05_CD4p_Live.fcs	RVm17_aIL10_21_UNS	aIL10	RVm17	twenty_one	aIL10_twenty_one	UNS	E05
1406	Sample_55	10	129	0.101256	15.266	15.538	1.38533	Sample_55	AI_export_Plate 1 UNS LN_E5_E05_CD4p_Live.fcs	RVm17_aIL10_21_UNS	aIL10	RVm17	twenty_one	aIL10_twenty_one	UNS	E05
1407	Sample_55	11	23	0.0180534	27.4348	27.557	0.307919	Sample_55	AI_export_Plate 1 UNS LN_E5_E05_CD4p_Live.fcs	RVm17_aIL10_21_UNS	aIL10	RVm17	twenty_one	aIL10_twenty_one	UNS	E05
1408	Sample_55	12	7	0.00549451	9.25139	9.61244	0.70622	Sample_55	AI_export_Plate 1 UNS LN_E5_E05_CD4p_Live.fcs	RVm17_aIL10_21_UNS	aIL10	RVm17	twenty_one	aIL10_twenty_one	UNS	E05
1409	Sample_55	13	20	0.0156986	17.7416	17.4779	3.24859	Sample_55	AI_export_Plate 1 UNS LN_E5_E05_CD4p_Live.fcs	RVm17_aIL10_21_UNS	aIL10	RVm17	twenty_one	aIL10_twenty_one	UNS	E05
1410	Sample_55	14	0	0	NA	NA	NA	Sample_55	AI_export_Plate 1 UNS LN_E5_E05_CD4p_Live.fcs	RVm17_aIL10_21_UNS	aIL10	RVm17	twenty_one	aIL10_twenty_one	UNS	E05
1411	Sample_55	15	1	0.000784929	NA	NA	NA	Sample_55	AI_export_Plate 1 UNS LN_E5_E05_CD4p_Live.fcs	RVm17_aIL10_21_UNS	aIL10	RVm17	twenty_one	aIL10_twenty_one	UNS	E05
1412	Sample_55	16	5	0.00392465	26.9695	27.0432	0.28155	Sample_55	AI_export_Plate 1 UNS LN_E5_E05_CD4p_Live.fcs	RVm17_aIL10_21_UNS	aIL10	RVm17	twenty_one	aIL10_twenty_one	UNS	E05
1413	Sample_55	17	0	0	NA	NA	NA	Sample_55	AI_export_Plate 1 UNS LN_E5_E05_CD4p_Live.fcs	RVm17_aIL10_21_UNS	aIL10	RVm17	twenty_one	aIL10_twenty_one	UNS	E05
1414	Sample_55	18	3	0.00235479	6.91124	6.91124	5.46666	Sample_55	AI_export_Plate 1 UNS LN_E5_E05_CD4p_Live.fcs	RVm17_aIL10_21_UNS	aIL10	RVm17	twenty_one	aIL10_twenty_one	UNS	E05
1415	Sample_55	2	146	0.1146	3.85835	3.36071	2.47138	Sample_55	AI_export_Plate 1 UNS LN_E5_E05_CD4p_Live.fcs	RVm17_aIL10_21_UNS	aIL10	RVm17	twenty_one	aIL10_twenty_one	UNS	E05
1416	Sample_55	3	248	0.194662	9.93341	10.0168	2.28652	Sample_55	AI_export_Plate 1 UNS LN_E5_E05_CD4p_Live.fcs	RVm17_aIL10_21_UNS	aIL10	RVm17	twenty_one	aIL10_twenty_one	UNS	E05
1417	Sample_55	4	93	0.0729984	18.8555	18.9201	2.92167	Sample_55	AI_export_Plate 1 UNS LN_E5_E05_CD4p_Live.fcs	RVm17_aIL10_21_UNS	aIL10	RVm17	twenty_one	aIL10_twenty_one	UNS	E05
1418	Sample_55	5	121	0.0949765	23.0007	23.1356	1.09318	Sample_55	AI_export_Plate 1 UNS LN_E5_E05_CD4p_Live.fcs	RVm17_aIL10_21_UNS	aIL10	RVm17	twenty_one	aIL10_twenty_one	UNS	E05
1419	Sample_55	6	131	0.102826	5.79956	5.85705	1.81053	Sample_55	AI_export_Plate 1 UNS LN_E5_E05_CD4p_Live.fcs	RVm17_aIL10_21_UNS	aIL10	RVm17	twenty_one	aIL10_twenty_one	UNS	E05
1420	Sample_55	7	39	0.0306122	18.9033	20.3076	3.49547	Sample_55	AI_export_Plate 1 UNS LN_E5_E05_CD4p_Live.fcs	RVm17_aIL10_21_UNS	aIL10	RVm17	twenty_one	aIL10_twenty_one	UNS	E05
1421	Sample_55	8	39	0.0306122	25.889	26.0464	0.50516	Sample_55	AI_export_Plate 1 UNS LN_E5_E05_CD4p_Live.fcs	RVm17_aIL10_21_UNS	aIL10	RVm17	twenty_one	aIL10_twenty_one	UNS	E05
1422	Sample_55	9	16	0.0125589	18.5328	23.5609	7.67055	Sample_55	AI_export_Plate 1 UNS LN_E5_E05_CD4p_Live.fcs	RVm17_aIL10_21_UNS	aIL10	RVm17	twenty_one	aIL10_twenty_one	UNS	E05
1423	Sample_56	1	238	0.186813	3.56634	3.2337	3.16837	Sample_56	AI_export_Plate 1 UNS LN_E6_E06_CD4p_Live.fcs	RBe17_Control_21_UNS	Control	RBe17	twenty_one	Control_twenty_one	UNS	E06
1424	Sample_56	10	145	0.113815	14.9736	15.1243	1.66391	Sample_56	AI_export_Plate 1 UNS LN_E6_E06_CD4p_Live.fcs	RBe17_Control_21_UNS	Control	RBe17	twenty_one	Control_twenty_one	UNS	E06
1425	Sample_56	11	17	0.0133438	27.2817	27.5341	0.426148	Sample_56	AI_export_Plate 1 UNS LN_E6_E06_CD4p_Live.fcs	RBe17_Control_21_UNS	Control	RBe17	twenty_one	Control_twenty_one	UNS	E06
1426	Sample_56	12	14	0.010989	9.84083	9.61244	2.24562	Sample_56	AI_export_Plate 1 UNS LN_E6_E06_CD4p_Live.fcs	RBe17_Control_21_UNS	Control	RBe17	twenty_one	Control_twenty_one	UNS	E06
1427	Sample_56	13	18	0.0141287	18.3515	17.4779	2.59784	Sample_56	AI_export_Plate 1 UNS LN_E6_E06_CD4p_Live.fcs	RBe17_Control_21_UNS	Control	RBe17	twenty_one	Control_twenty_one	UNS	E06
1428	Sample_56	14	0	0	NA	NA	NA	Sample_56	AI_export_Plate 1 UNS LN_E6_E06_CD4p_Live.fcs	RBe17_Control_21_UNS	Control	RBe17	twenty_one	Control_twenty_one	UNS	E06
1429	Sample_56	15	0	0	NA	NA	NA	Sample_56	AI_export_Plate 1 UNS LN_E6_E06_CD4p_Live.fcs	RBe17_Control_21_UNS	Control	RBe17	twenty_one	Control_twenty_one	UNS	E06
1430	Sample_56	16	3	0.00235479	27.2595	27.2595	0.0861197	Sample_56	AI_export_Plate 1 UNS LN_E6_E06_CD4p_Live.fcs	RBe17_Control_21_UNS	Control	RBe17	twenty_one	Control_twenty_one	UNS	E06
1431	Sample_56	17	1	0.000784929	NA	NA	NA	Sample_56	AI_export_Plate 1 UNS LN_E6_E06_CD4p_Live.fcs	RBe17_Control_21_UNS	Control	RBe17	twenty_one	Control_twenty_one	UNS	E06
1432	Sample_56	18	0	0	NA	NA	NA	Sample_56	AI_export_Plate 1 UNS LN_E6_E06_CD4p_Live.fcs	RBe17_Control_21_UNS	Control	RBe17	twenty_one	Control_twenty_one	UNS	E06
1433	Sample_56	2	161	0.126374	3.58074	3.3013	2.08308	Sample_56	AI_export_Plate 1 UNS LN_E6_E06_CD4p_Live.fcs	RBe17_Control_21_UNS	Control	RBe17	twenty_one	Control_twenty_one	UNS	E06
1434	Sample_56	3	220	0.172684	9.92813	9.89296	2.35957	Sample_56	AI_export_Plate 1 UNS LN_E6_E06_CD4p_Live.fcs	RBe17_Control_21_UNS	Control	RBe17	twenty_one	Control_twenty_one	UNS	E06
1435	Sample_56	4	134	0.105181	18.6578	19.0288	3.71365	Sample_56	AI_export_Plate 1 UNS LN_E6_E06_CD4p_Live.fcs	RBe17_Control_21_UNS	Control	RBe17	twenty_one	Control_twenty_one	UNS	E06
1436	Sample_56	5	97	0.0761381	22.9598	22.9148	1.32032	Sample_56	AI_export_Plate 1 UNS LN_E6_E06_CD4p_Live.fcs	RBe17_Control_21_UNS	Control	RBe17	twenty_one	Control_twenty_one	UNS	E06
1437	Sample_56	6	110	0.0863422	6.09353	6.07112	2.43126	Sample_56	AI_export_Plate 1 UNS LN_E6_E06_CD4p_Live.fcs	RBe17_Control_21_UNS	Control	RBe17	twenty_one	Control_twenty_one	UNS	E06
1438	Sample_56	7	38	0.0298273	18.7926	20.1966	3.677	Sample_56	AI_export_Plate 1 UNS LN_E6_E06_CD4p_Live.fcs	RBe17_Control_21_UNS	Control	RBe17	twenty_one	Control_twenty_one	UNS	E06
1439	Sample_56	8	64	0.0502355	25.3934	25.3759	0.509763	Sample_56	AI_export_Plate 1 UNS LN_E6_E06_CD4p_Live.fcs	RBe17_Control_21_UNS	Control	RBe17	twenty_one	Control_twenty_one	UNS	E06
1440	Sample_56	9	14	0.010989	19.3319	23.5609	6.90868	Sample_56	AI_export_Plate 1 UNS LN_E6_E06_CD4p_Live.fcs	RBe17_Control_21_UNS	Control	RBe17	twenty_one	Control_twenty_one	UNS	E06
1441	Sample_57	1	416	0.326531	3.09383	2.53668	2.60194	Sample_57	AI_export_Plate 1 UNS LN_E7_E07_CD4p_Live.fcs	RMl17_Control_21_UNS	Control	RMl17	twenty_one	Control_twenty_one	UNS	E07
1442	Sample_57	10	99	0.077708	14.9444	14.7568	2.01451	Sample_57	AI_export_Plate 1 UNS LN_E7_E07_CD4p_Live.fcs	RMl17_Control_21_UNS	Control	RMl17	twenty_one	Control_twenty_one	UNS	E07
1443	Sample_57	11	11	0.00863422	27.3868	27.557	0.34302	Sample_57	AI_export_Plate 1 UNS LN_E7_E07_CD4p_Live.fcs	RMl17_Control_21_UNS	Control	RMl17	twenty_one	Control_twenty_one	UNS	E07
1444	Sample_57	12	12	0.00941915	8.9059	9.56723	1.40548	Sample_57	AI_export_Plate 1 UNS LN_E7_E07_CD4p_Live.fcs	RMl17_Control_21_UNS	Control	RMl17	twenty_one	Control_twenty_one	UNS	E07
1445	Sample_57	13	10	0.00784929	18.1226	17.4779	1.36795	Sample_57	AI_export_Plate 1 UNS LN_E7_E07_CD4p_Live.fcs	RMl17_Control_21_UNS	Control	RMl17	twenty_one	Control_twenty_one	UNS	E07
1446	Sample_57	14	0	0	NA	NA	NA	Sample_57	AI_export_Plate 1 UNS LN_E7_E07_CD4p_Live.fcs	RMl17_Control_21_UNS	Control	RMl17	twenty_one	Control_twenty_one	UNS	E07
1447	Sample_57	15	0	0	NA	NA	NA	Sample_57	AI_export_Plate 1 UNS LN_E7_E07_CD4p_Live.fcs	RMl17_Control_21_UNS	Control	RMl17	twenty_one	Control_twenty_one	UNS	E07
1448	Sample_57	16	1	0.000784929	26.7275	26.7275	NA	Sample_57	AI_export_Plate 1 UNS LN_E7_E07_CD4p_Live.fcs	RMl17_Control_21_UNS	Control	RMl17	twenty_one	Control_twenty_one	UNS	E07
1449	Sample_57	17	0	0	NA	NA	NA	Sample_57	AI_export_Plate 1 UNS LN_E7_E07_CD4p_Live.fcs	RMl17_Control_21_UNS	Control	RMl17	twenty_one	Control_twenty_one	UNS	E07
1450	Sample_57	18	1	0.000784929	3.60795	3.60795	NA	Sample_57	AI_export_Plate 1 UNS LN_E7_E07_CD4p_Live.fcs	RMl17_Control_21_UNS	Control	RMl17	twenty_one	Control_twenty_one	UNS	E07
1451	Sample_57	2	176	0.138148	2.95362	2.78681	2.19552	Sample_57	AI_export_Plate 1 UNS LN_E7_E07_CD4p_Live.fcs	RMl17_Control_21_UNS	Control	RMl17	twenty_one	Control_twenty_one	UNS	E07
1452	Sample_57	3	135	0.105965	9.91043	9.80211	2.23041	Sample_57	AI_export_Plate 1 UNS LN_E7_E07_CD4p_Live.fcs	RMl17_Control_21_UNS	Control	RMl17	twenty_one	Control_twenty_one	UNS	E07
1453	Sample_57	4	110	0.0863422	18.9045	18.8622	2.97284	Sample_57	AI_export_Plate 1 UNS LN_E7_E07_CD4p_Live.fcs	RMl17_Control_21_UNS	Control	RMl17	twenty_one	Control_twenty_one	UNS	E07
1454	Sample_57	5	68	0.0533752	23.0932	22.8808	0.833277	Sample_57	AI_export_Plate 1 UNS LN_E7_E07_CD4p_Live.fcs	RMl17_Control_21_UNS	Control	RMl17	twenty_one	Control_twenty_one	UNS	E07
1455	Sample_57	6	140	0.10989	6.26789	6.2704	2.19075	Sample_57	AI_export_Plate 1 UNS LN_E7_E07_CD4p_Live.fcs	RMl17_Control_21_UNS	Control	RMl17	twenty_one	Control_twenty_one	UNS	E07
1456	Sample_57	7	42	0.032967	18.6207	20.1249	3.6899	Sample_57	AI_export_Plate 1 UNS LN_E7_E07_CD4p_Live.fcs	RMl17_Control_21_UNS	Control	RMl17	twenty_one	Control_twenty_one	UNS	E07
1457	Sample_57	8	36	0.0282575	25.2344	25.1658	0.546165	Sample_57	AI_export_Plate 1 UNS LN_E7_E07_CD4p_Live.fcs	RMl17_Control_21_UNS	Control	RMl17	twenty_one	Control_twenty_one	UNS	E07
1458	Sample_57	9	17	0.0133438	17.3655	23.3095	7.96991	Sample_57	AI_export_Plate 1 UNS LN_E7_E07_CD4p_Live.fcs	RMl17_Control_21_UNS	Control	RMl17	twenty_one	Control_twenty_one	UNS	E07
1459	Sample_58	1	280	0.21978	3.674	3.65407	2.46013	Sample_58	AI_export_Plate 1 UNS LN_E8_E08_CD4p_Live.fcs	RIb17_aIL10+aPD1_21_UNS	aIL10+aPD1	RIb17	twenty_one	aIL10+aPD1_twenty_one	UNS	E08
1460	Sample_58	10	132	0.103611	14.9997	15.4533	1.77147	Sample_58	AI_export_Plate 1 UNS LN_E8_E08_CD4p_Live.fcs	RIb17_aIL10+aPD1_21_UNS	aIL10+aPD1	RIb17	twenty_one	aIL10+aPD1_twenty_one	UNS	E08
1461	Sample_58	11	26	0.0204082	26.9528	27.557	2.07555	Sample_58	AI_export_Plate 1 UNS LN_E8_E08_CD4p_Live.fcs	RIb17_aIL10+aPD1_21_UNS	aIL10+aPD1	RIb17	twenty_one	aIL10+aPD1_twenty_one	UNS	E08
1462	Sample_58	12	8	0.00627943	9.36103	9.55562	0.570315	Sample_58	AI_export_Plate 1 UNS LN_E8_E08_CD4p_Live.fcs	RIb17_aIL10+aPD1_21_UNS	aIL10+aPD1	RIb17	twenty_one	aIL10+aPD1_twenty_one	UNS	E08
1463	Sample_58	13	22	0.0172684	18.6433	20.2525	3.33665	Sample_58	AI_export_Plate 1 UNS LN_E8_E08_CD4p_Live.fcs	RIb17_aIL10+aPD1_21_UNS	aIL10+aPD1	RIb17	twenty_one	aIL10+aPD1_twenty_one	UNS	E08
1464	Sample_58	14	1	0.000784929	27.342	27.342	NA	Sample_58	AI_export_Plate 1 UNS LN_E8_E08_CD4p_Live.fcs	RIb17_aIL10+aPD1_21_UNS	aIL10+aPD1	RIb17	twenty_one	aIL10+aPD1_twenty_one	UNS	E08
1465	Sample_58	15	0	0	NA	NA	NA	Sample_58	AI_export_Plate 1 UNS LN_E8_E08_CD4p_Live.fcs	RIb17_aIL10+aPD1_21_UNS	aIL10+aPD1	RIb17	twenty_one	aIL10+aPD1_twenty_one	UNS	E08
1466	Sample_58	16	1	0.000784929	27.2674	27.2674	NA	Sample_58	AI_export_Plate 1 UNS LN_E8_E08_CD4p_Live.fcs	RIb17_aIL10+aPD1_21_UNS	aIL10+aPD1	RIb17	twenty_one	aIL10+aPD1_twenty_one	UNS	E08
1467	Sample_58	17	0	0	NA	NA	NA	Sample_58	AI_export_Plate 1 UNS LN_E8_E08_CD4p_Live.fcs	RIb17_aIL10+aPD1_21_UNS	aIL10+aPD1	RIb17	twenty_one	aIL10+aPD1_twenty_one	UNS	E08
1468	Sample_58	18	1	0.000784929	3.63782	3.63782	NA	Sample_58	AI_export_Plate 1 UNS LN_E8_E08_CD4p_Live.fcs	RIb17_aIL10+aPD1_21_UNS	aIL10+aPD1	RIb17	twenty_one	aIL10+aPD1_twenty_one	UNS	E08
1469	Sample_58	2	150	0.117739	3.53617	3.14803	2.08532	Sample_58	AI_export_Plate 1 UNS LN_E8_E08_CD4p_Live.fcs	RIb17_aIL10+aPD1_21_UNS	aIL10+aPD1	RIb17	twenty_one	aIL10+aPD1_twenty_one	UNS	E08
1470	Sample_58	3	193	0.151491	9.49799	9.71498	2.36246	Sample_58	AI_export_Plate 1 UNS LN_E8_E08_CD4p_Live.fcs	RIb17_aIL10+aPD1_21_UNS	aIL10+aPD1	RIb17	twenty_one	aIL10+aPD1_twenty_one	UNS	E08
1471	Sample_58	4	102	0.0800628	19.3044	19.6565	3.79389	Sample_58	AI_export_Plate 1 UNS LN_E8_E08_CD4p_Live.fcs	RIb17_aIL10+aPD1_21_UNS	aIL10+aPD1	RIb17	twenty_one	aIL10+aPD1_twenty_one	UNS	E08
1472	Sample_58	5	103	0.0808477	23.1202	23.173	0.867285	Sample_58	AI_export_Plate 1 UNS LN_E8_E08_CD4p_Live.fcs	RIb17_aIL10+aPD1_21_UNS	aIL10+aPD1	RIb17	twenty_one	aIL10+aPD1_twenty_one	UNS	E08
1473	Sample_58	6	113	0.088697	5.98838	5.97209	1.75722	Sample_58	AI_export_Plate 1 UNS LN_E8_E08_CD4p_Live.fcs	RIb17_aIL10+aPD1_21_UNS	aIL10+aPD1	RIb17	twenty_one	aIL10+aPD1_twenty_one	UNS	E08
1474	Sample_58	7	48	0.0376766	19.49	20.3545	1.51379	Sample_58	AI_export_Plate 1 UNS LN_E8_E08_CD4p_Live.fcs	RIb17_aIL10+aPD1_21_UNS	aIL10+aPD1	RIb17	twenty_one	aIL10+aPD1_twenty_one	UNS	E08
1475	Sample_58	8	69	0.0541601	25.4177	25.3951	0.545982	Sample_58	AI_export_Plate 1 UNS LN_E8_E08_CD4p_Live.fcs	RIb17_aIL10+aPD1_21_UNS	aIL10+aPD1	RIb17	twenty_one	aIL10+aPD1_twenty_one	UNS	E08
1476	Sample_58	9	25	0.0196232	20.1796	23.5609	6.55355	Sample_58	AI_export_Plate 1 UNS LN_E8_E08_CD4p_Live.fcs	RIb17_aIL10+aPD1_21_UNS	aIL10+aPD1	RIb17	twenty_one	aIL10+aPD1_twenty_one	UNS	E08
1477	Sample_59	1	203	0.159341	3.23572	3.26376	2.16944	Sample_59	AI_export_Plate 1 UNS LN_E9_E09_CD4p_Live.fcs	RFl17_aIL10+aPD1_36_UNS	aIL10+aPD1	RFl17	thirty_six	aIL10+aPD1_thirty_six	UNS	E09
1478	Sample_59	10	198	0.155416	14.8381	14.8735	1.77521	Sample_59	AI_export_Plate 1 UNS LN_E9_E09_CD4p_Live.fcs	RFl17_aIL10+aPD1_36_UNS	aIL10+aPD1	RFl17	thirty_six	aIL10+aPD1_thirty_six	UNS	E09
1479	Sample_59	11	15	0.0117739	27.3477	27.557	0.423106	Sample_59	AI_export_Plate 1 UNS LN_E9_E09_CD4p_Live.fcs	RFl17_aIL10+aPD1_36_UNS	aIL10+aPD1	RFl17	thirty_six	aIL10+aPD1_thirty_six	UNS	E09
1480	Sample_59	12	2	0.00156986	9.61244	9.61244	4.91847e-09	Sample_59	AI_export_Plate 1 UNS LN_E9_E09_CD4p_Live.fcs	RFl17_aIL10+aPD1_36_UNS	aIL10+aPD1	RFl17	thirty_six	aIL10+aPD1_thirty_six	UNS	E09
1481	Sample_59	13	22	0.0172684	17.7952	17.4779	3.8262	Sample_59	AI_export_Plate 1 UNS LN_E9_E09_CD4p_Live.fcs	RFl17_aIL10+aPD1_36_UNS	aIL10+aPD1	RFl17	thirty_six	aIL10+aPD1_thirty_six	UNS	E09
1482	Sample_59	14	0	0	NA	NA	NA	Sample_59	AI_export_Plate 1 UNS LN_E9_E09_CD4p_Live.fcs	RFl17_aIL10+aPD1_36_UNS	aIL10+aPD1	RFl17	thirty_six	aIL10+aPD1_thirty_six	UNS	E09
1483	Sample_59	15	0	0	NA	NA	NA	Sample_59	AI_export_Plate 1 UNS LN_E9_E09_CD4p_Live.fcs	RFl17_aIL10+aPD1_36_UNS	aIL10+aPD1	RFl17	thirty_six	aIL10+aPD1_thirty_six	UNS	E09
1484	Sample_59	16	0	0	NA	NA	NA	Sample_59	AI_export_Plate 1 UNS LN_E9_E09_CD4p_Live.fcs	RFl17_aIL10+aPD1_36_UNS	aIL10+aPD1	RFl17	thirty_six	aIL10+aPD1_thirty_six	UNS	E09
1485	Sample_59	17	0	0	NA	NA	NA	Sample_59	AI_export_Plate 1 UNS LN_E9_E09_CD4p_Live.fcs	RFl17_aIL10+aPD1_36_UNS	aIL10+aPD1	RFl17	thirty_six	aIL10+aPD1_thirty_six	UNS	E09
1486	Sample_59	18	1	0.000784929	NA	NA	NA	Sample_59	AI_export_Plate 1 UNS LN_E9_E09_CD4p_Live.fcs	RFl17_aIL10+aPD1_36_UNS	aIL10+aPD1	RFl17	thirty_six	aIL10+aPD1_thirty_six	UNS	E09
1487	Sample_59	2	229	0.179749	3.49285	3.07097	2.23772	Sample_59	AI_export_Plate 1 UNS LN_E9_E09_CD4p_Live.fcs	RFl17_aIL10+aPD1_36_UNS	aIL10+aPD1	RFl17	thirty_six	aIL10+aPD1_thirty_six	UNS	E09
1488	Sample_59	3	222	0.174254	9.90446	10.1005	2.31942	Sample_59	AI_export_Plate 1 UNS LN_E9_E09_CD4p_Live.fcs	RFl17_aIL10+aPD1_36_UNS	aIL10+aPD1	RFl17	thirty_six	aIL10+aPD1_thirty_six	UNS	E09
1489	Sample_59	4	112	0.0879121	18.7626	19.1683	3.17802	Sample_59	AI_export_Plate 1 UNS LN_E9_E09_CD4p_Live.fcs	RFl17_aIL10+aPD1_36_UNS	aIL10+aPD1	RFl17	thirty_six	aIL10+aPD1_thirty_six	UNS	E09
1490	Sample_59	5	79	0.0620094	22.7962	22.7311	1.52151	Sample_59	AI_export_Plate 1 UNS LN_E9_E09_CD4p_Live.fcs	RFl17_aIL10+aPD1_36_UNS	aIL10+aPD1	RFl17	thirty_six	aIL10+aPD1_thirty_six	UNS	E09
1491	Sample_59	6	118	0.0926217	5.89596	6.08237	1.57878	Sample_59	AI_export_Plate 1 UNS LN_E9_E09_CD4p_Live.fcs	RFl17_aIL10+aPD1_36_UNS	aIL10+aPD1	RFl17	thirty_six	aIL10+aPD1_thirty_six	UNS	E09
1492	Sample_59	7	37	0.0290424	18.4494	18.1292	2.42786	Sample_59	AI_export_Plate 1 UNS LN_E9_E09_CD4p_Live.fcs	RFl17_aIL10+aPD1_36_UNS	aIL10+aPD1	RFl17	thirty_six	aIL10+aPD1_thirty_six	UNS	E09
1493	Sample_59	8	25	0.0196232	25.3173	25.2744	0.873466	Sample_59	AI_export_Plate 1 UNS LN_E9_E09_CD4p_Live.fcs	RFl17_aIL10+aPD1_36_UNS	aIL10+aPD1	RFl17	thirty_six	aIL10+aPD1_thirty_six	UNS	E09
1494	Sample_59	9	11	0.00863422	18.9673	23.5609	7.76489	Sample_59	AI_export_Plate 1 UNS LN_E9_E09_CD4p_Live.fcs	RFl17_aIL10+aPD1_36_UNS	aIL10+aPD1	RFl17	thirty_six	aIL10+aPD1_thirty_six	UNS	E09
1495	Sample_6	1	280	0.21978	3.82944	3.96329	1.99855	Sample_6	AI_export_Plate 1 UNS LN_A3_A03_CD4p_Live.fcs	RVz16_Control_-1_UNS	Control	RVz16	minus_one	Control_minus_one	UNS	A03
1496	Sample_6	10	190	0.149137	15.0835	15.3104	1.72922	Sample_6	AI_export_Plate 1 UNS LN_A3_A03_CD4p_Live.fcs	RVz16_Control_-1_UNS	Control	RVz16	minus_one	Control_minus_one	UNS	A03
1497	Sample_6	11	2	0.00156986	27.557	27.557	4.91847e-09	Sample_6	AI_export_Plate 1 UNS LN_A3_A03_CD4p_Live.fcs	RVz16_Control_-1_UNS	Control	RVz16	minus_one	Control_minus_one	UNS	A03
1498	Sample_6	12	4	0.00313972	7.68551	7.63542	1.45703	Sample_6	AI_export_Plate 1 UNS LN_A3_A03_CD4p_Live.fcs	RVz16_Control_-1_UNS	Control	RVz16	minus_one	Control_minus_one	UNS	A03
1499	Sample_6	13	9	0.00706436	19.0872	19.1671	2.06724	Sample_6	AI_export_Plate 1 UNS LN_A3_A03_CD4p_Live.fcs	RVz16_Control_-1_UNS	Control	RVz16	minus_one	Control_minus_one	UNS	A03
1500	Sample_6	14	1	0.000784929	27.342	27.342	NA	Sample_6	AI_export_Plate 1 UNS LN_A3_A03_CD4p_Live.fcs	RVz16_Control_-1_UNS	Control	RVz16	minus_one	Control_minus_one	UNS	A03
1501	Sample_6	15	0	0	NA	NA	NA	Sample_6	AI_export_Plate 1 UNS LN_A3_A03_CD4p_Live.fcs	RVz16_Control_-1_UNS	Control	RVz16	minus_one	Control_minus_one	UNS	A03
1502	Sample_6	16	0	0	NA	NA	NA	Sample_6	AI_export_Plate 1 UNS LN_A3_A03_CD4p_Live.fcs	RVz16_Control_-1_UNS	Control	RVz16	minus_one	Control_minus_one	UNS	A03
1503	Sample_6	17	2	0.00156986	26.1757	26.1757	NA	Sample_6	AI_export_Plate 1 UNS LN_A3_A03_CD4p_Live.fcs	RVz16_Control_-1_UNS	Control	RVz16	minus_one	Control_minus_one	UNS	A03
1504	Sample_6	18	1	0.000784929	3.63783	3.63783	NA	Sample_6	AI_export_Plate 1 UNS LN_A3_A03_CD4p_Live.fcs	RVz16_Control_-1_UNS	Control	RVz16	minus_one	Control_minus_one	UNS	A03
1505	Sample_6	2	127	0.099686	4.03575	3.6414	2.22172	Sample_6	AI_export_Plate 1 UNS LN_A3_A03_CD4p_Live.fcs	RVz16_Control_-1_UNS	Control	RVz16	minus_one	Control_minus_one	UNS	A03
1506	Sample_6	3	183	0.143642	9.72473	9.84735	2.30531	Sample_6	AI_export_Plate 1 UNS LN_A3_A03_CD4p_Live.fcs	RVz16_Control_-1_UNS	Control	RVz16	minus_one	Control_minus_one	UNS	A03
1507	Sample_6	4	100	0.0784929	19.1069	18.6248	3.14014	Sample_6	AI_export_Plate 1 UNS LN_A3_A03_CD4p_Live.fcs	RVz16_Control_-1_UNS	Control	RVz16	minus_one	Control_minus_one	UNS	A03
1508	Sample_6	5	116	0.0910518	22.7476	22.7177	1.13609	Sample_6	AI_export_Plate 1 UNS LN_A3_A03_CD4p_Live.fcs	RVz16_Control_-1_UNS	Control	RVz16	minus_one	Control_minus_one	UNS	A03
1509	Sample_6	6	156	0.122449	5.50379	5.64732	1.18403	Sample_6	AI_export_Plate 1 UNS LN_A3_A03_CD4p_Live.fcs	RVz16_Control_-1_UNS	Control	RVz16	minus_one	Control_minus_one	UNS	A03
1510	Sample_6	7	53	0.0416013	18.6019	20.3545	4.20345	Sample_6	AI_export_Plate 1 UNS LN_A3_A03_CD4p_Live.fcs	RVz16_Control_-1_UNS	Control	RVz16	minus_one	Control_minus_one	UNS	A03
1511	Sample_6	8	15	0.0117739	25.7024	25.8561	0.55276	Sample_6	AI_export_Plate 1 UNS LN_A3_A03_CD4p_Live.fcs	RVz16_Control_-1_UNS	Control	RVz16	minus_one	Control_minus_one	UNS	A03
1512	Sample_6	9	35	0.0274725	15.7776	23.3095	8.38446	Sample_6	AI_export_Plate 1 UNS LN_A3_A03_CD4p_Live.fcs	RVz16_Control_-1_UNS	Control	RVz16	minus_one	Control_minus_one	UNS	A03
1513	Sample_60	1	162	0.127159	3.44565	3.08483	2.88699	Sample_60	AI_export_Plate 1 UNS LN_F1_F01_CD4p_Live.fcs	RHm17_aIL10_36_UNS	aIL10	RHm17	thirty_six	aIL10_thirty_six	UNS	F01
1514	Sample_60	10	123	0.0965463	15.2431	15.6652	1.46474	Sample_60	AI_export_Plate 1 UNS LN_F1_F01_CD4p_Live.fcs	RHm17_aIL10_36_UNS	aIL10	RHm17	thirty_six	aIL10_thirty_six	UNS	F01
1515	Sample_60	11	43	0.033752	26.4881	27.3972	3.01471	Sample_60	AI_export_Plate 1 UNS LN_F1_F01_CD4p_Live.fcs	RHm17_aIL10_36_UNS	aIL10	RHm17	thirty_six	aIL10_thirty_six	UNS	F01
1516	Sample_60	12	10	0.00784929	10.8739	9.61245	5.95289	Sample_60	AI_export_Plate 1 UNS LN_F1_F01_CD4p_Live.fcs	RHm17_aIL10_36_UNS	aIL10	RHm17	thirty_six	aIL10_thirty_six	UNS	F01
1517	Sample_60	13	112	0.0879121	18.545	17.4779	2.42772	Sample_60	AI_export_Plate 1 UNS LN_F1_F01_CD4p_Live.fcs	RHm17_aIL10_36_UNS	aIL10	RHm17	thirty_six	aIL10_thirty_six	UNS	F01
1518	Sample_60	14	1	0.000784929	27.342	27.342	NA	Sample_60	AI_export_Plate 1 UNS LN_F1_F01_CD4p_Live.fcs	RHm17_aIL10_36_UNS	aIL10	RHm17	thirty_six	aIL10_thirty_six	UNS	F01
1519	Sample_60	15	1	0.000784929	NA	NA	NA	Sample_60	AI_export_Plate 1 UNS LN_F1_F01_CD4p_Live.fcs	RHm17_aIL10_36_UNS	aIL10	RHm17	thirty_six	aIL10_thirty_six	UNS	F01
1520	Sample_60	16	1	0.000784929	27.3327	27.3327	NA	Sample_60	AI_export_Plate 1 UNS LN_F1_F01_CD4p_Live.fcs	RHm17_aIL10_36_UNS	aIL10	RHm17	thirty_six	aIL10_thirty_six	UNS	F01
1521	Sample_60	17	3	0.00235479	NA	NA	NA	Sample_60	AI_export_Plate 1 UNS LN_F1_F01_CD4p_Live.fcs	RHm17_aIL10_36_UNS	aIL10	RHm17	thirty_six	aIL10_thirty_six	UNS	F01
1522	Sample_60	18	0	0	NA	NA	NA	Sample_60	AI_export_Plate 1 UNS LN_F1_F01_CD4p_Live.fcs	RHm17_aIL10_36_UNS	aIL10	RHm17	thirty_six	aIL10_thirty_six	UNS	F01
1523	Sample_60	2	173	0.135793	3.4907	3.12707	1.7463	Sample_60	AI_export_Plate 1 UNS LN_F1_F01_CD4p_Live.fcs	RHm17_aIL10_36_UNS	aIL10	RHm17	thirty_six	aIL10_thirty_six	UNS	F01
1524	Sample_60	3	245	0.192308	10.1881	10.2136	2.48205	Sample_60	AI_export_Plate 1 UNS LN_F1_F01_CD4p_Live.fcs	RHm17_aIL10_36_UNS	aIL10	RHm17	thirty_six	aIL10_thirty_six	UNS	F01
1525	Sample_60	4	77	0.0604396	18.3794	18.7286	2.96029	Sample_60	AI_export_Plate 1 UNS LN_F1_F01_CD4p_Live.fcs	RHm17_aIL10_36_UNS	aIL10	RHm17	thirty_six	aIL10_thirty_six	UNS	F01
1526	Sample_60	5	103	0.0808477	22.925	23.173	2.36258	Sample_60	AI_export_Plate 1 UNS LN_F1_F01_CD4p_Live.fcs	RHm17_aIL10_36_UNS	aIL10	RHm17	thirty_six	aIL10_thirty_six	UNS	F01
1527	Sample_60	6	91	0.0714286	6.06623	6.13118	2.02573	Sample_60	AI_export_Plate 1 UNS LN_F1_F01_CD4p_Live.fcs	RHm17_aIL10_36_UNS	aIL10	RHm17	thirty_six	aIL10_thirty_six	UNS	F01
1528	Sample_60	7	38	0.0298273	19.5434	20.414	1.982	Sample_60	AI_export_Plate 1 UNS LN_F1_F01_CD4p_Live.fcs	RHm17_aIL10_36_UNS	aIL10	RHm17	thirty_six	aIL10_thirty_six	UNS	F01
1529	Sample_60	8	56	0.043956	25.7863	25.9174	0.695871	Sample_60	AI_export_Plate 1 UNS LN_F1_F01_CD4p_Live.fcs	RHm17_aIL10_36_UNS	aIL10	RHm17	thirty_six	aIL10_thirty_six	UNS	F01
1530	Sample_60	9	35	0.0274725	20.6412	23.5609	6.20961	Sample_60	AI_export_Plate 1 UNS LN_F1_F01_CD4p_Live.fcs	RHm17_aIL10_36_UNS	aIL10	RHm17	thirty_six	aIL10_thirty_six	UNS	F01
1531	Sample_61	1	200	0.156986	3.94736	4.04283	2.19825	Sample_61	AI_export_Plate 1 UNS LN_F10_F10_CD4p_Live.fcs	RIb17_aIL10+aPD1_36_UNS	aIL10+aPD1	RIb17	thirty_six	aIL10+aPD1_thirty_six	UNS	F10
1532	Sample_61	10	211	0.16562	14.9873	15.4656	1.67416	Sample_61	AI_export_Plate 1 UNS LN_F10_F10_CD4p_Live.fcs	RIb17_aIL10+aPD1_36_UNS	aIL10+aPD1	RIb17	thirty_six	aIL10+aPD1_thirty_six	UNS	F10
1533	Sample_61	11	21	0.0164835	27.385	27.557	0.370857	Sample_61	AI_export_Plate 1 UNS LN_F10_F10_CD4p_Live.fcs	RIb17_aIL10+aPD1_36_UNS	aIL10+aPD1	RIb17	thirty_six	aIL10+aPD1_thirty_six	UNS	F10
1534	Sample_61	12	9	0.00706436	10.9799	9.61245	5.67997	Sample_61	AI_export_Plate 1 UNS LN_F10_F10_CD4p_Live.fcs	RIb17_aIL10+aPD1_36_UNS	aIL10+aPD1	RIb17	thirty_six	aIL10+aPD1_thirty_six	UNS	F10
1535	Sample_61	13	19	0.0149137	17.7815	17.4779	1.51264	Sample_61	AI_export_Plate 1 UNS LN_F10_F10_CD4p_Live.fcs	RIb17_aIL10+aPD1_36_UNS	aIL10+aPD1	RIb17	thirty_six	aIL10+aPD1_thirty_six	UNS	F10
1536	Sample_61	14	0	0	NA	NA	NA	Sample_61	AI_export_Plate 1 UNS LN_F10_F10_CD4p_Live.fcs	RIb17_aIL10+aPD1_36_UNS	aIL10+aPD1	RIb17	thirty_six	aIL10+aPD1_thirty_six	UNS	F10
1537	Sample_61	15	0	0	NA	NA	NA	Sample_61	AI_export_Plate 1 UNS LN_F10_F10_CD4p_Live.fcs	RIb17_aIL10+aPD1_36_UNS	aIL10+aPD1	RIb17	thirty_six	aIL10+aPD1_thirty_six	UNS	F10
1538	Sample_61	16	2	0.00156986	27.2369	27.2369	0.137298	Sample_61	AI_export_Plate 1 UNS LN_F10_F10_CD4p_Live.fcs	RIb17_aIL10+aPD1_36_UNS	aIL10+aPD1	RIb17	thirty_six	aIL10+aPD1_thirty_six	UNS	F10
1539	Sample_61	17	1	0.000784929	NA	NA	NA	Sample_61	AI_export_Plate 1 UNS LN_F10_F10_CD4p_Live.fcs	RIb17_aIL10+aPD1_36_UNS	aIL10+aPD1	RIb17	thirty_six	aIL10+aPD1_thirty_six	UNS	F10
1540	Sample_61	18	1	0.000784929	NA	NA	NA	Sample_61	AI_export_Plate 1 UNS LN_F10_F10_CD4p_Live.fcs	RIb17_aIL10+aPD1_36_UNS	aIL10+aPD1	RIb17	thirty_six	aIL10+aPD1_thirty_six	UNS	F10
1541	Sample_61	2	218	0.171115	3.45657	3.17803	1.5817	Sample_61	AI_export_Plate 1 UNS LN_F10_F10_CD4p_Live.fcs	RIb17_aIL10+aPD1_36_UNS	aIL10+aPD1	RIb17	thirty_six	aIL10+aPD1_thirty_six	UNS	F10
1542	Sample_61	3	201	0.157771	9.81801	10.1145	1.80797	Sample_61	AI_export_Plate 1 UNS LN_F10_F10_CD4p_Live.fcs	RIb17_aIL10+aPD1_36_UNS	aIL10+aPD1	RIb17	thirty_six	aIL10+aPD1_thirty_six	UNS	F10
1543	Sample_61	4	178	0.139717	18.2698	18.5779	3.2581	Sample_61	AI_export_Plate 1 UNS LN_F10_F10_CD4p_Live.fcs	RIb17_aIL10+aPD1_36_UNS	aIL10+aPD1	RIb17	thirty_six	aIL10+aPD1_thirty_six	UNS	F10
1544	Sample_61	5	64	0.0502355	22.5917	23.0877	3.3434	Sample_61	AI_export_Plate 1 UNS LN_F10_F10_CD4p_Live.fcs	RIb17_aIL10+aPD1_36_UNS	aIL10+aPD1	RIb17	thirty_six	aIL10+aPD1_thirty_six	UNS	F10
1545	Sample_61	6	75	0.0588697	5.58451	5.64731	1.20315	Sample_61	AI_export_Plate 1 UNS LN_F10_F10_CD4p_Live.fcs	RIb17_aIL10+aPD1_36_UNS	aIL10+aPD1	RIb17	thirty_six	aIL10+aPD1_thirty_six	UNS	F10
1546	Sample_61	7	47	0.0368917	18.9293	20.1516	2.9954	Sample_61	AI_export_Plate 1 UNS LN_F10_F10_CD4p_Live.fcs	RIb17_aIL10+aPD1_36_UNS	aIL10+aPD1	RIb17	thirty_six	aIL10+aPD1_thirty_six	UNS	F10
1547	Sample_61	8	13	0.0102041	25.5637	25.6697	0.455257	Sample_61	AI_export_Plate 1 UNS LN_F10_F10_CD4p_Live.fcs	RIb17_aIL10+aPD1_36_UNS	aIL10+aPD1	RIb17	thirty_six	aIL10+aPD1_thirty_six	UNS	F10
1548	Sample_61	9	14	0.010989	20.1425	23.5609	6.76263	Sample_61	AI_export_Plate 1 UNS LN_F10_F10_CD4p_Live.fcs	RIb17_aIL10+aPD1_36_UNS	aIL10+aPD1	RIb17	thirty_six	aIL10+aPD1_thirty_six	UNS	F10
1549	Sample_62	1	309	0.242543	3.8473	4.09525	2.27778	Sample_62	AI_export_Plate 1 UNS LN_F11_F11_CD4p_Live.fcs	34918_aIL10+aPD1_-1_UNS	aIL10+aPD1	34918	minus_one	aIL10+aPD1_minus_one	UNS	F11
1550	Sample_62	10	86	0.0675039	14.8999	14.6111	2.09172	Sample_62	AI_export_Plate 1 UNS LN_F11_F11_CD4p_Live.fcs	34918_aIL10+aPD1_-1_UNS	aIL10+aPD1	34918	minus_one	aIL10+aPD1_minus_one	UNS	F11
1551	Sample_62	11	3	0.00235479	27.2543	27.4249	0.415111	Sample_62	AI_export_Plate 1 UNS LN_F11_F11_CD4p_Live.fcs	34918_aIL10+aPD1_-1_UNS	aIL10+aPD1	34918	minus_one	aIL10+aPD1_minus_one	UNS	F11
1552	Sample_62	12	18	0.0141287	11.225	9.61245	4.9642	Sample_62	AI_export_Plate 1 UNS LN_F11_F11_CD4p_Live.fcs	34918_aIL10+aPD1_-1_UNS	aIL10+aPD1	34918	minus_one	aIL10+aPD1_minus_one	UNS	F11
1553	Sample_62	13	11	0.00863422	15.904	17.4779	3.49546	Sample_62	AI_export_Plate 1 UNS LN_F11_F11_CD4p_Live.fcs	34918_aIL10+aPD1_-1_UNS	aIL10+aPD1	34918	minus_one	aIL10+aPD1_minus_one	UNS	F11
1554	Sample_62	14	1	0.000784929	26.1757	26.1757	NA	Sample_62	AI_export_Plate 1 UNS LN_F11_F11_CD4p_Live.fcs	34918_aIL10+aPD1_-1_UNS	aIL10+aPD1	34918	minus_one	aIL10+aPD1_minus_one	UNS	F11
1555	Sample_62	15	0	0	NA	NA	NA	Sample_62	AI_export_Plate 1 UNS LN_F11_F11_CD4p_Live.fcs	34918_aIL10+aPD1_-1_UNS	aIL10+aPD1	34918	minus_one	aIL10+aPD1_minus_one	UNS	F11
1556	Sample_62	16	1	0.000784929	27.0689	27.0689	NA	Sample_62	AI_export_Plate 1 UNS LN_F11_F11_CD4p_Live.fcs	34918_aIL10+aPD1_-1_UNS	aIL10+aPD1	34918	minus_one	aIL10+aPD1_minus_one	UNS	F11
1557	Sample_62	17	0	0	NA	NA	NA	Sample_62	AI_export_Plate 1 UNS LN_F11_F11_CD4p_Live.fcs	34918_aIL10+aPD1_-1_UNS	aIL10+aPD1	34918	minus_one	aIL10+aPD1_minus_one	UNS	F11
1558	Sample_62	18	1	0.000784929	NA	NA	NA	Sample_62	AI_export_Plate 1 UNS LN_F11_F11_CD4p_Live.fcs	34918_aIL10+aPD1_-1_UNS	aIL10+aPD1	34918	minus_one	aIL10+aPD1_minus_one	UNS	F11
1559	Sample_62	2	233	0.182889	3.36082	3.10113	2.23712	Sample_62	AI_export_Plate 1 UNS LN_F11_F11_CD4p_Live.fcs	34918_aIL10+aPD1_-1_UNS	aIL10+aPD1	34918	minus_one	aIL10+aPD1_minus_one	UNS	F11
1560	Sample_62	3	256	0.200942	9.48113	9.49676	2.20365	Sample_62	AI_export_Plate 1 UNS LN_F11_F11_CD4p_Live.fcs	34918_aIL10+aPD1_-1_UNS	aIL10+aPD1	34918	minus_one	aIL10+aPD1_minus_one	UNS	F11
1561	Sample_62	4	82	0.0643642	18.7376	19.0443	3.10176	Sample_62	AI_export_Plate 1 UNS LN_F11_F11_CD4p_Live.fcs	34918_aIL10+aPD1_-1_UNS	aIL10+aPD1	34918	minus_one	aIL10+aPD1_minus_one	UNS	F11
1562	Sample_62	5	60	0.0470958	22.9418	23.3885	2.19224	Sample_62	AI_export_Plate 1 UNS LN_F11_F11_CD4p_Live.fcs	34918_aIL10+aPD1_-1_UNS	aIL10+aPD1	34918	minus_one	aIL10+aPD1_minus_one	UNS	F11
1563	Sample_62	6	137	0.107535	5.6969	5.96386	1.38867	Sample_62	AI_export_Plate 1 UNS LN_F11_F11_CD4p_Live.fcs	34918_aIL10+aPD1_-1_UNS	aIL10+aPD1	34918	minus_one	aIL10+aPD1_minus_one	UNS	F11
1564	Sample_62	7	47	0.0368917	18.3014	18.1129	4.03377	Sample_62	AI_export_Plate 1 UNS LN_F11_F11_CD4p_Live.fcs	34918_aIL10+aPD1_-1_UNS	aIL10+aPD1	34918	minus_one	aIL10+aPD1_minus_one	UNS	F11
1565	Sample_62	8	11	0.00863422	25.5879	25.7973	0.577102	Sample_62	AI_export_Plate 1 UNS LN_F11_F11_CD4p_Live.fcs	34918_aIL10+aPD1_-1_UNS	aIL10+aPD1	34918	minus_one	aIL10+aPD1_minus_one	UNS	F11
1566	Sample_62	9	18	0.0141287	21.6944	23.5609	5.38812	Sample_62	AI_export_Plate 1 UNS LN_F11_F11_CD4p_Live.fcs	34918_aIL10+aPD1_-1_UNS	aIL10+aPD1	34918	minus_one	aIL10+aPD1_minus_one	UNS	F11
1567	Sample_63	1	139	0.109105	3.1357	2.72005	2.45115	Sample_63	AI_export_Plate 1 UNS LN_F12_F12_CD4p_Live.fcs	RBf17_aIL10+aPD1_-1_UNS	aIL10+aPD1	RBf17	minus_one	aIL10+aPD1_minus_one	UNS	F12
1568	Sample_63	10	203	0.159341	14.9327	14.63	1.41519	Sample_63	AI_export_Plate 1 UNS LN_F12_F12_CD4p_Live.fcs	RBf17_aIL10+aPD1_-1_UNS	aIL10+aPD1	RBf17	minus_one	aIL10+aPD1_minus_one	UNS	F12
1569	Sample_63	11	10	0.00784929	27.5484	27.557	0.0548171	Sample_63	AI_export_Plate 1 UNS LN_F12_F12_CD4p_Live.fcs	RBf17_aIL10+aPD1_-1_UNS	aIL10+aPD1	RBf17	minus_one	aIL10+aPD1_minus_one	UNS	F12
1570	Sample_63	12	9	0.00706436	9.042	9.36282	1.02582	Sample_63	AI_export_Plate 1 UNS LN_F12_F12_CD4p_Live.fcs	RBf17_aIL10+aPD1_-1_UNS	aIL10+aPD1	RBf17	minus_one	aIL10+aPD1_minus_one	UNS	F12
1571	Sample_63	13	15	0.0117739	17.2169	17.4779	6.142	Sample_63	AI_export_Plate 1 UNS LN_F12_F12_CD4p_Live.fcs	RBf17_aIL10+aPD1_-1_UNS	aIL10+aPD1	RBf17	minus_one	aIL10+aPD1_minus_one	UNS	F12
1572	Sample_63	14	1	0.000784929	NA	NA	NA	Sample_63	AI_export_Plate 1 UNS LN_F12_F12_CD4p_Live.fcs	RBf17_aIL10+aPD1_-1_UNS	aIL10+aPD1	RBf17	minus_one	aIL10+aPD1_minus_one	UNS	F12
1573	Sample_63	15	0	0	NA	NA	NA	Sample_63	AI_export_Plate 1 UNS LN_F12_F12_CD4p_Live.fcs	RBf17_aIL10+aPD1_-1_UNS	aIL10+aPD1	RBf17	minus_one	aIL10+aPD1_minus_one	UNS	F12
1574	Sample_63	16	0	0	NA	NA	NA	Sample_63	AI_export_Plate 1 UNS LN_F12_F12_CD4p_Live.fcs	RBf17_aIL10+aPD1_-1_UNS	aIL10+aPD1	RBf17	minus_one	aIL10+aPD1_minus_one	UNS	F12
1575	Sample_63	17	1	0.000784929	NA	NA	NA	Sample_63	AI_export_Plate 1 UNS LN_F12_F12_CD4p_Live.fcs	RBf17_aIL10+aPD1_-1_UNS	aIL10+aPD1	RBf17	minus_one	aIL10+aPD1_minus_one	UNS	F12
1576	Sample_63	18	0	0	NA	NA	NA	Sample_63	AI_export_Plate 1 UNS LN_F12_F12_CD4p_Live.fcs	RBf17_aIL10+aPD1_-1_UNS	aIL10+aPD1	RBf17	minus_one	aIL10+aPD1_minus_one	UNS	F12
1577	Sample_63	2	300	0.235479	3.41328	3.23134	1.7573	Sample_63	AI_export_Plate 1 UNS LN_F12_F12_CD4p_Live.fcs	RBf17_aIL10+aPD1_-1_UNS	aIL10+aPD1	RBf17	minus_one	aIL10+aPD1_minus_one	UNS	F12
1578	Sample_63	3	330	0.259027	9.99094	10.1845	1.89653	Sample_63	AI_export_Plate 1 UNS LN_F12_F12_CD4p_Live.fcs	RBf17_aIL10+aPD1_-1_UNS	aIL10+aPD1	RBf17	minus_one	aIL10+aPD1_minus_one	UNS	F12
1579	Sample_63	4	118	0.0926217	18.3263	19.2124	3.0616	Sample_63	AI_export_Plate 1 UNS LN_F12_F12_CD4p_Live.fcs	RBf17_aIL10+aPD1_-1_UNS	aIL10+aPD1	RBf17	minus_one	aIL10+aPD1_minus_one	UNS	F12
1580	Sample_63	5	49	0.0384615	23.0241	22.8446	0.715677	Sample_63	AI_export_Plate 1 UNS LN_F12_F12_CD4p_Live.fcs	RBf17_aIL10+aPD1_-1_UNS	aIL10+aPD1	RBf17	minus_one	aIL10+aPD1_minus_one	UNS	F12
1581	Sample_63	6	50	0.0392465	5.05443	5.02158	1.73072	Sample_63	AI_export_Plate 1 UNS LN_F12_F12_CD4p_Live.fcs	RBf17_aIL10+aPD1_-1_UNS	aIL10+aPD1	RBf17	minus_one	aIL10+aPD1_minus_one	UNS	F12
1582	Sample_63	7	32	0.0251177	17.774	17.7506	2.56483	Sample_63	AI_export_Plate 1 UNS LN_F12_F12_CD4p_Live.fcs	RBf17_aIL10+aPD1_-1_UNS	aIL10+aPD1	RBf17	minus_one	aIL10+aPD1_minus_one	UNS	F12
1583	Sample_63	8	10	0.00784929	25.7383	25.8232	0.516143	Sample_63	AI_export_Plate 1 UNS LN_F12_F12_CD4p_Live.fcs	RBf17_aIL10+aPD1_-1_UNS	aIL10+aPD1	RBf17	minus_one	aIL10+aPD1_minus_one	UNS	F12
1584	Sample_63	9	7	0.00549451	18.8512	23.3095	7.78897	Sample_63	AI_export_Plate 1 UNS LN_F12_F12_CD4p_Live.fcs	RBf17_aIL10+aPD1_-1_UNS	aIL10+aPD1	RBf17	minus_one	aIL10+aPD1_minus_one	UNS	F12
1585	Sample_64	1	213	0.16719	3.21707	2.92991	2.77035	Sample_64	AI_export_Plate 1 UNS LN_F2_F02_CD4p_Live.fcs	RNy16_aIL10+aPD1_36_UNS	aIL10+aPD1	RNy16	thirty_six	aIL10+aPD1_thirty_six	UNS	F02
1586	Sample_64	10	148	0.11617	14.6681	14.6009	1.99166	Sample_64	AI_export_Plate 1 UNS LN_F2_F02_CD4p_Live.fcs	RNy16_aIL10+aPD1_36_UNS	aIL10+aPD1	RNy16	thirty_six	aIL10+aPD1_thirty_six	UNS	F02
1587	Sample_64	11	14	0.010989	25.9465	27.557	4.92404	Sample_64	AI_export_Plate 1 UNS LN_F2_F02_CD4p_Live.fcs	RNy16_aIL10+aPD1_36_UNS	aIL10+aPD1	RNy16	thirty_six	aIL10+aPD1_thirty_six	UNS	F02
1588	Sample_64	12	7	0.00549451	9.57336	9.61245	0.0718851	Sample_64	AI_export_Plate 1 UNS LN_F2_F02_CD4p_Live.fcs	RNy16_aIL10+aPD1_36_UNS	aIL10+aPD1	RNy16	thirty_six	aIL10+aPD1_thirty_six	UNS	F02
1589	Sample_64	13	12	0.00941915	17.8801	17.4779	1.46942	Sample_64	AI_export_Plate 1 UNS LN_F2_F02_CD4p_Live.fcs	RNy16_aIL10+aPD1_36_UNS	aIL10+aPD1	RNy16	thirty_six	aIL10+aPD1_thirty_six	UNS	F02
1590	Sample_64	14	0	0	NA	NA	NA	Sample_64	AI_export_Plate 1 UNS LN_F2_F02_CD4p_Live.fcs	RNy16_aIL10+aPD1_36_UNS	aIL10+aPD1	RNy16	thirty_six	aIL10+aPD1_thirty_six	UNS	F02
1591	Sample_64	15	1	0.000784929	NA	NA	NA	Sample_64	AI_export_Plate 1 UNS LN_F2_F02_CD4p_Live.fcs	RNy16_aIL10+aPD1_36_UNS	aIL10+aPD1	RNy16	thirty_six	aIL10+aPD1_thirty_six	UNS	F02
1592	Sample_64	16	5	0.00392465	27.2567	27.2521	0.0725004	Sample_64	AI_export_Plate 1 UNS LN_F2_F02_CD4p_Live.fcs	RNy16_aIL10+aPD1_36_UNS	aIL10+aPD1	RNy16	thirty_six	aIL10+aPD1_thirty_six	UNS	F02
1593	Sample_64	17	1	0.000784929	NA	NA	NA	Sample_64	AI_export_Plate 1 UNS LN_F2_F02_CD4p_Live.fcs	RNy16_aIL10+aPD1_36_UNS	aIL10+aPD1	RNy16	thirty_six	aIL10+aPD1_thirty_six	UNS	F02
1594	Sample_64	18	0	0	NA	NA	NA	Sample_64	AI_export_Plate 1 UNS LN_F2_F02_CD4p_Live.fcs	RNy16_aIL10+aPD1_36_UNS	aIL10+aPD1	RNy16	thirty_six	aIL10+aPD1_thirty_six	UNS	F02
1595	Sample_64	2	192	0.150706	3.51506	3.36561	1.53646	Sample_64	AI_export_Plate 1 UNS LN_F2_F02_CD4p_Live.fcs	RNy16_aIL10+aPD1_36_UNS	aIL10+aPD1	RNy16	thirty_six	aIL10+aPD1_thirty_six	UNS	F02
1596	Sample_64	3	252	0.197802	10.0319	10.0797	2.20797	Sample_64	AI_export_Plate 1 UNS LN_F2_F02_CD4p_Live.fcs	RNy16_aIL10+aPD1_36_UNS	aIL10+aPD1	RNy16	thirty_six	aIL10+aPD1_thirty_six	UNS	F02
1597	Sample_64	4	141	0.110675	18.8578	18.8366	2.7101	Sample_64	AI_export_Plate 1 UNS LN_F2_F02_CD4p_Live.fcs	RNy16_aIL10+aPD1_36_UNS	aIL10+aPD1	RNy16	thirty_six	aIL10+aPD1_thirty_six	UNS	F02
1598	Sample_64	5	107	0.0839874	23.099	23.3563	1.22795	Sample_64	AI_export_Plate 1 UNS LN_F2_F02_CD4p_Live.fcs	RNy16_aIL10+aPD1_36_UNS	aIL10+aPD1	RNy16	thirty_six	aIL10+aPD1_thirty_six	UNS	F02
1599	Sample_64	6	95	0.0745683	5.5993	5.67153	1.57047	Sample_64	AI_export_Plate 1 UNS LN_F2_F02_CD4p_Live.fcs	RNy16_aIL10+aPD1_36_UNS	aIL10+aPD1	RNy16	thirty_six	aIL10+aPD1_thirty_six	UNS	F02
1600	Sample_64	7	33	0.0259027	19.4056	20.4302	2.64389	Sample_64	AI_export_Plate 1 UNS LN_F2_F02_CD4p_Live.fcs	RNy16_aIL10+aPD1_36_UNS	aIL10+aPD1	RNy16	thirty_six	aIL10+aPD1_thirty_six	UNS	F02
1601	Sample_64	8	36	0.0282575	25.7208	25.8468	0.683504	Sample_64	AI_export_Plate 1 UNS LN_F2_F02_CD4p_Live.fcs	RNy16_aIL10+aPD1_36_UNS	aIL10+aPD1	RNy16	thirty_six	aIL10+aPD1_thirty_six	UNS	F02
1602	Sample_64	9	17	0.0133438	19.5496	23.5609	7.4885	Sample_64	AI_export_Plate 1 UNS LN_F2_F02_CD4p_Live.fcs	RNy16_aIL10+aPD1_36_UNS	aIL10+aPD1	RNy16	thirty_six	aIL10+aPD1_thirty_six	UNS	F02
1603	Sample_65	1	142	0.11146	4.19612	3.75139	3.85142	Sample_65	AI_export_Plate 1 UNS LN_F3_F03_CD4p_Live.fcs	RTd17_Control_36_UNS	Control	RTd17	thirty_six	Control_thirty_six	UNS	F03
1604	Sample_65	10	43	0.033752	15.5541	15.8097	2.04552	Sample_65	AI_export_Plate 1 UNS LN_F3_F03_CD4p_Live.fcs	RTd17_Control_36_UNS	Control	RTd17	thirty_six	Control_thirty_six	UNS	F03
1605	Sample_65	11	26	0.0204082	27.3039	27.5393	0.440488	Sample_65	AI_export_Plate 1 UNS LN_F3_F03_CD4p_Live.fcs	RTd17_Control_36_UNS	Control	RTd17	thirty_six	Control_thirty_six	UNS	F03
1606	Sample_65	12	2	0.00156986	8.58986	8.58986	1.37012	Sample_65	AI_export_Plate 1 UNS LN_F3_F03_CD4p_Live.fcs	RTd17_Control_36_UNS	Control	RTd17	thirty_six	Control_thirty_six	UNS	F03
1607	Sample_65	13	61	0.0478807	17.7266	17.4779	3.22659	Sample_65	AI_export_Plate 1 UNS LN_F3_F03_CD4p_Live.fcs	RTd17_Control_36_UNS	Control	RTd17	thirty_six	Control_thirty_six	UNS	F03
1608	Sample_65	14	0	0	NA	NA	NA	Sample_65	AI_export_Plate 1 UNS LN_F3_F03_CD4p_Live.fcs	RTd17_Control_36_UNS	Control	RTd17	thirty_six	Control_thirty_six	UNS	F03
1609	Sample_65	15	13	0.0102041	NA	NA	NA	Sample_65	AI_export_Plate 1 UNS LN_F3_F03_CD4p_Live.fcs	RTd17_Control_36_UNS	Control	RTd17	thirty_six	Control_thirty_six	UNS	F03
1610	Sample_65	16	51	0.0400314	27.1827	27.3217	0.251911	Sample_65	AI_export_Plate 1 UNS LN_F3_F03_CD4p_Live.fcs	RTd17_Control_36_UNS	Control	RTd17	thirty_six	Control_thirty_six	UNS	F03
1611	Sample_65	17	0	0	NA	NA	NA	Sample_65	AI_export_Plate 1 UNS LN_F3_F03_CD4p_Live.fcs	RTd17_Control_36_UNS	Control	RTd17	thirty_six	Control_thirty_six	UNS	F03
1612	Sample_65	18	1	0.000784929	3.04573	3.04573	NA	Sample_65	AI_export_Plate 1 UNS LN_F3_F03_CD4p_Live.fcs	RTd17_Control_36_UNS	Control	RTd17	thirty_six	Control_thirty_six	UNS	F03
1613	Sample_65	2	107	0.0839874	3.82448	3.28752	1.80745	Sample_65	AI_export_Plate 1 UNS LN_F3_F03_CD4p_Live.fcs	RTd17_Control_36_UNS	Control	RTd17	thirty_six	Control_thirty_six	UNS	F03
1614	Sample_65	3	97	0.0761381	10.3654	9.92002	3.1733	Sample_65	AI_export_Plate 1 UNS LN_F3_F03_CD4p_Live.fcs	RTd17_Control_36_UNS	Control	RTd17	thirty_six	Control_thirty_six	UNS	F03
1615	Sample_65	4	194	0.152276	18.4851	18.5779	1.70757	Sample_65	AI_export_Plate 1 UNS LN_F3_F03_CD4p_Live.fcs	RTd17_Control_36_UNS	Control	RTd17	thirty_six	Control_thirty_six	UNS	F03
1616	Sample_65	5	269	0.211146	23.3088	23.7544	1.44988	Sample_65	AI_export_Plate 1 UNS LN_F3_F03_CD4p_Live.fcs	RTd17_Control_36_UNS	Control	RTd17	thirty_six	Control_thirty_six	UNS	F03
1617	Sample_65	6	47	0.0368917	5.45614	5.64731	1.43646	Sample_65	AI_export_Plate 1 UNS LN_F3_F03_CD4p_Live.fcs	RTd17_Control_36_UNS	Control	RTd17	thirty_six	Control_thirty_six	UNS	F03
1618	Sample_65	7	35	0.0274725	19.129	20.3616	3.84121	Sample_65	AI_export_Plate 1 UNS LN_F3_F03_CD4p_Live.fcs	RTd17_Control_36_UNS	Control	RTd17	thirty_six	Control_thirty_six	UNS	F03
1619	Sample_65	8	130	0.102041	25.6991	25.7465	0.494895	Sample_65	AI_export_Plate 1 UNS LN_F3_F03_CD4p_Live.fcs	RTd17_Control_36_UNS	Control	RTd17	thirty_six	Control_thirty_six	UNS	F03
1620	Sample_65	9	56	0.043956	21.3444	23.5609	5.41337	Sample_65	AI_export_Plate 1 UNS LN_F3_F03_CD4p_Live.fcs	RTd17_Control_36_UNS	Control	RTd17	thirty_six	Control_thirty_six	UNS	F03
1621	Sample_66	1	161	0.126374	3.05725	2.6146	2.42306	Sample_66	AI_export_Plate 1 UNS LN_F4_F04_CD4p_Live.fcs	34897_aIL10_36_UNS	aIL10	34897	thirty_six	aIL10_thirty_six	UNS	F04
1622	Sample_66	10	61	0.0478807	15.0948	15.5245	2.40452	Sample_66	AI_export_Plate 1 UNS LN_F4_F04_CD4p_Live.fcs	34897_aIL10_36_UNS	aIL10	34897	thirty_six	aIL10_thirty_six	UNS	F04
1623	Sample_66	11	21	0.0164835	27.1519	27.557	0.737111	Sample_66	AI_export_Plate 1 UNS LN_F4_F04_CD4p_Live.fcs	34897_aIL10_36_UNS	aIL10	34897	thirty_six	aIL10_thirty_six	UNS	F04
1624	Sample_66	12	9	0.00706436	13.4534	9.61245	7.62595	Sample_66	AI_export_Plate 1 UNS LN_F4_F04_CD4p_Live.fcs	34897_aIL10_36_UNS	aIL10	34897	thirty_six	aIL10_thirty_six	UNS	F04
1625	Sample_66	13	42	0.032967	17.5682	17.4779	3.30941	Sample_66	AI_export_Plate 1 UNS LN_F4_F04_CD4p_Live.fcs	34897_aIL10_36_UNS	aIL10	34897	thirty_six	aIL10_thirty_six	UNS	F04
1626	Sample_66	14	2	0.00156986	27.342	27.342	4.91847e-09	Sample_66	AI_export_Plate 1 UNS LN_F4_F04_CD4p_Live.fcs	34897_aIL10_36_UNS	aIL10	34897	thirty_six	aIL10_thirty_six	UNS	F04
1627	Sample_66	15	12	0.00941915	1.43567	1.43567	NA	Sample_66	AI_export_Plate 1 UNS LN_F4_F04_CD4p_Live.fcs	34897_aIL10_36_UNS	aIL10	34897	thirty_six	aIL10_thirty_six	UNS	F04
1628	Sample_66	16	3	0.00235479	26.8807	26.8158	0.149911	Sample_66	AI_export_Plate 1 UNS LN_F4_F04_CD4p_Live.fcs	34897_aIL10_36_UNS	aIL10	34897	thirty_six	aIL10_thirty_six	UNS	F04
1629	Sample_66	17	0	0	NA	NA	NA	Sample_66	AI_export_Plate 1 UNS LN_F4_F04_CD4p_Live.fcs	34897_aIL10_36_UNS	aIL10	34897	thirty_six	aIL10_thirty_six	UNS	F04
1630	Sample_66	18	1	0.000784929	NA	NA	NA	Sample_66	AI_export_Plate 1 UNS LN_F4_F04_CD4p_Live.fcs	34897_aIL10_36_UNS	aIL10	34897	thirty_six	aIL10_thirty_six	UNS	F04
1631	Sample_66	2	262	0.205651	3.60012	3.22187	2.45257	Sample_66	AI_export_Plate 1 UNS LN_F4_F04_CD4p_Live.fcs	34897_aIL10_36_UNS	aIL10	34897	thirty_six	aIL10_thirty_six	UNS	F04
1632	Sample_66	3	148	0.11617	9.53405	9.67395	2.54717	Sample_66	AI_export_Plate 1 UNS LN_F4_F04_CD4p_Live.fcs	34897_aIL10_36_UNS	aIL10	34897	thirty_six	aIL10_thirty_six	UNS	F04
1633	Sample_66	4	151	0.118524	18.9485	19.0336	2.91887	Sample_66	AI_export_Plate 1 UNS LN_F4_F04_CD4p_Live.fcs	34897_aIL10_36_UNS	aIL10	34897	thirty_six	aIL10_thirty_six	UNS	F04
1634	Sample_66	5	152	0.119309	23.0299	23.5852	2.87568	Sample_66	AI_export_Plate 1 UNS LN_F4_F04_CD4p_Live.fcs	34897_aIL10_36_UNS	aIL10	34897	thirty_six	aIL10_thirty_six	UNS	F04
1635	Sample_66	6	66	0.0518053	5.6041	5.89833	1.45902	Sample_66	AI_export_Plate 1 UNS LN_F4_F04_CD4p_Live.fcs	34897_aIL10_36_UNS	aIL10	34897	thirty_six	aIL10_thirty_six	UNS	F04
1636	Sample_66	7	33	0.0259027	18.9772	20.1127	2.52092	Sample_66	AI_export_Plate 1 UNS LN_F4_F04_CD4p_Live.fcs	34897_aIL10_36_UNS	aIL10	34897	thirty_six	aIL10_thirty_six	UNS	F04
1637	Sample_66	8	77	0.0604396	25.4351	25.7588	2.22257	Sample_66	AI_export_Plate 1 UNS LN_F4_F04_CD4p_Live.fcs	34897_aIL10_36_UNS	aIL10	34897	thirty_six	aIL10_thirty_six	UNS	F04
1638	Sample_66	9	73	0.0572998	19.1717	23.5609	7.31503	Sample_66	AI_export_Plate 1 UNS LN_F4_F04_CD4p_Live.fcs	34897_aIL10_36_UNS	aIL10	34897	thirty_six	aIL10_thirty_six	UNS	F04
1639	Sample_67	1	288	0.22606	3.64302	3.78101	2.36919	Sample_67	AI_export_Plate 1 UNS LN_F5_F05_CD4p_Live.fcs	RRh17_aIL10+aPD1_36_UNS	aIL10+aPD1	RRh17	thirty_six	aIL10+aPD1_thirty_six	UNS	F05
1640	Sample_67	10	129	0.101256	14.9843	14.6196	1.65914	Sample_67	AI_export_Plate 1 UNS LN_F5_F05_CD4p_Live.fcs	RRh17_aIL10+aPD1_36_UNS	aIL10+aPD1	RRh17	thirty_six	aIL10+aPD1_thirty_six	UNS	F05
1641	Sample_67	11	12	0.00941915	26.4416	27.557	3.02927	Sample_67	AI_export_Plate 1 UNS LN_F5_F05_CD4p_Live.fcs	RRh17_aIL10+aPD1_36_UNS	aIL10+aPD1	RRh17	thirty_six	aIL10+aPD1_thirty_six	UNS	F05
1642	Sample_67	12	4	0.00313972	12.9875	9.61087	8.07905	Sample_67	AI_export_Plate 1 UNS LN_F5_F05_CD4p_Live.fcs	RRh17_aIL10+aPD1_36_UNS	aIL10+aPD1	RRh17	thirty_six	aIL10+aPD1_thirty_six	UNS	F05
1643	Sample_67	13	35	0.0274725	17.8005	17.4779	3.52217	Sample_67	AI_export_Plate 1 UNS LN_F5_F05_CD4p_Live.fcs	RRh17_aIL10+aPD1_36_UNS	aIL10+aPD1	RRh17	thirty_six	aIL10+aPD1_thirty_six	UNS	F05
1644	Sample_67	14	0	0	NA	NA	NA	Sample_67	AI_export_Plate 1 UNS LN_F5_F05_CD4p_Live.fcs	RRh17_aIL10+aPD1_36_UNS	aIL10+aPD1	RRh17	thirty_six	aIL10+aPD1_thirty_six	UNS	F05
1645	Sample_67	15	1	0.000784929	NA	NA	NA	Sample_67	AI_export_Plate 1 UNS LN_F5_F05_CD4p_Live.fcs	RRh17_aIL10+aPD1_36_UNS	aIL10+aPD1	RRh17	thirty_six	aIL10+aPD1_thirty_six	UNS	F05
1646	Sample_67	16	0	0	NA	NA	NA	Sample_67	AI_export_Plate 1 UNS LN_F5_F05_CD4p_Live.fcs	RRh17_aIL10+aPD1_36_UNS	aIL10+aPD1	RRh17	thirty_six	aIL10+aPD1_thirty_six	UNS	F05
1647	Sample_67	17	1	0.000784929	6.7543	6.7543	NA	Sample_67	AI_export_Plate 1 UNS LN_F5_F05_CD4p_Live.fcs	RRh17_aIL10+aPD1_36_UNS	aIL10+aPD1	RRh17	thirty_six	aIL10+aPD1_thirty_six	UNS	F05
1648	Sample_67	18	1	0.000784929	3.6239	3.6239	NA	Sample_67	AI_export_Plate 1 UNS LN_F5_F05_CD4p_Live.fcs	RRh17_aIL10+aPD1_36_UNS	aIL10+aPD1	RRh17	thirty_six	aIL10+aPD1_thirty_six	UNS	F05
1649	Sample_67	2	149	0.116954	3.45275	3.04356	2.41078	Sample_67	AI_export_Plate 1 UNS LN_F5_F05_CD4p_Live.fcs	RRh17_aIL10+aPD1_36_UNS	aIL10+aPD1	RRh17	thirty_six	aIL10+aPD1_thirty_six	UNS	F05
1650	Sample_67	3	238	0.186813	9.7802	9.90639	1.89778	Sample_67	AI_export_Plate 1 UNS LN_F5_F05_CD4p_Live.fcs	RRh17_aIL10+aPD1_36_UNS	aIL10+aPD1	RRh17	thirty_six	aIL10+aPD1_thirty_six	UNS	F05
1651	Sample_67	4	130	0.102041	18.5554	19.2912	3.49214	Sample_67	AI_export_Plate 1 UNS LN_F5_F05_CD4p_Live.fcs	RRh17_aIL10+aPD1_36_UNS	aIL10+aPD1	RRh17	thirty_six	aIL10+aPD1_thirty_six	UNS	F05
1652	Sample_67	5	56	0.043956	22.7407	23.0905	1.90793	Sample_67	AI_export_Plate 1 UNS LN_F5_F05_CD4p_Live.fcs	RRh17_aIL10+aPD1_36_UNS	aIL10+aPD1	RRh17	thirty_six	aIL10+aPD1_thirty_six	UNS	F05
1653	Sample_67	6	163	0.127943	5.98078	6.07875	2.08179	Sample_67	AI_export_Plate 1 UNS LN_F5_F05_CD4p_Live.fcs	RRh17_aIL10+aPD1_36_UNS	aIL10+aPD1	RRh17	thirty_six	aIL10+aPD1_thirty_six	UNS	F05
1654	Sample_67	7	30	0.0235479	18.1511	18.2939	3.25654	Sample_67	AI_export_Plate 1 UNS LN_F5_F05_CD4p_Live.fcs	RRh17_aIL10+aPD1_36_UNS	aIL10+aPD1	RRh17	thirty_six	aIL10+aPD1_thirty_six	UNS	F05
1655	Sample_67	8	23	0.0180534	25.4614	25.8105	1.12851	Sample_67	AI_export_Plate 1 UNS LN_F5_F05_CD4p_Live.fcs	RRh17_aIL10+aPD1_36_UNS	aIL10+aPD1	RRh17	thirty_six	aIL10+aPD1_thirty_six	UNS	F05
1656	Sample_67	9	14	0.010989	19.9216	23.4352	6.06623	Sample_67	AI_export_Plate 1 UNS LN_F5_F05_CD4p_Live.fcs	RRh17_aIL10+aPD1_36_UNS	aIL10+aPD1	RRh17	thirty_six	aIL10+aPD1_thirty_six	UNS	F05
1657	Sample_68	1	243	0.190738	2.84618	2.07365	2.92204	Sample_68	AI_export_Plate 1 UNS LN_F6_F06_CD4p_Live.fcs	RFn17_aIL10_36_UNS	aIL10	RFn17	thirty_six	aIL10_thirty_six	UNS	F06
1658	Sample_68	10	27	0.0211931	15.6005	15.7915	2.40522	Sample_68	AI_export_Plate 1 UNS LN_F6_F06_CD4p_Live.fcs	RFn17_aIL10_36_UNS	aIL10	RFn17	thirty_six	aIL10_thirty_six	UNS	F06
1659	Sample_68	11	79	0.0620094	27.3212	27.5054	0.371909	Sample_68	AI_export_Plate 1 UNS LN_F6_F06_CD4p_Live.fcs	RFn17_aIL10_36_UNS	aIL10	RFn17	thirty_six	aIL10_thirty_six	UNS	F06
1660	Sample_68	12	0	0	NA	NA	NA	Sample_68	AI_export_Plate 1 UNS LN_F6_F06_CD4p_Live.fcs	RFn17_aIL10_36_UNS	aIL10	RFn17	thirty_six	aIL10_thirty_six	UNS	F06
1661	Sample_68	13	16	0.0125589	17.8602	17.4779	4.53782	Sample_68	AI_export_Plate 1 UNS LN_F6_F06_CD4p_Live.fcs	RFn17_aIL10_36_UNS	aIL10	RFn17	thirty_six	aIL10_thirty_six	UNS	F06
1662	Sample_68	14	1	0.000784929	27.342	27.342	NA	Sample_68	AI_export_Plate 1 UNS LN_F6_F06_CD4p_Live.fcs	RFn17_aIL10_36_UNS	aIL10	RFn17	thirty_six	aIL10_thirty_six	UNS	F06
1663	Sample_68	15	1	0.000784929	NA	NA	NA	Sample_68	AI_export_Plate 1 UNS LN_F6_F06_CD4p_Live.fcs	RFn17_aIL10_36_UNS	aIL10	RFn17	thirty_six	aIL10_thirty_six	UNS	F06
1664	Sample_68	16	0	0	NA	NA	NA	Sample_68	AI_export_Plate 1 UNS LN_F6_F06_CD4p_Live.fcs	RFn17_aIL10_36_UNS	aIL10	RFn17	thirty_six	aIL10_thirty_six	UNS	F06
1665	Sample_68	17	1	0.000784929	NA	NA	NA	Sample_68	AI_export_Plate 1 UNS LN_F6_F06_CD4p_Live.fcs	RFn17_aIL10_36_UNS	aIL10	RFn17	thirty_six	aIL10_thirty_six	UNS	F06
1666	Sample_68	18	0	0	NA	NA	NA	Sample_68	AI_export_Plate 1 UNS LN_F6_F06_CD4p_Live.fcs	RFn17_aIL10_36_UNS	aIL10	RFn17	thirty_six	aIL10_thirty_six	UNS	F06
1667	Sample_68	2	156	0.122449	3.25505	3.04668	2.11352	Sample_68	AI_export_Plate 1 UNS LN_F6_F06_CD4p_Live.fcs	RFn17_aIL10_36_UNS	aIL10	RFn17	thirty_six	aIL10_thirty_six	UNS	F06
1668	Sample_68	3	85	0.066719	9.20713	9.66866	2.14611	Sample_68	AI_export_Plate 1 UNS LN_F6_F06_CD4p_Live.fcs	RFn17_aIL10_36_UNS	aIL10	RFn17	thirty_six	aIL10_thirty_six	UNS	F06
1669	Sample_68	4	50	0.0392465	18.8626	19.3519	3.77606	Sample_68	AI_export_Plate 1 UNS LN_F6_F06_CD4p_Live.fcs	RFn17_aIL10_36_UNS	aIL10	RFn17	thirty_six	aIL10_thirty_six	UNS	F06
1670	Sample_68	5	86	0.0675039	23.3605	23.8189	2.77704	Sample_68	AI_export_Plate 1 UNS LN_F6_F06_CD4p_Live.fcs	RFn17_aIL10_36_UNS	aIL10	RFn17	thirty_six	aIL10_thirty_six	UNS	F06
1671	Sample_68	6	108	0.0847724	6.0055	6.2704	2.17268	Sample_68	AI_export_Plate 1 UNS LN_F6_F06_CD4p_Live.fcs	RFn17_aIL10_36_UNS	aIL10	RFn17	thirty_six	aIL10_thirty_six	UNS	F06
1672	Sample_68	7	32	0.0251177	19.4931	20.3186	2.6124	Sample_68	AI_export_Plate 1 UNS LN_F6_F06_CD4p_Live.fcs	RFn17_aIL10_36_UNS	aIL10	RFn17	thirty_six	aIL10_thirty_six	UNS	F06
1673	Sample_68	8	363	0.284929	25.096	25.0864	1.92787	Sample_68	AI_export_Plate 1 UNS LN_F6_F06_CD4p_Live.fcs	RFn17_aIL10_36_UNS	aIL10	RFn17	thirty_six	aIL10_thirty_six	UNS	F06
1674	Sample_68	9	26	0.0204082	18.313	23.5609	7.79684	Sample_68	AI_export_Plate 1 UNS LN_F6_F06_CD4p_Live.fcs	RFn17_aIL10_36_UNS	aIL10	RFn17	thirty_six	aIL10_thirty_six	UNS	F06
1675	Sample_69	1	195	0.153061	3.28002	2.96676	2.42178	Sample_69	AI_export_Plate 1 UNS LN_F7_F07_CD4p_Live.fcs	RVm17_aIL10_36_UNS	aIL10	RVm17	thirty_six	aIL10_thirty_six	UNS	F07
1676	Sample_69	10	116	0.0910518	15.1574	15.7307	2.12067	Sample_69	AI_export_Plate 1 UNS LN_F7_F07_CD4p_Live.fcs	RVm17_aIL10_36_UNS	aIL10	RVm17	thirty_six	aIL10_thirty_six	UNS	F07
1677	Sample_69	11	26	0.0204082	27.1365	27.557	1.45023	Sample_69	AI_export_Plate 1 UNS LN_F7_F07_CD4p_Live.fcs	RVm17_aIL10_36_UNS	aIL10	RVm17	thirty_six	aIL10_thirty_six	UNS	F07
1678	Sample_69	12	4	0.00313972	13.0185	9.62818	8.88366	Sample_69	AI_export_Plate 1 UNS LN_F7_F07_CD4p_Live.fcs	RVm17_aIL10_36_UNS	aIL10	RVm17	thirty_six	aIL10_thirty_six	UNS	F07
1679	Sample_69	13	27	0.0211931	17.9882	17.4779	1.22797	Sample_69	AI_export_Plate 1 UNS LN_F7_F07_CD4p_Live.fcs	RVm17_aIL10_36_UNS	aIL10	RVm17	thirty_six	aIL10_thirty_six	UNS	F07
1680	Sample_69	14	0	0	NA	NA	NA	Sample_69	AI_export_Plate 1 UNS LN_F7_F07_CD4p_Live.fcs	RVm17_aIL10_36_UNS	aIL10	RVm17	thirty_six	aIL10_thirty_six	UNS	F07
1681	Sample_69	15	5	0.00392465	NA	NA	NA	Sample_69	AI_export_Plate 1 UNS LN_F7_F07_CD4p_Live.fcs	RVm17_aIL10_36_UNS	aIL10	RVm17	thirty_six	aIL10_thirty_six	UNS	F07
1682	Sample_69	16	0	0	NA	NA	NA	Sample_69	AI_export_Plate 1 UNS LN_F7_F07_CD4p_Live.fcs	RVm17_aIL10_36_UNS	aIL10	RVm17	thirty_six	aIL10_thirty_six	UNS	F07
1683	Sample_69	17	2	0.00156986	NA	NA	NA	Sample_69	AI_export_Plate 1 UNS LN_F7_F07_CD4p_Live.fcs	RVm17_aIL10_36_UNS	aIL10	RVm17	thirty_six	aIL10_thirty_six	UNS	F07
1684	Sample_69	18	0	0	NA	NA	NA	Sample_69	AI_export_Plate 1 UNS LN_F7_F07_CD4p_Live.fcs	RVm17_aIL10_36_UNS	aIL10	RVm17	thirty_six	aIL10_thirty_six	UNS	F07
1685	Sample_69	2	246	0.193093	3.72328	3.31359	2.54386	Sample_69	AI_export_Plate 1 UNS LN_F7_F07_CD4p_Live.fcs	RVm17_aIL10_36_UNS	aIL10	RVm17	thirty_six	aIL10_thirty_six	UNS	F07
1686	Sample_69	3	204	0.160126	9.65503	9.67218	2.38116	Sample_69	AI_export_Plate 1 UNS LN_F7_F07_CD4p_Live.fcs	RVm17_aIL10_36_UNS	aIL10	RVm17	thirty_six	aIL10_thirty_six	UNS	F07
1687	Sample_69	4	112	0.0879121	18.9883	19.1611	3.5148	Sample_69	AI_export_Plate 1 UNS LN_F7_F07_CD4p_Live.fcs	RVm17_aIL10_36_UNS	aIL10	RVm17	thirty_six	aIL10_thirty_six	UNS	F07
1688	Sample_69	5	79	0.0620094	23.1061	23.1303	0.819506	Sample_69	AI_export_Plate 1 UNS LN_F7_F07_CD4p_Live.fcs	RVm17_aIL10_36_UNS	aIL10	RVm17	thirty_six	aIL10_thirty_six	UNS	F07
1689	Sample_69	6	107	0.0839874	5.83979	6.14729	1.39574	Sample_69	AI_export_Plate 1 UNS LN_F7_F07_CD4p_Live.fcs	RVm17_aIL10_36_UNS	aIL10	RVm17	thirty_six	aIL10_thirty_six	UNS	F07
1690	Sample_69	7	52	0.0408163	18.4087	18.2672	3.10221	Sample_69	AI_export_Plate 1 UNS LN_F7_F07_CD4p_Live.fcs	RVm17_aIL10_36_UNS	aIL10	RVm17	thirty_six	aIL10_thirty_six	UNS	F07
1691	Sample_69	8	58	0.0455259	25.4493	25.3922	0.538167	Sample_69	AI_export_Plate 1 UNS LN_F7_F07_CD4p_Live.fcs	RVm17_aIL10_36_UNS	aIL10	RVm17	thirty_six	aIL10_thirty_six	UNS	F07
1692	Sample_69	9	41	0.0321821	20.5685	23.5609	5.92447	Sample_69	AI_export_Plate 1 UNS LN_F7_F07_CD4p_Live.fcs	RVm17_aIL10_36_UNS	aIL10	RVm17	thirty_six	aIL10_thirty_six	UNS	F07
1693	Sample_7	1	174	0.136578	4.11357	4.35216	2.06965	Sample_7	AI_export_Plate 1 UNS LN_A4_A04_CD4p_Live.fcs	RYm17_aIL10+aPD1_-1_UNS	aIL10+aPD1	RYm17	minus_one	aIL10+aPD1_minus_one	UNS	A04
1694	Sample_7	10	289	0.226845	15.2144	15.4656	1.58147	Sample_7	AI_export_Plate 1 UNS LN_A4_A04_CD4p_Live.fcs	RYm17_aIL10+aPD1_-1_UNS	aIL10+aPD1	RYm17	minus_one	aIL10+aPD1_minus_one	UNS	A04
1695	Sample_7	11	7	0.00549451	27.2652	27.557	0.552954	Sample_7	AI_export_Plate 1 UNS LN_A4_A04_CD4p_Live.fcs	RYm17_aIL10+aPD1_-1_UNS	aIL10+aPD1	RYm17	minus_one	aIL10+aPD1_minus_one	UNS	A04
1696	Sample_7	12	6	0.00470958	8.30029	8.72803	1.54315	Sample_7	AI_export_Plate 1 UNS LN_A4_A04_CD4p_Live.fcs	RYm17_aIL10+aPD1_-1_UNS	aIL10+aPD1	RYm17	minus_one	aIL10+aPD1_minus_one	UNS	A04
1697	Sample_7	13	15	0.0117739	17.2871	17.4779	3.90497	Sample_7	AI_export_Plate 1 UNS LN_A4_A04_CD4p_Live.fcs	RYm17_aIL10+aPD1_-1_UNS	aIL10+aPD1	RYm17	minus_one	aIL10+aPD1_minus_one	UNS	A04
1698	Sample_7	14	0	0	NA	NA	NA	Sample_7	AI_export_Plate 1 UNS LN_A4_A04_CD4p_Live.fcs	RYm17_aIL10+aPD1_-1_UNS	aIL10+aPD1	RYm17	minus_one	aIL10+aPD1_minus_one	UNS	A04
1699	Sample_7	15	0	0	NA	NA	NA	Sample_7	AI_export_Plate 1 UNS LN_A4_A04_CD4p_Live.fcs	RYm17_aIL10+aPD1_-1_UNS	aIL10+aPD1	RYm17	minus_one	aIL10+aPD1_minus_one	UNS	A04
1700	Sample_7	16	1	0.000784929	27.342	27.342	NA	Sample_7	AI_export_Plate 1 UNS LN_A4_A04_CD4p_Live.fcs	RYm17_aIL10+aPD1_-1_UNS	aIL10+aPD1	RYm17	minus_one	aIL10+aPD1_minus_one	UNS	A04
1701	Sample_7	17	0	0	NA	NA	NA	Sample_7	AI_export_Plate 1 UNS LN_A4_A04_CD4p_Live.fcs	RYm17_aIL10+aPD1_-1_UNS	aIL10+aPD1	RYm17	minus_one	aIL10+aPD1_minus_one	UNS	A04
1702	Sample_7	18	2	0.00156986	3.60686	3.60686	0.00313983	Sample_7	AI_export_Plate 1 UNS LN_A4_A04_CD4p_Live.fcs	RYm17_aIL10+aPD1_-1_UNS	aIL10+aPD1	RYm17	minus_one	aIL10+aPD1_minus_one	UNS	A04
1703	Sample_7	2	146	0.1146	3.79606	3.47299	2.14276	Sample_7	AI_export_Plate 1 UNS LN_A4_A04_CD4p_Live.fcs	RYm17_aIL10+aPD1_-1_UNS	aIL10+aPD1	RYm17	minus_one	aIL10+aPD1_minus_one	UNS	A04
1704	Sample_7	3	211	0.16562	9.66905	9.75211	2.26767	Sample_7	AI_export_Plate 1 UNS LN_A4_A04_CD4p_Live.fcs	RYm17_aIL10+aPD1_-1_UNS	aIL10+aPD1	RYm17	minus_one	aIL10+aPD1_minus_one	UNS	A04
1705	Sample_7	4	128	0.100471	19.3747	19.3145	3.45041	Sample_7	AI_export_Plate 1 UNS LN_A4_A04_CD4p_Live.fcs	RYm17_aIL10+aPD1_-1_UNS	aIL10+aPD1	RYm17	minus_one	aIL10+aPD1_minus_one	UNS	A04
1706	Sample_7	5	95	0.0745683	22.3879	22.4813	1.87402	Sample_7	AI_export_Plate 1 UNS LN_A4_A04_CD4p_Live.fcs	RYm17_aIL10+aPD1_-1_UNS	aIL10+aPD1	RYm17	minus_one	aIL10+aPD1_minus_one	UNS	A04
1707	Sample_7	6	128	0.100471	5.57567	5.55018	1.96492	Sample_7	AI_export_Plate 1 UNS LN_A4_A04_CD4p_Live.fcs	RYm17_aIL10+aPD1_-1_UNS	aIL10+aPD1	RYm17	minus_one	aIL10+aPD1_minus_one	UNS	A04
1708	Sample_7	7	48	0.0376766	17.7926	20.2534	4.81593	Sample_7	AI_export_Plate 1 UNS LN_A4_A04_CD4p_Live.fcs	RYm17_aIL10+aPD1_-1_UNS	aIL10+aPD1	RYm17	minus_one	aIL10+aPD1_minus_one	UNS	A04
1709	Sample_7	8	11	0.00863422	25.8537	26.0925	0.522235	Sample_7	AI_export_Plate 1 UNS LN_A4_A04_CD4p_Live.fcs	RYm17_aIL10+aPD1_-1_UNS	aIL10+aPD1	RYm17	minus_one	aIL10+aPD1_minus_one	UNS	A04
1710	Sample_7	9	13	0.0102041	17.9006	23.5609	7.57598	Sample_7	AI_export_Plate 1 UNS LN_A4_A04_CD4p_Live.fcs	RYm17_aIL10+aPD1_-1_UNS	aIL10+aPD1	RYm17	minus_one	aIL10+aPD1_minus_one	UNS	A04
1711	Sample_70	1	155	0.121664	3.80926	3.88567	2.32256	Sample_70	AI_export_Plate 1 UNS LN_F8_F08_CD4p_Live.fcs	RBe17_Control_36_UNS	Control	RBe17	thirty_six	Control_thirty_six	UNS	F08
1712	Sample_70	10	53	0.0416013	14.5	14.442	1.8421	Sample_70	AI_export_Plate 1 UNS LN_F8_F08_CD4p_Live.fcs	RBe17_Control_36_UNS	Control	RBe17	thirty_six	Control_thirty_six	UNS	F08
1713	Sample_70	11	34	0.0266876	26.7555	27.557	3.61756	Sample_70	AI_export_Plate 1 UNS LN_F8_F08_CD4p_Live.fcs	RBe17_Control_36_UNS	Control	RBe17	thirty_six	Control_thirty_six	UNS	F08
1714	Sample_70	12	6	0.00470958	8.6036	9.61244	1.42849	Sample_70	AI_export_Plate 1 UNS LN_F8_F08_CD4p_Live.fcs	RBe17_Control_36_UNS	Control	RBe17	thirty_six	Control_thirty_six	UNS	F08
1715	Sample_70	13	24	0.0188383	18.0005	17.4779	4.47113	Sample_70	AI_export_Plate 1 UNS LN_F8_F08_CD4p_Live.fcs	RBe17_Control_36_UNS	Control	RBe17	thirty_six	Control_thirty_six	UNS	F08
1716	Sample_70	14	0	0	NA	NA	NA	Sample_70	AI_export_Plate 1 UNS LN_F8_F08_CD4p_Live.fcs	RBe17_Control_36_UNS	Control	RBe17	thirty_six	Control_thirty_six	UNS	F08
1717	Sample_70	15	4	0.00313972	NA	NA	NA	Sample_70	AI_export_Plate 1 UNS LN_F8_F08_CD4p_Live.fcs	RBe17_Control_36_UNS	Control	RBe17	thirty_six	Control_thirty_six	UNS	F08
1718	Sample_70	16	1	0.000784929	27.3189	27.3189	NA	Sample_70	AI_export_Plate 1 UNS LN_F8_F08_CD4p_Live.fcs	RBe17_Control_36_UNS	Control	RBe17	thirty_six	Control_thirty_six	UNS	F08
1719	Sample_70	17	0	0	NA	NA	NA	Sample_70	AI_export_Plate 1 UNS LN_F8_F08_CD4p_Live.fcs	RBe17_Control_36_UNS	Control	RBe17	thirty_six	Control_thirty_six	UNS	F08
1720	Sample_70	18	0	0	NA	NA	NA	Sample_70	AI_export_Plate 1 UNS LN_F8_F08_CD4p_Live.fcs	RBe17_Control_36_UNS	Control	RBe17	thirty_six	Control_thirty_six	UNS	F08
1721	Sample_70	2	321	0.251962	4.03511	3.63783	2.33972	Sample_70	AI_export_Plate 1 UNS LN_F8_F08_CD4p_Live.fcs	RBe17_Control_36_UNS	Control	RBe17	thirty_six	Control_thirty_six	UNS	F08
1722	Sample_70	3	165	0.129513	9.36327	9.51745	1.93583	Sample_70	AI_export_Plate 1 UNS LN_F8_F08_CD4p_Live.fcs	RBe17_Control_36_UNS	Control	RBe17	thirty_six	Control_thirty_six	UNS	F08
1723	Sample_70	4	99	0.077708	18.6476	19.1812	4.13814	Sample_70	AI_export_Plate 1 UNS LN_F8_F08_CD4p_Live.fcs	RBe17_Control_36_UNS	Control	RBe17	thirty_six	Control_thirty_six	UNS	F08
1724	Sample_70	5	84	0.0659341	23.1876	23.5653	1.92416	Sample_70	AI_export_Plate 1 UNS LN_F8_F08_CD4p_Live.fcs	RBe17_Control_36_UNS	Control	RBe17	thirty_six	Control_thirty_six	UNS	F08
1725	Sample_70	6	160	0.125589	5.92467	6.16927	1.21938	Sample_70	AI_export_Plate 1 UNS LN_F8_F08_CD4p_Live.fcs	RBe17_Control_36_UNS	Control	RBe17	thirty_six	Control_thirty_six	UNS	F08
1726	Sample_70	7	66	0.0518053	20.0711	20.4294	1.37213	Sample_70	AI_export_Plate 1 UNS LN_F8_F08_CD4p_Live.fcs	RBe17_Control_36_UNS	Control	RBe17	thirty_six	Control_thirty_six	UNS	F08
1727	Sample_70	8	67	0.0525903	25.6406	25.7401	0.597478	Sample_70	AI_export_Plate 1 UNS LN_F8_F08_CD4p_Live.fcs	RBe17_Control_36_UNS	Control	RBe17	thirty_six	Control_thirty_six	UNS	F08
1728	Sample_70	9	35	0.0274725	21.5807	23.5609	5.25372	Sample_70	AI_export_Plate 1 UNS LN_F8_F08_CD4p_Live.fcs	RBe17_Control_36_UNS	Control	RBe17	thirty_six	Control_thirty_six	UNS	F08
1729	Sample_71	1	307	0.240973	3.43736	3.04836	2.50118	Sample_71	AI_export_Plate 1 UNS LN_F9_F09_CD4p_Live.fcs	RMl17_Control_36_UNS	Control	RMl17	thirty_six	Control_thirty_six	UNS	F09
1730	Sample_71	10	97	0.0761381	14.6498	14.6009	1.71779	Sample_71	AI_export_Plate 1 UNS LN_F9_F09_CD4p_Live.fcs	RMl17_Control_36_UNS	Control	RMl17	thirty_six	Control_thirty_six	UNS	F09
1731	Sample_71	11	13	0.0102041	27.3501	27.4686	0.304833	Sample_71	AI_export_Plate 1 UNS LN_F9_F09_CD4p_Live.fcs	RMl17_Control_36_UNS	Control	RMl17	thirty_six	Control_thirty_six	UNS	F09
1732	Sample_71	12	8	0.00627943	9.3551	9.59808	0.650798	Sample_71	AI_export_Plate 1 UNS LN_F9_F09_CD4p_Live.fcs	RMl17_Control_36_UNS	Control	RMl17	thirty_six	Control_thirty_six	UNS	F09
1733	Sample_71	13	12	0.00941915	19.3202	17.4779	2.76227	Sample_71	AI_export_Plate 1 UNS LN_F9_F09_CD4p_Live.fcs	RMl17_Control_36_UNS	Control	RMl17	thirty_six	Control_thirty_six	UNS	F09
1734	Sample_71	14	2	0.00156986	27.342	27.342	4.91847e-09	Sample_71	AI_export_Plate 1 UNS LN_F9_F09_CD4p_Live.fcs	RMl17_Control_36_UNS	Control	RMl17	thirty_six	Control_thirty_six	UNS	F09
1735	Sample_71	15	2	0.00156986	NA	NA	NA	Sample_71	AI_export_Plate 1 UNS LN_F9_F09_CD4p_Live.fcs	RMl17_Control_36_UNS	Control	RMl17	thirty_six	Control_thirty_six	UNS	F09
1736	Sample_71	16	0	0	NA	NA	NA	Sample_71	AI_export_Plate 1 UNS LN_F9_F09_CD4p_Live.fcs	RMl17_Control_36_UNS	Control	RMl17	thirty_six	Control_thirty_six	UNS	F09
1737	Sample_71	17	0	0	NA	NA	NA	Sample_71	AI_export_Plate 1 UNS LN_F9_F09_CD4p_Live.fcs	RMl17_Control_36_UNS	Control	RMl17	thirty_six	Control_thirty_six	UNS	F09
1738	Sample_71	18	0	0	NA	NA	NA	Sample_71	AI_export_Plate 1 UNS LN_F9_F09_CD4p_Live.fcs	RMl17_Control_36_UNS	Control	RMl17	thirty_six	Control_thirty_six	UNS	F09
1739	Sample_71	2	303	0.237834	3.22538	2.99674	2.19875	Sample_71	AI_export_Plate 1 UNS LN_F9_F09_CD4p_Live.fcs	RMl17_Control_36_UNS	Control	RMl17	thirty_six	Control_thirty_six	UNS	F09
1740	Sample_71	3	99	0.077708	9.58215	9.87928	1.75072	Sample_71	AI_export_Plate 1 UNS LN_F9_F09_CD4p_Live.fcs	RMl17_Control_36_UNS	Control	RMl17	thirty_six	Control_thirty_six	UNS	F09
1741	Sample_71	4	120	0.0941915	19.4313	19.918	3.5348	Sample_71	AI_export_Plate 1 UNS LN_F9_F09_CD4p_Live.fcs	RMl17_Control_36_UNS	Control	RMl17	thirty_six	Control_thirty_six	UNS	F09
1742	Sample_71	5	51	0.0400314	23.2022	23.3626	0.863569	Sample_71	AI_export_Plate 1 UNS LN_F9_F09_CD4p_Live.fcs	RMl17_Control_36_UNS	Control	RMl17	thirty_six	Control_thirty_six	UNS	F09
1743	Sample_71	6	175	0.137363	6.27062	6.36762	2.14855	Sample_71	AI_export_Plate 1 UNS LN_F9_F09_CD4p_Live.fcs	RMl17_Control_36_UNS	Control	RMl17	thirty_six	Control_thirty_six	UNS	F09
1744	Sample_71	7	37	0.0290424	18.381	17.8849	2.16183	Sample_71	AI_export_Plate 1 UNS LN_F9_F09_CD4p_Live.fcs	RMl17_Control_36_UNS	Control	RMl17	thirty_six	Control_thirty_six	UNS	F09
1745	Sample_71	8	29	0.022763	25.0873	25.7374	3.01956	Sample_71	AI_export_Plate 1 UNS LN_F9_F09_CD4p_Live.fcs	RMl17_Control_36_UNS	Control	RMl17	thirty_six	Control_thirty_six	UNS	F09
1746	Sample_71	9	19	0.0149137	20.7575	23.5609	6.08412	Sample_71	AI_export_Plate 1 UNS LN_F9_F09_CD4p_Live.fcs	RMl17_Control_36_UNS	Control	RMl17	thirty_six	Control_thirty_six	UNS	F09
1747	Sample_72	1	274	0.215071	2.99023	2.39434	2.61498	Sample_72	AI_export_Plate 1 UNS LN_G1_G01_CD4p_Live.fcs	RBv17_aIL10+aPD1_-1_UNS	aIL10+aPD1	RBv17	minus_one	aIL10+aPD1_minus_one	UNS	G01
1748	Sample_72	10	152	0.119309	15.0535	15.229	1.80638	Sample_72	AI_export_Plate 1 UNS LN_G1_G01_CD4p_Live.fcs	RBv17_aIL10+aPD1_-1_UNS	aIL10+aPD1	RBv17	minus_one	aIL10+aPD1_minus_one	UNS	G01
1749	Sample_72	11	9	0.00706436	27.3973	27.557	0.34644	Sample_72	AI_export_Plate 1 UNS LN_G1_G01_CD4p_Live.fcs	RBv17_aIL10+aPD1_-1_UNS	aIL10+aPD1	RBv17	minus_one	aIL10+aPD1_minus_one	UNS	G01
1750	Sample_72	12	9	0.00706436	11.4811	9.61245	6.03942	Sample_72	AI_export_Plate 1 UNS LN_G1_G01_CD4p_Live.fcs	RBv17_aIL10+aPD1_-1_UNS	aIL10+aPD1	RBv17	minus_one	aIL10+aPD1_minus_one	UNS	G01
1751	Sample_72	13	16	0.0125589	17.7692	17.4779	3.66971	Sample_72	AI_export_Plate 1 UNS LN_G1_G01_CD4p_Live.fcs	RBv17_aIL10+aPD1_-1_UNS	aIL10+aPD1	RBv17	minus_one	aIL10+aPD1_minus_one	UNS	G01
1752	Sample_72	14	5	0.00392465	27.342	27.342	1.0998e-08	Sample_72	AI_export_Plate 1 UNS LN_G1_G01_CD4p_Live.fcs	RBv17_aIL10+aPD1_-1_UNS	aIL10+aPD1	RBv17	minus_one	aIL10+aPD1_minus_one	UNS	G01
1753	Sample_72	15	0	0	NA	NA	NA	Sample_72	AI_export_Plate 1 UNS LN_G1_G01_CD4p_Live.fcs	RBv17_aIL10+aPD1_-1_UNS	aIL10+aPD1	RBv17	minus_one	aIL10+aPD1_minus_one	UNS	G01
1754	Sample_72	16	1	0.000784929	26.7726	26.7726	NA	Sample_72	AI_export_Plate 1 UNS LN_G1_G01_CD4p_Live.fcs	RBv17_aIL10+aPD1_-1_UNS	aIL10+aPD1	RBv17	minus_one	aIL10+aPD1_minus_one	UNS	G01
1755	Sample_72	17	4	0.00313972	10.4851	10.4851	NA	Sample_72	AI_export_Plate 1 UNS LN_G1_G01_CD4p_Live.fcs	RBv17_aIL10+aPD1_-1_UNS	aIL10+aPD1	RBv17	minus_one	aIL10+aPD1_minus_one	UNS	G01
1756	Sample_72	18	1	0.000784929	3.60438	3.60438	NA	Sample_72	AI_export_Plate 1 UNS LN_G1_G01_CD4p_Live.fcs	RBv17_aIL10+aPD1_-1_UNS	aIL10+aPD1	RBv17	minus_one	aIL10+aPD1_minus_one	UNS	G01
1757	Sample_72	2	281	0.220565	3.49506	3.16059	2.2411	Sample_72	AI_export_Plate 1 UNS LN_G1_G01_CD4p_Live.fcs	RBv17_aIL10+aPD1_-1_UNS	aIL10+aPD1	RBv17	minus_one	aIL10+aPD1_minus_one	UNS	G01
1758	Sample_72	3	235	0.184458	9.62886	9.63246	2.4169	Sample_72	AI_export_Plate 1 UNS LN_G1_G01_CD4p_Live.fcs	RBv17_aIL10+aPD1_-1_UNS	aIL10+aPD1	RBv17	minus_one	aIL10+aPD1_minus_one	UNS	G01
1759	Sample_72	4	83	0.0651491	18.7836	19.2436	3.57833	Sample_72	AI_export_Plate 1 UNS LN_G1_G01_CD4p_Live.fcs	RBv17_aIL10+aPD1_-1_UNS	aIL10+aPD1	RBv17	minus_one	aIL10+aPD1_minus_one	UNS	G01
1760	Sample_72	5	90	0.0706436	22.4127	22.7198	3.27439	Sample_72	AI_export_Plate 1 UNS LN_G1_G01_CD4p_Live.fcs	RBv17_aIL10+aPD1_-1_UNS	aIL10+aPD1	RBv17	minus_one	aIL10+aPD1_minus_one	UNS	G01
1761	Sample_72	6	77	0.0604396	5.23399	5.63133	1.66706	Sample_72	AI_export_Plate 1 UNS LN_G1_G01_CD4p_Live.fcs	RBv17_aIL10+aPD1_-1_UNS	aIL10+aPD1	RBv17	minus_one	aIL10+aPD1_minus_one	UNS	G01
1762	Sample_72	7	15	0.0117739	17.2684	18.4562	5.95571	Sample_72	AI_export_Plate 1 UNS LN_G1_G01_CD4p_Live.fcs	RBv17_aIL10+aPD1_-1_UNS	aIL10+aPD1	RBv17	minus_one	aIL10+aPD1_minus_one	UNS	G01
1763	Sample_72	8	14	0.010989	25.3667	25.558	0.629923	Sample_72	AI_export_Plate 1 UNS LN_G1_G01_CD4p_Live.fcs	RBv17_aIL10+aPD1_-1_UNS	aIL10+aPD1	RBv17	minus_one	aIL10+aPD1_minus_one	UNS	G01
1764	Sample_72	9	8	0.00627943	16.4091	23.3095	8.84397	Sample_72	AI_export_Plate 1 UNS LN_G1_G01_CD4p_Live.fcs	RBv17_aIL10+aPD1_-1_UNS	aIL10+aPD1	RBv17	minus_one	aIL10+aPD1_minus_one	UNS	G01
1765	Sample_73	1	219	0.1719	3.44071	3.1459	2.37416	Sample_73	AI_export_Plate 1 UNS LN_G10_G10_CD4p_Live.fcs	RVi17_Control_-1_UNS	Control	RVi17	minus_one	Control_minus_one	UNS	G10
1766	Sample_73	10	149	0.116954	14.7475	15.2066	2.15899	Sample_73	AI_export_Plate 1 UNS LN_G10_G10_CD4p_Live.fcs	RVi17_Control_-1_UNS	Control	RVi17	minus_one	Control_minus_one	UNS	G10
1767	Sample_73	11	10	0.00784929	27.4935	27.557	0.132855	Sample_73	AI_export_Plate 1 UNS LN_G10_G10_CD4p_Live.fcs	RVi17_Control_-1_UNS	Control	RVi17	minus_one	Control_minus_one	UNS	G10
1768	Sample_73	12	15	0.0117739	9.25488	9.61245	0.685418	Sample_73	AI_export_Plate 1 UNS LN_G10_G10_CD4p_Live.fcs	RVi17_Control_-1_UNS	Control	RVi17	minus_one	Control_minus_one	UNS	G10
1769	Sample_73	13	11	0.00863422	16.4119	17.4779	3.53226	Sample_73	AI_export_Plate 1 UNS LN_G10_G10_CD4p_Live.fcs	RVi17_Control_-1_UNS	Control	RVi17	minus_one	Control_minus_one	UNS	G10
1770	Sample_73	14	1	0.000784929	27.342	27.342	NA	Sample_73	AI_export_Plate 1 UNS LN_G10_G10_CD4p_Live.fcs	RVi17_Control_-1_UNS	Control	RVi17	minus_one	Control_minus_one	UNS	G10
1771	Sample_73	15	3	0.00235479	NA	NA	NA	Sample_73	AI_export_Plate 1 UNS LN_G10_G10_CD4p_Live.fcs	RVi17_Control_-1_UNS	Control	RVi17	minus_one	Control_minus_one	UNS	G10
1772	Sample_73	16	0	0	NA	NA	NA	Sample_73	AI_export_Plate 1 UNS LN_G10_G10_CD4p_Live.fcs	RVi17_Control_-1_UNS	Control	RVi17	minus_one	Control_minus_one	UNS	G10
1773	Sample_73	17	0	0	NA	NA	NA	Sample_73	AI_export_Plate 1 UNS LN_G10_G10_CD4p_Live.fcs	RVi17_Control_-1_UNS	Control	RVi17	minus_one	Control_minus_one	UNS	G10
1774	Sample_73	18	0	0	NA	NA	NA	Sample_73	AI_export_Plate 1 UNS LN_G10_G10_CD4p_Live.fcs	RVi17_Control_-1_UNS	Control	RVi17	minus_one	Control_minus_one	UNS	G10
1775	Sample_73	2	305	0.239403	3.24281	3.11562	1.51759	Sample_73	AI_export_Plate 1 UNS LN_G10_G10_CD4p_Live.fcs	RVi17_Control_-1_UNS	Control	RVi17	minus_one	Control_minus_one	UNS	G10
1776	Sample_73	3	225	0.176609	9.62564	9.70349	1.8603	Sample_73	AI_export_Plate 1 UNS LN_G10_G10_CD4p_Live.fcs	RVi17_Control_-1_UNS	Control	RVi17	minus_one	Control_minus_one	UNS	G10
1777	Sample_73	4	108	0.0847724	18.3767	19.2912	3.79145	Sample_73	AI_export_Plate 1 UNS LN_G10_G10_CD4p_Live.fcs	RVi17_Control_-1_UNS	Control	RVi17	minus_one	Control_minus_one	UNS	G10
1778	Sample_73	5	61	0.0478807	22.2225	22.7177	3.70937	Sample_73	AI_export_Plate 1 UNS LN_G10_G10_CD4p_Live.fcs	RVi17_Control_-1_UNS	Control	RVi17	minus_one	Control_minus_one	UNS	G10
1779	Sample_73	6	109	0.0855573	5.82866	6.13118	1.02975	Sample_73	AI_export_Plate 1 UNS LN_G10_G10_CD4p_Live.fcs	RVi17_Control_-1_UNS	Control	RVi17	minus_one	Control_minus_one	UNS	G10
1780	Sample_73	7	35	0.0274725	19.2306	18.2873	1.97056	Sample_73	AI_export_Plate 1 UNS LN_G10_G10_CD4p_Live.fcs	RVi17_Control_-1_UNS	Control	RVi17	minus_one	Control_minus_one	UNS	G10
1781	Sample_73	8	11	0.00863422	25.6312	25.5048	0.470549	Sample_73	AI_export_Plate 1 UNS LN_G10_G10_CD4p_Live.fcs	RVi17_Control_-1_UNS	Control	RVi17	minus_one	Control_minus_one	UNS	G10
1782	Sample_73	9	12	0.00941915	17.9107	23.4316	8.00385	Sample_73	AI_export_Plate 1 UNS LN_G10_G10_CD4p_Live.fcs	RVi17_Control_-1_UNS	Control	RVi17	minus_one	Control_minus_one	UNS	G10
1783	Sample_74	1	245	0.192308	3.13018	2.53445	2.72198	Sample_74	AI_export_Plate 1 UNS LN_G11_G11_CD4p_Live.fcs	RWs17_aIL10+aPD1_-1_UNS	aIL10+aPD1	RWs17	minus_one	aIL10+aPD1_minus_one	UNS	G11
1784	Sample_74	10	143	0.112245	14.9307	15.1148	2.21795	Sample_74	AI_export_Plate 1 UNS LN_G11_G11_CD4p_Live.fcs	RWs17_aIL10+aPD1_-1_UNS	aIL10+aPD1	RWs17	minus_one	aIL10+aPD1_minus_one	UNS	G11
1785	Sample_74	11	13	0.0102041	26.7411	27.557	2.78504	Sample_74	AI_export_Plate 1 UNS LN_G11_G11_CD4p_Live.fcs	RWs17_aIL10+aPD1_-1_UNS	aIL10+aPD1	RWs17	minus_one	aIL10+aPD1_minus_one	UNS	G11
1786	Sample_74	12	21	0.0164835	9.12358	9.60825	0.906678	Sample_74	AI_export_Plate 1 UNS LN_G11_G11_CD4p_Live.fcs	RWs17_aIL10+aPD1_-1_UNS	aIL10+aPD1	RWs17	minus_one	aIL10+aPD1_minus_one	UNS	G11
1787	Sample_74	13	20	0.0156986	16.7838	17.4779	5.57919	Sample_74	AI_export_Plate 1 UNS LN_G11_G11_CD4p_Live.fcs	RWs17_aIL10+aPD1_-1_UNS	aIL10+aPD1	RWs17	minus_one	aIL10+aPD1_minus_one	UNS	G11
1788	Sample_74	14	0	0	NA	NA	NA	Sample_74	AI_export_Plate 1 UNS LN_G11_G11_CD4p_Live.fcs	RWs17_aIL10+aPD1_-1_UNS	aIL10+aPD1	RWs17	minus_one	aIL10+aPD1_minus_one	UNS	G11
1789	Sample_74	15	0	0	NA	NA	NA	Sample_74	AI_export_Plate 1 UNS LN_G11_G11_CD4p_Live.fcs	RWs17_aIL10+aPD1_-1_UNS	aIL10+aPD1	RWs17	minus_one	aIL10+aPD1_minus_one	UNS	G11
1790	Sample_74	16	1	0.000784929	27.2801	27.2801	NA	Sample_74	AI_export_Plate 1 UNS LN_G11_G11_CD4p_Live.fcs	RWs17_aIL10+aPD1_-1_UNS	aIL10+aPD1	RWs17	minus_one	aIL10+aPD1_minus_one	UNS	G11
1791	Sample_74	17	0	0	NA	NA	NA	Sample_74	AI_export_Plate 1 UNS LN_G11_G11_CD4p_Live.fcs	RWs17_aIL10+aPD1_-1_UNS	aIL10+aPD1	RWs17	minus_one	aIL10+aPD1_minus_one	UNS	G11
1792	Sample_74	18	1	0.000784929	3.56722	3.56722	NA	Sample_74	AI_export_Plate 1 UNS LN_G11_G11_CD4p_Live.fcs	RWs17_aIL10+aPD1_-1_UNS	aIL10+aPD1	RWs17	minus_one	aIL10+aPD1_minus_one	UNS	G11
1793	Sample_74	2	345	0.270801	2.99335	2.86131	1.68881	Sample_74	AI_export_Plate 1 UNS LN_G11_G11_CD4p_Live.fcs	RWs17_aIL10+aPD1_-1_UNS	aIL10+aPD1	RWs17	minus_one	aIL10+aPD1_minus_one	UNS	G11
1794	Sample_74	3	193	0.151491	9.59893	9.87219	2.23268	Sample_74	AI_export_Plate 1 UNS LN_G11_G11_CD4p_Live.fcs	RWs17_aIL10+aPD1_-1_UNS	aIL10+aPD1	RWs17	minus_one	aIL10+aPD1_minus_one	UNS	G11
1795	Sample_74	4	106	0.0832025	17.3508	18.6301	5.0245	Sample_74	AI_export_Plate 1 UNS LN_G11_G11_CD4p_Live.fcs	RWs17_aIL10+aPD1_-1_UNS	aIL10+aPD1	RWs17	minus_one	aIL10+aPD1_minus_one	UNS	G11
1796	Sample_74	5	66	0.0518053	22.9539	22.758	0.710137	Sample_74	AI_export_Plate 1 UNS LN_G11_G11_CD4p_Live.fcs	RWs17_aIL10+aPD1_-1_UNS	aIL10+aPD1	RWs17	minus_one	aIL10+aPD1_minus_one	UNS	G11
1797	Sample_74	6	72	0.0565149	5.97691	6.08628	2.28569	Sample_74	AI_export_Plate 1 UNS LN_G11_G11_CD4p_Live.fcs	RWs17_aIL10+aPD1_-1_UNS	aIL10+aPD1	RWs17	minus_one	aIL10+aPD1_minus_one	UNS	G11
1798	Sample_74	7	30	0.0235479	18.0979	18.0812	3.57421	Sample_74	AI_export_Plate 1 UNS LN_G11_G11_CD4p_Live.fcs	RWs17_aIL10+aPD1_-1_UNS	aIL10+aPD1	RWs17	minus_one	aIL10+aPD1_minus_one	UNS	G11
1799	Sample_74	8	6	0.00470958	25.5051	25.7889	0.652165	Sample_74	AI_export_Plate 1 UNS LN_G11_G11_CD4p_Live.fcs	RWs17_aIL10+aPD1_-1_UNS	aIL10+aPD1	RWs17	minus_one	aIL10+aPD1_minus_one	UNS	G11
1800	Sample_74	9	12	0.00941915	16.2169	23.4352	9.07624	Sample_74	AI_export_Plate 1 UNS LN_G11_G11_CD4p_Live.fcs	RWs17_aIL10+aPD1_-1_UNS	aIL10+aPD1	RWs17	minus_one	aIL10+aPD1_minus_one	UNS	G11
1801	Sample_75	1	142	0.11146	3.38832	3.00186	2.82289	Sample_75	AI_export_Plate 1 UNS LN_G12_G12_CD4p_Live.fcs	RZp17_aIL10_-1_UNS	aIL10	RZp17	minus_one	aIL10_minus_one	UNS	G12
1802	Sample_75	10	215	0.16876	15.1164	15.2241	1.69435	Sample_75	AI_export_Plate 1 UNS LN_G12_G12_CD4p_Live.fcs	RZp17_aIL10_-1_UNS	aIL10	RZp17	minus_one	aIL10_minus_one	UNS	G12
1803	Sample_75	11	10	0.00784929	25.0631	27.4616	4.88445	Sample_75	AI_export_Plate 1 UNS LN_G12_G12_CD4p_Live.fcs	RZp17_aIL10_-1_UNS	aIL10	RZp17	minus_one	aIL10_minus_one	UNS	G12
1804	Sample_75	12	5	0.00392465	7.91278	7.85792	1.6676	Sample_75	AI_export_Plate 1 UNS LN_G12_G12_CD4p_Live.fcs	RZp17_aIL10_-1_UNS	aIL10	RZp17	minus_one	aIL10_minus_one	UNS	G12
1805	Sample_75	13	16	0.0125589	19.9987	17.4804	3.38633	Sample_75	AI_export_Plate 1 UNS LN_G12_G12_CD4p_Live.fcs	RZp17_aIL10_-1_UNS	aIL10	RZp17	minus_one	aIL10_minus_one	UNS	G12
1806	Sample_75	14	1	0.000784929	27.342	27.342	NA	Sample_75	AI_export_Plate 1 UNS LN_G12_G12_CD4p_Live.fcs	RZp17_aIL10_-1_UNS	aIL10	RZp17	minus_one	aIL10_minus_one	UNS	G12
1807	Sample_75	15	2	0.00156986	NA	NA	NA	Sample_75	AI_export_Plate 1 UNS LN_G12_G12_CD4p_Live.fcs	RZp17_aIL10_-1_UNS	aIL10	RZp17	minus_one	aIL10_minus_one	UNS	G12
1808	Sample_75	16	0	0	NA	NA	NA	Sample_75	AI_export_Plate 1 UNS LN_G12_G12_CD4p_Live.fcs	RZp17_aIL10_-1_UNS	aIL10	RZp17	minus_one	aIL10_minus_one	UNS	G12
1809	Sample_75	17	3	0.00235479	NA	NA	NA	Sample_75	AI_export_Plate 1 UNS LN_G12_G12_CD4p_Live.fcs	RZp17_aIL10_-1_UNS	aIL10	RZp17	minus_one	aIL10_minus_one	UNS	G12
1810	Sample_75	18	0	0	NA	NA	NA	Sample_75	AI_export_Plate 1 UNS LN_G12_G12_CD4p_Live.fcs	RZp17_aIL10_-1_UNS	aIL10	RZp17	minus_one	aIL10_minus_one	UNS	G12
1811	Sample_75	2	410	0.321821	3.29961	3.13453	1.69618	Sample_75	AI_export_Plate 1 UNS LN_G12_G12_CD4p_Live.fcs	RZp17_aIL10_-1_UNS	aIL10	RZp17	minus_one	aIL10_minus_one	UNS	G12
1812	Sample_75	3	213	0.16719	10.0428	10.3422	1.93194	Sample_75	AI_export_Plate 1 UNS LN_G12_G12_CD4p_Live.fcs	RZp17_aIL10_-1_UNS	aIL10	RZp17	minus_one	aIL10_minus_one	UNS	G12
1813	Sample_75	4	144	0.11303	18.3062	18.7642	3.37708	Sample_75	AI_export_Plate 1 UNS LN_G12_G12_CD4p_Live.fcs	RZp17_aIL10_-1_UNS	aIL10	RZp17	minus_one	aIL10_minus_one	UNS	G12
1814	Sample_75	5	44	0.0345369	23.0341	23.1642	0.84778	Sample_75	AI_export_Plate 1 UNS LN_G12_G12_CD4p_Live.fcs	RZp17_aIL10_-1_UNS	aIL10	RZp17	minus_one	aIL10_minus_one	UNS	G12
1815	Sample_75	6	38	0.0298273	5.80714	5.55058	2.99939	Sample_75	AI_export_Plate 1 UNS LN_G12_G12_CD4p_Live.fcs	RZp17_aIL10_-1_UNS	aIL10	RZp17	minus_one	aIL10_minus_one	UNS	G12
1816	Sample_75	7	18	0.0141287	16.5604	17.779	5.66311	Sample_75	AI_export_Plate 1 UNS LN_G12_G12_CD4p_Live.fcs	RZp17_aIL10_-1_UNS	aIL10	RZp17	minus_one	aIL10_minus_one	UNS	G12
1817	Sample_75	8	4	0.00313972	25.9374	25.9162	0.207592	Sample_75	AI_export_Plate 1 UNS LN_G12_G12_CD4p_Live.fcs	RZp17_aIL10_-1_UNS	aIL10	RZp17	minus_one	aIL10_minus_one	UNS	G12
1818	Sample_75	9	9	0.00706436	14.4519	7.69473	8.64904	Sample_75	AI_export_Plate 1 UNS LN_G12_G12_CD4p_Live.fcs	RZp17_aIL10_-1_UNS	aIL10	RZp17	minus_one	aIL10_minus_one	UNS	G12
1819	Sample_76	1	338	0.265306	2.76472	2.3185	2.17945	Sample_76	AI_export_Plate 1 UNS LN_G2_G02_CD4p_Live.fcs	REu17_Control_-1_UNS	Control	REu17	minus_one	Control_minus_one	UNS	G02
1820	Sample_76	10	74	0.0580848	14.9041	14.6009	1.8558	Sample_76	AI_export_Plate 1 UNS LN_G2_G02_CD4p_Live.fcs	REu17_Control_-1_UNS	Control	REu17	minus_one	Control_minus_one	UNS	G02
1821	Sample_76	11	1	0.000784929	26.8047	26.8047	NA	Sample_76	AI_export_Plate 1 UNS LN_G2_G02_CD4p_Live.fcs	REu17_Control_-1_UNS	Control	REu17	minus_one	Control_minus_one	UNS	G02
1822	Sample_76	12	5	0.00392465	7.6654	7.63279	1.23481	Sample_76	AI_export_Plate 1 UNS LN_G2_G02_CD4p_Live.fcs	REu17_Control_-1_UNS	Control	REu17	minus_one	Control_minus_one	UNS	G02
1823	Sample_76	13	4	0.00313972	14.8127	17.4779	7.49791	Sample_76	AI_export_Plate 1 UNS LN_G2_G02_CD4p_Live.fcs	REu17_Control_-1_UNS	Control	REu17	minus_one	Control_minus_one	UNS	G02
1824	Sample_76	14	1	0.000784929	26.6741	26.6741	NA	Sample_76	AI_export_Plate 1 UNS LN_G2_G02_CD4p_Live.fcs	REu17_Control_-1_UNS	Control	REu17	minus_one	Control_minus_one	UNS	G02
1825	Sample_76	15	0	0	NA	NA	NA	Sample_76	AI_export_Plate 1 UNS LN_G2_G02_CD4p_Live.fcs	REu17_Control_-1_UNS	Control	REu17	minus_one	Control_minus_one	UNS	G02
1826	Sample_76	16	0	0	NA	NA	NA	Sample_76	AI_export_Plate 1 UNS LN_G2_G02_CD4p_Live.fcs	REu17_Control_-1_UNS	Control	REu17	minus_one	Control_minus_one	UNS	G02
1827	Sample_76	17	1	0.000784929	NA	NA	NA	Sample_76	AI_export_Plate 1 UNS LN_G2_G02_CD4p_Live.fcs	REu17_Control_-1_UNS	Control	REu17	minus_one	Control_minus_one	UNS	G02
1828	Sample_76	18	1	0.000784929	3.04573	3.04573	NA	Sample_76	AI_export_Plate 1 UNS LN_G2_G02_CD4p_Live.fcs	REu17_Control_-1_UNS	Control	REu17	minus_one	Control_minus_one	UNS	G02
1829	Sample_76	2	347	0.27237	3.21162	3.11196	1.61686	Sample_76	AI_export_Plate 1 UNS LN_G2_G02_CD4p_Live.fcs	REu17_Control_-1_UNS	Control	REu17	minus_one	Control_minus_one	UNS	G02
1830	Sample_76	3	246	0.193093	9.22017	9.48454	1.98435	Sample_76	AI_export_Plate 1 UNS LN_G2_G02_CD4p_Live.fcs	REu17_Control_-1_UNS	Control	REu17	minus_one	Control_minus_one	UNS	G02
1831	Sample_76	4	69	0.0541601	18.3782	18.9832	3.62962	Sample_76	AI_export_Plate 1 UNS LN_G2_G02_CD4p_Live.fcs	REu17_Control_-1_UNS	Control	REu17	minus_one	Control_minus_one	UNS	G02
1832	Sample_76	5	25	0.0196232	22.9034	22.8483	1.78963	Sample_76	AI_export_Plate 1 UNS LN_G2_G02_CD4p_Live.fcs	REu17_Control_-1_UNS	Control	REu17	minus_one	Control_minus_one	UNS	G02
1833	Sample_76	6	123	0.0965463	5.2897	5.64731	1.58092	Sample_76	AI_export_Plate 1 UNS LN_G2_G02_CD4p_Live.fcs	REu17_Control_-1_UNS	Control	REu17	minus_one	Control_minus_one	UNS	G02
1834	Sample_76	7	14	0.010989	16.7975	18.1161	4.74984	Sample_76	AI_export_Plate 1 UNS LN_G2_G02_CD4p_Live.fcs	REu17_Control_-1_UNS	Control	REu17	minus_one	Control_minus_one	UNS	G02
1835	Sample_76	8	16	0.0125589	25.7095	25.8357	0.547458	Sample_76	AI_export_Plate 1 UNS LN_G2_G02_CD4p_Live.fcs	REu17_Control_-1_UNS	Control	REu17	minus_one	Control_minus_one	UNS	G02
1836	Sample_76	9	9	0.00706436	12.4982	7.18667	8.27074	Sample_76	AI_export_Plate 1 UNS LN_G2_G02_CD4p_Live.fcs	REu17_Control_-1_UNS	Control	REu17	minus_one	Control_minus_one	UNS	G02
1837	Sample_77	1	424	0.33281	3.59734	3.2775	2.88703	Sample_77	AI_export_Plate 1 UNS LN_G3_G03_CD4p_Live.fcs	RKq17_aIL10+aPD1_-1_UNS	aIL10+aPD1	RKq17	minus_one	aIL10+aPD1_minus_one	UNS	G03
1838	Sample_77	10	103	0.0808477	14.9534	15.264	2.12799	Sample_77	AI_export_Plate 1 UNS LN_G3_G03_CD4p_Live.fcs	RKq17_aIL10+aPD1_-1_UNS	aIL10+aPD1	RKq17	minus_one	aIL10+aPD1_minus_one	UNS	G03
1839	Sample_77	11	4	0.00313972	27.2217	27.2407	0.361648	Sample_77	AI_export_Plate 1 UNS LN_G3_G03_CD4p_Live.fcs	RKq17_aIL10+aPD1_-1_UNS	aIL10+aPD1	RKq17	minus_one	aIL10+aPD1_minus_one	UNS	G03
1840	Sample_77	12	3	0.00235479	9.61245	9.61245	6.95577e-09	Sample_77	AI_export_Plate 1 UNS LN_G3_G03_CD4p_Live.fcs	RKq17_aIL10+aPD1_-1_UNS	aIL10+aPD1	RKq17	minus_one	aIL10+aPD1_minus_one	UNS	G03
1841	Sample_77	13	10	0.00784929	17.4237	17.4779	4.15325	Sample_77	AI_export_Plate 1 UNS LN_G3_G03_CD4p_Live.fcs	RKq17_aIL10+aPD1_-1_UNS	aIL10+aPD1	RKq17	minus_one	aIL10+aPD1_minus_one	UNS	G03
1842	Sample_77	14	3	0.00235479	27.342	27.342	6.95577e-09	Sample_77	AI_export_Plate 1 UNS LN_G3_G03_CD4p_Live.fcs	RKq17_aIL10+aPD1_-1_UNS	aIL10+aPD1	RKq17	minus_one	aIL10+aPD1_minus_one	UNS	G03
1843	Sample_77	15	2	0.00156986	NA	NA	NA	Sample_77	AI_export_Plate 1 UNS LN_G3_G03_CD4p_Live.fcs	RKq17_aIL10+aPD1_-1_UNS	aIL10+aPD1	RKq17	minus_one	aIL10+aPD1_minus_one	UNS	G03
1844	Sample_77	16	8	0.00627943	26.8895	26.816	0.395533	Sample_77	AI_export_Plate 1 UNS LN_G3_G03_CD4p_Live.fcs	RKq17_aIL10+aPD1_-1_UNS	aIL10+aPD1	RKq17	minus_one	aIL10+aPD1_minus_one	UNS	G03
1845	Sample_77	17	1	0.000784929	NA	NA	NA	Sample_77	AI_export_Plate 1 UNS LN_G3_G03_CD4p_Live.fcs	RKq17_aIL10+aPD1_-1_UNS	aIL10+aPD1	RKq17	minus_one	aIL10+aPD1_minus_one	UNS	G03
1846	Sample_77	18	0	0	NA	NA	NA	Sample_77	AI_export_Plate 1 UNS LN_G3_G03_CD4p_Live.fcs	RKq17_aIL10+aPD1_-1_UNS	aIL10+aPD1	RKq17	minus_one	aIL10+aPD1_minus_one	UNS	G03
1847	Sample_77	2	197	0.154631	3.23156	2.95547	2.11887	Sample_77	AI_export_Plate 1 UNS LN_G3_G03_CD4p_Live.fcs	RKq17_aIL10+aPD1_-1_UNS	aIL10+aPD1	RKq17	minus_one	aIL10+aPD1_minus_one	UNS	G03
1848	Sample_77	3	108	0.0847724	9.45304	9.15768	2.79702	Sample_77	AI_export_Plate 1 UNS LN_G3_G03_CD4p_Live.fcs	RKq17_aIL10+aPD1_-1_UNS	aIL10+aPD1	RKq17	minus_one	aIL10+aPD1_minus_one	UNS	G03
1849	Sample_77	4	136	0.10675	18.8627	19.0895	3.64144	Sample_77	AI_export_Plate 1 UNS LN_G3_G03_CD4p_Live.fcs	RKq17_aIL10+aPD1_-1_UNS	aIL10+aPD1	RKq17	minus_one	aIL10+aPD1_minus_one	UNS	G03
1850	Sample_77	5	69	0.0541601	23.188	23.3019	0.951722	Sample_77	AI_export_Plate 1 UNS LN_G3_G03_CD4p_Live.fcs	RKq17_aIL10+aPD1_-1_UNS	aIL10+aPD1	RKq17	minus_one	aIL10+aPD1_minus_one	UNS	G03
1851	Sample_77	6	154	0.120879	5.84467	6.13118	2.27231	Sample_77	AI_export_Plate 1 UNS LN_G3_G03_CD4p_Live.fcs	RKq17_aIL10+aPD1_-1_UNS	aIL10+aPD1	RKq17	minus_one	aIL10+aPD1_minus_one	UNS	G03
1852	Sample_77	7	19	0.0149137	17.1299	17.7479	5.70398	Sample_77	AI_export_Plate 1 UNS LN_G3_G03_CD4p_Live.fcs	RKq17_aIL10+aPD1_-1_UNS	aIL10+aPD1	RKq17	minus_one	aIL10+aPD1_minus_one	UNS	G03
1853	Sample_77	8	25	0.0196232	25.9217	26.0647	0.396753	Sample_77	AI_export_Plate 1 UNS LN_G3_G03_CD4p_Live.fcs	RKq17_aIL10+aPD1_-1_UNS	aIL10+aPD1	RKq17	minus_one	aIL10+aPD1_minus_one	UNS	G03
1854	Sample_77	9	8	0.00627943	15.1444	16.2355	9.05585	Sample_77	AI_export_Plate 1 UNS LN_G3_G03_CD4p_Live.fcs	RKq17_aIL10+aPD1_-1_UNS	aIL10+aPD1	RKq17	minus_one	aIL10+aPD1_minus_one	UNS	G03
1855	Sample_78	1	275	0.215856	3.69868	3.84823	2.15362	Sample_78	AI_export_Plate 1 UNS LN_G4_G04_CD4p_Live.fcs	RVc17_aIL10_-1_UNS	aIL10	RVc17	minus_one	aIL10_minus_one	UNS	G04
1856	Sample_78	10	87	0.0682889	14.7106	14.6832	2.16202	Sample_78	AI_export_Plate 1 UNS LN_G4_G04_CD4p_Live.fcs	RVc17_aIL10_-1_UNS	aIL10	RVc17	minus_one	aIL10_minus_one	UNS	G04
1857	Sample_78	11	5	0.00392465	27.4937	27.557	0.141469	Sample_78	AI_export_Plate 1 UNS LN_G4_G04_CD4p_Live.fcs	RVc17_aIL10_-1_UNS	aIL10	RVc17	minus_one	aIL10_minus_one	UNS	G04
1858	Sample_78	12	9	0.00706436	8.38702	9.08005	1.38162	Sample_78	AI_export_Plate 1 UNS LN_G4_G04_CD4p_Live.fcs	RVc17_aIL10_-1_UNS	aIL10	RVc17	minus_one	aIL10_minus_one	UNS	G04
1859	Sample_78	13	15	0.0117739	18.2794	17.4779	1.60684	Sample_78	AI_export_Plate 1 UNS LN_G4_G04_CD4p_Live.fcs	RVc17_aIL10_-1_UNS	aIL10	RVc17	minus_one	aIL10_minus_one	UNS	G04
1860	Sample_78	14	0	0	NA	NA	NA	Sample_78	AI_export_Plate 1 UNS LN_G4_G04_CD4p_Live.fcs	RVc17_aIL10_-1_UNS	aIL10	RVc17	minus_one	aIL10_minus_one	UNS	G04
1861	Sample_78	15	2	0.00156986	NA	NA	NA	Sample_78	AI_export_Plate 1 UNS LN_G4_G04_CD4p_Live.fcs	RVc17_aIL10_-1_UNS	aIL10	RVc17	minus_one	aIL10_minus_one	UNS	G04
1862	Sample_78	16	1	0.000784929	27.0893	27.0893	NA	Sample_78	AI_export_Plate 1 UNS LN_G4_G04_CD4p_Live.fcs	RVc17_aIL10_-1_UNS	aIL10	RVc17	minus_one	aIL10_minus_one	UNS	G04
1863	Sample_78	17	1	0.000784929	NA	NA	NA	Sample_78	AI_export_Plate 1 UNS LN_G4_G04_CD4p_Live.fcs	RVc17_aIL10_-1_UNS	aIL10	RVc17	minus_one	aIL10_minus_one	UNS	G04
1864	Sample_78	18	0	0	NA	NA	NA	Sample_78	AI_export_Plate 1 UNS LN_G4_G04_CD4p_Live.fcs	RVc17_aIL10_-1_UNS	aIL10	RVc17	minus_one	aIL10_minus_one	UNS	G04
1865	Sample_78	2	219	0.1719	3.54731	3.17133	2.05017	Sample_78	AI_export_Plate 1 UNS LN_G4_G04_CD4p_Live.fcs	RVc17_aIL10_-1_UNS	aIL10	RVc17	minus_one	aIL10_minus_one	UNS	G04
1866	Sample_78	3	266	0.208791	9.65709	9.72296	2.28999	Sample_78	AI_export_Plate 1 UNS LN_G4_G04_CD4p_Live.fcs	RVc17_aIL10_-1_UNS	aIL10	RVc17	minus_one	aIL10_minus_one	UNS	G04
1867	Sample_78	4	126	0.0989011	18.5157	18.9662	3.19189	Sample_78	AI_export_Plate 1 UNS LN_G4_G04_CD4p_Live.fcs	RVc17_aIL10_-1_UNS	aIL10	RVc17	minus_one	aIL10_minus_one	UNS	G04
1868	Sample_78	5	52	0.0408163	22.7056	23.0031	2.21787	Sample_78	AI_export_Plate 1 UNS LN_G4_G04_CD4p_Live.fcs	RVc17_aIL10_-1_UNS	aIL10	RVc17	minus_one	aIL10_minus_one	UNS	G04
1869	Sample_78	6	143	0.112245	5.6454	5.65	1.55929	Sample_78	AI_export_Plate 1 UNS LN_G4_G04_CD4p_Live.fcs	RVc17_aIL10_-1_UNS	aIL10	RVc17	minus_one	aIL10_minus_one	UNS	G04
1870	Sample_78	7	29	0.022763	18.7102	18.6446	2.79012	Sample_78	AI_export_Plate 1 UNS LN_G4_G04_CD4p_Live.fcs	RVc17_aIL10_-1_UNS	aIL10	RVc17	minus_one	aIL10_minus_one	UNS	G04
1871	Sample_78	8	23	0.0180534	25.2359	25.9339	3.43033	Sample_78	AI_export_Plate 1 UNS LN_G4_G04_CD4p_Live.fcs	RVc17_aIL10_-1_UNS	aIL10	RVc17	minus_one	aIL10_minus_one	UNS	G04
1872	Sample_78	9	21	0.0164835	18.0454	23.5609	7.99756	Sample_78	AI_export_Plate 1 UNS LN_G4_G04_CD4p_Live.fcs	RVc17_aIL10_-1_UNS	aIL10	RVc17	minus_one	aIL10_minus_one	UNS	G04
1873	Sample_79	1	186	0.145997	4.02848	4.23312	2.71072	Sample_79	AI_export_Plate 1 UNS LN_G6_G06_CD4p_Live.fcs	34920_aIL10_-1_UNS	aIL10	34920	minus_one	aIL10_minus_one	UNS	G06
1874	Sample_79	10	131	0.102826	14.9274	15.3229	1.82622	Sample_79	AI_export_Plate 1 UNS LN_G6_G06_CD4p_Live.fcs	34920_aIL10_-1_UNS	aIL10	34920	minus_one	aIL10_minus_one	UNS	G06
1875	Sample_79	11	11	0.00863422	27.2839	27.3411	0.330061	Sample_79	AI_export_Plate 1 UNS LN_G6_G06_CD4p_Live.fcs	34920_aIL10_-1_UNS	aIL10	34920	minus_one	aIL10_minus_one	UNS	G06
1876	Sample_79	12	2	0.00156986	7.65336	7.65336	1.5236	Sample_79	AI_export_Plate 1 UNS LN_G6_G06_CD4p_Live.fcs	34920_aIL10_-1_UNS	aIL10	34920	minus_one	aIL10_minus_one	UNS	G06
1877	Sample_79	13	12	0.00941915	17.978	17.4779	1.37614	Sample_79	AI_export_Plate 1 UNS LN_G6_G06_CD4p_Live.fcs	34920_aIL10_-1_UNS	aIL10	34920	minus_one	aIL10_minus_one	UNS	G06
1878	Sample_79	14	0	0	NA	NA	NA	Sample_79	AI_export_Plate 1 UNS LN_G6_G06_CD4p_Live.fcs	34920_aIL10_-1_UNS	aIL10	34920	minus_one	aIL10_minus_one	UNS	G06
1879	Sample_79	15	0	0	NA	NA	NA	Sample_79	AI_export_Plate 1 UNS LN_G6_G06_CD4p_Live.fcs	34920_aIL10_-1_UNS	aIL10	34920	minus_one	aIL10_minus_one	UNS	G06
1880	Sample_79	16	0	0	NA	NA	NA	Sample_79	AI_export_Plate 1 UNS LN_G6_G06_CD4p_Live.fcs	34920_aIL10_-1_UNS	aIL10	34920	minus_one	aIL10_minus_one	UNS	G06
1881	Sample_79	17	0	0	NA	NA	NA	Sample_79	AI_export_Plate 1 UNS LN_G6_G06_CD4p_Live.fcs	34920_aIL10_-1_UNS	aIL10	34920	minus_one	aIL10_minus_one	UNS	G06
1882	Sample_79	18	0	0	NA	NA	NA	Sample_79	AI_export_Plate 1 UNS LN_G6_G06_CD4p_Live.fcs	34920_aIL10_-1_UNS	aIL10	34920	minus_one	aIL10_minus_one	UNS	G06
1883	Sample_79	2	293	0.229984	3.28784	3.24165	1.38632	Sample_79	AI_export_Plate 1 UNS LN_G6_G06_CD4p_Live.fcs	34920_aIL10_-1_UNS	aIL10	34920	minus_one	aIL10_minus_one	UNS	G06
1884	Sample_79	3	186	0.145997	9.44406	9.62631	1.77241	Sample_79	AI_export_Plate 1 UNS LN_G6_G06_CD4p_Live.fcs	34920_aIL10_-1_UNS	aIL10	34920	minus_one	aIL10_minus_one	UNS	G06
1885	Sample_79	4	115	0.0902669	18.0663	18.7743	3.90998	Sample_79	AI_export_Plate 1 UNS LN_G6_G06_CD4p_Live.fcs	34920_aIL10_-1_UNS	aIL10	34920	minus_one	aIL10_minus_one	UNS	G06
1886	Sample_79	5	70	0.0549451	22.9237	23.1851	1.81897	Sample_79	AI_export_Plate 1 UNS LN_G6_G06_CD4p_Live.fcs	34920_aIL10_-1_UNS	aIL10	34920	minus_one	aIL10_minus_one	UNS	G06
1887	Sample_79	6	143	0.112245	5.98053	5.79402	2.36504	Sample_79	AI_export_Plate 1 UNS LN_G6_G06_CD4p_Live.fcs	34920_aIL10_-1_UNS	aIL10	34920	minus_one	aIL10_minus_one	UNS	G06
1888	Sample_79	7	37	0.0290424	18.8633	18.2931	2.63238	Sample_79	AI_export_Plate 1 UNS LN_G6_G06_CD4p_Live.fcs	34920_aIL10_-1_UNS	aIL10	34920	minus_one	aIL10_minus_one	UNS	G06
1889	Sample_79	8	64	0.0502355	25.1859	25.0597	0.627914	Sample_79	AI_export_Plate 1 UNS LN_G6_G06_CD4p_Live.fcs	34920_aIL10_-1_UNS	aIL10	34920	minus_one	aIL10_minus_one	UNS	G06
1890	Sample_79	9	24	0.0188383	19.8576	23.5609	6.5727	Sample_79	AI_export_Plate 1 UNS LN_G6_G06_CD4p_Live.fcs	34920_aIL10_-1_UNS	aIL10	34920	minus_one	aIL10_minus_one	UNS	G06
1891	Sample_8	1	329	0.258242	4.11473	4.50355	2.21924	Sample_8	AI_export_Plate 1 UNS LN_A5_A05_CD4p_Live.fcs	RHm17_aIL10_-1_UNS	aIL10	RHm17	minus_one	aIL10_minus_one	UNS	A05
1892	Sample_8	10	123	0.0965463	15.1689	15.437	1.41617	Sample_8	AI_export_Plate 1 UNS LN_A5_A05_CD4p_Live.fcs	RHm17_aIL10_-1_UNS	aIL10	RHm17	minus_one	aIL10_minus_one	UNS	A05
1893	Sample_8	11	12	0.00941915	27.2859	27.557	0.48937	Sample_8	AI_export_Plate 1 UNS LN_A5_A05_CD4p_Live.fcs	RHm17_aIL10_-1_UNS	aIL10	RHm17	minus_one	aIL10_minus_one	UNS	A05
1894	Sample_8	12	3	0.00235479	9.61245	9.61245	6.95577e-09	Sample_8	AI_export_Plate 1 UNS LN_A5_A05_CD4p_Live.fcs	RHm17_aIL10_-1_UNS	aIL10	RHm17	minus_one	aIL10_minus_one	UNS	A05
1895	Sample_8	13	37	0.0290424	19.0548	17.4808	2.07821	Sample_8	AI_export_Plate 1 UNS LN_A5_A05_CD4p_Live.fcs	RHm17_aIL10_-1_UNS	aIL10	RHm17	minus_one	aIL10_minus_one	UNS	A05
1896	Sample_8	14	0	0	NA	NA	NA	Sample_8	AI_export_Plate 1 UNS LN_A5_A05_CD4p_Live.fcs	RHm17_aIL10_-1_UNS	aIL10	RHm17	minus_one	aIL10_minus_one	UNS	A05
1897	Sample_8	15	0	0	NA	NA	NA	Sample_8	AI_export_Plate 1 UNS LN_A5_A05_CD4p_Live.fcs	RHm17_aIL10_-1_UNS	aIL10	RHm17	minus_one	aIL10_minus_one	UNS	A05
1898	Sample_8	16	0	0	NA	NA	NA	Sample_8	AI_export_Plate 1 UNS LN_A5_A05_CD4p_Live.fcs	RHm17_aIL10_-1_UNS	aIL10	RHm17	minus_one	aIL10_minus_one	UNS	A05
1899	Sample_8	17	2	0.00156986	NA	NA	NA	Sample_8	AI_export_Plate 1 UNS LN_A5_A05_CD4p_Live.fcs	RHm17_aIL10_-1_UNS	aIL10	RHm17	minus_one	aIL10_minus_one	UNS	A05
1900	Sample_8	18	0	0	NA	NA	NA	Sample_8	AI_export_Plate 1 UNS LN_A5_A05_CD4p_Live.fcs	RHm17_aIL10_-1_UNS	aIL10	RHm17	minus_one	aIL10_minus_one	UNS	A05
1901	Sample_8	2	114	0.0894819	3.58131	3.41644	1.43129	Sample_8	AI_export_Plate 1 UNS LN_A5_A05_CD4p_Live.fcs	RHm17_aIL10_-1_UNS	aIL10	RHm17	minus_one	aIL10_minus_one	UNS	A05
1902	Sample_8	3	165	0.129513	9.72839	9.90355	2.42657	Sample_8	AI_export_Plate 1 UNS LN_A5_A05_CD4p_Live.fcs	RHm17_aIL10_-1_UNS	aIL10	RHm17	minus_one	aIL10_minus_one	UNS	A05
1903	Sample_8	4	98	0.0769231	18.3928	18.7695	3.75347	Sample_8	AI_export_Plate 1 UNS LN_A5_A05_CD4p_Live.fcs	RHm17_aIL10_-1_UNS	aIL10	RHm17	minus_one	aIL10_minus_one	UNS	A05
1904	Sample_8	5	104	0.0816327	23.151	23.3335	1.26364	Sample_8	AI_export_Plate 1 UNS LN_A5_A05_CD4p_Live.fcs	RHm17_aIL10_-1_UNS	aIL10	RHm17	minus_one	aIL10_minus_one	UNS	A05
1905	Sample_8	6	228	0.178964	5.69354	5.64732	2.16167	Sample_8	AI_export_Plate 1 UNS LN_A5_A05_CD4p_Live.fcs	RHm17_aIL10_-1_UNS	aIL10	RHm17	minus_one	aIL10_minus_one	UNS	A05
1906	Sample_8	7	29	0.022763	18.7812	19.2752	2.90145	Sample_8	AI_export_Plate 1 UNS LN_A5_A05_CD4p_Live.fcs	RHm17_aIL10_-1_UNS	aIL10	RHm17	minus_one	aIL10_minus_one	UNS	A05
1907	Sample_8	8	11	0.00863422	25.661	25.8357	0.74076	Sample_8	AI_export_Plate 1 UNS LN_A5_A05_CD4p_Live.fcs	RHm17_aIL10_-1_UNS	aIL10	RHm17	minus_one	aIL10_minus_one	UNS	A05
1908	Sample_8	9	19	0.0149137	18.2276	23.5609	8.01685	Sample_8	AI_export_Plate 1 UNS LN_A5_A05_CD4p_Live.fcs	RHm17_aIL10_-1_UNS	aIL10	RHm17	minus_one	aIL10_minus_one	UNS	A05
1909	Sample_80	1	228	0.178964	3.86927	3.8199	2.60303	Sample_80	AI_export_Plate 1 UNS LN_G7_G07_CD4p_Live.fcs	34930_aIL10_-1_UNS	aIL10	34930	minus_one	aIL10_minus_one	UNS	G07
1910	Sample_80	10	135	0.105965	15.0066	15.2496	2.33989	Sample_80	AI_export_Plate 1 UNS LN_G7_G07_CD4p_Live.fcs	34930_aIL10_-1_UNS	aIL10	34930	minus_one	aIL10_minus_one	UNS	G07
1911	Sample_80	11	21	0.0164835	27.4355	27.557	0.2426	Sample_80	AI_export_Plate 1 UNS LN_G7_G07_CD4p_Live.fcs	34930_aIL10_-1_UNS	aIL10	34930	minus_one	aIL10_minus_one	UNS	G07
1912	Sample_80	12	6	0.00470958	8.84486	9.24241	0.946141	Sample_80	AI_export_Plate 1 UNS LN_G7_G07_CD4p_Live.fcs	34930_aIL10_-1_UNS	aIL10	34930	minus_one	aIL10_minus_one	UNS	G07
1913	Sample_80	13	51	0.0400314	18.3192	17.4779	2.21449	Sample_80	AI_export_Plate 1 UNS LN_G7_G07_CD4p_Live.fcs	34930_aIL10_-1_UNS	aIL10	34930	minus_one	aIL10_minus_one	UNS	G07
1914	Sample_80	14	0	0	NA	NA	NA	Sample_80	AI_export_Plate 1 UNS LN_G7_G07_CD4p_Live.fcs	34930_aIL10_-1_UNS	aIL10	34930	minus_one	aIL10_minus_one	UNS	G07
1915	Sample_80	15	1	0.000784929	NA	NA	NA	Sample_80	AI_export_Plate 1 UNS LN_G7_G07_CD4p_Live.fcs	34930_aIL10_-1_UNS	aIL10	34930	minus_one	aIL10_minus_one	UNS	G07
1916	Sample_80	16	1	0.000784929	26.4377	26.4377	NA	Sample_80	AI_export_Plate 1 UNS LN_G7_G07_CD4p_Live.fcs	34930_aIL10_-1_UNS	aIL10	34930	minus_one	aIL10_minus_one	UNS	G07
1917	Sample_80	17	1	0.000784929	NA	NA	NA	Sample_80	AI_export_Plate 1 UNS LN_G7_G07_CD4p_Live.fcs	34930_aIL10_-1_UNS	aIL10	34930	minus_one	aIL10_minus_one	UNS	G07
1918	Sample_80	18	1	0.000784929	3.62868	3.62868	NA	Sample_80	AI_export_Plate 1 UNS LN_G7_G07_CD4p_Live.fcs	34930_aIL10_-1_UNS	aIL10	34930	minus_one	aIL10_minus_one	UNS	G07
1919	Sample_80	2	190	0.149137	3.60672	3.30472	2.22953	Sample_80	AI_export_Plate 1 UNS LN_G7_G07_CD4p_Live.fcs	34930_aIL10_-1_UNS	aIL10	34930	minus_one	aIL10_minus_one	UNS	G07
1920	Sample_80	3	215	0.16876	9.6114	9.89773	2.04157	Sample_80	AI_export_Plate 1 UNS LN_G7_G07_CD4p_Live.fcs	34930_aIL10_-1_UNS	aIL10	34930	minus_one	aIL10_minus_one	UNS	G07
1921	Sample_80	4	98	0.0769231	18.9585	18.8873	3.19094	Sample_80	AI_export_Plate 1 UNS LN_G7_G07_CD4p_Live.fcs	34930_aIL10_-1_UNS	aIL10	34930	minus_one	aIL10_minus_one	UNS	G07
1922	Sample_80	5	67	0.0525903	22.9645	23.1065	1.65208	Sample_80	AI_export_Plate 1 UNS LN_G7_G07_CD4p_Live.fcs	34930_aIL10_-1_UNS	aIL10	34930	minus_one	aIL10_minus_one	UNS	G07
1923	Sample_80	6	151	0.118524	5.5237	5.76869	1.38553	Sample_80	AI_export_Plate 1 UNS LN_G7_G07_CD4p_Live.fcs	34930_aIL10_-1_UNS	aIL10	34930	minus_one	aIL10_minus_one	UNS	G07
1924	Sample_80	7	39	0.0306122	19.5488	20.1361	1.71222	Sample_80	AI_export_Plate 1 UNS LN_G7_G07_CD4p_Live.fcs	34930_aIL10_-1_UNS	aIL10	34930	minus_one	aIL10_minus_one	UNS	G07
1925	Sample_80	8	37	0.0290424	25.4633	25.6853	0.814806	Sample_80	AI_export_Plate 1 UNS LN_G7_G07_CD4p_Live.fcs	34930_aIL10_-1_UNS	aIL10	34930	minus_one	aIL10_minus_one	UNS	G07
1926	Sample_80	9	32	0.0251177	19.4358	23.5609	7.29213	Sample_80	AI_export_Plate 1 UNS LN_G7_G07_CD4p_Live.fcs	34930_aIL10_-1_UNS	aIL10	34930	minus_one	aIL10_minus_one	UNS	G07
1927	Sample_81	1	209	0.16405	3.43717	2.75483	2.99037	Sample_81	AI_export_Plate 1 UNS LN_G8_G08_CD4p_Live.fcs	REq17_Control_-1_UNS	Control	REq17	minus_one	Control_minus_one	UNS	G08
1928	Sample_81	10	122	0.0957614	15.0708	15.3298	1.84471	Sample_81	AI_export_Plate 1 UNS LN_G8_G08_CD4p_Live.fcs	REq17_Control_-1_UNS	Control	REq17	minus_one	Control_minus_one	UNS	G08
1929	Sample_81	11	6	0.00470958	27.3768	27.557	0.323751	Sample_81	AI_export_Plate 1 UNS LN_G8_G08_CD4p_Live.fcs	REq17_Control_-1_UNS	Control	REq17	minus_one	Control_minus_one	UNS	G08
1930	Sample_81	12	2	0.00156986	7.65891	7.65891	0.466262	Sample_81	AI_export_Plate 1 UNS LN_G8_G08_CD4p_Live.fcs	REq17_Control_-1_UNS	Control	REq17	minus_one	Control_minus_one	UNS	G08
1931	Sample_81	13	16	0.0125589	16.1027	17.4779	2.98039	Sample_81	AI_export_Plate 1 UNS LN_G8_G08_CD4p_Live.fcs	REq17_Control_-1_UNS	Control	REq17	minus_one	Control_minus_one	UNS	G08
1932	Sample_81	14	0	0	NA	NA	NA	Sample_81	AI_export_Plate 1 UNS LN_G8_G08_CD4p_Live.fcs	REq17_Control_-1_UNS	Control	REq17	minus_one	Control_minus_one	UNS	G08
1933	Sample_81	15	1	0.000784929	10.0033	10.0033	NA	Sample_81	AI_export_Plate 1 UNS LN_G8_G08_CD4p_Live.fcs	REq17_Control_-1_UNS	Control	REq17	minus_one	Control_minus_one	UNS	G08
1934	Sample_81	16	1	0.000784929	26.8177	26.8177	NA	Sample_81	AI_export_Plate 1 UNS LN_G8_G08_CD4p_Live.fcs	REq17_Control_-1_UNS	Control	REq17	minus_one	Control_minus_one	UNS	G08
1935	Sample_81	17	1	0.000784929	NA	NA	NA	Sample_81	AI_export_Plate 1 UNS LN_G8_G08_CD4p_Live.fcs	REq17_Control_-1_UNS	Control	REq17	minus_one	Control_minus_one	UNS	G08
1936	Sample_81	18	1	0.000784929	2.49367	2.49367	NA	Sample_81	AI_export_Plate 1 UNS LN_G8_G08_CD4p_Live.fcs	REq17_Control_-1_UNS	Control	REq17	minus_one	Control_minus_one	UNS	G08
1937	Sample_81	2	297	0.233124	3.08902	2.98501	2.03581	Sample_81	AI_export_Plate 1 UNS LN_G8_G08_CD4p_Live.fcs	REq17_Control_-1_UNS	Control	REq17	minus_one	Control_minus_one	UNS	G08
1938	Sample_81	3	142	0.11146	9.63818	9.67824	2.24523	Sample_81	AI_export_Plate 1 UNS LN_G8_G08_CD4p_Live.fcs	REq17_Control_-1_UNS	Control	REq17	minus_one	Control_minus_one	UNS	G08
1939	Sample_81	4	204	0.160126	18.3394	18.6798	3.22041	Sample_81	AI_export_Plate 1 UNS LN_G8_G08_CD4p_Live.fcs	REq17_Control_-1_UNS	Control	REq17	minus_one	Control_minus_one	UNS	G08
1940	Sample_81	5	71	0.05573	23.0315	22.7221	0.622565	Sample_81	AI_export_Plate 1 UNS LN_G8_G08_CD4p_Live.fcs	REq17_Control_-1_UNS	Control	REq17	minus_one	Control_minus_one	UNS	G08
1941	Sample_81	6	114	0.0894819	6.2856	6.2704	2.8716	Sample_81	AI_export_Plate 1 UNS LN_G8_G08_CD4p_Live.fcs	REq17_Control_-1_UNS	Control	REq17	minus_one	Control_minus_one	UNS	G08
1942	Sample_81	7	41	0.0321821	17.7817	17.8791	2.24827	Sample_81	AI_export_Plate 1 UNS LN_G8_G08_CD4p_Live.fcs	REq17_Control_-1_UNS	Control	REq17	minus_one	Control_minus_one	UNS	G08
1943	Sample_81	8	26	0.0204082	25.6547	25.7143	0.553369	Sample_81	AI_export_Plate 1 UNS LN_G8_G08_CD4p_Live.fcs	REq17_Control_-1_UNS	Control	REq17	minus_one	Control_minus_one	UNS	G08
1944	Sample_81	9	20	0.0156986	19.74	23.4352	6.52916	Sample_81	AI_export_Plate 1 UNS LN_G8_G08_CD4p_Live.fcs	REq17_Control_-1_UNS	Control	REq17	minus_one	Control_minus_one	UNS	G08
1945	Sample_82	1	206	0.161695	3.3202	2.79448	3.24523	Sample_82	AI_export_Plate 1 UNS LN_G9_G09_CD4p_Live.fcs	RGr17_aIL10_-1_UNS	aIL10	RGr17	minus_one	aIL10_minus_one	UNS	G09
1946	Sample_82	10	164	0.128728	15.0303	14.8607	1.8712	Sample_82	AI_export_Plate 1 UNS LN_G9_G09_CD4p_Live.fcs	RGr17_aIL10_-1_UNS	aIL10	RGr17	minus_one	aIL10_minus_one	UNS	G09
1947	Sample_82	11	9	0.00706436	27.4672	27.557	0.135456	Sample_82	AI_export_Plate 1 UNS LN_G9_G09_CD4p_Live.fcs	RGr17_aIL10_-1_UNS	aIL10	RGr17	minus_one	aIL10_minus_one	UNS	G09
1948	Sample_82	12	1	0.000784929	9.6123	9.6123	NA	Sample_82	AI_export_Plate 1 UNS LN_G9_G09_CD4p_Live.fcs	RGr17_aIL10_-1_UNS	aIL10	RGr17	minus_one	aIL10_minus_one	UNS	G09
1949	Sample_82	13	11	0.00863422	17.4586	17.4779	4.97898	Sample_82	AI_export_Plate 1 UNS LN_G9_G09_CD4p_Live.fcs	RGr17_aIL10_-1_UNS	aIL10	RGr17	minus_one	aIL10_minus_one	UNS	G09
1950	Sample_82	14	0	0	NA	NA	NA	Sample_82	AI_export_Plate 1 UNS LN_G9_G09_CD4p_Live.fcs	RGr17_aIL10_-1_UNS	aIL10	RGr17	minus_one	aIL10_minus_one	UNS	G09
1951	Sample_82	15	1	0.000784929	NA	NA	NA	Sample_82	AI_export_Plate 1 UNS LN_G9_G09_CD4p_Live.fcs	RGr17_aIL10_-1_UNS	aIL10	RGr17	minus_one	aIL10_minus_one	UNS	G09
1952	Sample_82	16	0	0	NA	NA	NA	Sample_82	AI_export_Plate 1 UNS LN_G9_G09_CD4p_Live.fcs	RGr17_aIL10_-1_UNS	aIL10	RGr17	minus_one	aIL10_minus_one	UNS	G09
1953	Sample_82	17	1	0.000784929	NA	NA	NA	Sample_82	AI_export_Plate 1 UNS LN_G9_G09_CD4p_Live.fcs	RGr17_aIL10_-1_UNS	aIL10	RGr17	minus_one	aIL10_minus_one	UNS	G09
1954	Sample_82	18	1	0.000784929	10.7768	10.7768	NA	Sample_82	AI_export_Plate 1 UNS LN_G9_G09_CD4p_Live.fcs	RGr17_aIL10_-1_UNS	aIL10	RGr17	minus_one	aIL10_minus_one	UNS	G09
1955	Sample_82	2	340	0.266876	3.2224	2.93685	2.54347	Sample_82	AI_export_Plate 1 UNS LN_G9_G09_CD4p_Live.fcs	RGr17_aIL10_-1_UNS	aIL10	RGr17	minus_one	aIL10_minus_one	UNS	G09
1956	Sample_82	3	180	0.141287	9.71827	9.84598	2.25662	Sample_82	AI_export_Plate 1 UNS LN_G9_G09_CD4p_Live.fcs	RGr17_aIL10_-1_UNS	aIL10	RGr17	minus_one	aIL10_minus_one	UNS	G09
1957	Sample_82	4	134	0.105181	18.8588	19.4129	3.78009	Sample_82	AI_export_Plate 1 UNS LN_G9_G09_CD4p_Live.fcs	RGr17_aIL10_-1_UNS	aIL10	RGr17	minus_one	aIL10_minus_one	UNS	G09
1958	Sample_82	5	62	0.0486656	22.4261	22.7177	3.15836	Sample_82	AI_export_Plate 1 UNS LN_G9_G09_CD4p_Live.fcs	RGr17_aIL10_-1_UNS	aIL10	RGr17	minus_one	aIL10_minus_one	UNS	G09
1959	Sample_82	6	104	0.0816327	5.97698	6.23967	1.22505	Sample_82	AI_export_Plate 1 UNS LN_G9_G09_CD4p_Live.fcs	RGr17_aIL10_-1_UNS	aIL10	RGr17	minus_one	aIL10_minus_one	UNS	G09
1960	Sample_82	7	30	0.0235479	18.7407	17.8849	1.68536	Sample_82	AI_export_Plate 1 UNS LN_G9_G09_CD4p_Live.fcs	RGr17_aIL10_-1_UNS	aIL10	RGr17	minus_one	aIL10_minus_one	UNS	G09
1961	Sample_82	8	9	0.00706436	25.5483	25.6566	0.571555	Sample_82	AI_export_Plate 1 UNS LN_G9_G09_CD4p_Live.fcs	RGr17_aIL10_-1_UNS	aIL10	RGr17	minus_one	aIL10_minus_one	UNS	G09
1962	Sample_82	9	21	0.0164835	17.9529	23.5609	7.8505	Sample_82	AI_export_Plate 1 UNS LN_G9_G09_CD4p_Live.fcs	RGr17_aIL10_-1_UNS	aIL10	RGr17	minus_one	aIL10_minus_one	UNS	G09
1963	Sample_83	1	235	0.184458	2.96649	2.37845	2.39788	Sample_83	AI_export_Plate 1 UNS LN_H1_H01_CD4p_Live.fcs	34918_aIL10+aPD1_7_UNS	aIL10+aPD1	34918	seven	aIL10+aPD1_seven	UNS	H01
1964	Sample_83	10	58	0.0455259	15.6693	16.0587	2.59458	Sample_83	AI_export_Plate 1 UNS LN_H1_H01_CD4p_Live.fcs	34918_aIL10+aPD1_7_UNS	aIL10+aPD1	34918	seven	aIL10+aPD1_seven	UNS	H01
1965	Sample_83	11	4	0.00313972	27.0616	27.4166	0.814485	Sample_83	AI_export_Plate 1 UNS LN_H1_H01_CD4p_Live.fcs	34918_aIL10+aPD1_7_UNS	aIL10+aPD1	34918	seven	aIL10+aPD1_seven	UNS	H01
1966	Sample_83	12	16	0.0125589	9.10937	9.61245	0.877069	Sample_83	AI_export_Plate 1 UNS LN_H1_H01_CD4p_Live.fcs	34918_aIL10+aPD1_7_UNS	aIL10+aPD1	34918	seven	aIL10+aPD1_seven	UNS	H01
1967	Sample_83	13	16	0.0125589	17.3299	17.4779	4.33848	Sample_83	AI_export_Plate 1 UNS LN_H1_H01_CD4p_Live.fcs	34918_aIL10+aPD1_7_UNS	aIL10+aPD1	34918	seven	aIL10+aPD1_seven	UNS	H01
1968	Sample_83	14	0	0	NA	NA	NA	Sample_83	AI_export_Plate 1 UNS LN_H1_H01_CD4p_Live.fcs	34918_aIL10+aPD1_7_UNS	aIL10+aPD1	34918	seven	aIL10+aPD1_seven	UNS	H01
1969	Sample_83	15	0	0	NA	NA	NA	Sample_83	AI_export_Plate 1 UNS LN_H1_H01_CD4p_Live.fcs	34918_aIL10+aPD1_7_UNS	aIL10+aPD1	34918	seven	aIL10+aPD1_seven	UNS	H01
1970	Sample_83	16	0	0	NA	NA	NA	Sample_83	AI_export_Plate 1 UNS LN_H1_H01_CD4p_Live.fcs	34918_aIL10+aPD1_7_UNS	aIL10+aPD1	34918	seven	aIL10+aPD1_seven	UNS	H01
1971	Sample_83	17	1	0.000784929	NA	NA	NA	Sample_83	AI_export_Plate 1 UNS LN_H1_H01_CD4p_Live.fcs	34918_aIL10+aPD1_7_UNS	aIL10+aPD1	34918	seven	aIL10+aPD1_seven	UNS	H01
1972	Sample_83	18	1	0.000784929	3.5801	3.5801	NA	Sample_83	AI_export_Plate 1 UNS LN_H1_H01_CD4p_Live.fcs	34918_aIL10+aPD1_7_UNS	aIL10+aPD1	34918	seven	aIL10+aPD1_seven	UNS	H01
1973	Sample_83	2	299	0.234694	3.38383	3.0982	2.52836	Sample_83	AI_export_Plate 1 UNS LN_H1_H01_CD4p_Live.fcs	34918_aIL10+aPD1_7_UNS	aIL10+aPD1	34918	seven	aIL10+aPD1_seven	UNS	H01
1974	Sample_83	3	289	0.226845	9.46704	9.61473	2.46872	Sample_83	AI_export_Plate 1 UNS LN_H1_H01_CD4p_Live.fcs	34918_aIL10+aPD1_7_UNS	aIL10+aPD1	34918	seven	aIL10+aPD1_seven	UNS	H01
1975	Sample_83	4	119	0.0934066	18.8356	19.2912	4.09336	Sample_83	AI_export_Plate 1 UNS LN_H1_H01_CD4p_Live.fcs	34918_aIL10+aPD1_7_UNS	aIL10+aPD1	34918	seven	aIL10+aPD1_seven	UNS	H01
1976	Sample_83	5	50	0.0392465	22.7443	22.7198	1.5434	Sample_83	AI_export_Plate 1 UNS LN_H1_H01_CD4p_Live.fcs	34918_aIL10+aPD1_7_UNS	aIL10+aPD1	34918	seven	aIL10+aPD1_seven	UNS	H01
1977	Sample_83	6	139	0.109105	5.75029	6.2052	1.52153	Sample_83	AI_export_Plate 1 UNS LN_H1_H01_CD4p_Live.fcs	34918_aIL10+aPD1_7_UNS	aIL10+aPD1	34918	seven	aIL10+aPD1_seven	UNS	H01
1978	Sample_83	7	27	0.0211931	18.3004	18.4875	3.62781	Sample_83	AI_export_Plate 1 UNS LN_H1_H01_CD4p_Live.fcs	34918_aIL10+aPD1_7_UNS	aIL10+aPD1	34918	seven	aIL10+aPD1_seven	UNS	H01
1979	Sample_83	8	10	0.00784929	25.7969	25.895	0.670718	Sample_83	AI_export_Plate 1 UNS LN_H1_H01_CD4p_Live.fcs	34918_aIL10+aPD1_7_UNS	aIL10+aPD1	34918	seven	aIL10+aPD1_seven	UNS	H01
1980	Sample_83	9	10	0.00784929	13.9729	7.49114	8.09649	Sample_83	AI_export_Plate 1 UNS LN_H1_H01_CD4p_Live.fcs	34918_aIL10+aPD1_7_UNS	aIL10+aPD1	34918	seven	aIL10+aPD1_seven	UNS	H01
1981	Sample_84	1	194	0.152276	3.8043	4.30782	2.27463	Sample_84	AI_export_Plate 1 UNS LN_H10_H10_CD4p_Live.fcs	REq17_Control_7_UNS	Control	REq17	seven	Control_seven	UNS	H10
1982	Sample_84	10	135	0.105965	14.8521	15.1243	1.73618	Sample_84	AI_export_Plate 1 UNS LN_H10_H10_CD4p_Live.fcs	REq17_Control_7_UNS	Control	REq17	seven	Control_seven	UNS	H10
1983	Sample_84	11	19	0.0149137	27.3803	27.557	0.250143	Sample_84	AI_export_Plate 1 UNS LN_H10_H10_CD4p_Live.fcs	REq17_Control_7_UNS	Control	REq17	seven	Control_seven	UNS	H10
1984	Sample_84	12	23	0.0180534	8.90605	9.61239	1.53951	Sample_84	AI_export_Plate 1 UNS LN_H10_H10_CD4p_Live.fcs	REq17_Control_7_UNS	Control	REq17	seven	Control_seven	UNS	H10
1985	Sample_84	13	30	0.0235479	19.3171	17.4779	4.24347	Sample_84	AI_export_Plate 1 UNS LN_H10_H10_CD4p_Live.fcs	REq17_Control_7_UNS	Control	REq17	seven	Control_seven	UNS	H10
1986	Sample_84	14	0	0	NA	NA	NA	Sample_84	AI_export_Plate 1 UNS LN_H10_H10_CD4p_Live.fcs	REq17_Control_7_UNS	Control	REq17	seven	Control_seven	UNS	H10
1987	Sample_84	15	0	0	NA	NA	NA	Sample_84	AI_export_Plate 1 UNS LN_H10_H10_CD4p_Live.fcs	REq17_Control_7_UNS	Control	REq17	seven	Control_seven	UNS	H10
1988	Sample_84	16	0	0	NA	NA	NA	Sample_84	AI_export_Plate 1 UNS LN_H10_H10_CD4p_Live.fcs	REq17_Control_7_UNS	Control	REq17	seven	Control_seven	UNS	H10
1989	Sample_84	17	0	0	NA	NA	NA	Sample_84	AI_export_Plate 1 UNS LN_H10_H10_CD4p_Live.fcs	REq17_Control_7_UNS	Control	REq17	seven	Control_seven	UNS	H10
1990	Sample_84	18	0	0	NA	NA	NA	Sample_84	AI_export_Plate 1 UNS LN_H10_H10_CD4p_Live.fcs	REq17_Control_7_UNS	Control	REq17	seven	Control_seven	UNS	H10
1991	Sample_84	2	237	0.186028	3.43858	3.16857	2.14946	Sample_84	AI_export_Plate 1 UNS LN_H10_H10_CD4p_Live.fcs	REq17_Control_7_UNS	Control	REq17	seven	Control_seven	UNS	H10
1992	Sample_84	3	330	0.259027	9.69906	10.0033	2.06845	Sample_84	AI_export_Plate 1 UNS LN_H10_H10_CD4p_Live.fcs	REq17_Control_7_UNS	Control	REq17	seven	Control_seven	UNS	H10
1993	Sample_84	4	117	0.0918367	19.3471	19.6425	3.07225	Sample_84	AI_export_Plate 1 UNS LN_H10_H10_CD4p_Live.fcs	REq17_Control_7_UNS	Control	REq17	seven	Control_seven	UNS	H10
1994	Sample_84	5	61	0.0478807	22.5141	22.7177	1.76773	Sample_84	AI_export_Plate 1 UNS LN_H10_H10_CD4p_Live.fcs	REq17_Control_7_UNS	Control	REq17	seven	Control_seven	UNS	H10
1995	Sample_84	6	84	0.0659341	5.97114	6.04265	2.07155	Sample_84	AI_export_Plate 1 UNS LN_H10_H10_CD4p_Live.fcs	REq17_Control_7_UNS	Control	REq17	seven	Control_seven	UNS	H10
1996	Sample_84	7	25	0.0196232	18.2849	20.1158	4.49165	Sample_84	AI_export_Plate 1 UNS LN_H10_H10_CD4p_Live.fcs	REq17_Control_7_UNS	Control	REq17	seven	Control_seven	UNS	H10
1997	Sample_84	8	8	0.00627943	23.1113	25.8459	8.11286	Sample_84	AI_export_Plate 1 UNS LN_H10_H10_CD4p_Live.fcs	REq17_Control_7_UNS	Control	REq17	seven	Control_seven	UNS	H10
1998	Sample_84	9	11	0.00863422	18.4639	23.5609	7.51442	Sample_84	AI_export_Plate 1 UNS LN_H10_H10_CD4p_Live.fcs	REq17_Control_7_UNS	Control	REq17	seven	Control_seven	UNS	H10
1999	Sample_85	1	238	0.186813	2.96157	2.61723	2.26888	Sample_85	AI_export_Plate 1 UNS LN_H11_H11_CD4p_Live.fcs	RGr17_aIL10_7_UNS	aIL10	RGr17	seven	aIL10_seven	UNS	H11
[truncated: 287 more rows]

## Sheet: Stats
	louvain	Week Post-TX	.y.	group1	group2	n1	n2	statistic	p	p.adj	p.adj.signif
31	16	minus_one	relative_frequency	aIL10+aPD1	aIL10	10	10	76.5	0.036	0.036	*
32	16	minus_one	relative_frequency	aIL10+aPD1	Control	10	7	56	0.036	0.036	*
93	9	thirty_six	relative_frequency	aIL10+aPD1	aIL10	9	9	16.5	0.038	0.038	*
94	9	thirty_six	relative_frequency	aIL10+aPD1	Control	9	8	13	0.03	0.038	*
21	9	minus_one	relative_frequency	aIL10+aPD1	aIL10	10	10	20.5	0.027	0.054	ns
176	16	twenty_one	relative_frequency	aIL10+aPD1	Control	10	8	17.5	0.04	0.08	ns
35	14	minus_one	relative_frequency	aIL10+aPD1	aIL10	10	10	74	0.044	0.088	ns
85	15	thirty_six	relative_frequency	aIL10+aPD1	aIL10	9	9	21	0.081	0.092	ns
86	15	thirty_six	relative_frequency	aIL10+aPD1	Control	9	8	18.5	0.092	0.092	ns
119	3	twelve	relative_frequency	aIL10+aPD1	aIL10	7	8	13	0.094	0.094	ns
120	3	twelve	relative_frequency	aIL10+aPD1	Control	7	7	9	0.053	0.094	ns
43	6	seven	relative_frequency	aIL10+aPD1	aIL10	9	9	62	0.062	0.125	ns
41	18	seven	relative_frequency	aIL10+aPD1	aIL10	9	9	59.5	0.063	0.126	ns
42	18	seven	relative_frequency	aIL10+aPD1	Control	9	7	44.5	0.138	0.138	ns
37	1	seven	relative_frequency	aIL10+aPD1	aIL10	9	9	61	0.077	0.154	ns
101	8	thirty_six	relative_frequency	aIL10+aPD1	aIL10	9	9	20	0.077	0.154	ns
161	10	twenty_one	relative_frequency	aIL10+aPD1	aIL10	10	9	65	0.113	0.155	ns
162	10	twenty_one	relative_frequency	aIL10+aPD1	Control	10	8	56.5	0.155	0.155	ns
142	11	twelve	relative_frequency	aIL10+aPD1	Control	7	7	38	0.096	0.191	ns
102	8	thirty_six	relative_frequency	aIL10+aPD1	Control	9	8	22	0.2	0.2	ns
22	9	minus_one	relative_frequency	aIL10+aPD1	Control	10	7	21.5	0.202	0.202	ns
61	4	seven	relative_frequency	aIL10+aPD1	aIL10	9	9	23	0.133	0.21	ns
62	4	seven	relative_frequency	aIL10+aPD1	Control	9	7	44	0.21	0.21	ns
78	18	thirty_six	relative_frequency	aIL10+aPD1	Control	9	8	50.5	0.115	0.23	ns
174	8	twenty_one	relative_frequency	aIL10+aPD1	Control	10	8	22	0.119	0.238	ns
49	15	seven	relative_frequency	aIL10+aPD1	aIL10	9	9	24	0.123	0.246	ns
83	3	thirty_six	relative_frequency	aIL10+aPD1	aIL10	9	9	54	0.258	0.258	ns
84	3	thirty_six	relative_frequency	aIL10+aPD1	Control	9	8	51.5	0.149	0.258	ns
113	18	twelve	relative_frequency	aIL10+aPD1	aIL10	7	8	40	0.131	0.262	ns
13	15	minus_one	relative_frequency	aIL10+aPD1	aIL10	10	10	36.5	0.279	0.279	ns
14	15	minus_one	relative_frequency	aIL10+aPD1	Control	10	7	22	0.184	0.279	ns
175	16	twenty_one	relative_frequency	aIL10+aPD1	aIL10	10	9	33	0.307	0.307	ns
134	4	twelve	relative_frequency	aIL10+aPD1	Control	7	7	13	0.159	0.318	ns
50	15	seven	relative_frequency	aIL10+aPD1	Control	9	7	40	0.325	0.325	ns
15	17	minus_one	relative_frequency	aIL10+aPD1	aIL10	10	10	37.5	0.332	0.332	ns
16	17	minus_one	relative_frequency	aIL10+aPD1	Control	10	7	23.5	0.233	0.332	ns
77	18	thirty_six	relative_frequency	aIL10+aPD1	aIL10	9	9	50.5	0.34	0.34	ns
117	12	twelve	relative_frequency	aIL10+aPD1	aIL10	7	8	16	0.18	0.36	ns
107	14	thirty_six	relative_frequency	aIL10+aPD1	aIL10	9	9	29.5	0.266	0.401	ns
108	14	thirty_six	relative_frequency	aIL10+aPD1	Control	9	8	28.5	0.401	0.401	ns
150	18	twenty_one	relative_frequency	aIL10+aPD1	Control	10	8	26	0.202	0.404	ns
141	11	twelve	relative_frequency	aIL10+aPD1	aIL10	7	8	35.5	0.416	0.416	ns
179	14	twenty_one	relative_frequency	aIL10+aPD1	aIL10	10	9	55	0.417	0.417	ns
180	14	twenty_one	relative_frequency	aIL10+aPD1	Control	10	8	53.5	0.224	0.417	ns
29	8	minus_one	relative_frequency	aIL10+aPD1	aIL10	10	10	33	0.211	0.422	ns
79	6	thirty_six	relative_frequency	aIL10+aPD1	aIL10	9	9	55	0.215	0.423	ns
80	6	thirty_six	relative_frequency	aIL10+aPD1	Control	9	8	27	0.423	0.423	ns
30	8	minus_one	relative_frequency	aIL10+aPD1	Control	10	7	26.5	0.432	0.432	ns
87	17	thirty_six	relative_frequency	aIL10+aPD1	aIL10	9	9	27	0.222	0.444	ns
122	15	twelve	relative_frequency	aIL10+aPD1	Control	7	7	33.5	0.228	0.456	ns
39	2	seven	relative_frequency	aIL10+aPD1	aIL10	9	9	31	0.436	0.47	ns
40	2	seven	relative_frequency	aIL10+aPD1	Control	9	7	24	0.47	0.47	ns
114	18	twelve	relative_frequency	aIL10+aPD1	Control	7	7	30	0.476	0.476	ns
151	6	twenty_one	relative_frequency	aIL10+aPD1	aIL10	10	9	34.5	0.414	0.477	ns
152	6	twenty_one	relative_frequency	aIL10+aPD1	Control	10	8	31.5	0.477	0.477	ns
60	7	seven	relative_frequency	aIL10+aPD1	Control	9	7	43	0.244	0.488	ns
128	13	twelve	relative_frequency	aIL10+aPD1	Control	7	7	34	0.25	0.5	ns
91	13	thirty_six	relative_frequency	aIL10+aPD1	aIL10	9	9	27	0.251	0.502	ns
51	17	seven	relative_frequency	aIL10+aPD1	aIL10	9	9	48	0.504	0.504	ns
52	17	seven	relative_frequency	aIL10+aPD1	Control	9	7	24.5	0.471	0.504	ns
73	1	thirty_six	relative_frequency	aIL10+aPD1	aIL10	9	9	54	0.258	0.516	ns
89	10	thirty_six	relative_frequency	aIL10+aPD1	aIL10	9	9	54	0.258	0.516	ns
9	12	minus_one	relative_frequency	aIL10+aPD1	aIL10	10	10	63	0.34	0.524	ns
10	12	minus_one	relative_frequency	aIL10+aPD1	Control	10	7	42	0.524	0.524	ns
133	4	twelve	relative_frequency	aIL10+aPD1	aIL10	7	8	22	0.524	0.524	ns
92	13	thirty_six	relative_frequency	aIL10+aPD1	Control	9	8	29	0.531	0.531	ns
44	6	seven	relative_frequency	aIL10+aPD1	Control	9	7	38	0.536	0.536	ns
165	9	twenty_one	relative_frequency	aIL10+aPD1	aIL10	10	9	37	0.54	0.54	ns
166	9	twenty_one	relative_frequency	aIL10+aPD1	Control	10	8	30	0.398	0.54	ns
173	8	twenty_one	relative_frequency	aIL10+aPD1	aIL10	10	9	37	0.54	0.54	ns
74	1	thirty_six	relative_frequency	aIL10+aPD1	Control	9	8	43	0.541	0.541	ns
23	7	minus_one	relative_frequency	aIL10+aPD1	aIL10	10	10	65	0.272	0.544	ns
104	16	thirty_six	relative_frequency	aIL10+aPD1	Control	9	8	46.5	0.281	0.562	ns
99	5	thirty_six	relative_frequency	aIL10+aPD1	aIL10	9	9	28	0.288	0.563	ns
100	5	thirty_six	relative_frequency	aIL10+aPD1	Control	9	8	42.5	0.563	0.563	ns
33	11	minus_one	relative_frequency	aIL10+aPD1	aIL10	10	10	42	0.569	0.569	ns
34	11	minus_one	relative_frequency	aIL10+aPD1	Control	10	7	41.5	0.556	0.569	ns
65	8	seven	relative_frequency	aIL10+aPD1	aIL10	9	9	34	0.594	0.594	ns
66	8	seven	relative_frequency	aIL10+aPD1	Control	9	7	39.5	0.424	0.594	ns
177	11	twenty_one	relative_frequency	aIL10+aPD1	aIL10	10	9	52	0.594	0.594	ns
178	11	twenty_one	relative_frequency	aIL10+aPD1	Control	10	8	46.5	0.593	0.594	ns
75	2	thirty_six	relative_frequency	aIL10+aPD1	aIL10	9	9	32.5	0.508	0.606	ns
76	2	thirty_six	relative_frequency	aIL10+aPD1	Control	9	8	30	0.606	0.606	ns
90	10	thirty_six	relative_frequency	aIL10+aPD1	Control	9	8	42	0.606	0.606	ns
105	11	thirty_six	relative_frequency	aIL10+aPD1	aIL10	9	9	29	0.331	0.606	ns
106	11	thirty_six	relative_frequency	aIL10+aPD1	Control	9	8	30	0.606	0.606	ns
132	7	twelve	relative_frequency	aIL10+aPD1	Control	7	7	33	0.304	0.608	ns
115	6	twelve	relative_frequency	aIL10+aPD1	aIL10	7	8	20.5	0.417	0.609	ns
116	6	twelve	relative_frequency	aIL10+aPD1	Control	7	7	20	0.609	0.609	ns
154	12	twenty_one	relative_frequency	aIL10+aPD1	Control	10	8	28	0.305	0.61	ns
53	10	seven	relative_frequency	aIL10+aPD1	aIL10	9	9	28.5	0.309	0.618	ns
59	7	seven	relative_frequency	aIL10+aPD1	aIL10	9	9	34.5	0.626	0.626	ns
64	5	seven	relative_frequency	aIL10+aPD1	Control	9	7	41.5	0.314	0.628	ns
95	7	thirty_six	relative_frequency	aIL10+aPD1	aIL10	9	9	34.5	0.627	0.629	ns
96	7	thirty_six	relative_frequency	aIL10+aPD1	Control	9	8	30.5	0.629	0.629	ns
137	8	twelve	relative_frequency	aIL10+aPD1	aIL10	7	8	32.5	0.642	0.642	ns
138	8	twelve	relative_frequency	aIL10+aPD1	Control	7	7	16.5	0.337	0.642	ns
1	1	minus_one	relative_frequency	aIL10+aPD1	aIL10	10	10	56.5	0.65	0.65	ns
2	1	minus_one	relative_frequency	aIL10+aPD1	Control	10	7	28	0.536	0.65	ns
139	16	twelve	relative_frequency	aIL10+aPD1	aIL10	7	8	24	0.666	0.666	ns
140	16	twelve	relative_frequency	aIL10+aPD1	Control	7	7	18.5	0.46	0.666	ns
159	17	twenty_one	relative_frequency	aIL10+aPD1	aIL10	10	9	40	0.689	0.689	ns
160	17	twenty_one	relative_frequency	aIL10+aPD1	Control	10	8	46	0.582	0.689	ns
135	5	twelve	relative_frequency	aIL10+aPD1	aIL10	7	8	32	0.694	0.694	ns
136	5	twelve	relative_frequency	aIL10+aPD1	Control	7	7	31	0.456	0.694	ns
36	14	minus_one	relative_frequency	aIL10+aPD1	Control	10	7	39	0.72	0.72	ns
6	18	minus_one	relative_frequency	aIL10+aPD1	Control	10	7	44	0.362	0.724	ns
131	7	twelve	relative_frequency	aIL10+aPD1	aIL10	7	8	31.5	0.728	0.728	ns
71	14	seven	relative_frequency	aIL10+aPD1	aIL10	9	9	47	0.563	0.732	ns
72	14	seven	relative_frequency	aIL10+aPD1	Control	9	7	35	0.732	0.732	ns
118	12	twelve	relative_frequency	aIL10+aPD1	Control	7	7	21.5	0.747	0.747	ns
69	11	seven	relative_frequency	aIL10+aPD1	aIL10	9	9	35	0.658	0.75	ns
70	11	seven	relative_frequency	aIL10+aPD1	Control	9	7	35	0.75	0.75	ns
163	13	twenty_one	relative_frequency	aIL10+aPD1	aIL10	10	9	40	0.713	0.755	ns
164	13	twenty_one	relative_frequency	aIL10+aPD1	Control	10	8	44	0.755	0.755	ns
38	1	seven	relative_frequency	aIL10+aPD1	Control	9	7	28	0.758	0.758	ns
25	4	minus_one	relative_frequency	aIL10+aPD1	aIL10	10	10	45.5	0.762	0.762	ns
26	4	minus_one	relative_frequency	aIL10+aPD1	Control	10	7	29	0.601	0.762	ns
5	18	minus_one	relative_frequency	aIL10+aPD1	aIL10	10	10	54	0.775	0.775	ns
88	17	thirty_six	relative_frequency	aIL10+aPD1	Control	9	8	39	0.795	0.795	ns
103	16	thirty_six	relative_frequency	aIL10+aPD1	aIL10	9	9	37.5	0.817	0.817	ns
169	4	twenty_one	relative_frequency	aIL10+aPD1	aIL10	10	9	51.5	0.624	0.824	ns
170	4	twenty_one	relative_frequency	aIL10+aPD1	Control	10	8	43	0.824	0.824	ns
55	13	seven	relative_frequency	aIL10+aPD1	aIL10	9	9	33	0.535	0.831	ns
56	13	seven	relative_frequency	aIL10+aPD1	Control	9	7	34	0.831	0.831	ns
153	12	twenty_one	relative_frequency	aIL10+aPD1	aIL10	10	9	48	0.837	0.837	ns
143	14	twelve	relative_frequency	aIL10+aPD1	aIL10	7	8	30	0.853	0.853	ns
144	14	twelve	relative_frequency	aIL10+aPD1	Control	7	7	27.5	0.731	0.853	ns
147	2	twenty_one	relative_frequency	aIL10+aPD1	aIL10	10	9	40	0.72	0.859	ns
148	2	twenty_one	relative_frequency	aIL10+aPD1	Control	10	8	42.5	0.859	0.859	ns
157	15	twenty_one	relative_frequency	aIL10+aPD1	aIL10	10	9	42.5	0.864	0.864	ns
158	15	twenty_one	relative_frequency	aIL10+aPD1	Control	10	8	44	0.741	0.864	ns
111	2	twelve	relative_frequency	aIL10+aPD1	aIL10	7	8	26	0.867	0.867	ns
112	2	twelve	relative_frequency	aIL10+aPD1	Control	7	7	28.5	0.654	0.867	ns
145	1	twenty_one	relative_frequency	aIL10+aPD1	aIL10	10	9	47.5	0.87	0.87	ns
146	1	twenty_one	relative_frequency	aIL10+aPD1	Control	10	8	36	0.762	0.87	ns
81	12	thirty_six	relative_frequency	aIL10+aPD1	aIL10	9	9	35.5	0.689	0.884	ns
82	12	thirty_six	relative_frequency	aIL10+aPD1	Control	9	8	38	0.884	0.884	ns
130	9	twelve	relative_frequency	aIL10+aPD1	Control	7	7	18	0.443	0.886	ns
129	9	twelve	relative_frequency	aIL10+aPD1	aIL10	7	8	29.5	0.907	0.907	ns
46	12	seven	relative_frequency	aIL10+aPD1	Control	9	7	24	0.454	0.908	ns
109	1	twelve	relative_frequency	aIL10+aPD1	aIL10	7	8	29.5	0.908	0.908	ns
110	1	twelve	relative_frequency	aIL10+aPD1	Control	7	7	23	0.902	0.908	ns
17	10	minus_one	relative_frequency	aIL10+aPD1	aIL10	10	10	52	0.912	0.912	ns
18	10	minus_one	relative_frequency	aIL10+aPD1	Control	10	7	37	0.883	0.912	ns
11	3	minus_one	relative_frequency	aIL10+aPD1	aIL10	10	10	52	0.912	0.922	ns
12	3	minus_one	relative_frequency	aIL10+aPD1	Control	10	7	36.5	0.922	0.922	ns
45	12	seven	relative_frequency	aIL10+aPD1	aIL10	9	9	39	0.929	0.929	ns
63	5	seven	relative_frequency	aIL10+aPD1	aIL10	9	9	39	0.931	0.931	ns
155	3	twenty_one	relative_frequency	aIL10+aPD1	aIL10	10	9	46.5	0.935	0.935	ns
156	3	twenty_one	relative_frequency	aIL10+aPD1	Control	10	8	43.5	0.79	0.935	ns
121	15	twelve	relative_frequency	aIL10+aPD1	aIL10	7	8	27	0.952	0.952	ns
57	9	seven	relative_frequency	aIL10+aPD1	aIL10	9	9	35.5	0.691	0.958	ns
58	9	seven	relative_frequency	aIL10+aPD1	Control	9	7	32.5	0.958	0.958	ns
24	7	minus_one	relative_frequency	aIL10+aPD1	Control	10	7	34	0.961	0.961	ns
3	2	minus_one	relative_frequency	aIL10+aPD1	aIL10	10	10	51	0.97	0.97	ns
4	2	minus_one	relative_frequency	aIL10+aPD1	Control	10	7	32	0.813	0.97	ns
7	6	minus_one	relative_frequency	aIL10+aPD1	aIL10	10	10	50	1	1	ns
8	6	minus_one	relative_frequency	aIL10+aPD1	Control	10	7	41	0.601	1	ns
19	13	minus_one	relative_frequency	aIL10+aPD1	aIL10	10	10	43.5	0.648	1	ns
20	13	minus_one	relative_frequency	aIL10+aPD1	Control	10	7	35.5	1	1	ns
27	5	minus_one	relative_frequency	aIL10+aPD1	aIL10	10	10	50.5	1	1	ns
28	5	minus_one	relative_frequency	aIL10+aPD1	Control	10	7	28	0.536	1	ns
47	3	seven	relative_frequency	aIL10+aPD1	aIL10	9	9	40	1	1	ns
48	3	seven	relative_frequency	aIL10+aPD1	Control	9	7	36	0.681	1	ns
54	10	seven	relative_frequency	aIL10+aPD1	Control	9	7	31.5	1	1	ns
67	16	seven	relative_frequency	aIL10+aPD1	aIL10	9	9	40.5	1	1	ns
68	16	seven	relative_frequency	aIL10+aPD1	Control	9	7	36.5	0.596	1	ns
97	4	thirty_six	relative_frequency	aIL10+aPD1	aIL10	9	9	40.5	1	1	ns
98	4	thirty_six	relative_frequency	aIL10+aPD1	Control	9	8	33	0.815	1	ns
123	17	twelve	relative_frequency	aIL10+aPD1	aIL10	7	8	28.5	1	1	ns
124	17	twelve	relative_frequency	aIL10+aPD1	Control	7	7	21	0.686	1	ns
125	10	twelve	relative_frequency	aIL10+aPD1	aIL10	7	8	30	0.862	1	ns
126	10	twelve	relative_frequency	aIL10+aPD1	Control	7	7	25	1	1	ns
127	13	twelve	relative_frequency	aIL10+aPD1	aIL10	7	8	28	1	1	ns
149	18	twenty_one	relative_frequency	aIL10+aPD1	aIL10	10	9	45	1	1	ns
167	7	twenty_one	relative_frequency	aIL10+aPD1	aIL10	10	9	38.5	0.624	1	ns
168	7	twenty_one	relative_frequency	aIL10+aPD1	Control	10	8	39.5	1	1	ns
171	5	twenty_one	relative_frequency	aIL10+aPD1	aIL10	10	9	45.5	1	1	ns
172	5	twenty_one	relative_frequency	aIL10+aPD1	Control	10	8	45.5	0.657	1	ns
