# Supplementary material for: Dual blockade of IL-10 and PD-1 leads to control of SIV viral rebound following analytical treatment interruption.
Source: Research Square preprint supplement (doi:10.21203/rs.3.rs-3175716/v1), 2023-08-14
Supplement: Supplementary file 2 [file 8de7e0f8746b30578c85dc07.xlsx]

## Sheet: CD8_data
	SampleID	louvain	absolute_counts	relative_frequency	mean	median	sd	name	filename	Sample_name	group	Animal	Week Post-TX	week.tx	stim	well_confirm
1	Sample_1	1	167	0.222667	21.954	22.6611	2.6781	Sample_1	AI_export_Plate 1 UNS LN_A1_A01_CD8p_CD8_live.fcs	RFl17_aIL10+aPD1_-1_UNS	aIL10+aPD1	RFl17	minus_one	aIL10+aPD1_minus_one	UNS	A01
2	Sample_1	10	6	0.008	14.4587	15.9855	3.99613	Sample_1	AI_export_Plate 1 UNS LN_A1_A01_CD8p_CD8_live.fcs	RFl17_aIL10+aPD1_-1_UNS	aIL10+aPD1	RFl17	minus_one	aIL10+aPD1_minus_one	UNS	A01
3	Sample_1	11	18	0.024	19.2401	19.5483	0.904138	Sample_1	AI_export_Plate 1 UNS LN_A1_A01_CD8p_CD8_live.fcs	RFl17_aIL10+aPD1_-1_UNS	aIL10+aPD1	RFl17	minus_one	aIL10+aPD1_minus_one	UNS	A01
4	Sample_1	12	8	0.0106667	10.0221	9.2204	2.00894	Sample_1	AI_export_Plate 1 UNS LN_A1_A01_CD8p_CD8_live.fcs	RFl17_aIL10+aPD1_-1_UNS	aIL10+aPD1	RFl17	minus_one	aIL10+aPD1_minus_one	UNS	A01
5	Sample_1	13	17	0.0226667	NA	NA	NA	Sample_1	AI_export_Plate 1 UNS LN_A1_A01_CD8p_CD8_live.fcs	RFl17_aIL10+aPD1_-1_UNS	aIL10+aPD1	RFl17	minus_one	aIL10+aPD1_minus_one	UNS	A01
6	Sample_1	14	3	0.004	10.2393	10.2393	13.6829	Sample_1	AI_export_Plate 1 UNS LN_A1_A01_CD8p_CD8_live.fcs	RFl17_aIL10+aPD1_-1_UNS	aIL10+aPD1	RFl17	minus_one	aIL10+aPD1_minus_one	UNS	A01
7	Sample_1	15	2	0.00266667	9.04525	9.04525	NA	Sample_1	AI_export_Plate 1 UNS LN_A1_A01_CD8p_CD8_live.fcs	RFl17_aIL10+aPD1_-1_UNS	aIL10+aPD1	RFl17	minus_one	aIL10+aPD1_minus_one	UNS	A01
8	Sample_1	2	113	0.150667	5.15334	5.37585	2.9626	Sample_1	AI_export_Plate 1 UNS LN_A1_A01_CD8p_CD8_live.fcs	RFl17_aIL10+aPD1_-1_UNS	aIL10+aPD1	RFl17	minus_one	aIL10+aPD1_minus_one	UNS	A01
9	Sample_1	3	69	0.092	4.20213	3.66676	2.63809	Sample_1	AI_export_Plate 1 UNS LN_A1_A01_CD8p_CD8_live.fcs	RFl17_aIL10+aPD1_-1_UNS	aIL10+aPD1	RFl17	minus_one	aIL10+aPD1_minus_one	UNS	A01
10	Sample_1	4	135	0.18	NA	NA	NA	Sample_1	AI_export_Plate 1 UNS LN_A1_A01_CD8p_CD8_live.fcs	RFl17_aIL10+aPD1_-1_UNS	aIL10+aPD1	RFl17	minus_one	aIL10+aPD1_minus_one	UNS	A01
11	Sample_1	5	96	0.128	18.276	18.6516	1.52424	Sample_1	AI_export_Plate 1 UNS LN_A1_A01_CD8p_CD8_live.fcs	RFl17_aIL10+aPD1_-1_UNS	aIL10+aPD1	RFl17	minus_one	aIL10+aPD1_minus_one	UNS	A01
12	Sample_1	6	39	0.052	NA	NA	NA	Sample_1	AI_export_Plate 1 UNS LN_A1_A01_CD8p_CD8_live.fcs	RFl17_aIL10+aPD1_-1_UNS	aIL10+aPD1	RFl17	minus_one	aIL10+aPD1_minus_one	UNS	A01
13	Sample_1	7	13	0.0173333	19.5146	19.5021	0.479129	Sample_1	AI_export_Plate 1 UNS LN_A1_A01_CD8p_CD8_live.fcs	RFl17_aIL10+aPD1_-1_UNS	aIL10+aPD1	RFl17	minus_one	aIL10+aPD1_minus_one	UNS	A01
14	Sample_1	8	52	0.0693333	11.8041	12.1976	1.03865	Sample_1	AI_export_Plate 1 UNS LN_A1_A01_CD8p_CD8_live.fcs	RFl17_aIL10+aPD1_-1_UNS	aIL10+aPD1	RFl17	minus_one	aIL10+aPD1_minus_one	UNS	A01
15	Sample_1	9	12	0.016	15.7369	15.8914	1.71177	Sample_1	AI_export_Plate 1 UNS LN_A1_A01_CD8p_CD8_live.fcs	RFl17_aIL10+aPD1_-1_UNS	aIL10+aPD1	RFl17	minus_one	aIL10+aPD1_minus_one	UNS	A01
16	Sample_10	1	177	0.236	21.7856	21.7701	2.51516	Sample_10	AI_export_Plate 1 UNS LN_A7_A07_CD8p_CD8_live.fcs	RTd17_Control_-1_UNS	Control	RTd17	minus_one	Control_minus_one	UNS	A07
17	Sample_10	10	25	0.0333333	16.5154	17.0591	1.87546	Sample_10	AI_export_Plate 1 UNS LN_A7_A07_CD8p_CD8_live.fcs	RTd17_Control_-1_UNS	Control	RTd17	minus_one	Control_minus_one	UNS	A07
18	Sample_10	11	76	0.101333	19.3769	19.5483	0.995165	Sample_10	AI_export_Plate 1 UNS LN_A7_A07_CD8p_CD8_live.fcs	RTd17_Control_-1_UNS	Control	RTd17	minus_one	Control_minus_one	UNS	A07
19	Sample_10	12	4	0.00533333	11.7032	12.4958	2.85699	Sample_10	AI_export_Plate 1 UNS LN_A7_A07_CD8p_CD8_live.fcs	RTd17_Control_-1_UNS	Control	RTd17	minus_one	Control_minus_one	UNS	A07
20	Sample_10	13	18	0.024	NA	NA	NA	Sample_10	AI_export_Plate 1 UNS LN_A7_A07_CD8p_CD8_live.fcs	RTd17_Control_-1_UNS	Control	RTd17	minus_one	Control_minus_one	UNS	A07
21	Sample_10	14	0	0	NA	NA	NA	Sample_10	AI_export_Plate 1 UNS LN_A7_A07_CD8p_CD8_live.fcs	RTd17_Control_-1_UNS	Control	RTd17	minus_one	Control_minus_one	UNS	A07
22	Sample_10	15	0	0	NA	NA	NA	Sample_10	AI_export_Plate 1 UNS LN_A7_A07_CD8p_CD8_live.fcs	RTd17_Control_-1_UNS	Control	RTd17	minus_one	Control_minus_one	UNS	A07
23	Sample_10	2	68	0.0906667	5.25931	4.68297	3.85247	Sample_10	AI_export_Plate 1 UNS LN_A7_A07_CD8p_CD8_live.fcs	RTd17_Control_-1_UNS	Control	RTd17	minus_one	Control_minus_one	UNS	A07
24	Sample_10	3	17	0.0226667	6.00167	3.80926	6.33766	Sample_10	AI_export_Plate 1 UNS LN_A7_A07_CD8p_CD8_live.fcs	RTd17_Control_-1_UNS	Control	RTd17	minus_one	Control_minus_one	UNS	A07
25	Sample_10	4	121	0.161333	NA	NA	NA	Sample_10	AI_export_Plate 1 UNS LN_A7_A07_CD8p_CD8_live.fcs	RTd17_Control_-1_UNS	Control	RTd17	minus_one	Control_minus_one	UNS	A07
26	Sample_10	5	125	0.166667	18.5066	18.7147	0.930072	Sample_10	AI_export_Plate 1 UNS LN_A7_A07_CD8p_CD8_live.fcs	RTd17_Control_-1_UNS	Control	RTd17	minus_one	Control_minus_one	UNS	A07
27	Sample_10	6	25	0.0333333	19.3526	19.3526	0.344346	Sample_10	AI_export_Plate 1 UNS LN_A7_A07_CD8p_CD8_live.fcs	RTd17_Control_-1_UNS	Control	RTd17	minus_one	Control_minus_one	UNS	A07
28	Sample_10	7	28	0.0373333	19.5509	19.5961	0.164057	Sample_10	AI_export_Plate 1 UNS LN_A7_A07_CD8p_CD8_live.fcs	RTd17_Control_-1_UNS	Control	RTd17	minus_one	Control_minus_one	UNS	A07
29	Sample_10	8	25	0.0333333	12.137	12.2452	1.37169	Sample_10	AI_export_Plate 1 UNS LN_A7_A07_CD8p_CD8_live.fcs	RTd17_Control_-1_UNS	Control	RTd17	minus_one	Control_minus_one	UNS	A07
30	Sample_10	9	41	0.0546667	15.7911	15.8914	0.777843	Sample_10	AI_export_Plate 1 UNS LN_A7_A07_CD8p_CD8_live.fcs	RTd17_Control_-1_UNS	Control	RTd17	minus_one	Control_minus_one	UNS	A07
31	Sample_100	1	143	0.190667	21.6926	22.4267	3.33301	Sample_100	AI_export_Plate 2 UNS LN_A12_A12_CD8p_CD8_live.fcs	REu17_Control_21_UNS	Control	REu17	twenty_one	Control_twenty_one	UNS	A12
32	Sample_100	10	13	0.0173333	14.104	15.6007	3.98124	Sample_100	AI_export_Plate 2 UNS LN_A12_A12_CD8p_CD8_live.fcs	REu17_Control_21_UNS	Control	REu17	twenty_one	Control_twenty_one	UNS	A12
33	Sample_100	11	15	0.02	19.5152	19.5483	1.0034	Sample_100	AI_export_Plate 2 UNS LN_A12_A12_CD8p_CD8_live.fcs	REu17_Control_21_UNS	Control	REu17	twenty_one	Control_twenty_one	UNS	A12
34	Sample_100	12	12	0.016	9.05522	8.55314	1.57714	Sample_100	AI_export_Plate 2 UNS LN_A12_A12_CD8p_CD8_live.fcs	REu17_Control_21_UNS	Control	REu17	twenty_one	Control_twenty_one	UNS	A12
35	Sample_100	13	7	0.00933333	NA	NA	NA	Sample_100	AI_export_Plate 2 UNS LN_A12_A12_CD8p_CD8_live.fcs	REu17_Control_21_UNS	Control	REu17	twenty_one	Control_twenty_one	UNS	A12
36	Sample_100	14	1	0.00133333	NA	NA	NA	Sample_100	AI_export_Plate 2 UNS LN_A12_A12_CD8p_CD8_live.fcs	REu17_Control_21_UNS	Control	REu17	twenty_one	Control_twenty_one	UNS	A12
37	Sample_100	15	4	0.00533333	14.2846	9.04525	9.07483	Sample_100	AI_export_Plate 2 UNS LN_A12_A12_CD8p_CD8_live.fcs	REu17_Control_21_UNS	Control	REu17	twenty_one	Control_twenty_one	UNS	A12
38	Sample_100	2	189	0.252	4.87665	4.71621	2.55053	Sample_100	AI_export_Plate 2 UNS LN_A12_A12_CD8p_CD8_live.fcs	REu17_Control_21_UNS	Control	REu17	twenty_one	Control_twenty_one	UNS	A12
39	Sample_100	3	150	0.2	3.9965	3.66676	2.53707	Sample_100	AI_export_Plate 2 UNS LN_A12_A12_CD8p_CD8_live.fcs	REu17_Control_21_UNS	Control	REu17	twenty_one	Control_twenty_one	UNS	A12
40	Sample_100	4	91	0.121333	NA	NA	NA	Sample_100	AI_export_Plate 2 UNS LN_A12_A12_CD8p_CD8_live.fcs	REu17_Control_21_UNS	Control	REu17	twenty_one	Control_twenty_one	UNS	A12
41	Sample_100	5	67	0.0893333	18.8879	19.2006	2.03172	Sample_100	AI_export_Plate 2 UNS LN_A12_A12_CD8p_CD8_live.fcs	REu17_Control_21_UNS	Control	REu17	twenty_one	Control_twenty_one	UNS	A12
42	Sample_100	6	13	0.0173333	18.5609	18.5609	NA	Sample_100	AI_export_Plate 2 UNS LN_A12_A12_CD8p_CD8_live.fcs	REu17_Control_21_UNS	Control	REu17	twenty_one	Control_twenty_one	UNS	A12
43	Sample_100	7	6	0.008	19.5757	19.5961	0.0377826	Sample_100	AI_export_Plate 2 UNS LN_A12_A12_CD8p_CD8_live.fcs	REu17_Control_21_UNS	Control	REu17	twenty_one	Control_twenty_one	UNS	A12
44	Sample_100	8	18	0.024	11.5438	11.7544	1.0517	Sample_100	AI_export_Plate 2 UNS LN_A12_A12_CD8p_CD8_live.fcs	REu17_Control_21_UNS	Control	REu17	twenty_one	Control_twenty_one	UNS	A12
45	Sample_100	9	21	0.028	15.5736	15.8914	1.11564	Sample_100	AI_export_Plate 2 UNS LN_A12_A12_CD8p_CD8_live.fcs	REu17_Control_21_UNS	Control	REu17	twenty_one	Control_twenty_one	UNS	A12
46	Sample_101	1	59	0.0786667	20.7265	21.3327	3.9039	Sample_101	AI_export_Plate 2 UNS LN_A2_A02_CD8p_CD8_live.fcs	RKq17_aIL10+aPD1_12_UNS	aIL10+aPD1	RKq17	twelve	aIL10+aPD1_twelve	UNS	A02
47	Sample_101	10	9	0.012	11.5976	9.94709	5.81879	Sample_101	AI_export_Plate 2 UNS LN_A2_A02_CD8p_CD8_live.fcs	RKq17_aIL10+aPD1_12_UNS	aIL10+aPD1	RKq17	twelve	aIL10+aPD1_twelve	UNS	A02
48	Sample_101	11	20	0.0266667	19.3931	19.5483	1.96285	Sample_101	AI_export_Plate 2 UNS LN_A2_A02_CD8p_CD8_live.fcs	RKq17_aIL10+aPD1_12_UNS	aIL10+aPD1	RKq17	twelve	aIL10+aPD1_twelve	UNS	A02
49	Sample_101	12	20	0.0266667	8.9487	8.75848	1.26979	Sample_101	AI_export_Plate 2 UNS LN_A2_A02_CD8p_CD8_live.fcs	RKq17_aIL10+aPD1_12_UNS	aIL10+aPD1	RKq17	twelve	aIL10+aPD1_twelve	UNS	A02
50	Sample_101	13	3	0.004	NA	NA	NA	Sample_101	AI_export_Plate 2 UNS LN_A2_A02_CD8p_CD8_live.fcs	RKq17_aIL10+aPD1_12_UNS	aIL10+aPD1	RKq17	twelve	aIL10+aPD1_twelve	UNS	A02
51	Sample_101	14	4	0.00533333	0.56396	0.56396	3.79093e-09	Sample_101	AI_export_Plate 2 UNS LN_A2_A02_CD8p_CD8_live.fcs	RKq17_aIL10+aPD1_12_UNS	aIL10+aPD1	RKq17	twelve	aIL10+aPD1_twelve	UNS	A02
52	Sample_101	15	1	0.00133333	9.34254	9.34254	NA	Sample_101	AI_export_Plate 2 UNS LN_A2_A02_CD8p_CD8_live.fcs	RKq17_aIL10+aPD1_12_UNS	aIL10+aPD1	RKq17	twelve	aIL10+aPD1_twelve	UNS	A02
53	Sample_101	2	272	0.362667	4.39535	4.61967	2.54007	Sample_101	AI_export_Plate 2 UNS LN_A2_A02_CD8p_CD8_live.fcs	RKq17_aIL10+aPD1_12_UNS	aIL10+aPD1	RKq17	twelve	aIL10+aPD1_twelve	UNS	A02
54	Sample_101	3	216	0.288	3.84618	3.35245	3.35915	Sample_101	AI_export_Plate 2 UNS LN_A2_A02_CD8p_CD8_live.fcs	RKq17_aIL10+aPD1_12_UNS	aIL10+aPD1	RKq17	twelve	aIL10+aPD1_twelve	UNS	A02
55	Sample_101	4	19	0.0253333	NA	NA	NA	Sample_101	AI_export_Plate 2 UNS LN_A2_A02_CD8p_CD8_live.fcs	RKq17_aIL10+aPD1_12_UNS	aIL10+aPD1	RKq17	twelve	aIL10+aPD1_twelve	UNS	A02
56	Sample_101	5	55	0.0733333	17.8987	18.2792	2.35244	Sample_101	AI_export_Plate 2 UNS LN_A2_A02_CD8p_CD8_live.fcs	RKq17_aIL10+aPD1_12_UNS	aIL10+aPD1	RKq17	twelve	aIL10+aPD1_twelve	UNS	A02
57	Sample_101	6	4	0.00533333	NA	NA	NA	Sample_101	AI_export_Plate 2 UNS LN_A2_A02_CD8p_CD8_live.fcs	RKq17_aIL10+aPD1_12_UNS	aIL10+aPD1	RKq17	twelve	aIL10+aPD1_twelve	UNS	A02
58	Sample_101	7	7	0.00933333	19.3477	19.5021	0.395124	Sample_101	AI_export_Plate 2 UNS LN_A2_A02_CD8p_CD8_live.fcs	RKq17_aIL10+aPD1_12_UNS	aIL10+aPD1	RKq17	twelve	aIL10+aPD1_twelve	UNS	A02
59	Sample_101	8	50	0.0666667	11.2598	11.7791	1.31969	Sample_101	AI_export_Plate 2 UNS LN_A2_A02_CD8p_CD8_live.fcs	RKq17_aIL10+aPD1_12_UNS	aIL10+aPD1	RKq17	twelve	aIL10+aPD1_twelve	UNS	A02
60	Sample_101	9	11	0.0146667	15.1087	15.8914	2.81732	Sample_101	AI_export_Plate 2 UNS LN_A2_A02_CD8p_CD8_live.fcs	RKq17_aIL10+aPD1_12_UNS	aIL10+aPD1	RKq17	twelve	aIL10+aPD1_twelve	UNS	A02
61	Sample_102	1	150	0.2	21.8336	22.1974	2.6297	Sample_102	AI_export_Plate 2 UNS LN_A3_A03_CD8p_CD8_live.fcs	RVc17_aIL10_12_UNS	aIL10	RVc17	twelve	aIL10_twelve	UNS	A03
62	Sample_102	10	12	0.016	13.8603	14.3453	4.08087	Sample_102	AI_export_Plate 2 UNS LN_A3_A03_CD8p_CD8_live.fcs	RVc17_aIL10_12_UNS	aIL10	RVc17	twelve	aIL10_twelve	UNS	A03
63	Sample_102	11	11	0.0146667	19.5267	19.5483	0.038135	Sample_102	AI_export_Plate 2 UNS LN_A3_A03_CD8p_CD8_live.fcs	RVc17_aIL10_12_UNS	aIL10	RVc17	twelve	aIL10_twelve	UNS	A03
64	Sample_102	12	6	0.008	12.0996	9.06643	6.48497	Sample_102	AI_export_Plate 2 UNS LN_A3_A03_CD8p_CD8_live.fcs	RVc17_aIL10_12_UNS	aIL10	RVc17	twelve	aIL10_twelve	UNS	A03
65	Sample_102	13	3	0.004	NA	NA	NA	Sample_102	AI_export_Plate 2 UNS LN_A3_A03_CD8p_CD8_live.fcs	RVc17_aIL10_12_UNS	aIL10	RVc17	twelve	aIL10_twelve	UNS	A03
66	Sample_102	14	2	0.00266667	19.3637	19.3637	NA	Sample_102	AI_export_Plate 2 UNS LN_A3_A03_CD8p_CD8_live.fcs	RVc17_aIL10_12_UNS	aIL10	RVc17	twelve	aIL10_twelve	UNS	A03
67	Sample_102	15	1	0.00133333	NA	NA	NA	Sample_102	AI_export_Plate 2 UNS LN_A3_A03_CD8p_CD8_live.fcs	RVc17_aIL10_12_UNS	aIL10	RVc17	twelve	aIL10_twelve	UNS	A03
68	Sample_102	2	158	0.210667	4.73731	4.71621	2.50658	Sample_102	AI_export_Plate 2 UNS LN_A3_A03_CD8p_CD8_live.fcs	RVc17_aIL10_12_UNS	aIL10	RVc17	twelve	aIL10_twelve	UNS	A03
69	Sample_102	3	155	0.206667	3.9675	3.66676	2.70036	Sample_102	AI_export_Plate 2 UNS LN_A3_A03_CD8p_CD8_live.fcs	RVc17_aIL10_12_UNS	aIL10	RVc17	twelve	aIL10_twelve	UNS	A03
70	Sample_102	4	65	0.0866667	NA	NA	NA	Sample_102	AI_export_Plate 2 UNS LN_A3_A03_CD8p_CD8_live.fcs	RVc17_aIL10_12_UNS	aIL10	RVc17	twelve	aIL10_twelve	UNS	A03
71	Sample_102	5	101	0.134667	18.6061	18.8272	1.4677	Sample_102	AI_export_Plate 2 UNS LN_A3_A03_CD8p_CD8_live.fcs	RVc17_aIL10_12_UNS	aIL10	RVc17	twelve	aIL10_twelve	UNS	A03
72	Sample_102	6	8	0.0106667	NA	NA	NA	Sample_102	AI_export_Plate 2 UNS LN_A3_A03_CD8p_CD8_live.fcs	RVc17_aIL10_12_UNS	aIL10	RVc17	twelve	aIL10_twelve	UNS	A03
73	Sample_102	7	6	0.008	19.4472	19.5491	0.217867	Sample_102	AI_export_Plate 2 UNS LN_A3_A03_CD8p_CD8_live.fcs	RVc17_aIL10_12_UNS	aIL10	RVc17	twelve	aIL10_twelve	UNS	A03
74	Sample_102	8	30	0.04	12.2268	12.2583	3.05823	Sample_102	AI_export_Plate 2 UNS LN_A3_A03_CD8p_CD8_live.fcs	RVc17_aIL10_12_UNS	aIL10	RVc17	twelve	aIL10_twelve	UNS	A03
75	Sample_102	9	42	0.056	16.4522	15.9648	1.70643	Sample_102	AI_export_Plate 2 UNS LN_A3_A03_CD8p_CD8_live.fcs	RVc17_aIL10_12_UNS	aIL10	RVc17	twelve	aIL10_twelve	UNS	A03
76	Sample_103	1	244	0.325333	22.0693	23.0174	2.79461	Sample_103	AI_export_Plate 2 UNS LN_A4_A04_CD8p_CD8_live.fcs	RZg17_Control_12_UNS	Control	RZg17	twelve	Control_twelve	UNS	A04
77	Sample_103	10	19	0.0253333	15.1231	15.4936	2.48691	Sample_103	AI_export_Plate 2 UNS LN_A4_A04_CD8p_CD8_live.fcs	RZg17_Control_12_UNS	Control	RZg17	twelve	Control_twelve	UNS	A04
78	Sample_103	11	28	0.0373333	18.8459	19.5483	2.36805	Sample_103	AI_export_Plate 2 UNS LN_A4_A04_CD8p_CD8_live.fcs	RZg17_Control_12_UNS	Control	RZg17	twelve	Control_twelve	UNS	A04
79	Sample_103	12	6	0.008	8.46572	8.66918	0.475166	Sample_103	AI_export_Plate 2 UNS LN_A4_A04_CD8p_CD8_live.fcs	RZg17_Control_12_UNS	Control	RZg17	twelve	Control_twelve	UNS	A04
80	Sample_103	13	5	0.00666667	NA	NA	NA	Sample_103	AI_export_Plate 2 UNS LN_A4_A04_CD8p_CD8_live.fcs	RZg17_Control_12_UNS	Control	RZg17	twelve	Control_twelve	UNS	A04
81	Sample_103	14	1	0.00133333	17.0369	17.0369	NA	Sample_103	AI_export_Plate 2 UNS LN_A4_A04_CD8p_CD8_live.fcs	RZg17_Control_12_UNS	Control	RZg17	twelve	Control_twelve	UNS	A04
82	Sample_103	15	1	0.00133333	24.7633	24.7633	NA	Sample_103	AI_export_Plate 2 UNS LN_A4_A04_CD8p_CD8_live.fcs	RZg17_Control_12_UNS	Control	RZg17	twelve	Control_twelve	UNS	A04
83	Sample_103	2	114	0.152	5.24541	5.34001	2.53471	Sample_103	AI_export_Plate 2 UNS LN_A4_A04_CD8p_CD8_live.fcs	RZg17_Control_12_UNS	Control	RZg17	twelve	Control_twelve	UNS	A04
84	Sample_103	3	67	0.0893333	4.17226	3.79744	2.72747	Sample_103	AI_export_Plate 2 UNS LN_A4_A04_CD8p_CD8_live.fcs	RZg17_Control_12_UNS	Control	RZg17	twelve	Control_twelve	UNS	A04
85	Sample_103	4	26	0.0346667	NA	NA	NA	Sample_103	AI_export_Plate 2 UNS LN_A4_A04_CD8p_CD8_live.fcs	RZg17_Control_12_UNS	Control	RZg17	twelve	Control_twelve	UNS	A04
86	Sample_103	5	126	0.168	18.4772	18.8724	1.73839	Sample_103	AI_export_Plate 2 UNS LN_A4_A04_CD8p_CD8_live.fcs	RZg17_Control_12_UNS	Control	RZg17	twelve	Control_twelve	UNS	A04
87	Sample_103	6	5	0.00666667	NA	NA	NA	Sample_103	AI_export_Plate 2 UNS LN_A4_A04_CD8p_CD8_live.fcs	RZg17_Control_12_UNS	Control	RZg17	twelve	Control_twelve	UNS	A04
88	Sample_103	7	5	0.00666667	19.0034	19.5961	1.30518	Sample_103	AI_export_Plate 2 UNS LN_A4_A04_CD8p_CD8_live.fcs	RZg17_Control_12_UNS	Control	RZg17	twelve	Control_twelve	UNS	A04
89	Sample_103	8	59	0.0786667	12.0624	11.7865	2.15564	Sample_103	AI_export_Plate 2 UNS LN_A4_A04_CD8p_CD8_live.fcs	RZg17_Control_12_UNS	Control	RZg17	twelve	Control_twelve	UNS	A04
90	Sample_103	9	44	0.0586667	16.4223	15.8914	1.55744	Sample_103	AI_export_Plate 2 UNS LN_A4_A04_CD8p_CD8_live.fcs	RZg17_Control_12_UNS	Control	RZg17	twelve	Control_twelve	UNS	A04
91	Sample_104	1	146	0.194667	21.2535	22.0373	4.10383	Sample_104	AI_export_Plate 2 UNS LN_A5_A05_CD8p_CD8_live.fcs	34920_aIL10_12_UNS	aIL10	34920	twelve	aIL10_twelve	UNS	A05
92	Sample_104	10	6	0.008	13.9748	15.2983	3.1958	Sample_104	AI_export_Plate 2 UNS LN_A5_A05_CD8p_CD8_live.fcs	34920_aIL10_12_UNS	aIL10	34920	twelve	aIL10_twelve	UNS	A05
93	Sample_104	11	27	0.036	19.3909	19.5483	0.499	Sample_104	AI_export_Plate 2 UNS LN_A5_A05_CD8p_CD8_live.fcs	34920_aIL10_12_UNS	aIL10	34920	twelve	aIL10_twelve	UNS	A05
94	Sample_104	12	6	0.008	8.70628	8.59374	0.906946	Sample_104	AI_export_Plate 2 UNS LN_A5_A05_CD8p_CD8_live.fcs	34920_aIL10_12_UNS	aIL10	34920	twelve	aIL10_twelve	UNS	A05
95	Sample_104	13	1	0.00133333	NA	NA	NA	Sample_104	AI_export_Plate 2 UNS LN_A5_A05_CD8p_CD8_live.fcs	34920_aIL10_12_UNS	aIL10	34920	twelve	aIL10_twelve	UNS	A05
96	Sample_104	14	2	0.00266667	6.10865e-07	6.10865e-07	1.0346e-08	Sample_104	AI_export_Plate 2 UNS LN_A5_A05_CD8p_CD8_live.fcs	34920_aIL10_12_UNS	aIL10	34920	twelve	aIL10_twelve	UNS	A05
97	Sample_104	15	0	0	NA	NA	NA	Sample_104	AI_export_Plate 2 UNS LN_A5_A05_CD8p_CD8_live.fcs	34920_aIL10_12_UNS	aIL10	34920	twelve	aIL10_twelve	UNS	A05
98	Sample_104	2	209	0.278667	5.3	5.22982	2.92977	Sample_104	AI_export_Plate 2 UNS LN_A5_A05_CD8p_CD8_live.fcs	34920_aIL10_12_UNS	aIL10	34920	twelve	aIL10_twelve	UNS	A05
99	Sample_104	3	127	0.169333	3.78968	3.66676	2.90877	Sample_104	AI_export_Plate 2 UNS LN_A5_A05_CD8p_CD8_live.fcs	34920_aIL10_12_UNS	aIL10	34920	twelve	aIL10_twelve	UNS	A05
100	Sample_104	4	50	0.0666667	2.94997	2.94997	NA	Sample_104	AI_export_Plate 2 UNS LN_A5_A05_CD8p_CD8_live.fcs	34920_aIL10_12_UNS	aIL10	34920	twelve	aIL10_twelve	UNS	A05
101	Sample_104	5	87	0.116	18.2298	18.8425	3.29104	Sample_104	AI_export_Plate 2 UNS LN_A5_A05_CD8p_CD8_live.fcs	34920_aIL10_12_UNS	aIL10	34920	twelve	aIL10_twelve	UNS	A05
102	Sample_104	6	10	0.0133333	NA	NA	NA	Sample_104	AI_export_Plate 2 UNS LN_A5_A05_CD8p_CD8_live.fcs	34920_aIL10_12_UNS	aIL10	34920	twelve	aIL10_twelve	UNS	A05
103	Sample_104	7	13	0.0173333	19.5491	19.5961	0.0765175	Sample_104	AI_export_Plate 2 UNS LN_A5_A05_CD8p_CD8_live.fcs	34920_aIL10_12_UNS	aIL10	34920	twelve	aIL10_twelve	UNS	A05
104	Sample_104	8	52	0.0693333	11.6895	11.8474	1.22538	Sample_104	AI_export_Plate 2 UNS LN_A5_A05_CD8p_CD8_live.fcs	34920_aIL10_12_UNS	aIL10	34920	twelve	aIL10_twelve	UNS	A05
105	Sample_104	9	14	0.0186667	16.2487	15.9309	1.25559	Sample_104	AI_export_Plate 2 UNS LN_A5_A05_CD8p_CD8_live.fcs	34920_aIL10_12_UNS	aIL10	34920	twelve	aIL10_twelve	UNS	A05
106	Sample_105	1	141	0.188	21.3935	21.797	3.35158	Sample_105	AI_export_Plate 2 UNS LN_A6_A06_CD8p_CD8_live.fcs	34930_aIL10_12_UNS	aIL10	34930	twelve	aIL10_twelve	UNS	A06
107	Sample_105	10	16	0.0213333	15.0295	15.587	2.63142	Sample_105	AI_export_Plate 2 UNS LN_A6_A06_CD8p_CD8_live.fcs	34930_aIL10_12_UNS	aIL10	34930	twelve	aIL10_twelve	UNS	A06
108	Sample_105	11	30	0.04	18.9644	19.5483	2.25636	Sample_105	AI_export_Plate 2 UNS LN_A6_A06_CD8p_CD8_live.fcs	34930_aIL10_12_UNS	aIL10	34930	twelve	aIL10_twelve	UNS	A06
109	Sample_105	12	6	0.008	9.01813	8.99073	0.227328	Sample_105	AI_export_Plate 2 UNS LN_A6_A06_CD8p_CD8_live.fcs	34930_aIL10_12_UNS	aIL10	34930	twelve	aIL10_twelve	UNS	A06
110	Sample_105	13	3	0.004	NA	NA	NA	Sample_105	AI_export_Plate 2 UNS LN_A6_A06_CD8p_CD8_live.fcs	34930_aIL10_12_UNS	aIL10	34930	twelve	aIL10_twelve	UNS	A06
111	Sample_105	14	1	0.00133333	0.56396	0.56396	NA	Sample_105	AI_export_Plate 2 UNS LN_A6_A06_CD8p_CD8_live.fcs	34930_aIL10_12_UNS	aIL10	34930	twelve	aIL10_twelve	UNS	A06
112	Sample_105	15	1	0.00133333	9.04525	9.04525	NA	Sample_105	AI_export_Plate 2 UNS LN_A6_A06_CD8p_CD8_live.fcs	34930_aIL10_12_UNS	aIL10	34930	twelve	aIL10_twelve	UNS	A06
113	Sample_105	2	172	0.229333	4.50051	4.53645	2.78952	Sample_105	AI_export_Plate 2 UNS LN_A6_A06_CD8p_CD8_live.fcs	34930_aIL10_12_UNS	aIL10	34930	twelve	aIL10_twelve	UNS	A06
114	Sample_105	3	157	0.209333	3.70781	3.65983	1.9267	Sample_105	AI_export_Plate 2 UNS LN_A6_A06_CD8p_CD8_live.fcs	34930_aIL10_12_UNS	aIL10	34930	twelve	aIL10_twelve	UNS	A06
115	Sample_105	4	43	0.0573333	15.9585	15.9585	NA	Sample_105	AI_export_Plate 2 UNS LN_A6_A06_CD8p_CD8_live.fcs	34930_aIL10_12_UNS	aIL10	34930	twelve	aIL10_twelve	UNS	A06
116	Sample_105	5	91	0.121333	18.2442	18.7618	2.14448	Sample_105	AI_export_Plate 2 UNS LN_A6_A06_CD8p_CD8_live.fcs	34930_aIL10_12_UNS	aIL10	34930	twelve	aIL10_twelve	UNS	A06
117	Sample_105	6	7	0.00933333	NA	NA	NA	Sample_105	AI_export_Plate 2 UNS LN_A6_A06_CD8p_CD8_live.fcs	34930_aIL10_12_UNS	aIL10	34930	twelve	aIL10_twelve	UNS	A06
118	Sample_105	7	14	0.0186667	19.4558	19.5021	0.177611	Sample_105	AI_export_Plate 2 UNS LN_A6_A06_CD8p_CD8_live.fcs	34930_aIL10_12_UNS	aIL10	34930	twelve	aIL10_twelve	UNS	A06
119	Sample_105	8	40	0.0533333	11.9262	12.2882	2.18729	Sample_105	AI_export_Plate 2 UNS LN_A6_A06_CD8p_CD8_live.fcs	34930_aIL10_12_UNS	aIL10	34930	twelve	aIL10_twelve	UNS	A06
120	Sample_105	9	28	0.0373333	16.0632	15.8914	0.777567	Sample_105	AI_export_Plate 2 UNS LN_A6_A06_CD8p_CD8_live.fcs	34930_aIL10_12_UNS	aIL10	34930	twelve	aIL10_twelve	UNS	A06
121	Sample_106	1	119	0.158667	21.4459	21.6872	2.37698	Sample_106	AI_export_Plate 2 UNS LN_A7_A07_CD8p_CD8_live.fcs	REq17_Control_12_UNS	Control	REq17	twelve	Control_twelve	UNS	A07
122	Sample_106	10	13	0.0173333	12.5376	12.0352	3.43897	Sample_106	AI_export_Plate 2 UNS LN_A7_A07_CD8p_CD8_live.fcs	REq17_Control_12_UNS	Control	REq17	twelve	Control_twelve	UNS	A07
123	Sample_106	11	21	0.028	19.2021	19.5483	0.835262	Sample_106	AI_export_Plate 2 UNS LN_A7_A07_CD8p_CD8_live.fcs	REq17_Control_12_UNS	Control	REq17	twelve	Control_twelve	UNS	A07
124	Sample_106	12	21	0.028	9.05941	8.40946	2.05268	Sample_106	AI_export_Plate 2 UNS LN_A7_A07_CD8p_CD8_live.fcs	REq17_Control_12_UNS	Control	REq17	twelve	Control_twelve	UNS	A07
125	Sample_106	13	4	0.00533333	NA	NA	NA	Sample_106	AI_export_Plate 2 UNS LN_A7_A07_CD8p_CD8_live.fcs	REq17_Control_12_UNS	Control	REq17	twelve	Control_twelve	UNS	A07
126	Sample_106	14	1	0.00133333	0.56396	0.56396	NA	Sample_106	AI_export_Plate 2 UNS LN_A7_A07_CD8p_CD8_live.fcs	REq17_Control_12_UNS	Control	REq17	twelve	Control_twelve	UNS	A07
127	Sample_106	15	0	0	NA	NA	NA	Sample_106	AI_export_Plate 2 UNS LN_A7_A07_CD8p_CD8_live.fcs	REq17_Control_12_UNS	Control	REq17	twelve	Control_twelve	UNS	A07
128	Sample_106	2	195	0.26	4.70807	4.70599	2.46767	Sample_106	AI_export_Plate 2 UNS LN_A7_A07_CD8p_CD8_live.fcs	REq17_Control_12_UNS	Control	REq17	twelve	Control_twelve	UNS	A07
129	Sample_106	3	134	0.178667	3.78549	3.36178	2.5477	Sample_106	AI_export_Plate 2 UNS LN_A7_A07_CD8p_CD8_live.fcs	REq17_Control_12_UNS	Control	REq17	twelve	Control_twelve	UNS	A07
130	Sample_106	4	40	0.0533333	19.3833	19.3833	NA	Sample_106	AI_export_Plate 2 UNS LN_A7_A07_CD8p_CD8_live.fcs	REq17_Control_12_UNS	Control	REq17	twelve	Control_twelve	UNS	A07
131	Sample_106	5	100	0.133333	18.3453	18.8002	2.4963	Sample_106	AI_export_Plate 2 UNS LN_A7_A07_CD8p_CD8_live.fcs	REq17_Control_12_UNS	Control	REq17	twelve	Control_twelve	UNS	A07
132	Sample_106	6	5	0.00666667	NA	NA	NA	Sample_106	AI_export_Plate 2 UNS LN_A7_A07_CD8p_CD8_live.fcs	REq17_Control_12_UNS	Control	REq17	twelve	Control_twelve	UNS	A07
133	Sample_106	7	26	0.0346667	19.5536	19.5961	0.133017	Sample_106	AI_export_Plate 2 UNS LN_A7_A07_CD8p_CD8_live.fcs	REq17_Control_12_UNS	Control	REq17	twelve	Control_twelve	UNS	A07
134	Sample_106	8	42	0.056	12.4012	11.9921	2.38982	Sample_106	AI_export_Plate 2 UNS LN_A7_A07_CD8p_CD8_live.fcs	REq17_Control_12_UNS	Control	REq17	twelve	Control_twelve	UNS	A07
135	Sample_106	9	29	0.0386667	16.1754	15.8914	2.17781	Sample_106	AI_export_Plate 2 UNS LN_A7_A07_CD8p_CD8_live.fcs	REq17_Control_12_UNS	Control	REq17	twelve	Control_twelve	UNS	A07
136	Sample_107	1	197	0.262667	21.8804	22.3077	2.41761	Sample_107	AI_export_Plate 2 UNS LN_A8_A08_CD8p_CD8_live.fcs	RWs17_aIL10+aPD1_12_UNS	aIL10+aPD1	RWs17	twelve	aIL10+aPD1_twelve	UNS	A08
137	Sample_107	10	12	0.016	16.1891	16.2421	0.909914	Sample_107	AI_export_Plate 2 UNS LN_A8_A08_CD8p_CD8_live.fcs	RWs17_aIL10+aPD1_12_UNS	aIL10+aPD1	RWs17	twelve	aIL10+aPD1_twelve	UNS	A08
138	Sample_107	11	34	0.0453333	18.7867	19.5483	2.5769	Sample_107	AI_export_Plate 2 UNS LN_A8_A08_CD8p_CD8_live.fcs	RWs17_aIL10+aPD1_12_UNS	aIL10+aPD1	RWs17	twelve	aIL10+aPD1_twelve	UNS	A08
139	Sample_107	12	9	0.012	9.10635	8.40946	1.65296	Sample_107	AI_export_Plate 2 UNS LN_A8_A08_CD8p_CD8_live.fcs	RWs17_aIL10+aPD1_12_UNS	aIL10+aPD1	RWs17	twelve	aIL10+aPD1_twelve	UNS	A08
140	Sample_107	13	3	0.004	NA	NA	NA	Sample_107	AI_export_Plate 2 UNS LN_A8_A08_CD8p_CD8_live.fcs	RWs17_aIL10+aPD1_12_UNS	aIL10+aPD1	RWs17	twelve	aIL10+aPD1_twelve	UNS	A08
141	Sample_107	14	1	0.00133333	0.56396	0.56396	NA	Sample_107	AI_export_Plate 2 UNS LN_A8_A08_CD8p_CD8_live.fcs	RWs17_aIL10+aPD1_12_UNS	aIL10+aPD1	RWs17	twelve	aIL10+aPD1_twelve	UNS	A08
142	Sample_107	15	2	0.00266667	9.19389	9.19389	0.210218	Sample_107	AI_export_Plate 2 UNS LN_A8_A08_CD8p_CD8_live.fcs	RWs17_aIL10+aPD1_12_UNS	aIL10+aPD1	RWs17	twelve	aIL10+aPD1_twelve	UNS	A08
143	Sample_107	2	138	0.184	4.34519	4.40505	3.0014	Sample_107	AI_export_Plate 2 UNS LN_A8_A08_CD8p_CD8_live.fcs	RWs17_aIL10+aPD1_12_UNS	aIL10+aPD1	RWs17	twelve	aIL10+aPD1_twelve	UNS	A08
144	Sample_107	3	123	0.164	4.18551	3.66676	2.10772	Sample_107	AI_export_Plate 2 UNS LN_A8_A08_CD8p_CD8_live.fcs	RWs17_aIL10+aPD1_12_UNS	aIL10+aPD1	RWs17	twelve	aIL10+aPD1_twelve	UNS	A08
145	Sample_107	4	61	0.0813333	12.829	12.829	NA	Sample_107	AI_export_Plate 2 UNS LN_A8_A08_CD8p_CD8_live.fcs	RWs17_aIL10+aPD1_12_UNS	aIL10+aPD1	RWs17	twelve	aIL10+aPD1_twelve	UNS	A08
146	Sample_107	5	86	0.114667	18.9766	19.2006	1.18365	Sample_107	AI_export_Plate 2 UNS LN_A8_A08_CD8p_CD8_live.fcs	RWs17_aIL10+aPD1_12_UNS	aIL10+aPD1	RWs17	twelve	aIL10+aPD1_twelve	UNS	A08
147	Sample_107	6	18	0.024	NA	NA	NA	Sample_107	AI_export_Plate 2 UNS LN_A8_A08_CD8p_CD8_live.fcs	RWs17_aIL10+aPD1_12_UNS	aIL10+aPD1	RWs17	twelve	aIL10+aPD1_twelve	UNS	A08
148	Sample_107	7	24	0.032	19.4643	19.5495	0.214781	Sample_107	AI_export_Plate 2 UNS LN_A8_A08_CD8p_CD8_live.fcs	RWs17_aIL10+aPD1_12_UNS	aIL10+aPD1	RWs17	twelve	aIL10+aPD1_twelve	UNS	A08
149	Sample_107	8	16	0.0213333	11.6871	11.8479	0.967679	Sample_107	AI_export_Plate 2 UNS LN_A8_A08_CD8p_CD8_live.fcs	RWs17_aIL10+aPD1_12_UNS	aIL10+aPD1	RWs17	twelve	aIL10+aPD1_twelve	UNS	A08
150	Sample_107	9	26	0.0346667	16.3653	15.8914	1.87452	Sample_107	AI_export_Plate 2 UNS LN_A8_A08_CD8p_CD8_live.fcs	RWs17_aIL10+aPD1_12_UNS	aIL10+aPD1	RWs17	twelve	aIL10+aPD1_twelve	UNS	A08
151	Sample_108	1	76	0.101333	21.4469	22.0315	2.91097	Sample_108	AI_export_Plate 2 UNS LN_A9_A09_CD8p_CD8_live.fcs	34918_aIL10+aPD1_21_UNS	aIL10+aPD1	34918	twenty_one	aIL10+aPD1_twenty_one	UNS	A09
152	Sample_108	10	62	0.0826667	15.9113	16.7603	2.44149	Sample_108	AI_export_Plate 2 UNS LN_A9_A09_CD8p_CD8_live.fcs	34918_aIL10+aPD1_21_UNS	aIL10+aPD1	34918	twenty_one	aIL10+aPD1_twenty_one	UNS	A09
153	Sample_108	11	13	0.0173333	19.5559	19.5483	0.0186067	Sample_108	AI_export_Plate 2 UNS LN_A9_A09_CD8p_CD8_live.fcs	34918_aIL10+aPD1_21_UNS	aIL10+aPD1	34918	twenty_one	aIL10+aPD1_twenty_one	UNS	A09
154	Sample_108	12	25	0.0333333	8.28867	8.29891	2.24029	Sample_108	AI_export_Plate 2 UNS LN_A9_A09_CD8p_CD8_live.fcs	34918_aIL10+aPD1_21_UNS	aIL10+aPD1	34918	twenty_one	aIL10+aPD1_twenty_one	UNS	A09
155	Sample_108	13	24	0.032	NA	NA	NA	Sample_108	AI_export_Plate 2 UNS LN_A9_A09_CD8p_CD8_live.fcs	34918_aIL10+aPD1_21_UNS	aIL10+aPD1	34918	twenty_one	aIL10+aPD1_twenty_one	UNS	A09
156	Sample_108	14	0	0	NA	NA	NA	Sample_108	AI_export_Plate 2 UNS LN_A9_A09_CD8p_CD8_live.fcs	34918_aIL10+aPD1_21_UNS	aIL10+aPD1	34918	twenty_one	aIL10+aPD1_twenty_one	UNS	A09
157	Sample_108	15	3	0.004	24.7633	24.7633	NA	Sample_108	AI_export_Plate 2 UNS LN_A9_A09_CD8p_CD8_live.fcs	34918_aIL10+aPD1_21_UNS	aIL10+aPD1	34918	twenty_one	aIL10+aPD1_twenty_one	UNS	A09
158	Sample_108	2	155	0.206667	4.17176	4.2862	1.99945	Sample_108	AI_export_Plate 2 UNS LN_A9_A09_CD8p_CD8_live.fcs	34918_aIL10+aPD1_21_UNS	aIL10+aPD1	34918	twenty_one	aIL10+aPD1_twenty_one	UNS	A09
159	Sample_108	3	195	0.26	3.90664	3.53198	2.09407	Sample_108	AI_export_Plate 2 UNS LN_A9_A09_CD8p_CD8_live.fcs	34918_aIL10+aPD1_21_UNS	aIL10+aPD1	34918	twenty_one	aIL10+aPD1_twenty_one	UNS	A09
160	Sample_108	4	92	0.122667	15.8914	15.8914	NA	Sample_108	AI_export_Plate 2 UNS LN_A9_A09_CD8p_CD8_live.fcs	34918_aIL10+aPD1_21_UNS	aIL10+aPD1	34918	twenty_one	aIL10+aPD1_twenty_one	UNS	A09
161	Sample_108	5	39	0.052	18.6173	19.2166	1.99825	Sample_108	AI_export_Plate 2 UNS LN_A9_A09_CD8p_CD8_live.fcs	34918_aIL10+aPD1_21_UNS	aIL10+aPD1	34918	twenty_one	aIL10+aPD1_twenty_one	UNS	A09
162	Sample_108	6	22	0.0293333	NA	NA	NA	Sample_108	AI_export_Plate 2 UNS LN_A9_A09_CD8p_CD8_live.fcs	34918_aIL10+aPD1_21_UNS	aIL10+aPD1	34918	twenty_one	aIL10+aPD1_twenty_one	UNS	A09
163	Sample_108	7	18	0.024	19.4605	19.5961	0.219079	Sample_108	AI_export_Plate 2 UNS LN_A9_A09_CD8p_CD8_live.fcs	34918_aIL10+aPD1_21_UNS	aIL10+aPD1	34918	twenty_one	aIL10+aPD1_twenty_one	UNS	A09
164	Sample_108	8	7	0.00933333	11.937	12.5798	1.41654	Sample_108	AI_export_Plate 2 UNS LN_A9_A09_CD8p_CD8_live.fcs	34918_aIL10+aPD1_21_UNS	aIL10+aPD1	34918	twenty_one	aIL10+aPD1_twenty_one	UNS	A09
165	Sample_108	9	19	0.0253333	16.0273	15.8914	1.01267	Sample_108	AI_export_Plate 2 UNS LN_A9_A09_CD8p_CD8_live.fcs	34918_aIL10+aPD1_21_UNS	aIL10+aPD1	34918	twenty_one	aIL10+aPD1_twenty_one	UNS	A09
166	Sample_109	1	48	0.064	20.8927	21.0565	2.4324	Sample_109	AI_export_Plate 2 UNS LN_B1_B01_CD8p_CD8_live.fcs	RKq17_aIL10+aPD1_21_UNS	aIL10+aPD1	RKq17	twenty_one	aIL10+aPD1_twenty_one	UNS	B01
167	Sample_109	10	19	0.0253333	15.5535	16.262	2.80026	Sample_109	AI_export_Plate 2 UNS LN_B1_B01_CD8p_CD8_live.fcs	RKq17_aIL10+aPD1_21_UNS	aIL10+aPD1	RKq17	twenty_one	aIL10+aPD1_twenty_one	UNS	B01
168	Sample_109	11	12	0.016	19.4887	19.5483	0.22525	Sample_109	AI_export_Plate 2 UNS LN_B1_B01_CD8p_CD8_live.fcs	RKq17_aIL10+aPD1_21_UNS	aIL10+aPD1	RKq17	twenty_one	aIL10+aPD1_twenty_one	UNS	B01
169	Sample_109	12	24	0.032	9.06543	8.47562	1.45395	Sample_109	AI_export_Plate 2 UNS LN_B1_B01_CD8p_CD8_live.fcs	RKq17_aIL10+aPD1_21_UNS	aIL10+aPD1	RKq17	twenty_one	aIL10+aPD1_twenty_one	UNS	B01
170	Sample_109	13	2	0.00266667	NA	NA	NA	Sample_109	AI_export_Plate 2 UNS LN_B1_B01_CD8p_CD8_live.fcs	RKq17_aIL10+aPD1_21_UNS	aIL10+aPD1	RKq17	twenty_one	aIL10+aPD1_twenty_one	UNS	B01
171	Sample_109	14	4	0.00533333	5.86301	0.56396	9.67075	Sample_109	AI_export_Plate 2 UNS LN_B1_B01_CD8p_CD8_live.fcs	RKq17_aIL10+aPD1_21_UNS	aIL10+aPD1	RKq17	twenty_one	aIL10+aPD1_twenty_one	UNS	B01
172	Sample_109	15	0	0	NA	NA	NA	Sample_109	AI_export_Plate 2 UNS LN_B1_B01_CD8p_CD8_live.fcs	RKq17_aIL10+aPD1_21_UNS	aIL10+aPD1	RKq17	twenty_one	aIL10+aPD1_twenty_one	UNS	B01
173	Sample_109	2	265	0.353333	4.43817	4.52145	2.52888	Sample_109	AI_export_Plate 2 UNS LN_B1_B01_CD8p_CD8_live.fcs	RKq17_aIL10+aPD1_21_UNS	aIL10+aPD1	RKq17	twenty_one	aIL10+aPD1_twenty_one	UNS	B01
174	Sample_109	3	168	0.224	4.00419	3.4563	2.8435	Sample_109	AI_export_Plate 2 UNS LN_B1_B01_CD8p_CD8_live.fcs	RKq17_aIL10+aPD1_21_UNS	aIL10+aPD1	RKq17	twenty_one	aIL10+aPD1_twenty_one	UNS	B01
175	Sample_109	4	67	0.0893333	8.05461	8.05461	NA	Sample_109	AI_export_Plate 2 UNS LN_B1_B01_CD8p_CD8_live.fcs	RKq17_aIL10+aPD1_21_UNS	aIL10+aPD1	RKq17	twenty_one	aIL10+aPD1_twenty_one	UNS	B01
176	Sample_109	5	60	0.08	17.9033	18.3189	2.17493	Sample_109	AI_export_Plate 2 UNS LN_B1_B01_CD8p_CD8_live.fcs	RKq17_aIL10+aPD1_21_UNS	aIL10+aPD1	RKq17	twenty_one	aIL10+aPD1_twenty_one	UNS	B01
177	Sample_109	6	13	0.0173333	NA	NA	NA	Sample_109	AI_export_Plate 2 UNS LN_B1_B01_CD8p_CD8_live.fcs	RKq17_aIL10+aPD1_21_UNS	aIL10+aPD1	RKq17	twenty_one	aIL10+aPD1_twenty_one	UNS	B01
178	Sample_109	7	12	0.016	19.48	19.5901	0.185424	Sample_109	AI_export_Plate 2 UNS LN_B1_B01_CD8p_CD8_live.fcs	RKq17_aIL10+aPD1_21_UNS	aIL10+aPD1	RKq17	twenty_one	aIL10+aPD1_twenty_one	UNS	B01
179	Sample_109	8	43	0.0573333	11.7778	11.8342	1.28092	Sample_109	AI_export_Plate 2 UNS LN_B1_B01_CD8p_CD8_live.fcs	RKq17_aIL10+aPD1_21_UNS	aIL10+aPD1	RKq17	twenty_one	aIL10+aPD1_twenty_one	UNS	B01
180	Sample_109	9	13	0.0173333	15.5307	15.4827	0.925766	Sample_109	AI_export_Plate 2 UNS LN_B1_B01_CD8p_CD8_live.fcs	RKq17_aIL10+aPD1_21_UNS	aIL10+aPD1	RKq17	twenty_one	aIL10+aPD1_twenty_one	UNS	B01
181	Sample_11	1	179	0.238667	21.9941	22.442	2.64667	Sample_11	AI_export_Plate 1 UNS LN_A8_A08_CD8p_CD8_live.fcs	34897_aIL10_-1_UNS	aIL10	34897	minus_one	aIL10_minus_one	UNS	A08
182	Sample_11	10	15	0.02	15.6884	16.0247	2.75496	Sample_11	AI_export_Plate 1 UNS LN_A8_A08_CD8p_CD8_live.fcs	34897_aIL10_-1_UNS	aIL10	34897	minus_one	aIL10_minus_one	UNS	A08
183	Sample_11	11	47	0.0626667	18.9029	19.5483	2.16421	Sample_11	AI_export_Plate 1 UNS LN_A8_A08_CD8p_CD8_live.fcs	34897_aIL10_-1_UNS	aIL10	34897	minus_one	aIL10_minus_one	UNS	A08
184	Sample_11	12	17	0.0226667	10.3336	9.05474	4.05554	Sample_11	AI_export_Plate 1 UNS LN_A8_A08_CD8p_CD8_live.fcs	34897_aIL10_-1_UNS	aIL10	34897	minus_one	aIL10_minus_one	UNS	A08
185	Sample_11	13	5	0.00666667	NA	NA	NA	Sample_11	AI_export_Plate 1 UNS LN_A8_A08_CD8p_CD8_live.fcs	34897_aIL10_-1_UNS	aIL10	34897	minus_one	aIL10_minus_one	UNS	A08
186	Sample_11	14	0	0	NA	NA	NA	Sample_11	AI_export_Plate 1 UNS LN_A8_A08_CD8p_CD8_live.fcs	34897_aIL10_-1_UNS	aIL10	34897	minus_one	aIL10_minus_one	UNS	A08
187	Sample_11	15	0	0	NA	NA	NA	Sample_11	AI_export_Plate 1 UNS LN_A8_A08_CD8p_CD8_live.fcs	34897_aIL10_-1_UNS	aIL10	34897	minus_one	aIL10_minus_one	UNS	A08
188	Sample_11	2	147	0.196	4.51356	4.52145	2.9765	Sample_11	AI_export_Plate 1 UNS LN_A8_A08_CD8p_CD8_live.fcs	34897_aIL10_-1_UNS	aIL10	34897	minus_one	aIL10_minus_one	UNS	A08
189	Sample_11	3	44	0.0586667	3.81249	3.60242	2.41012	Sample_11	AI_export_Plate 1 UNS LN_A8_A08_CD8p_CD8_live.fcs	34897_aIL10_-1_UNS	aIL10	34897	minus_one	aIL10_minus_one	UNS	A08
190	Sample_11	4	41	0.0546667	NA	NA	NA	Sample_11	AI_export_Plate 1 UNS LN_A8_A08_CD8p_CD8_live.fcs	34897_aIL10_-1_UNS	aIL10	34897	minus_one	aIL10_minus_one	UNS	A08
191	Sample_11	5	158	0.210667	18.4855	18.6339	1.22922	Sample_11	AI_export_Plate 1 UNS LN_A8_A08_CD8p_CD8_live.fcs	34897_aIL10_-1_UNS	aIL10	34897	minus_one	aIL10_minus_one	UNS	A08
192	Sample_11	6	12	0.016	19.5021	19.5021	NA	Sample_11	AI_export_Plate 1 UNS LN_A8_A08_CD8p_CD8_live.fcs	34897_aIL10_-1_UNS	aIL10	34897	minus_one	aIL10_minus_one	UNS	A08
193	Sample_11	7	26	0.0346667	19.5262	19.5961	0.168962	Sample_11	AI_export_Plate 1 UNS LN_A8_A08_CD8p_CD8_live.fcs	34897_aIL10_-1_UNS	aIL10	34897	minus_one	aIL10_minus_one	UNS	A08
194	Sample_11	8	40	0.0533333	12.4843	12.0812	3.00502	Sample_11	AI_export_Plate 1 UNS LN_A8_A08_CD8p_CD8_live.fcs	34897_aIL10_-1_UNS	aIL10	34897	minus_one	aIL10_minus_one	UNS	A08
195	Sample_11	9	19	0.0253333	15.9678	15.7976	0.597408	Sample_11	AI_export_Plate 1 UNS LN_A8_A08_CD8p_CD8_live.fcs	34897_aIL10_-1_UNS	aIL10	34897	minus_one	aIL10_minus_one	UNS	A08
196	Sample_110	1	97	0.129333	21.2613	21.7313	3.61834	Sample_110	AI_export_Plate 2 UNS LN_B10_B10_CD8p_CD8_live.fcs	34918_aIL10+aPD1_36_UNS	aIL10+aPD1	34918	thirty_six	aIL10+aPD1_thirty_six	UNS	B10
197	Sample_110	10	51	0.068	16.3081	16.6688	1.93193	Sample_110	AI_export_Plate 2 UNS LN_B10_B10_CD8p_CD8_live.fcs	34918_aIL10+aPD1_36_UNS	aIL10+aPD1	34918	thirty_six	aIL10+aPD1_thirty_six	UNS	B10
198	Sample_110	11	18	0.024	19.5864	19.5483	0.478983	Sample_110	AI_export_Plate 2 UNS LN_B10_B10_CD8p_CD8_live.fcs	34918_aIL10+aPD1_36_UNS	aIL10+aPD1	34918	thirty_six	aIL10+aPD1_thirty_six	UNS	B10
199	Sample_110	12	14	0.0186667	8.37371	8.32904	0.907169	Sample_110	AI_export_Plate 2 UNS LN_B10_B10_CD8p_CD8_live.fcs	34918_aIL10+aPD1_36_UNS	aIL10+aPD1	34918	thirty_six	aIL10+aPD1_thirty_six	UNS	B10
200	Sample_110	13	19	0.0253333	17.8911	17.8911	NA	Sample_110	AI_export_Plate 2 UNS LN_B10_B10_CD8p_CD8_live.fcs	34918_aIL10+aPD1_36_UNS	aIL10+aPD1	34918	thirty_six	aIL10+aPD1_thirty_six	UNS	B10
201	Sample_110	14	1	0.00133333	0.56396	0.56396	NA	Sample_110	AI_export_Plate 2 UNS LN_B10_B10_CD8p_CD8_live.fcs	34918_aIL10+aPD1_36_UNS	aIL10+aPD1	34918	thirty_six	aIL10+aPD1_thirty_six	UNS	B10
202	Sample_110	15	3	0.004	NA	NA	NA	Sample_110	AI_export_Plate 2 UNS LN_B10_B10_CD8p_CD8_live.fcs	34918_aIL10+aPD1_36_UNS	aIL10+aPD1	34918	thirty_six	aIL10+aPD1_thirty_six	UNS	B10
203	Sample_110	2	141	0.188	4.25864	4.51432	2.0333	Sample_110	AI_export_Plate 2 UNS LN_B10_B10_CD8p_CD8_live.fcs	34918_aIL10+aPD1_36_UNS	aIL10+aPD1	34918	thirty_six	aIL10+aPD1_thirty_six	UNS	B10
204	Sample_110	3	152	0.202667	3.72857	3.5051	2.42597	Sample_110	AI_export_Plate 2 UNS LN_B10_B10_CD8p_CD8_live.fcs	34918_aIL10+aPD1_36_UNS	aIL10+aPD1	34918	thirty_six	aIL10+aPD1_thirty_six	UNS	B10
205	Sample_110	4	96	0.128	14.5114	17.8799	6.49597	Sample_110	AI_export_Plate 2 UNS LN_B10_B10_CD8p_CD8_live.fcs	34918_aIL10+aPD1_36_UNS	aIL10+aPD1	34918	thirty_six	aIL10+aPD1_thirty_six	UNS	B10
206	Sample_110	5	57	0.076	18.5659	18.7529	2.07132	Sample_110	AI_export_Plate 2 UNS LN_B10_B10_CD8p_CD8_live.fcs	34918_aIL10+aPD1_36_UNS	aIL10+aPD1	34918	thirty_six	aIL10+aPD1_thirty_six	UNS	B10
207	Sample_110	6	40	0.0533333	19.5961	19.5961	NA	Sample_110	AI_export_Plate 2 UNS LN_B10_B10_CD8p_CD8_live.fcs	34918_aIL10+aPD1_36_UNS	aIL10+aPD1	34918	thirty_six	aIL10+aPD1_thirty_six	UNS	B10
208	Sample_110	7	25	0.0333333	19.3705	19.5021	0.340794	Sample_110	AI_export_Plate 2 UNS LN_B10_B10_CD8p_CD8_live.fcs	34918_aIL10+aPD1_36_UNS	aIL10+aPD1	34918	thirty_six	aIL10+aPD1_thirty_six	UNS	B10
209	Sample_110	8	14	0.0186667	11.5403	11.7963	1.36755	Sample_110	AI_export_Plate 2 UNS LN_B10_B10_CD8p_CD8_live.fcs	34918_aIL10+aPD1_36_UNS	aIL10+aPD1	34918	thirty_six	aIL10+aPD1_thirty_six	UNS	B10
210	Sample_110	9	22	0.0293333	16.1914	15.8914	1.43671	Sample_110	AI_export_Plate 2 UNS LN_B10_B10_CD8p_CD8_live.fcs	34918_aIL10+aPD1_36_UNS	aIL10+aPD1	34918	thirty_six	aIL10+aPD1_thirty_six	UNS	B10
211	Sample_111	1	83	0.110667	20.535	21.7238	4.40382	Sample_111	AI_export_Plate 2 UNS LN_B11_B11_CD8p_CD8_live.fcs	RBf17_aIL10+aPD1_36_UNS	aIL10+aPD1	RBf17	thirty_six	aIL10+aPD1_thirty_six	UNS	B11
212	Sample_111	10	33	0.044	15.657	15.7355	0.681549	Sample_111	AI_export_Plate 2 UNS LN_B11_B11_CD8p_CD8_live.fcs	RBf17_aIL10+aPD1_36_UNS	aIL10+aPD1	RBf17	thirty_six	aIL10+aPD1_thirty_six	UNS	B11
213	Sample_111	11	5	0.00666667	19.9849	19.5483	0.976284	Sample_111	AI_export_Plate 2 UNS LN_B11_B11_CD8p_CD8_live.fcs	RBf17_aIL10+aPD1_36_UNS	aIL10+aPD1	RBf17	thirty_six	aIL10+aPD1_thirty_six	UNS	B11
214	Sample_111	12	16	0.0213333	9.25081	8.66809	2.12003	Sample_111	AI_export_Plate 2 UNS LN_B11_B11_CD8p_CD8_live.fcs	RBf17_aIL10+aPD1_36_UNS	aIL10+aPD1	RBf17	thirty_six	aIL10+aPD1_thirty_six	UNS	B11
215	Sample_111	13	4	0.00533333	NA	NA	NA	Sample_111	AI_export_Plate 2 UNS LN_B11_B11_CD8p_CD8_live.fcs	RBf17_aIL10+aPD1_36_UNS	aIL10+aPD1	RBf17	thirty_six	aIL10+aPD1_thirty_six	UNS	B11
216	Sample_111	14	2	0.00266667	NA	NA	NA	Sample_111	AI_export_Plate 2 UNS LN_B11_B11_CD8p_CD8_live.fcs	RBf17_aIL10+aPD1_36_UNS	aIL10+aPD1	RBf17	thirty_six	aIL10+aPD1_thirty_six	UNS	B11
217	Sample_111	15	1	0.00133333	9.34254	9.34254	NA	Sample_111	AI_export_Plate 2 UNS LN_B11_B11_CD8p_CD8_live.fcs	RBf17_aIL10+aPD1_36_UNS	aIL10+aPD1	RBf17	thirty_six	aIL10+aPD1_thirty_six	UNS	B11
218	Sample_111	2	208	0.277333	4.1543	3.95176	2.5881	Sample_111	AI_export_Plate 2 UNS LN_B11_B11_CD8p_CD8_live.fcs	RBf17_aIL10+aPD1_36_UNS	aIL10+aPD1	RBf17	thirty_six	aIL10+aPD1_thirty_six	UNS	B11
219	Sample_111	3	207	0.276	4.07677	3.66676	2.56521	Sample_111	AI_export_Plate 2 UNS LN_B11_B11_CD8p_CD8_live.fcs	RBf17_aIL10+aPD1_36_UNS	aIL10+aPD1	RBf17	thirty_six	aIL10+aPD1_thirty_six	UNS	B11
220	Sample_111	4	71	0.0946667	NA	NA	NA	Sample_111	AI_export_Plate 2 UNS LN_B11_B11_CD8p_CD8_live.fcs	RBf17_aIL10+aPD1_36_UNS	aIL10+aPD1	RBf17	thirty_six	aIL10+aPD1_thirty_six	UNS	B11
221	Sample_111	5	70	0.0933333	18.6265	19.0625	2.14247	Sample_111	AI_export_Plate 2 UNS LN_B11_B11_CD8p_CD8_live.fcs	RBf17_aIL10+aPD1_36_UNS	aIL10+aPD1	RBf17	thirty_six	aIL10+aPD1_thirty_six	UNS	B11
222	Sample_111	6	10	0.0133333	NA	NA	NA	Sample_111	AI_export_Plate 2 UNS LN_B11_B11_CD8p_CD8_live.fcs	RBf17_aIL10+aPD1_36_UNS	aIL10+aPD1	RBf17	thirty_six	aIL10+aPD1_thirty_six	UNS	B11
223	Sample_111	7	4	0.00533333	19.4099	19.4906	0.252112	Sample_111	AI_export_Plate 2 UNS LN_B11_B11_CD8p_CD8_live.fcs	RBf17_aIL10+aPD1_36_UNS	aIL10+aPD1	RBf17	thirty_six	aIL10+aPD1_thirty_six	UNS	B11
224	Sample_111	8	6	0.008	11.8496	11.9897	0.827326	Sample_111	AI_export_Plate 2 UNS LN_B11_B11_CD8p_CD8_live.fcs	RBf17_aIL10+aPD1_36_UNS	aIL10+aPD1	RBf17	thirty_six	aIL10+aPD1_thirty_six	UNS	B11
225	Sample_111	9	30	0.04	15.7077	15.6823	1.06203	Sample_111	AI_export_Plate 2 UNS LN_B11_B11_CD8p_CD8_live.fcs	RBf17_aIL10+aPD1_36_UNS	aIL10+aPD1	RBf17	thirty_six	aIL10+aPD1_thirty_six	UNS	B11
226	Sample_112	1	79	0.105333	21.8638	22.4208	3.22545	Sample_112	AI_export_Plate 2 UNS LN_B12_B12_CD8p_CD8_live.fcs	RBv17_aIL10+aPD1_36_UNS	aIL10+aPD1	RBv17	thirty_six	aIL10+aPD1_thirty_six	UNS	B12
227	Sample_112	10	14	0.0186667	13.3272	14.8072	3.3743	Sample_112	AI_export_Plate 2 UNS LN_B12_B12_CD8p_CD8_live.fcs	RBv17_aIL10+aPD1_36_UNS	aIL10+aPD1	RBv17	thirty_six	aIL10+aPD1_thirty_six	UNS	B12
228	Sample_112	11	16	0.0213333	17.4643	19.5483	5.38873	Sample_112	AI_export_Plate 2 UNS LN_B12_B12_CD8p_CD8_live.fcs	RBv17_aIL10+aPD1_36_UNS	aIL10+aPD1	RBv17	thirty_six	aIL10+aPD1_thirty_six	UNS	B12
229	Sample_112	12	8	0.0106667	9.7605	9.09398	2.23328	Sample_112	AI_export_Plate 2 UNS LN_B12_B12_CD8p_CD8_live.fcs	RBv17_aIL10+aPD1_36_UNS	aIL10+aPD1	RBv17	thirty_six	aIL10+aPD1_thirty_six	UNS	B12
230	Sample_112	13	3	0.004	17.5335	17.5335	NA	Sample_112	AI_export_Plate 2 UNS LN_B12_B12_CD8p_CD8_live.fcs	RBv17_aIL10+aPD1_36_UNS	aIL10+aPD1	RBv17	thirty_six	aIL10+aPD1_thirty_six	UNS	B12
231	Sample_112	14	2	0.00266667	0.56396	0.56396	NA	Sample_112	AI_export_Plate 2 UNS LN_B12_B12_CD8p_CD8_live.fcs	RBv17_aIL10+aPD1_36_UNS	aIL10+aPD1	RBv17	thirty_six	aIL10+aPD1_thirty_six	UNS	B12
232	Sample_112	15	3	0.004	16.9043	16.9043	11.1143	Sample_112	AI_export_Plate 2 UNS LN_B12_B12_CD8p_CD8_live.fcs	RBv17_aIL10+aPD1_36_UNS	aIL10+aPD1	RBv17	thirty_six	aIL10+aPD1_thirty_six	UNS	B12
233	Sample_112	2	232	0.309333	4.35889	4.44215	2.70973	Sample_112	AI_export_Plate 2 UNS LN_B12_B12_CD8p_CD8_live.fcs	RBv17_aIL10+aPD1_36_UNS	aIL10+aPD1	RBv17	thirty_six	aIL10+aPD1_thirty_six	UNS	B12
234	Sample_112	3	224	0.298667	3.98766	3.66676	2.06644	Sample_112	AI_export_Plate 2 UNS LN_B12_B12_CD8p_CD8_live.fcs	RBv17_aIL10+aPD1_36_UNS	aIL10+aPD1	RBv17	thirty_six	aIL10+aPD1_thirty_six	UNS	B12
235	Sample_112	4	40	0.0533333	NA	NA	NA	Sample_112	AI_export_Plate 2 UNS LN_B12_B12_CD8p_CD8_live.fcs	RBv17_aIL10+aPD1_36_UNS	aIL10+aPD1	RBv17	thirty_six	aIL10+aPD1_thirty_six	UNS	B12
236	Sample_112	5	61	0.0813333	18.629	18.9397	1.89163	Sample_112	AI_export_Plate 2 UNS LN_B12_B12_CD8p_CD8_live.fcs	RBv17_aIL10+aPD1_36_UNS	aIL10+aPD1	RBv17	thirty_six	aIL10+aPD1_thirty_six	UNS	B12
237	Sample_112	6	15	0.02	NA	NA	NA	Sample_112	AI_export_Plate 2 UNS LN_B12_B12_CD8p_CD8_live.fcs	RBv17_aIL10+aPD1_36_UNS	aIL10+aPD1	RBv17	thirty_six	aIL10+aPD1_thirty_six	UNS	B12
238	Sample_112	7	15	0.02	19.5314	19.5961	0.134887	Sample_112	AI_export_Plate 2 UNS LN_B12_B12_CD8p_CD8_live.fcs	RBv17_aIL10+aPD1_36_UNS	aIL10+aPD1	RBv17	thirty_six	aIL10+aPD1_thirty_six	UNS	B12
239	Sample_112	8	22	0.0293333	11.5353	11.5485	1.67329	Sample_112	AI_export_Plate 2 UNS LN_B12_B12_CD8p_CD8_live.fcs	RBv17_aIL10+aPD1_36_UNS	aIL10+aPD1	RBv17	thirty_six	aIL10+aPD1_thirty_six	UNS	B12
240	Sample_112	9	16	0.0213333	15.764	15.9272	1.35194	Sample_112	AI_export_Plate 2 UNS LN_B12_B12_CD8p_CD8_live.fcs	RBv17_aIL10+aPD1_36_UNS	aIL10+aPD1	RBv17	thirty_six	aIL10+aPD1_thirty_six	UNS	B12
241	Sample_113	1	109	0.145333	21.9937	22.9266	3.01885	Sample_113	AI_export_Plate 2 UNS LN_B2_B02_CD8p_CD8_live.fcs	RVc17_aIL10_21_UNS	aIL10	RVc17	twenty_one	aIL10_twenty_one	UNS	B02
242	Sample_113	10	29	0.0386667	15.3367	15.7355	2.54263	Sample_113	AI_export_Plate 2 UNS LN_B2_B02_CD8p_CD8_live.fcs	RVc17_aIL10_21_UNS	aIL10	RVc17	twenty_one	aIL10_twenty_one	UNS	B02
243	Sample_113	11	13	0.0173333	17.4435	19.5483	4.6487	Sample_113	AI_export_Plate 2 UNS LN_B2_B02_CD8p_CD8_live.fcs	RVc17_aIL10_21_UNS	aIL10	RVc17	twenty_one	aIL10_twenty_one	UNS	B02
244	Sample_113	12	7	0.00933333	11.5219	9.04525	5.94257	Sample_113	AI_export_Plate 2 UNS LN_B2_B02_CD8p_CD8_live.fcs	RVc17_aIL10_21_UNS	aIL10	RVc17	twenty_one	aIL10_twenty_one	UNS	B02
245	Sample_113	13	3	0.004	NA	NA	NA	Sample_113	AI_export_Plate 2 UNS LN_B2_B02_CD8p_CD8_live.fcs	RVc17_aIL10_21_UNS	aIL10	RVc17	twenty_one	aIL10_twenty_one	UNS	B02
246	Sample_113	14	2	0.00266667	0.56396	0.56396	NA	Sample_113	AI_export_Plate 2 UNS LN_B2_B02_CD8p_CD8_live.fcs	RVc17_aIL10_21_UNS	aIL10	RVc17	twenty_one	aIL10_twenty_one	UNS	B02
247	Sample_113	15	3	0.004	9.03151	9.34254	0.538713	Sample_113	AI_export_Plate 2 UNS LN_B2_B02_CD8p_CD8_live.fcs	RVc17_aIL10_21_UNS	aIL10	RVc17	twenty_one	aIL10_twenty_one	UNS	B02
248	Sample_113	2	169	0.225333	5.21013	5.17279	3.43624	Sample_113	AI_export_Plate 2 UNS LN_B2_B02_CD8p_CD8_live.fcs	RVc17_aIL10_21_UNS	aIL10	RVc17	twenty_one	aIL10_twenty_one	UNS	B02
249	Sample_113	3	135	0.18	3.84489	3.66676	2.47611	Sample_113	AI_export_Plate 2 UNS LN_B2_B02_CD8p_CD8_live.fcs	RVc17_aIL10_21_UNS	aIL10	RVc17	twenty_one	aIL10_twenty_one	UNS	B02
250	Sample_113	4	106	0.141333	NA	NA	NA	Sample_113	AI_export_Plate 2 UNS LN_B2_B02_CD8p_CD8_live.fcs	RVc17_aIL10_21_UNS	aIL10	RVc17	twenty_one	aIL10_twenty_one	UNS	B02
251	Sample_113	5	66	0.088	18.6147	18.5221	1.17268	Sample_113	AI_export_Plate 2 UNS LN_B2_B02_CD8p_CD8_live.fcs	RVc17_aIL10_21_UNS	aIL10	RVc17	twenty_one	aIL10_twenty_one	UNS	B02
252	Sample_113	6	32	0.0426667	NA	NA	NA	Sample_113	AI_export_Plate 2 UNS LN_B2_B02_CD8p_CD8_live.fcs	RVc17_aIL10_21_UNS	aIL10	RVc17	twenty_one	aIL10_twenty_one	UNS	B02
253	Sample_113	7	16	0.0213333	19.4982	19.5961	0.174692	Sample_113	AI_export_Plate 2 UNS LN_B2_B02_CD8p_CD8_live.fcs	RVc17_aIL10_21_UNS	aIL10	RVc17	twenty_one	aIL10_twenty_one	UNS	B02
254	Sample_113	8	25	0.0333333	11.9128	12.2376	1.72581	Sample_113	AI_export_Plate 2 UNS LN_B2_B02_CD8p_CD8_live.fcs	RVc17_aIL10_21_UNS	aIL10	RVc17	twenty_one	aIL10_twenty_one	UNS	B02
255	Sample_113	9	35	0.0466667	15.9352	15.8914	1.77891	Sample_113	AI_export_Plate 2 UNS LN_B2_B02_CD8p_CD8_live.fcs	RVc17_aIL10_21_UNS	aIL10	RVc17	twenty_one	aIL10_twenty_one	UNS	B02
256	Sample_114	1	230	0.306667	22.3338	23.1596	2.45763	Sample_114	AI_export_Plate 2 UNS LN_B3_B03_CD8p_CD8_live.fcs	RZg17_Control_21_UNS	Control	RZg17	twenty_one	Control_twenty_one	UNS	B03
257	Sample_114	10	37	0.0493333	16.3366	17.058	2.27015	Sample_114	AI_export_Plate 2 UNS LN_B3_B03_CD8p_CD8_live.fcs	RZg17_Control_21_UNS	Control	RZg17	twenty_one	Control_twenty_one	UNS	B03
258	Sample_114	11	25	0.0333333	19.6515	19.5483	0.793022	Sample_114	AI_export_Plate 2 UNS LN_B3_B03_CD8p_CD8_live.fcs	RZg17_Control_21_UNS	Control	RZg17	twenty_one	Control_twenty_one	UNS	B03
259	Sample_114	12	2	0.00266667	8.28422	8.28422	0.15144	Sample_114	AI_export_Plate 2 UNS LN_B3_B03_CD8p_CD8_live.fcs	RZg17_Control_21_UNS	Control	RZg17	twenty_one	Control_twenty_one	UNS	B03
260	Sample_114	13	10	0.0133333	NA	NA	NA	Sample_114	AI_export_Plate 2 UNS LN_B3_B03_CD8p_CD8_live.fcs	RZg17_Control_21_UNS	Control	RZg17	twenty_one	Control_twenty_one	UNS	B03
261	Sample_114	14	2	0.00266667	9.95533	9.95533	13.2814	Sample_114	AI_export_Plate 2 UNS LN_B3_B03_CD8p_CD8_live.fcs	RZg17_Control_21_UNS	Control	RZg17	twenty_one	Control_twenty_one	UNS	B03
262	Sample_114	15	1	0.00133333	9.34254	9.34254	NA	Sample_114	AI_export_Plate 2 UNS LN_B3_B03_CD8p_CD8_live.fcs	RZg17_Control_21_UNS	Control	RZg17	twenty_one	Control_twenty_one	UNS	B03
263	Sample_114	2	108	0.144	4.90989	4.94692	2.49781	Sample_114	AI_export_Plate 2 UNS LN_B3_B03_CD8p_CD8_live.fcs	RZg17_Control_21_UNS	Control	RZg17	twenty_one	Control_twenty_one	UNS	B03
264	Sample_114	3	50	0.0666667	3.90191	3.66676	2.61549	Sample_114	AI_export_Plate 2 UNS LN_B3_B03_CD8p_CD8_live.fcs	RZg17_Control_21_UNS	Control	RZg17	twenty_one	Control_twenty_one	UNS	B03
265	Sample_114	4	74	0.0986667	NA	NA	NA	Sample_114	AI_export_Plate 2 UNS LN_B3_B03_CD8p_CD8_live.fcs	RZg17_Control_21_UNS	Control	RZg17	twenty_one	Control_twenty_one	UNS	B03
266	Sample_114	5	110	0.146667	18.5337	18.7243	1.04289	Sample_114	AI_export_Plate 2 UNS LN_B3_B03_CD8p_CD8_live.fcs	RZg17_Control_21_UNS	Control	RZg17	twenty_one	Control_twenty_one	UNS	B03
267	Sample_114	6	9	0.012	NA	NA	NA	Sample_114	AI_export_Plate 2 UNS LN_B3_B03_CD8p_CD8_live.fcs	RZg17_Control_21_UNS	Control	RZg17	twenty_one	Control_twenty_one	UNS	B03
268	Sample_114	7	18	0.024	19.436	19.5961	0.291782	Sample_114	AI_export_Plate 2 UNS LN_B3_B03_CD8p_CD8_live.fcs	RZg17_Control_21_UNS	Control	RZg17	twenty_one	Control_twenty_one	UNS	B03
269	Sample_114	8	26	0.0346667	12.5931	11.7994	3.69095	Sample_114	AI_export_Plate 2 UNS LN_B3_B03_CD8p_CD8_live.fcs	RZg17_Control_21_UNS	Control	RZg17	twenty_one	Control_twenty_one	UNS	B03
270	Sample_114	9	48	0.064	16.2852	15.9199	1.11744	Sample_114	AI_export_Plate 2 UNS LN_B3_B03_CD8p_CD8_live.fcs	RZg17_Control_21_UNS	Control	RZg17	twenty_one	Control_twenty_one	UNS	B03
271	Sample_115	1	83	0.110667	21.3973	22.3827	3.40825	Sample_115	AI_export_Plate 2 UNS LN_B4_B04_CD8p_CD8_live.fcs	34920_aIL10_21_UNS	aIL10	34920	twenty_one	aIL10_twenty_one	UNS	B04
272	Sample_115	10	25	0.0333333	13.5917	15.7355	4.44893	Sample_115	AI_export_Plate 2 UNS LN_B4_B04_CD8p_CD8_live.fcs	34920_aIL10_21_UNS	aIL10	34920	twenty_one	aIL10_twenty_one	UNS	B04
273	Sample_115	11	19	0.0253333	18.816	19.5483	1.14957	Sample_115	AI_export_Plate 2 UNS LN_B4_B04_CD8p_CD8_live.fcs	34920_aIL10_21_UNS	aIL10	34920	twenty_one	aIL10_twenty_one	UNS	B04
274	Sample_115	12	18	0.024	8.87291	8.99684	1.69894	Sample_115	AI_export_Plate 2 UNS LN_B4_B04_CD8p_CD8_live.fcs	34920_aIL10_21_UNS	aIL10	34920	twenty_one	aIL10_twenty_one	UNS	B04
275	Sample_115	13	16	0.0213333	NA	NA	NA	Sample_115	AI_export_Plate 2 UNS LN_B4_B04_CD8p_CD8_live.fcs	34920_aIL10_21_UNS	aIL10	34920	twenty_one	aIL10_twenty_one	UNS	B04
276	Sample_115	14	0	0	NA	NA	NA	Sample_115	AI_export_Plate 2 UNS LN_B4_B04_CD8p_CD8_live.fcs	34920_aIL10_21_UNS	aIL10	34920	twenty_one	aIL10_twenty_one	UNS	B04
277	Sample_115	15	0	0	NA	NA	NA	Sample_115	AI_export_Plate 2 UNS LN_B4_B04_CD8p_CD8_live.fcs	34920_aIL10_21_UNS	aIL10	34920	twenty_one	aIL10_twenty_one	UNS	B04
278	Sample_115	2	192	0.256	4.97161	4.71621	2.87564	Sample_115	AI_export_Plate 2 UNS LN_B4_B04_CD8p_CD8_live.fcs	34920_aIL10_21_UNS	aIL10	34920	twenty_one	aIL10_twenty_one	UNS	B04
279	Sample_115	3	159	0.212	4.39114	3.80926	3.05023	Sample_115	AI_export_Plate 2 UNS LN_B4_B04_CD8p_CD8_live.fcs	34920_aIL10_21_UNS	aIL10	34920	twenty_one	aIL10_twenty_one	UNS	B04
280	Sample_115	4	67	0.0893333	NA	NA	NA	Sample_115	AI_export_Plate 2 UNS LN_B4_B04_CD8p_CD8_live.fcs	34920_aIL10_21_UNS	aIL10	34920	twenty_one	aIL10_twenty_one	UNS	B04
281	Sample_115	5	52	0.0693333	18.6413	18.8591	1.05619	Sample_115	AI_export_Plate 2 UNS LN_B4_B04_CD8p_CD8_live.fcs	34920_aIL10_21_UNS	aIL10	34920	twenty_one	aIL10_twenty_one	UNS	B04
282	Sample_115	6	33	0.044	NA	NA	NA	Sample_115	AI_export_Plate 2 UNS LN_B4_B04_CD8p_CD8_live.fcs	34920_aIL10_21_UNS	aIL10	34920	twenty_one	aIL10_twenty_one	UNS	B04
283	Sample_115	7	25	0.0333333	19.505	19.5961	0.248044	Sample_115	AI_export_Plate 2 UNS LN_B4_B04_CD8p_CD8_live.fcs	34920_aIL10_21_UNS	aIL10	34920	twenty_one	aIL10_twenty_one	UNS	B04
284	Sample_115	8	52	0.0693333	11.7654	11.811	2.27576	Sample_115	AI_export_Plate 2 UNS LN_B4_B04_CD8p_CD8_live.fcs	34920_aIL10_21_UNS	aIL10	34920	twenty_one	aIL10_twenty_one	UNS	B04
285	Sample_115	9	9	0.012	16.7926	16.2511	1.60396	Sample_115	AI_export_Plate 2 UNS LN_B4_B04_CD8p_CD8_live.fcs	34920_aIL10_21_UNS	aIL10	34920	twenty_one	aIL10_twenty_one	UNS	B04
286	Sample_116	1	32	0.0426667	20.889	21.2996	3.56176	Sample_116	AI_export_Plate 2 UNS LN_B5_B05_CD8p_CD8_live.fcs	34930_aIL10_21_UNS	aIL10	34930	twenty_one	aIL10_twenty_one	UNS	B05
287	Sample_116	10	53	0.0706667	16.6313	16.6948	1.5604	Sample_116	AI_export_Plate 2 UNS LN_B5_B05_CD8p_CD8_live.fcs	34930_aIL10_21_UNS	aIL10	34930	twenty_one	aIL10_twenty_one	UNS	B05
288	Sample_116	11	18	0.024	19.2876	19.5483	0.704321	Sample_116	AI_export_Plate 2 UNS LN_B5_B05_CD8p_CD8_live.fcs	34930_aIL10_21_UNS	aIL10	34930	twenty_one	aIL10_twenty_one	UNS	B05
289	Sample_116	12	6	0.008	8.51466	8.37687	0.614984	Sample_116	AI_export_Plate 2 UNS LN_B5_B05_CD8p_CD8_live.fcs	34930_aIL10_21_UNS	aIL10	34930	twenty_one	aIL10_twenty_one	UNS	B05
290	Sample_116	13	59	0.0786667	NA	NA	NA	Sample_116	AI_export_Plate 2 UNS LN_B5_B05_CD8p_CD8_live.fcs	34930_aIL10_21_UNS	aIL10	34930	twenty_one	aIL10_twenty_one	UNS	B05
291	Sample_116	14	0	0	NA	NA	NA	Sample_116	AI_export_Plate 2 UNS LN_B5_B05_CD8p_CD8_live.fcs	34930_aIL10_21_UNS	aIL10	34930	twenty_one	aIL10_twenty_one	UNS	B05
292	Sample_116	15	1	0.00133333	9.34254	9.34254	NA	Sample_116	AI_export_Plate 2 UNS LN_B5_B05_CD8p_CD8_live.fcs	34930_aIL10_21_UNS	aIL10	34930	twenty_one	aIL10_twenty_one	UNS	B05
293	Sample_116	2	106	0.141333	4.67205	4.71621	2.69917	Sample_116	AI_export_Plate 2 UNS LN_B5_B05_CD8p_CD8_live.fcs	34930_aIL10_21_UNS	aIL10	34930	twenty_one	aIL10_twenty_one	UNS	B05
294	Sample_116	3	66	0.088	3.87877	3.66676	2.58828	Sample_116	AI_export_Plate 2 UNS LN_B5_B05_CD8p_CD8_live.fcs	34930_aIL10_21_UNS	aIL10	34930	twenty_one	aIL10_twenty_one	UNS	B05
295	Sample_116	4	245	0.326667	18.7031	18.7031	6.49939	Sample_116	AI_export_Plate 2 UNS LN_B5_B05_CD8p_CD8_live.fcs	34930_aIL10_21_UNS	aIL10	34930	twenty_one	aIL10_twenty_one	UNS	B05
296	Sample_116	5	32	0.0426667	18.5512	18.4921	0.874962	Sample_116	AI_export_Plate 2 UNS LN_B5_B05_CD8p_CD8_live.fcs	34930_aIL10_21_UNS	aIL10	34930	twenty_one	aIL10_twenty_one	UNS	B05
297	Sample_116	6	83	0.110667	NA	NA	NA	Sample_116	AI_export_Plate 2 UNS LN_B5_B05_CD8p_CD8_live.fcs	34930_aIL10_21_UNS	aIL10	34930	twenty_one	aIL10_twenty_one	UNS	B05
298	Sample_116	7	18	0.024	19.4831	19.5872	0.211118	Sample_116	AI_export_Plate 2 UNS LN_B5_B05_CD8p_CD8_live.fcs	34930_aIL10_21_UNS	aIL10	34930	twenty_one	aIL10_twenty_one	UNS	B05
299	Sample_116	8	19	0.0253333	11.9647	12.5692	1.79303	Sample_116	AI_export_Plate 2 UNS LN_B5_B05_CD8p_CD8_live.fcs	34930_aIL10_21_UNS	aIL10	34930	twenty_one	aIL10_twenty_one	UNS	B05
300	Sample_116	9	12	0.016	15.5268	15.6318	2.89523	Sample_116	AI_export_Plate 2 UNS LN_B5_B05_CD8p_CD8_live.fcs	34930_aIL10_21_UNS	aIL10	34930	twenty_one	aIL10_twenty_one	UNS	B05
301	Sample_117	1	74	0.0986667	21.2204	21.2925	2.22223	Sample_117	AI_export_Plate 2 UNS LN_B6_B06_CD8p_CD8_live.fcs	REq17_Control_21_UNS	Control	REq17	twenty_one	Control_twenty_one	UNS	B06
302	Sample_117	10	50	0.0666667	15.8705	16.2515	2.2594	Sample_117	AI_export_Plate 2 UNS LN_B6_B06_CD8p_CD8_live.fcs	REq17_Control_21_UNS	Control	REq17	twenty_one	Control_twenty_one	UNS	B06
303	Sample_117	11	21	0.028	18.6679	19.5483	3.50743	Sample_117	AI_export_Plate 2 UNS LN_B6_B06_CD8p_CD8_live.fcs	REq17_Control_21_UNS	Control	REq17	twenty_one	Control_twenty_one	UNS	B06
304	Sample_117	12	3	0.004	11.587	13.2126	3.16573	Sample_117	AI_export_Plate 2 UNS LN_B6_B06_CD8p_CD8_live.fcs	REq17_Control_21_UNS	Control	REq17	twenty_one	Control_twenty_one	UNS	B06
305	Sample_117	13	12	0.016	NA	NA	NA	Sample_117	AI_export_Plate 2 UNS LN_B6_B06_CD8p_CD8_live.fcs	REq17_Control_21_UNS	Control	REq17	twenty_one	Control_twenty_one	UNS	B06
306	Sample_117	14	1	0.00133333	3.73103e-07	3.73103e-07	NA	Sample_117	AI_export_Plate 2 UNS LN_B6_B06_CD8p_CD8_live.fcs	REq17_Control_21_UNS	Control	REq17	twenty_one	Control_twenty_one	UNS	B06
307	Sample_117	15	1	0.00133333	9.34254	9.34254	NA	Sample_117	AI_export_Plate 2 UNS LN_B6_B06_CD8p_CD8_live.fcs	REq17_Control_21_UNS	Control	REq17	twenty_one	Control_twenty_one	UNS	B06
308	Sample_117	2	207	0.276	4.52146	4.71621	2.09141	Sample_117	AI_export_Plate 2 UNS LN_B6_B06_CD8p_CD8_live.fcs	REq17_Control_21_UNS	Control	REq17	twenty_one	Control_twenty_one	UNS	B06
309	Sample_117	3	131	0.174667	4.01448	3.60771	2.91959	Sample_117	AI_export_Plate 2 UNS LN_B6_B06_CD8p_CD8_live.fcs	REq17_Control_21_UNS	Control	REq17	twenty_one	Control_twenty_one	UNS	B06
310	Sample_117	4	84	0.112	NA	NA	NA	Sample_117	AI_export_Plate 2 UNS LN_B6_B06_CD8p_CD8_live.fcs	REq17_Control_21_UNS	Control	REq17	twenty_one	Control_twenty_one	UNS	B06
311	Sample_117	5	68	0.0906667	18.3944	18.694	2.61809	Sample_117	AI_export_Plate 2 UNS LN_B6_B06_CD8p_CD8_live.fcs	REq17_Control_21_UNS	Control	REq17	twenty_one	Control_twenty_one	UNS	B06
312	Sample_117	6	24	0.032	NA	NA	NA	Sample_117	AI_export_Plate 2 UNS LN_B6_B06_CD8p_CD8_live.fcs	REq17_Control_21_UNS	Control	REq17	twenty_one	Control_twenty_one	UNS	B06
313	Sample_117	7	25	0.0333333	19.4027	19.5021	0.256796	Sample_117	AI_export_Plate 2 UNS LN_B6_B06_CD8p_CD8_live.fcs	REq17_Control_21_UNS	Control	REq17	twenty_one	Control_twenty_one	UNS	B06
314	Sample_117	8	24	0.032	11.9781	11.9288	1.16265	Sample_117	AI_export_Plate 2 UNS LN_B6_B06_CD8p_CD8_live.fcs	REq17_Control_21_UNS	Control	REq17	twenty_one	Control_twenty_one	UNS	B06
315	Sample_117	9	25	0.0333333	16.0552	15.5198	1.62545	Sample_117	AI_export_Plate 2 UNS LN_B6_B06_CD8p_CD8_live.fcs	REq17_Control_21_UNS	Control	REq17	twenty_one	Control_twenty_one	UNS	B06
316	Sample_118	1	130	0.173333	22.4958	23.0629	2.15198	Sample_118	AI_export_Plate 2 UNS LN_B7_B07_CD8p_CD8_live.fcs	RVi17_Control_21_UNS	Control	RVi17	twenty_one	Control_twenty_one	UNS	B07
317	Sample_118	10	64	0.0853333	15.5625	16.3071	2.94495	Sample_118	AI_export_Plate 2 UNS LN_B7_B07_CD8p_CD8_live.fcs	RVi17_Control_21_UNS	Control	RVi17	twenty_one	Control_twenty_one	UNS	B07
318	Sample_118	11	47	0.0626667	19.3064	19.5483	1.01827	Sample_118	AI_export_Plate 2 UNS LN_B7_B07_CD8p_CD8_live.fcs	RVi17_Control_21_UNS	Control	RVi17	twenty_one	Control_twenty_one	UNS	B07
319	Sample_118	12	9	0.012	8.66259	8.78138	0.947281	Sample_118	AI_export_Plate 2 UNS LN_B7_B07_CD8p_CD8_live.fcs	RVi17_Control_21_UNS	Control	RVi17	twenty_one	Control_twenty_one	UNS	B07
320	Sample_118	13	23	0.0306667	NA	NA	NA	Sample_118	AI_export_Plate 2 UNS LN_B7_B07_CD8p_CD8_live.fcs	RVi17_Control_21_UNS	Control	RVi17	twenty_one	Control_twenty_one	UNS	B07
321	Sample_118	14	0	0	NA	NA	NA	Sample_118	AI_export_Plate 2 UNS LN_B7_B07_CD8p_CD8_live.fcs	RVi17_Control_21_UNS	Control	RVi17	twenty_one	Control_twenty_one	UNS	B07
322	Sample_118	15	1	0.00133333	NA	NA	NA	Sample_118	AI_export_Plate 2 UNS LN_B7_B07_CD8p_CD8_live.fcs	RVi17_Control_21_UNS	Control	RVi17	twenty_one	Control_twenty_one	UNS	B07
323	Sample_118	2	136	0.181333	4.89649	4.88904	2.03508	Sample_118	AI_export_Plate 2 UNS LN_B7_B07_CD8p_CD8_live.fcs	RVi17_Control_21_UNS	Control	RVi17	twenty_one	Control_twenty_one	UNS	B07
324	Sample_118	3	74	0.0986667	3.4758	3.60916	2.0038	Sample_118	AI_export_Plate 2 UNS LN_B7_B07_CD8p_CD8_live.fcs	RVi17_Control_21_UNS	Control	RVi17	twenty_one	Control_twenty_one	UNS	B07
325	Sample_118	4	54	0.072	NA	NA	NA	Sample_118	AI_export_Plate 2 UNS LN_B7_B07_CD8p_CD8_live.fcs	RVi17_Control_21_UNS	Control	RVi17	twenty_one	Control_twenty_one	UNS	B07
326	Sample_118	5	78	0.104	18.4081	18.5266	1.20321	Sample_118	AI_export_Plate 2 UNS LN_B7_B07_CD8p_CD8_live.fcs	RVi17_Control_21_UNS	Control	RVi17	twenty_one	Control_twenty_one	UNS	B07
327	Sample_118	6	37	0.0493333	NA	NA	NA	Sample_118	AI_export_Plate 2 UNS LN_B7_B07_CD8p_CD8_live.fcs	RVi17_Control_21_UNS	Control	RVi17	twenty_one	Control_twenty_one	UNS	B07
328	Sample_118	7	38	0.0506667	19.2692	19.1416	0.341819	Sample_118	AI_export_Plate 2 UNS LN_B7_B07_CD8p_CD8_live.fcs	RVi17_Control_21_UNS	Control	RVi17	twenty_one	Control_twenty_one	UNS	B07
329	Sample_118	8	40	0.0533333	12.0037	11.9081	2.45721	Sample_118	AI_export_Plate 2 UNS LN_B7_B07_CD8p_CD8_live.fcs	RVi17_Control_21_UNS	Control	RVi17	twenty_one	Control_twenty_one	UNS	B07
330	Sample_118	9	19	0.0253333	16.5331	15.8914	1.46566	Sample_118	AI_export_Plate 2 UNS LN_B7_B07_CD8p_CD8_live.fcs	RVi17_Control_21_UNS	Control	RVi17	twenty_one	Control_twenty_one	UNS	B07
331	Sample_119	1	112	0.149333	21.572	21.58	1.92397	Sample_119	AI_export_Plate 2 UNS LN_B8_B08_CD8p_CD8_live.fcs	RWs17_aIL10+aPD1_21_UNS	aIL10+aPD1	RWs17	twenty_one	aIL10+aPD1_twenty_one	UNS	B08
332	Sample_119	10	28	0.0373333	16.4739	17.3023	2.78682	Sample_119	AI_export_Plate 2 UNS LN_B8_B08_CD8p_CD8_live.fcs	RWs17_aIL10+aPD1_21_UNS	aIL10+aPD1	RWs17	twenty_one	aIL10+aPD1_twenty_one	UNS	B08
333	Sample_119	11	22	0.0293333	18.8948	19.5483	3.49533	Sample_119	AI_export_Plate 2 UNS LN_B8_B08_CD8p_CD8_live.fcs	RWs17_aIL10+aPD1_21_UNS	aIL10+aPD1	RWs17	twenty_one	aIL10+aPD1_twenty_one	UNS	B08
334	Sample_119	12	19	0.0253333	8.9867	8.80719	2.00236	Sample_119	AI_export_Plate 2 UNS LN_B8_B08_CD8p_CD8_live.fcs	RWs17_aIL10+aPD1_21_UNS	aIL10+aPD1	RWs17	twenty_one	aIL10+aPD1_twenty_one	UNS	B08
335	Sample_119	13	8	0.0106667	17.9428	17.9428	NA	Sample_119	AI_export_Plate 2 UNS LN_B8_B08_CD8p_CD8_live.fcs	RWs17_aIL10+aPD1_21_UNS	aIL10+aPD1	RWs17	twenty_one	aIL10+aPD1_twenty_one	UNS	B08
336	Sample_119	14	0	0	NA	NA	NA	Sample_119	AI_export_Plate 2 UNS LN_B8_B08_CD8p_CD8_live.fcs	RWs17_aIL10+aPD1_21_UNS	aIL10+aPD1	RWs17	twenty_one	aIL10+aPD1_twenty_one	UNS	B08
337	Sample_119	15	1	0.00133333	9.34254	9.34254	NA	Sample_119	AI_export_Plate 2 UNS LN_B8_B08_CD8p_CD8_live.fcs	RWs17_aIL10+aPD1_21_UNS	aIL10+aPD1	RWs17	twenty_one	aIL10+aPD1_twenty_one	UNS	B08
338	Sample_119	2	147	0.196	3.96405	3.95535	2.01419	Sample_119	AI_export_Plate 2 UNS LN_B8_B08_CD8p_CD8_live.fcs	RWs17_aIL10+aPD1_21_UNS	aIL10+aPD1	RWs17	twenty_one	aIL10+aPD1_twenty_one	UNS	B08
339	Sample_119	3	150	0.2	3.53832	3.45545	1.60404	Sample_119	AI_export_Plate 2 UNS LN_B8_B08_CD8p_CD8_live.fcs	RWs17_aIL10+aPD1_21_UNS	aIL10+aPD1	RWs17	twenty_one	aIL10+aPD1_twenty_one	UNS	B08
340	Sample_119	4	81	0.108	NA	NA	NA	Sample_119	AI_export_Plate 2 UNS LN_B8_B08_CD8p_CD8_live.fcs	RWs17_aIL10+aPD1_21_UNS	aIL10+aPD1	RWs17	twenty_one	aIL10+aPD1_twenty_one	UNS	B08
341	Sample_119	5	74	0.0986667	19.0095	19.2485	1.21672	Sample_119	AI_export_Plate 2 UNS LN_B8_B08_CD8p_CD8_live.fcs	RWs17_aIL10+aPD1_21_UNS	aIL10+aPD1	RWs17	twenty_one	aIL10+aPD1_twenty_one	UNS	B08
342	Sample_119	6	15	0.02	NA	NA	NA	Sample_119	AI_export_Plate 2 UNS LN_B8_B08_CD8p_CD8_live.fcs	RWs17_aIL10+aPD1_21_UNS	aIL10+aPD1	RWs17	twenty_one	aIL10+aPD1_twenty_one	UNS	B08
343	Sample_119	7	23	0.0306667	19.3097	19.5961	0.609166	Sample_119	AI_export_Plate 2 UNS LN_B8_B08_CD8p_CD8_live.fcs	RWs17_aIL10+aPD1_21_UNS	aIL10+aPD1	RWs17	twenty_one	aIL10+aPD1_twenty_one	UNS	B08
344	Sample_119	8	35	0.0466667	11.8002	11.9272	1.03114	Sample_119	AI_export_Plate 2 UNS LN_B8_B08_CD8p_CD8_live.fcs	RWs17_aIL10+aPD1_21_UNS	aIL10+aPD1	RWs17	twenty_one	aIL10+aPD1_twenty_one	UNS	B08
345	Sample_119	9	35	0.0466667	16.0188	15.8914	1.05235	Sample_119	AI_export_Plate 2 UNS LN_B8_B08_CD8p_CD8_live.fcs	RWs17_aIL10+aPD1_21_UNS	aIL10+aPD1	RWs17	twenty_one	aIL10+aPD1_twenty_one	UNS	B08
346	Sample_12	1	89	0.118667	21.5393	21.2996	2.28206	Sample_12	AI_export_Plate 1 UNS LN_A9_A09_CD8p_CD8_live.fcs	RRh17_aIL10+aPD1_-1_UNS	aIL10+aPD1	RRh17	minus_one	aIL10+aPD1_minus_one	UNS	A09
347	Sample_12	10	23	0.0306667	16.1526	16.7	2.54776	Sample_12	AI_export_Plate 1 UNS LN_A9_A09_CD8p_CD8_live.fcs	RRh17_aIL10+aPD1_-1_UNS	aIL10+aPD1	RRh17	minus_one	aIL10+aPD1_minus_one	UNS	A09
348	Sample_12	11	23	0.0306667	18.198	19.5483	3.17312	Sample_12	AI_export_Plate 1 UNS LN_A9_A09_CD8p_CD8_live.fcs	RRh17_aIL10+aPD1_-1_UNS	aIL10+aPD1	RRh17	minus_one	aIL10+aPD1_minus_one	UNS	A09
349	Sample_12	12	19	0.0253333	9.05302	8.79651	1.64766	Sample_12	AI_export_Plate 1 UNS LN_A9_A09_CD8p_CD8_live.fcs	RRh17_aIL10+aPD1_-1_UNS	aIL10+aPD1	RRh17	minus_one	aIL10+aPD1_minus_one	UNS	A09
350	Sample_12	13	17	0.0226667	NA	NA	NA	Sample_12	AI_export_Plate 1 UNS LN_A9_A09_CD8p_CD8_live.fcs	RRh17_aIL10+aPD1_-1_UNS	aIL10+aPD1	RRh17	minus_one	aIL10+aPD1_minus_one	UNS	A09
351	Sample_12	14	1	0.00133333	0.56396	0.56396	NA	Sample_12	AI_export_Plate 1 UNS LN_A9_A09_CD8p_CD8_live.fcs	RRh17_aIL10+aPD1_-1_UNS	aIL10+aPD1	RRh17	minus_one	aIL10+aPD1_minus_one	UNS	A09
352	Sample_12	15	1	0.00133333	9.34254	9.34254	NA	Sample_12	AI_export_Plate 1 UNS LN_A9_A09_CD8p_CD8_live.fcs	RRh17_aIL10+aPD1_-1_UNS	aIL10+aPD1	RRh17	minus_one	aIL10+aPD1_minus_one	UNS	A09
353	Sample_12	2	168	0.224	5.04951	4.79495	2.31359	Sample_12	AI_export_Plate 1 UNS LN_A9_A09_CD8p_CD8_live.fcs	RRh17_aIL10+aPD1_-1_UNS	aIL10+aPD1	RRh17	minus_one	aIL10+aPD1_minus_one	UNS	A09
354	Sample_12	3	45	0.06	3.93622	3.5689	2.32288	Sample_12	AI_export_Plate 1 UNS LN_A9_A09_CD8p_CD8_live.fcs	RRh17_aIL10+aPD1_-1_UNS	aIL10+aPD1	RRh17	minus_one	aIL10+aPD1_minus_one	UNS	A09
355	Sample_12	4	111	0.148	NA	NA	NA	Sample_12	AI_export_Plate 1 UNS LN_A9_A09_CD8p_CD8_live.fcs	RRh17_aIL10+aPD1_-1_UNS	aIL10+aPD1	RRh17	minus_one	aIL10+aPD1_minus_one	UNS	A09
356	Sample_12	5	91	0.121333	18.6166	18.7902	1.43268	Sample_12	AI_export_Plate 1 UNS LN_A9_A09_CD8p_CD8_live.fcs	RRh17_aIL10+aPD1_-1_UNS	aIL10+aPD1	RRh17	minus_one	aIL10+aPD1_minus_one	UNS	A09
357	Sample_12	6	36	0.048	19.5961	19.5961	NA	Sample_12	AI_export_Plate 1 UNS LN_A9_A09_CD8p_CD8_live.fcs	RRh17_aIL10+aPD1_-1_UNS	aIL10+aPD1	RRh17	minus_one	aIL10+aPD1_minus_one	UNS	A09
358	Sample_12	7	18	0.024	19.5601	19.5961	0.140113	Sample_12	AI_export_Plate 1 UNS LN_A9_A09_CD8p_CD8_live.fcs	RRh17_aIL10+aPD1_-1_UNS	aIL10+aPD1	RRh17	minus_one	aIL10+aPD1_minus_one	UNS	A09
359	Sample_12	8	64	0.0853333	11.6335	11.6875	2.32617	Sample_12	AI_export_Plate 1 UNS LN_A9_A09_CD8p_CD8_live.fcs	RRh17_aIL10+aPD1_-1_UNS	aIL10+aPD1	RRh17	minus_one	aIL10+aPD1_minus_one	UNS	A09
360	Sample_12	9	44	0.0586667	15.7168	15.753	0.864853	Sample_12	AI_export_Plate 1 UNS LN_A9_A09_CD8p_CD8_live.fcs	RRh17_aIL10+aPD1_-1_UNS	aIL10+aPD1	RRh17	minus_one	aIL10+aPD1_minus_one	UNS	A09
361	Sample_120	1	106	0.141333	21.3918	21.7313	3.18884	Sample_120	AI_export_Plate 2 UNS LN_B9_B09_CD8p_CD8_live.fcs	RZp17_aIL10_21_UNS	aIL10	RZp17	twenty_one	aIL10_twenty_one	UNS	B09
362	Sample_120	10	43	0.0573333	15.8076	17.0559	2.72744	Sample_120	AI_export_Plate 2 UNS LN_B9_B09_CD8p_CD8_live.fcs	RZp17_aIL10_21_UNS	aIL10	RZp17	twenty_one	aIL10_twenty_one	UNS	B09
363	Sample_120	11	30	0.04	18.5745	19.5483	3.44182	Sample_120	AI_export_Plate 2 UNS LN_B9_B09_CD8p_CD8_live.fcs	RZp17_aIL10_21_UNS	aIL10	RZp17	twenty_one	aIL10_twenty_one	UNS	B09
364	Sample_120	12	13	0.0173333	8.7977	8.74733	0.741785	Sample_120	AI_export_Plate 2 UNS LN_B9_B09_CD8p_CD8_live.fcs	RZp17_aIL10_21_UNS	aIL10	RZp17	twenty_one	aIL10_twenty_one	UNS	B09
365	Sample_120	13	11	0.0146667	NA	NA	NA	Sample_120	AI_export_Plate 2 UNS LN_B9_B09_CD8p_CD8_live.fcs	RZp17_aIL10_21_UNS	aIL10	RZp17	twenty_one	aIL10_twenty_one	UNS	B09
366	Sample_120	14	0	0	NA	NA	NA	Sample_120	AI_export_Plate 2 UNS LN_B9_B09_CD8p_CD8_live.fcs	RZp17_aIL10_21_UNS	aIL10	RZp17	twenty_one	aIL10_twenty_one	UNS	B09
367	Sample_120	15	2	0.00266667	NA	NA	NA	Sample_120	AI_export_Plate 2 UNS LN_B9_B09_CD8p_CD8_live.fcs	RZp17_aIL10_21_UNS	aIL10	RZp17	twenty_one	aIL10_twenty_one	UNS	B09
368	Sample_120	2	169	0.225333	4.42129	4.66877	2.29958	Sample_120	AI_export_Plate 2 UNS LN_B9_B09_CD8p_CD8_live.fcs	RZp17_aIL10_21_UNS	aIL10	RZp17	twenty_one	aIL10_twenty_one	UNS	B09
369	Sample_120	3	169	0.225333	4.07002	3.66676	2.56641	Sample_120	AI_export_Plate 2 UNS LN_B9_B09_CD8p_CD8_live.fcs	RZp17_aIL10_21_UNS	aIL10	RZp17	twenty_one	aIL10_twenty_one	UNS	B09
370	Sample_120	4	62	0.0826667	10.5715	10.5715	NA	Sample_120	AI_export_Plate 2 UNS LN_B9_B09_CD8p_CD8_live.fcs	RZp17_aIL10_21_UNS	aIL10	RZp17	twenty_one	aIL10_twenty_one	UNS	B09
371	Sample_120	5	67	0.0893333	18.7887	18.8073	0.925156	Sample_120	AI_export_Plate 2 UNS LN_B9_B09_CD8p_CD8_live.fcs	RZp17_aIL10_21_UNS	aIL10	RZp17	twenty_one	aIL10_twenty_one	UNS	B09
372	Sample_120	6	18	0.024	NA	NA	NA	Sample_120	AI_export_Plate 2 UNS LN_B9_B09_CD8p_CD8_live.fcs	RZp17_aIL10_21_UNS	aIL10	RZp17	twenty_one	aIL10_twenty_one	UNS	B09
373	Sample_120	7	6	0.008	19.5832	19.5961	0.0210771	Sample_120	AI_export_Plate 2 UNS LN_B9_B09_CD8p_CD8_live.fcs	RZp17_aIL10_21_UNS	aIL10	RZp17	twenty_one	aIL10_twenty_one	UNS	B09
374	Sample_120	8	27	0.036	11.5948	11.7595	3.25002	Sample_120	AI_export_Plate 2 UNS LN_B9_B09_CD8p_CD8_live.fcs	RZp17_aIL10_21_UNS	aIL10	RZp17	twenty_one	aIL10_twenty_one	UNS	B09
375	Sample_120	9	27	0.036	15.5483	15.8914	0.969855	Sample_120	AI_export_Plate 2 UNS LN_B9_B09_CD8p_CD8_live.fcs	RZp17_aIL10_21_UNS	aIL10	RZp17	twenty_one	aIL10_twenty_one	UNS	B09
376	Sample_121	1	97	0.129333	21.958	22.7104	2.71631	Sample_121	AI_export_Plate 2 UNS LN_C1_C01_CD8p_CD8_live.fcs	REu17_Control_36_UNS	Control	REu17	thirty_six	Control_thirty_six	UNS	C01
377	Sample_121	10	19	0.0253333	14.4071	15.6421	2.93347	Sample_121	AI_export_Plate 2 UNS LN_C1_C01_CD8p_CD8_live.fcs	REu17_Control_36_UNS	Control	REu17	thirty_six	Control_thirty_six	UNS	C01
378	Sample_121	11	9	0.012	17.1795	19.5483	6.71933	Sample_121	AI_export_Plate 2 UNS LN_C1_C01_CD8p_CD8_live.fcs	REu17_Control_36_UNS	Control	REu17	thirty_six	Control_thirty_six	UNS	C01
379	Sample_121	12	12	0.016	8.53373	8.37655	0.666815	Sample_121	AI_export_Plate 2 UNS LN_C1_C01_CD8p_CD8_live.fcs	REu17_Control_36_UNS	Control	REu17	thirty_six	Control_thirty_six	UNS	C01
380	Sample_121	13	7	0.00933333	NA	NA	NA	Sample_121	AI_export_Plate 2 UNS LN_C1_C01_CD8p_CD8_live.fcs	REu17_Control_36_UNS	Control	REu17	thirty_six	Control_thirty_six	UNS	C01
381	Sample_121	14	0	0	NA	NA	NA	Sample_121	AI_export_Plate 2 UNS LN_C1_C01_CD8p_CD8_live.fcs	REu17_Control_36_UNS	Control	REu17	thirty_six	Control_thirty_six	UNS	C01
382	Sample_121	15	2	0.00266667	16.9043	16.9043	11.1143	Sample_121	AI_export_Plate 2 UNS LN_C1_C01_CD8p_CD8_live.fcs	REu17_Control_36_UNS	Control	REu17	thirty_six	Control_thirty_six	UNS	C01
383	Sample_121	2	193	0.257333	4.30901	4.61229	2.25201	Sample_121	AI_export_Plate 2 UNS LN_C1_C01_CD8p_CD8_live.fcs	REu17_Control_36_UNS	Control	REu17	thirty_six	Control_thirty_six	UNS	C01
384	Sample_121	3	167	0.222667	4.11785	3.66676	3.74141	Sample_121	AI_export_Plate 2 UNS LN_C1_C01_CD8p_CD8_live.fcs	REu17_Control_36_UNS	Control	REu17	thirty_six	Control_thirty_six	UNS	C01
385	Sample_121	4	69	0.092	NA	NA	NA	Sample_121	AI_export_Plate 2 UNS LN_C1_C01_CD8p_CD8_live.fcs	REu17_Control_36_UNS	Control	REu17	thirty_six	Control_thirty_six	UNS	C01
386	Sample_121	5	70	0.0933333	18.4987	18.8045	2.51455	Sample_121	AI_export_Plate 2 UNS LN_C1_C01_CD8p_CD8_live.fcs	REu17_Control_36_UNS	Control	REu17	thirty_six	Control_thirty_six	UNS	C01
387	Sample_121	6	22	0.0293333	NA	NA	NA	Sample_121	AI_export_Plate 2 UNS LN_C1_C01_CD8p_CD8_live.fcs	REu17_Control_36_UNS	Control	REu17	thirty_six	Control_thirty_six	UNS	C01
388	Sample_121	7	17	0.0226667	19.4078	19.5961	0.323262	Sample_121	AI_export_Plate 2 UNS LN_C1_C01_CD8p_CD8_live.fcs	REu17_Control_36_UNS	Control	REu17	thirty_six	Control_thirty_six	UNS	C01
389	Sample_121	8	51	0.068	11.6842	11.7791	0.904775	Sample_121	AI_export_Plate 2 UNS LN_C1_C01_CD8p_CD8_live.fcs	REu17_Control_36_UNS	Control	REu17	thirty_six	Control_thirty_six	UNS	C01
390	Sample_121	9	15	0.02	16.421	15.8914	1.41669	Sample_121	AI_export_Plate 2 UNS LN_C1_C01_CD8p_CD8_live.fcs	REu17_Control_36_UNS	Control	REu17	thirty_six	Control_thirty_six	UNS	C01
391	Sample_122	1	162	0.216	21.8432	22.0338	2.35313	Sample_122	AI_export_Plate 2 UNS LN_C10_C10_CD8p_CD8_live.fcs	RZp17_aIL10_36_UNS	aIL10	RZp17	thirty_six	aIL10_thirty_six	UNS	C10
392	Sample_122	10	21	0.028	16.7976	17.0566	1.83239	Sample_122	AI_export_Plate 2 UNS LN_C10_C10_CD8p_CD8_live.fcs	RZp17_aIL10_36_UNS	aIL10	RZp17	thirty_six	aIL10_thirty_six	UNS	C10
393	Sample_122	11	39	0.052	17.4562	19.5483	5.12874	Sample_122	AI_export_Plate 2 UNS LN_C10_C10_CD8p_CD8_live.fcs	RZp17_aIL10_36_UNS	aIL10	RZp17	thirty_six	aIL10_thirty_six	UNS	C10
394	Sample_122	12	6	0.008	8.41863	8.3644	0.43828	Sample_122	AI_export_Plate 2 UNS LN_C10_C10_CD8p_CD8_live.fcs	RZp17_aIL10_36_UNS	aIL10	RZp17	thirty_six	aIL10_thirty_six	UNS	C10
395	Sample_122	13	7	0.00933333	NA	NA	NA	Sample_122	AI_export_Plate 2 UNS LN_C10_C10_CD8p_CD8_live.fcs	RZp17_aIL10_36_UNS	aIL10	RZp17	thirty_six	aIL10_thirty_six	UNS	C10
396	Sample_122	14	3	0.004	0.56396	0.56396	NA	Sample_122	AI_export_Plate 2 UNS LN_C10_C10_CD8p_CD8_live.fcs	RZp17_aIL10_36_UNS	aIL10	RZp17	thirty_six	aIL10_thirty_six	UNS	C10
397	Sample_122	15	2	0.00266667	9.04525	9.04525	NA	Sample_122	AI_export_Plate 2 UNS LN_C10_C10_CD8p_CD8_live.fcs	RZp17_aIL10_36_UNS	aIL10	RZp17	thirty_six	aIL10_thirty_six	UNS	C10
398	Sample_122	2	103	0.137333	4.82969	4.82158	2.08363	Sample_122	AI_export_Plate 2 UNS LN_C10_C10_CD8p_CD8_live.fcs	RZp17_aIL10_36_UNS	aIL10	RZp17	thirty_six	aIL10_thirty_six	UNS	C10
399	Sample_122	3	166	0.221333	3.8243	3.58896	2.73215	Sample_122	AI_export_Plate 2 UNS LN_C10_C10_CD8p_CD8_live.fcs	RZp17_aIL10_36_UNS	aIL10	RZp17	thirty_six	aIL10_thirty_six	UNS	C10
400	Sample_122	4	78	0.104	16.7027	16.7027	NA	Sample_122	AI_export_Plate 2 UNS LN_C10_C10_CD8p_CD8_live.fcs	RZp17_aIL10_36_UNS	aIL10	RZp17	thirty_six	aIL10_thirty_six	UNS	C10
401	Sample_122	5	62	0.0826667	18.7078	18.9563	1.8074	Sample_122	AI_export_Plate 2 UNS LN_C10_C10_CD8p_CD8_live.fcs	RZp17_aIL10_36_UNS	aIL10	RZp17	thirty_six	aIL10_thirty_six	UNS	C10
402	Sample_122	6	30	0.04	19.1091	19.1091	NA	Sample_122	AI_export_Plate 2 UNS LN_C10_C10_CD8p_CD8_live.fcs	RZp17_aIL10_36_UNS	aIL10	RZp17	thirty_six	aIL10_thirty_six	UNS	C10
403	Sample_122	7	19	0.0253333	19.4672	19.578	0.199807	Sample_122	AI_export_Plate 2 UNS LN_C10_C10_CD8p_CD8_live.fcs	RZp17_aIL10_36_UNS	aIL10	RZp17	thirty_six	aIL10_thirty_six	UNS	C10
404	Sample_122	8	21	0.028	11.5597	11.7791	1.69048	Sample_122	AI_export_Plate 2 UNS LN_C10_C10_CD8p_CD8_live.fcs	RZp17_aIL10_36_UNS	aIL10	RZp17	thirty_six	aIL10_thirty_six	UNS	C10
405	Sample_122	9	31	0.0413333	16.4166	15.8914	2.05962	Sample_122	AI_export_Plate 2 UNS LN_C10_C10_CD8p_CD8_live.fcs	RZp17_aIL10_36_UNS	aIL10	RZp17	thirty_six	aIL10_thirty_six	UNS	C10
406	Sample_123	1	162	0.216	22.072	22.4267	3.04976	Sample_123	AI_export_Plate 2 UNS LN_C3_C03_CD8p_CD8_live.fcs	RVc17_aIL10_36_UNS	aIL10	RVc17	thirty_six	aIL10_thirty_six	UNS	C03
407	Sample_123	10	13	0.0173333	14.9464	15.3116	2.01628	Sample_123	AI_export_Plate 2 UNS LN_C3_C03_CD8p_CD8_live.fcs	RVc17_aIL10_36_UNS	aIL10	RVc17	thirty_six	aIL10_thirty_six	UNS	C03
408	Sample_123	11	13	0.0173333	19.2301	19.5483	0.805396	Sample_123	AI_export_Plate 2 UNS LN_C3_C03_CD8p_CD8_live.fcs	RVc17_aIL10_36_UNS	aIL10	RVc17	thirty_six	aIL10_thirty_six	UNS	C03
409	Sample_123	12	3	0.004	10.4573	10.4162	2.27971	Sample_123	AI_export_Plate 2 UNS LN_C3_C03_CD8p_CD8_live.fcs	RVc17_aIL10_36_UNS	aIL10	RVc17	thirty_six	aIL10_thirty_six	UNS	C03
410	Sample_123	13	4	0.00533333	NA	NA	NA	Sample_123	AI_export_Plate 2 UNS LN_C3_C03_CD8p_CD8_live.fcs	RVc17_aIL10_36_UNS	aIL10	RVc17	thirty_six	aIL10_thirty_six	UNS	C03
411	Sample_123	14	2	0.00266667	0.384007	0.384007	0.543068	Sample_123	AI_export_Plate 2 UNS LN_C3_C03_CD8p_CD8_live.fcs	RVc17_aIL10_36_UNS	aIL10	RVc17	thirty_six	aIL10_thirty_six	UNS	C03
412	Sample_123	15	0	0	NA	NA	NA	Sample_123	AI_export_Plate 2 UNS LN_C3_C03_CD8p_CD8_live.fcs	RVc17_aIL10_36_UNS	aIL10	RVc17	thirty_six	aIL10_thirty_six	UNS	C03
413	Sample_123	2	92	0.122667	4.38052	4.69589	1.81653	Sample_123	AI_export_Plate 2 UNS LN_C3_C03_CD8p_CD8_live.fcs	RVc17_aIL10_36_UNS	aIL10	RVc17	thirty_six	aIL10_thirty_six	UNS	C03
414	Sample_123	3	136	0.181333	3.88275	3.66676	2.03854	Sample_123	AI_export_Plate 2 UNS LN_C3_C03_CD8p_CD8_live.fcs	RVc17_aIL10_36_UNS	aIL10	RVc17	thirty_six	aIL10_thirty_six	UNS	C03
415	Sample_123	4	180	0.24	2.94997	2.94997	NA	Sample_123	AI_export_Plate 2 UNS LN_C3_C03_CD8p_CD8_live.fcs	RVc17_aIL10_36_UNS	aIL10	RVc17	thirty_six	aIL10_thirty_six	UNS	C03
416	Sample_123	5	60	0.08	19.1914	19.2318	1.06976	Sample_123	AI_export_Plate 2 UNS LN_C3_C03_CD8p_CD8_live.fcs	RVc17_aIL10_36_UNS	aIL10	RVc17	thirty_six	aIL10_thirty_six	UNS	C03
417	Sample_123	6	27	0.036	19.7299	19.7299	NA	Sample_123	AI_export_Plate 2 UNS LN_C3_C03_CD8p_CD8_live.fcs	RVc17_aIL10_36_UNS	aIL10	RVc17	thirty_six	aIL10_thirty_six	UNS	C03
418	Sample_123	7	8	0.0106667	18.6606	19.3056	1.28071	Sample_123	AI_export_Plate 2 UNS LN_C3_C03_CD8p_CD8_live.fcs	RVc17_aIL10_36_UNS	aIL10	RVc17	thirty_six	aIL10_thirty_six	UNS	C03
419	Sample_123	8	21	0.028	11.7642	11.8332	1.41124	Sample_123	AI_export_Plate 2 UNS LN_C3_C03_CD8p_CD8_live.fcs	RVc17_aIL10_36_UNS	aIL10	RVc17	thirty_six	aIL10_thirty_six	UNS	C03
420	Sample_123	9	29	0.0386667	16.1163	15.8914	2.19855	Sample_123	AI_export_Plate 2 UNS LN_C3_C03_CD8p_CD8_live.fcs	RVc17_aIL10_36_UNS	aIL10	RVc17	thirty_six	aIL10_thirty_six	UNS	C03
421	Sample_124	1	263	0.350667	22.2794	23.0174	2.38688	Sample_124	AI_export_Plate 2 UNS LN_C4_C04_CD8p_CD8_live.fcs	RZg17_Control_36_UNS	Control	RZg17	thirty_six	Control_thirty_six	UNS	C04
422	Sample_124	10	30	0.04	15.9901	15.6549	1.22458	Sample_124	AI_export_Plate 2 UNS LN_C4_C04_CD8p_CD8_live.fcs	RZg17_Control_36_UNS	Control	RZg17	thirty_six	Control_thirty_six	UNS	C04
423	Sample_124	11	21	0.028	19.2845	19.5483	0.807706	Sample_124	AI_export_Plate 2 UNS LN_C4_C04_CD8p_CD8_live.fcs	RZg17_Control_36_UNS	Control	RZg17	thirty_six	Control_thirty_six	UNS	C04
424	Sample_124	12	6	0.008	7.87631	8.55314	2.46426	Sample_124	AI_export_Plate 2 UNS LN_C4_C04_CD8p_CD8_live.fcs	RZg17_Control_36_UNS	Control	RZg17	thirty_six	Control_thirty_six	UNS	C04
425	Sample_124	13	10	0.0133333	NA	NA	NA	Sample_124	AI_export_Plate 2 UNS LN_C4_C04_CD8p_CD8_live.fcs	RZg17_Control_36_UNS	Control	RZg17	thirty_six	Control_thirty_six	UNS	C04
426	Sample_124	14	0	0	NA	NA	NA	Sample_124	AI_export_Plate 2 UNS LN_C4_C04_CD8p_CD8_live.fcs	RZg17_Control_36_UNS	Control	RZg17	thirty_six	Control_thirty_six	UNS	C04
427	Sample_124	15	3	0.004	14.2846	9.04525	9.07483	Sample_124	AI_export_Plate 2 UNS LN_C4_C04_CD8p_CD8_live.fcs	RZg17_Control_36_UNS	Control	RZg17	thirty_six	Control_thirty_six	UNS	C04
428	Sample_124	2	85	0.113333	4.74052	4.52145	2.73233	Sample_124	AI_export_Plate 2 UNS LN_C4_C04_CD8p_CD8_live.fcs	RZg17_Control_36_UNS	Control	RZg17	thirty_six	Control_thirty_six	UNS	C04
429	Sample_124	3	55	0.0733333	4.37076	3.66676	3.36899	Sample_124	AI_export_Plate 2 UNS LN_C4_C04_CD8p_CD8_live.fcs	RZg17_Control_36_UNS	Control	RZg17	thirty_six	Control_thirty_six	UNS	C04
430	Sample_124	4	52	0.0693333	3.66676	3.66676	NA	Sample_124	AI_export_Plate 2 UNS LN_C4_C04_CD8p_CD8_live.fcs	RZg17_Control_36_UNS	Control	RZg17	thirty_six	Control_thirty_six	UNS	C04
431	Sample_124	5	110	0.146667	18.6806	18.8724	1.11382	Sample_124	AI_export_Plate 2 UNS LN_C4_C04_CD8p_CD8_live.fcs	RZg17_Control_36_UNS	Control	RZg17	thirty_six	Control_thirty_six	UNS	C04
432	Sample_124	6	11	0.0146667	NA	NA	NA	Sample_124	AI_export_Plate 2 UNS LN_C4_C04_CD8p_CD8_live.fcs	RZg17_Control_36_UNS	Control	RZg17	thirty_six	Control_thirty_six	UNS	C04
433	Sample_124	7	17	0.0226667	19.2806	19.5961	0.934331	Sample_124	AI_export_Plate 2 UNS LN_C4_C04_CD8p_CD8_live.fcs	RZg17_Control_36_UNS	Control	RZg17	thirty_six	Control_thirty_six	UNS	C04
434	Sample_124	8	30	0.04	11.6249	11.9589	1.30989	Sample_124	AI_export_Plate 2 UNS LN_C4_C04_CD8p_CD8_live.fcs	RZg17_Control_36_UNS	Control	RZg17	thirty_six	Control_thirty_six	UNS	C04
435	Sample_124	9	57	0.076	15.8139	15.8914	1.17143	Sample_124	AI_export_Plate 2 UNS LN_C4_C04_CD8p_CD8_live.fcs	RZg17_Control_36_UNS	Control	RZg17	thirty_six	Control_thirty_six	UNS	C04
436	Sample_125	1	60	0.08	20.9241	21.6058	3.62855	Sample_125	AI_export_Plate 2 UNS LN_C5_C05_CD8p_CD8_live.fcs	34920_aIL10_36_UNS	aIL10	34920	thirty_six	aIL10_thirty_six	UNS	C05
437	Sample_125	10	51	0.068	15.8918	16.1718	1.898	Sample_125	AI_export_Plate 2 UNS LN_C5_C05_CD8p_CD8_live.fcs	34920_aIL10_36_UNS	aIL10	34920	thirty_six	aIL10_thirty_six	UNS	C05
438	Sample_125	11	18	0.024	18.1538	19.5483	3.74756	Sample_125	AI_export_Plate 2 UNS LN_C5_C05_CD8p_CD8_live.fcs	34920_aIL10_36_UNS	aIL10	34920	thirty_six	aIL10_thirty_six	UNS	C05
439	Sample_125	12	6	0.008	9.62675	8.14598	3.68477	Sample_125	AI_export_Plate 2 UNS LN_C5_C05_CD8p_CD8_live.fcs	34920_aIL10_36_UNS	aIL10	34920	thirty_six	aIL10_thirty_six	UNS	C05
440	Sample_125	13	37	0.0493333	NA	NA	NA	Sample_125	AI_export_Plate 2 UNS LN_C5_C05_CD8p_CD8_live.fcs	34920_aIL10_36_UNS	aIL10	34920	thirty_six	aIL10_thirty_six	UNS	C05
441	Sample_125	14	0	0	NA	NA	NA	Sample_125	AI_export_Plate 2 UNS LN_C5_C05_CD8p_CD8_live.fcs	34920_aIL10_36_UNS	aIL10	34920	thirty_six	aIL10_thirty_six	UNS	C05
442	Sample_125	15	3	0.004	NA	NA	NA	Sample_125	AI_export_Plate 2 UNS LN_C5_C05_CD8p_CD8_live.fcs	34920_aIL10_36_UNS	aIL10	34920	thirty_six	aIL10_thirty_six	UNS	C05
443	Sample_125	2	46	0.0613333	4.36052	4.07939	2.10883	Sample_125	AI_export_Plate 2 UNS LN_C5_C05_CD8p_CD8_live.fcs	34920_aIL10_36_UNS	aIL10	34920	thirty_six	aIL10_thirty_six	UNS	C05
444	Sample_125	3	86	0.114667	4.53208	3.74273	4.04885	Sample_125	AI_export_Plate 2 UNS LN_C5_C05_CD8p_CD8_live.fcs	34920_aIL10_36_UNS	aIL10	34920	thirty_six	aIL10_thirty_six	UNS	C05
445	Sample_125	4	264	0.352	20.1241	20.1241	0.814359	Sample_125	AI_export_Plate 2 UNS LN_C5_C05_CD8p_CD8_live.fcs	34920_aIL10_36_UNS	aIL10	34920	thirty_six	aIL10_thirty_six	UNS	C05
446	Sample_125	5	14	0.0186667	19.241	19.497	1.08873	Sample_125	AI_export_Plate 2 UNS LN_C5_C05_CD8p_CD8_live.fcs	34920_aIL10_36_UNS	aIL10	34920	thirty_six	aIL10_thirty_six	UNS	C05
447	Sample_125	6	104	0.138667	NA	NA	NA	Sample_125	AI_export_Plate 2 UNS LN_C5_C05_CD8p_CD8_live.fcs	34920_aIL10_36_UNS	aIL10	34920	thirty_six	aIL10_thirty_six	UNS	C05
448	Sample_125	7	25	0.0333333	19.2094	19.1091	0.28303	Sample_125	AI_export_Plate 2 UNS LN_C5_C05_CD8p_CD8_live.fcs	34920_aIL10_36_UNS	aIL10	34920	thirty_six	aIL10_thirty_six	UNS	C05
449	Sample_125	8	17	0.0226667	11.8159	11.7424	0.90608	Sample_125	AI_export_Plate 2 UNS LN_C5_C05_CD8p_CD8_live.fcs	34920_aIL10_36_UNS	aIL10	34920	thirty_six	aIL10_thirty_six	UNS	C05
450	Sample_125	9	19	0.0253333	15.9237	15.8914	0.784278	Sample_125	AI_export_Plate 2 UNS LN_C5_C05_CD8p_CD8_live.fcs	34920_aIL10_36_UNS	aIL10	34920	thirty_six	aIL10_thirty_six	UNS	C05
451	Sample_126	1	67	0.0893333	21.2124	22.1681	3.9644	Sample_126	AI_export_Plate 2 UNS LN_C6_C06_CD8p_CD8_live.fcs	34930_aIL10_36_UNS	aIL10	34930	thirty_six	aIL10_thirty_six	UNS	C06
452	Sample_126	10	98	0.130667	15.9949	15.8857	1.36702	Sample_126	AI_export_Plate 2 UNS LN_C6_C06_CD8p_CD8_live.fcs	34930_aIL10_36_UNS	aIL10	34930	thirty_six	aIL10_thirty_six	UNS	C06
453	Sample_126	11	26	0.0346667	18.6035	19.5483	2.57392	Sample_126	AI_export_Plate 2 UNS LN_C6_C06_CD8p_CD8_live.fcs	34930_aIL10_36_UNS	aIL10	34930	thirty_six	aIL10_thirty_six	UNS	C06
454	Sample_126	12	6	0.008	9.87494	9.3411	2.0906	Sample_126	AI_export_Plate 2 UNS LN_C6_C06_CD8p_CD8_live.fcs	34930_aIL10_36_UNS	aIL10	34930	thirty_six	aIL10_thirty_six	UNS	C06
455	Sample_126	13	13	0.0173333	NA	NA	NA	Sample_126	AI_export_Plate 2 UNS LN_C6_C06_CD8p_CD8_live.fcs	34930_aIL10_36_UNS	aIL10	34930	thirty_six	aIL10_thirty_six	UNS	C06
456	Sample_126	14	0	0	NA	NA	NA	Sample_126	AI_export_Plate 2 UNS LN_C6_C06_CD8p_CD8_live.fcs	34930_aIL10_36_UNS	aIL10	34930	thirty_six	aIL10_thirty_six	UNS	C06
457	Sample_126	15	2	0.00266667	9.04525	9.04525	NA	Sample_126	AI_export_Plate 2 UNS LN_C6_C06_CD8p_CD8_live.fcs	34930_aIL10_36_UNS	aIL10	34930	thirty_six	aIL10_thirty_six	UNS	C06
458	Sample_126	2	76	0.101333	4.14795	4.05871	2.23189	Sample_126	AI_export_Plate 2 UNS LN_C6_C06_CD8p_CD8_live.fcs	34930_aIL10_36_UNS	aIL10	34930	thirty_six	aIL10_thirty_six	UNS	C06
459	Sample_126	3	120	0.16	3.98866	3.66676	2.09804	Sample_126	AI_export_Plate 2 UNS LN_C6_C06_CD8p_CD8_live.fcs	34930_aIL10_36_UNS	aIL10	34930	thirty_six	aIL10_thirty_six	UNS	C06
460	Sample_126	4	130	0.173333	NA	NA	NA	Sample_126	AI_export_Plate 2 UNS LN_C6_C06_CD8p_CD8_live.fcs	34930_aIL10_36_UNS	aIL10	34930	thirty_six	aIL10_thirty_six	UNS	C06
461	Sample_126	5	48	0.064	18.5274	18.7156	1.00788	Sample_126	AI_export_Plate 2 UNS LN_C6_C06_CD8p_CD8_live.fcs	34930_aIL10_36_UNS	aIL10	34930	thirty_six	aIL10_thirty_six	UNS	C06
462	Sample_126	6	65	0.0866667	19.3526	19.3526	0.344346	Sample_126	AI_export_Plate 2 UNS LN_C6_C06_CD8p_CD8_live.fcs	34930_aIL10_36_UNS	aIL10	34930	thirty_six	aIL10_thirty_six	UNS	C06
463	Sample_126	7	34	0.0453333	19.2153	19.1091	0.295588	Sample_126	AI_export_Plate 2 UNS LN_C6_C06_CD8p_CD8_live.fcs	34930_aIL10_36_UNS	aIL10	34930	thirty_six	aIL10_thirty_six	UNS	C06
464	Sample_126	8	19	0.0253333	12.3408	12.2263	1.867	Sample_126	AI_export_Plate 2 UNS LN_C6_C06_CD8p_CD8_live.fcs	34930_aIL10_36_UNS	aIL10	34930	thirty_six	aIL10_thirty_six	UNS	C06
465	Sample_126	9	46	0.0613333	15.7165	15.8914	0.890658	Sample_126	AI_export_Plate 2 UNS LN_C6_C06_CD8p_CD8_live.fcs	34930_aIL10_36_UNS	aIL10	34930	thirty_six	aIL10_thirty_six	UNS	C06
466	Sample_127	1	115	0.153333	21.2831	21.7158	2.86686	Sample_127	AI_export_Plate 2 UNS LN_C7_C07_CD8p_CD8_live.fcs	REq17_Control_36_UNS	Control	REq17	thirty_six	Control_thirty_six	UNS	C07
467	Sample_127	10	47	0.0626667	16.3329	16.6756	1.61587	Sample_127	AI_export_Plate 2 UNS LN_C7_C07_CD8p_CD8_live.fcs	REq17_Control_36_UNS	Control	REq17	thirty_six	Control_thirty_six	UNS	C07
468	Sample_127	11	14	0.0186667	19.5162	19.5483	0.0947825	Sample_127	AI_export_Plate 2 UNS LN_C7_C07_CD8p_CD8_live.fcs	REq17_Control_36_UNS	Control	REq17	thirty_six	Control_thirty_six	UNS	C07
469	Sample_127	12	8	0.0106667	12.298	11.0046	5.60466	Sample_127	AI_export_Plate 2 UNS LN_C7_C07_CD8p_CD8_live.fcs	REq17_Control_36_UNS	Control	REq17	thirty_six	Control_thirty_six	UNS	C07
470	Sample_127	13	5	0.00666667	NA	NA	NA	Sample_127	AI_export_Plate 2 UNS LN_C7_C07_CD8p_CD8_live.fcs	REq17_Control_36_UNS	Control	REq17	thirty_six	Control_thirty_six	UNS	C07
471	Sample_127	14	0	0	NA	NA	NA	Sample_127	AI_export_Plate 2 UNS LN_C7_C07_CD8p_CD8_live.fcs	REq17_Control_36_UNS	Control	REq17	thirty_six	Control_thirty_six	UNS	C07
472	Sample_127	15	3	0.004	24.7633	24.7633	NA	Sample_127	AI_export_Plate 2 UNS LN_C7_C07_CD8p_CD8_live.fcs	REq17_Control_36_UNS	Control	REq17	thirty_six	Control_thirty_six	UNS	C07
473	Sample_127	2	133	0.177333	4.5399	4.71621	2.30333	Sample_127	AI_export_Plate 2 UNS LN_C7_C07_CD8p_CD8_live.fcs	REq17_Control_36_UNS	Control	REq17	thirty_six	Control_thirty_six	UNS	C07
474	Sample_127	3	157	0.209333	3.90919	3.63073	2.70431	Sample_127	AI_export_Plate 2 UNS LN_C7_C07_CD8p_CD8_live.fcs	REq17_Control_36_UNS	Control	REq17	thirty_six	Control_thirty_six	UNS	C07
475	Sample_127	4	76	0.101333	NA	NA	NA	Sample_127	AI_export_Plate 2 UNS LN_C7_C07_CD8p_CD8_live.fcs	REq17_Control_36_UNS	Control	REq17	thirty_six	Control_thirty_six	UNS	C07
476	Sample_127	5	51	0.068	18.5866	18.9088	1.99464	Sample_127	AI_export_Plate 2 UNS LN_C7_C07_CD8p_CD8_live.fcs	REq17_Control_36_UNS	Control	REq17	thirty_six	Control_thirty_six	UNS	C07
477	Sample_127	6	16	0.0213333	NA	NA	NA	Sample_127	AI_export_Plate 2 UNS LN_C7_C07_CD8p_CD8_live.fcs	REq17_Control_36_UNS	Control	REq17	thirty_six	Control_thirty_six	UNS	C07
478	Sample_127	7	31	0.0413333	19.2989	19.5373	0.531968	Sample_127	AI_export_Plate 2 UNS LN_C7_C07_CD8p_CD8_live.fcs	REq17_Control_36_UNS	Control	REq17	thirty_six	Control_thirty_six	UNS	C07
479	Sample_127	8	26	0.0346667	12.9435	12.2455	3.09236	Sample_127	AI_export_Plate 2 UNS LN_C7_C07_CD8p_CD8_live.fcs	REq17_Control_36_UNS	Control	REq17	thirty_six	Control_thirty_six	UNS	C07
480	Sample_127	9	68	0.0906667	16.1093	15.8914	1.65706	Sample_127	AI_export_Plate 2 UNS LN_C7_C07_CD8p_CD8_live.fcs	REq17_Control_36_UNS	Control	REq17	thirty_six	Control_thirty_six	UNS	C07
481	Sample_128	1	174	0.232	22.0152	22.6479	2.38999	Sample_128	AI_export_Plate 2 UNS LN_C8_C08_CD8p_CD8_live.fcs	RVi17_Control_36_UNS	Control	RVi17	thirty_six	Control_thirty_six	UNS	C08
482	Sample_128	10	78	0.104	16.0332	16.3036	1.95289	Sample_128	AI_export_Plate 2 UNS LN_C8_C08_CD8p_CD8_live.fcs	RVi17_Control_36_UNS	Control	RVi17	thirty_six	Control_thirty_six	UNS	C08
483	Sample_128	11	51	0.068	18.7541	19.5483	2.82754	Sample_128	AI_export_Plate 2 UNS LN_C8_C08_CD8p_CD8_live.fcs	RVi17_Control_36_UNS	Control	RVi17	thirty_six	Control_thirty_six	UNS	C08
484	Sample_128	12	2	0.00266667	6.34816	6.34816	2.41329	Sample_128	AI_export_Plate 2 UNS LN_C8_C08_CD8p_CD8_live.fcs	RVi17_Control_36_UNS	Control	RVi17	thirty_six	Control_thirty_six	UNS	C08
485	Sample_128	13	6	0.008	18.1313	18.1313	NA	Sample_128	AI_export_Plate 2 UNS LN_C8_C08_CD8p_CD8_live.fcs	RVi17_Control_36_UNS	Control	RVi17	thirty_six	Control_thirty_six	UNS	C08
486	Sample_128	14	3	0.004	19.5483	19.5483	NA	Sample_128	AI_export_Plate 2 UNS LN_C8_C08_CD8p_CD8_live.fcs	RVi17_Control_36_UNS	Control	RVi17	thirty_six	Control_thirty_six	UNS	C08
487	Sample_128	15	1	0.00133333	19.5483	19.5483	NA	Sample_128	AI_export_Plate 2 UNS LN_C8_C08_CD8p_CD8_live.fcs	RVi17_Control_36_UNS	Control	RVi17	thirty_six	Control_thirty_six	UNS	C08
488	Sample_128	2	103	0.137333	4.81892	4.71621	2.46218	Sample_128	AI_export_Plate 2 UNS LN_C8_C08_CD8p_CD8_live.fcs	RVi17_Control_36_UNS	Control	RVi17	thirty_six	Control_thirty_six	UNS	C08
489	Sample_128	3	96	0.128	4.09558	3.56287	2.81175	Sample_128	AI_export_Plate 2 UNS LN_C8_C08_CD8p_CD8_live.fcs	RVi17_Control_36_UNS	Control	RVi17	thirty_six	Control_thirty_six	UNS	C08
490	Sample_128	4	50	0.0666667	20.6843	20.6843	5.0301	Sample_128	AI_export_Plate 2 UNS LN_C8_C08_CD8p_CD8_live.fcs	RVi17_Control_36_UNS	Control	RVi17	thirty_six	Control_thirty_six	UNS	C08
491	Sample_128	5	71	0.0946667	18.5841	18.8724	2.11151	Sample_128	AI_export_Plate 2 UNS LN_C8_C08_CD8p_CD8_live.fcs	RVi17_Control_36_UNS	Control	RVi17	thirty_six	Control_thirty_six	UNS	C08
492	Sample_128	6	34	0.0453333	18.9497	19.1091	0.276031	Sample_128	AI_export_Plate 2 UNS LN_C8_C08_CD8p_CD8_live.fcs	RVi17_Control_36_UNS	Control	RVi17	thirty_six	Control_thirty_six	UNS	C08
493	Sample_128	7	32	0.0426667	19.0899	19.1091	0.316123	Sample_128	AI_export_Plate 2 UNS LN_C8_C08_CD8p_CD8_live.fcs	RVi17_Control_36_UNS	Control	RVi17	thirty_six	Control_thirty_six	UNS	C08
494	Sample_128	8	15	0.02	11.8642	11.9767	0.684444	Sample_128	AI_export_Plate 2 UNS LN_C8_C08_CD8p_CD8_live.fcs	RVi17_Control_36_UNS	Control	RVi17	thirty_six	Control_thirty_six	UNS	C08
495	Sample_128	9	34	0.0453333	16.0768	15.8914	1.22357	Sample_128	AI_export_Plate 2 UNS LN_C8_C08_CD8p_CD8_live.fcs	RVi17_Control_36_UNS	Control	RVi17	thirty_six	Control_thirty_six	UNS	C08
496	Sample_129	1	115	0.153333	21.6849	21.8469	2.38703	Sample_129	AI_export_Plate 2 UNS LN_C9_C09_CD8p_CD8_live.fcs	RWs17_aIL10+aPD1_36_UNS	aIL10+aPD1	RWs17	thirty_six	aIL10+aPD1_thirty_six	UNS	C09
497	Sample_129	10	33	0.044	16.2656	16.0108	1.35411	Sample_129	AI_export_Plate 2 UNS LN_C9_C09_CD8p_CD8_live.fcs	RWs17_aIL10+aPD1_36_UNS	aIL10+aPD1	RWs17	thirty_six	aIL10+aPD1_thirty_six	UNS	C09
498	Sample_129	11	23	0.0306667	17.9016	19.5053	3.94703	Sample_129	AI_export_Plate 2 UNS LN_C9_C09_CD8p_CD8_live.fcs	RWs17_aIL10+aPD1_36_UNS	aIL10+aPD1	RWs17	thirty_six	aIL10+aPD1_thirty_six	UNS	C09
499	Sample_129	12	7	0.00933333	8.81358	8.74795	0.951654	Sample_129	AI_export_Plate 2 UNS LN_C9_C09_CD8p_CD8_live.fcs	RWs17_aIL10+aPD1_36_UNS	aIL10+aPD1	RWs17	thirty_six	aIL10+aPD1_thirty_six	UNS	C09
500	Sample_129	13	23	0.0306667	NA	NA	NA	Sample_129	AI_export_Plate 2 UNS LN_C9_C09_CD8p_CD8_live.fcs	RWs17_aIL10+aPD1_36_UNS	aIL10+aPD1	RWs17	thirty_six	aIL10+aPD1_thirty_six	UNS	C09
501	Sample_129	14	2	0.00266667	0.56396	0.56396	8.62169e-10	Sample_129	AI_export_Plate 2 UNS LN_C9_C09_CD8p_CD8_live.fcs	RWs17_aIL10+aPD1_36_UNS	aIL10+aPD1	RWs17	thirty_six	aIL10+aPD1_thirty_six	UNS	C09
502	Sample_129	15	2	0.00266667	NA	NA	NA	Sample_129	AI_export_Plate 2 UNS LN_C9_C09_CD8p_CD8_live.fcs	RWs17_aIL10+aPD1_36_UNS	aIL10+aPD1	RWs17	thirty_six	aIL10+aPD1_thirty_six	UNS	C09
503	Sample_129	2	170	0.226667	4.91034	4.71621	2.41803	Sample_129	AI_export_Plate 2 UNS LN_C9_C09_CD8p_CD8_live.fcs	RWs17_aIL10+aPD1_36_UNS	aIL10+aPD1	RWs17	thirty_six	aIL10+aPD1_thirty_six	UNS	C09
504	Sample_129	3	122	0.162667	3.6403	3.48905	1.56811	Sample_129	AI_export_Plate 2 UNS LN_C9_C09_CD8p_CD8_live.fcs	RWs17_aIL10+aPD1_36_UNS	aIL10+aPD1	RWs17	thirty_six	aIL10+aPD1_thirty_six	UNS	C09
505	Sample_129	4	105	0.14	21.33	22.5806	3.06718	Sample_129	AI_export_Plate 2 UNS LN_C9_C09_CD8p_CD8_live.fcs	RWs17_aIL10+aPD1_36_UNS	aIL10+aPD1	RWs17	thirty_six	aIL10+aPD1_thirty_six	UNS	C09
506	Sample_129	5	58	0.0773333	19.0761	18.9253	1.82275	Sample_129	AI_export_Plate 2 UNS LN_C9_C09_CD8p_CD8_live.fcs	RWs17_aIL10+aPD1_36_UNS	aIL10+aPD1	RWs17	thirty_six	aIL10+aPD1_thirty_six	UNS	C09
507	Sample_129	6	32	0.0426667	18.9218	18.9218	NA	Sample_129	AI_export_Plate 2 UNS LN_C9_C09_CD8p_CD8_live.fcs	RWs17_aIL10+aPD1_36_UNS	aIL10+aPD1	RWs17	thirty_six	aIL10+aPD1_thirty_six	UNS	C09
508	Sample_129	7	16	0.0213333	19.4893	19.5961	0.224915	Sample_129	AI_export_Plate 2 UNS LN_C9_C09_CD8p_CD8_live.fcs	RWs17_aIL10+aPD1_36_UNS	aIL10+aPD1	RWs17	thirty_six	aIL10+aPD1_thirty_six	UNS	C09
509	Sample_129	8	17	0.0226667	12.1552	12.4849	1.12007	Sample_129	AI_export_Plate 2 UNS LN_C9_C09_CD8p_CD8_live.fcs	RWs17_aIL10+aPD1_36_UNS	aIL10+aPD1	RWs17	thirty_six	aIL10+aPD1_thirty_six	UNS	C09
510	Sample_129	9	25	0.0333333	15.3639	15.8914	1.78747	Sample_129	AI_export_Plate 2 UNS LN_C9_C09_CD8p_CD8_live.fcs	RWs17_aIL10+aPD1_36_UNS	aIL10+aPD1	RWs17	thirty_six	aIL10+aPD1_thirty_six	UNS	C09
511	Sample_13	1	145	0.193333	21.7581	21.7505	2.43653	Sample_13	AI_export_Plate 1 UNS LN_B1_B01_CD8p_CD8_live.fcs	RMl17_Control_-1_UNS	Control	RMl17	minus_one	Control_minus_one	UNS	B01
512	Sample_13	10	11	0.0146667	15.4827	15.4634	2.75718	Sample_13	AI_export_Plate 1 UNS LN_B1_B01_CD8p_CD8_live.fcs	RMl17_Control_-1_UNS	Control	RMl17	minus_one	Control_minus_one	UNS	B01
513	Sample_13	11	94	0.125333	19.4514	19.5483	0.48395	Sample_13	AI_export_Plate 1 UNS LN_B1_B01_CD8p_CD8_live.fcs	RMl17_Control_-1_UNS	Control	RMl17	minus_one	Control_minus_one	UNS	B01
514	Sample_13	12	9	0.012	8.8281	9.11941	0.642013	Sample_13	AI_export_Plate 1 UNS LN_B1_B01_CD8p_CD8_live.fcs	RMl17_Control_-1_UNS	Control	RMl17	minus_one	Control_minus_one	UNS	B01
515	Sample_13	13	9	0.012	24.7633	24.7633	NA	Sample_13	AI_export_Plate 1 UNS LN_B1_B01_CD8p_CD8_live.fcs	RMl17_Control_-1_UNS	Control	RMl17	minus_one	Control_minus_one	UNS	B01
516	Sample_13	14	1	0.00133333	19.5483	19.5483	NA	Sample_13	AI_export_Plate 1 UNS LN_B1_B01_CD8p_CD8_live.fcs	RMl17_Control_-1_UNS	Control	RMl17	minus_one	Control_minus_one	UNS	B01
517	Sample_13	15	0	0	NA	NA	NA	Sample_13	AI_export_Plate 1 UNS LN_B1_B01_CD8p_CD8_live.fcs	RMl17_Control_-1_UNS	Control	RMl17	minus_one	Control_minus_one	UNS	B01
518	Sample_13	2	88	0.117333	5.26154	5.56818	2.95577	Sample_13	AI_export_Plate 1 UNS LN_B1_B01_CD8p_CD8_live.fcs	RMl17_Control_-1_UNS	Control	RMl17	minus_one	Control_minus_one	UNS	B01
519	Sample_13	3	45	0.06	4.41368	3.41873	3.76046	Sample_13	AI_export_Plate 1 UNS LN_B1_B01_CD8p_CD8_live.fcs	RMl17_Control_-1_UNS	Control	RMl17	minus_one	Control_minus_one	UNS	B01
520	Sample_13	4	73	0.0973333	NA	NA	NA	Sample_13	AI_export_Plate 1 UNS LN_B1_B01_CD8p_CD8_live.fcs	RMl17_Control_-1_UNS	Control	RMl17	minus_one	Control_minus_one	UNS	B01
521	Sample_13	5	128	0.170667	18.4725	18.5886	1.42871	Sample_13	AI_export_Plate 1 UNS LN_B1_B01_CD8p_CD8_live.fcs	RMl17_Control_-1_UNS	Control	RMl17	minus_one	Control_minus_one	UNS	B01
522	Sample_13	6	8	0.0106667	NA	NA	NA	Sample_13	AI_export_Plate 1 UNS LN_B1_B01_CD8p_CD8_live.fcs	RMl17_Control_-1_UNS	Control	RMl17	minus_one	Control_minus_one	UNS	B01
523	Sample_13	7	22	0.0293333	19.5751	19.5961	0.0923476	Sample_13	AI_export_Plate 1 UNS LN_B1_B01_CD8p_CD8_live.fcs	RMl17_Control_-1_UNS	Control	RMl17	minus_one	Control_minus_one	UNS	B01
524	Sample_13	8	82	0.109333	11.9203	11.9334	1.15567	Sample_13	AI_export_Plate 1 UNS LN_B1_B01_CD8p_CD8_live.fcs	RMl17_Control_-1_UNS	Control	RMl17	minus_one	Control_minus_one	UNS	B01
525	Sample_13	9	35	0.0466667	16.1929	15.9251	1.86927	Sample_13	AI_export_Plate 1 UNS LN_B1_B01_CD8p_CD8_live.fcs	RMl17_Control_-1_UNS	Control	RMl17	minus_one	Control_minus_one	UNS	B01
526	Sample_14	1	105	0.14	21.7651	21.9589	2.50583	Sample_14	AI_export_Plate 1 UNS LN_B10_B10_CD8p_CD8_live.fcs	34897_aIL10_7_UNS	aIL10	34897	seven	aIL10_seven	UNS	B10
527	Sample_14	10	27	0.036	16.4652	16.8451	1.72671	Sample_14	AI_export_Plate 1 UNS LN_B10_B10_CD8p_CD8_live.fcs	34897_aIL10_7_UNS	aIL10	34897	seven	aIL10_seven	UNS	B10
528	Sample_14	11	20	0.0266667	18.1257	19.5483	4.64287	Sample_14	AI_export_Plate 1 UNS LN_B10_B10_CD8p_CD8_live.fcs	34897_aIL10_7_UNS	aIL10	34897	seven	aIL10_seven	UNS	B10
529	Sample_14	12	19	0.0253333	8.9584	8.35159	2.8254	Sample_14	AI_export_Plate 1 UNS LN_B10_B10_CD8p_CD8_live.fcs	34897_aIL10_7_UNS	aIL10	34897	seven	aIL10_seven	UNS	B10
530	Sample_14	13	8	0.0106667	12.2376	12.2376	NA	Sample_14	AI_export_Plate 1 UNS LN_B10_B10_CD8p_CD8_live.fcs	34897_aIL10_7_UNS	aIL10	34897	seven	aIL10_seven	UNS	B10
531	Sample_14	14	1	0.00133333	17.2126	17.2126	NA	Sample_14	AI_export_Plate 1 UNS LN_B10_B10_CD8p_CD8_live.fcs	34897_aIL10_7_UNS	aIL10	34897	seven	aIL10_seven	UNS	B10
532	Sample_14	15	0	0	NA	NA	NA	Sample_14	AI_export_Plate 1 UNS LN_B10_B10_CD8p_CD8_live.fcs	34897_aIL10_7_UNS	aIL10	34897	seven	aIL10_seven	UNS	B10
533	Sample_14	2	183	0.244	4.46805	4.61564	2.24263	Sample_14	AI_export_Plate 1 UNS LN_B10_B10_CD8p_CD8_live.fcs	34897_aIL10_7_UNS	aIL10	34897	seven	aIL10_seven	UNS	B10
534	Sample_14	3	98	0.130667	3.83521	3.60354	2.53935	Sample_14	AI_export_Plate 1 UNS LN_B10_B10_CD8p_CD8_live.fcs	34897_aIL10_7_UNS	aIL10	34897	seven	aIL10_seven	UNS	B10
535	Sample_14	4	70	0.0933333	NA	NA	NA	Sample_14	AI_export_Plate 1 UNS LN_B10_B10_CD8p_CD8_live.fcs	34897_aIL10_7_UNS	aIL10	34897	seven	aIL10_seven	UNS	B10
536	Sample_14	5	100	0.133333	18.4778	18.8246	2.42411	Sample_14	AI_export_Plate 1 UNS LN_B10_B10_CD8p_CD8_live.fcs	34897_aIL10_7_UNS	aIL10	34897	seven	aIL10_seven	UNS	B10
537	Sample_14	6	13	0.0173333	NA	NA	NA	Sample_14	AI_export_Plate 1 UNS LN_B10_B10_CD8p_CD8_live.fcs	34897_aIL10_7_UNS	aIL10	34897	seven	aIL10_seven	UNS	B10
538	Sample_14	7	20	0.0266667	19.5794	19.5961	0.191688	Sample_14	AI_export_Plate 1 UNS LN_B10_B10_CD8p_CD8_live.fcs	34897_aIL10_7_UNS	aIL10	34897	seven	aIL10_seven	UNS	B10
539	Sample_14	8	53	0.0706667	12.0237	11.7791	2.41854	Sample_14	AI_export_Plate 1 UNS LN_B10_B10_CD8p_CD8_live.fcs	34897_aIL10_7_UNS	aIL10	34897	seven	aIL10_seven	UNS	B10
540	Sample_14	9	33	0.044	15.3732	15.7955	1.9081	Sample_14	AI_export_Plate 1 UNS LN_B10_B10_CD8p_CD8_live.fcs	34897_aIL10_7_UNS	aIL10	34897	seven	aIL10_seven	UNS	B10
541	Sample_15	1	118	0.157333	21.6563	21.6928	2.49458	Sample_15	AI_export_Plate 1 UNS LN_B11_B11_CD8p_CD8_live.fcs	RRh17_aIL10+aPD1_7_UNS	aIL10+aPD1	RRh17	seven	aIL10+aPD1_seven	UNS	B11
542	Sample_15	10	13	0.0173333	15.733	15.7355	2.50611	Sample_15	AI_export_Plate 1 UNS LN_B11_B11_CD8p_CD8_live.fcs	RRh17_aIL10+aPD1_7_UNS	aIL10+aPD1	RRh17	seven	aIL10+aPD1_seven	UNS	B11
543	Sample_15	11	42	0.056	18.3046	19.5483	3.73415	Sample_15	AI_export_Plate 1 UNS LN_B11_B11_CD8p_CD8_live.fcs	RRh17_aIL10+aPD1_7_UNS	aIL10+aPD1	RRh17	seven	aIL10+aPD1_seven	UNS	B11
544	Sample_15	12	7	0.00933333	8.49319	8.34817	0.580788	Sample_15	AI_export_Plate 1 UNS LN_B11_B11_CD8p_CD8_live.fcs	RRh17_aIL10+aPD1_7_UNS	aIL10+aPD1	RRh17	seven	aIL10+aPD1_seven	UNS	B11
545	Sample_15	13	4	0.00533333	NA	NA	NA	Sample_15	AI_export_Plate 1 UNS LN_B11_B11_CD8p_CD8_live.fcs	RRh17_aIL10+aPD1_7_UNS	aIL10+aPD1	RRh17	seven	aIL10+aPD1_seven	UNS	B11
546	Sample_15	14	0	0	NA	NA	NA	Sample_15	AI_export_Plate 1 UNS LN_B11_B11_CD8p_CD8_live.fcs	RRh17_aIL10+aPD1_7_UNS	aIL10+aPD1	RRh17	seven	aIL10+aPD1_seven	UNS	B11
547	Sample_15	15	3	0.004	16.9043	16.9043	11.1143	Sample_15	AI_export_Plate 1 UNS LN_B11_B11_CD8p_CD8_live.fcs	RRh17_aIL10+aPD1_7_UNS	aIL10+aPD1	RRh17	seven	aIL10+aPD1_seven	UNS	B11
548	Sample_15	2	199	0.265333	4.54991	4.52472	3.15521	Sample_15	AI_export_Plate 1 UNS LN_B11_B11_CD8p_CD8_live.fcs	RRh17_aIL10+aPD1_7_UNS	aIL10+aPD1	RRh17	seven	aIL10+aPD1_seven	UNS	B11
549	Sample_15	3	76	0.101333	3.44549	3.46464	1.78845	Sample_15	AI_export_Plate 1 UNS LN_B11_B11_CD8p_CD8_live.fcs	RRh17_aIL10+aPD1_7_UNS	aIL10+aPD1	RRh17	seven	aIL10+aPD1_seven	UNS	B11
550	Sample_15	4	38	0.0506667	NA	NA	NA	Sample_15	AI_export_Plate 1 UNS LN_B11_B11_CD8p_CD8_live.fcs	RRh17_aIL10+aPD1_7_UNS	aIL10+aPD1	RRh17	seven	aIL10+aPD1_seven	UNS	B11
551	Sample_15	5	78	0.104	18.6398	18.834	1.61075	Sample_15	AI_export_Plate 1 UNS LN_B11_B11_CD8p_CD8_live.fcs	RRh17_aIL10+aPD1_7_UNS	aIL10+aPD1	RRh17	seven	aIL10+aPD1_seven	UNS	B11
552	Sample_15	6	22	0.0293333	NA	NA	NA	Sample_15	AI_export_Plate 1 UNS LN_B11_B11_CD8p_CD8_live.fcs	RRh17_aIL10+aPD1_7_UNS	aIL10+aPD1	RRh17	seven	aIL10+aPD1_seven	UNS	B11
553	Sample_15	7	63	0.084	19.512	19.5961	0.245907	Sample_15	AI_export_Plate 1 UNS LN_B11_B11_CD8p_CD8_live.fcs	RRh17_aIL10+aPD1_7_UNS	aIL10+aPD1	RRh17	seven	aIL10+aPD1_seven	UNS	B11
554	Sample_15	8	40	0.0533333	12.0381	12.2376	2.52572	Sample_15	AI_export_Plate 1 UNS LN_B11_B11_CD8p_CD8_live.fcs	RRh17_aIL10+aPD1_7_UNS	aIL10+aPD1	RRh17	seven	aIL10+aPD1_seven	UNS	B11
555	Sample_15	9	47	0.0626667	15.7991	15.8914	1.40711	Sample_15	AI_export_Plate 1 UNS LN_B11_B11_CD8p_CD8_live.fcs	RRh17_aIL10+aPD1_7_UNS	aIL10+aPD1	RRh17	seven	aIL10+aPD1_seven	UNS	B11
556	Sample_16	1	135	0.18	21.5231	21.9723	2.98303	Sample_16	AI_export_Plate 1 UNS LN_B12_B12_CD8p_CD8_live.fcs	RFn17_aIL10_7_UNS	aIL10	RFn17	seven	aIL10_seven	UNS	B12
557	Sample_16	10	20	0.0266667	15.1066	15.7355	3.26218	Sample_16	AI_export_Plate 1 UNS LN_B12_B12_CD8p_CD8_live.fcs	RFn17_aIL10_7_UNS	aIL10	RFn17	seven	aIL10_seven	UNS	B12
558	Sample_16	11	37	0.0493333	18.9366	19.5483	2.1367	Sample_16	AI_export_Plate 1 UNS LN_B12_B12_CD8p_CD8_live.fcs	RFn17_aIL10_7_UNS	aIL10	RFn17	seven	aIL10_seven	UNS	B12
559	Sample_16	12	14	0.0186667	8.71957	8.66809	0.540282	Sample_16	AI_export_Plate 1 UNS LN_B12_B12_CD8p_CD8_live.fcs	RFn17_aIL10_7_UNS	aIL10	RFn17	seven	aIL10_seven	UNS	B12
560	Sample_16	13	4	0.00533333	17.3362	17.3362	NA	Sample_16	AI_export_Plate 1 UNS LN_B12_B12_CD8p_CD8_live.fcs	RFn17_aIL10_7_UNS	aIL10	RFn17	seven	aIL10_seven	UNS	B12
561	Sample_16	14	0	0	NA	NA	NA	Sample_16	AI_export_Plate 1 UNS LN_B12_B12_CD8p_CD8_live.fcs	RFn17_aIL10_7_UNS	aIL10	RFn17	seven	aIL10_seven	UNS	B12
562	Sample_16	15	2	0.00266667	NA	NA	NA	Sample_16	AI_export_Plate 1 UNS LN_B12_B12_CD8p_CD8_live.fcs	RFn17_aIL10_7_UNS	aIL10	RFn17	seven	aIL10_seven	UNS	B12
563	Sample_16	2	199	0.265333	4.29073	4.52145	2.02206	Sample_16	AI_export_Plate 1 UNS LN_B12_B12_CD8p_CD8_live.fcs	RFn17_aIL10_7_UNS	aIL10	RFn17	seven	aIL10_seven	UNS	B12
564	Sample_16	3	94	0.125333	4.54129	3.66676	4.6004	Sample_16	AI_export_Plate 1 UNS LN_B12_B12_CD8p_CD8_live.fcs	RFn17_aIL10_7_UNS	aIL10	RFn17	seven	aIL10_seven	UNS	B12
565	Sample_16	4	52	0.0693333	NA	NA	NA	Sample_16	AI_export_Plate 1 UNS LN_B12_B12_CD8p_CD8_live.fcs	RFn17_aIL10_7_UNS	aIL10	RFn17	seven	aIL10_seven	UNS	B12
566	Sample_16	5	119	0.158667	18.6544	18.8055	1.00712	Sample_16	AI_export_Plate 1 UNS LN_B12_B12_CD8p_CD8_live.fcs	RFn17_aIL10_7_UNS	aIL10	RFn17	seven	aIL10_seven	UNS	B12
567	Sample_16	6	8	0.0106667	NA	NA	NA	Sample_16	AI_export_Plate 1 UNS LN_B12_B12_CD8p_CD8_live.fcs	RFn17_aIL10_7_UNS	aIL10	RFn17	seven	aIL10_seven	UNS	B12
568	Sample_16	7	12	0.016	19.5903	19.5961	0.0545753	Sample_16	AI_export_Plate 1 UNS LN_B12_B12_CD8p_CD8_live.fcs	RFn17_aIL10_7_UNS	aIL10	RFn17	seven	aIL10_seven	UNS	B12
569	Sample_16	8	32	0.0426667	12.2543	12.2393	2.58652	Sample_16	AI_export_Plate 1 UNS LN_B12_B12_CD8p_CD8_live.fcs	RFn17_aIL10_7_UNS	aIL10	RFn17	seven	aIL10_seven	UNS	B12
570	Sample_16	9	22	0.0293333	15.9628	15.9211	1.23491	Sample_16	AI_export_Plate 1 UNS LN_B12_B12_CD8p_CD8_live.fcs	RFn17_aIL10_7_UNS	aIL10	RFn17	seven	aIL10_seven	UNS	B12
571	Sample_17	1	78	0.104	21.5347	21.7081	3.24886	Sample_17	AI_export_Plate 1 UNS LN_B2_B02_CD8p_CD8_live.fcs	RIb17_aIL10+aPD1_-1_UNS	aIL10+aPD1	RIb17	minus_one	aIL10+aPD1_minus_one	UNS	B02
572	Sample_17	10	7	0.00933333	13.2162	12.6325	3.78612	Sample_17	AI_export_Plate 1 UNS LN_B2_B02_CD8p_CD8_live.fcs	RIb17_aIL10+aPD1_-1_UNS	aIL10+aPD1	RIb17	minus_one	aIL10+aPD1_minus_one	UNS	B02
573	Sample_17	11	24	0.032	19.4174	19.5483	0.542463	Sample_17	AI_export_Plate 1 UNS LN_B2_B02_CD8p_CD8_live.fcs	RIb17_aIL10+aPD1_-1_UNS	aIL10+aPD1	RIb17	minus_one	aIL10+aPD1_minus_one	UNS	B02
574	Sample_17	12	15	0.02	9.38404	8.92673	2.18071	Sample_17	AI_export_Plate 1 UNS LN_B2_B02_CD8p_CD8_live.fcs	RIb17_aIL10+aPD1_-1_UNS	aIL10+aPD1	RIb17	minus_one	aIL10+aPD1_minus_one	UNS	B02
575	Sample_17	13	9	0.012	NA	NA	NA	Sample_17	AI_export_Plate 1 UNS LN_B2_B02_CD8p_CD8_live.fcs	RIb17_aIL10+aPD1_-1_UNS	aIL10+aPD1	RIb17	minus_one	aIL10+aPD1_minus_one	UNS	B02
576	Sample_17	14	1	0.00133333	19.5483	19.5483	NA	Sample_17	AI_export_Plate 1 UNS LN_B2_B02_CD8p_CD8_live.fcs	RIb17_aIL10+aPD1_-1_UNS	aIL10+aPD1	RIb17	minus_one	aIL10+aPD1_minus_one	UNS	B02
577	Sample_17	15	1	0.00133333	9.34254	9.34254	NA	Sample_17	AI_export_Plate 1 UNS LN_B2_B02_CD8p_CD8_live.fcs	RIb17_aIL10+aPD1_-1_UNS	aIL10+aPD1	RIb17	minus_one	aIL10+aPD1_minus_one	UNS	B02
578	Sample_17	2	348	0.464	4.85647	4.71621	2.23807	Sample_17	AI_export_Plate 1 UNS LN_B2_B02_CD8p_CD8_live.fcs	RIb17_aIL10+aPD1_-1_UNS	aIL10+aPD1	RIb17	minus_one	aIL10+aPD1_minus_one	UNS	B02
579	Sample_17	3	67	0.0893333	4.0346	3.66676	3.67975	Sample_17	AI_export_Plate 1 UNS LN_B2_B02_CD8p_CD8_live.fcs	RIb17_aIL10+aPD1_-1_UNS	aIL10+aPD1	RIb17	minus_one	aIL10+aPD1_minus_one	UNS	B02
580	Sample_17	4	24	0.032	18.9782	18.9782	NA	Sample_17	AI_export_Plate 1 UNS LN_B2_B02_CD8p_CD8_live.fcs	RIb17_aIL10+aPD1_-1_UNS	aIL10+aPD1	RIb17	minus_one	aIL10+aPD1_minus_one	UNS	B02
581	Sample_17	5	101	0.134667	18.2617	18.511	1.68142	Sample_17	AI_export_Plate 1 UNS LN_B2_B02_CD8p_CD8_live.fcs	RIb17_aIL10+aPD1_-1_UNS	aIL10+aPD1	RIb17	minus_one	aIL10+aPD1_minus_one	UNS	B02
582	Sample_17	6	5	0.00666667	NA	NA	NA	Sample_17	AI_export_Plate 1 UNS LN_B2_B02_CD8p_CD8_live.fcs	RIb17_aIL10+aPD1_-1_UNS	aIL10+aPD1	RIb17	minus_one	aIL10+aPD1_minus_one	UNS	B02
583	Sample_17	7	9	0.012	19.5956	19.5961	0.0665599	Sample_17	AI_export_Plate 1 UNS LN_B2_B02_CD8p_CD8_live.fcs	RIb17_aIL10+aPD1_-1_UNS	aIL10+aPD1	RIb17	minus_one	aIL10+aPD1_minus_one	UNS	B02
584	Sample_17	8	36	0.048	11.8375	11.9848	1.09837	Sample_17	AI_export_Plate 1 UNS LN_B2_B02_CD8p_CD8_live.fcs	RIb17_aIL10+aPD1_-1_UNS	aIL10+aPD1	RIb17	minus_one	aIL10+aPD1_minus_one	UNS	B02
585	Sample_17	9	25	0.0333333	15.7608	15.8914	0.921943	Sample_17	AI_export_Plate 1 UNS LN_B2_B02_CD8p_CD8_live.fcs	RIb17_aIL10+aPD1_-1_UNS	aIL10+aPD1	RIb17	minus_one	aIL10+aPD1_minus_one	UNS	B02
586	Sample_18	1	124	0.165333	21.2839	21.2996	3.33868	Sample_18	AI_export_Plate 1 UNS LN_B3_B03_CD8p_CD8_live.fcs	RFl17_aIL10+aPD1_7_UNS	aIL10+aPD1	RFl17	seven	aIL10+aPD1_seven	UNS	B03
587	Sample_18	10	7	0.00933333	13.763	15.2373	4.03153	Sample_18	AI_export_Plate 1 UNS LN_B3_B03_CD8p_CD8_live.fcs	RFl17_aIL10+aPD1_7_UNS	aIL10+aPD1	RFl17	seven	aIL10+aPD1_seven	UNS	B03
588	Sample_18	11	23	0.0306667	18.649	19.5483	1.28396	Sample_18	AI_export_Plate 1 UNS LN_B3_B03_CD8p_CD8_live.fcs	RFl17_aIL10+aPD1_7_UNS	aIL10+aPD1	RFl17	seven	aIL10+aPD1_seven	UNS	B03
589	Sample_18	12	10	0.0133333	10.3986	8.90409	5.07015	Sample_18	AI_export_Plate 1 UNS LN_B3_B03_CD8p_CD8_live.fcs	RFl17_aIL10+aPD1_7_UNS	aIL10+aPD1	RFl17	seven	aIL10+aPD1_seven	UNS	B03
590	Sample_18	13	8	0.0106667	8.69682	8.69682	NA	Sample_18	AI_export_Plate 1 UNS LN_B3_B03_CD8p_CD8_live.fcs	RFl17_aIL10+aPD1_7_UNS	aIL10+aPD1	RFl17	seven	aIL10+aPD1_seven	UNS	B03
591	Sample_18	14	0	0	NA	NA	NA	Sample_18	AI_export_Plate 1 UNS LN_B3_B03_CD8p_CD8_live.fcs	RFl17_aIL10+aPD1_7_UNS	aIL10+aPD1	RFl17	seven	aIL10+aPD1_seven	UNS	B03
592	Sample_18	15	1	0.00133333	9.34254	9.34254	NA	Sample_18	AI_export_Plate 1 UNS LN_B3_B03_CD8p_CD8_live.fcs	RFl17_aIL10+aPD1_7_UNS	aIL10+aPD1	RFl17	seven	aIL10+aPD1_seven	UNS	B03
593	Sample_18	2	197	0.262667	4.64524	4.70245	2.18991	Sample_18	AI_export_Plate 1 UNS LN_B3_B03_CD8p_CD8_live.fcs	RFl17_aIL10+aPD1_7_UNS	aIL10+aPD1	RFl17	seven	aIL10+aPD1_seven	UNS	B03
594	Sample_18	3	34	0.0453333	3.79465	3.55892	2.73187	Sample_18	AI_export_Plate 1 UNS LN_B3_B03_CD8p_CD8_live.fcs	RFl17_aIL10+aPD1_7_UNS	aIL10+aPD1	RFl17	seven	aIL10+aPD1_seven	UNS	B03
595	Sample_18	4	64	0.0853333	NA	NA	NA	Sample_18	AI_export_Plate 1 UNS LN_B3_B03_CD8p_CD8_live.fcs	RFl17_aIL10+aPD1_7_UNS	aIL10+aPD1	RFl17	seven	aIL10+aPD1_seven	UNS	B03
596	Sample_18	5	180	0.24	18.397	18.5097	1.24051	Sample_18	AI_export_Plate 1 UNS LN_B3_B03_CD8p_CD8_live.fcs	RFl17_aIL10+aPD1_7_UNS	aIL10+aPD1	RFl17	seven	aIL10+aPD1_seven	UNS	B03
597	Sample_18	6	13	0.0173333	NA	NA	NA	Sample_18	AI_export_Plate 1 UNS LN_B3_B03_CD8p_CD8_live.fcs	RFl17_aIL10+aPD1_7_UNS	aIL10+aPD1	RFl17	seven	aIL10+aPD1_seven	UNS	B03
598	Sample_18	7	12	0.016	19.5723	19.5961	0.0401441	Sample_18	AI_export_Plate 1 UNS LN_B3_B03_CD8p_CD8_live.fcs	RFl17_aIL10+aPD1_7_UNS	aIL10+aPD1	RFl17	seven	aIL10+aPD1_seven	UNS	B03
599	Sample_18	8	50	0.0666667	12.0904	12.3862	1.66583	Sample_18	AI_export_Plate 1 UNS LN_B3_B03_CD8p_CD8_live.fcs	RFl17_aIL10+aPD1_7_UNS	aIL10+aPD1	RFl17	seven	aIL10+aPD1_seven	UNS	B03
600	Sample_18	9	27	0.036	16.1149	15.9247	0.970065	Sample_18	AI_export_Plate 1 UNS LN_B3_B03_CD8p_CD8_live.fcs	RFl17_aIL10+aPD1_7_UNS	aIL10+aPD1	RFl17	seven	aIL10+aPD1_seven	UNS	B03
601	Sample_19	1	99	0.132	21.7268	21.6047	2.54651	Sample_19	AI_export_Plate 1 UNS LN_B4_B04_CD8p_CD8_live.fcs	RYk17_aIL10_7_UNS	aIL10	RYk17	seven	aIL10_seven	UNS	B04
602	Sample_19	10	8	0.0106667	13.4959	12.0895	4.3389	Sample_19	AI_export_Plate 1 UNS LN_B4_B04_CD8p_CD8_live.fcs	RYk17_aIL10_7_UNS	aIL10	RYk17	seven	aIL10_seven	UNS	B04
603	Sample_19	11	21	0.028	19.183	19.5483	1.59009	Sample_19	AI_export_Plate 1 UNS LN_B4_B04_CD8p_CD8_live.fcs	RYk17_aIL10_7_UNS	aIL10	RYk17	seven	aIL10_seven	UNS	B04
604	Sample_19	12	28	0.0373333	8.56803	8.47983	0.475062	Sample_19	AI_export_Plate 1 UNS LN_B4_B04_CD8p_CD8_live.fcs	RYk17_aIL10_7_UNS	aIL10	RYk17	seven	aIL10_seven	UNS	B04
605	Sample_19	13	9	0.012	17.9461	17.9461	NA	Sample_19	AI_export_Plate 1 UNS LN_B4_B04_CD8p_CD8_live.fcs	RYk17_aIL10_7_UNS	aIL10	RYk17	seven	aIL10_seven	UNS	B04
606	Sample_19	14	2	0.00266667	0.56396	0.56396	NA	Sample_19	AI_export_Plate 1 UNS LN_B4_B04_CD8p_CD8_live.fcs	RYk17_aIL10_7_UNS	aIL10	RYk17	seven	aIL10_seven	UNS	B04
607	Sample_19	15	1	0.00133333	9.04525	9.04525	NA	Sample_19	AI_export_Plate 1 UNS LN_B4_B04_CD8p_CD8_live.fcs	RYk17_aIL10_7_UNS	aIL10	RYk17	seven	aIL10_seven	UNS	B04
608	Sample_19	2	219	0.292	4.89405	4.72841	2.39482	Sample_19	AI_export_Plate 1 UNS LN_B4_B04_CD8p_CD8_live.fcs	RYk17_aIL10_7_UNS	aIL10	RYk17	seven	aIL10_seven	UNS	B04
609	Sample_19	3	144	0.192	4.25383	3.66676	2.75426	Sample_19	AI_export_Plate 1 UNS LN_B4_B04_CD8p_CD8_live.fcs	RYk17_aIL10_7_UNS	aIL10	RYk17	seven	aIL10_seven	UNS	B04
610	Sample_19	4	43	0.0573333	NA	NA	NA	Sample_19	AI_export_Plate 1 UNS LN_B4_B04_CD8p_CD8_live.fcs	RYk17_aIL10_7_UNS	aIL10	RYk17	seven	aIL10_seven	UNS	B04
611	Sample_19	5	49	0.0653333	17.862	18.3285	2.36142	Sample_19	AI_export_Plate 1 UNS LN_B4_B04_CD8p_CD8_live.fcs	RYk17_aIL10_7_UNS	aIL10	RYk17	seven	aIL10_seven	UNS	B04
612	Sample_19	6	19	0.0253333	19.5021	19.5021	NA	Sample_19	AI_export_Plate 1 UNS LN_B4_B04_CD8p_CD8_live.fcs	RYk17_aIL10_7_UNS	aIL10	RYk17	seven	aIL10_seven	UNS	B04
613	Sample_19	7	8	0.0106667	19.4619	19.5491	0.196318	Sample_19	AI_export_Plate 1 UNS LN_B4_B04_CD8p_CD8_live.fcs	RYk17_aIL10_7_UNS	aIL10	RYk17	seven	aIL10_seven	UNS	B04
614	Sample_19	8	64	0.0853333	11.154	11.213	1.16586	Sample_19	AI_export_Plate 1 UNS LN_B4_B04_CD8p_CD8_live.fcs	RYk17_aIL10_7_UNS	aIL10	RYk17	seven	aIL10_seven	UNS	B04
615	Sample_19	9	36	0.048	15.3656	15.8914	2.28271	Sample_19	AI_export_Plate 1 UNS LN_B4_B04_CD8p_CD8_live.fcs	RYk17_aIL10_7_UNS	aIL10	RYk17	seven	aIL10_seven	UNS	B04
616	Sample_2	1	102	0.136	21.7854	21.8339	2.59849	Sample_2	AI_export_Plate 1 UNS LN_A10_A10_CD8p_CD8_live.fcs	RFn17_aIL10_-1_UNS	aIL10	RFn17	minus_one	aIL10_minus_one	UNS	A10
617	Sample_2	10	8	0.0106667	15.2767	15.6529	2.67825	Sample_2	AI_export_Plate 1 UNS LN_A10_A10_CD8p_CD8_live.fcs	RFn17_aIL10_-1_UNS	aIL10	RFn17	minus_one	aIL10_minus_one	UNS	A10
618	Sample_2	11	57	0.076	19.0958	19.5483	2.15327	Sample_2	AI_export_Plate 1 UNS LN_A10_A10_CD8p_CD8_live.fcs	RFn17_aIL10_-1_UNS	aIL10	RFn17	minus_one	aIL10_minus_one	UNS	A10
619	Sample_2	12	9	0.012	9.4297	9.05474	1.39791	Sample_2	AI_export_Plate 1 UNS LN_A10_A10_CD8p_CD8_live.fcs	RFn17_aIL10_-1_UNS	aIL10	RFn17	minus_one	aIL10_minus_one	UNS	A10
620	Sample_2	13	6	0.008	NA	NA	NA	Sample_2	AI_export_Plate 1 UNS LN_A10_A10_CD8p_CD8_live.fcs	RFn17_aIL10_-1_UNS	aIL10	RFn17	minus_one	aIL10_minus_one	UNS	A10
621	Sample_2	14	1	0.00133333	NA	NA	NA	Sample_2	AI_export_Plate 1 UNS LN_A10_A10_CD8p_CD8_live.fcs	RFn17_aIL10_-1_UNS	aIL10	RFn17	minus_one	aIL10_minus_one	UNS	A10
622	Sample_2	15	2	0.00266667	7.98988	7.98988	NA	Sample_2	AI_export_Plate 1 UNS LN_A10_A10_CD8p_CD8_live.fcs	RFn17_aIL10_-1_UNS	aIL10	RFn17	minus_one	aIL10_minus_one	UNS	A10
623	Sample_2	2	151	0.201333	4.45486	4.52145	2.62892	Sample_2	AI_export_Plate 1 UNS LN_A10_A10_CD8p_CD8_live.fcs	RFn17_aIL10_-1_UNS	aIL10	RFn17	minus_one	aIL10_minus_one	UNS	A10
624	Sample_2	3	48	0.064	3.6095	3.35591	1.74074	Sample_2	AI_export_Plate 1 UNS LN_A10_A10_CD8p_CD8_live.fcs	RFn17_aIL10_-1_UNS	aIL10	RFn17	minus_one	aIL10_minus_one	UNS	A10
625	Sample_2	4	117	0.156	NA	NA	NA	Sample_2	AI_export_Plate 1 UNS LN_A10_A10_CD8p_CD8_live.fcs	RFn17_aIL10_-1_UNS	aIL10	RFn17	minus_one	aIL10_minus_one	UNS	A10
626	Sample_2	5	130	0.173333	18.231	18.5115	1.9643	Sample_2	AI_export_Plate 1 UNS LN_A10_A10_CD8p_CD8_live.fcs	RFn17_aIL10_-1_UNS	aIL10	RFn17	minus_one	aIL10_minus_one	UNS	A10
627	Sample_2	6	7	0.00933333	NA	NA	NA	Sample_2	AI_export_Plate 1 UNS LN_A10_A10_CD8p_CD8_live.fcs	RFn17_aIL10_-1_UNS	aIL10	RFn17	minus_one	aIL10_minus_one	UNS	A10
628	Sample_2	7	11	0.0146667	19.5823	19.5961	0.0316859	Sample_2	AI_export_Plate 1 UNS LN_A10_A10_CD8p_CD8_live.fcs	RFn17_aIL10_-1_UNS	aIL10	RFn17	minus_one	aIL10_minus_one	UNS	A10
629	Sample_2	8	35	0.0466667	11.5744	12.2376	1.88338	Sample_2	AI_export_Plate 1 UNS LN_A10_A10_CD8p_CD8_live.fcs	RFn17_aIL10_-1_UNS	aIL10	RFn17	minus_one	aIL10_minus_one	UNS	A10
630	Sample_2	9	66	0.088	15.8783	15.7367	0.979385	Sample_2	AI_export_Plate 1 UNS LN_A10_A10_CD8p_CD8_live.fcs	RFn17_aIL10_-1_UNS	aIL10	RFn17	minus_one	aIL10_minus_one	UNS	A10
631	Sample_20	1	91	0.121333	21.6401	21.9505	2.60356	Sample_20	AI_export_Plate 1 UNS LN_B5_B05_CD8p_CD8_live.fcs	RVz16_Control_7_UNS	Control	RVz16	seven	Control_seven	UNS	B05
632	Sample_20	10	15	0.02	14.2544	15.1873	3.24651	Sample_20	AI_export_Plate 1 UNS LN_B5_B05_CD8p_CD8_live.fcs	RVz16_Control_7_UNS	Control	RVz16	seven	Control_seven	UNS	B05
633	Sample_20	11	18	0.024	19.1616	19.5483	0.922215	Sample_20	AI_export_Plate 1 UNS LN_B5_B05_CD8p_CD8_live.fcs	RVz16_Control_7_UNS	Control	RVz16	seven	Control_seven	UNS	B05
634	Sample_20	12	15	0.02	8.78541	8.72674	0.580143	Sample_20	AI_export_Plate 1 UNS LN_B5_B05_CD8p_CD8_live.fcs	RVz16_Control_7_UNS	Control	RVz16	seven	Control_seven	UNS	B05
635	Sample_20	13	5	0.00666667	NA	NA	NA	Sample_20	AI_export_Plate 1 UNS LN_B5_B05_CD8p_CD8_live.fcs	RVz16_Control_7_UNS	Control	RVz16	seven	Control_seven	UNS	B05
636	Sample_20	14	1	0.00133333	0.56396	0.56396	NA	Sample_20	AI_export_Plate 1 UNS LN_B5_B05_CD8p_CD8_live.fcs	RVz16_Control_7_UNS	Control	RVz16	seven	Control_seven	UNS	B05
637	Sample_20	15	2	0.00266667	9.04525	9.04525	NA	Sample_20	AI_export_Plate 1 UNS LN_B5_B05_CD8p_CD8_live.fcs	RVz16_Control_7_UNS	Control	RVz16	seven	Control_seven	UNS	B05
638	Sample_20	2	247	0.329333	4.5165	4.585	2.48257	Sample_20	AI_export_Plate 1 UNS LN_B5_B05_CD8p_CD8_live.fcs	RVz16_Control_7_UNS	Control	RVz16	seven	Control_seven	UNS	B05
639	Sample_20	3	113	0.150667	3.72677	3.54247	1.79371	Sample_20	AI_export_Plate 1 UNS LN_B5_B05_CD8p_CD8_live.fcs	RVz16_Control_7_UNS	Control	RVz16	seven	Control_seven	UNS	B05
640	Sample_20	4	44	0.0586667	NA	NA	NA	Sample_20	AI_export_Plate 1 UNS LN_B5_B05_CD8p_CD8_live.fcs	RVz16_Control_7_UNS	Control	RVz16	seven	Control_seven	UNS	B05
641	Sample_20	5	84	0.112	18.1549	18.6721	2.23524	Sample_20	AI_export_Plate 1 UNS LN_B5_B05_CD8p_CD8_live.fcs	RVz16_Control_7_UNS	Control	RVz16	seven	Control_seven	UNS	B05
642	Sample_20	6	17	0.0226667	NA	NA	NA	Sample_20	AI_export_Plate 1 UNS LN_B5_B05_CD8p_CD8_live.fcs	RVz16_Control_7_UNS	Control	RVz16	seven	Control_seven	UNS	B05
643	Sample_20	7	9	0.012	19.4692	19.5961	0.346806	Sample_20	AI_export_Plate 1 UNS LN_B5_B05_CD8p_CD8_live.fcs	RVz16_Control_7_UNS	Control	RVz16	seven	Control_seven	UNS	B05
644	Sample_20	8	60	0.08	11.1205	11.7595	1.55053	Sample_20	AI_export_Plate 1 UNS LN_B5_B05_CD8p_CD8_live.fcs	RVz16_Control_7_UNS	Control	RVz16	seven	Control_seven	UNS	B05
645	Sample_20	9	29	0.0386667	15.9926	15.9253	0.986962	Sample_20	AI_export_Plate 1 UNS LN_B5_B05_CD8p_CD8_live.fcs	RVz16_Control_7_UNS	Control	RVz16	seven	Control_seven	UNS	B05
646	Sample_21	1	125	0.166667	21.6271	21.7313	2.4202	Sample_21	AI_export_Plate 1 UNS LN_B6_B06_CD8p_CD8_live.fcs	RYm17_aIL10+aPD1_7_UNS	aIL10+aPD1	RYm17	seven	aIL10+aPD1_seven	UNS	B06
647	Sample_21	10	26	0.0346667	16.2178	16.6825	2.34213	Sample_21	AI_export_Plate 1 UNS LN_B6_B06_CD8p_CD8_live.fcs	RYm17_aIL10+aPD1_7_UNS	aIL10+aPD1	RYm17	seven	aIL10+aPD1_seven	UNS	B06
648	Sample_21	11	29	0.0386667	19.4802	19.5483	1.25623	Sample_21	AI_export_Plate 1 UNS LN_B6_B06_CD8p_CD8_live.fcs	RYm17_aIL10+aPD1_7_UNS	aIL10+aPD1	RYm17	seven	aIL10+aPD1_seven	UNS	B06
649	Sample_21	12	9	0.012	8.78356	9.00659	2.28568	Sample_21	AI_export_Plate 1 UNS LN_B6_B06_CD8p_CD8_live.fcs	RYm17_aIL10+aPD1_7_UNS	aIL10+aPD1	RYm17	seven	aIL10+aPD1_seven	UNS	B06
650	Sample_21	13	32	0.0426667	NA	NA	NA	Sample_21	AI_export_Plate 1 UNS LN_B6_B06_CD8p_CD8_live.fcs	RYm17_aIL10+aPD1_7_UNS	aIL10+aPD1	RYm17	seven	aIL10+aPD1_seven	UNS	B06
651	Sample_21	14	0	0	NA	NA	NA	Sample_21	AI_export_Plate 1 UNS LN_B6_B06_CD8p_CD8_live.fcs	RYm17_aIL10+aPD1_7_UNS	aIL10+aPD1	RYm17	seven	aIL10+aPD1_seven	UNS	B06
652	Sample_21	15	2	0.00266667	14.1229	14.1229	7.18089	Sample_21	AI_export_Plate 1 UNS LN_B6_B06_CD8p_CD8_live.fcs	RYm17_aIL10+aPD1_7_UNS	aIL10+aPD1	RYm17	seven	aIL10+aPD1_seven	UNS	B06
653	Sample_21	2	162	0.216	4.53995	4.61832	2.44788	Sample_21	AI_export_Plate 1 UNS LN_B6_B06_CD8p_CD8_live.fcs	RYm17_aIL10+aPD1_7_UNS	aIL10+aPD1	RYm17	seven	aIL10+aPD1_seven	UNS	B06
654	Sample_21	3	86	0.114667	3.95466	3.53024	3.11521	Sample_21	AI_export_Plate 1 UNS LN_B6_B06_CD8p_CD8_live.fcs	RYm17_aIL10+aPD1_7_UNS	aIL10+aPD1	RYm17	seven	aIL10+aPD1_seven	UNS	B06
655	Sample_21	4	64	0.0853333	NA	NA	NA	Sample_21	AI_export_Plate 1 UNS LN_B6_B06_CD8p_CD8_live.fcs	RYm17_aIL10+aPD1_7_UNS	aIL10+aPD1	RYm17	seven	aIL10+aPD1_seven	UNS	B06
656	Sample_21	5	118	0.157333	18.2645	18.8073	2.45301	Sample_21	AI_export_Plate 1 UNS LN_B6_B06_CD8p_CD8_live.fcs	RYm17_aIL10+aPD1_7_UNS	aIL10+aPD1	RYm17	seven	aIL10+aPD1_seven	UNS	B06
657	Sample_21	6	28	0.0373333	19.5021	19.5021	NA	Sample_21	AI_export_Plate 1 UNS LN_B6_B06_CD8p_CD8_live.fcs	RYm17_aIL10+aPD1_7_UNS	aIL10+aPD1	RYm17	seven	aIL10+aPD1_seven	UNS	B06
658	Sample_21	7	16	0.0213333	19.56	19.5961	0.0605973	Sample_21	AI_export_Plate 1 UNS LN_B6_B06_CD8p_CD8_live.fcs	RYm17_aIL10+aPD1_7_UNS	aIL10+aPD1	RYm17	seven	aIL10+aPD1_seven	UNS	B06
659	Sample_21	8	39	0.052	11.2545	11.79	1.54115	Sample_21	AI_export_Plate 1 UNS LN_B6_B06_CD8p_CD8_live.fcs	RYm17_aIL10+aPD1_7_UNS	aIL10+aPD1	RYm17	seven	aIL10+aPD1_seven	UNS	B06
660	Sample_21	9	14	0.0186667	15.2147	15.5158	0.746253	Sample_21	AI_export_Plate 1 UNS LN_B6_B06_CD8p_CD8_live.fcs	RYm17_aIL10+aPD1_7_UNS	aIL10+aPD1	RYm17	seven	aIL10+aPD1_seven	UNS	B06
661	Sample_22	1	128	0.170667	21.9758	22.4267	2.4338	Sample_22	AI_export_Plate 1 UNS LN_B7_B07_CD8p_CD8_live.fcs	RHm17_aIL10_7_UNS	aIL10	RHm17	seven	aIL10_seven	UNS	B07
662	Sample_22	10	15	0.02	12.2798	9.96929	3.16161	Sample_22	AI_export_Plate 1 UNS LN_B7_B07_CD8p_CD8_live.fcs	RHm17_aIL10_7_UNS	aIL10	RHm17	seven	aIL10_seven	UNS	B07
663	Sample_22	11	38	0.0506667	19.0243	19.5483	2.60303	Sample_22	AI_export_Plate 1 UNS LN_B7_B07_CD8p_CD8_live.fcs	RHm17_aIL10_7_UNS	aIL10	RHm17	seven	aIL10_seven	UNS	B07
664	Sample_22	12	15	0.02	9.92823	8.78817	4.47065	Sample_22	AI_export_Plate 1 UNS LN_B7_B07_CD8p_CD8_live.fcs	RHm17_aIL10_7_UNS	aIL10	RHm17	seven	aIL10_seven	UNS	B07
665	Sample_22	13	4	0.00533333	NA	NA	NA	Sample_22	AI_export_Plate 1 UNS LN_B7_B07_CD8p_CD8_live.fcs	RHm17_aIL10_7_UNS	aIL10	RHm17	seven	aIL10_seven	UNS	B07
666	Sample_22	14	2	0.00266667	4.99909e-08	4.99909e-08	1.72434e-09	Sample_22	AI_export_Plate 1 UNS LN_B7_B07_CD8p_CD8_live.fcs	RHm17_aIL10_7_UNS	aIL10	RHm17	seven	aIL10_seven	UNS	B07
667	Sample_22	15	3	0.004	9.04525	9.04525	NA	Sample_22	AI_export_Plate 1 UNS LN_B7_B07_CD8p_CD8_live.fcs	RHm17_aIL10_7_UNS	aIL10	RHm17	seven	aIL10_seven	UNS	B07
668	Sample_22	2	217	0.289333	4.25927	4.58144	2.28663	Sample_22	AI_export_Plate 1 UNS LN_B7_B07_CD8p_CD8_live.fcs	RHm17_aIL10_7_UNS	aIL10	RHm17	seven	aIL10_seven	UNS	B07
669	Sample_22	3	85	0.113333	3.38196	3.12105	1.83136	Sample_22	AI_export_Plate 1 UNS LN_B7_B07_CD8p_CD8_live.fcs	RHm17_aIL10_7_UNS	aIL10	RHm17	seven	aIL10_seven	UNS	B07
670	Sample_22	4	35	0.0466667	11.5054	11.5054	1.87183	Sample_22	AI_export_Plate 1 UNS LN_B7_B07_CD8p_CD8_live.fcs	RHm17_aIL10_7_UNS	aIL10	RHm17	seven	aIL10_seven	UNS	B07
671	Sample_22	5	127	0.169333	18.5407	18.8388	1.56469	Sample_22	AI_export_Plate 1 UNS LN_B7_B07_CD8p_CD8_live.fcs	RHm17_aIL10_7_UNS	aIL10	RHm17	seven	aIL10_seven	UNS	B07
672	Sample_22	6	10	0.0133333	NA	NA	NA	Sample_22	AI_export_Plate 1 UNS LN_B7_B07_CD8p_CD8_live.fcs	RHm17_aIL10_7_UNS	aIL10	RHm17	seven	aIL10_seven	UNS	B07
673	Sample_22	7	8	0.0106667	19.4391	19.5961	0.296243	Sample_22	AI_export_Plate 1 UNS LN_B7_B07_CD8p_CD8_live.fcs	RHm17_aIL10_7_UNS	aIL10	RHm17	seven	aIL10_seven	UNS	B07
674	Sample_22	8	37	0.0493333	11.8694	11.7791	1.55303	Sample_22	AI_export_Plate 1 UNS LN_B7_B07_CD8p_CD8_live.fcs	RHm17_aIL10_7_UNS	aIL10	RHm17	seven	aIL10_seven	UNS	B07
675	Sample_22	9	26	0.0346667	16.0663	15.8914	1.84577	Sample_22	AI_export_Plate 1 UNS LN_B7_B07_CD8p_CD8_live.fcs	RHm17_aIL10_7_UNS	aIL10	RHm17	seven	aIL10_seven	UNS	B07
676	Sample_23	1	153	0.204	21.1019	21.4135	3.46556	Sample_23	AI_export_Plate 1 UNS LN_B8_B08_CD8p_CD8_live.fcs	RNy16_aIL10+aPD1_7_UNS	aIL10+aPD1	RNy16	seven	aIL10+aPD1_seven	UNS	B08
677	Sample_23	10	19	0.0253333	15.8695	15.7355	2.04186	Sample_23	AI_export_Plate 1 UNS LN_B8_B08_CD8p_CD8_live.fcs	RNy16_aIL10+aPD1_7_UNS	aIL10+aPD1	RNy16	seven	aIL10+aPD1_seven	UNS	B08
678	Sample_23	11	34	0.0453333	18.5926	19.5483	3.04737	Sample_23	AI_export_Plate 1 UNS LN_B8_B08_CD8p_CD8_live.fcs	RNy16_aIL10+aPD1_7_UNS	aIL10+aPD1	RNy16	seven	aIL10+aPD1_seven	UNS	B08
679	Sample_23	12	11	0.0146667	11.9343	8.92673	5.59844	Sample_23	AI_export_Plate 1 UNS LN_B8_B08_CD8p_CD8_live.fcs	RNy16_aIL10+aPD1_7_UNS	aIL10+aPD1	RNy16	seven	aIL10+aPD1_seven	UNS	B08
680	Sample_23	13	2	0.00266667	NA	NA	NA	Sample_23	AI_export_Plate 1 UNS LN_B8_B08_CD8p_CD8_live.fcs	RNy16_aIL10+aPD1_7_UNS	aIL10+aPD1	RNy16	seven	aIL10+aPD1_seven	UNS	B08
681	Sample_23	14	0	0	NA	NA	NA	Sample_23	AI_export_Plate 1 UNS LN_B8_B08_CD8p_CD8_live.fcs	RNy16_aIL10+aPD1_7_UNS	aIL10+aPD1	RNy16	seven	aIL10+aPD1_seven	UNS	B08
682	Sample_23	15	3	0.004	14.4828	9.34254	8.90319	Sample_23	AI_export_Plate 1 UNS LN_B8_B08_CD8p_CD8_live.fcs	RNy16_aIL10+aPD1_7_UNS	aIL10+aPD1	RNy16	seven	aIL10+aPD1_seven	UNS	B08
683	Sample_23	2	198	0.264	4.57086	4.66998	2.48435	Sample_23	AI_export_Plate 1 UNS LN_B8_B08_CD8p_CD8_live.fcs	RNy16_aIL10+aPD1_7_UNS	aIL10+aPD1	RNy16	seven	aIL10+aPD1_seven	UNS	B08
684	Sample_23	3	92	0.122667	4.05692	3.66676	2.32759	Sample_23	AI_export_Plate 1 UNS LN_B8_B08_CD8p_CD8_live.fcs	RNy16_aIL10+aPD1_7_UNS	aIL10+aPD1	RNy16	seven	aIL10+aPD1_seven	UNS	B08
685	Sample_23	4	27	0.036	NA	NA	NA	Sample_23	AI_export_Plate 1 UNS LN_B8_B08_CD8p_CD8_live.fcs	RNy16_aIL10+aPD1_7_UNS	aIL10+aPD1	RNy16	seven	aIL10+aPD1_seven	UNS	B08
686	Sample_23	5	121	0.161333	18.3807	18.5218	1.74209	Sample_23	AI_export_Plate 1 UNS LN_B8_B08_CD8p_CD8_live.fcs	RNy16_aIL10+aPD1_7_UNS	aIL10+aPD1	RNy16	seven	aIL10+aPD1_seven	UNS	B08
687	Sample_23	6	9	0.012	NA	NA	NA	Sample_23	AI_export_Plate 1 UNS LN_B8_B08_CD8p_CD8_live.fcs	RNy16_aIL10+aPD1_7_UNS	aIL10+aPD1	RNy16	seven	aIL10+aPD1_seven	UNS	B08
688	Sample_23	7	14	0.0186667	19.5364	19.5961	0.136083	Sample_23	AI_export_Plate 1 UNS LN_B8_B08_CD8p_CD8_live.fcs	RNy16_aIL10+aPD1_7_UNS	aIL10+aPD1	RNy16	seven	aIL10+aPD1_seven	UNS	B08
689	Sample_23	8	24	0.032	12.3243	11.9962	3.03089	Sample_23	AI_export_Plate 1 UNS LN_B8_B08_CD8p_CD8_live.fcs	RNy16_aIL10+aPD1_7_UNS	aIL10+aPD1	RNy16	seven	aIL10+aPD1_seven	UNS	B08
690	Sample_23	9	43	0.0573333	16.0575	15.8914	0.906494	Sample_23	AI_export_Plate 1 UNS LN_B8_B08_CD8p_CD8_live.fcs	RNy16_aIL10+aPD1_7_UNS	aIL10+aPD1	RNy16	seven	aIL10+aPD1_seven	UNS	B08
691	Sample_24	1	173	0.230667	21.8816	22.0472	2.45357	Sample_24	AI_export_Plate 1 UNS LN_B9_B09_CD8p_CD8_live.fcs	RTd17_Control_7_UNS	Control	RTd17	seven	Control_seven	UNS	B09
692	Sample_24	10	16	0.0213333	16.1724	17.0089	2.89362	Sample_24	AI_export_Plate 1 UNS LN_B9_B09_CD8p_CD8_live.fcs	RTd17_Control_7_UNS	Control	RTd17	seven	Control_seven	UNS	B09
693	Sample_24	11	62	0.0826667	19.0136	19.5483	2.37472	Sample_24	AI_export_Plate 1 UNS LN_B9_B09_CD8p_CD8_live.fcs	RTd17_Control_7_UNS	Control	RTd17	seven	Control_seven	UNS	B09
694	Sample_24	12	13	0.0173333	8.91604	8.75742	0.539534	Sample_24	AI_export_Plate 1 UNS LN_B9_B09_CD8p_CD8_live.fcs	RTd17_Control_7_UNS	Control	RTd17	seven	Control_seven	UNS	B09
695	Sample_24	13	7	0.00933333	NA	NA	NA	Sample_24	AI_export_Plate 1 UNS LN_B9_B09_CD8p_CD8_live.fcs	RTd17_Control_7_UNS	Control	RTd17	seven	Control_seven	UNS	B09
696	Sample_24	14	1	0.00133333	23.2992	23.2992	NA	Sample_24	AI_export_Plate 1 UNS LN_B9_B09_CD8p_CD8_live.fcs	RTd17_Control_7_UNS	Control	RTd17	seven	Control_seven	UNS	B09
697	Sample_24	15	0	0	NA	NA	NA	Sample_24	AI_export_Plate 1 UNS LN_B9_B09_CD8p_CD8_live.fcs	RTd17_Control_7_UNS	Control	RTd17	seven	Control_seven	UNS	B09
698	Sample_24	2	90	0.12	5.32461	5.25748	2.25371	Sample_24	AI_export_Plate 1 UNS LN_B9_B09_CD8p_CD8_live.fcs	RTd17_Control_7_UNS	Control	RTd17	seven	Control_seven	UNS	B09
699	Sample_24	3	29	0.0386667	4.11726	3.66676	2.26198	Sample_24	AI_export_Plate 1 UNS LN_B9_B09_CD8p_CD8_live.fcs	RTd17_Control_7_UNS	Control	RTd17	seven	Control_seven	UNS	B09
700	Sample_24	4	65	0.0866667	NA	NA	NA	Sample_24	AI_export_Plate 1 UNS LN_B9_B09_CD8p_CD8_live.fcs	RTd17_Control_7_UNS	Control	RTd17	seven	Control_seven	UNS	B09
701	Sample_24	5	145	0.193333	18.3716	18.5362	1.50252	Sample_24	AI_export_Plate 1 UNS LN_B9_B09_CD8p_CD8_live.fcs	RTd17_Control_7_UNS	Control	RTd17	seven	Control_seven	UNS	B09
702	Sample_24	6	13	0.0173333	NA	NA	NA	Sample_24	AI_export_Plate 1 UNS LN_B9_B09_CD8p_CD8_live.fcs	RTd17_Control_7_UNS	Control	RTd17	seven	Control_seven	UNS	B09
703	Sample_24	7	37	0.0493333	19.5483	19.5961	0.159819	Sample_24	AI_export_Plate 1 UNS LN_B9_B09_CD8p_CD8_live.fcs	RTd17_Control_7_UNS	Control	RTd17	seven	Control_seven	UNS	B09
704	Sample_24	8	65	0.0866667	11.2426	11.6798	1.77126	Sample_24	AI_export_Plate 1 UNS LN_B9_B09_CD8p_CD8_live.fcs	RTd17_Control_7_UNS	Control	RTd17	seven	Control_seven	UNS	B09
705	Sample_24	9	34	0.0453333	16.1703	15.8914	1.08683	Sample_24	AI_export_Plate 1 UNS LN_B9_B09_CD8p_CD8_live.fcs	RTd17_Control_7_UNS	Control	RTd17	seven	Control_seven	UNS	B09
706	Sample_25	1	173	0.230667	21.8758	22.4497	2.61249	Sample_25	AI_export_Plate 1 UNS LN_C1_C01_CD8p_CD8_live.fcs	RVm17_aIL10_7_UNS	aIL10	RVm17	seven	aIL10_seven	UNS	C01
707	Sample_25	10	9	0.012	12.9139	14.1051	3.18321	Sample_25	AI_export_Plate 1 UNS LN_C1_C01_CD8p_CD8_live.fcs	RVm17_aIL10_7_UNS	aIL10	RVm17	seven	aIL10_seven	UNS	C01
708	Sample_25	11	55	0.0733333	19.0429	19.5483	1.98838	Sample_25	AI_export_Plate 1 UNS LN_C1_C01_CD8p_CD8_live.fcs	RVm17_aIL10_7_UNS	aIL10	RVm17	seven	aIL10_seven	UNS	C01
709	Sample_25	12	10	0.0133333	8.69198	8.78281	0.407306	Sample_25	AI_export_Plate 1 UNS LN_C1_C01_CD8p_CD8_live.fcs	RVm17_aIL10_7_UNS	aIL10	RVm17	seven	aIL10_seven	UNS	C01
710	Sample_25	13	5	0.00666667	NA	NA	NA	Sample_25	AI_export_Plate 1 UNS LN_C1_C01_CD8p_CD8_live.fcs	RVm17_aIL10_7_UNS	aIL10	RVm17	seven	aIL10_seven	UNS	C01
711	Sample_25	14	0	0	NA	NA	NA	Sample_25	AI_export_Plate 1 UNS LN_C1_C01_CD8p_CD8_live.fcs	RVm17_aIL10_7_UNS	aIL10	RVm17	seven	aIL10_seven	UNS	C01
712	Sample_25	15	3	0.004	9.34254	9.34254	NA	Sample_25	AI_export_Plate 1 UNS LN_C1_C01_CD8p_CD8_live.fcs	RVm17_aIL10_7_UNS	aIL10	RVm17	seven	aIL10_seven	UNS	C01
713	Sample_25	2	139	0.185333	5.2185	5.37609	2.42912	Sample_25	AI_export_Plate 1 UNS LN_C1_C01_CD8p_CD8_live.fcs	RVm17_aIL10_7_UNS	aIL10	RVm17	seven	aIL10_seven	UNS	C01
714	Sample_25	3	113	0.150667	3.98259	3.61922	3.09411	Sample_25	AI_export_Plate 1 UNS LN_C1_C01_CD8p_CD8_live.fcs	RVm17_aIL10_7_UNS	aIL10	RVm17	seven	aIL10_seven	UNS	C01
715	Sample_25	4	38	0.0506667	NA	NA	NA	Sample_25	AI_export_Plate 1 UNS LN_C1_C01_CD8p_CD8_live.fcs	RVm17_aIL10_7_UNS	aIL10	RVm17	seven	aIL10_seven	UNS	C01
716	Sample_25	5	91	0.121333	18.5792	18.8327	1.71317	Sample_25	AI_export_Plate 1 UNS LN_C1_C01_CD8p_CD8_live.fcs	RVm17_aIL10_7_UNS	aIL10	RVm17	seven	aIL10_seven	UNS	C01
717	Sample_25	6	31	0.0413333	NA	NA	NA	Sample_25	AI_export_Plate 1 UNS LN_C1_C01_CD8p_CD8_live.fcs	RVm17_aIL10_7_UNS	aIL10	RVm17	seven	aIL10_seven	UNS	C01
718	Sample_25	7	35	0.0466667	19.5752	19.5961	0.0593875	Sample_25	AI_export_Plate 1 UNS LN_C1_C01_CD8p_CD8_live.fcs	RVm17_aIL10_7_UNS	aIL10	RVm17	seven	aIL10_seven	UNS	C01
719	Sample_25	8	37	0.0493333	11.6561	11.9223	1.53009	Sample_25	AI_export_Plate 1 UNS LN_C1_C01_CD8p_CD8_live.fcs	RVm17_aIL10_7_UNS	aIL10	RVm17	seven	aIL10_seven	UNS	C01
720	Sample_25	9	11	0.0146667	16.48	15.8914	1.08961	Sample_25	AI_export_Plate 1 UNS LN_C1_C01_CD8p_CD8_live.fcs	RVm17_aIL10_7_UNS	aIL10	RVm17	seven	aIL10_seven	UNS	C01
721	Sample_26	1	117	0.156	21.6117	21.7313	2.7358	Sample_26	AI_export_Plate 1 UNS LN_C10_C10_CD8p_CD8_live.fcs	RNy16_aIL10+aPD1_12_UNS	aIL10+aPD1	RNy16	twelve	aIL10+aPD1_twelve	UNS	C10
722	Sample_26	10	24	0.032	15.4651	15.7355	2.90412	Sample_26	AI_export_Plate 1 UNS LN_C10_C10_CD8p_CD8_live.fcs	RNy16_aIL10+aPD1_12_UNS	aIL10+aPD1	RNy16	twelve	aIL10+aPD1_twelve	UNS	C10
723	Sample_26	11	26	0.0346667	18.187	19.5483	4.10388	Sample_26	AI_export_Plate 1 UNS LN_C10_C10_CD8p_CD8_live.fcs	RNy16_aIL10+aPD1_12_UNS	aIL10+aPD1	RNy16	twelve	aIL10+aPD1_twelve	UNS	C10
724	Sample_26	12	6	0.008	8.4301	8.26002	0.666493	Sample_26	AI_export_Plate 1 UNS LN_C10_C10_CD8p_CD8_live.fcs	RNy16_aIL10+aPD1_12_UNS	aIL10+aPD1	RNy16	twelve	aIL10+aPD1_twelve	UNS	C10
725	Sample_26	13	22	0.0293333	NA	NA	NA	Sample_26	AI_export_Plate 1 UNS LN_C10_C10_CD8p_CD8_live.fcs	RNy16_aIL10+aPD1_12_UNS	aIL10+aPD1	RNy16	twelve	aIL10+aPD1_twelve	UNS	C10
726	Sample_26	14	0	0	NA	NA	NA	Sample_26	AI_export_Plate 1 UNS LN_C10_C10_CD8p_CD8_live.fcs	RNy16_aIL10+aPD1_12_UNS	aIL10+aPD1	RNy16	twelve	aIL10+aPD1_twelve	UNS	C10
727	Sample_26	15	0	0	NA	NA	NA	Sample_26	AI_export_Plate 1 UNS LN_C10_C10_CD8p_CD8_live.fcs	RNy16_aIL10+aPD1_12_UNS	aIL10+aPD1	RNy16	twelve	aIL10+aPD1_twelve	UNS	C10
728	Sample_26	2	149	0.198667	4.16477	3.96926	2.31184	Sample_26	AI_export_Plate 1 UNS LN_C10_C10_CD8p_CD8_live.fcs	RNy16_aIL10+aPD1_12_UNS	aIL10+aPD1	RNy16	twelve	aIL10+aPD1_twelve	UNS	C10
729	Sample_26	3	96	0.128	3.66214	3.53941	1.7458	Sample_26	AI_export_Plate 1 UNS LN_C10_C10_CD8p_CD8_live.fcs	RNy16_aIL10+aPD1_12_UNS	aIL10+aPD1	RNy16	twelve	aIL10+aPD1_twelve	UNS	C10
730	Sample_26	4	93	0.124	NA	NA	NA	Sample_26	AI_export_Plate 1 UNS LN_C10_C10_CD8p_CD8_live.fcs	RNy16_aIL10+aPD1_12_UNS	aIL10+aPD1	RNy16	twelve	aIL10+aPD1_twelve	UNS	C10
731	Sample_26	5	90	0.12	18.6236	18.9567	2.29382	Sample_26	AI_export_Plate 1 UNS LN_C10_C10_CD8p_CD8_live.fcs	RNy16_aIL10+aPD1_12_UNS	aIL10+aPD1	RNy16	twelve	aIL10+aPD1_twelve	UNS	C10
732	Sample_26	6	23	0.0306667	NA	NA	NA	Sample_26	AI_export_Plate 1 UNS LN_C10_C10_CD8p_CD8_live.fcs	RNy16_aIL10+aPD1_12_UNS	aIL10+aPD1	RNy16	twelve	aIL10+aPD1_twelve	UNS	C10
733	Sample_26	7	17	0.0226667	19.4989	19.5961	0.213795	Sample_26	AI_export_Plate 1 UNS LN_C10_C10_CD8p_CD8_live.fcs	RNy16_aIL10+aPD1_12_UNS	aIL10+aPD1	RNy16	twelve	aIL10+aPD1_twelve	UNS	C10
734	Sample_26	8	49	0.0653333	11.6879	11.7595	1.80573	Sample_26	AI_export_Plate 1 UNS LN_C10_C10_CD8p_CD8_live.fcs	RNy16_aIL10+aPD1_12_UNS	aIL10+aPD1	RNy16	twelve	aIL10+aPD1_twelve	UNS	C10
735	Sample_26	9	38	0.0506667	16.068	15.8914	1.07981	Sample_26	AI_export_Plate 1 UNS LN_C10_C10_CD8p_CD8_live.fcs	RNy16_aIL10+aPD1_12_UNS	aIL10+aPD1	RNy16	twelve	aIL10+aPD1_twelve	UNS	C10
736	Sample_27	1	115	0.153333	21.3077	21.4203	3.0872	Sample_27	AI_export_Plate 1 UNS LN_C11_C11_CD8p_CD8_live.fcs	RTd17_Control_12_UNS	Control	RTd17	twelve	Control_twelve	UNS	C11
737	Sample_27	10	14	0.0186667	15.3479	15.5188	2.47822	Sample_27	AI_export_Plate 1 UNS LN_C11_C11_CD8p_CD8_live.fcs	RTd17_Control_12_UNS	Control	RTd17	twelve	Control_twelve	UNS	C11
738	Sample_27	11	30	0.04	17.0143	19.5316	5.43663	Sample_27	AI_export_Plate 1 UNS LN_C11_C11_CD8p_CD8_live.fcs	RTd17_Control_12_UNS	Control	RTd17	twelve	Control_twelve	UNS	C11
739	Sample_27	12	24	0.032	8.60174	8.42823	1.28672	Sample_27	AI_export_Plate 1 UNS LN_C11_C11_CD8p_CD8_live.fcs	RTd17_Control_12_UNS	Control	RTd17	twelve	Control_twelve	UNS	C11
740	Sample_27	13	12	0.016	12.2376	12.2376	NA	Sample_27	AI_export_Plate 1 UNS LN_C11_C11_CD8p_CD8_live.fcs	RTd17_Control_12_UNS	Control	RTd17	twelve	Control_twelve	UNS	C11
741	Sample_27	14	0	0	NA	NA	NA	Sample_27	AI_export_Plate 1 UNS LN_C11_C11_CD8p_CD8_live.fcs	RTd17_Control_12_UNS	Control	RTd17	twelve	Control_twelve	UNS	C11
742	Sample_27	15	0	0	NA	NA	NA	Sample_27	AI_export_Plate 1 UNS LN_C11_C11_CD8p_CD8_live.fcs	RTd17_Control_12_UNS	Control	RTd17	twelve	Control_twelve	UNS	C11
743	Sample_27	2	149	0.198667	4.66757	4.52145	2.68342	Sample_27	AI_export_Plate 1 UNS LN_C11_C11_CD8p_CD8_live.fcs	RTd17_Control_12_UNS	Control	RTd17	twelve	Control_twelve	UNS	C11
744	Sample_27	3	98	0.130667	3.84111	3.66676	1.68529	Sample_27	AI_export_Plate 1 UNS LN_C11_C11_CD8p_CD8_live.fcs	RTd17_Control_12_UNS	Control	RTd17	twelve	Control_twelve	UNS	C11
745	Sample_27	4	73	0.0973333	20.4222	20.4222	NA	Sample_27	AI_export_Plate 1 UNS LN_C11_C11_CD8p_CD8_live.fcs	RTd17_Control_12_UNS	Control	RTd17	twelve	Control_twelve	UNS	C11
746	Sample_27	5	110	0.146667	18.888	18.8402	1.22202	Sample_27	AI_export_Plate 1 UNS LN_C11_C11_CD8p_CD8_live.fcs	RTd17_Control_12_UNS	Control	RTd17	twelve	Control_twelve	UNS	C11
747	Sample_27	6	27	0.036	18.7467	18.7467	NA	Sample_27	AI_export_Plate 1 UNS LN_C11_C11_CD8p_CD8_live.fcs	RTd17_Control_12_UNS	Control	RTd17	twelve	Control_twelve	UNS	C11
748	Sample_27	7	14	0.0186667	19.4449	19.5961	0.311522	Sample_27	AI_export_Plate 1 UNS LN_C11_C11_CD8p_CD8_live.fcs	RTd17_Control_12_UNS	Control	RTd17	twelve	Control_twelve	UNS	C11
749	Sample_27	8	43	0.0573333	11.0965	11.4016	1.94805	Sample_27	AI_export_Plate 1 UNS LN_C11_C11_CD8p_CD8_live.fcs	RTd17_Control_12_UNS	Control	RTd17	twelve	Control_twelve	UNS	C11
750	Sample_27	9	41	0.0546667	15.8098	15.8914	0.782293	Sample_27	AI_export_Plate 1 UNS LN_C11_C11_CD8p_CD8_live.fcs	RTd17_Control_12_UNS	Control	RTd17	twelve	Control_twelve	UNS	C11
751	Sample_28	1	101	0.134667	21.0333	22.0005	3.73539	Sample_28	AI_export_Plate 1 UNS LN_C12_C12_CD8p_CD8_live.fcs	34897_aIL10_12_UNS	aIL10	34897	twelve	aIL10_twelve	UNS	C12
752	Sample_28	10	11	0.0146667	13.0506	12.4043	3.59638	Sample_28	AI_export_Plate 1 UNS LN_C12_C12_CD8p_CD8_live.fcs	34897_aIL10_12_UNS	aIL10	34897	twelve	aIL10_twelve	UNS	C12
753	Sample_28	11	20	0.0266667	18.6016	19.5483	3.51793	Sample_28	AI_export_Plate 1 UNS LN_C12_C12_CD8p_CD8_live.fcs	34897_aIL10_12_UNS	aIL10	34897	twelve	aIL10_twelve	UNS	C12
754	Sample_28	12	18	0.024	8.34355	8.40946	0.496901	Sample_28	AI_export_Plate 1 UNS LN_C12_C12_CD8p_CD8_live.fcs	34897_aIL10_12_UNS	aIL10	34897	twelve	aIL10_twelve	UNS	C12
755	Sample_28	13	4	0.00533333	NA	NA	NA	Sample_28	AI_export_Plate 1 UNS LN_C12_C12_CD8p_CD8_live.fcs	34897_aIL10_12_UNS	aIL10	34897	twelve	aIL10_twelve	UNS	C12
756	Sample_28	14	1	0.00133333	0.56396	0.56396	NA	Sample_28	AI_export_Plate 1 UNS LN_C12_C12_CD8p_CD8_live.fcs	34897_aIL10_12_UNS	aIL10	34897	twelve	aIL10_twelve	UNS	C12
757	Sample_28	15	0	0	NA	NA	NA	Sample_28	AI_export_Plate 1 UNS LN_C12_C12_CD8p_CD8_live.fcs	34897_aIL10_12_UNS	aIL10	34897	twelve	aIL10_twelve	UNS	C12
758	Sample_28	2	259	0.345333	4.24837	4.2049	2.42824	Sample_28	AI_export_Plate 1 UNS LN_C12_C12_CD8p_CD8_live.fcs	34897_aIL10_12_UNS	aIL10	34897	twelve	aIL10_twelve	UNS	C12
759	Sample_28	3	148	0.197333	3.78965	3.54076	2.25795	Sample_28	AI_export_Plate 1 UNS LN_C12_C12_CD8p_CD8_live.fcs	34897_aIL10_12_UNS	aIL10	34897	twelve	aIL10_twelve	UNS	C12
760	Sample_28	4	27	0.036	NA	NA	NA	Sample_28	AI_export_Plate 1 UNS LN_C12_C12_CD8p_CD8_live.fcs	34897_aIL10_12_UNS	aIL10	34897	twelve	aIL10_twelve	UNS	C12
761	Sample_28	5	69	0.092	18.8666	18.9397	1.0121	Sample_28	AI_export_Plate 1 UNS LN_C12_C12_CD8p_CD8_live.fcs	34897_aIL10_12_UNS	aIL10	34897	twelve	aIL10_twelve	UNS	C12
762	Sample_28	6	9	0.012	NA	NA	NA	Sample_28	AI_export_Plate 1 UNS LN_C12_C12_CD8p_CD8_live.fcs	34897_aIL10_12_UNS	aIL10	34897	twelve	aIL10_twelve	UNS	C12
763	Sample_28	7	12	0.016	19.5349	19.5961	0.156993	Sample_28	AI_export_Plate 1 UNS LN_C12_C12_CD8p_CD8_live.fcs	34897_aIL10_12_UNS	aIL10	34897	twelve	aIL10_twelve	UNS	C12
764	Sample_28	8	37	0.0493333	11.2431	11.7246	1.50188	Sample_28	AI_export_Plate 1 UNS LN_C12_C12_CD8p_CD8_live.fcs	34897_aIL10_12_UNS	aIL10	34897	twelve	aIL10_twelve	UNS	C12
765	Sample_28	9	34	0.0453333	16.5599	15.9204	1.84415	Sample_28	AI_export_Plate 1 UNS LN_C12_C12_CD8p_CD8_live.fcs	34897_aIL10_12_UNS	aIL10	34897	twelve	aIL10_twelve	UNS	C12
766	Sample_29	1	111	0.148	22.0158	22.3567	2.37297	Sample_29	AI_export_Plate 1 UNS LN_C2_C02_CD8p_CD8_live.fcs	RBe17_Control_7_UNS	Control	RBe17	seven	Control_seven	UNS	C02
767	Sample_29	10	12	0.016	14.1589	15.5469	3.51889	Sample_29	AI_export_Plate 1 UNS LN_C2_C02_CD8p_CD8_live.fcs	RBe17_Control_7_UNS	Control	RBe17	seven	Control_seven	UNS	C02
768	Sample_29	11	46	0.0613333	19.3461	19.5483	1.12591	Sample_29	AI_export_Plate 1 UNS LN_C2_C02_CD8p_CD8_live.fcs	RBe17_Control_7_UNS	Control	RBe17	seven	Control_seven	UNS	C02
769	Sample_29	12	7	0.00933333	9.19782	8.49061	1.82888	Sample_29	AI_export_Plate 1 UNS LN_C2_C02_CD8p_CD8_live.fcs	RBe17_Control_7_UNS	Control	RBe17	seven	Control_seven	UNS	C02
770	Sample_29	13	6	0.008	17.9046	17.9046	0.0118277	Sample_29	AI_export_Plate 1 UNS LN_C2_C02_CD8p_CD8_live.fcs	RBe17_Control_7_UNS	Control	RBe17	seven	Control_seven	UNS	C02
771	Sample_29	14	0	0	NA	NA	NA	Sample_29	AI_export_Plate 1 UNS LN_C2_C02_CD8p_CD8_live.fcs	RBe17_Control_7_UNS	Control	RBe17	seven	Control_seven	UNS	C02
772	Sample_29	15	1	0.00133333	19.2006	19.2006	NA	Sample_29	AI_export_Plate 1 UNS LN_C2_C02_CD8p_CD8_live.fcs	RBe17_Control_7_UNS	Control	RBe17	seven	Control_seven	UNS	C02
773	Sample_29	2	155	0.206667	4.67026	4.63774	2.99486	Sample_29	AI_export_Plate 1 UNS LN_C2_C02_CD8p_CD8_live.fcs	RBe17_Control_7_UNS	Control	RBe17	seven	Control_seven	UNS	C02
774	Sample_29	3	93	0.124	3.86546	3.49109	3.23736	Sample_29	AI_export_Plate 1 UNS LN_C2_C02_CD8p_CD8_live.fcs	RBe17_Control_7_UNS	Control	RBe17	seven	Control_seven	UNS	C02
775	Sample_29	4	87	0.116	20.5145	20.5145	NA	Sample_29	AI_export_Plate 1 UNS LN_C2_C02_CD8p_CD8_live.fcs	RBe17_Control_7_UNS	Control	RBe17	seven	Control_seven	UNS	C02
776	Sample_29	5	125	0.166667	18.531	18.8269	1.85866	Sample_29	AI_export_Plate 1 UNS LN_C2_C02_CD8p_CD8_live.fcs	RBe17_Control_7_UNS	Control	RBe17	seven	Control_seven	UNS	C02
777	Sample_29	6	13	0.0173333	NA	NA	NA	Sample_29	AI_export_Plate 1 UNS LN_C2_C02_CD8p_CD8_live.fcs	RBe17_Control_7_UNS	Control	RBe17	seven	Control_seven	UNS	C02
778	Sample_29	7	12	0.016	19.5246	19.5961	0.187529	Sample_29	AI_export_Plate 1 UNS LN_C2_C02_CD8p_CD8_live.fcs	RBe17_Control_7_UNS	Control	RBe17	seven	Control_seven	UNS	C02
779	Sample_29	8	38	0.0506667	12.5932	11.9085	3.23609	Sample_29	AI_export_Plate 1 UNS LN_C2_C02_CD8p_CD8_live.fcs	RBe17_Control_7_UNS	Control	RBe17	seven	Control_seven	UNS	C02
780	Sample_29	9	44	0.0586667	16.0823	15.8914	1.13071	Sample_29	AI_export_Plate 1 UNS LN_C2_C02_CD8p_CD8_live.fcs	RBe17_Control_7_UNS	Control	RBe17	seven	Control_seven	UNS	C02
781	Sample_3	1	156	0.208	21.7537	22.4315	3.14426	Sample_3	AI_export_Plate 1 UNS LN_A11_A11_CD8p_CD8_live.fcs	RVm17_aIL10_-1_UNS	aIL10	RVm17	minus_one	aIL10_minus_one	UNS	A11
782	Sample_3	10	15	0.02	14.8498	15.7355	2.93627	Sample_3	AI_export_Plate 1 UNS LN_A11_A11_CD8p_CD8_live.fcs	RVm17_aIL10_-1_UNS	aIL10	RVm17	minus_one	aIL10_minus_one	UNS	A11
783	Sample_3	11	50	0.0666667	19.1787	19.5483	0.840523	Sample_3	AI_export_Plate 1 UNS LN_A11_A11_CD8p_CD8_live.fcs	RVm17_aIL10_-1_UNS	aIL10	RVm17	minus_one	aIL10_minus_one	UNS	A11
784	Sample_3	12	13	0.0173333	11.0158	9.03068	4.64744	Sample_3	AI_export_Plate 1 UNS LN_A11_A11_CD8p_CD8_live.fcs	RVm17_aIL10_-1_UNS	aIL10	RVm17	minus_one	aIL10_minus_one	UNS	A11
785	Sample_3	13	6	0.008	NA	NA	NA	Sample_3	AI_export_Plate 1 UNS LN_A11_A11_CD8p_CD8_live.fcs	RVm17_aIL10_-1_UNS	aIL10	RVm17	minus_one	aIL10_minus_one	UNS	A11
786	Sample_3	14	0	0	NA	NA	NA	Sample_3	AI_export_Plate 1 UNS LN_A11_A11_CD8p_CD8_live.fcs	RVm17_aIL10_-1_UNS	aIL10	RVm17	minus_one	aIL10_minus_one	UNS	A11
787	Sample_3	15	1	0.00133333	9.04525	9.04525	NA	Sample_3	AI_export_Plate 1 UNS LN_A11_A11_CD8p_CD8_live.fcs	RVm17_aIL10_-1_UNS	aIL10	RVm17	minus_one	aIL10_minus_one	UNS	A11
788	Sample_3	2	106	0.141333	5.08567	5.12643	2.80021	Sample_3	AI_export_Plate 1 UNS LN_A11_A11_CD8p_CD8_live.fcs	RVm17_aIL10_-1_UNS	aIL10	RVm17	minus_one	aIL10_minus_one	UNS	A11
789	Sample_3	3	68	0.0906667	3.89913	3.66676	2.1178	Sample_3	AI_export_Plate 1 UNS LN_A11_A11_CD8p_CD8_live.fcs	RVm17_aIL10_-1_UNS	aIL10	RVm17	minus_one	aIL10_minus_one	UNS	A11
790	Sample_3	4	84	0.112	0.56396	0.56396	NA	Sample_3	AI_export_Plate 1 UNS LN_A11_A11_CD8p_CD8_live.fcs	RVm17_aIL10_-1_UNS	aIL10	RVm17	minus_one	aIL10_minus_one	UNS	A11
791	Sample_3	5	108	0.144	18.3541	18.8449	2.05675	Sample_3	AI_export_Plate 1 UNS LN_A11_A11_CD8p_CD8_live.fcs	RVm17_aIL10_-1_UNS	aIL10	RVm17	minus_one	aIL10_minus_one	UNS	A11
792	Sample_3	6	37	0.0493333	NA	NA	NA	Sample_3	AI_export_Plate 1 UNS LN_A11_A11_CD8p_CD8_live.fcs	RVm17_aIL10_-1_UNS	aIL10	RVm17	minus_one	aIL10_minus_one	UNS	A11
793	Sample_3	7	25	0.0333333	19.56	19.5961	0.106314	Sample_3	AI_export_Plate 1 UNS LN_A11_A11_CD8p_CD8_live.fcs	RVm17_aIL10_-1_UNS	aIL10	RVm17	minus_one	aIL10_minus_one	UNS	A11
794	Sample_3	8	28	0.0373333	12.0699	11.9233	0.76922	Sample_3	AI_export_Plate 1 UNS LN_A11_A11_CD8p_CD8_live.fcs	RVm17_aIL10_-1_UNS	aIL10	RVm17	minus_one	aIL10_minus_one	UNS	A11
795	Sample_3	9	53	0.0706667	16.0399	15.8914	1.65429	Sample_3	AI_export_Plate 1 UNS LN_A11_A11_CD8p_CD8_live.fcs	RVm17_aIL10_-1_UNS	aIL10	RVm17	minus_one	aIL10_minus_one	UNS	A11
796	Sample_30	1	143	0.190667	21.6011	21.7313	2.68192	Sample_30	AI_export_Plate 1 UNS LN_C3_C03_CD8p_CD8_live.fcs	RMl17_Control_7_UNS	Control	RMl17	seven	Control_seven	UNS	C03
797	Sample_30	10	12	0.016	14.2569	14.9219	3.40884	Sample_30	AI_export_Plate 1 UNS LN_C3_C03_CD8p_CD8_live.fcs	RMl17_Control_7_UNS	Control	RMl17	seven	Control_seven	UNS	C03
798	Sample_30	11	62	0.0826667	18.9396	19.5483	2.97638	Sample_30	AI_export_Plate 1 UNS LN_C3_C03_CD8p_CD8_live.fcs	RMl17_Control_7_UNS	Control	RMl17	seven	Control_seven	UNS	C03
799	Sample_30	12	10	0.0133333	9.30033	8.55649	2.11566	Sample_30	AI_export_Plate 1 UNS LN_C3_C03_CD8p_CD8_live.fcs	RMl17_Control_7_UNS	Control	RMl17	seven	Control_seven	UNS	C03
800	Sample_30	13	6	0.008	NA	NA	NA	Sample_30	AI_export_Plate 1 UNS LN_C3_C03_CD8p_CD8_live.fcs	RMl17_Control_7_UNS	Control	RMl17	seven	Control_seven	UNS	C03
801	Sample_30	14	0	0	NA	NA	NA	Sample_30	AI_export_Plate 1 UNS LN_C3_C03_CD8p_CD8_live.fcs	RMl17_Control_7_UNS	Control	RMl17	seven	Control_seven	UNS	C03
802	Sample_30	15	0	0	NA	NA	NA	Sample_30	AI_export_Plate 1 UNS LN_C3_C03_CD8p_CD8_live.fcs	RMl17_Control_7_UNS	Control	RMl17	seven	Control_seven	UNS	C03
803	Sample_30	2	170	0.226667	4.92267	4.71621	3.613	Sample_30	AI_export_Plate 1 UNS LN_C3_C03_CD8p_CD8_live.fcs	RMl17_Control_7_UNS	Control	RMl17	seven	Control_seven	UNS	C03
804	Sample_30	3	95	0.126667	3.98707	3.66676	1.99071	Sample_30	AI_export_Plate 1 UNS LN_C3_C03_CD8p_CD8_live.fcs	RMl17_Control_7_UNS	Control	RMl17	seven	Control_seven	UNS	C03
805	Sample_30	4	37	0.0493333	15.1635	15.1635	NA	Sample_30	AI_export_Plate 1 UNS LN_C3_C03_CD8p_CD8_live.fcs	RMl17_Control_7_UNS	Control	RMl17	seven	Control_seven	UNS	C03
806	Sample_30	5	105	0.14	18.1076	18.5225	2.20777	Sample_30	AI_export_Plate 1 UNS LN_C3_C03_CD8p_CD8_live.fcs	RMl17_Control_7_UNS	Control	RMl17	seven	Control_seven	UNS	C03
807	Sample_30	6	15	0.02	NA	NA	NA	Sample_30	AI_export_Plate 1 UNS LN_C3_C03_CD8p_CD8_live.fcs	RMl17_Control_7_UNS	Control	RMl17	seven	Control_seven	UNS	C03
808	Sample_30	7	24	0.032	19.2801	19.5961	1.29993	Sample_30	AI_export_Plate 1 UNS LN_C3_C03_CD8p_CD8_live.fcs	RMl17_Control_7_UNS	Control	RMl17	seven	Control_seven	UNS	C03
809	Sample_30	8	44	0.0586667	11.8599	11.895	1.35383	Sample_30	AI_export_Plate 1 UNS LN_C3_C03_CD8p_CD8_live.fcs	RMl17_Control_7_UNS	Control	RMl17	seven	Control_seven	UNS	C03
810	Sample_30	9	27	0.036	15.9835	15.929	0.873799	Sample_30	AI_export_Plate 1 UNS LN_C3_C03_CD8p_CD8_live.fcs	RMl17_Control_7_UNS	Control	RMl17	seven	Control_seven	UNS	C03
811	Sample_31	1	153	0.204	21.8422	22.375	2.43772	Sample_31	AI_export_Plate 1 UNS LN_C4_C04_CD8p_CD8_live.fcs	RIb17_aIL10+aPD1_7_UNS	aIL10+aPD1	RIb17	seven	aIL10+aPD1_seven	UNS	C04
812	Sample_31	10	14	0.0186667	13.882	14.1882	2.7922	Sample_31	AI_export_Plate 1 UNS LN_C4_C04_CD8p_CD8_live.fcs	RIb17_aIL10+aPD1_7_UNS	aIL10+aPD1	RIb17	seven	aIL10+aPD1_seven	UNS	C04
813	Sample_31	11	27	0.036	18.8853	19.5483	3.44016	Sample_31	AI_export_Plate 1 UNS LN_C4_C04_CD8p_CD8_live.fcs	RIb17_aIL10+aPD1_7_UNS	aIL10+aPD1	RIb17	seven	aIL10+aPD1_seven	UNS	C04
814	Sample_31	12	24	0.032	8.58819	8.73906	0.672889	Sample_31	AI_export_Plate 1 UNS LN_C4_C04_CD8p_CD8_live.fcs	RIb17_aIL10+aPD1_7_UNS	aIL10+aPD1	RIb17	seven	aIL10+aPD1_seven	UNS	C04
815	Sample_31	13	4	0.00533333	NA	NA	NA	Sample_31	AI_export_Plate 1 UNS LN_C4_C04_CD8p_CD8_live.fcs	RIb17_aIL10+aPD1_7_UNS	aIL10+aPD1	RIb17	seven	aIL10+aPD1_seven	UNS	C04
816	Sample_31	14	0	0	NA	NA	NA	Sample_31	AI_export_Plate 1 UNS LN_C4_C04_CD8p_CD8_live.fcs	RIb17_aIL10+aPD1_7_UNS	aIL10+aPD1	RIb17	seven	aIL10+aPD1_seven	UNS	C04
817	Sample_31	15	3	0.004	NA	NA	NA	Sample_31	AI_export_Plate 1 UNS LN_C4_C04_CD8p_CD8_live.fcs	RIb17_aIL10+aPD1_7_UNS	aIL10+aPD1	RIb17	seven	aIL10+aPD1_seven	UNS	C04
818	Sample_31	2	200	0.266667	4.71438	4.71621	2.15504	Sample_31	AI_export_Plate 1 UNS LN_C4_C04_CD8p_CD8_live.fcs	RIb17_aIL10+aPD1_7_UNS	aIL10+aPD1	RIb17	seven	aIL10+aPD1_seven	UNS	C04
819	Sample_31	3	88	0.117333	4.17845	3.66676	2.96045	Sample_31	AI_export_Plate 1 UNS LN_C4_C04_CD8p_CD8_live.fcs	RIb17_aIL10+aPD1_7_UNS	aIL10+aPD1	RIb17	seven	aIL10+aPD1_seven	UNS	C04
820	Sample_31	4	50	0.0666667	NA	NA	NA	Sample_31	AI_export_Plate 1 UNS LN_C4_C04_CD8p_CD8_live.fcs	RIb17_aIL10+aPD1_7_UNS	aIL10+aPD1	RIb17	seven	aIL10+aPD1_seven	UNS	C04
821	Sample_31	5	94	0.125333	18.4615	18.96	2.28093	Sample_31	AI_export_Plate 1 UNS LN_C4_C04_CD8p_CD8_live.fcs	RIb17_aIL10+aPD1_7_UNS	aIL10+aPD1	RIb17	seven	aIL10+aPD1_seven	UNS	C04
822	Sample_31	6	18	0.024	NA	NA	NA	Sample_31	AI_export_Plate 1 UNS LN_C4_C04_CD8p_CD8_live.fcs	RIb17_aIL10+aPD1_7_UNS	aIL10+aPD1	RIb17	seven	aIL10+aPD1_seven	UNS	C04
823	Sample_31	7	7	0.00933333	19.4886	19.5961	0.20784	Sample_31	AI_export_Plate 1 UNS LN_C4_C04_CD8p_CD8_live.fcs	RIb17_aIL10+aPD1_7_UNS	aIL10+aPD1	RIb17	seven	aIL10+aPD1_seven	UNS	C04
824	Sample_31	8	43	0.0573333	12.4219	11.7791	3.23091	Sample_31	AI_export_Plate 1 UNS LN_C4_C04_CD8p_CD8_live.fcs	RIb17_aIL10+aPD1_7_UNS	aIL10+aPD1	RIb17	seven	aIL10+aPD1_seven	UNS	C04
825	Sample_31	9	25	0.0333333	15.9099	15.8914	1.14582	Sample_31	AI_export_Plate 1 UNS LN_C4_C04_CD8p_CD8_live.fcs	RIb17_aIL10+aPD1_7_UNS	aIL10+aPD1	RIb17	seven	aIL10+aPD1_seven	UNS	C04
826	Sample_32	1	106	0.141333	21.577	22.1597	3.239	Sample_32	AI_export_Plate 1 UNS LN_C5_C05_CD8p_CD8_live.fcs	RFl17_aIL10+aPD1_12_UNS	aIL10+aPD1	RFl17	twelve	aIL10+aPD1_twelve	UNS	C05
827	Sample_32	10	13	0.0173333	15.0553	15.7355	2.93573	Sample_32	AI_export_Plate 1 UNS LN_C5_C05_CD8p_CD8_live.fcs	RFl17_aIL10+aPD1_12_UNS	aIL10+aPD1	RFl17	twelve	aIL10+aPD1_twelve	UNS	C05
828	Sample_32	11	27	0.036	19.4388	19.5483	1.25544	Sample_32	AI_export_Plate 1 UNS LN_C5_C05_CD8p_CD8_live.fcs	RFl17_aIL10+aPD1_12_UNS	aIL10+aPD1	RFl17	twelve	aIL10+aPD1_twelve	UNS	C05
829	Sample_32	12	10	0.0133333	10.8347	9.063	5.11547	Sample_32	AI_export_Plate 1 UNS LN_C5_C05_CD8p_CD8_live.fcs	RFl17_aIL10+aPD1_12_UNS	aIL10+aPD1	RFl17	twelve	aIL10+aPD1_twelve	UNS	C05
830	Sample_32	13	6	0.008	NA	NA	NA	Sample_32	AI_export_Plate 1 UNS LN_C5_C05_CD8p_CD8_live.fcs	RFl17_aIL10+aPD1_12_UNS	aIL10+aPD1	RFl17	twelve	aIL10+aPD1_twelve	UNS	C05
831	Sample_32	14	2	0.00266667	0.56396	0.56396	NA	Sample_32	AI_export_Plate 1 UNS LN_C5_C05_CD8p_CD8_live.fcs	RFl17_aIL10+aPD1_12_UNS	aIL10+aPD1	RFl17	twelve	aIL10+aPD1_twelve	UNS	C05
832	Sample_32	15	0	0	NA	NA	NA	Sample_32	AI_export_Plate 1 UNS LN_C5_C05_CD8p_CD8_live.fcs	RFl17_aIL10+aPD1_12_UNS	aIL10+aPD1	RFl17	twelve	aIL10+aPD1_twelve	UNS	C05
833	Sample_32	2	190	0.253333	4.16621	4.32934	2.45474	Sample_32	AI_export_Plate 1 UNS LN_C5_C05_CD8p_CD8_live.fcs	RFl17_aIL10+aPD1_12_UNS	aIL10+aPD1	RFl17	twelve	aIL10+aPD1_twelve	UNS	C05
834	Sample_32	3	128	0.170667	4.19311	3.48259	3.89391	Sample_32	AI_export_Plate 1 UNS LN_C5_C05_CD8p_CD8_live.fcs	RFl17_aIL10+aPD1_12_UNS	aIL10+aPD1	RFl17	twelve	aIL10+aPD1_twelve	UNS	C05
835	Sample_32	4	76	0.101333	NA	NA	NA	Sample_32	AI_export_Plate 1 UNS LN_C5_C05_CD8p_CD8_live.fcs	RFl17_aIL10+aPD1_12_UNS	aIL10+aPD1	RFl17	twelve	aIL10+aPD1_twelve	UNS	C05
836	Sample_32	5	85	0.113333	18.232	18.8427	2.58564	Sample_32	AI_export_Plate 1 UNS LN_C5_C05_CD8p_CD8_live.fcs	RFl17_aIL10+aPD1_12_UNS	aIL10+aPD1	RFl17	twelve	aIL10+aPD1_twelve	UNS	C05
837	Sample_32	6	27	0.036	NA	NA	NA	Sample_32	AI_export_Plate 1 UNS LN_C5_C05_CD8p_CD8_live.fcs	RFl17_aIL10+aPD1_12_UNS	aIL10+aPD1	RFl17	twelve	aIL10+aPD1_twelve	UNS	C05
838	Sample_32	7	17	0.0226667	19.2679	19.5961	1.02762	Sample_32	AI_export_Plate 1 UNS LN_C5_C05_CD8p_CD8_live.fcs	RFl17_aIL10+aPD1_12_UNS	aIL10+aPD1	RFl17	twelve	aIL10+aPD1_twelve	UNS	C05
839	Sample_32	8	38	0.0506667	11.6506	11.7791	1.4182	Sample_32	AI_export_Plate 1 UNS LN_C5_C05_CD8p_CD8_live.fcs	RFl17_aIL10+aPD1_12_UNS	aIL10+aPD1	RFl17	twelve	aIL10+aPD1_twelve	UNS	C05
840	Sample_32	9	25	0.0333333	16.1884	15.923	0.751963	Sample_32	AI_export_Plate 1 UNS LN_C5_C05_CD8p_CD8_live.fcs	RFl17_aIL10+aPD1_12_UNS	aIL10+aPD1	RFl17	twelve	aIL10+aPD1_twelve	UNS	C05
841	Sample_33	1	81	0.108	21.9822	22.2917	2.8565	Sample_33	AI_export_Plate 1 UNS LN_C6_C06_CD8p_CD8_live.fcs	RYk17_aIL10_12_UNS	aIL10	RYk17	twelve	aIL10_twelve	UNS	C06
842	Sample_33	10	18	0.024	15.0196	15.7246	2.30289	Sample_33	AI_export_Plate 1 UNS LN_C6_C06_CD8p_CD8_live.fcs	RYk17_aIL10_12_UNS	aIL10	RYk17	twelve	aIL10_twelve	UNS	C06
843	Sample_33	11	26	0.0346667	19.007	19.5483	1.34157	Sample_33	AI_export_Plate 1 UNS LN_C6_C06_CD8p_CD8_live.fcs	RYk17_aIL10_12_UNS	aIL10	RYk17	twelve	aIL10_twelve	UNS	C06
844	Sample_33	12	12	0.016	8.30124	8.77066	1.31822	Sample_33	AI_export_Plate 1 UNS LN_C6_C06_CD8p_CD8_live.fcs	RYk17_aIL10_12_UNS	aIL10	RYk17	twelve	aIL10_twelve	UNS	C06
845	Sample_33	13	15	0.02	15.0788	15.0788	4.01805	Sample_33	AI_export_Plate 1 UNS LN_C6_C06_CD8p_CD8_live.fcs	RYk17_aIL10_12_UNS	aIL10	RYk17	twelve	aIL10_twelve	UNS	C06
846	Sample_33	14	0	0	NA	NA	NA	Sample_33	AI_export_Plate 1 UNS LN_C6_C06_CD8p_CD8_live.fcs	RYk17_aIL10_12_UNS	aIL10	RYk17	twelve	aIL10_twelve	UNS	C06
847	Sample_33	15	0	0	NA	NA	NA	Sample_33	AI_export_Plate 1 UNS LN_C6_C06_CD8p_CD8_live.fcs	RYk17_aIL10_12_UNS	aIL10	RYk17	twelve	aIL10_twelve	UNS	C06
848	Sample_33	2	240	0.32	4.56891	4.71621	2.61854	Sample_33	AI_export_Plate 1 UNS LN_C6_C06_CD8p_CD8_live.fcs	RYk17_aIL10_12_UNS	aIL10	RYk17	twelve	aIL10_twelve	UNS	C06
849	Sample_33	3	95	0.126667	3.8408	3.50862	3.1279	Sample_33	AI_export_Plate 1 UNS LN_C6_C06_CD8p_CD8_live.fcs	RYk17_aIL10_12_UNS	aIL10	RYk17	twelve	aIL10_twelve	UNS	C06
850	Sample_33	4	45	0.06	NA	NA	NA	Sample_33	AI_export_Plate 1 UNS LN_C6_C06_CD8p_CD8_live.fcs	RYk17_aIL10_12_UNS	aIL10	RYk17	twelve	aIL10_twelve	UNS	C06
851	Sample_33	5	94	0.125333	18.5431	18.6095	1.39479	Sample_33	AI_export_Plate 1 UNS LN_C6_C06_CD8p_CD8_live.fcs	RYk17_aIL10_12_UNS	aIL10	RYk17	twelve	aIL10_twelve	UNS	C06
852	Sample_33	6	8	0.0106667	NA	NA	NA	Sample_33	AI_export_Plate 1 UNS LN_C6_C06_CD8p_CD8_live.fcs	RYk17_aIL10_12_UNS	aIL10	RYk17	twelve	aIL10_twelve	UNS	C06
853	Sample_33	7	17	0.0226667	19.5634	19.5961	0.139407	Sample_33	AI_export_Plate 1 UNS LN_C6_C06_CD8p_CD8_live.fcs	RYk17_aIL10_12_UNS	aIL10	RYk17	twelve	aIL10_twelve	UNS	C06
854	Sample_33	8	59	0.0786667	11.4736	11.7375	1.6214	Sample_33	AI_export_Plate 1 UNS LN_C6_C06_CD8p_CD8_live.fcs	RYk17_aIL10_12_UNS	aIL10	RYk17	twelve	aIL10_twelve	UNS	C06
855	Sample_33	9	40	0.0533333	15.8344	15.8914	0.803636	Sample_33	AI_export_Plate 1 UNS LN_C6_C06_CD8p_CD8_live.fcs	RYk17_aIL10_12_UNS	aIL10	RYk17	twelve	aIL10_twelve	UNS	C06
856	Sample_34	1	104	0.138667	21.2092	21.8871	3.38307	Sample_34	AI_export_Plate 1 UNS LN_C7_C07_CD8p_CD8_live.fcs	RVz16_Control_12_UNS	Control	RVz16	twelve	Control_twelve	UNS	C07
857	Sample_34	10	17	0.0226667	15.0408	15.5743	3.01471	Sample_34	AI_export_Plate 1 UNS LN_C7_C07_CD8p_CD8_live.fcs	RVz16_Control_12_UNS	Control	RVz16	twelve	Control_twelve	UNS	C07
858	Sample_34	11	22	0.0293333	16.4448	19.4969	5.98765	Sample_34	AI_export_Plate 1 UNS LN_C7_C07_CD8p_CD8_live.fcs	RVz16_Control_12_UNS	Control	RVz16	twelve	Control_twelve	UNS	C07
859	Sample_34	12	14	0.0186667	8.87062	8.81177	0.442881	Sample_34	AI_export_Plate 1 UNS LN_C7_C07_CD8p_CD8_live.fcs	RVz16_Control_12_UNS	Control	RVz16	twelve	Control_twelve	UNS	C07
860	Sample_34	13	5	0.00666667	NA	NA	NA	Sample_34	AI_export_Plate 1 UNS LN_C7_C07_CD8p_CD8_live.fcs	RVz16_Control_12_UNS	Control	RVz16	twelve	Control_twelve	UNS	C07
861	Sample_34	14	0	0	NA	NA	NA	Sample_34	AI_export_Plate 1 UNS LN_C7_C07_CD8p_CD8_live.fcs	RVz16_Control_12_UNS	Control	RVz16	twelve	Control_twelve	UNS	C07
862	Sample_34	15	2	0.00266667	8.66621	8.66621	0.956472	Sample_34	AI_export_Plate 1 UNS LN_C7_C07_CD8p_CD8_live.fcs	RVz16_Control_12_UNS	Control	RVz16	twelve	Control_twelve	UNS	C07
863	Sample_34	2	230	0.306667	4.6241	4.65045	2.19382	Sample_34	AI_export_Plate 1 UNS LN_C7_C07_CD8p_CD8_live.fcs	RVz16_Control_12_UNS	Control	RVz16	twelve	Control_twelve	UNS	C07
864	Sample_34	3	93	0.124	3.32522	3.17816	2.08418	Sample_34	AI_export_Plate 1 UNS LN_C7_C07_CD8p_CD8_live.fcs	RVz16_Control_12_UNS	Control	RVz16	twelve	Control_twelve	UNS	C07
865	Sample_34	4	55	0.0733333	NA	NA	NA	Sample_34	AI_export_Plate 1 UNS LN_C7_C07_CD8p_CD8_live.fcs	RVz16_Control_12_UNS	Control	RVz16	twelve	Control_twelve	UNS	C07
866	Sample_34	5	100	0.133333	18.4026	18.572	2.14753	Sample_34	AI_export_Plate 1 UNS LN_C7_C07_CD8p_CD8_live.fcs	RVz16_Control_12_UNS	Control	RVz16	twelve	Control_twelve	UNS	C07
867	Sample_34	6	10	0.0133333	NA	NA	NA	Sample_34	AI_export_Plate 1 UNS LN_C7_C07_CD8p_CD8_live.fcs	RVz16_Control_12_UNS	Control	RVz16	twelve	Control_twelve	UNS	C07
868	Sample_34	7	12	0.016	19.5345	19.5961	0.185743	Sample_34	AI_export_Plate 1 UNS LN_C7_C07_CD8p_CD8_live.fcs	RVz16_Control_12_UNS	Control	RVz16	twelve	Control_twelve	UNS	C07
869	Sample_34	8	47	0.0626667	11.3029	11.7297	1.84704	Sample_34	AI_export_Plate 1 UNS LN_C7_C07_CD8p_CD8_live.fcs	RVz16_Control_12_UNS	Control	RVz16	twelve	Control_twelve	UNS	C07
870	Sample_34	9	39	0.052	15.8482	15.8914	0.849113	Sample_34	AI_export_Plate 1 UNS LN_C7_C07_CD8p_CD8_live.fcs	RVz16_Control_12_UNS	Control	RVz16	twelve	Control_twelve	UNS	C07
871	Sample_35	1	84	0.112	21.4386	21.7966	3.12598	Sample_35	AI_export_Plate 1 UNS LN_C8_C08_CD8p_CD8_live.fcs	RYm17_aIL10+aPD1_12_UNS	aIL10+aPD1	RYm17	twelve	aIL10+aPD1_twelve	UNS	C08
872	Sample_35	10	27	0.036	14.1366	15.5743	3.25881	Sample_35	AI_export_Plate 1 UNS LN_C8_C08_CD8p_CD8_live.fcs	RYm17_aIL10+aPD1_12_UNS	aIL10+aPD1	RYm17	twelve	aIL10+aPD1_twelve	UNS	C08
873	Sample_35	11	17	0.0226667	19.1348	19.5483	0.903624	Sample_35	AI_export_Plate 1 UNS LN_C8_C08_CD8p_CD8_live.fcs	RYm17_aIL10+aPD1_12_UNS	aIL10+aPD1	RYm17	twelve	aIL10+aPD1_twelve	UNS	C08
874	Sample_35	12	15	0.02	8.39609	8.40946	0.661982	Sample_35	AI_export_Plate 1 UNS LN_C8_C08_CD8p_CD8_live.fcs	RYm17_aIL10+aPD1_12_UNS	aIL10+aPD1	RYm17	twelve	aIL10+aPD1_twelve	UNS	C08
875	Sample_35	13	22	0.0293333	16.0326	17.9074	3.27376	Sample_35	AI_export_Plate 1 UNS LN_C8_C08_CD8p_CD8_live.fcs	RYm17_aIL10+aPD1_12_UNS	aIL10+aPD1	RYm17	twelve	aIL10+aPD1_twelve	UNS	C08
876	Sample_35	14	0	0	NA	NA	NA	Sample_35	AI_export_Plate 1 UNS LN_C8_C08_CD8p_CD8_live.fcs	RYm17_aIL10+aPD1_12_UNS	aIL10+aPD1	RYm17	twelve	aIL10+aPD1_twelve	UNS	C08
877	Sample_35	15	1	0.00133333	9.04525	9.04525	NA	Sample_35	AI_export_Plate 1 UNS LN_C8_C08_CD8p_CD8_live.fcs	RYm17_aIL10+aPD1_12_UNS	aIL10+aPD1	RYm17	twelve	aIL10+aPD1_twelve	UNS	C08
878	Sample_35	2	186	0.248	4.42456	4.52145	2.3922	Sample_35	AI_export_Plate 1 UNS LN_C8_C08_CD8p_CD8_live.fcs	RYm17_aIL10+aPD1_12_UNS	aIL10+aPD1	RYm17	twelve	aIL10+aPD1_twelve	UNS	C08
879	Sample_35	3	83	0.110667	3.56896	3.60036	1.72903	Sample_35	AI_export_Plate 1 UNS LN_C8_C08_CD8p_CD8_live.fcs	RYm17_aIL10+aPD1_12_UNS	aIL10+aPD1	RYm17	twelve	aIL10+aPD1_twelve	UNS	C08
880	Sample_35	4	68	0.0906667	10.5987	10.5987	NA	Sample_35	AI_export_Plate 1 UNS LN_C8_C08_CD8p_CD8_live.fcs	RYm17_aIL10+aPD1_12_UNS	aIL10+aPD1	RYm17	twelve	aIL10+aPD1_twelve	UNS	C08
881	Sample_35	5	80	0.106667	18.3165	18.8664	2.21628	Sample_35	AI_export_Plate 1 UNS LN_C8_C08_CD8p_CD8_live.fcs	RYm17_aIL10+aPD1_12_UNS	aIL10+aPD1	RYm17	twelve	aIL10+aPD1_twelve	UNS	C08
882	Sample_35	6	19	0.0253333	19.5021	19.5021	NA	Sample_35	AI_export_Plate 1 UNS LN_C8_C08_CD8p_CD8_live.fcs	RYm17_aIL10+aPD1_12_UNS	aIL10+aPD1	RYm17	twelve	aIL10+aPD1_twelve	UNS	C08
883	Sample_35	7	20	0.0266667	19.3759	19.5961	0.76866	Sample_35	AI_export_Plate 1 UNS LN_C8_C08_CD8p_CD8_live.fcs	RYm17_aIL10+aPD1_12_UNS	aIL10+aPD1	RYm17	twelve	aIL10+aPD1_twelve	UNS	C08
884	Sample_35	8	110	0.146667	11.8067	11.8387	1.40156	Sample_35	AI_export_Plate 1 UNS LN_C8_C08_CD8p_CD8_live.fcs	RYm17_aIL10+aPD1_12_UNS	aIL10+aPD1	RYm17	twelve	aIL10+aPD1_twelve	UNS	C08
885	Sample_35	9	18	0.024	15.6197	15.8914	1.89781	Sample_35	AI_export_Plate 1 UNS LN_C8_C08_CD8p_CD8_live.fcs	RYm17_aIL10+aPD1_12_UNS	aIL10+aPD1	RYm17	twelve	aIL10+aPD1_twelve	UNS	C08
886	Sample_36	1	127	0.169333	21.6227	21.9773	2.39275	Sample_36	AI_export_Plate 1 UNS LN_C9_C09_CD8p_CD8_live.fcs	RHm17_aIL10_12_UNS	aIL10	RHm17	twelve	aIL10_twelve	UNS	C09
887	Sample_36	10	21	0.028	13.1555	15.4458	3.76818	Sample_36	AI_export_Plate 1 UNS LN_C9_C09_CD8p_CD8_live.fcs	RHm17_aIL10_12_UNS	aIL10	RHm17	twelve	aIL10_twelve	UNS	C09
888	Sample_36	11	36	0.048	19.1514	19.5483	2.8274	Sample_36	AI_export_Plate 1 UNS LN_C9_C09_CD8p_CD8_live.fcs	RHm17_aIL10_12_UNS	aIL10	RHm17	twelve	aIL10_twelve	UNS	C09
889	Sample_36	12	17	0.0226667	9.69781	8.75295	6.15045	Sample_36	AI_export_Plate 1 UNS LN_C9_C09_CD8p_CD8_live.fcs	RHm17_aIL10_12_UNS	aIL10	RHm17	twelve	aIL10_twelve	UNS	C09
890	Sample_36	13	10	0.0133333	NA	NA	NA	Sample_36	AI_export_Plate 1 UNS LN_C9_C09_CD8p_CD8_live.fcs	RHm17_aIL10_12_UNS	aIL10	RHm17	twelve	aIL10_twelve	UNS	C09
891	Sample_36	14	0	0	NA	NA	NA	Sample_36	AI_export_Plate 1 UNS LN_C9_C09_CD8p_CD8_live.fcs	RHm17_aIL10_12_UNS	aIL10	RHm17	twelve	aIL10_twelve	UNS	C09
892	Sample_36	15	1	0.00133333	24.7633	24.7633	NA	Sample_36	AI_export_Plate 1 UNS LN_C9_C09_CD8p_CD8_live.fcs	RHm17_aIL10_12_UNS	aIL10	RHm17	twelve	aIL10_twelve	UNS	C09
893	Sample_36	2	200	0.266667	4.63537	4.52145	2.9278	Sample_36	AI_export_Plate 1 UNS LN_C9_C09_CD8p_CD8_live.fcs	RHm17_aIL10_12_UNS	aIL10	RHm17	twelve	aIL10_twelve	UNS	C09
894	Sample_36	3	115	0.153333	3.70028	3.28425	2.66073	Sample_36	AI_export_Plate 1 UNS LN_C9_C09_CD8p_CD8_live.fcs	RHm17_aIL10_12_UNS	aIL10	RHm17	twelve	aIL10_twelve	UNS	C09
895	Sample_36	4	46	0.0613333	NA	NA	NA	Sample_36	AI_export_Plate 1 UNS LN_C9_C09_CD8p_CD8_live.fcs	RHm17_aIL10_12_UNS	aIL10	RHm17	twelve	aIL10_twelve	UNS	C09
896	Sample_36	5	86	0.114667	18.6726	18.9495	1.5258	Sample_36	AI_export_Plate 1 UNS LN_C9_C09_CD8p_CD8_live.fcs	RHm17_aIL10_12_UNS	aIL10	RHm17	twelve	aIL10_twelve	UNS	C09
897	Sample_36	6	7	0.00933333	NA	NA	NA	Sample_36	AI_export_Plate 1 UNS LN_C9_C09_CD8p_CD8_live.fcs	RHm17_aIL10_12_UNS	aIL10	RHm17	twelve	aIL10_twelve	UNS	C09
898	Sample_36	7	11	0.0146667	19.5332	19.5961	0.153444	Sample_36	AI_export_Plate 1 UNS LN_C9_C09_CD8p_CD8_live.fcs	RHm17_aIL10_12_UNS	aIL10	RHm17	twelve	aIL10_twelve	UNS	C09
899	Sample_36	8	38	0.0506667	11.7033	11.9372	2.11974	Sample_36	AI_export_Plate 1 UNS LN_C9_C09_CD8p_CD8_live.fcs	RHm17_aIL10_12_UNS	aIL10	RHm17	twelve	aIL10_twelve	UNS	C09
900	Sample_36	9	35	0.0466667	15.9915	15.8914	1.32853	Sample_36	AI_export_Plate 1 UNS LN_C9_C09_CD8p_CD8_live.fcs	RHm17_aIL10_12_UNS	aIL10	RHm17	twelve	aIL10_twelve	UNS	C09
901	Sample_37	1	56	0.0746667	21.4002	21.955	3.37217	Sample_37	AI_export_Plate 1 UNS LN_D1_D01_CD8p_CD8_live.fcs	RRh17_aIL10+aPD1_12_UNS	aIL10+aPD1	RRh17	twelve	aIL10+aPD1_twelve	UNS	D01
902	Sample_37	10	14	0.0186667	14.2758	16.8967	5.72716	Sample_37	AI_export_Plate 1 UNS LN_D1_D01_CD8p_CD8_live.fcs	RRh17_aIL10+aPD1_12_UNS	aIL10+aPD1	RRh17	twelve	aIL10+aPD1_twelve	UNS	D01
903	Sample_37	11	25	0.0333333	17.6445	19.5483	5.0809	Sample_37	AI_export_Plate 1 UNS LN_D1_D01_CD8p_CD8_live.fcs	RRh17_aIL10+aPD1_12_UNS	aIL10+aPD1	RRh17	twelve	aIL10+aPD1_twelve	UNS	D01
904	Sample_37	12	14	0.0186667	9.01669	8.92573	1.14892	Sample_37	AI_export_Plate 1 UNS LN_D1_D01_CD8p_CD8_live.fcs	RRh17_aIL10+aPD1_12_UNS	aIL10+aPD1	RRh17	twelve	aIL10+aPD1_twelve	UNS	D01
905	Sample_37	13	4	0.00533333	NA	NA	NA	Sample_37	AI_export_Plate 1 UNS LN_D1_D01_CD8p_CD8_live.fcs	RRh17_aIL10+aPD1_12_UNS	aIL10+aPD1	RRh17	twelve	aIL10+aPD1_twelve	UNS	D01
906	Sample_37	14	1	0.00133333	19.5483	19.5483	NA	Sample_37	AI_export_Plate 1 UNS LN_D1_D01_CD8p_CD8_live.fcs	RRh17_aIL10+aPD1_12_UNS	aIL10+aPD1	RRh17	twelve	aIL10+aPD1_twelve	UNS	D01
907	Sample_37	15	0	0	NA	NA	NA	Sample_37	AI_export_Plate 1 UNS LN_D1_D01_CD8p_CD8_live.fcs	RRh17_aIL10+aPD1_12_UNS	aIL10+aPD1	RRh17	twelve	aIL10+aPD1_twelve	UNS	D01
908	Sample_37	2	276	0.368	4.85373	4.71621	2.52251	Sample_37	AI_export_Plate 1 UNS LN_D1_D01_CD8p_CD8_live.fcs	RRh17_aIL10+aPD1_12_UNS	aIL10+aPD1	RRh17	twelve	aIL10+aPD1_twelve	UNS	D01
909	Sample_37	3	143	0.190667	3.91177	3.51285	3.29806	Sample_37	AI_export_Plate 1 UNS LN_D1_D01_CD8p_CD8_live.fcs	RRh17_aIL10+aPD1_12_UNS	aIL10+aPD1	RRh17	twelve	aIL10+aPD1_twelve	UNS	D01
910	Sample_37	4	24	0.032	16.0052	16.0052	NA	Sample_37	AI_export_Plate 1 UNS LN_D1_D01_CD8p_CD8_live.fcs	RRh17_aIL10+aPD1_12_UNS	aIL10+aPD1	RRh17	twelve	aIL10+aPD1_twelve	UNS	D01
911	Sample_37	5	73	0.0973333	17.7929	18.3526	3.09839	Sample_37	AI_export_Plate 1 UNS LN_D1_D01_CD8p_CD8_live.fcs	RRh17_aIL10+aPD1_12_UNS	aIL10+aPD1	RRh17	twelve	aIL10+aPD1_twelve	UNS	D01
912	Sample_37	6	22	0.0293333	19.5491	19.5491	0.0664687	Sample_37	AI_export_Plate 1 UNS LN_D1_D01_CD8p_CD8_live.fcs	RRh17_aIL10+aPD1_12_UNS	aIL10+aPD1	RRh17	twelve	aIL10+aPD1_twelve	UNS	D01
913	Sample_37	7	53	0.0706667	19.6614	19.5961	0.692593	Sample_37	AI_export_Plate 1 UNS LN_D1_D01_CD8p_CD8_live.fcs	RRh17_aIL10+aPD1_12_UNS	aIL10+aPD1	RRh17	twelve	aIL10+aPD1_twelve	UNS	D01
914	Sample_37	8	23	0.0306667	11.5409	11.7791	1.26187	Sample_37	AI_export_Plate 1 UNS LN_D1_D01_CD8p_CD8_live.fcs	RRh17_aIL10+aPD1_12_UNS	aIL10+aPD1	RRh17	twelve	aIL10+aPD1_twelve	UNS	D01
915	Sample_37	9	22	0.0293333	16.6159	16.0336	1.88954	Sample_37	AI_export_Plate 1 UNS LN_D1_D01_CD8p_CD8_live.fcs	RRh17_aIL10+aPD1_12_UNS	aIL10+aPD1	RRh17	twelve	aIL10+aPD1_twelve	UNS	D01
916	Sample_38	1	100	0.133333	21.8904	22.2934	2.51336	Sample_38	AI_export_Plate 1 UNS LN_D10_D10_CD8p_CD8_live.fcs	RYm17_aIL10+aPD1_21_UNS	aIL10+aPD1	RYm17	twenty_one	aIL10+aPD1_twenty_one	UNS	D10
917	Sample_38	10	37	0.0493333	16.3217	17.0593	2.66224	Sample_38	AI_export_Plate 1 UNS LN_D10_D10_CD8p_CD8_live.fcs	RYm17_aIL10+aPD1_21_UNS	aIL10+aPD1	RYm17	twenty_one	aIL10+aPD1_twenty_one	UNS	D10
918	Sample_38	11	22	0.0293333	18.9532	19.5483	1.11267	Sample_38	AI_export_Plate 1 UNS LN_D10_D10_CD8p_CD8_live.fcs	RYm17_aIL10+aPD1_21_UNS	aIL10+aPD1	RYm17	twenty_one	aIL10+aPD1_twenty_one	UNS	D10
919	Sample_38	12	14	0.0186667	8.76321	8.77559	1.66457	Sample_38	AI_export_Plate 1 UNS LN_D10_D10_CD8p_CD8_live.fcs	RYm17_aIL10+aPD1_21_UNS	aIL10+aPD1	RYm17	twenty_one	aIL10+aPD1_twenty_one	UNS	D10
920	Sample_38	13	27	0.036	NA	NA	NA	Sample_38	AI_export_Plate 1 UNS LN_D10_D10_CD8p_CD8_live.fcs	RYm17_aIL10+aPD1_21_UNS	aIL10+aPD1	RYm17	twenty_one	aIL10+aPD1_twenty_one	UNS	D10
921	Sample_38	14	2	0.00266667	2.60468	2.60468	2.88602	Sample_38	AI_export_Plate 1 UNS LN_D10_D10_CD8p_CD8_live.fcs	RYm17_aIL10+aPD1_21_UNS	aIL10+aPD1	RYm17	twenty_one	aIL10+aPD1_twenty_one	UNS	D10
922	Sample_38	15	2	0.00266667	8.68769	8.68769	11.8408	Sample_38	AI_export_Plate 1 UNS LN_D10_D10_CD8p_CD8_live.fcs	RYm17_aIL10+aPD1_21_UNS	aIL10+aPD1	RYm17	twenty_one	aIL10+aPD1_twenty_one	UNS	D10
923	Sample_38	2	75	0.1	5.33647	5.40269	2.87455	Sample_38	AI_export_Plate 1 UNS LN_D10_D10_CD8p_CD8_live.fcs	RYm17_aIL10+aPD1_21_UNS	aIL10+aPD1	RYm17	twenty_one	aIL10+aPD1_twenty_one	UNS	D10
924	Sample_38	3	72	0.096	3.82729	3.08956	3.71047	Sample_38	AI_export_Plate 1 UNS LN_D10_D10_CD8p_CD8_live.fcs	RYm17_aIL10+aPD1_21_UNS	aIL10+aPD1	RYm17	twenty_one	aIL10+aPD1_twenty_one	UNS	D10
925	Sample_38	4	154	0.205333	NA	NA	NA	Sample_38	AI_export_Plate 1 UNS LN_D10_D10_CD8p_CD8_live.fcs	RYm17_aIL10+aPD1_21_UNS	aIL10+aPD1	RYm17	twenty_one	aIL10+aPD1_twenty_one	UNS	D10
926	Sample_38	5	79	0.105333	17.9211	18.2813	2.39598	Sample_38	AI_export_Plate 1 UNS LN_D10_D10_CD8p_CD8_live.fcs	RYm17_aIL10+aPD1_21_UNS	aIL10+aPD1	RYm17	twenty_one	aIL10+aPD1_twenty_one	UNS	D10
927	Sample_38	6	37	0.0493333	NA	NA	NA	Sample_38	AI_export_Plate 1 UNS LN_D10_D10_CD8p_CD8_live.fcs	RYm17_aIL10+aPD1_21_UNS	aIL10+aPD1	RYm17	twenty_one	aIL10+aPD1_twenty_one	UNS	D10
928	Sample_38	7	18	0.024	19.453	19.596	0.21737	Sample_38	AI_export_Plate 1 UNS LN_D10_D10_CD8p_CD8_live.fcs	RYm17_aIL10+aPD1_21_UNS	aIL10+aPD1	RYm17	twenty_one	aIL10+aPD1_twenty_one	UNS	D10
929	Sample_38	8	60	0.08	11.646	11.3179	2.14699	Sample_38	AI_export_Plate 1 UNS LN_D10_D10_CD8p_CD8_live.fcs	RYm17_aIL10+aPD1_21_UNS	aIL10+aPD1	RYm17	twenty_one	aIL10+aPD1_twenty_one	UNS	D10
930	Sample_38	9	51	0.068	16.1147	15.9393	1.18625	Sample_38	AI_export_Plate 1 UNS LN_D10_D10_CD8p_CD8_live.fcs	RYm17_aIL10+aPD1_21_UNS	aIL10+aPD1	RYm17	twenty_one	aIL10+aPD1_twenty_one	UNS	D10
931	Sample_39	1	104	0.138667	21.8992	21.8618	1.81565	Sample_39	AI_export_Plate 1 UNS LN_D11_D11_CD8p_CD8_live.fcs	RHm17_aIL10_21_UNS	aIL10	RHm17	twenty_one	aIL10_twenty_one	UNS	D11
932	Sample_39	10	42	0.056	16.1215	16.6884	2.44567	Sample_39	AI_export_Plate 1 UNS LN_D11_D11_CD8p_CD8_live.fcs	RHm17_aIL10_21_UNS	aIL10	RHm17	twenty_one	aIL10_twenty_one	UNS	D11
933	Sample_39	11	30	0.04	18.6941	19.5483	2.94262	Sample_39	AI_export_Plate 1 UNS LN_D11_D11_CD8p_CD8_live.fcs	RHm17_aIL10_21_UNS	aIL10	RHm17	twenty_one	aIL10_twenty_one	UNS	D11
934	Sample_39	12	8	0.0106667	9.29665	8.74396	1.53634	Sample_39	AI_export_Plate 1 UNS LN_D11_D11_CD8p_CD8_live.fcs	RHm17_aIL10_21_UNS	aIL10	RHm17	twenty_one	aIL10_twenty_one	UNS	D11
935	Sample_39	13	26	0.0346667	17.9154	17.9154	NA	Sample_39	AI_export_Plate 1 UNS LN_D11_D11_CD8p_CD8_live.fcs	RHm17_aIL10_21_UNS	aIL10	RHm17	twenty_one	aIL10_twenty_one	UNS	D11
936	Sample_39	14	1	0.00133333	NA	NA	NA	Sample_39	AI_export_Plate 1 UNS LN_D11_D11_CD8p_CD8_live.fcs	RHm17_aIL10_21_UNS	aIL10	RHm17	twenty_one	aIL10_twenty_one	UNS	D11
937	Sample_39	15	3	0.004	9.19389	9.19389	0.210218	Sample_39	AI_export_Plate 1 UNS LN_D11_D11_CD8p_CD8_live.fcs	RHm17_aIL10_21_UNS	aIL10	RHm17	twenty_one	aIL10_twenty_one	UNS	D11
938	Sample_39	2	89	0.118667	4.27218	4.52145	2.17909	Sample_39	AI_export_Plate 1 UNS LN_D11_D11_CD8p_CD8_live.fcs	RHm17_aIL10_21_UNS	aIL10	RHm17	twenty_one	aIL10_twenty_one	UNS	D11
939	Sample_39	3	65	0.0866667	4.37134	3.66676	2.90302	Sample_39	AI_export_Plate 1 UNS LN_D11_D11_CD8p_CD8_live.fcs	RHm17_aIL10_21_UNS	aIL10	RHm17	twenty_one	aIL10_twenty_one	UNS	D11
940	Sample_39	4	144	0.192	9.57194	9.57194	8.35118	Sample_39	AI_export_Plate 1 UNS LN_D11_D11_CD8p_CD8_live.fcs	RHm17_aIL10_21_UNS	aIL10	RHm17	twenty_one	aIL10_twenty_one	UNS	D11
941	Sample_39	5	75	0.1	18.7884	18.951	1.18663	Sample_39	AI_export_Plate 1 UNS LN_D11_D11_CD8p_CD8_live.fcs	RHm17_aIL10_21_UNS	aIL10	RHm17	twenty_one	aIL10_twenty_one	UNS	D11
942	Sample_39	6	81	0.108	NA	NA	NA	Sample_39	AI_export_Plate 1 UNS LN_D11_D11_CD8p_CD8_live.fcs	RHm17_aIL10_21_UNS	aIL10	RHm17	twenty_one	aIL10_twenty_one	UNS	D11
943	Sample_39	7	36	0.048	18.9373	19.3451	2.78097	Sample_39	AI_export_Plate 1 UNS LN_D11_D11_CD8p_CD8_live.fcs	RHm17_aIL10_21_UNS	aIL10	RHm17	twenty_one	aIL10_twenty_one	UNS	D11
944	Sample_39	8	22	0.0293333	12.4962	12.1263	1.77221	Sample_39	AI_export_Plate 1 UNS LN_D11_D11_CD8p_CD8_live.fcs	RHm17_aIL10_21_UNS	aIL10	RHm17	twenty_one	aIL10_twenty_one	UNS	D11
945	Sample_39	9	24	0.032	16.0107	15.8914	1.15972	Sample_39	AI_export_Plate 1 UNS LN_D11_D11_CD8p_CD8_live.fcs	RHm17_aIL10_21_UNS	aIL10	RHm17	twenty_one	aIL10_twenty_one	UNS	D11
946	Sample_4	1	163	0.217333	22.1743	22.6144	2.60591	Sample_4	AI_export_Plate 1 UNS LN_A12_A12_CD8p_CD8_live.fcs	RBe17_Control_-1_UNS	Control	RBe17	minus_one	Control_minus_one	UNS	A12
947	Sample_4	10	11	0.0146667	15.7817	16.87	3.02777	Sample_4	AI_export_Plate 1 UNS LN_A12_A12_CD8p_CD8_live.fcs	RBe17_Control_-1_UNS	Control	RBe17	minus_one	Control_minus_one	UNS	A12
948	Sample_4	11	30	0.04	19.1991	19.5483	0.89617	Sample_4	AI_export_Plate 1 UNS LN_A12_A12_CD8p_CD8_live.fcs	RBe17_Control_-1_UNS	Control	RBe17	minus_one	Control_minus_one	UNS	A12
949	Sample_4	12	6	0.008	12.0185	8.88365	6.47363	Sample_4	AI_export_Plate 1 UNS LN_A12_A12_CD8p_CD8_live.fcs	RBe17_Control_-1_UNS	Control	RBe17	minus_one	Control_minus_one	UNS	A12
950	Sample_4	13	7	0.00933333	NA	NA	NA	Sample_4	AI_export_Plate 1 UNS LN_A12_A12_CD8p_CD8_live.fcs	RBe17_Control_-1_UNS	Control	RBe17	minus_one	Control_minus_one	UNS	A12
951	Sample_4	14	1	0.00133333	0.56396	0.56396	NA	Sample_4	AI_export_Plate 1 UNS LN_A12_A12_CD8p_CD8_live.fcs	RBe17_Control_-1_UNS	Control	RBe17	minus_one	Control_minus_one	UNS	A12
952	Sample_4	15	0	0	NA	NA	NA	Sample_4	AI_export_Plate 1 UNS LN_A12_A12_CD8p_CD8_live.fcs	RBe17_Control_-1_UNS	Control	RBe17	minus_one	Control_minus_one	UNS	A12
953	Sample_4	2	151	0.201333	4.07344	4.57357	2.22792	Sample_4	AI_export_Plate 1 UNS LN_A12_A12_CD8p_CD8_live.fcs	RBe17_Control_-1_UNS	Control	RBe17	minus_one	Control_minus_one	UNS	A12
954	Sample_4	3	97	0.129333	3.82509	3.4381	2.61456	Sample_4	AI_export_Plate 1 UNS LN_A12_A12_CD8p_CD8_live.fcs	RBe17_Control_-1_UNS	Control	RBe17	minus_one	Control_minus_one	UNS	A12
955	Sample_4	4	69	0.092	NA	NA	NA	Sample_4	AI_export_Plate 1 UNS LN_A12_A12_CD8p_CD8_live.fcs	RBe17_Control_-1_UNS	Control	RBe17	minus_one	Control_minus_one	UNS	A12
956	Sample_4	5	80	0.106667	18.6252	18.8685	1.55039	Sample_4	AI_export_Plate 1 UNS LN_A12_A12_CD8p_CD8_live.fcs	RBe17_Control_-1_UNS	Control	RBe17	minus_one	Control_minus_one	UNS	A12
957	Sample_4	6	24	0.032	NA	NA	NA	Sample_4	AI_export_Plate 1 UNS LN_A12_A12_CD8p_CD8_live.fcs	RBe17_Control_-1_UNS	Control	RBe17	minus_one	Control_minus_one	UNS	A12
958	Sample_4	7	7	0.00933333	19.5065	19.5021	0.08377	Sample_4	AI_export_Plate 1 UNS LN_A12_A12_CD8p_CD8_live.fcs	RBe17_Control_-1_UNS	Control	RBe17	minus_one	Control_minus_one	UNS	A12
959	Sample_4	8	62	0.0826667	12.2296	12.1189	1.36743	Sample_4	AI_export_Plate 1 UNS LN_A12_A12_CD8p_CD8_live.fcs	RBe17_Control_-1_UNS	Control	RBe17	minus_one	Control_minus_one	UNS	A12
960	Sample_4	9	42	0.056	15.6905	15.8914	1.68257	Sample_4	AI_export_Plate 1 UNS LN_A12_A12_CD8p_CD8_live.fcs	RBe17_Control_-1_UNS	Control	RBe17	minus_one	Control_minus_one	UNS	A12
961	Sample_40	1	144	0.192	22.0226	22.4267	2.40442	Sample_40	AI_export_Plate 1 UNS LN_D12_D12_CD8p_CD8_live.fcs	RNy16_aIL10+aPD1_21_UNS	aIL10+aPD1	RNy16	twenty_one	aIL10+aPD1_twenty_one	UNS	D12
962	Sample_40	10	29	0.0386667	15.3239	15.7355	2.34793	Sample_40	AI_export_Plate 1 UNS LN_D12_D12_CD8p_CD8_live.fcs	RNy16_aIL10+aPD1_21_UNS	aIL10+aPD1	RNy16	twenty_one	aIL10+aPD1_twenty_one	UNS	D12
963	Sample_40	11	23	0.0306667	19.3303	19.5483	0.793648	Sample_40	AI_export_Plate 1 UNS LN_D12_D12_CD8p_CD8_live.fcs	RNy16_aIL10+aPD1_21_UNS	aIL10+aPD1	RNy16	twenty_one	aIL10+aPD1_twenty_one	UNS	D12
964	Sample_40	12	9	0.012	10.8806	8.69682	5.58004	Sample_40	AI_export_Plate 1 UNS LN_D12_D12_CD8p_CD8_live.fcs	RNy16_aIL10+aPD1_21_UNS	aIL10+aPD1	RNy16	twenty_one	aIL10+aPD1_twenty_one	UNS	D12
965	Sample_40	13	11	0.0146667	12.2402	12.2402	NA	Sample_40	AI_export_Plate 1 UNS LN_D12_D12_CD8p_CD8_live.fcs	RNy16_aIL10+aPD1_21_UNS	aIL10+aPD1	RNy16	twenty_one	aIL10+aPD1_twenty_one	UNS	D12
966	Sample_40	14	1	0.00133333	NA	NA	NA	Sample_40	AI_export_Plate 1 UNS LN_D12_D12_CD8p_CD8_live.fcs	RNy16_aIL10+aPD1_21_UNS	aIL10+aPD1	RNy16	twenty_one	aIL10+aPD1_twenty_one	UNS	D12
967	Sample_40	15	1	0.00133333	9.34254	9.34254	NA	Sample_40	AI_export_Plate 1 UNS LN_D12_D12_CD8p_CD8_live.fcs	RNy16_aIL10+aPD1_21_UNS	aIL10+aPD1	RNy16	twenty_one	aIL10+aPD1_twenty_one	UNS	D12
968	Sample_40	2	85	0.113333	4.83557	4.65046	2.24328	Sample_40	AI_export_Plate 1 UNS LN_D12_D12_CD8p_CD8_live.fcs	RNy16_aIL10+aPD1_21_UNS	aIL10+aPD1	RNy16	twenty_one	aIL10+aPD1_twenty_one	UNS	D12
969	Sample_40	3	88	0.117333	4.05499	3.66676	2.89022	Sample_40	AI_export_Plate 1 UNS LN_D12_D12_CD8p_CD8_live.fcs	RNy16_aIL10+aPD1_21_UNS	aIL10+aPD1	RNy16	twenty_one	aIL10+aPD1_twenty_one	UNS	D12
970	Sample_40	4	158	0.210667	NA	NA	NA	Sample_40	AI_export_Plate 1 UNS LN_D12_D12_CD8p_CD8_live.fcs	RNy16_aIL10+aPD1_21_UNS	aIL10+aPD1	RNy16	twenty_one	aIL10+aPD1_twenty_one	UNS	D12
971	Sample_40	5	91	0.121333	19.029	19.299	1.65207	Sample_40	AI_export_Plate 1 UNS LN_D12_D12_CD8p_CD8_live.fcs	RNy16_aIL10+aPD1_21_UNS	aIL10+aPD1	RNy16	twenty_one	aIL10+aPD1_twenty_one	UNS	D12
972	Sample_40	6	10	0.0133333	NA	NA	NA	Sample_40	AI_export_Plate 1 UNS LN_D12_D12_CD8p_CD8_live.fcs	RNy16_aIL10+aPD1_21_UNS	aIL10+aPD1	RNy16	twenty_one	aIL10+aPD1_twenty_one	UNS	D12
973	Sample_40	7	12	0.016	19.3689	19.5961	0.375462	Sample_40	AI_export_Plate 1 UNS LN_D12_D12_CD8p_CD8_live.fcs	RNy16_aIL10+aPD1_21_UNS	aIL10+aPD1	RNy16	twenty_one	aIL10+aPD1_twenty_one	UNS	D12
974	Sample_40	8	41	0.0546667	11.417	11.2882	1.67608	Sample_40	AI_export_Plate 1 UNS LN_D12_D12_CD8p_CD8_live.fcs	RNy16_aIL10+aPD1_21_UNS	aIL10+aPD1	RNy16	twenty_one	aIL10+aPD1_twenty_one	UNS	D12
975	Sample_40	9	47	0.0626667	15.6546	15.7804	1.28277	Sample_40	AI_export_Plate 1 UNS LN_D12_D12_CD8p_CD8_live.fcs	RNy16_aIL10+aPD1_21_UNS	aIL10+aPD1	RNy16	twenty_one	aIL10+aPD1_twenty_one	UNS	D12
976	Sample_41	1	158	0.210667	21.8434	22.4267	2.85222	Sample_41	AI_export_Plate 1 UNS LN_D2_D02_CD8p_CD8_live.fcs	RFn17_aIL10_12_UNS	aIL10	RFn17	twelve	aIL10_twelve	UNS	D02
977	Sample_41	10	15	0.02	15.5745	16.1655	3.91816	Sample_41	AI_export_Plate 1 UNS LN_D2_D02_CD8p_CD8_live.fcs	RFn17_aIL10_12_UNS	aIL10	RFn17	twelve	aIL10_twelve	UNS	D02
978	Sample_41	11	31	0.0413333	19.5944	19.5483	1.03224	Sample_41	AI_export_Plate 1 UNS LN_D2_D02_CD8p_CD8_live.fcs	RFn17_aIL10_12_UNS	aIL10	RFn17	twelve	aIL10_twelve	UNS	D02
979	Sample_41	12	10	0.0133333	10.0414	8.90266	2.12296	Sample_41	AI_export_Plate 1 UNS LN_D2_D02_CD8p_CD8_live.fcs	RFn17_aIL10_12_UNS	aIL10	RFn17	twelve	aIL10_twelve	UNS	D02
980	Sample_41	13	3	0.004	NA	NA	NA	Sample_41	AI_export_Plate 1 UNS LN_D2_D02_CD8p_CD8_live.fcs	RFn17_aIL10_12_UNS	aIL10	RFn17	twelve	aIL10_twelve	UNS	D02
981	Sample_41	14	0	0	NA	NA	NA	Sample_41	AI_export_Plate 1 UNS LN_D2_D02_CD8p_CD8_live.fcs	RFn17_aIL10_12_UNS	aIL10	RFn17	twelve	aIL10_twelve	UNS	D02
982	Sample_41	15	2	0.00266667	9.34254	9.34254	8.62169e-10	Sample_41	AI_export_Plate 1 UNS LN_D2_D02_CD8p_CD8_live.fcs	RFn17_aIL10_12_UNS	aIL10	RFn17	twelve	aIL10_twelve	UNS	D02
983	Sample_41	2	151	0.201333	4.57054	4.60405	2.62279	Sample_41	AI_export_Plate 1 UNS LN_D2_D02_CD8p_CD8_live.fcs	RFn17_aIL10_12_UNS	aIL10	RFn17	twelve	aIL10_twelve	UNS	D02
984	Sample_41	3	122	0.162667	3.67946	3.60651	1.90186	Sample_41	AI_export_Plate 1 UNS LN_D2_D02_CD8p_CD8_live.fcs	RFn17_aIL10_12_UNS	aIL10	RFn17	twelve	aIL10_twelve	UNS	D02
985	Sample_41	4	56	0.0746667	18.3299	18.3299	1.70047	Sample_41	AI_export_Plate 1 UNS LN_D2_D02_CD8p_CD8_live.fcs	RFn17_aIL10_12_UNS	aIL10	RFn17	twelve	aIL10_twelve	UNS	D02
986	Sample_41	5	108	0.144	18.6195	18.7154	1.62524	Sample_41	AI_export_Plate 1 UNS LN_D2_D02_CD8p_CD8_live.fcs	RFn17_aIL10_12_UNS	aIL10	RFn17	twelve	aIL10_twelve	UNS	D02
987	Sample_41	6	14	0.0186667	NA	NA	NA	Sample_41	AI_export_Plate 1 UNS LN_D2_D02_CD8p_CD8_live.fcs	RFn17_aIL10_12_UNS	aIL10	RFn17	twelve	aIL10_twelve	UNS	D02
988	Sample_41	7	12	0.016	19.5825	19.5961	0.0393305	Sample_41	AI_export_Plate 1 UNS LN_D2_D02_CD8p_CD8_live.fcs	RFn17_aIL10_12_UNS	aIL10	RFn17	twelve	aIL10_twelve	UNS	D02
989	Sample_41	8	47	0.0626667	11.7355	11.8674	2.23937	Sample_41	AI_export_Plate 1 UNS LN_D2_D02_CD8p_CD8_live.fcs	RFn17_aIL10_12_UNS	aIL10	RFn17	twelve	aIL10_twelve	UNS	D02
990	Sample_41	9	21	0.028	15.7808	15.8914	1.9495	Sample_41	AI_export_Plate 1 UNS LN_D2_D02_CD8p_CD8_live.fcs	RFn17_aIL10_12_UNS	aIL10	RFn17	twelve	aIL10_twelve	UNS	D02
991	Sample_42	1	145	0.193333	21.6066	22.1591	2.86131	Sample_42	AI_export_Plate 1 UNS LN_D3_D03_CD8p_CD8_live.fcs	RVm17_aIL10_12_UNS	aIL10	RVm17	twelve	aIL10_twelve	UNS	D03
992	Sample_42	10	10	0.0133333	15.015	15.7355	3.33392	Sample_42	AI_export_Plate 1 UNS LN_D3_D03_CD8p_CD8_live.fcs	RVm17_aIL10_12_UNS	aIL10	RVm17	twelve	aIL10_twelve	UNS	D03
993	Sample_42	11	40	0.0533333	18.7161	19.5483	2.14629	Sample_42	AI_export_Plate 1 UNS LN_D3_D03_CD8p_CD8_live.fcs	RVm17_aIL10_12_UNS	aIL10	RVm17	twelve	aIL10_twelve	UNS	D03
994	Sample_42	12	7	0.00933333	10.954	12.754	2.77106	Sample_42	AI_export_Plate 1 UNS LN_D3_D03_CD8p_CD8_live.fcs	RVm17_aIL10_12_UNS	aIL10	RVm17	twelve	aIL10_twelve	UNS	D03
995	Sample_42	13	7	0.00933333	NA	NA	NA	Sample_42	AI_export_Plate 1 UNS LN_D3_D03_CD8p_CD8_live.fcs	RVm17_aIL10_12_UNS	aIL10	RVm17	twelve	aIL10_twelve	UNS	D03
996	Sample_42	14	0	0	NA	NA	NA	Sample_42	AI_export_Plate 1 UNS LN_D3_D03_CD8p_CD8_live.fcs	RVm17_aIL10_12_UNS	aIL10	RVm17	twelve	aIL10_twelve	UNS	D03
997	Sample_42	15	1	0.00133333	NA	NA	NA	Sample_42	AI_export_Plate 1 UNS LN_D3_D03_CD8p_CD8_live.fcs	RVm17_aIL10_12_UNS	aIL10	RVm17	twelve	aIL10_twelve	UNS	D03
998	Sample_42	2	176	0.234667	4.55724	4.71621	2.47165	Sample_42	AI_export_Plate 1 UNS LN_D3_D03_CD8p_CD8_live.fcs	RVm17_aIL10_12_UNS	aIL10	RVm17	twelve	aIL10_twelve	UNS	D03
999	Sample_42	3	98	0.130667	3.69162	3.63346	1.96463	Sample_42	AI_export_Plate 1 UNS LN_D3_D03_CD8p_CD8_live.fcs	RVm17_aIL10_12_UNS	aIL10	RVm17	twelve	aIL10_twelve	UNS	D03
1000	Sample_42	4	57	0.076	NA	NA	NA	Sample_42	AI_export_Plate 1 UNS LN_D3_D03_CD8p_CD8_live.fcs	RVm17_aIL10_12_UNS	aIL10	RVm17	twelve	aIL10_twelve	UNS	D03
1001	Sample_42	5	106	0.141333	18.352	18.8394	2.43051	Sample_42	AI_export_Plate 1 UNS LN_D3_D03_CD8p_CD8_live.fcs	RVm17_aIL10_12_UNS	aIL10	RVm17	twelve	aIL10_twelve	UNS	D03
1002	Sample_42	6	16	0.0213333	NA	NA	NA	Sample_42	AI_export_Plate 1 UNS LN_D3_D03_CD8p_CD8_live.fcs	RVm17_aIL10_12_UNS	aIL10	RVm17	twelve	aIL10_twelve	UNS	D03
1003	Sample_42	7	15	0.02	19.5783	19.5961	0.0504224	Sample_42	AI_export_Plate 1 UNS LN_D3_D03_CD8p_CD8_live.fcs	RVm17_aIL10_12_UNS	aIL10	RVm17	twelve	aIL10_twelve	UNS	D03
1004	Sample_42	8	47	0.0626667	11.9979	11.9767	2.29694	Sample_42	AI_export_Plate 1 UNS LN_D3_D03_CD8p_CD8_live.fcs	RVm17_aIL10_12_UNS	aIL10	RVm17	twelve	aIL10_twelve	UNS	D03
1005	Sample_42	9	25	0.0333333	16.5409	15.9424	1.23228	Sample_42	AI_export_Plate 1 UNS LN_D3_D03_CD8p_CD8_live.fcs	RVm17_aIL10_12_UNS	aIL10	RVm17	twelve	aIL10_twelve	UNS	D03
1006	Sample_43	1	166	0.221333	22.1447	22.5578	2.479	Sample_43	AI_export_Plate 1 UNS LN_D4_D04_CD8p_CD8_live.fcs	RBe17_Control_12_UNS	Control	RBe17	twelve	Control_twelve	UNS	D04
1007	Sample_43	10	10	0.0133333	13.6888	14.258	3.64626	Sample_43	AI_export_Plate 1 UNS LN_D4_D04_CD8p_CD8_live.fcs	RBe17_Control_12_UNS	Control	RBe17	twelve	Control_twelve	UNS	D04
1008	Sample_43	11	30	0.04	18.6962	19.5483	3.57339	Sample_43	AI_export_Plate 1 UNS LN_D4_D04_CD8p_CD8_live.fcs	RBe17_Control_12_UNS	Control	RBe17	twelve	Control_twelve	UNS	D04
1009	Sample_43	12	11	0.0146667	9.84477	8.69682	2.85642	Sample_43	AI_export_Plate 1 UNS LN_D4_D04_CD8p_CD8_live.fcs	RBe17_Control_12_UNS	Control	RBe17	twelve	Control_twelve	UNS	D04
1010	Sample_43	13	6	0.008	17.9129	17.9129	NA	Sample_43	AI_export_Plate 1 UNS LN_D4_D04_CD8p_CD8_live.fcs	RBe17_Control_12_UNS	Control	RBe17	twelve	Control_twelve	UNS	D04
1011	Sample_43	14	1	0.00133333	NA	NA	NA	Sample_43	AI_export_Plate 1 UNS LN_D4_D04_CD8p_CD8_live.fcs	RBe17_Control_12_UNS	Control	RBe17	twelve	Control_twelve	UNS	D04
1012	Sample_43	15	1	0.00133333	9.34254	9.34254	NA	Sample_43	AI_export_Plate 1 UNS LN_D4_D04_CD8p_CD8_live.fcs	RBe17_Control_12_UNS	Control	RBe17	twelve	Control_twelve	UNS	D04
1013	Sample_43	2	178	0.237333	4.66641	4.71591	2.53869	Sample_43	AI_export_Plate 1 UNS LN_D4_D04_CD8p_CD8_live.fcs	RBe17_Control_12_UNS	Control	RBe17	twelve	Control_twelve	UNS	D04
1014	Sample_43	3	121	0.161333	3.77334	3.45084	1.98801	Sample_43	AI_export_Plate 1 UNS LN_D4_D04_CD8p_CD8_live.fcs	RBe17_Control_12_UNS	Control	RBe17	twelve	Control_twelve	UNS	D04
1015	Sample_43	4	31	0.0413333	NA	NA	NA	Sample_43	AI_export_Plate 1 UNS LN_D4_D04_CD8p_CD8_live.fcs	RBe17_Control_12_UNS	Control	RBe17	twelve	Control_twelve	UNS	D04
1016	Sample_43	5	91	0.121333	18.5923	18.7304	1.81125	Sample_43	AI_export_Plate 1 UNS LN_D4_D04_CD8p_CD8_live.fcs	RBe17_Control_12_UNS	Control	RBe17	twelve	Control_twelve	UNS	D04
1017	Sample_43	6	3	0.004	NA	NA	NA	Sample_43	AI_export_Plate 1 UNS LN_D4_D04_CD8p_CD8_live.fcs	RBe17_Control_12_UNS	Control	RBe17	twelve	Control_twelve	UNS	D04
1018	Sample_43	7	12	0.016	19.5804	19.5961	0.0365894	Sample_43	AI_export_Plate 1 UNS LN_D4_D04_CD8p_CD8_live.fcs	RBe17_Control_12_UNS	Control	RBe17	twelve	Control_twelve	UNS	D04
1019	Sample_43	8	60	0.08	12.4241	12.2376	3.33335	Sample_43	AI_export_Plate 1 UNS LN_D4_D04_CD8p_CD8_live.fcs	RBe17_Control_12_UNS	Control	RBe17	twelve	Control_twelve	UNS	D04
1020	Sample_43	9	29	0.0386667	15.7818	15.8914	1.86276	Sample_43	AI_export_Plate 1 UNS LN_D4_D04_CD8p_CD8_live.fcs	RBe17_Control_12_UNS	Control	RBe17	twelve	Control_twelve	UNS	D04
1021	Sample_44	1	135	0.18	21.6793	22.275	2.74097	Sample_44	AI_export_Plate 1 UNS LN_D5_D05_CD8p_CD8_live.fcs	RMl17_Control_12_UNS	Control	RMl17	twelve	Control_twelve	UNS	D05
1022	Sample_44	10	17	0.0226667	14.8348	15.5743	3.27127	Sample_44	AI_export_Plate 1 UNS LN_D5_D05_CD8p_CD8_live.fcs	RMl17_Control_12_UNS	Control	RMl17	twelve	Control_twelve	UNS	D05
1023	Sample_44	11	32	0.0426667	19.0403	19.5483	1.14956	Sample_44	AI_export_Plate 1 UNS LN_D5_D05_CD8p_CD8_live.fcs	RMl17_Control_12_UNS	Control	RMl17	twelve	Control_twelve	UNS	D05
1024	Sample_44	12	12	0.016	8.63509	8.24165	1.70072	Sample_44	AI_export_Plate 1 UNS LN_D5_D05_CD8p_CD8_live.fcs	RMl17_Control_12_UNS	Control	RMl17	twelve	Control_twelve	UNS	D05
1025	Sample_44	13	2	0.00266667	NA	NA	NA	Sample_44	AI_export_Plate 1 UNS LN_D5_D05_CD8p_CD8_live.fcs	RMl17_Control_12_UNS	Control	RMl17	twelve	Control_twelve	UNS	D05
1026	Sample_44	14	0	0	NA	NA	NA	Sample_44	AI_export_Plate 1 UNS LN_D5_D05_CD8p_CD8_live.fcs	RMl17_Control_12_UNS	Control	RMl17	twelve	Control_twelve	UNS	D05
1027	Sample_44	15	1	0.00133333	NA	NA	NA	Sample_44	AI_export_Plate 1 UNS LN_D5_D05_CD8p_CD8_live.fcs	RMl17_Control_12_UNS	Control	RMl17	twelve	Control_twelve	UNS	D05
1028	Sample_44	2	179	0.238667	4.21097	4.28015	2.50268	Sample_44	AI_export_Plate 1 UNS LN_D5_D05_CD8p_CD8_live.fcs	RMl17_Control_12_UNS	Control	RMl17	twelve	Control_twelve	UNS	D05
1029	Sample_44	3	114	0.152	4.04909	3.66676	2.81794	Sample_44	AI_export_Plate 1 UNS LN_D5_D05_CD8p_CD8_live.fcs	RMl17_Control_12_UNS	Control	RMl17	twelve	Control_twelve	UNS	D05
1030	Sample_44	4	60	0.08	7.1103	7.1103	NA	Sample_44	AI_export_Plate 1 UNS LN_D5_D05_CD8p_CD8_live.fcs	RMl17_Control_12_UNS	Control	RMl17	twelve	Control_twelve	UNS	D05
1031	Sample_44	5	77	0.102667	18.2721	18.4276	1.61099	Sample_44	AI_export_Plate 1 UNS LN_D5_D05_CD8p_CD8_live.fcs	RMl17_Control_12_UNS	Control	RMl17	twelve	Control_twelve	UNS	D05
1032	Sample_44	6	20	0.0266667	NA	NA	NA	Sample_44	AI_export_Plate 1 UNS LN_D5_D05_CD8p_CD8_live.fcs	RMl17_Control_12_UNS	Control	RMl17	twelve	Control_twelve	UNS	D05
1033	Sample_44	7	15	0.02	19.5541	19.5961	0.129895	Sample_44	AI_export_Plate 1 UNS LN_D5_D05_CD8p_CD8_live.fcs	RMl17_Control_12_UNS	Control	RMl17	twelve	Control_twelve	UNS	D05
1034	Sample_44	8	52	0.0693333	12.2087	12.2376	2.41555	Sample_44	AI_export_Plate 1 UNS LN_D5_D05_CD8p_CD8_live.fcs	RMl17_Control_12_UNS	Control	RMl17	twelve	Control_twelve	UNS	D05
1035	Sample_44	9	34	0.0453333	16.2189	15.8914	2.86328	Sample_44	AI_export_Plate 1 UNS LN_D5_D05_CD8p_CD8_live.fcs	RMl17_Control_12_UNS	Control	RMl17	twelve	Control_twelve	UNS	D05
1036	Sample_45	1	126	0.168	22.1014	22.8974	2.94591	Sample_45	AI_export_Plate 1 UNS LN_D6_D06_CD8p_CD8_live.fcs	RIb17_aIL10+aPD1_12_UNS	aIL10+aPD1	RIb17	twelve	aIL10+aPD1_twelve	UNS	D06
1037	Sample_45	10	7	0.00933333	14.6931	15.1143	2.69663	Sample_45	AI_export_Plate 1 UNS LN_D6_D06_CD8p_CD8_live.fcs	RIb17_aIL10+aPD1_12_UNS	aIL10+aPD1	RIb17	twelve	aIL10+aPD1_twelve	UNS	D06
1038	Sample_45	11	26	0.0346667	18.4012	19.5483	3.32857	Sample_45	AI_export_Plate 1 UNS LN_D6_D06_CD8p_CD8_live.fcs	RIb17_aIL10+aPD1_12_UNS	aIL10+aPD1	RIb17	twelve	aIL10+aPD1_twelve	UNS	D06
1039	Sample_45	12	11	0.0146667	8.38422	8.29481	0.372391	Sample_45	AI_export_Plate 1 UNS LN_D6_D06_CD8p_CD8_live.fcs	RIb17_aIL10+aPD1_12_UNS	aIL10+aPD1	RIb17	twelve	aIL10+aPD1_twelve	UNS	D06
1040	Sample_45	13	12	0.016	NA	NA	NA	Sample_45	AI_export_Plate 1 UNS LN_D6_D06_CD8p_CD8_live.fcs	RIb17_aIL10+aPD1_12_UNS	aIL10+aPD1	RIb17	twelve	aIL10+aPD1_twelve	UNS	D06
1041	Sample_45	14	0	0	NA	NA	NA	Sample_45	AI_export_Plate 1 UNS LN_D6_D06_CD8p_CD8_live.fcs	RIb17_aIL10+aPD1_12_UNS	aIL10+aPD1	RIb17	twelve	aIL10+aPD1_twelve	UNS	D06
1042	Sample_45	15	2	0.00266667	9.04525	9.04525	NA	Sample_45	AI_export_Plate 1 UNS LN_D6_D06_CD8p_CD8_live.fcs	RIb17_aIL10+aPD1_12_UNS	aIL10+aPD1	RIb17	twelve	aIL10+aPD1_twelve	UNS	D06
1043	Sample_45	2	129	0.172	4.12127	4.17907	1.98951	Sample_45	AI_export_Plate 1 UNS LN_D6_D06_CD8p_CD8_live.fcs	RIb17_aIL10+aPD1_12_UNS	aIL10+aPD1	RIb17	twelve	aIL10+aPD1_twelve	UNS	D06
1044	Sample_45	3	174	0.232	3.7664	3.66676	1.61051	Sample_45	AI_export_Plate 1 UNS LN_D6_D06_CD8p_CD8_live.fcs	RIb17_aIL10+aPD1_12_UNS	aIL10+aPD1	RIb17	twelve	aIL10+aPD1_twelve	UNS	D06
1045	Sample_45	4	89	0.118667	NA	NA	NA	Sample_45	AI_export_Plate 1 UNS LN_D6_D06_CD8p_CD8_live.fcs	RIb17_aIL10+aPD1_12_UNS	aIL10+aPD1	RIb17	twelve	aIL10+aPD1_twelve	UNS	D06
1046	Sample_45	5	46	0.0613333	18.8307	18.9426	1.02292	Sample_45	AI_export_Plate 1 UNS LN_D6_D06_CD8p_CD8_live.fcs	RIb17_aIL10+aPD1_12_UNS	aIL10+aPD1	RIb17	twelve	aIL10+aPD1_twelve	UNS	D06
1047	Sample_45	6	40	0.0533333	NA	NA	NA	Sample_45	AI_export_Plate 1 UNS LN_D6_D06_CD8p_CD8_live.fcs	RIb17_aIL10+aPD1_12_UNS	aIL10+aPD1	RIb17	twelve	aIL10+aPD1_twelve	UNS	D06
1048	Sample_45	7	17	0.0226667	19.532	19.5961	0.163071	Sample_45	AI_export_Plate 1 UNS LN_D6_D06_CD8p_CD8_live.fcs	RIb17_aIL10+aPD1_12_UNS	aIL10+aPD1	RIb17	twelve	aIL10+aPD1_twelve	UNS	D06
1049	Sample_45	8	44	0.0586667	11.1386	11.3596	1.36171	Sample_45	AI_export_Plate 1 UNS LN_D6_D06_CD8p_CD8_live.fcs	RIb17_aIL10+aPD1_12_UNS	aIL10+aPD1	RIb17	twelve	aIL10+aPD1_twelve	UNS	D06
1050	Sample_45	9	27	0.036	15.8717	15.8914	0.820823	Sample_45	AI_export_Plate 1 UNS LN_D6_D06_CD8p_CD8_live.fcs	RIb17_aIL10+aPD1_12_UNS	aIL10+aPD1	RIb17	twelve	aIL10+aPD1_twelve	UNS	D06
1051	Sample_46	1	105	0.14	21.807	22.0537	2.43785	Sample_46	AI_export_Plate 1 UNS LN_D7_D07_CD8p_CD8_live.fcs	RFl17_aIL10+aPD1_21_UNS	aIL10+aPD1	RFl17	twenty_one	aIL10+aPD1_twenty_one	UNS	D07
1052	Sample_46	10	18	0.024	15.9024	16.6862	2.48051	Sample_46	AI_export_Plate 1 UNS LN_D7_D07_CD8p_CD8_live.fcs	RFl17_aIL10+aPD1_21_UNS	aIL10+aPD1	RFl17	twenty_one	aIL10+aPD1_twenty_one	UNS	D07
1053	Sample_46	11	19	0.0253333	19.0596	19.5483	1.02353	Sample_46	AI_export_Plate 1 UNS LN_D7_D07_CD8p_CD8_live.fcs	RFl17_aIL10+aPD1_21_UNS	aIL10+aPD1	RFl17	twenty_one	aIL10+aPD1_twenty_one	UNS	D07
1054	Sample_46	12	13	0.0173333	8.66566	8.43627	0.554638	Sample_46	AI_export_Plate 1 UNS LN_D7_D07_CD8p_CD8_live.fcs	RFl17_aIL10+aPD1_21_UNS	aIL10+aPD1	RFl17	twenty_one	aIL10+aPD1_twenty_one	UNS	D07
1055	Sample_46	13	11	0.0146667	NA	NA	NA	Sample_46	AI_export_Plate 1 UNS LN_D7_D07_CD8p_CD8_live.fcs	RFl17_aIL10+aPD1_21_UNS	aIL10+aPD1	RFl17	twenty_one	aIL10+aPD1_twenty_one	UNS	D07
1056	Sample_46	14	0	0	NA	NA	NA	Sample_46	AI_export_Plate 1 UNS LN_D7_D07_CD8p_CD8_live.fcs	RFl17_aIL10+aPD1_21_UNS	aIL10+aPD1	RFl17	twenty_one	aIL10+aPD1_twenty_one	UNS	D07
1057	Sample_46	15	1	0.00133333	9.34254	9.34254	NA	Sample_46	AI_export_Plate 1 UNS LN_D7_D07_CD8p_CD8_live.fcs	RFl17_aIL10+aPD1_21_UNS	aIL10+aPD1	RFl17	twenty_one	aIL10+aPD1_twenty_one	UNS	D07
1058	Sample_46	2	168	0.224	4.20738	4.52145	1.95852	Sample_46	AI_export_Plate 1 UNS LN_D7_D07_CD8p_CD8_live.fcs	RFl17_aIL10+aPD1_21_UNS	aIL10+aPD1	RFl17	twenty_one	aIL10+aPD1_twenty_one	UNS	D07
1059	Sample_46	3	109	0.145333	3.69758	3.59311	1.59663	Sample_46	AI_export_Plate 1 UNS LN_D7_D07_CD8p_CD8_live.fcs	RFl17_aIL10+aPD1_21_UNS	aIL10+aPD1	RFl17	twenty_one	aIL10+aPD1_twenty_one	UNS	D07
1060	Sample_46	4	86	0.114667	NA	NA	NA	Sample_46	AI_export_Plate 1 UNS LN_D7_D07_CD8p_CD8_live.fcs	RFl17_aIL10+aPD1_21_UNS	aIL10+aPD1	RFl17	twenty_one	aIL10+aPD1_twenty_one	UNS	D07
1061	Sample_46	5	77	0.102667	18.3692	18.8225	2.22954	Sample_46	AI_export_Plate 1 UNS LN_D7_D07_CD8p_CD8_live.fcs	RFl17_aIL10+aPD1_21_UNS	aIL10+aPD1	RFl17	twenty_one	aIL10+aPD1_twenty_one	UNS	D07
1062	Sample_46	6	31	0.0413333	19.1091	19.1091	NA	Sample_46	AI_export_Plate 1 UNS LN_D7_D07_CD8p_CD8_live.fcs	RFl17_aIL10+aPD1_21_UNS	aIL10+aPD1	RFl17	twenty_one	aIL10+aPD1_twenty_one	UNS	D07
1063	Sample_46	7	20	0.0266667	19.4335	19.572	0.350292	Sample_46	AI_export_Plate 1 UNS LN_D7_D07_CD8p_CD8_live.fcs	RFl17_aIL10+aPD1_21_UNS	aIL10+aPD1	RFl17	twenty_one	aIL10+aPD1_twenty_one	UNS	D07
1064	Sample_46	8	62	0.0826667	11.7075	11.7838	1.32221	Sample_46	AI_export_Plate 1 UNS LN_D7_D07_CD8p_CD8_live.fcs	RFl17_aIL10+aPD1_21_UNS	aIL10+aPD1	RFl17	twenty_one	aIL10+aPD1_twenty_one	UNS	D07
1065	Sample_46	9	30	0.04	15.8355	15.8914	1.42732	Sample_46	AI_export_Plate 1 UNS LN_D7_D07_CD8p_CD8_live.fcs	RFl17_aIL10+aPD1_21_UNS	aIL10+aPD1	RFl17	twenty_one	aIL10+aPD1_twenty_one	UNS	D07
1066	Sample_47	1	84	0.112	21.2539	21.7313	3.26915	Sample_47	AI_export_Plate 1 UNS LN_D8_D08_CD8p_CD8_live.fcs	RYk17_aIL10_21_UNS	aIL10	RYk17	twenty_one	aIL10_twenty_one	UNS	D08
1067	Sample_47	10	29	0.0386667	13.9962	15.2433	3.72458	Sample_47	AI_export_Plate 1 UNS LN_D8_D08_CD8p_CD8_live.fcs	RYk17_aIL10_21_UNS	aIL10	RYk17	twenty_one	aIL10_twenty_one	UNS	D08
1068	Sample_47	11	24	0.032	18.9415	19.5483	1.14114	Sample_47	AI_export_Plate 1 UNS LN_D8_D08_CD8p_CD8_live.fcs	RYk17_aIL10_21_UNS	aIL10	RYk17	twenty_one	aIL10_twenty_one	UNS	D08
1069	Sample_47	12	26	0.0346667	8.76213	8.35147	1.66532	Sample_47	AI_export_Plate 1 UNS LN_D8_D08_CD8p_CD8_live.fcs	RYk17_aIL10_21_UNS	aIL10	RYk17	twenty_one	aIL10_twenty_one	UNS	D08
1070	Sample_47	13	14	0.0186667	12.2376	12.2376	NA	Sample_47	AI_export_Plate 1 UNS LN_D8_D08_CD8p_CD8_live.fcs	RYk17_aIL10_21_UNS	aIL10	RYk17	twenty_one	aIL10_twenty_one	UNS	D08
1071	Sample_47	14	0	0	NA	NA	NA	Sample_47	AI_export_Plate 1 UNS LN_D8_D08_CD8p_CD8_live.fcs	RYk17_aIL10_21_UNS	aIL10	RYk17	twenty_one	aIL10_twenty_one	UNS	D08
1072	Sample_47	15	1	0.00133333	9.04525	9.04525	NA	Sample_47	AI_export_Plate 1 UNS LN_D8_D08_CD8p_CD8_live.fcs	RYk17_aIL10_21_UNS	aIL10	RYk17	twenty_one	aIL10_twenty_one	UNS	D08
1073	Sample_47	2	175	0.233333	4.81562	4.71618	2.53191	Sample_47	AI_export_Plate 1 UNS LN_D8_D08_CD8p_CD8_live.fcs	RYk17_aIL10_21_UNS	aIL10	RYk17	twenty_one	aIL10_twenty_one	UNS	D08
1074	Sample_47	3	164	0.218667	3.98493	3.47289	2.61625	Sample_47	AI_export_Plate 1 UNS LN_D8_D08_CD8p_CD8_live.fcs	RYk17_aIL10_21_UNS	aIL10	RYk17	twenty_one	aIL10_twenty_one	UNS	D08
1075	Sample_47	4	41	0.0546667	NA	NA	NA	Sample_47	AI_export_Plate 1 UNS LN_D8_D08_CD8p_CD8_live.fcs	RYk17_aIL10_21_UNS	aIL10	RYk17	twenty_one	aIL10_twenty_one	UNS	D08
1076	Sample_47	5	65	0.0866667	18.2776	18.9397	2.50125	Sample_47	AI_export_Plate 1 UNS LN_D8_D08_CD8p_CD8_live.fcs	RYk17_aIL10_21_UNS	aIL10	RYk17	twenty_one	aIL10_twenty_one	UNS	D08
1077	Sample_47	6	11	0.0146667	NA	NA	NA	Sample_47	AI_export_Plate 1 UNS LN_D8_D08_CD8p_CD8_live.fcs	RYk17_aIL10_21_UNS	aIL10	RYk17	twenty_one	aIL10_twenty_one	UNS	D08
1078	Sample_47	7	15	0.02	19.3039	19.5188	0.375333	Sample_47	AI_export_Plate 1 UNS LN_D8_D08_CD8p_CD8_live.fcs	RYk17_aIL10_21_UNS	aIL10	RYk17	twenty_one	aIL10_twenty_one	UNS	D08
1079	Sample_47	8	65	0.0866667	11.2746	11.297	1.68374	Sample_47	AI_export_Plate 1 UNS LN_D8_D08_CD8p_CD8_live.fcs	RYk17_aIL10_21_UNS	aIL10	RYk17	twenty_one	aIL10_twenty_one	UNS	D08
1080	Sample_47	9	36	0.048	15.9628	15.8914	2.01738	Sample_47	AI_export_Plate 1 UNS LN_D8_D08_CD8p_CD8_live.fcs	RYk17_aIL10_21_UNS	aIL10	RYk17	twenty_one	aIL10_twenty_one	UNS	D08
1081	Sample_48	1	98	0.130667	21.9463	21.7932	2.15648	Sample_48	AI_export_Plate 1 UNS LN_D9_D09_CD8p_CD8_live.fcs	RVz16_Control_21_UNS	Control	RVz16	twenty_one	Control_twenty_one	UNS	D09
1082	Sample_48	10	25	0.0333333	15.1884	15.7355	3.6639	Sample_48	AI_export_Plate 1 UNS LN_D9_D09_CD8p_CD8_live.fcs	RVz16_Control_21_UNS	Control	RVz16	twenty_one	Control_twenty_one	UNS	D09
1083	Sample_48	11	19	0.0253333	18.7576	19.5483	2.81528	Sample_48	AI_export_Plate 1 UNS LN_D9_D09_CD8p_CD8_live.fcs	RVz16_Control_21_UNS	Control	RVz16	twenty_one	Control_twenty_one	UNS	D09
1084	Sample_48	12	15	0.02	9.19689	9.0326	1.95475	Sample_48	AI_export_Plate 1 UNS LN_D9_D09_CD8p_CD8_live.fcs	RVz16_Control_21_UNS	Control	RVz16	twenty_one	Control_twenty_one	UNS	D09
1085	Sample_48	13	10	0.0133333	NA	NA	NA	Sample_48	AI_export_Plate 1 UNS LN_D9_D09_CD8p_CD8_live.fcs	RVz16_Control_21_UNS	Control	RVz16	twenty_one	Control_twenty_one	UNS	D09
1086	Sample_48	14	1	0.00133333	0.56396	0.56396	NA	Sample_48	AI_export_Plate 1 UNS LN_D9_D09_CD8p_CD8_live.fcs	RVz16_Control_21_UNS	Control	RVz16	twenty_one	Control_twenty_one	UNS	D09
1087	Sample_48	15	3	0.004	9.34254	9.34254	1.72434e-09	Sample_48	AI_export_Plate 1 UNS LN_D9_D09_CD8p_CD8_live.fcs	RVz16_Control_21_UNS	Control	RVz16	twenty_one	Control_twenty_one	UNS	D09
1088	Sample_48	2	160	0.213333	4.99808	4.71621	2.80933	Sample_48	AI_export_Plate 1 UNS LN_D9_D09_CD8p_CD8_live.fcs	RVz16_Control_21_UNS	Control	RVz16	twenty_one	Control_twenty_one	UNS	D09
1089	Sample_48	3	152	0.202667	3.92832	3.46912	3.24852	Sample_48	AI_export_Plate 1 UNS LN_D9_D09_CD8p_CD8_live.fcs	RVz16_Control_21_UNS	Control	RVz16	twenty_one	Control_twenty_one	UNS	D09
1090	Sample_48	4	94	0.125333	11.7791	11.7791	NA	Sample_48	AI_export_Plate 1 UNS LN_D9_D09_CD8p_CD8_live.fcs	RVz16_Control_21_UNS	Control	RVz16	twenty_one	Control_twenty_one	UNS	D09
1091	Sample_48	5	47	0.0626667	18.2557	18.5275	2.50728	Sample_48	AI_export_Plate 1 UNS LN_D9_D09_CD8p_CD8_live.fcs	RVz16_Control_21_UNS	Control	RVz16	twenty_one	Control_twenty_one	UNS	D09
1092	Sample_48	6	31	0.0413333	NA	NA	NA	Sample_48	AI_export_Plate 1 UNS LN_D9_D09_CD8p_CD8_live.fcs	RVz16_Control_21_UNS	Control	RVz16	twenty_one	Control_twenty_one	UNS	D09
1093	Sample_48	7	12	0.016	19.5572	19.5961	0.154968	Sample_48	AI_export_Plate 1 UNS LN_D9_D09_CD8p_CD8_live.fcs	RVz16_Control_21_UNS	Control	RVz16	twenty_one	Control_twenty_one	UNS	D09
1094	Sample_48	8	43	0.0573333	11.0011	11.2536	1.21086	Sample_48	AI_export_Plate 1 UNS LN_D9_D09_CD8p_CD8_live.fcs	RVz16_Control_21_UNS	Control	RVz16	twenty_one	Control_twenty_one	UNS	D09
1095	Sample_48	9	40	0.0533333	16.0785	15.8914	0.985197	Sample_48	AI_export_Plate 1 UNS LN_D9_D09_CD8p_CD8_live.fcs	RVz16_Control_21_UNS	Control	RVz16	twenty_one	Control_twenty_one	UNS	D09
1096	Sample_49	1	91	0.121333	21.7582	21.9751	2.01132	Sample_49	AI_export_Plate 1 UNS LN_E1_E01_CD8p_CD8_live.fcs	RTd17_Control_21_UNS	Control	RTd17	twenty_one	Control_twenty_one	UNS	E01
1097	Sample_49	10	38	0.0506667	16.3907	16.2614	1.096	Sample_49	AI_export_Plate 1 UNS LN_E1_E01_CD8p_CD8_live.fcs	RTd17_Control_21_UNS	Control	RTd17	twenty_one	Control_twenty_one	UNS	E01
1098	Sample_49	11	51	0.068	18.267	19.5483	4.02857	Sample_49	AI_export_Plate 1 UNS LN_E1_E01_CD8p_CD8_live.fcs	RTd17_Control_21_UNS	Control	RTd17	twenty_one	Control_twenty_one	UNS	E01
1099	Sample_49	12	7	0.00933333	11.5819	9.43453	4.68739	Sample_49	AI_export_Plate 1 UNS LN_E1_E01_CD8p_CD8_live.fcs	RTd17_Control_21_UNS	Control	RTd17	twenty_one	Control_twenty_one	UNS	E01
1100	Sample_49	13	45	0.06	17.0604	17.0604	NA	Sample_49	AI_export_Plate 1 UNS LN_E1_E01_CD8p_CD8_live.fcs	RTd17_Control_21_UNS	Control	RTd17	twenty_one	Control_twenty_one	UNS	E01
1101	Sample_49	14	0	0	NA	NA	NA	Sample_49	AI_export_Plate 1 UNS LN_E1_E01_CD8p_CD8_live.fcs	RTd17_Control_21_UNS	Control	RTd17	twenty_one	Control_twenty_one	UNS	E01
1102	Sample_49	15	4	0.00533333	19.6231	24.7633	8.90318	Sample_49	AI_export_Plate 1 UNS LN_E1_E01_CD8p_CD8_live.fcs	RTd17_Control_21_UNS	Control	RTd17	twenty_one	Control_twenty_one	UNS	E01
1103	Sample_49	2	47	0.0626667	3.80158	4.09423	2.12397	Sample_49	AI_export_Plate 1 UNS LN_E1_E01_CD8p_CD8_live.fcs	RTd17_Control_21_UNS	Control	RTd17	twenty_one	Control_twenty_one	UNS	E01
1104	Sample_49	3	35	0.0466667	5.42708	3.80926	5.13595	Sample_49	AI_export_Plate 1 UNS LN_E1_E01_CD8p_CD8_live.fcs	RTd17_Control_21_UNS	Control	RTd17	twenty_one	Control_twenty_one	UNS	E01
1105	Sample_49	4	205	0.273333	19.2006	19.2006	NA	Sample_49	AI_export_Plate 1 UNS LN_E1_E01_CD8p_CD8_live.fcs	RTd17_Control_21_UNS	Control	RTd17	twenty_one	Control_twenty_one	UNS	E01
1106	Sample_49	5	66	0.088	18.5973	18.7696	1.12419	Sample_49	AI_export_Plate 1 UNS LN_E1_E01_CD8p_CD8_live.fcs	RTd17_Control_21_UNS	Control	RTd17	twenty_one	Control_twenty_one	UNS	E01
1107	Sample_49	6	74	0.0986667	NA	NA	NA	Sample_49	AI_export_Plate 1 UNS LN_E1_E01_CD8p_CD8_live.fcs	RTd17_Control_21_UNS	Control	RTd17	twenty_one	Control_twenty_one	UNS	E01
1108	Sample_49	7	31	0.0413333	19.6012	19.5961	0.740827	Sample_49	AI_export_Plate 1 UNS LN_E1_E01_CD8p_CD8_live.fcs	RTd17_Control_21_UNS	Control	RTd17	twenty_one	Control_twenty_one	UNS	E01
1109	Sample_49	8	28	0.0373333	11.515	11.7297	1.9104	Sample_49	AI_export_Plate 1 UNS LN_E1_E01_CD8p_CD8_live.fcs	RTd17_Control_21_UNS	Control	RTd17	twenty_one	Control_twenty_one	UNS	E01
1110	Sample_49	9	28	0.0373333	15.6097	15.5924	1.72415	Sample_49	AI_export_Plate 1 UNS LN_E1_E01_CD8p_CD8_live.fcs	RTd17_Control_21_UNS	Control	RTd17	twenty_one	Control_twenty_one	UNS	E01
1111	Sample_5	1	72	0.096	21.7227	23.3026	3.99552	Sample_5	AI_export_Plate 1 UNS LN_A2_A02_CD8p_CD8_live.fcs	RYk17_aIL10_-1_UNS	aIL10	RYk17	minus_one	aIL10_minus_one	UNS	A02
1112	Sample_5	10	14	0.0186667	14.3575	15.5743	5.02503	Sample_5	AI_export_Plate 1 UNS LN_A2_A02_CD8p_CD8_live.fcs	RYk17_aIL10_-1_UNS	aIL10	RYk17	minus_one	aIL10_minus_one	UNS	A02
1113	Sample_5	11	15	0.02	18.1452	19.5483	4.07932	Sample_5	AI_export_Plate 1 UNS LN_A2_A02_CD8p_CD8_live.fcs	RYk17_aIL10_-1_UNS	aIL10	RYk17	minus_one	aIL10_minus_one	UNS	A02
1114	Sample_5	12	24	0.032	8.64465	8.37373	0.60122	Sample_5	AI_export_Plate 1 UNS LN_A2_A02_CD8p_CD8_live.fcs	RYk17_aIL10_-1_UNS	aIL10	RYk17	minus_one	aIL10_minus_one	UNS	A02
1115	Sample_5	13	8	0.0106667	12.2376	12.2376	NA	Sample_5	AI_export_Plate 1 UNS LN_A2_A02_CD8p_CD8_live.fcs	RYk17_aIL10_-1_UNS	aIL10	RYk17	minus_one	aIL10_minus_one	UNS	A02
1116	Sample_5	14	0	0	NA	NA	NA	Sample_5	AI_export_Plate 1 UNS LN_A2_A02_CD8p_CD8_live.fcs	RYk17_aIL10_-1_UNS	aIL10	RYk17	minus_one	aIL10_minus_one	UNS	A02
1117	Sample_5	15	1	0.00133333	24.7633	24.7633	NA	Sample_5	AI_export_Plate 1 UNS LN_A2_A02_CD8p_CD8_live.fcs	RYk17_aIL10_-1_UNS	aIL10	RYk17	minus_one	aIL10_minus_one	UNS	A02
1118	Sample_5	2	277	0.369333	5.12506	5.03482	2.38338	Sample_5	AI_export_Plate 1 UNS LN_A2_A02_CD8p_CD8_live.fcs	RYk17_aIL10_-1_UNS	aIL10	RYk17	minus_one	aIL10_minus_one	UNS	A02
1119	Sample_5	3	138	0.184	3.87046	3.66676	2.4678	Sample_5	AI_export_Plate 1 UNS LN_A2_A02_CD8p_CD8_live.fcs	RYk17_aIL10_-1_UNS	aIL10	RYk17	minus_one	aIL10_minus_one	UNS	A02
1120	Sample_5	4	57	0.076	NA	NA	NA	Sample_5	AI_export_Plate 1 UNS LN_A2_A02_CD8p_CD8_live.fcs	RYk17_aIL10_-1_UNS	aIL10	RYk17	minus_one	aIL10_minus_one	UNS	A02
1121	Sample_5	5	53	0.0706667	18.5403	18.6139	1.32559	Sample_5	AI_export_Plate 1 UNS LN_A2_A02_CD8p_CD8_live.fcs	RYk17_aIL10_-1_UNS	aIL10	RYk17	minus_one	aIL10_minus_one	UNS	A02
1122	Sample_5	6	8	0.0106667	NA	NA	NA	Sample_5	AI_export_Plate 1 UNS LN_A2_A02_CD8p_CD8_live.fcs	RYk17_aIL10_-1_UNS	aIL10	RYk17	minus_one	aIL10_minus_one	UNS	A02
1123	Sample_5	7	10	0.0133333	19.5459	19.5961	0.0800575	Sample_5	AI_export_Plate 1 UNS LN_A2_A02_CD8p_CD8_live.fcs	RYk17_aIL10_-1_UNS	aIL10	RYk17	minus_one	aIL10_minus_one	UNS	A02
1124	Sample_5	8	44	0.0586667	11.3618	11.309	1.35766	Sample_5	AI_export_Plate 1 UNS LN_A2_A02_CD8p_CD8_live.fcs	RYk17_aIL10_-1_UNS	aIL10	RYk17	minus_one	aIL10_minus_one	UNS	A02
1125	Sample_5	9	29	0.0386667	15.7593	15.8034	1.25652	Sample_5	AI_export_Plate 1 UNS LN_A2_A02_CD8p_CD8_live.fcs	RYk17_aIL10_-1_UNS	aIL10	RYk17	minus_one	aIL10_minus_one	UNS	A02
1126	Sample_50	1	96	0.128	21.2527	21.8685	3.41966	Sample_50	AI_export_Plate 1 UNS LN_E10_E10_CD8p_CD8_live.fcs	RYk17_aIL10_36_UNS	aIL10	RYk17	thirty_six	aIL10_thirty_six	UNS	E10
1127	Sample_50	10	29	0.0386667	15.0379	15.5743	2.92206	Sample_50	AI_export_Plate 1 UNS LN_E10_E10_CD8p_CD8_live.fcs	RYk17_aIL10_36_UNS	aIL10	RYk17	thirty_six	aIL10_thirty_six	UNS	E10
1128	Sample_50	11	19	0.0253333	18.572	19.5483	3.36032	Sample_50	AI_export_Plate 1 UNS LN_E10_E10_CD8p_CD8_live.fcs	RYk17_aIL10_36_UNS	aIL10	RYk17	thirty_six	aIL10_thirty_six	UNS	E10
1129	Sample_50	12	17	0.0226667	9.19105	8.40946	2.09182	Sample_50	AI_export_Plate 1 UNS LN_E10_E10_CD8p_CD8_live.fcs	RYk17_aIL10_36_UNS	aIL10	RYk17	thirty_six	aIL10_thirty_six	UNS	E10
1130	Sample_50	13	20	0.0266667	17.5335	17.5335	NA	Sample_50	AI_export_Plate 1 UNS LN_E10_E10_CD8p_CD8_live.fcs	RYk17_aIL10_36_UNS	aIL10	RYk17	thirty_six	aIL10_thirty_six	UNS	E10
1131	Sample_50	14	3	0.004	0.56396	0.56396	1.72434e-09	Sample_50	AI_export_Plate 1 UNS LN_E10_E10_CD8p_CD8_live.fcs	RYk17_aIL10_36_UNS	aIL10	RYk17	thirty_six	aIL10_thirty_six	UNS	E10
1132	Sample_50	15	0	0	NA	NA	NA	Sample_50	AI_export_Plate 1 UNS LN_E10_E10_CD8p_CD8_live.fcs	RYk17_aIL10_36_UNS	aIL10	RYk17	thirty_six	aIL10_thirty_six	UNS	E10
1133	Sample_50	2	145	0.193333	4.76509	4.52145	3.2631	Sample_50	AI_export_Plate 1 UNS LN_E10_E10_CD8p_CD8_live.fcs	RYk17_aIL10_36_UNS	aIL10	RYk17	thirty_six	aIL10_thirty_six	UNS	E10
1134	Sample_50	3	104	0.138667	3.61243	3.60519	1.727	Sample_50	AI_export_Plate 1 UNS LN_E10_E10_CD8p_CD8_live.fcs	RYk17_aIL10_36_UNS	aIL10	RYk17	thirty_six	aIL10_thirty_six	UNS	E10
1135	Sample_50	4	114	0.152	15.4955	15.4955	NA	Sample_50	AI_export_Plate 1 UNS LN_E10_E10_CD8p_CD8_live.fcs	RYk17_aIL10_36_UNS	aIL10	RYk17	thirty_six	aIL10_thirty_six	UNS	E10
1136	Sample_50	5	70	0.0933333	18.6585	19.0003	1.68638	Sample_50	AI_export_Plate 1 UNS LN_E10_E10_CD8p_CD8_live.fcs	RYk17_aIL10_36_UNS	aIL10	RYk17	thirty_six	aIL10_thirty_six	UNS	E10
1137	Sample_50	6	20	0.0266667	NA	NA	NA	Sample_50	AI_export_Plate 1 UNS LN_E10_E10_CD8p_CD8_live.fcs	RYk17_aIL10_36_UNS	aIL10	RYk17	thirty_six	aIL10_thirty_six	UNS	E10
1138	Sample_50	7	22	0.0293333	19.7066	19.596	0.547662	Sample_50	AI_export_Plate 1 UNS LN_E10_E10_CD8p_CD8_live.fcs	RYk17_aIL10_36_UNS	aIL10	RYk17	thirty_six	aIL10_thirty_six	UNS	E10
1139	Sample_50	8	60	0.08	11.7869	11.7544	2.36727	Sample_50	AI_export_Plate 1 UNS LN_E10_E10_CD8p_CD8_live.fcs	RYk17_aIL10_36_UNS	aIL10	RYk17	thirty_six	aIL10_thirty_six	UNS	E10
1140	Sample_50	9	31	0.0413333	15.6832	15.8914	1.16836	Sample_50	AI_export_Plate 1 UNS LN_E10_E10_CD8p_CD8_live.fcs	RYk17_aIL10_36_UNS	aIL10	RYk17	thirty_six	aIL10_thirty_six	UNS	E10
1141	Sample_51	1	154	0.205333	21.8092	22.0514	2.18791	Sample_51	AI_export_Plate 1 UNS LN_E11_E11_CD8p_CD8_live.fcs	RVz16_Control_36_UNS	Control	RVz16	thirty_six	Control_thirty_six	UNS	E11
1142	Sample_51	10	20	0.0266667	16.0123	17.4564	3.04564	Sample_51	AI_export_Plate 1 UNS LN_E11_E11_CD8p_CD8_live.fcs	RVz16_Control_36_UNS	Control	RVz16	thirty_six	Control_thirty_six	UNS	E11
1143	Sample_51	11	16	0.0213333	18.2668	19.5483	4.08513	Sample_51	AI_export_Plate 1 UNS LN_E11_E11_CD8p_CD8_live.fcs	RVz16_Control_36_UNS	Control	RVz16	thirty_six	Control_thirty_six	UNS	E11
1144	Sample_51	12	11	0.0146667	9.04867	8.40946	1.53007	Sample_51	AI_export_Plate 1 UNS LN_E11_E11_CD8p_CD8_live.fcs	RVz16_Control_36_UNS	Control	RVz16	thirty_six	Control_thirty_six	UNS	E11
1145	Sample_51	13	9	0.012	NA	NA	NA	Sample_51	AI_export_Plate 1 UNS LN_E11_E11_CD8p_CD8_live.fcs	RVz16_Control_36_UNS	Control	RVz16	thirty_six	Control_thirty_six	UNS	E11
1146	Sample_51	14	0	0	NA	NA	NA	Sample_51	AI_export_Plate 1 UNS LN_E11_E11_CD8p_CD8_live.fcs	RVz16_Control_36_UNS	Control	RVz16	thirty_six	Control_thirty_six	UNS	E11
1147	Sample_51	15	0	0	NA	NA	NA	Sample_51	AI_export_Plate 1 UNS LN_E11_E11_CD8p_CD8_live.fcs	RVz16_Control_36_UNS	Control	RVz16	thirty_six	Control_thirty_six	UNS	E11
1148	Sample_51	2	201	0.268	4.05444	3.76652	2.32414	Sample_51	AI_export_Plate 1 UNS LN_E11_E11_CD8p_CD8_live.fcs	RVz16_Control_36_UNS	Control	RVz16	thirty_six	Control_thirty_six	UNS	E11
1149	Sample_51	3	104	0.138667	3.94653	3.66676	1.64261	Sample_51	AI_export_Plate 1 UNS LN_E11_E11_CD8p_CD8_live.fcs	RVz16_Control_36_UNS	Control	RVz16	thirty_six	Control_thirty_six	UNS	E11
1150	Sample_51	4	72	0.096	NA	NA	NA	Sample_51	AI_export_Plate 1 UNS LN_E11_E11_CD8p_CD8_live.fcs	RVz16_Control_36_UNS	Control	RVz16	thirty_six	Control_thirty_six	UNS	E11
1151	Sample_51	5	76	0.101333	18.7905	18.9397	1.84876	Sample_51	AI_export_Plate 1 UNS LN_E11_E11_CD8p_CD8_live.fcs	RVz16_Control_36_UNS	Control	RVz16	thirty_six	Control_thirty_six	UNS	E11
1152	Sample_51	6	17	0.0226667	NA	NA	NA	Sample_51	AI_export_Plate 1 UNS LN_E11_E11_CD8p_CD8_live.fcs	RVz16_Control_36_UNS	Control	RVz16	thirty_six	Control_thirty_six	UNS	E11
1153	Sample_51	7	10	0.0133333	19.5135	19.5505	0.146994	Sample_51	AI_export_Plate 1 UNS LN_E11_E11_CD8p_CD8_live.fcs	RVz16_Control_36_UNS	Control	RVz16	thirty_six	Control_thirty_six	UNS	E11
1154	Sample_51	8	30	0.04	11.3997	11.8172	1.96781	Sample_51	AI_export_Plate 1 UNS LN_E11_E11_CD8p_CD8_live.fcs	RVz16_Control_36_UNS	Control	RVz16	thirty_six	Control_thirty_six	UNS	E11
1155	Sample_51	9	30	0.04	16.4121	15.8914	1.33796	Sample_51	AI_export_Plate 1 UNS LN_E11_E11_CD8p_CD8_live.fcs	RVz16_Control_36_UNS	Control	RVz16	thirty_six	Control_thirty_six	UNS	E11
1156	Sample_52	1	123	0.164	21.3931	21.6018	2.73252	Sample_52	AI_export_Plate 1 UNS LN_E12_E12_CD8p_CD8_live.fcs	RYm17_aIL10+aPD1_36_UNS	aIL10+aPD1	RYm17	thirty_six	aIL10+aPD1_thirty_six	UNS	E12
1157	Sample_52	10	22	0.0293333	16.2499	16.8548	2.21262	Sample_52	AI_export_Plate 1 UNS LN_E12_E12_CD8p_CD8_live.fcs	RYm17_aIL10+aPD1_36_UNS	aIL10+aPD1	RYm17	thirty_six	aIL10+aPD1_thirty_six	UNS	E12
1158	Sample_52	11	13	0.0173333	19.5013	19.5483	0.211785	Sample_52	AI_export_Plate 1 UNS LN_E12_E12_CD8p_CD8_live.fcs	RYm17_aIL10+aPD1_36_UNS	aIL10+aPD1	RYm17	thirty_six	aIL10+aPD1_thirty_six	UNS	E12
1159	Sample_52	12	8	0.0106667	8.74548	8.80413	0.889634	Sample_52	AI_export_Plate 1 UNS LN_E12_E12_CD8p_CD8_live.fcs	RYm17_aIL10+aPD1_36_UNS	aIL10+aPD1	RYm17	thirty_six	aIL10+aPD1_thirty_six	UNS	E12
1160	Sample_52	13	30	0.04	NA	NA	NA	Sample_52	AI_export_Plate 1 UNS LN_E12_E12_CD8p_CD8_live.fcs	RYm17_aIL10+aPD1_36_UNS	aIL10+aPD1	RYm17	thirty_six	aIL10+aPD1_thirty_six	UNS	E12
1161	Sample_52	14	1	0.00133333	NA	NA	NA	Sample_52	AI_export_Plate 1 UNS LN_E12_E12_CD8p_CD8_live.fcs	RYm17_aIL10+aPD1_36_UNS	aIL10+aPD1	RYm17	thirty_six	aIL10+aPD1_thirty_six	UNS	E12
1162	Sample_52	15	2	0.00266667	24.7633	24.7633	NA	Sample_52	AI_export_Plate 1 UNS LN_E12_E12_CD8p_CD8_live.fcs	RYm17_aIL10+aPD1_36_UNS	aIL10+aPD1	RYm17	thirty_six	aIL10+aPD1_thirty_six	UNS	E12
1163	Sample_52	2	47	0.0626667	4.49043	4.45682	2.55398	Sample_52	AI_export_Plate 1 UNS LN_E12_E12_CD8p_CD8_live.fcs	RYm17_aIL10+aPD1_36_UNS	aIL10+aPD1	RYm17	thirty_six	aIL10+aPD1_thirty_six	UNS	E12
1164	Sample_52	3	68	0.0906667	4.13818	3.66676	2.20232	Sample_52	AI_export_Plate 1 UNS LN_E12_E12_CD8p_CD8_live.fcs	RYm17_aIL10+aPD1_36_UNS	aIL10+aPD1	RYm17	thirty_six	aIL10+aPD1_thirty_six	UNS	E12
1165	Sample_52	4	124	0.165333	13.0208	13.0208	0.271252	Sample_52	AI_export_Plate 1 UNS LN_E12_E12_CD8p_CD8_live.fcs	RYm17_aIL10+aPD1_36_UNS	aIL10+aPD1	RYm17	thirty_six	aIL10+aPD1_thirty_six	UNS	E12
1166	Sample_52	5	95	0.126667	19.1774	19.299	1.16915	Sample_52	AI_export_Plate 1 UNS LN_E12_E12_CD8p_CD8_live.fcs	RYm17_aIL10+aPD1_36_UNS	aIL10+aPD1	RYm17	thirty_six	aIL10+aPD1_thirty_six	UNS	E12
1167	Sample_52	6	53	0.0706667	19.1038	19.1038	NA	Sample_52	AI_export_Plate 1 UNS LN_E12_E12_CD8p_CD8_live.fcs	RYm17_aIL10+aPD1_36_UNS	aIL10+aPD1	RYm17	thirty_six	aIL10+aPD1_thirty_six	UNS	E12
1168	Sample_52	7	43	0.0573333	19.1604	19.5921	1.21854	Sample_52	AI_export_Plate 1 UNS LN_E12_E12_CD8p_CD8_live.fcs	RYm17_aIL10+aPD1_36_UNS	aIL10+aPD1	RYm17	thirty_six	aIL10+aPD1_thirty_six	UNS	E12
1169	Sample_52	8	76	0.101333	11.7984	11.7791	1.94275	Sample_52	AI_export_Plate 1 UNS LN_E12_E12_CD8p_CD8_live.fcs	RYm17_aIL10+aPD1_36_UNS	aIL10+aPD1	RYm17	thirty_six	aIL10+aPD1_thirty_six	UNS	E12
1170	Sample_52	9	45	0.06	15.7928	15.8914	1.18686	Sample_52	AI_export_Plate 1 UNS LN_E12_E12_CD8p_CD8_live.fcs	RYm17_aIL10+aPD1_36_UNS	aIL10+aPD1	RYm17	thirty_six	aIL10+aPD1_thirty_six	UNS	E12
1171	Sample_53	1	31	0.0413333	20.8471	21.7313	3.99184	Sample_53	AI_export_Plate 1 UNS LN_E2_E02_CD8p_CD8_live.fcs	34897_aIL10_21_UNS	aIL10	34897	twenty_one	aIL10_twenty_one	UNS	E02
1172	Sample_53	10	33	0.044	15.6938	16.6688	2.82233	Sample_53	AI_export_Plate 1 UNS LN_E2_E02_CD8p_CD8_live.fcs	34897_aIL10_21_UNS	aIL10	34897	twenty_one	aIL10_twenty_one	UNS	E02
1173	Sample_53	11	15	0.02	18.6618	19.3937	1.19991	Sample_53	AI_export_Plate 1 UNS LN_E2_E02_CD8p_CD8_live.fcs	34897_aIL10_21_UNS	aIL10	34897	twenty_one	aIL10_twenty_one	UNS	E02
1174	Sample_53	12	8	0.0106667	8.66024	8.55736	0.571868	Sample_53	AI_export_Plate 1 UNS LN_E2_E02_CD8p_CD8_live.fcs	34897_aIL10_21_UNS	aIL10	34897	twenty_one	aIL10_twenty_one	UNS	E02
1175	Sample_53	13	67	0.0893333	NA	NA	NA	Sample_53	AI_export_Plate 1 UNS LN_E2_E02_CD8p_CD8_live.fcs	34897_aIL10_21_UNS	aIL10	34897	twenty_one	aIL10_twenty_one	UNS	E02
1176	Sample_53	14	0	0	NA	NA	NA	Sample_53	AI_export_Plate 1 UNS LN_E2_E02_CD8p_CD8_live.fcs	34897_aIL10_21_UNS	aIL10	34897	twenty_one	aIL10_twenty_one	UNS	E02
1177	Sample_53	15	0	0	NA	NA	NA	Sample_53	AI_export_Plate 1 UNS LN_E2_E02_CD8p_CD8_live.fcs	34897_aIL10_21_UNS	aIL10	34897	twenty_one	aIL10_twenty_one	UNS	E02
1178	Sample_53	2	131	0.174667	4.63917	4.75563	2.03281	Sample_53	AI_export_Plate 1 UNS LN_E2_E02_CD8p_CD8_live.fcs	34897_aIL10_21_UNS	aIL10	34897	twenty_one	aIL10_twenty_one	UNS	E02
1179	Sample_53	3	72	0.096	3.3093	3.0427	1.98614	Sample_53	AI_export_Plate 1 UNS LN_E2_E02_CD8p_CD8_live.fcs	34897_aIL10_21_UNS	aIL10	34897	twenty_one	aIL10_twenty_one	UNS	E02
1180	Sample_53	4	177	0.236	15.8914	15.8914	NA	Sample_53	AI_export_Plate 1 UNS LN_E2_E02_CD8p_CD8_live.fcs	34897_aIL10_21_UNS	aIL10	34897	twenty_one	aIL10_twenty_one	UNS	E02
1181	Sample_53	5	51	0.068	18.5463	18.8724	1.04628	Sample_53	AI_export_Plate 1 UNS LN_E2_E02_CD8p_CD8_live.fcs	34897_aIL10_21_UNS	aIL10	34897	twenty_one	aIL10_twenty_one	UNS	E02
1182	Sample_53	6	100	0.133333	19.1091	19.1091	NA	Sample_53	AI_export_Plate 1 UNS LN_E2_E02_CD8p_CD8_live.fcs	34897_aIL10_21_UNS	aIL10	34897	twenty_one	aIL10_twenty_one	UNS	E02
1183	Sample_53	7	18	0.024	19.3746	19.5021	0.296542	Sample_53	AI_export_Plate 1 UNS LN_E2_E02_CD8p_CD8_live.fcs	34897_aIL10_21_UNS	aIL10	34897	twenty_one	aIL10_twenty_one	UNS	E02
1184	Sample_53	8	29	0.0386667	11.1836	11.7297	1.63366	Sample_53	AI_export_Plate 1 UNS LN_E2_E02_CD8p_CD8_live.fcs	34897_aIL10_21_UNS	aIL10	34897	twenty_one	aIL10_twenty_one	UNS	E02
1185	Sample_53	9	18	0.024	15.8119	15.8914	0.502144	Sample_53	AI_export_Plate 1 UNS LN_E2_E02_CD8p_CD8_live.fcs	34897_aIL10_21_UNS	aIL10	34897	twenty_one	aIL10_twenty_one	UNS	E02
1186	Sample_54	1	121	0.161333	21.8133	22.3449	3.07865	Sample_54	AI_export_Plate 1 UNS LN_E3_E03_CD8p_CD8_live.fcs	RRh17_aIL10+aPD1_21_UNS	aIL10+aPD1	RRh17	twenty_one	aIL10+aPD1_twenty_one	UNS	E03
1187	Sample_54	10	7	0.00933333	16.0409	16.7505	3.32917	Sample_54	AI_export_Plate 1 UNS LN_E3_E03_CD8p_CD8_live.fcs	RRh17_aIL10+aPD1_21_UNS	aIL10+aPD1	RRh17	twenty_one	aIL10+aPD1_twenty_one	UNS	E03
1188	Sample_54	11	33	0.044	18.7569	19.5483	2.802	Sample_54	AI_export_Plate 1 UNS LN_E3_E03_CD8p_CD8_live.fcs	RRh17_aIL10+aPD1_21_UNS	aIL10+aPD1	RRh17	twenty_one	aIL10+aPD1_twenty_one	UNS	E03
1189	Sample_54	12	9	0.012	9.04218	8.40946	1.45707	Sample_54	AI_export_Plate 1 UNS LN_E3_E03_CD8p_CD8_live.fcs	RRh17_aIL10+aPD1_21_UNS	aIL10+aPD1	RRh17	twenty_one	aIL10+aPD1_twenty_one	UNS	E03
1190	Sample_54	13	4	0.00533333	NA	NA	NA	Sample_54	AI_export_Plate 1 UNS LN_E3_E03_CD8p_CD8_live.fcs	RRh17_aIL10+aPD1_21_UNS	aIL10+aPD1	RRh17	twenty_one	aIL10+aPD1_twenty_one	UNS	E03
1191	Sample_54	14	0	0	NA	NA	NA	Sample_54	AI_export_Plate 1 UNS LN_E3_E03_CD8p_CD8_live.fcs	RRh17_aIL10+aPD1_21_UNS	aIL10+aPD1	RRh17	twenty_one	aIL10+aPD1_twenty_one	UNS	E03
1192	Sample_54	15	2	0.00266667	NA	NA	NA	Sample_54	AI_export_Plate 1 UNS LN_E3_E03_CD8p_CD8_live.fcs	RRh17_aIL10+aPD1_21_UNS	aIL10+aPD1	RRh17	twenty_one	aIL10+aPD1_twenty_one	UNS	E03
1193	Sample_54	2	197	0.262667	4.42104	4.52145	2.43711	Sample_54	AI_export_Plate 1 UNS LN_E3_E03_CD8p_CD8_live.fcs	RRh17_aIL10+aPD1_21_UNS	aIL10+aPD1	RRh17	twenty_one	aIL10+aPD1_twenty_one	UNS	E03
1194	Sample_54	3	109	0.145333	3.60711	3.48429	1.70133	Sample_54	AI_export_Plate 1 UNS LN_E3_E03_CD8p_CD8_live.fcs	RRh17_aIL10+aPD1_21_UNS	aIL10+aPD1	RRh17	twenty_one	aIL10+aPD1_twenty_one	UNS	E03
1195	Sample_54	4	30	0.04	NA	NA	NA	Sample_54	AI_export_Plate 1 UNS LN_E3_E03_CD8p_CD8_live.fcs	RRh17_aIL10+aPD1_21_UNS	aIL10+aPD1	RRh17	twenty_one	aIL10+aPD1_twenty_one	UNS	E03
1196	Sample_54	5	82	0.109333	18.5747	18.9397	1.90936	Sample_54	AI_export_Plate 1 UNS LN_E3_E03_CD8p_CD8_live.fcs	RRh17_aIL10+aPD1_21_UNS	aIL10+aPD1	RRh17	twenty_one	aIL10+aPD1_twenty_one	UNS	E03
1197	Sample_54	6	24	0.032	19.083	19.083	0.592667	Sample_54	AI_export_Plate 1 UNS LN_E3_E03_CD8p_CD8_live.fcs	RRh17_aIL10+aPD1_21_UNS	aIL10+aPD1	RRh17	twenty_one	aIL10+aPD1_twenty_one	UNS	E03
1198	Sample_54	7	69	0.092	19.4983	19.5961	0.432027	Sample_54	AI_export_Plate 1 UNS LN_E3_E03_CD8p_CD8_live.fcs	RRh17_aIL10+aPD1_21_UNS	aIL10+aPD1	RRh17	twenty_one	aIL10+aPD1_twenty_one	UNS	E03
1199	Sample_54	8	33	0.044	12.2722	11.7931	2.63585	Sample_54	AI_export_Plate 1 UNS LN_E3_E03_CD8p_CD8_live.fcs	RRh17_aIL10+aPD1_21_UNS	aIL10+aPD1	RRh17	twenty_one	aIL10+aPD1_twenty_one	UNS	E03
1200	Sample_54	9	30	0.04	16.0187	15.8914	0.855958	Sample_54	AI_export_Plate 1 UNS LN_E3_E03_CD8p_CD8_live.fcs	RRh17_aIL10+aPD1_21_UNS	aIL10+aPD1	RRh17	twenty_one	aIL10+aPD1_twenty_one	UNS	E03
1201	Sample_55	1	110	0.146667	21.8984	23.0141	3.10385	Sample_55	AI_export_Plate 1 UNS LN_E4_E04_CD8p_CD8_live.fcs	RFn17_aIL10_21_UNS	aIL10	RFn17	twenty_one	aIL10_twenty_one	UNS	E04
1202	Sample_55	10	20	0.0266667	15.2458	15.7309	2.80722	Sample_55	AI_export_Plate 1 UNS LN_E4_E04_CD8p_CD8_live.fcs	RFn17_aIL10_21_UNS	aIL10	RFn17	twenty_one	aIL10_twenty_one	UNS	E04
1203	Sample_55	11	44	0.0586667	18.6318	19.5483	3.31021	Sample_55	AI_export_Plate 1 UNS LN_E4_E04_CD8p_CD8_live.fcs	RFn17_aIL10_21_UNS	aIL10	RFn17	twenty_one	aIL10_twenty_one	UNS	E04
1204	Sample_55	12	9	0.012	8.38414	8.35842	0.684214	Sample_55	AI_export_Plate 1 UNS LN_E4_E04_CD8p_CD8_live.fcs	RFn17_aIL10_21_UNS	aIL10	RFn17	twenty_one	aIL10_twenty_one	UNS	E04
1205	Sample_55	13	11	0.0146667	NA	NA	NA	Sample_55	AI_export_Plate 1 UNS LN_E4_E04_CD8p_CD8_live.fcs	RFn17_aIL10_21_UNS	aIL10	RFn17	twenty_one	aIL10_twenty_one	UNS	E04
1206	Sample_55	14	1	0.00133333	19.3885	19.3885	NA	Sample_55	AI_export_Plate 1 UNS LN_E4_E04_CD8p_CD8_live.fcs	RFn17_aIL10_21_UNS	aIL10	RFn17	twenty_one	aIL10_twenty_one	UNS	E04
1207	Sample_55	15	0	0	NA	NA	NA	Sample_55	AI_export_Plate 1 UNS LN_E4_E04_CD8p_CD8_live.fcs	RFn17_aIL10_21_UNS	aIL10	RFn17	twenty_one	aIL10_twenty_one	UNS	E04
1208	Sample_55	2	165	0.22	4.25124	4.52145	2.22291	Sample_55	AI_export_Plate 1 UNS LN_E4_E04_CD8p_CD8_live.fcs	RFn17_aIL10_21_UNS	aIL10	RFn17	twenty_one	aIL10_twenty_one	UNS	E04
1209	Sample_55	3	79	0.105333	3.55247	3.26132	1.90036	Sample_55	AI_export_Plate 1 UNS LN_E4_E04_CD8p_CD8_live.fcs	RFn17_aIL10_21_UNS	aIL10	RFn17	twenty_one	aIL10_twenty_one	UNS	E04
1210	Sample_55	4	96	0.128	14.13	14.13	NA	Sample_55	AI_export_Plate 1 UNS LN_E4_E04_CD8p_CD8_live.fcs	RFn17_aIL10_21_UNS	aIL10	RFn17	twenty_one	aIL10_twenty_one	UNS	E04
1211	Sample_55	5	76	0.101333	18.6513	18.8094	1.12364	Sample_55	AI_export_Plate 1 UNS LN_E4_E04_CD8p_CD8_live.fcs	RFn17_aIL10_21_UNS	aIL10	RFn17	twenty_one	aIL10_twenty_one	UNS	E04
1212	Sample_55	6	52	0.0693333	NA	NA	NA	Sample_55	AI_export_Plate 1 UNS LN_E4_E04_CD8p_CD8_live.fcs	RFn17_aIL10_21_UNS	aIL10	RFn17	twenty_one	aIL10_twenty_one	UNS	E04
1213	Sample_55	7	18	0.024	19.5805	19.5961	0.0684428	Sample_55	AI_export_Plate 1 UNS LN_E4_E04_CD8p_CD8_live.fcs	RFn17_aIL10_21_UNS	aIL10	RFn17	twenty_one	aIL10_twenty_one	UNS	E04
1214	Sample_55	8	44	0.0586667	11.7298	11.7973	0.926617	Sample_55	AI_export_Plate 1 UNS LN_E4_E04_CD8p_CD8_live.fcs	RFn17_aIL10_21_UNS	aIL10	RFn17	twenty_one	aIL10_twenty_one	UNS	E04
1215	Sample_55	9	25	0.0333333	16.1704	15.8914	1.37885	Sample_55	AI_export_Plate 1 UNS LN_E4_E04_CD8p_CD8_live.fcs	RFn17_aIL10_21_UNS	aIL10	RFn17	twenty_one	aIL10_twenty_one	UNS	E04
1216	Sample_56	1	102	0.136	21.8478	22.3055	3.10904	Sample_56	AI_export_Plate 1 UNS LN_E5_E05_CD8p_CD8_live.fcs	RVm17_aIL10_21_UNS	aIL10	RVm17	twenty_one	aIL10_twenty_one	UNS	E05
1217	Sample_56	10	19	0.0253333	15.5717	16.3032	2.46855	Sample_56	AI_export_Plate 1 UNS LN_E5_E05_CD8p_CD8_live.fcs	RVm17_aIL10_21_UNS	aIL10	RVm17	twenty_one	aIL10_twenty_one	UNS	E05
1218	Sample_56	11	35	0.0466667	19.0752	19.5483	1.32148	Sample_56	AI_export_Plate 1 UNS LN_E5_E05_CD8p_CD8_live.fcs	RVm17_aIL10_21_UNS	aIL10	RVm17	twenty_one	aIL10_twenty_one	UNS	E05
1219	Sample_56	12	10	0.0133333	8.5957	8.40946	0.742619	Sample_56	AI_export_Plate 1 UNS LN_E5_E05_CD8p_CD8_live.fcs	RVm17_aIL10_21_UNS	aIL10	RVm17	twenty_one	aIL10_twenty_one	UNS	E05
1220	Sample_56	13	16	0.0213333	NA	NA	NA	Sample_56	AI_export_Plate 1 UNS LN_E5_E05_CD8p_CD8_live.fcs	RVm17_aIL10_21_UNS	aIL10	RVm17	twenty_one	aIL10_twenty_one	UNS	E05
1221	Sample_56	14	0	0	NA	NA	NA	Sample_56	AI_export_Plate 1 UNS LN_E5_E05_CD8p_CD8_live.fcs	RVm17_aIL10_21_UNS	aIL10	RVm17	twenty_one	aIL10_twenty_one	UNS	E05
1222	Sample_56	15	0	0	NA	NA	NA	Sample_56	AI_export_Plate 1 UNS LN_E5_E05_CD8p_CD8_live.fcs	RVm17_aIL10_21_UNS	aIL10	RVm17	twenty_one	aIL10_twenty_one	UNS	E05
1223	Sample_56	2	133	0.177333	4.34578	4.52145	2.29317	Sample_56	AI_export_Plate 1 UNS LN_E5_E05_CD8p_CD8_live.fcs	RVm17_aIL10_21_UNS	aIL10	RVm17	twenty_one	aIL10_twenty_one	UNS	E05
1224	Sample_56	3	76	0.101333	4.20536	3.603	3.12508	Sample_56	AI_export_Plate 1 UNS LN_E5_E05_CD8p_CD8_live.fcs	RVm17_aIL10_21_UNS	aIL10	RVm17	twenty_one	aIL10_twenty_one	UNS	E05
1225	Sample_56	4	108	0.144	NA	NA	NA	Sample_56	AI_export_Plate 1 UNS LN_E5_E05_CD8p_CD8_live.fcs	RVm17_aIL10_21_UNS	aIL10	RVm17	twenty_one	aIL10_twenty_one	UNS	E05
1226	Sample_56	5	89	0.118667	18.3999	18.3694	1.87733	Sample_56	AI_export_Plate 1 UNS LN_E5_E05_CD8p_CD8_live.fcs	RVm17_aIL10_21_UNS	aIL10	RVm17	twenty_one	aIL10_twenty_one	UNS	E05
1227	Sample_56	6	56	0.0746667	NA	NA	NA	Sample_56	AI_export_Plate 1 UNS LN_E5_E05_CD8p_CD8_live.fcs	RVm17_aIL10_21_UNS	aIL10	RVm17	twenty_one	aIL10_twenty_one	UNS	E05
1228	Sample_56	7	38	0.0506667	19.5058	19.5961	0.186293	Sample_56	AI_export_Plate 1 UNS LN_E5_E05_CD8p_CD8_live.fcs	RVm17_aIL10_21_UNS	aIL10	RVm17	twenty_one	aIL10_twenty_one	UNS	E05
1229	Sample_56	8	38	0.0506667	11.7455	11.9358	2.09395	Sample_56	AI_export_Plate 1 UNS LN_E5_E05_CD8p_CD8_live.fcs	RVm17_aIL10_21_UNS	aIL10	RVm17	twenty_one	aIL10_twenty_one	UNS	E05
1230	Sample_56	9	30	0.04	15.6679	15.8914	0.889585	Sample_56	AI_export_Plate 1 UNS LN_E5_E05_CD8p_CD8_live.fcs	RVm17_aIL10_21_UNS	aIL10	RVm17	twenty_one	aIL10_twenty_one	UNS	E05
1231	Sample_57	1	97	0.129333	21.294	21.2996	2.9032	Sample_57	AI_export_Plate 1 UNS LN_E6_E06_CD8p_CD8_live.fcs	RBe17_Control_21_UNS	Control	RBe17	twenty_one	Control_twenty_one	UNS	E06
1232	Sample_57	10	32	0.0426667	15.112	15.5743	2.57037	Sample_57	AI_export_Plate 1 UNS LN_E6_E06_CD8p_CD8_live.fcs	RBe17_Control_21_UNS	Control	RBe17	twenty_one	Control_twenty_one	UNS	E06
1233	Sample_57	11	18	0.024	17.6217	19.5385	4.31901	Sample_57	AI_export_Plate 1 UNS LN_E6_E06_CD8p_CD8_live.fcs	RBe17_Control_21_UNS	Control	RBe17	twenty_one	Control_twenty_one	UNS	E06
1234	Sample_57	12	8	0.0106667	8.11983	8.4212	2.24458	Sample_57	AI_export_Plate 1 UNS LN_E6_E06_CD8p_CD8_live.fcs	RBe17_Control_21_UNS	Control	RBe17	twenty_one	Control_twenty_one	UNS	E06
1235	Sample_57	13	17	0.0226667	NA	NA	NA	Sample_57	AI_export_Plate 1 UNS LN_E6_E06_CD8p_CD8_live.fcs	RBe17_Control_21_UNS	Control	RBe17	twenty_one	Control_twenty_one	UNS	E06
1236	Sample_57	14	2	0.00266667	0.56396	0.56396	NA	Sample_57	AI_export_Plate 1 UNS LN_E6_E06_CD8p_CD8_live.fcs	RBe17_Control_21_UNS	Control	RBe17	twenty_one	Control_twenty_one	UNS	E06
1237	Sample_57	15	1	0.00133333	NA	NA	NA	Sample_57	AI_export_Plate 1 UNS LN_E6_E06_CD8p_CD8_live.fcs	RBe17_Control_21_UNS	Control	RBe17	twenty_one	Control_twenty_one	UNS	E06
1238	Sample_57	2	155	0.206667	4.74829	4.71621	2.29995	Sample_57	AI_export_Plate 1 UNS LN_E6_E06_CD8p_CD8_live.fcs	RBe17_Control_21_UNS	Control	RBe17	twenty_one	Control_twenty_one	UNS	E06
1239	Sample_57	3	89	0.118667	3.94632	3.66676	2.18334	Sample_57	AI_export_Plate 1 UNS LN_E6_E06_CD8p_CD8_live.fcs	RBe17_Control_21_UNS	Control	RBe17	twenty_one	Control_twenty_one	UNS	E06
1240	Sample_57	4	124	0.165333	22.7135	22.7135	NA	Sample_57	AI_export_Plate 1 UNS LN_E6_E06_CD8p_CD8_live.fcs	RBe17_Control_21_UNS	Control	RBe17	twenty_one	Control_twenty_one	UNS	E06
1241	Sample_57	5	67	0.0893333	18.5442	18.6592	0.879727	Sample_57	AI_export_Plate 1 UNS LN_E6_E06_CD8p_CD8_live.fcs	RBe17_Control_21_UNS	Control	RBe17	twenty_one	Control_twenty_one	UNS	E06
1242	Sample_57	6	43	0.0573333	NA	NA	NA	Sample_57	AI_export_Plate 1 UNS LN_E6_E06_CD8p_CD8_live.fcs	RBe17_Control_21_UNS	Control	RBe17	twenty_one	Control_twenty_one	UNS	E06
1243	Sample_57	7	23	0.0306667	19.4427	19.5961	0.225848	Sample_57	AI_export_Plate 1 UNS LN_E6_E06_CD8p_CD8_live.fcs	RBe17_Control_21_UNS	Control	RBe17	twenty_one	Control_twenty_one	UNS	E06
1244	Sample_57	8	38	0.0506667	11.8295	11.9076	2.57928	Sample_57	AI_export_Plate 1 UNS LN_E6_E06_CD8p_CD8_live.fcs	RBe17_Control_21_UNS	Control	RBe17	twenty_one	Control_twenty_one	UNS	E06
1245	Sample_57	9	36	0.048	15.6614	15.8914	1.35557	Sample_57	AI_export_Plate 1 UNS LN_E6_E06_CD8p_CD8_live.fcs	RBe17_Control_21_UNS	Control	RBe17	twenty_one	Control_twenty_one	UNS	E06
1246	Sample_58	1	71	0.0946667	22.2678	22.4267	1.87194	Sample_58	AI_export_Plate 1 UNS LN_E7_E07_CD8p_CD8_live.fcs	RMl17_Control_21_UNS	Control	RMl17	twenty_one	Control_twenty_one	UNS	E07
1247	Sample_58	10	21	0.028	15.3784	16.7332	2.91848	Sample_58	AI_export_Plate 1 UNS LN_E7_E07_CD8p_CD8_live.fcs	RMl17_Control_21_UNS	Control	RMl17	twenty_one	Control_twenty_one	UNS	E07
1248	Sample_58	11	50	0.0666667	19.3646	19.5483	0.634932	Sample_58	AI_export_Plate 1 UNS LN_E7_E07_CD8p_CD8_live.fcs	RMl17_Control_21_UNS	Control	RMl17	twenty_one	Control_twenty_one	UNS	E07
1249	Sample_58	12	10	0.0133333	8.54172	8.37071	0.460987	Sample_58	AI_export_Plate 1 UNS LN_E7_E07_CD8p_CD8_live.fcs	RMl17_Control_21_UNS	Control	RMl17	twenty_one	Control_twenty_one	UNS	E07
1250	Sample_58	13	12	0.016	NA	NA	NA	Sample_58	AI_export_Plate 1 UNS LN_E7_E07_CD8p_CD8_live.fcs	RMl17_Control_21_UNS	Control	RMl17	twenty_one	Control_twenty_one	UNS	E07
1251	Sample_58	14	0	0	NA	NA	NA	Sample_58	AI_export_Plate 1 UNS LN_E7_E07_CD8p_CD8_live.fcs	RMl17_Control_21_UNS	Control	RMl17	twenty_one	Control_twenty_one	UNS	E07
1252	Sample_58	15	1	0.00133333	9.04525	9.04525	NA	Sample_58	AI_export_Plate 1 UNS LN_E7_E07_CD8p_CD8_live.fcs	RMl17_Control_21_UNS	Control	RMl17	twenty_one	Control_twenty_one	UNS	E07
1253	Sample_58	2	164	0.218667	4.03705	4.19865	2.14629	Sample_58	AI_export_Plate 1 UNS LN_E7_E07_CD8p_CD8_live.fcs	RMl17_Control_21_UNS	Control	RMl17	twenty_one	Control_twenty_one	UNS	E07
1254	Sample_58	3	76	0.101333	3.77226	3.66676	1.75888	Sample_58	AI_export_Plate 1 UNS LN_E7_E07_CD8p_CD8_live.fcs	RMl17_Control_21_UNS	Control	RMl17	twenty_one	Control_twenty_one	UNS	E07
1255	Sample_58	4	102	0.136	18.9874	18.9874	NA	Sample_58	AI_export_Plate 1 UNS LN_E7_E07_CD8p_CD8_live.fcs	RMl17_Control_21_UNS	Control	RMl17	twenty_one	Control_twenty_one	UNS	E07
1256	Sample_58	5	77	0.102667	18.8144	18.9434	1.33098	Sample_58	AI_export_Plate 1 UNS LN_E7_E07_CD8p_CD8_live.fcs	RMl17_Control_21_UNS	Control	RMl17	twenty_one	Control_twenty_one	UNS	E07
1257	Sample_58	6	47	0.0626667	19.3526	19.3526	0.344346	Sample_58	AI_export_Plate 1 UNS LN_E7_E07_CD8p_CD8_live.fcs	RMl17_Control_21_UNS	Control	RMl17	twenty_one	Control_twenty_one	UNS	E07
1258	Sample_58	7	33	0.044	19.5286	19.5961	0.191675	Sample_58	AI_export_Plate 1 UNS LN_E7_E07_CD8p_CD8_live.fcs	RMl17_Control_21_UNS	Control	RMl17	twenty_one	Control_twenty_one	UNS	E07
1259	Sample_58	8	44	0.0586667	11.6886	11.7791	1.41125	Sample_58	AI_export_Plate 1 UNS LN_E7_E07_CD8p_CD8_live.fcs	RMl17_Control_21_UNS	Control	RMl17	twenty_one	Control_twenty_one	UNS	E07
1260	Sample_58	9	42	0.056	15.876	15.8914	1.12387	Sample_58	AI_export_Plate 1 UNS LN_E7_E07_CD8p_CD8_live.fcs	RMl17_Control_21_UNS	Control	RMl17	twenty_one	Control_twenty_one	UNS	E07
1261	Sample_59	1	44	0.0586667	21.7058	22.7135	3.5161	Sample_59	AI_export_Plate 1 UNS LN_E8_E08_CD8p_CD8_live.fcs	RIb17_aIL10+aPD1_21_UNS	aIL10+aPD1	RIb17	twenty_one	aIL10+aPD1_twenty_one	UNS	E08
1262	Sample_59	10	19	0.0253333	15.6862	15.8464	1.46125	Sample_59	AI_export_Plate 1 UNS LN_E8_E08_CD8p_CD8_live.fcs	RIb17_aIL10+aPD1_21_UNS	aIL10+aPD1	RIb17	twenty_one	aIL10+aPD1_twenty_one	UNS	E08
1263	Sample_59	11	17	0.0226667	18.6487	19.5483	2.94507	Sample_59	AI_export_Plate 1 UNS LN_E8_E08_CD8p_CD8_live.fcs	RIb17_aIL10+aPD1_21_UNS	aIL10+aPD1	RIb17	twenty_one	aIL10+aPD1_twenty_one	UNS	E08
1264	Sample_59	12	6	0.008	9.58223	8.38284	3.12162	Sample_59	AI_export_Plate 1 UNS LN_E8_E08_CD8p_CD8_live.fcs	RIb17_aIL10+aPD1_21_UNS	aIL10+aPD1	RIb17	twenty_one	aIL10+aPD1_twenty_one	UNS	E08
1265	Sample_59	13	43	0.0573333	NA	NA	NA	Sample_59	AI_export_Plate 1 UNS LN_E8_E08_CD8p_CD8_live.fcs	RIb17_aIL10+aPD1_21_UNS	aIL10+aPD1	RIb17	twenty_one	aIL10+aPD1_twenty_one	UNS	E08
1266	Sample_59	14	1	0.00133333	0.56396	0.56396	NA	Sample_59	AI_export_Plate 1 UNS LN_E8_E08_CD8p_CD8_live.fcs	RIb17_aIL10+aPD1_21_UNS	aIL10+aPD1	RIb17	twenty_one	aIL10+aPD1_twenty_one	UNS	E08
1267	Sample_59	15	0	0	NA	NA	NA	Sample_59	AI_export_Plate 1 UNS LN_E8_E08_CD8p_CD8_live.fcs	RIb17_aIL10+aPD1_21_UNS	aIL10+aPD1	RIb17	twenty_one	aIL10+aPD1_twenty_one	UNS	E08
1268	Sample_59	2	115	0.153333	4.80528	4.71621	2.42689	Sample_59	AI_export_Plate 1 UNS LN_E8_E08_CD8p_CD8_live.fcs	RIb17_aIL10+aPD1_21_UNS	aIL10+aPD1	RIb17	twenty_one	aIL10+aPD1_twenty_one	UNS	E08
1269	Sample_59	3	50	0.0666667	4.31733	3.66676	3.60197	Sample_59	AI_export_Plate 1 UNS LN_E8_E08_CD8p_CD8_live.fcs	RIb17_aIL10+aPD1_21_UNS	aIL10+aPD1	RIb17	twenty_one	aIL10+aPD1_twenty_one	UNS	E08
1270	Sample_59	4	251	0.334667	15.9601	15.9601	NA	Sample_59	AI_export_Plate 1 UNS LN_E8_E08_CD8p_CD8_live.fcs	RIb17_aIL10+aPD1_21_UNS	aIL10+aPD1	RIb17	twenty_one	aIL10+aPD1_twenty_one	UNS	E08
1271	Sample_59	5	43	0.0573333	18.2847	18.3843	1.89005	Sample_59	AI_export_Plate 1 UNS LN_E8_E08_CD8p_CD8_live.fcs	RIb17_aIL10+aPD1_21_UNS	aIL10+aPD1	RIb17	twenty_one	aIL10+aPD1_twenty_one	UNS	E08
1272	Sample_59	6	105	0.14	NA	NA	NA	Sample_59	AI_export_Plate 1 UNS LN_E8_E08_CD8p_CD8_live.fcs	RIb17_aIL10+aPD1_21_UNS	aIL10+aPD1	RIb17	twenty_one	aIL10+aPD1_twenty_one	UNS	E08
1273	Sample_59	7	11	0.0146667	19.4926	19.5961	0.313264	Sample_59	AI_export_Plate 1 UNS LN_E8_E08_CD8p_CD8_live.fcs	RIb17_aIL10+aPD1_21_UNS	aIL10+aPD1	RIb17	twenty_one	aIL10+aPD1_twenty_one	UNS	E08
1274	Sample_59	8	29	0.0386667	11.4761	11.7791	1.37463	Sample_59	AI_export_Plate 1 UNS LN_E8_E08_CD8p_CD8_live.fcs	RIb17_aIL10+aPD1_21_UNS	aIL10+aPD1	RIb17	twenty_one	aIL10+aPD1_twenty_one	UNS	E08
1275	Sample_59	9	16	0.0213333	15.8727	15.9266	0.881254	Sample_59	AI_export_Plate 1 UNS LN_E8_E08_CD8p_CD8_live.fcs	RIb17_aIL10+aPD1_21_UNS	aIL10+aPD1	RIb17	twenty_one	aIL10+aPD1_twenty_one	UNS	E08
1276	Sample_6	1	114	0.152	22.3645	23.3026	2.77228	Sample_6	AI_export_Plate 1 UNS LN_A3_A03_CD8p_CD8_live.fcs	RVz16_Control_-1_UNS	Control	RVz16	minus_one	Control_minus_one	UNS	A03
1277	Sample_6	10	15	0.02	11.8139	9.77664	3.46597	Sample_6	AI_export_Plate 1 UNS LN_A3_A03_CD8p_CD8_live.fcs	RVz16_Control_-1_UNS	Control	RVz16	minus_one	Control_minus_one	UNS	A03
1278	Sample_6	11	12	0.016	18.785	19.5483	2.00793	Sample_6	AI_export_Plate 1 UNS LN_A3_A03_CD8p_CD8_live.fcs	RVz16_Control_-1_UNS	Control	RVz16	minus_one	Control_minus_one	UNS	A03
1279	Sample_6	12	18	0.024	9.38218	8.63526	2.15453	Sample_6	AI_export_Plate 1 UNS LN_A3_A03_CD8p_CD8_live.fcs	RVz16_Control_-1_UNS	Control	RVz16	minus_one	Control_minus_one	UNS	A03
1280	Sample_6	13	6	0.008	NA	NA	NA	Sample_6	AI_export_Plate 1 UNS LN_A3_A03_CD8p_CD8_live.fcs	RVz16_Control_-1_UNS	Control	RVz16	minus_one	Control_minus_one	UNS	A03
1281	Sample_6	14	2	0.00266667	0.56396	0.56396	NA	Sample_6	AI_export_Plate 1 UNS LN_A3_A03_CD8p_CD8_live.fcs	RVz16_Control_-1_UNS	Control	RVz16	minus_one	Control_minus_one	UNS	A03
1282	Sample_6	15	0	0	NA	NA	NA	Sample_6	AI_export_Plate 1 UNS LN_A3_A03_CD8p_CD8_live.fcs	RVz16_Control_-1_UNS	Control	RVz16	minus_one	Control_minus_one	UNS	A03
1283	Sample_6	2	259	0.345333	4.96303	5.01806	2.63616	Sample_6	AI_export_Plate 1 UNS LN_A3_A03_CD8p_CD8_live.fcs	RVz16_Control_-1_UNS	Control	RVz16	minus_one	Control_minus_one	UNS	A03
1284	Sample_6	3	97	0.129333	3.45388	3.23623	2.25774	Sample_6	AI_export_Plate 1 UNS LN_A3_A03_CD8p_CD8_live.fcs	RVz16_Control_-1_UNS	Control	RVz16	minus_one	Control_minus_one	UNS	A03
1285	Sample_6	4	63	0.084	NA	NA	NA	Sample_6	AI_export_Plate 1 UNS LN_A3_A03_CD8p_CD8_live.fcs	RVz16_Control_-1_UNS	Control	RVz16	minus_one	Control_minus_one	UNS	A03
1286	Sample_6	5	94	0.125333	18.0393	18.6242	2.68634	Sample_6	AI_export_Plate 1 UNS LN_A3_A03_CD8p_CD8_live.fcs	RVz16_Control_-1_UNS	Control	RVz16	minus_one	Control_minus_one	UNS	A03
1287	Sample_6	6	10	0.0133333	NA	NA	NA	Sample_6	AI_export_Plate 1 UNS LN_A3_A03_CD8p_CD8_live.fcs	RVz16_Control_-1_UNS	Control	RVz16	minus_one	Control_minus_one	UNS	A03
1288	Sample_6	7	2	0.00266667	19.5961	19.5961	8.62169e-10	Sample_6	AI_export_Plate 1 UNS LN_A3_A03_CD8p_CD8_live.fcs	RVz16_Control_-1_UNS	Control	RVz16	minus_one	Control_minus_one	UNS	A03
1289	Sample_6	8	42	0.056	11.0114	11.3055	1.87316	Sample_6	AI_export_Plate 1 UNS LN_A3_A03_CD8p_CD8_live.fcs	RVz16_Control_-1_UNS	Control	RVz16	minus_one	Control_minus_one	UNS	A03
1290	Sample_6	9	16	0.0213333	16.1344	15.8914	0.749307	Sample_6	AI_export_Plate 1 UNS LN_A3_A03_CD8p_CD8_live.fcs	RVz16_Control_-1_UNS	Control	RVz16	minus_one	Control_minus_one	UNS	A03
1291	Sample_60	1	120	0.16	21.7677	21.9647	2.49323	Sample_60	AI_export_Plate 1 UNS LN_E9_E09_CD8p_CD8_live.fcs	RFl17_aIL10+aPD1_36_UNS	aIL10+aPD1	RFl17	thirty_six	aIL10+aPD1_thirty_six	UNS	E09
1292	Sample_60	10	31	0.0413333	14.8636	15.7355	4.08884	Sample_60	AI_export_Plate 1 UNS LN_E9_E09_CD8p_CD8_live.fcs	RFl17_aIL10+aPD1_36_UNS	aIL10+aPD1	RFl17	thirty_six	aIL10+aPD1_thirty_six	UNS	E09
1293	Sample_60	11	21	0.028	19.0003	19.5483	3.11346	Sample_60	AI_export_Plate 1 UNS LN_E9_E09_CD8p_CD8_live.fcs	RFl17_aIL10+aPD1_36_UNS	aIL10+aPD1	RFl17	thirty_six	aIL10+aPD1_thirty_six	UNS	E09
1294	Sample_60	12	12	0.016	9.59242	9.07958	1.76029	Sample_60	AI_export_Plate 1 UNS LN_E9_E09_CD8p_CD8_live.fcs	RFl17_aIL10+aPD1_36_UNS	aIL10+aPD1	RFl17	thirty_six	aIL10+aPD1_thirty_six	UNS	E09
1295	Sample_60	13	14	0.0186667	12.2376	12.2376	NA	Sample_60	AI_export_Plate 1 UNS LN_E9_E09_CD8p_CD8_live.fcs	RFl17_aIL10+aPD1_36_UNS	aIL10+aPD1	RFl17	thirty_six	aIL10+aPD1_thirty_six	UNS	E09
1296	Sample_60	14	1	0.00133333	0.56396	0.56396	NA	Sample_60	AI_export_Plate 1 UNS LN_E9_E09_CD8p_CD8_live.fcs	RFl17_aIL10+aPD1_36_UNS	aIL10+aPD1	RFl17	thirty_six	aIL10+aPD1_thirty_six	UNS	E09
1297	Sample_60	15	1	0.00133333	24.2411	24.2411	NA	Sample_60	AI_export_Plate 1 UNS LN_E9_E09_CD8p_CD8_live.fcs	RFl17_aIL10+aPD1_36_UNS	aIL10+aPD1	RFl17	thirty_six	aIL10+aPD1_thirty_six	UNS	E09
1298	Sample_60	2	164	0.218667	4.37952	4.43548	2.02326	Sample_60	AI_export_Plate 1 UNS LN_E9_E09_CD8p_CD8_live.fcs	RFl17_aIL10+aPD1_36_UNS	aIL10+aPD1	RFl17	thirty_six	aIL10+aPD1_thirty_six	UNS	E09
1299	Sample_60	3	78	0.104	4.07331	3.6348	2.76733	Sample_60	AI_export_Plate 1 UNS LN_E9_E09_CD8p_CD8_live.fcs	RFl17_aIL10+aPD1_36_UNS	aIL10+aPD1	RFl17	thirty_six	aIL10+aPD1_thirty_six	UNS	E09
1300	Sample_60	4	102	0.136	NA	NA	NA	Sample_60	AI_export_Plate 1 UNS LN_E9_E09_CD8p_CD8_live.fcs	RFl17_aIL10+aPD1_36_UNS	aIL10+aPD1	RFl17	thirty_six	aIL10+aPD1_thirty_six	UNS	E09
1301	Sample_60	5	73	0.0973333	18.6686	18.946	1.85632	Sample_60	AI_export_Plate 1 UNS LN_E9_E09_CD8p_CD8_live.fcs	RFl17_aIL10+aPD1_36_UNS	aIL10+aPD1	RFl17	thirty_six	aIL10+aPD1_thirty_six	UNS	E09
1302	Sample_60	6	38	0.0506667	19.2188	19.2188	0.200874	Sample_60	AI_export_Plate 1 UNS LN_E9_E09_CD8p_CD8_live.fcs	RFl17_aIL10+aPD1_36_UNS	aIL10+aPD1	RFl17	thirty_six	aIL10+aPD1_thirty_six	UNS	E09
1303	Sample_60	7	24	0.032	19.4606	19.5961	0.293878	Sample_60	AI_export_Plate 1 UNS LN_E9_E09_CD8p_CD8_live.fcs	RFl17_aIL10+aPD1_36_UNS	aIL10+aPD1	RFl17	thirty_six	aIL10+aPD1_thirty_six	UNS	E09
1304	Sample_60	8	46	0.0613333	12.0971	11.9046	2.55998	Sample_60	AI_export_Plate 1 UNS LN_E9_E09_CD8p_CD8_live.fcs	RFl17_aIL10+aPD1_36_UNS	aIL10+aPD1	RFl17	thirty_six	aIL10+aPD1_thirty_six	UNS	E09
1305	Sample_60	9	25	0.0333333	15.7495	15.8914	1.76013	Sample_60	AI_export_Plate 1 UNS LN_E9_E09_CD8p_CD8_live.fcs	RFl17_aIL10+aPD1_36_UNS	aIL10+aPD1	RFl17	thirty_six	aIL10+aPD1_thirty_six	UNS	E09
1306	Sample_61	1	170	0.226667	21.9592	22.3588	2.3622	Sample_61	AI_export_Plate 1 UNS LN_F1_F01_CD8p_CD8_live.fcs	RHm17_aIL10_36_UNS	aIL10	RHm17	thirty_six	aIL10_thirty_six	UNS	F01
1307	Sample_61	10	40	0.0533333	17.0258	17.0551	0.964516	Sample_61	AI_export_Plate 1 UNS LN_F1_F01_CD8p_CD8_live.fcs	RHm17_aIL10_36_UNS	aIL10	RHm17	thirty_six	aIL10_thirty_six	UNS	F01
1308	Sample_61	11	30	0.04	18.2876	19.5483	3.77874	Sample_61	AI_export_Plate 1 UNS LN_F1_F01_CD8p_CD8_live.fcs	RHm17_aIL10_36_UNS	aIL10	RHm17	thirty_six	aIL10_thirty_six	UNS	F01
1309	Sample_61	12	5	0.00666667	9.42522	8.39702	2.19213	Sample_61	AI_export_Plate 1 UNS LN_F1_F01_CD8p_CD8_live.fcs	RHm17_aIL10_36_UNS	aIL10	RHm17	thirty_six	aIL10_thirty_six	UNS	F01
1310	Sample_61	13	11	0.0146667	NA	NA	NA	Sample_61	AI_export_Plate 1 UNS LN_F1_F01_CD8p_CD8_live.fcs	RHm17_aIL10_36_UNS	aIL10	RHm17	thirty_six	aIL10_thirty_six	UNS	F01
1311	Sample_61	14	4	0.00533333	9.68996	9.67565	10.8688	Sample_61	AI_export_Plate 1 UNS LN_F1_F01_CD8p_CD8_live.fcs	RHm17_aIL10_36_UNS	aIL10	RHm17	thirty_six	aIL10_thirty_six	UNS	F01
1312	Sample_61	15	0	0	NA	NA	NA	Sample_61	AI_export_Plate 1 UNS LN_F1_F01_CD8p_CD8_live.fcs	RHm17_aIL10_36_UNS	aIL10	RHm17	thirty_six	aIL10_thirty_six	UNS	F01
1313	Sample_61	2	74	0.0986667	4.92319	4.63778	2.9979	Sample_61	AI_export_Plate 1 UNS LN_F1_F01_CD8p_CD8_live.fcs	RHm17_aIL10_36_UNS	aIL10	RHm17	thirty_six	aIL10_thirty_six	UNS	F01
1314	Sample_61	3	43	0.0573333	5.11128	3.80926	3.52062	Sample_61	AI_export_Plate 1 UNS LN_F1_F01_CD8p_CD8_live.fcs	RHm17_aIL10_36_UNS	aIL10	RHm17	thirty_six	aIL10_thirty_six	UNS	F01
1315	Sample_61	4	95	0.126667	NA	NA	NA	Sample_61	AI_export_Plate 1 UNS LN_F1_F01_CD8p_CD8_live.fcs	RHm17_aIL10_36_UNS	aIL10	RHm17	thirty_six	aIL10_thirty_six	UNS	F01
1316	Sample_61	5	81	0.108	18.518	18.9449	2.67861	Sample_61	AI_export_Plate 1 UNS LN_F1_F01_CD8p_CD8_live.fcs	RHm17_aIL10_36_UNS	aIL10	RHm17	thirty_six	aIL10_thirty_six	UNS	F01
1317	Sample_61	6	95	0.126667	18.085	18.085	NA	Sample_61	AI_export_Plate 1 UNS LN_F1_F01_CD8p_CD8_live.fcs	RHm17_aIL10_36_UNS	aIL10	RHm17	thirty_six	aIL10_thirty_six	UNS	F01
1318	Sample_61	7	61	0.0813333	19.3581	19.5037	0.271353	Sample_61	AI_export_Plate 1 UNS LN_F1_F01_CD8p_CD8_live.fcs	RHm17_aIL10_36_UNS	aIL10	RHm17	thirty_six	aIL10_thirty_six	UNS	F01
1319	Sample_61	8	24	0.032	12.418	12.3912	0.903034	Sample_61	AI_export_Plate 1 UNS LN_F1_F01_CD8p_CD8_live.fcs	RHm17_aIL10_36_UNS	aIL10	RHm17	thirty_six	aIL10_thirty_six	UNS	F01
1320	Sample_61	9	17	0.0226667	16.178	15.8914	0.945273	Sample_61	AI_export_Plate 1 UNS LN_F1_F01_CD8p_CD8_live.fcs	RHm17_aIL10_36_UNS	aIL10	RHm17	thirty_six	aIL10_thirty_six	UNS	F01
1321	Sample_62	1	104	0.138667	21.684	21.8274	2.1442	Sample_62	AI_export_Plate 1 UNS LN_F10_F10_CD8p_CD8_live.fcs	RIb17_aIL10+aPD1_36_UNS	aIL10+aPD1	RIb17	thirty_six	aIL10+aPD1_thirty_six	UNS	F10
1322	Sample_62	10	21	0.028	16.3702	16.8965	2.00321	Sample_62	AI_export_Plate 1 UNS LN_F10_F10_CD8p_CD8_live.fcs	RIb17_aIL10+aPD1_36_UNS	aIL10+aPD1	RIb17	thirty_six	aIL10+aPD1_thirty_six	UNS	F10
1323	Sample_62	11	33	0.044	18.1195	19.5483	4.57445	Sample_62	AI_export_Plate 1 UNS LN_F10_F10_CD8p_CD8_live.fcs	RIb17_aIL10+aPD1_36_UNS	aIL10+aPD1	RIb17	thirty_six	aIL10+aPD1_thirty_six	UNS	F10
1324	Sample_62	12	10	0.0133333	8.47872	8.46351	0.485434	Sample_62	AI_export_Plate 1 UNS LN_F10_F10_CD8p_CD8_live.fcs	RIb17_aIL10+aPD1_36_UNS	aIL10+aPD1	RIb17	thirty_six	aIL10+aPD1_thirty_six	UNS	F10
1325	Sample_62	13	16	0.0213333	17.5335	17.5335	NA	Sample_62	AI_export_Plate 1 UNS LN_F10_F10_CD8p_CD8_live.fcs	RIb17_aIL10+aPD1_36_UNS	aIL10+aPD1	RIb17	thirty_six	aIL10+aPD1_thirty_six	UNS	F10
1326	Sample_62	14	0	0	NA	NA	NA	Sample_62	AI_export_Plate 1 UNS LN_F10_F10_CD8p_CD8_live.fcs	RIb17_aIL10+aPD1_36_UNS	aIL10+aPD1	RIb17	thirty_six	aIL10+aPD1_thirty_six	UNS	F10
1327	Sample_62	15	1	0.00133333	24.7633	24.7633	NA	Sample_62	AI_export_Plate 1 UNS LN_F10_F10_CD8p_CD8_live.fcs	RIb17_aIL10+aPD1_36_UNS	aIL10+aPD1	RIb17	thirty_six	aIL10+aPD1_thirty_six	UNS	F10
1328	Sample_62	2	158	0.210667	4.72342	4.71621	2.3694	Sample_62	AI_export_Plate 1 UNS LN_F10_F10_CD8p_CD8_live.fcs	RIb17_aIL10+aPD1_36_UNS	aIL10+aPD1	RIb17	thirty_six	aIL10+aPD1_thirty_six	UNS	F10
1329	Sample_62	3	82	0.109333	3.78563	3.46253	2.47014	Sample_62	AI_export_Plate 1 UNS LN_F10_F10_CD8p_CD8_live.fcs	RIb17_aIL10+aPD1_36_UNS	aIL10+aPD1	RIb17	thirty_six	aIL10+aPD1_thirty_six	UNS	F10
1330	Sample_62	4	87	0.116	NA	NA	NA	Sample_62	AI_export_Plate 1 UNS LN_F10_F10_CD8p_CD8_live.fcs	RIb17_aIL10+aPD1_36_UNS	aIL10+aPD1	RIb17	thirty_six	aIL10+aPD1_thirty_six	UNS	F10
1331	Sample_62	5	94	0.125333	18.8215	18.9397	1.26804	Sample_62	AI_export_Plate 1 UNS LN_F10_F10_CD8p_CD8_live.fcs	RIb17_aIL10+aPD1_36_UNS	aIL10+aPD1	RIb17	thirty_six	aIL10+aPD1_thirty_six	UNS	F10
1332	Sample_62	6	36	0.048	NA	NA	NA	Sample_62	AI_export_Plate 1 UNS LN_F10_F10_CD8p_CD8_live.fcs	RIb17_aIL10+aPD1_36_UNS	aIL10+aPD1	RIb17	thirty_six	aIL10+aPD1_thirty_six	UNS	F10
1333	Sample_62	7	39	0.052	19.5051	19.5961	0.232965	Sample_62	AI_export_Plate 1 UNS LN_F10_F10_CD8p_CD8_live.fcs	RIb17_aIL10+aPD1_36_UNS	aIL10+aPD1	RIb17	thirty_six	aIL10+aPD1_thirty_six	UNS	F10
1334	Sample_62	8	39	0.052	12.2591	11.7791	3.13313	Sample_62	AI_export_Plate 1 UNS LN_F10_F10_CD8p_CD8_live.fcs	RIb17_aIL10+aPD1_36_UNS	aIL10+aPD1	RIb17	thirty_six	aIL10+aPD1_thirty_six	UNS	F10
1335	Sample_62	9	30	0.04	15.9431	15.8914	1.04783	Sample_62	AI_export_Plate 1 UNS LN_F10_F10_CD8p_CD8_live.fcs	RIb17_aIL10+aPD1_36_UNS	aIL10+aPD1	RIb17	thirty_six	aIL10+aPD1_thirty_six	UNS	F10
1336	Sample_63	1	134	0.178667	22.1852	22.4267	2.19153	Sample_63	AI_export_Plate 1 UNS LN_F11_F11_CD8p_CD8_live.fcs	34918_aIL10+aPD1_-1_UNS	aIL10+aPD1	34918	minus_one	aIL10+aPD1_minus_one	UNS	F11
1337	Sample_63	10	15	0.02	12.4698	9.86871	5.91242	Sample_63	AI_export_Plate 1 UNS LN_F11_F11_CD8p_CD8_live.fcs	34918_aIL10+aPD1_-1_UNS	aIL10+aPD1	34918	minus_one	aIL10+aPD1_minus_one	UNS	F11
1338	Sample_63	11	25	0.0333333	19.1112	19.5483	0.955114	Sample_63	AI_export_Plate 1 UNS LN_F11_F11_CD8p_CD8_live.fcs	34918_aIL10+aPD1_-1_UNS	aIL10+aPD1	34918	minus_one	aIL10+aPD1_minus_one	UNS	F11
1339	Sample_63	12	9	0.012	9.28474	8.4328	2.14958	Sample_63	AI_export_Plate 1 UNS LN_F11_F11_CD8p_CD8_live.fcs	34918_aIL10+aPD1_-1_UNS	aIL10+aPD1	34918	minus_one	aIL10+aPD1_minus_one	UNS	F11
1340	Sample_63	13	7	0.00933333	NA	NA	NA	Sample_63	AI_export_Plate 1 UNS LN_F11_F11_CD8p_CD8_live.fcs	34918_aIL10+aPD1_-1_UNS	aIL10+aPD1	34918	minus_one	aIL10+aPD1_minus_one	UNS	F11
1341	Sample_63	14	1	0.00133333	0.56396	0.56396	NA	Sample_63	AI_export_Plate 1 UNS LN_F11_F11_CD8p_CD8_live.fcs	34918_aIL10+aPD1_-1_UNS	aIL10+aPD1	34918	minus_one	aIL10+aPD1_minus_one	UNS	F11
1342	Sample_63	15	0	0	NA	NA	NA	Sample_63	AI_export_Plate 1 UNS LN_F11_F11_CD8p_CD8_live.fcs	34918_aIL10+aPD1_-1_UNS	aIL10+aPD1	34918	minus_one	aIL10+aPD1_minus_one	UNS	F11
1343	Sample_63	2	244	0.325333	4.23011	4.22919	2.26263	Sample_63	AI_export_Plate 1 UNS LN_F11_F11_CD8p_CD8_live.fcs	34918_aIL10+aPD1_-1_UNS	aIL10+aPD1	34918	minus_one	aIL10+aPD1_minus_one	UNS	F11
1344	Sample_63	3	161	0.214667	3.47928	3.26132	2.28223	Sample_63	AI_export_Plate 1 UNS LN_F11_F11_CD8p_CD8_live.fcs	34918_aIL10+aPD1_-1_UNS	aIL10+aPD1	34918	minus_one	aIL10+aPD1_minus_one	UNS	F11
1345	Sample_63	4	37	0.0493333	15.7355	15.7355	NA	Sample_63	AI_export_Plate 1 UNS LN_F11_F11_CD8p_CD8_live.fcs	34918_aIL10+aPD1_-1_UNS	aIL10+aPD1	34918	minus_one	aIL10+aPD1_minus_one	UNS	F11
1346	Sample_63	5	68	0.0906667	18.835	19.1817	1.69804	Sample_63	AI_export_Plate 1 UNS LN_F11_F11_CD8p_CD8_live.fcs	34918_aIL10+aPD1_-1_UNS	aIL10+aPD1	34918	minus_one	aIL10+aPD1_minus_one	UNS	F11
1347	Sample_63	6	7	0.00933333	NA	NA	NA	Sample_63	AI_export_Plate 1 UNS LN_F11_F11_CD8p_CD8_live.fcs	34918_aIL10+aPD1_-1_UNS	aIL10+aPD1	34918	minus_one	aIL10+aPD1_minus_one	UNS	F11
1348	Sample_63	7	8	0.0106667	19.5793	19.5961	0.0326371	Sample_63	AI_export_Plate 1 UNS LN_F11_F11_CD8p_CD8_live.fcs	34918_aIL10+aPD1_-1_UNS	aIL10+aPD1	34918	minus_one	aIL10+aPD1_minus_one	UNS	F11
1349	Sample_63	8	18	0.024	13.498	12.4669	4.27035	Sample_63	AI_export_Plate 1 UNS LN_F11_F11_CD8p_CD8_live.fcs	34918_aIL10+aPD1_-1_UNS	aIL10+aPD1	34918	minus_one	aIL10+aPD1_minus_one	UNS	F11
1350	Sample_63	9	16	0.0213333	16.1333	16.233	1.8976	Sample_63	AI_export_Plate 1 UNS LN_F11_F11_CD8p_CD8_live.fcs	34918_aIL10+aPD1_-1_UNS	aIL10+aPD1	34918	minus_one	aIL10+aPD1_minus_one	UNS	F11
1351	Sample_64	1	175	0.233333	21.9373	22.5751	3.10535	Sample_64	AI_export_Plate 1 UNS LN_F12_F12_CD8p_CD8_live.fcs	RBf17_aIL10+aPD1_-1_UNS	aIL10+aPD1	RBf17	minus_one	aIL10+aPD1_minus_one	UNS	F12
1352	Sample_64	10	14	0.0186667	15.2526	15.7355	2.27699	Sample_64	AI_export_Plate 1 UNS LN_F12_F12_CD8p_CD8_live.fcs	RBf17_aIL10+aPD1_-1_UNS	aIL10+aPD1	RBf17	minus_one	aIL10+aPD1_minus_one	UNS	F12
1353	Sample_64	11	21	0.028	18.7799	19.4874	1.10686	Sample_64	AI_export_Plate 1 UNS LN_F12_F12_CD8p_CD8_live.fcs	RBf17_aIL10+aPD1_-1_UNS	aIL10+aPD1	RBf17	minus_one	aIL10+aPD1_minus_one	UNS	F12
1354	Sample_64	12	5	0.00666667	9.29764	8.49785	2.1312	Sample_64	AI_export_Plate 1 UNS LN_F12_F12_CD8p_CD8_live.fcs	RBf17_aIL10+aPD1_-1_UNS	aIL10+aPD1	RBf17	minus_one	aIL10+aPD1_minus_one	UNS	F12
1355	Sample_64	13	2	0.00266667	NA	NA	NA	Sample_64	AI_export_Plate 1 UNS LN_F12_F12_CD8p_CD8_live.fcs	RBf17_aIL10+aPD1_-1_UNS	aIL10+aPD1	RBf17	minus_one	aIL10+aPD1_minus_one	UNS	F12
1356	Sample_64	14	0	0	NA	NA	NA	Sample_64	AI_export_Plate 1 UNS LN_F12_F12_CD8p_CD8_live.fcs	RBf17_aIL10+aPD1_-1_UNS	aIL10+aPD1	RBf17	minus_one	aIL10+aPD1_minus_one	UNS	F12
1357	Sample_64	15	1	0.00133333	NA	NA	NA	Sample_64	AI_export_Plate 1 UNS LN_F12_F12_CD8p_CD8_live.fcs	RBf17_aIL10+aPD1_-1_UNS	aIL10+aPD1	RBf17	minus_one	aIL10+aPD1_minus_one	UNS	F12
1358	Sample_64	2	168	0.224	4.4879	4.52145	2.89743	Sample_64	AI_export_Plate 1 UNS LN_F12_F12_CD8p_CD8_live.fcs	RBf17_aIL10+aPD1_-1_UNS	aIL10+aPD1	RBf17	minus_one	aIL10+aPD1_minus_one	UNS	F12
1359	Sample_64	3	195	0.26	3.66852	3.57793	1.55428	Sample_64	AI_export_Plate 1 UNS LN_F12_F12_CD8p_CD8_live.fcs	RBf17_aIL10+aPD1_-1_UNS	aIL10+aPD1	RBf17	minus_one	aIL10+aPD1_minus_one	UNS	F12
1360	Sample_64	4	30	0.04	NA	NA	NA	Sample_64	AI_export_Plate 1 UNS LN_F12_F12_CD8p_CD8_live.fcs	RBf17_aIL10+aPD1_-1_UNS	aIL10+aPD1	RBf17	minus_one	aIL10+aPD1_minus_one	UNS	F12
1361	Sample_64	5	62	0.0826667	19.0787	19.2685	1.19428	Sample_64	AI_export_Plate 1 UNS LN_F12_F12_CD8p_CD8_live.fcs	RBf17_aIL10+aPD1_-1_UNS	aIL10+aPD1	RBf17	minus_one	aIL10+aPD1_minus_one	UNS	F12
1362	Sample_64	6	11	0.0146667	NA	NA	NA	Sample_64	AI_export_Plate 1 UNS LN_F12_F12_CD8p_CD8_live.fcs	RBf17_aIL10+aPD1_-1_UNS	aIL10+aPD1	RBf17	minus_one	aIL10+aPD1_minus_one	UNS	F12
1363	Sample_64	7	13	0.0173333	19.5808	19.5961	0.03067	Sample_64	AI_export_Plate 1 UNS LN_F12_F12_CD8p_CD8_live.fcs	RBf17_aIL10+aPD1_-1_UNS	aIL10+aPD1	RBf17	minus_one	aIL10+aPD1_minus_one	UNS	F12
1364	Sample_64	8	29	0.0386667	11.7084	11.7873	1.41685	Sample_64	AI_export_Plate 1 UNS LN_F12_F12_CD8p_CD8_live.fcs	RBf17_aIL10+aPD1_-1_UNS	aIL10+aPD1	RBf17	minus_one	aIL10+aPD1_minus_one	UNS	F12
1365	Sample_64	9	24	0.032	16.0671	15.9117	1.01553	Sample_64	AI_export_Plate 1 UNS LN_F12_F12_CD8p_CD8_live.fcs	RBf17_aIL10+aPD1_-1_UNS	aIL10+aPD1	RBf17	minus_one	aIL10+aPD1_minus_one	UNS	F12
1366	Sample_65	1	116	0.154667	21.2377	21.3244	3.03017	Sample_65	AI_export_Plate 1 UNS LN_F2_F02_CD8p_CD8_live.fcs	RNy16_aIL10+aPD1_36_UNS	aIL10+aPD1	RNy16	thirty_six	aIL10+aPD1_thirty_six	UNS	F02
1367	Sample_65	10	24	0.032	16.2305	15.9933	2.16608	Sample_65	AI_export_Plate 1 UNS LN_F2_F02_CD8p_CD8_live.fcs	RNy16_aIL10+aPD1_36_UNS	aIL10+aPD1	RNy16	thirty_six	aIL10+aPD1_thirty_six	UNS	F02
1368	Sample_65	11	33	0.044	18.9777	19.5483	3.06252	Sample_65	AI_export_Plate 1 UNS LN_F2_F02_CD8p_CD8_live.fcs	RNy16_aIL10+aPD1_36_UNS	aIL10+aPD1	RNy16	thirty_six	aIL10+aPD1_thirty_six	UNS	F02
1369	Sample_65	12	14	0.0186667	8.86905	8.78712	2.72496	Sample_65	AI_export_Plate 1 UNS LN_F2_F02_CD8p_CD8_live.fcs	RNy16_aIL10+aPD1_36_UNS	aIL10+aPD1	RNy16	thirty_six	aIL10+aPD1_thirty_six	UNS	F02
1370	Sample_65	13	17	0.0226667	NA	NA	NA	Sample_65	AI_export_Plate 1 UNS LN_F2_F02_CD8p_CD8_live.fcs	RNy16_aIL10+aPD1_36_UNS	aIL10+aPD1	RNy16	thirty_six	aIL10+aPD1_thirty_six	UNS	F02
1371	Sample_65	14	0	0	NA	NA	NA	Sample_65	AI_export_Plate 1 UNS LN_F2_F02_CD8p_CD8_live.fcs	RNy16_aIL10+aPD1_36_UNS	aIL10+aPD1	RNy16	thirty_six	aIL10+aPD1_thirty_six	UNS	F02
1372	Sample_65	15	3	0.004	9.34254	9.34254	8.62169e-10	Sample_65	AI_export_Plate 1 UNS LN_F2_F02_CD8p_CD8_live.fcs	RNy16_aIL10+aPD1_36_UNS	aIL10+aPD1	RNy16	thirty_six	aIL10+aPD1_thirty_six	UNS	F02
1373	Sample_65	2	111	0.148	4.51251	4.52145	2.16365	Sample_65	AI_export_Plate 1 UNS LN_F2_F02_CD8p_CD8_live.fcs	RNy16_aIL10+aPD1_36_UNS	aIL10+aPD1	RNy16	thirty_six	aIL10+aPD1_thirty_six	UNS	F02
1374	Sample_65	3	93	0.124	3.96937	3.66676	2.19274	Sample_65	AI_export_Plate 1 UNS LN_F2_F02_CD8p_CD8_live.fcs	RNy16_aIL10+aPD1_36_UNS	aIL10+aPD1	RNy16	thirty_six	aIL10+aPD1_thirty_six	UNS	F02
1375	Sample_65	4	137	0.182667	22.0472	22.0472	NA	Sample_65	AI_export_Plate 1 UNS LN_F2_F02_CD8p_CD8_live.fcs	RNy16_aIL10+aPD1_36_UNS	aIL10+aPD1	RNy16	thirty_six	aIL10+aPD1_thirty_six	UNS	F02
1376	Sample_65	5	69	0.092	18.6524	18.8666	1.23244	Sample_65	AI_export_Plate 1 UNS LN_F2_F02_CD8p_CD8_live.fcs	RNy16_aIL10+aPD1_36_UNS	aIL10+aPD1	RNy16	thirty_six	aIL10+aPD1_thirty_six	UNS	F02
1377	Sample_65	6	40	0.0533333	NA	NA	NA	Sample_65	AI_export_Plate 1 UNS LN_F2_F02_CD8p_CD8_live.fcs	RNy16_aIL10+aPD1_36_UNS	aIL10+aPD1	RNy16	thirty_six	aIL10+aPD1_thirty_six	UNS	F02
1378	Sample_65	7	28	0.0373333	19.5574	19.5961	0.139675	Sample_65	AI_export_Plate 1 UNS LN_F2_F02_CD8p_CD8_live.fcs	RNy16_aIL10+aPD1_36_UNS	aIL10+aPD1	RNy16	thirty_six	aIL10+aPD1_thirty_six	UNS	F02
1379	Sample_65	8	44	0.0586667	11.6198	12.2185	1.30239	Sample_65	AI_export_Plate 1 UNS LN_F2_F02_CD8p_CD8_live.fcs	RNy16_aIL10+aPD1_36_UNS	aIL10+aPD1	RNy16	thirty_six	aIL10+aPD1_thirty_six	UNS	F02
1380	Sample_65	9	21	0.028	16.1096	15.8914	1.66039	Sample_65	AI_export_Plate 1 UNS LN_F2_F02_CD8p_CD8_live.fcs	RNy16_aIL10+aPD1_36_UNS	aIL10+aPD1	RNy16	thirty_six	aIL10+aPD1_thirty_six	UNS	F02
1381	Sample_66	1	89	0.118667	21.6779	22.6496	3.37273	Sample_66	AI_export_Plate 1 UNS LN_F3_F03_CD8p_CD8_live.fcs	RTd17_Control_36_UNS	Control	RTd17	thirty_six	Control_thirty_six	UNS	F03
1382	Sample_66	10	77	0.102667	15.8896	15.9002	2.36885	Sample_66	AI_export_Plate 1 UNS LN_F3_F03_CD8p_CD8_live.fcs	RTd17_Control_36_UNS	Control	RTd17	thirty_six	Control_thirty_six	UNS	F03
1383	Sample_66	11	58	0.0773333	18.4074	19.5483	3.0808	Sample_66	AI_export_Plate 1 UNS LN_F3_F03_CD8p_CD8_live.fcs	RTd17_Control_36_UNS	Control	RTd17	thirty_six	Control_thirty_six	UNS	F03
1384	Sample_66	12	3	0.004	8.72906	9.34254	1.14927	Sample_66	AI_export_Plate 1 UNS LN_F3_F03_CD8p_CD8_live.fcs	RTd17_Control_36_UNS	Control	RTd17	thirty_six	Control_thirty_six	UNS	F03
1385	Sample_66	13	17	0.0226667	NA	NA	NA	Sample_66	AI_export_Plate 1 UNS LN_F3_F03_CD8p_CD8_live.fcs	RTd17_Control_36_UNS	Control	RTd17	thirty_six	Control_thirty_six	UNS	F03
1386	Sample_66	14	1	0.00133333	14.9208	14.9208	NA	Sample_66	AI_export_Plate 1 UNS LN_F3_F03_CD8p_CD8_live.fcs	RTd17_Control_36_UNS	Control	RTd17	thirty_six	Control_thirty_six	UNS	F03
1387	Sample_66	15	6	0.008	20.9081	24.7633	7.71038	Sample_66	AI_export_Plate 1 UNS LN_F3_F03_CD8p_CD8_live.fcs	RTd17_Control_36_UNS	Control	RTd17	thirty_six	Control_thirty_six	UNS	F03
1388	Sample_66	2	50	0.0666667	5.86835	5.42579	3.68347	Sample_66	AI_export_Plate 1 UNS LN_F3_F03_CD8p_CD8_live.fcs	RTd17_Control_36_UNS	Control	RTd17	thirty_six	Control_thirty_six	UNS	F03
1389	Sample_66	3	30	0.04	4.11978	3.679	2.4131	Sample_66	AI_export_Plate 1 UNS LN_F3_F03_CD8p_CD8_live.fcs	RTd17_Control_36_UNS	Control	RTd17	thirty_six	Control_thirty_six	UNS	F03
1390	Sample_66	4	191	0.254667	14.7299	14.7299	NA	Sample_66	AI_export_Plate 1 UNS LN_F3_F03_CD8p_CD8_live.fcs	RTd17_Control_36_UNS	Control	RTd17	thirty_six	Control_thirty_six	UNS	F03
1391	Sample_66	5	48	0.064	18.2055	18.5202	1.68871	Sample_66	AI_export_Plate 1 UNS LN_F3_F03_CD8p_CD8_live.fcs	RTd17_Control_36_UNS	Control	RTd17	thirty_six	Control_thirty_six	UNS	F03
1392	Sample_66	6	94	0.125333	19.1091	19.1091	NA	Sample_66	AI_export_Plate 1 UNS LN_F3_F03_CD8p_CD8_live.fcs	RTd17_Control_36_UNS	Control	RTd17	thirty_six	Control_thirty_six	UNS	F03
1393	Sample_66	7	41	0.0546667	19.325	19.5113	0.328389	Sample_66	AI_export_Plate 1 UNS LN_F3_F03_CD8p_CD8_live.fcs	RTd17_Control_36_UNS	Control	RTd17	thirty_six	Control_thirty_six	UNS	F03
1394	Sample_66	8	10	0.0133333	11.8332	12.0739	1.40031	Sample_66	AI_export_Plate 1 UNS LN_F3_F03_CD8p_CD8_live.fcs	RTd17_Control_36_UNS	Control	RTd17	thirty_six	Control_thirty_six	UNS	F03
1395	Sample_66	9	35	0.0466667	15.2878	15.597	1.3537	Sample_66	AI_export_Plate 1 UNS LN_F3_F03_CD8p_CD8_live.fcs	RTd17_Control_36_UNS	Control	RTd17	thirty_six	Control_thirty_six	UNS	F03
1396	Sample_67	1	58	0.0773333	21.6358	21.9969	2.72053	Sample_67	AI_export_Plate 1 UNS LN_F4_F04_CD8p_CD8_live.fcs	34897_aIL10_36_UNS	aIL10	34897	thirty_six	aIL10_thirty_six	UNS	F04
1397	Sample_67	10	79	0.105333	16.0727	15.7488	1.08853	Sample_67	AI_export_Plate 1 UNS LN_F4_F04_CD8p_CD8_live.fcs	34897_aIL10_36_UNS	aIL10	34897	thirty_six	aIL10_thirty_six	UNS	F04
1398	Sample_67	11	13	0.0173333	19.5381	19.5483	0.0395179	Sample_67	AI_export_Plate 1 UNS LN_F4_F04_CD8p_CD8_live.fcs	34897_aIL10_36_UNS	aIL10	34897	thirty_six	aIL10_thirty_six	UNS	F04
1399	Sample_67	12	5	0.00666667	10.1442	8.92673	3.08336	Sample_67	AI_export_Plate 1 UNS LN_F4_F04_CD8p_CD8_live.fcs	34897_aIL10_36_UNS	aIL10	34897	thirty_six	aIL10_thirty_six	UNS	F04
1400	Sample_67	13	43	0.0573333	17.3125	17.3125	0.896531	Sample_67	AI_export_Plate 1 UNS LN_F4_F04_CD8p_CD8_live.fcs	34897_aIL10_36_UNS	aIL10	34897	thirty_six	aIL10_thirty_six	UNS	F04
1401	Sample_67	14	1	0.00133333	0.56396	0.56396	NA	Sample_67	AI_export_Plate 1 UNS LN_F4_F04_CD8p_CD8_live.fcs	34897_aIL10_36_UNS	aIL10	34897	thirty_six	aIL10_thirty_six	UNS	F04
1402	Sample_67	15	0	0	NA	NA	NA	Sample_67	AI_export_Plate 1 UNS LN_F4_F04_CD8p_CD8_live.fcs	34897_aIL10_36_UNS	aIL10	34897	thirty_six	aIL10_thirty_six	UNS	F04
1403	Sample_67	2	66	0.088	4.71157	4.49311	2.00996	Sample_67	AI_export_Plate 1 UNS LN_F4_F04_CD8p_CD8_live.fcs	34897_aIL10_36_UNS	aIL10	34897	thirty_six	aIL10_thirty_six	UNS	F04
1404	Sample_67	3	74	0.0986667	4.85855	3.81035	2.84377	Sample_67	AI_export_Plate 1 UNS LN_F4_F04_CD8p_CD8_live.fcs	34897_aIL10_36_UNS	aIL10	34897	thirty_six	aIL10_thirty_six	UNS	F04
1405	Sample_67	4	194	0.258667	21.7313	21.7313	NA	Sample_67	AI_export_Plate 1 UNS LN_F4_F04_CD8p_CD8_live.fcs	34897_aIL10_36_UNS	aIL10	34897	thirty_six	aIL10_thirty_six	UNS	F04
1406	Sample_67	5	49	0.0653333	18.5213	19.2606	2.29815	Sample_67	AI_export_Plate 1 UNS LN_F4_F04_CD8p_CD8_live.fcs	34897_aIL10_36_UNS	aIL10	34897	thirty_six	aIL10_thirty_six	UNS	F04
1407	Sample_67	6	77	0.102667	18.6864	18.6864	0.0293445	Sample_67	AI_export_Plate 1 UNS LN_F4_F04_CD8p_CD8_live.fcs	34897_aIL10_36_UNS	aIL10	34897	thirty_six	aIL10_thirty_six	UNS	F04
1408	Sample_67	7	24	0.032	19.2	19.1091	0.35749	Sample_67	AI_export_Plate 1 UNS LN_F4_F04_CD8p_CD8_live.fcs	34897_aIL10_36_UNS	aIL10	34897	thirty_six	aIL10_thirty_six	UNS	F04
1409	Sample_67	8	18	0.024	11.6163	11.5343	1.20301	Sample_67	AI_export_Plate 1 UNS LN_F4_F04_CD8p_CD8_live.fcs	34897_aIL10_36_UNS	aIL10	34897	thirty_six	aIL10_thirty_six	UNS	F04
1410	Sample_67	9	49	0.0653333	15.9024	15.8196	0.984065	Sample_67	AI_export_Plate 1 UNS LN_F4_F04_CD8p_CD8_live.fcs	34897_aIL10_36_UNS	aIL10	34897	thirty_six	aIL10_thirty_six	UNS	F04
1411	Sample_68	1	107	0.142667	21.2558	21.6153	2.95334	Sample_68	AI_export_Plate 1 UNS LN_F5_F05_CD8p_CD8_live.fcs	RRh17_aIL10+aPD1_36_UNS	aIL10+aPD1	RRh17	thirty_six	aIL10+aPD1_thirty_six	UNS	F05
1412	Sample_68	10	15	0.02	16.399	17.5335	2.96438	Sample_68	AI_export_Plate 1 UNS LN_F5_F05_CD8p_CD8_live.fcs	RRh17_aIL10+aPD1_36_UNS	aIL10+aPD1	RRh17	thirty_six	aIL10+aPD1_thirty_six	UNS	F05
1413	Sample_68	11	31	0.0413333	17.6768	19.5483	4.62985	Sample_68	AI_export_Plate 1 UNS LN_F5_F05_CD8p_CD8_live.fcs	RRh17_aIL10+aPD1_36_UNS	aIL10+aPD1	RRh17	thirty_six	aIL10+aPD1_thirty_six	UNS	F05
1414	Sample_68	12	7	0.00933333	9.89725	8.40946	3.24367	Sample_68	AI_export_Plate 1 UNS LN_F5_F05_CD8p_CD8_live.fcs	RRh17_aIL10+aPD1_36_UNS	aIL10+aPD1	RRh17	thirty_six	aIL10+aPD1_thirty_six	UNS	F05
1415	Sample_68	13	6	0.008	NA	NA	NA	Sample_68	AI_export_Plate 1 UNS LN_F5_F05_CD8p_CD8_live.fcs	RRh17_aIL10+aPD1_36_UNS	aIL10+aPD1	RRh17	thirty_six	aIL10+aPD1_thirty_six	UNS	F05
1416	Sample_68	14	0	0	NA	NA	NA	Sample_68	AI_export_Plate 1 UNS LN_F5_F05_CD8p_CD8_live.fcs	RRh17_aIL10+aPD1_36_UNS	aIL10+aPD1	RRh17	thirty_six	aIL10+aPD1_thirty_six	UNS	F05
1417	Sample_68	15	1	0.00133333	NA	NA	NA	Sample_68	AI_export_Plate 1 UNS LN_F5_F05_CD8p_CD8_live.fcs	RRh17_aIL10+aPD1_36_UNS	aIL10+aPD1	RRh17	thirty_six	aIL10+aPD1_thirty_six	UNS	F05
1418	Sample_68	2	190	0.253333	4.23957	4.52252	2.29848	Sample_68	AI_export_Plate 1 UNS LN_F5_F05_CD8p_CD8_live.fcs	RRh17_aIL10+aPD1_36_UNS	aIL10+aPD1	RRh17	thirty_six	aIL10+aPD1_thirty_six	UNS	F05
1419	Sample_68	3	120	0.16	4.14379	3.66676	2.73588	Sample_68	AI_export_Plate 1 UNS LN_F5_F05_CD8p_CD8_live.fcs	RRh17_aIL10+aPD1_36_UNS	aIL10+aPD1	RRh17	thirty_six	aIL10+aPD1_thirty_six	UNS	F05
1420	Sample_68	4	31	0.0413333	NA	NA	NA	Sample_68	AI_export_Plate 1 UNS LN_F5_F05_CD8p_CD8_live.fcs	RRh17_aIL10+aPD1_36_UNS	aIL10+aPD1	RRh17	thirty_six	aIL10+aPD1_thirty_six	UNS	F05
1421	Sample_68	5	83	0.110667	18.4009	18.7755	2.3254	Sample_68	AI_export_Plate 1 UNS LN_F5_F05_CD8p_CD8_live.fcs	RRh17_aIL10+aPD1_36_UNS	aIL10+aPD1	RRh17	thirty_six	aIL10+aPD1_thirty_six	UNS	F05
1422	Sample_68	6	25	0.0333333	18.0798	18.0798	NA	Sample_68	AI_export_Plate 1 UNS LN_F5_F05_CD8p_CD8_live.fcs	RRh17_aIL10+aPD1_36_UNS	aIL10+aPD1	RRh17	thirty_six	aIL10+aPD1_thirty_six	UNS	F05
1423	Sample_68	7	41	0.0546667	19.5424	19.5961	0.444158	Sample_68	AI_export_Plate 1 UNS LN_F5_F05_CD8p_CD8_live.fcs	RRh17_aIL10+aPD1_36_UNS	aIL10+aPD1	RRh17	thirty_six	aIL10+aPD1_thirty_six	UNS	F05
1424	Sample_68	8	31	0.0413333	12.2794	11.9405	2.27468	Sample_68	AI_export_Plate 1 UNS LN_F5_F05_CD8p_CD8_live.fcs	RRh17_aIL10+aPD1_36_UNS	aIL10+aPD1	RRh17	thirty_six	aIL10+aPD1_thirty_six	UNS	F05
1425	Sample_68	9	62	0.0826667	15.7693	15.8914	0.920078	Sample_68	AI_export_Plate 1 UNS LN_F5_F05_CD8p_CD8_live.fcs	RRh17_aIL10+aPD1_36_UNS	aIL10+aPD1	RRh17	thirty_six	aIL10+aPD1_thirty_six	UNS	F05
1426	Sample_69	1	42	0.056	20.9162	22.3048	4.15051	Sample_69	AI_export_Plate 1 UNS LN_F6_F06_CD8p_CD8_live.fcs	RFn17_aIL10_36_UNS	aIL10	RFn17	thirty_six	aIL10_thirty_six	UNS	F06
1427	Sample_69	10	40	0.0533333	15.8228	16.287	2.04799	Sample_69	AI_export_Plate 1 UNS LN_F6_F06_CD8p_CD8_live.fcs	RFn17_aIL10_36_UNS	aIL10	RFn17	thirty_six	aIL10_thirty_six	UNS	F06
1428	Sample_69	11	13	0.0173333	18.0927	19.5483	4.91335	Sample_69	AI_export_Plate 1 UNS LN_F6_F06_CD8p_CD8_live.fcs	RFn17_aIL10_36_UNS	aIL10	RFn17	thirty_six	aIL10_thirty_six	UNS	F06
1429	Sample_69	12	13	0.0173333	7.54516	7.88295	1.71868	Sample_69	AI_export_Plate 1 UNS LN_F6_F06_CD8p_CD8_live.fcs	RFn17_aIL10_36_UNS	aIL10	RFn17	thirty_six	aIL10_thirty_six	UNS	F06
1430	Sample_69	13	16	0.0213333	NA	NA	NA	Sample_69	AI_export_Plate 1 UNS LN_F6_F06_CD8p_CD8_live.fcs	RFn17_aIL10_36_UNS	aIL10	RFn17	thirty_six	aIL10_thirty_six	UNS	F06
1431	Sample_69	14	2	0.00266667	12.0616	12.0616	16.2602	Sample_69	AI_export_Plate 1 UNS LN_F6_F06_CD8p_CD8_live.fcs	RFn17_aIL10_36_UNS	aIL10	RFn17	thirty_six	aIL10_thirty_six	UNS	F06
1432	Sample_69	15	0	0	NA	NA	NA	Sample_69	AI_export_Plate 1 UNS LN_F6_F06_CD8p_CD8_live.fcs	RFn17_aIL10_36_UNS	aIL10	RFn17	thirty_six	aIL10_thirty_six	UNS	F06
1433	Sample_69	2	180	0.24	4.2027	4.08921	2.55341	Sample_69	AI_export_Plate 1 UNS LN_F6_F06_CD8p_CD8_live.fcs	RFn17_aIL10_36_UNS	aIL10	RFn17	thirty_six	aIL10_thirty_six	UNS	F06
1434	Sample_69	3	117	0.156	4.12369	3.66676	1.89755	Sample_69	AI_export_Plate 1 UNS LN_F6_F06_CD8p_CD8_live.fcs	RFn17_aIL10_36_UNS	aIL10	RFn17	thirty_six	aIL10_thirty_six	UNS	F06
1435	Sample_69	4	125	0.166667	3.03879	3.03879	NA	Sample_69	AI_export_Plate 1 UNS LN_F6_F06_CD8p_CD8_live.fcs	RFn17_aIL10_36_UNS	aIL10	RFn17	thirty_six	aIL10_thirty_six	UNS	F06
1436	Sample_69	5	37	0.0493333	18.4137	18.715	1.23355	Sample_69	AI_export_Plate 1 UNS LN_F6_F06_CD8p_CD8_live.fcs	RFn17_aIL10_36_UNS	aIL10	RFn17	thirty_six	aIL10_thirty_six	UNS	F06
1437	Sample_69	6	90	0.12	19.5961	19.5961	NA	Sample_69	AI_export_Plate 1 UNS LN_F6_F06_CD8p_CD8_live.fcs	RFn17_aIL10_36_UNS	aIL10	RFn17	thirty_six	aIL10_thirty_six	UNS	F06
1438	Sample_69	7	19	0.0253333	19.1875	19.1091	0.371437	Sample_69	AI_export_Plate 1 UNS LN_F6_F06_CD8p_CD8_live.fcs	RFn17_aIL10_36_UNS	aIL10	RFn17	thirty_six	aIL10_thirty_six	UNS	F06
1439	Sample_69	8	22	0.0293333	12.3327	12.4791	2.06611	Sample_69	AI_export_Plate 1 UNS LN_F6_F06_CD8p_CD8_live.fcs	RFn17_aIL10_36_UNS	aIL10	RFn17	thirty_six	aIL10_thirty_six	UNS	F06
1440	Sample_69	9	34	0.0453333	15.7947	15.8914	1.22746	Sample_69	AI_export_Plate 1 UNS LN_F6_F06_CD8p_CD8_live.fcs	RFn17_aIL10_36_UNS	aIL10	RFn17	thirty_six	aIL10_thirty_six	UNS	F06
1441	Sample_7	1	157	0.209333	21.6458	21.685	2.65124	Sample_7	AI_export_Plate 1 UNS LN_A4_A04_CD8p_CD8_live.fcs	RYm17_aIL10+aPD1_-1_UNS	aIL10+aPD1	RYm17	minus_one	aIL10+aPD1_minus_one	UNS	A04
1442	Sample_7	10	14	0.0186667	15.4486	16.2644	3.01672	Sample_7	AI_export_Plate 1 UNS LN_A4_A04_CD8p_CD8_live.fcs	RYm17_aIL10+aPD1_-1_UNS	aIL10+aPD1	RYm17	minus_one	aIL10+aPD1_minus_one	UNS	A04
1443	Sample_7	11	29	0.0386667	18.5762	19.5483	1.58042	Sample_7	AI_export_Plate 1 UNS LN_A4_A04_CD8p_CD8_live.fcs	RYm17_aIL10+aPD1_-1_UNS	aIL10+aPD1	RYm17	minus_one	aIL10+aPD1_minus_one	UNS	A04
1444	Sample_7	12	10	0.0133333	7.88016	8.36397	1.5975	Sample_7	AI_export_Plate 1 UNS LN_A4_A04_CD8p_CD8_live.fcs	RYm17_aIL10+aPD1_-1_UNS	aIL10+aPD1	RYm17	minus_one	aIL10+aPD1_minus_one	UNS	A04
1445	Sample_7	13	9	0.012	12.2376	12.2376	NA	Sample_7	AI_export_Plate 1 UNS LN_A4_A04_CD8p_CD8_live.fcs	RYm17_aIL10+aPD1_-1_UNS	aIL10+aPD1	RYm17	minus_one	aIL10+aPD1_minus_one	UNS	A04
1446	Sample_7	14	0	0	NA	NA	NA	Sample_7	AI_export_Plate 1 UNS LN_A4_A04_CD8p_CD8_live.fcs	RYm17_aIL10+aPD1_-1_UNS	aIL10+aPD1	RYm17	minus_one	aIL10+aPD1_minus_one	UNS	A04
1447	Sample_7	15	1	0.00133333	NA	NA	NA	Sample_7	AI_export_Plate 1 UNS LN_A4_A04_CD8p_CD8_live.fcs	RYm17_aIL10+aPD1_-1_UNS	aIL10+aPD1	RYm17	minus_one	aIL10+aPD1_minus_one	UNS	A04
1448	Sample_7	2	146	0.194667	4.74707	4.71621	2.44026	Sample_7	AI_export_Plate 1 UNS LN_A4_A04_CD8p_CD8_live.fcs	RYm17_aIL10+aPD1_-1_UNS	aIL10+aPD1	RYm17	minus_one	aIL10+aPD1_minus_one	UNS	A04
1449	Sample_7	3	80	0.106667	5.01708	3.80926	4.39515	Sample_7	AI_export_Plate 1 UNS LN_A4_A04_CD8p_CD8_live.fcs	RYm17_aIL10+aPD1_-1_UNS	aIL10+aPD1	RYm17	minus_one	aIL10+aPD1_minus_one	UNS	A04
1450	Sample_7	4	54	0.072	NA	NA	NA	Sample_7	AI_export_Plate 1 UNS LN_A4_A04_CD8p_CD8_live.fcs	RYm17_aIL10+aPD1_-1_UNS	aIL10+aPD1	RYm17	minus_one	aIL10+aPD1_minus_one	UNS	A04
1451	Sample_7	5	114	0.152	18.423	18.8325	2.05421	Sample_7	AI_export_Plate 1 UNS LN_A4_A04_CD8p_CD8_live.fcs	RYm17_aIL10+aPD1_-1_UNS	aIL10+aPD1	RYm17	minus_one	aIL10+aPD1_minus_one	UNS	A04
1452	Sample_7	6	15	0.02	NA	NA	NA	Sample_7	AI_export_Plate 1 UNS LN_A4_A04_CD8p_CD8_live.fcs	RYm17_aIL10+aPD1_-1_UNS	aIL10+aPD1	RYm17	minus_one	aIL10+aPD1_minus_one	UNS	A04
1453	Sample_7	7	14	0.0186667	19.558	19.5961	0.143261	Sample_7	AI_export_Plate 1 UNS LN_A4_A04_CD8p_CD8_live.fcs	RYm17_aIL10+aPD1_-1_UNS	aIL10+aPD1	RYm17	minus_one	aIL10+aPD1_minus_one	UNS	A04
1454	Sample_7	8	92	0.122667	11.6418	11.7654	1.69452	Sample_7	AI_export_Plate 1 UNS LN_A4_A04_CD8p_CD8_live.fcs	RYm17_aIL10+aPD1_-1_UNS	aIL10+aPD1	RYm17	minus_one	aIL10+aPD1_minus_one	UNS	A04
1455	Sample_7	9	15	0.02	15.9335	15.8035	1.03011	Sample_7	AI_export_Plate 1 UNS LN_A4_A04_CD8p_CD8_live.fcs	RYm17_aIL10+aPD1_-1_UNS	aIL10+aPD1	RYm17	minus_one	aIL10+aPD1_minus_one	UNS	A04
1456	Sample_70	1	80	0.106667	21.3429	21.7686	2.80353	Sample_70	AI_export_Plate 1 UNS LN_F7_F07_CD8p_CD8_live.fcs	RVm17_aIL10_36_UNS	aIL10	RVm17	thirty_six	aIL10_thirty_six	UNS	F07
1457	Sample_70	10	61	0.0813333	15.7338	15.9927	2.21376	Sample_70	AI_export_Plate 1 UNS LN_F7_F07_CD8p_CD8_live.fcs	RVm17_aIL10_36_UNS	aIL10	RVm17	thirty_six	aIL10_thirty_six	UNS	F07
1458	Sample_70	11	24	0.032	18.4386	19.5483	3.47927	Sample_70	AI_export_Plate 1 UNS LN_F7_F07_CD8p_CD8_live.fcs	RVm17_aIL10_36_UNS	aIL10	RVm17	thirty_six	aIL10_thirty_six	UNS	F07
1459	Sample_70	12	5	0.00666667	8.5314	8.40946	0.568047	Sample_70	AI_export_Plate 1 UNS LN_F7_F07_CD8p_CD8_live.fcs	RVm17_aIL10_36_UNS	aIL10	RVm17	thirty_six	aIL10_thirty_six	UNS	F07
1460	Sample_70	13	21	0.028	12.2376	12.2376	NA	Sample_70	AI_export_Plate 1 UNS LN_F7_F07_CD8p_CD8_live.fcs	RVm17_aIL10_36_UNS	aIL10	RVm17	thirty_six	aIL10_thirty_six	UNS	F07
1461	Sample_70	14	0	0	NA	NA	NA	Sample_70	AI_export_Plate 1 UNS LN_F7_F07_CD8p_CD8_live.fcs	RVm17_aIL10_36_UNS	aIL10	RVm17	thirty_six	aIL10_thirty_six	UNS	F07
1462	Sample_70	15	1	0.00133333	9.04525	9.04525	NA	Sample_70	AI_export_Plate 1 UNS LN_F7_F07_CD8p_CD8_live.fcs	RVm17_aIL10_36_UNS	aIL10	RVm17	thirty_six	aIL10_thirty_six	UNS	F07
1463	Sample_70	2	94	0.125333	4.57344	4.28933	2.31456	Sample_70	AI_export_Plate 1 UNS LN_F7_F07_CD8p_CD8_live.fcs	RVm17_aIL10_36_UNS	aIL10	RVm17	thirty_six	aIL10_thirty_six	UNS	F07
1464	Sample_70	3	104	0.138667	3.93502	3.70967	1.66499	Sample_70	AI_export_Plate 1 UNS LN_F7_F07_CD8p_CD8_live.fcs	RVm17_aIL10_36_UNS	aIL10	RVm17	thirty_six	aIL10_thirty_six	UNS	F07
1465	Sample_70	4	148	0.197333	14.9385	15.7355	1.84502	Sample_70	AI_export_Plate 1 UNS LN_F7_F07_CD8p_CD8_live.fcs	RVm17_aIL10_36_UNS	aIL10	RVm17	thirty_six	aIL10_thirty_six	UNS	F07
1466	Sample_70	5	52	0.0693333	18.6282	19.1466	1.93958	Sample_70	AI_export_Plate 1 UNS LN_F7_F07_CD8p_CD8_live.fcs	RVm17_aIL10_36_UNS	aIL10	RVm17	thirty_six	aIL10_thirty_six	UNS	F07
1467	Sample_70	6	55	0.0733333	19.523	19.523	NA	Sample_70	AI_export_Plate 1 UNS LN_F7_F07_CD8p_CD8_live.fcs	RVm17_aIL10_36_UNS	aIL10	RVm17	thirty_six	aIL10_thirty_six	UNS	F07
1468	Sample_70	7	24	0.032	19.4191	19.5961	0.238271	Sample_70	AI_export_Plate 1 UNS LN_F7_F07_CD8p_CD8_live.fcs	RVm17_aIL10_36_UNS	aIL10	RVm17	thirty_six	aIL10_thirty_six	UNS	F07
1469	Sample_70	8	28	0.0373333	11.5585	11.9383	1.37143	Sample_70	AI_export_Plate 1 UNS LN_F7_F07_CD8p_CD8_live.fcs	RVm17_aIL10_36_UNS	aIL10	RVm17	thirty_six	aIL10_thirty_six	UNS	F07
1470	Sample_70	9	53	0.0706667	15.7452	15.8914	1.25885	Sample_70	AI_export_Plate 1 UNS LN_F7_F07_CD8p_CD8_live.fcs	RVm17_aIL10_36_UNS	aIL10	RVm17	thirty_six	aIL10_thirty_six	UNS	F07
1471	Sample_71	1	49	0.0653333	20.6789	20.9826	3.1321	Sample_71	AI_export_Plate 1 UNS LN_F8_F08_CD8p_CD8_live.fcs	RBe17_Control_36_UNS	Control	RBe17	thirty_six	Control_thirty_six	UNS	F08
1472	Sample_71	10	43	0.0573333	16.2673	16.6688	1.82767	Sample_71	AI_export_Plate 1 UNS LN_F8_F08_CD8p_CD8_live.fcs	RBe17_Control_36_UNS	Control	RBe17	thirty_six	Control_thirty_six	UNS	F08
1473	Sample_71	11	16	0.0213333	19.596	19.5483	0.493304	Sample_71	AI_export_Plate 1 UNS LN_F8_F08_CD8p_CD8_live.fcs	RBe17_Control_36_UNS	Control	RBe17	thirty_six	Control_thirty_six	UNS	F08
1474	Sample_71	12	6	0.008	8.58021	8.42206	0.43183	Sample_71	AI_export_Plate 1 UNS LN_F8_F08_CD8p_CD8_live.fcs	RBe17_Control_36_UNS	Control	RBe17	thirty_six	Control_thirty_six	UNS	F08
1475	Sample_71	13	63	0.084	NA	NA	NA	Sample_71	AI_export_Plate 1 UNS LN_F8_F08_CD8p_CD8_live.fcs	RBe17_Control_36_UNS	Control	RBe17	thirty_six	Control_thirty_six	UNS	F08
1476	Sample_71	14	0	0	NA	NA	NA	Sample_71	AI_export_Plate 1 UNS LN_F8_F08_CD8p_CD8_live.fcs	RBe17_Control_36_UNS	Control	RBe17	thirty_six	Control_thirty_six	UNS	F08
1477	Sample_71	15	2	0.00266667	NA	NA	NA	Sample_71	AI_export_Plate 1 UNS LN_F8_F08_CD8p_CD8_live.fcs	RBe17_Control_36_UNS	Control	RBe17	thirty_six	Control_thirty_six	UNS	F08
1478	Sample_71	2	127	0.169333	4.85368	4.75251	2.02298	Sample_71	AI_export_Plate 1 UNS LN_F8_F08_CD8p_CD8_live.fcs	RBe17_Control_36_UNS	Control	RBe17	thirty_six	Control_thirty_six	UNS	F08
1479	Sample_71	3	64	0.0853333	4.26365	3.80926	1.97439	Sample_71	AI_export_Plate 1 UNS LN_F8_F08_CD8p_CD8_live.fcs	RBe17_Control_36_UNS	Control	RBe17	thirty_six	Control_thirty_six	UNS	F08
1480	Sample_71	4	165	0.22	NA	NA	NA	Sample_71	AI_export_Plate 1 UNS LN_F8_F08_CD8p_CD8_live.fcs	RBe17_Control_36_UNS	Control	RBe17	thirty_six	Control_thirty_six	UNS	F08
1481	Sample_71	5	50	0.0666667	18.4122	18.7228	1.28612	Sample_71	AI_export_Plate 1 UNS LN_F8_F08_CD8p_CD8_live.fcs	RBe17_Control_36_UNS	Control	RBe17	thirty_six	Control_thirty_six	UNS	F08
1482	Sample_71	6	108	0.144	18.3813	18.3813	NA	Sample_71	AI_export_Plate 1 UNS LN_F8_F08_CD8p_CD8_live.fcs	RBe17_Control_36_UNS	Control	RBe17	thirty_six	Control_thirty_six	UNS	F08
1483	Sample_71	7	20	0.0266667	19.348	19.5961	0.868912	Sample_71	AI_export_Plate 1 UNS LN_F8_F08_CD8p_CD8_live.fcs	RBe17_Control_36_UNS	Control	RBe17	thirty_six	Control_thirty_six	UNS	F08
1484	Sample_71	8	17	0.0226667	11.7784	11.7791	1.13077	Sample_71	AI_export_Plate 1 UNS LN_F8_F08_CD8p_CD8_live.fcs	RBe17_Control_36_UNS	Control	RBe17	thirty_six	Control_thirty_six	UNS	F08
1485	Sample_71	9	20	0.0266667	16.3504	15.8914	1.15467	Sample_71	AI_export_Plate 1 UNS LN_F8_F08_CD8p_CD8_live.fcs	RBe17_Control_36_UNS	Control	RBe17	thirty_six	Control_thirty_six	UNS	F08
1486	Sample_72	1	112	0.149333	22.4403	23.3026	2.65156	Sample_72	AI_export_Plate 1 UNS LN_F9_F09_CD8p_CD8_live.fcs	RMl17_Control_36_UNS	Control	RMl17	thirty_six	Control_thirty_six	UNS	F09
1487	Sample_72	10	26	0.0346667	16.0995	16.1653	2.00768	Sample_72	AI_export_Plate 1 UNS LN_F9_F09_CD8p_CD8_live.fcs	RMl17_Control_36_UNS	Control	RMl17	thirty_six	Control_thirty_six	UNS	F09
1488	Sample_72	11	56	0.0746667	18.885	19.5483	3.13859	Sample_72	AI_export_Plate 1 UNS LN_F9_F09_CD8p_CD8_live.fcs	RMl17_Control_36_UNS	Control	RMl17	thirty_six	Control_thirty_six	UNS	F09
1489	Sample_72	12	9	0.012	10.9361	9.01587	5.37468	Sample_72	AI_export_Plate 1 UNS LN_F9_F09_CD8p_CD8_live.fcs	RMl17_Control_36_UNS	Control	RMl17	thirty_six	Control_thirty_six	UNS	F09
1490	Sample_72	13	13	0.0173333	NA	NA	NA	Sample_72	AI_export_Plate 1 UNS LN_F9_F09_CD8p_CD8_live.fcs	RMl17_Control_36_UNS	Control	RMl17	thirty_six	Control_thirty_six	UNS	F09
1491	Sample_72	14	0	0	NA	NA	NA	Sample_72	AI_export_Plate 1 UNS LN_F9_F09_CD8p_CD8_live.fcs	RMl17_Control_36_UNS	Control	RMl17	thirty_six	Control_thirty_six	UNS	F09
1492	Sample_72	15	0	0	NA	NA	NA	Sample_72	AI_export_Plate 1 UNS LN_F9_F09_CD8p_CD8_live.fcs	RMl17_Control_36_UNS	Control	RMl17	thirty_six	Control_thirty_six	UNS	F09
1493	Sample_72	2	130	0.173333	4.47797	4.52519	2.1442	Sample_72	AI_export_Plate 1 UNS LN_F9_F09_CD8p_CD8_live.fcs	RMl17_Control_36_UNS	Control	RMl17	thirty_six	Control_thirty_six	UNS	F09
1494	Sample_72	3	95	0.126667	4.07786	3.66676	2.66083	Sample_72	AI_export_Plate 1 UNS LN_F9_F09_CD8p_CD8_live.fcs	RMl17_Control_36_UNS	Control	RMl17	thirty_six	Control_thirty_six	UNS	F09
1495	Sample_72	4	74	0.0986667	19.5961	19.5961	NA	Sample_72	AI_export_Plate 1 UNS LN_F9_F09_CD8p_CD8_live.fcs	RMl17_Control_36_UNS	Control	RMl17	thirty_six	Control_thirty_six	UNS	F09
1496	Sample_72	5	58	0.0773333	18.3714	18.8218	2.6768	Sample_72	AI_export_Plate 1 UNS LN_F9_F09_CD8p_CD8_live.fcs	RMl17_Control_36_UNS	Control	RMl17	thirty_six	Control_thirty_six	UNS	F09
1497	Sample_72	6	49	0.0653333	NA	NA	NA	Sample_72	AI_export_Plate 1 UNS LN_F9_F09_CD8p_CD8_live.fcs	RMl17_Control_36_UNS	Control	RMl17	thirty_six	Control_thirty_six	UNS	F09
1498	Sample_72	7	38	0.0506667	19.4747	19.5961	0.208128	Sample_72	AI_export_Plate 1 UNS LN_F9_F09_CD8p_CD8_live.fcs	RMl17_Control_36_UNS	Control	RMl17	thirty_six	Control_thirty_six	UNS	F09
1499	Sample_72	8	48	0.064	10.8362	11.0429	1.67301	Sample_72	AI_export_Plate 1 UNS LN_F9_F09_CD8p_CD8_live.fcs	RMl17_Control_36_UNS	Control	RMl17	thirty_six	Control_thirty_six	UNS	F09
1500	Sample_72	9	42	0.056	15.7608	15.8352	1.76811	Sample_72	AI_export_Plate 1 UNS LN_F9_F09_CD8p_CD8_live.fcs	RMl17_Control_36_UNS	Control	RMl17	thirty_six	Control_thirty_six	UNS	F09
1501	Sample_73	1	125	0.166667	21.7087	22.2666	2.37632	Sample_73	AI_export_Plate 1 UNS LN_G1_G01_CD8p_CD8_live.fcs	RBv17_aIL10+aPD1_-1_UNS	aIL10+aPD1	RBv17	minus_one	aIL10+aPD1_minus_one	UNS	G01
1502	Sample_73	10	12	0.016	14.9111	15.4074	2.24192	Sample_73	AI_export_Plate 1 UNS LN_G1_G01_CD8p_CD8_live.fcs	RBv17_aIL10+aPD1_-1_UNS	aIL10+aPD1	RBv17	minus_one	aIL10+aPD1_minus_one	UNS	G01
1503	Sample_73	11	39	0.052	19.2501	19.5483	0.818581	Sample_73	AI_export_Plate 1 UNS LN_G1_G01_CD8p_CD8_live.fcs	RBv17_aIL10+aPD1_-1_UNS	aIL10+aPD1	RBv17	minus_one	aIL10+aPD1_minus_one	UNS	G01
1504	Sample_73	12	9	0.012	8.43094	8.39883	0.519481	Sample_73	AI_export_Plate 1 UNS LN_G1_G01_CD8p_CD8_live.fcs	RBv17_aIL10+aPD1_-1_UNS	aIL10+aPD1	RBv17	minus_one	aIL10+aPD1_minus_one	UNS	G01
1505	Sample_73	13	3	0.004	NA	NA	NA	Sample_73	AI_export_Plate 1 UNS LN_G1_G01_CD8p_CD8_live.fcs	RBv17_aIL10+aPD1_-1_UNS	aIL10+aPD1	RBv17	minus_one	aIL10+aPD1_minus_one	UNS	G01
1506	Sample_73	14	1	0.00133333	0.56396	0.56396	NA	Sample_73	AI_export_Plate 1 UNS LN_G1_G01_CD8p_CD8_live.fcs	RBv17_aIL10+aPD1_-1_UNS	aIL10+aPD1	RBv17	minus_one	aIL10+aPD1_minus_one	UNS	G01
1507	Sample_73	15	0	0	NA	NA	NA	Sample_73	AI_export_Plate 1 UNS LN_G1_G01_CD8p_CD8_live.fcs	RBv17_aIL10+aPD1_-1_UNS	aIL10+aPD1	RBv17	minus_one	aIL10+aPD1_minus_one	UNS	G01
1508	Sample_73	2	153	0.204	4.11634	4.20339	2.33846	Sample_73	AI_export_Plate 1 UNS LN_G1_G01_CD8p_CD8_live.fcs	RBv17_aIL10+aPD1_-1_UNS	aIL10+aPD1	RBv17	minus_one	aIL10+aPD1_minus_one	UNS	G01
1509	Sample_73	3	178	0.237333	3.60357	3.42104	2.4209	Sample_73	AI_export_Plate 1 UNS LN_G1_G01_CD8p_CD8_live.fcs	RBv17_aIL10+aPD1_-1_UNS	aIL10+aPD1	RBv17	minus_one	aIL10+aPD1_minus_one	UNS	G01
1510	Sample_73	4	52	0.0693333	24.7633	24.7633	NA	Sample_73	AI_export_Plate 1 UNS LN_G1_G01_CD8p_CD8_live.fcs	RBv17_aIL10+aPD1_-1_UNS	aIL10+aPD1	RBv17	minus_one	aIL10+aPD1_minus_one	UNS	G01
1511	Sample_73	5	81	0.108	18.8837	19.2606	1.88543	Sample_73	AI_export_Plate 1 UNS LN_G1_G01_CD8p_CD8_live.fcs	RBv17_aIL10+aPD1_-1_UNS	aIL10+aPD1	RBv17	minus_one	aIL10+aPD1_minus_one	UNS	G01
1512	Sample_73	6	26	0.0346667	NA	NA	NA	Sample_73	AI_export_Plate 1 UNS LN_G1_G01_CD8p_CD8_live.fcs	RBv17_aIL10+aPD1_-1_UNS	aIL10+aPD1	RBv17	minus_one	aIL10+aPD1_minus_one	UNS	G01
1513	Sample_73	7	21	0.028	19.4318	19.5665	0.227665	Sample_73	AI_export_Plate 1 UNS LN_G1_G01_CD8p_CD8_live.fcs	RBv17_aIL10+aPD1_-1_UNS	aIL10+aPD1	RBv17	minus_one	aIL10+aPD1_minus_one	UNS	G01
1514	Sample_73	8	27	0.036	11.753	12.2764	1.26114	Sample_73	AI_export_Plate 1 UNS LN_G1_G01_CD8p_CD8_live.fcs	RBv17_aIL10+aPD1_-1_UNS	aIL10+aPD1	RBv17	minus_one	aIL10+aPD1_minus_one	UNS	G01
1515	Sample_73	9	23	0.0306667	15.8216	15.8914	0.900517	Sample_73	AI_export_Plate 1 UNS LN_G1_G01_CD8p_CD8_live.fcs	RBv17_aIL10+aPD1_-1_UNS	aIL10+aPD1	RBv17	minus_one	aIL10+aPD1_minus_one	UNS	G01
1516	Sample_74	1	144	0.192	21.9153	21.9604	2.06164	Sample_74	AI_export_Plate 1 UNS LN_G10_G10_CD8p_CD8_live.fcs	RVi17_Control_-1_UNS	Control	RVi17	minus_one	Control_minus_one	UNS	G10
1517	Sample_74	10	26	0.0346667	15.7965	17.1537	2.89835	Sample_74	AI_export_Plate 1 UNS LN_G10_G10_CD8p_CD8_live.fcs	RVi17_Control_-1_UNS	Control	RVi17	minus_one	Control_minus_one	UNS	G10
1518	Sample_74	11	45	0.06	19.426	19.5483	1.03006	Sample_74	AI_export_Plate 1 UNS LN_G10_G10_CD8p_CD8_live.fcs	RVi17_Control_-1_UNS	Control	RVi17	minus_one	Control_minus_one	UNS	G10
1519	Sample_74	12	11	0.0146667	8.31067	8.22761	0.55838	Sample_74	AI_export_Plate 1 UNS LN_G10_G10_CD8p_CD8_live.fcs	RVi17_Control_-1_UNS	Control	RVi17	minus_one	Control_minus_one	UNS	G10
1520	Sample_74	13	7	0.00933333	NA	NA	NA	Sample_74	AI_export_Plate 1 UNS LN_G10_G10_CD8p_CD8_live.fcs	RVi17_Control_-1_UNS	Control	RVi17	minus_one	Control_minus_one	UNS	G10
1521	Sample_74	14	2	0.00266667	9.99306	9.99306	13.3348	Sample_74	AI_export_Plate 1 UNS LN_G10_G10_CD8p_CD8_live.fcs	RVi17_Control_-1_UNS	Control	RVi17	minus_one	Control_minus_one	UNS	G10
1522	Sample_74	15	0	0	NA	NA	NA	Sample_74	AI_export_Plate 1 UNS LN_G10_G10_CD8p_CD8_live.fcs	RVi17_Control_-1_UNS	Control	RVi17	minus_one	Control_minus_one	UNS	G10
1523	Sample_74	2	137	0.182667	4.71738	4.38467	2.34651	Sample_74	AI_export_Plate 1 UNS LN_G10_G10_CD8p_CD8_live.fcs	RVi17_Control_-1_UNS	Control	RVi17	minus_one	Control_minus_one	UNS	G10
1524	Sample_74	3	123	0.164	3.53493	3.50288	1.23603	Sample_74	AI_export_Plate 1 UNS LN_G10_G10_CD8p_CD8_live.fcs	RVi17_Control_-1_UNS	Control	RVi17	minus_one	Control_minus_one	UNS	G10
1525	Sample_74	4	56	0.0746667	19.1343	19.1343	5.03467	Sample_74	AI_export_Plate 1 UNS LN_G10_G10_CD8p_CD8_live.fcs	RVi17_Control_-1_UNS	Control	RVi17	minus_one	Control_minus_one	UNS	G10
1526	Sample_74	5	63	0.084	19.1946	19.299	0.937608	Sample_74	AI_export_Plate 1 UNS LN_G10_G10_CD8p_CD8_live.fcs	RVi17_Control_-1_UNS	Control	RVi17	minus_one	Control_minus_one	UNS	G10
1527	Sample_74	6	30	0.04	NA	NA	NA	Sample_74	AI_export_Plate 1 UNS LN_G10_G10_CD8p_CD8_live.fcs	RVi17_Control_-1_UNS	Control	RVi17	minus_one	Control_minus_one	UNS	G10
1528	Sample_74	7	25	0.0333333	19.4937	19.5961	0.225532	Sample_74	AI_export_Plate 1 UNS LN_G10_G10_CD8p_CD8_live.fcs	RVi17_Control_-1_UNS	Control	RVi17	minus_one	Control_minus_one	UNS	G10
1529	Sample_74	8	48	0.064	11.7376	11.7295	2.59492	Sample_74	AI_export_Plate 1 UNS LN_G10_G10_CD8p_CD8_live.fcs	RVi17_Control_-1_UNS	Control	RVi17	minus_one	Control_minus_one	UNS	G10
1530	Sample_74	9	33	0.044	16.3128	15.8914	1.29881	Sample_74	AI_export_Plate 1 UNS LN_G10_G10_CD8p_CD8_live.fcs	RVi17_Control_-1_UNS	Control	RVi17	minus_one	Control_minus_one	UNS	G10
1531	Sample_75	1	181	0.241333	21.9727	22.2905	2.37953	Sample_75	AI_export_Plate 1 UNS LN_G11_G11_CD8p_CD8_live.fcs	RWs17_aIL10+aPD1_-1_UNS	aIL10+aPD1	RWs17	minus_one	aIL10+aPD1_minus_one	UNS	G11
1532	Sample_75	10	12	0.016	13.1179	11.0985	3.93219	Sample_75	AI_export_Plate 1 UNS LN_G11_G11_CD8p_CD8_live.fcs	RWs17_aIL10+aPD1_-1_UNS	aIL10+aPD1	RWs17	minus_one	aIL10+aPD1_minus_one	UNS	G11
1533	Sample_75	11	28	0.0373333	18.349	19.5483	4.12594	Sample_75	AI_export_Plate 1 UNS LN_G11_G11_CD8p_CD8_live.fcs	RWs17_aIL10+aPD1_-1_UNS	aIL10+aPD1	RWs17	minus_one	aIL10+aPD1_minus_one	UNS	G11
1534	Sample_75	12	7	0.00933333	9.19516	8.05461	2.87883	Sample_75	AI_export_Plate 1 UNS LN_G11_G11_CD8p_CD8_live.fcs	RWs17_aIL10+aPD1_-1_UNS	aIL10+aPD1	RWs17	minus_one	aIL10+aPD1_minus_one	UNS	G11
1535	Sample_75	13	2	0.00266667	NA	NA	NA	Sample_75	AI_export_Plate 1 UNS LN_G11_G11_CD8p_CD8_live.fcs	RWs17_aIL10+aPD1_-1_UNS	aIL10+aPD1	RWs17	minus_one	aIL10+aPD1_minus_one	UNS	G11
1536	Sample_75	14	1	0.00133333	0.56396	0.56396	NA	Sample_75	AI_export_Plate 1 UNS LN_G11_G11_CD8p_CD8_live.fcs	RWs17_aIL10+aPD1_-1_UNS	aIL10+aPD1	RWs17	minus_one	aIL10+aPD1_minus_one	UNS	G11
1537	Sample_75	15	2	0.00266667	24.7633	24.7633	2.58651e-09	Sample_75	AI_export_Plate 1 UNS LN_G11_G11_CD8p_CD8_live.fcs	RWs17_aIL10+aPD1_-1_UNS	aIL10+aPD1	RWs17	minus_one	aIL10+aPD1_minus_one	UNS	G11
1538	Sample_75	2	160	0.213333	4.29844	3.81511	3.53632	Sample_75	AI_export_Plate 1 UNS LN_G11_G11_CD8p_CD8_live.fcs	RWs17_aIL10+aPD1_-1_UNS	aIL10+aPD1	RWs17	minus_one	aIL10+aPD1_minus_one	UNS	G11
1539	Sample_75	3	135	0.18	3.413	3.57011	1.40318	Sample_75	AI_export_Plate 1 UNS LN_G11_G11_CD8p_CD8_live.fcs	RWs17_aIL10+aPD1_-1_UNS	aIL10+aPD1	RWs17	minus_one	aIL10+aPD1_minus_one	UNS	G11
1540	Sample_75	4	53	0.0706667	13.6098	13.6098	NA	Sample_75	AI_export_Plate 1 UNS LN_G11_G11_CD8p_CD8_live.fcs	RWs17_aIL10+aPD1_-1_UNS	aIL10+aPD1	RWs17	minus_one	aIL10+aPD1_minus_one	UNS	G11
1541	Sample_75	5	85	0.113333	18.9844	19.0505	0.899732	Sample_75	AI_export_Plate 1 UNS LN_G11_G11_CD8p_CD8_live.fcs	RWs17_aIL10+aPD1_-1_UNS	aIL10+aPD1	RWs17	minus_one	aIL10+aPD1_minus_one	UNS	G11
1542	Sample_75	6	6	0.008	NA	NA	NA	Sample_75	AI_export_Plate 1 UNS LN_G11_G11_CD8p_CD8_live.fcs	RWs17_aIL10+aPD1_-1_UNS	aIL10+aPD1	RWs17	minus_one	aIL10+aPD1_minus_one	UNS	G11
1543	Sample_75	7	14	0.0186667	19.8566	19.5725	1.42842	Sample_75	AI_export_Plate 1 UNS LN_G11_G11_CD8p_CD8_live.fcs	RWs17_aIL10+aPD1_-1_UNS	aIL10+aPD1	RWs17	minus_one	aIL10+aPD1_minus_one	UNS	G11
1544	Sample_75	8	42	0.056	11.6416	11.83	1.62606	Sample_75	AI_export_Plate 1 UNS LN_G11_G11_CD8p_CD8_live.fcs	RWs17_aIL10+aPD1_-1_UNS	aIL10+aPD1	RWs17	minus_one	aIL10+aPD1_minus_one	UNS	G11
1545	Sample_75	9	22	0.0293333	15.9243	15.8914	2.51239	Sample_75	AI_export_Plate 1 UNS LN_G11_G11_CD8p_CD8_live.fcs	RWs17_aIL10+aPD1_-1_UNS	aIL10+aPD1	RWs17	minus_one	aIL10+aPD1_minus_one	UNS	G11
1546	Sample_76	1	158	0.210667	22.2357	22.5576	2.04184	Sample_76	AI_export_Plate 1 UNS LN_G12_G12_CD8p_CD8_live.fcs	RZp17_aIL10_-1_UNS	aIL10	RZp17	minus_one	aIL10_minus_one	UNS	G12
1547	Sample_76	10	12	0.016	13.6228	14.3071	3.10948	Sample_76	AI_export_Plate 1 UNS LN_G12_G12_CD8p_CD8_live.fcs	RZp17_aIL10_-1_UNS	aIL10	RZp17	minus_one	aIL10_minus_one	UNS	G12
1548	Sample_76	11	49	0.0653333	16.8144	19.5483	5.77753	Sample_76	AI_export_Plate 1 UNS LN_G12_G12_CD8p_CD8_live.fcs	RZp17_aIL10_-1_UNS	aIL10	RZp17	minus_one	aIL10_minus_one	UNS	G12
1549	Sample_76	12	9	0.012	8.42725	8.69682	0.597439	Sample_76	AI_export_Plate 1 UNS LN_G12_G12_CD8p_CD8_live.fcs	RZp17_aIL10_-1_UNS	aIL10	RZp17	minus_one	aIL10_minus_one	UNS	G12
1550	Sample_76	13	2	0.00266667	NA	NA	NA	Sample_76	AI_export_Plate 1 UNS LN_G12_G12_CD8p_CD8_live.fcs	RZp17_aIL10_-1_UNS	aIL10	RZp17	minus_one	aIL10_minus_one	UNS	G12
1551	Sample_76	14	0	0	NA	NA	NA	Sample_76	AI_export_Plate 1 UNS LN_G12_G12_CD8p_CD8_live.fcs	RZp17_aIL10_-1_UNS	aIL10	RZp17	minus_one	aIL10_minus_one	UNS	G12
1552	Sample_76	15	2	0.00266667	16.9043	16.9043	11.1143	Sample_76	AI_export_Plate 1 UNS LN_G12_G12_CD8p_CD8_live.fcs	RZp17_aIL10_-1_UNS	aIL10	RZp17	minus_one	aIL10_minus_one	UNS	G12
1553	Sample_76	2	120	0.16	4.81058	4.76028	2.13792	Sample_76	AI_export_Plate 1 UNS LN_G12_G12_CD8p_CD8_live.fcs	RZp17_aIL10_-1_UNS	aIL10	RZp17	minus_one	aIL10_minus_one	UNS	G12
1554	Sample_76	3	208	0.277333	3.81908	3.66676	1.60746	Sample_76	AI_export_Plate 1 UNS LN_G12_G12_CD8p_CD8_live.fcs	RZp17_aIL10_-1_UNS	aIL10	RZp17	minus_one	aIL10_minus_one	UNS	G12
1555	Sample_76	4	38	0.0506667	NA	NA	NA	Sample_76	AI_export_Plate 1 UNS LN_G12_G12_CD8p_CD8_live.fcs	RZp17_aIL10_-1_UNS	aIL10	RZp17	minus_one	aIL10_minus_one	UNS	G12
1556	Sample_76	5	54	0.072	19.0144	18.9677	0.962391	Sample_76	AI_export_Plate 1 UNS LN_G12_G12_CD8p_CD8_live.fcs	RZp17_aIL10_-1_UNS	aIL10	RZp17	minus_one	aIL10_minus_one	UNS	G12
1557	Sample_76	6	10	0.0133333	NA	NA	NA	Sample_76	AI_export_Plate 1 UNS LN_G12_G12_CD8p_CD8_live.fcs	RZp17_aIL10_-1_UNS	aIL10	RZp17	minus_one	aIL10_minus_one	UNS	G12
1558	Sample_76	7	11	0.0146667	19.5573	19.5961	0.164848	Sample_76	AI_export_Plate 1 UNS LN_G12_G12_CD8p_CD8_live.fcs	RZp17_aIL10_-1_UNS	aIL10	RZp17	minus_one	aIL10_minus_one	UNS	G12
1559	Sample_76	8	52	0.0693333	11.5133	11.7791	1.96511	Sample_76	AI_export_Plate 1 UNS LN_G12_G12_CD8p_CD8_live.fcs	RZp17_aIL10_-1_UNS	aIL10	RZp17	minus_one	aIL10_minus_one	UNS	G12
1560	Sample_76	9	25	0.0333333	15.967	15.8914	0.425091	Sample_76	AI_export_Plate 1 UNS LN_G12_G12_CD8p_CD8_live.fcs	RZp17_aIL10_-1_UNS	aIL10	RZp17	minus_one	aIL10_minus_one	UNS	G12
1561	Sample_77	1	132	0.176	21.702	22.1564	2.64513	Sample_77	AI_export_Plate 1 UNS LN_G2_G02_CD8p_CD8_live.fcs	REu17_Control_-1_UNS	Control	REu17	minus_one	Control_minus_one	UNS	G02
1562	Sample_77	10	7	0.00933333	12.8666	14.1799	3.09409	Sample_77	AI_export_Plate 1 UNS LN_G2_G02_CD8p_CD8_live.fcs	REu17_Control_-1_UNS	Control	REu17	minus_one	Control_minus_one	UNS	G02
1563	Sample_77	11	13	0.0173333	18.9683	19.5483	5.07839	Sample_77	AI_export_Plate 1 UNS LN_G2_G02_CD8p_CD8_live.fcs	REu17_Control_-1_UNS	Control	REu17	minus_one	Control_minus_one	UNS	G02
1564	Sample_77	12	8	0.0106667	8.31013	8.20868	0.361106	Sample_77	AI_export_Plate 1 UNS LN_G2_G02_CD8p_CD8_live.fcs	REu17_Control_-1_UNS	Control	REu17	minus_one	Control_minus_one	UNS	G02
1565	Sample_77	13	4	0.00533333	NA	NA	NA	Sample_77	AI_export_Plate 1 UNS LN_G2_G02_CD8p_CD8_live.fcs	REu17_Control_-1_UNS	Control	REu17	minus_one	Control_minus_one	UNS	G02
1566	Sample_77	14	0	0	NA	NA	NA	Sample_77	AI_export_Plate 1 UNS LN_G2_G02_CD8p_CD8_live.fcs	REu17_Control_-1_UNS	Control	REu17	minus_one	Control_minus_one	UNS	G02
1567	Sample_77	15	0	0	NA	NA	NA	Sample_77	AI_export_Plate 1 UNS LN_G2_G02_CD8p_CD8_live.fcs	REu17_Control_-1_UNS	Control	REu17	minus_one	Control_minus_one	UNS	G02
1568	Sample_77	2	225	0.3	3.92832	3.71462	2.28255	Sample_77	AI_export_Plate 1 UNS LN_G2_G02_CD8p_CD8_live.fcs	REu17_Control_-1_UNS	Control	REu17	minus_one	Control_minus_one	UNS	G02
1569	Sample_77	3	223	0.297333	3.5177	3.26132	2.07525	Sample_77	AI_export_Plate 1 UNS LN_G2_G02_CD8p_CD8_live.fcs	REu17_Control_-1_UNS	Control	REu17	minus_one	Control_minus_one	UNS	G02
1570	Sample_77	4	26	0.0346667	19.5961	19.5961	NA	Sample_77	AI_export_Plate 1 UNS LN_G2_G02_CD8p_CD8_live.fcs	REu17_Control_-1_UNS	Control	REu17	minus_one	Control_minus_one	UNS	G02
1571	Sample_77	5	72	0.096	19.0158	18.9397	1.20187	Sample_77	AI_export_Plate 1 UNS LN_G2_G02_CD8p_CD8_live.fcs	REu17_Control_-1_UNS	Control	REu17	minus_one	Control_minus_one	UNS	G02
1572	Sample_77	6	1	0.00133333	NA	NA	NA	Sample_77	AI_export_Plate 1 UNS LN_G2_G02_CD8p_CD8_live.fcs	REu17_Control_-1_UNS	Control	REu17	minus_one	Control_minus_one	UNS	G02
1573	Sample_77	7	5	0.00666667	19.3965	19.5961	0.44627	Sample_77	AI_export_Plate 1 UNS LN_G2_G02_CD8p_CD8_live.fcs	REu17_Control_-1_UNS	Control	REu17	minus_one	Control_minus_one	UNS	G02
1574	Sample_77	8	24	0.032	11.8636	11.9767	1.04722	Sample_77	AI_export_Plate 1 UNS LN_G2_G02_CD8p_CD8_live.fcs	REu17_Control_-1_UNS	Control	REu17	minus_one	Control_minus_one	UNS	G02
1575	Sample_77	9	10	0.0133333	15.9185	15.8914	0.627693	Sample_77	AI_export_Plate 1 UNS LN_G2_G02_CD8p_CD8_live.fcs	REu17_Control_-1_UNS	Control	REu17	minus_one	Control_minus_one	UNS	G02
1576	Sample_78	1	59	0.0786667	20.6249	21.2996	4.15829	Sample_78	AI_export_Plate 1 UNS LN_G3_G03_CD8p_CD8_live.fcs	RKq17_aIL10+aPD1_-1_UNS	aIL10+aPD1	RKq17	minus_one	aIL10+aPD1_minus_one	UNS	G03
1577	Sample_78	10	20	0.0266667	13.9465	15.2162	4.08255	Sample_78	AI_export_Plate 1 UNS LN_G3_G03_CD8p_CD8_live.fcs	RKq17_aIL10+aPD1_-1_UNS	aIL10+aPD1	RKq17	minus_one	aIL10+aPD1_minus_one	UNS	G03
1578	Sample_78	11	13	0.0173333	19.2841	19.5483	0.791438	Sample_78	AI_export_Plate 1 UNS LN_G3_G03_CD8p_CD8_live.fcs	RKq17_aIL10+aPD1_-1_UNS	aIL10+aPD1	RKq17	minus_one	aIL10+aPD1_minus_one	UNS	G03
1579	Sample_78	12	20	0.0266667	8.28973	8.40229	0.826877	Sample_78	AI_export_Plate 1 UNS LN_G3_G03_CD8p_CD8_live.fcs	RKq17_aIL10+aPD1_-1_UNS	aIL10+aPD1	RKq17	minus_one	aIL10+aPD1_minus_one	UNS	G03
1580	Sample_78	13	4	0.00533333	NA	NA	NA	Sample_78	AI_export_Plate 1 UNS LN_G3_G03_CD8p_CD8_live.fcs	RKq17_aIL10+aPD1_-1_UNS	aIL10+aPD1	RKq17	minus_one	aIL10+aPD1_minus_one	UNS	G03
1581	Sample_78	14	0	0	NA	NA	NA	Sample_78	AI_export_Plate 1 UNS LN_G3_G03_CD8p_CD8_live.fcs	RKq17_aIL10+aPD1_-1_UNS	aIL10+aPD1	RKq17	minus_one	aIL10+aPD1_minus_one	UNS	G03
1582	Sample_78	15	2	0.00266667	NA	NA	NA	Sample_78	AI_export_Plate 1 UNS LN_G3_G03_CD8p_CD8_live.fcs	RKq17_aIL10+aPD1_-1_UNS	aIL10+aPD1	RKq17	minus_one	aIL10+aPD1_minus_one	UNS	G03
1583	Sample_78	2	298	0.397333	4.22453	4.12711	2.64942	Sample_78	AI_export_Plate 1 UNS LN_G3_G03_CD8p_CD8_live.fcs	RKq17_aIL10+aPD1_-1_UNS	aIL10+aPD1	RKq17	minus_one	aIL10+aPD1_minus_one	UNS	G03
1584	Sample_78	3	126	0.168	3.6746	3.4967	2.34694	Sample_78	AI_export_Plate 1 UNS LN_G3_G03_CD8p_CD8_live.fcs	RKq17_aIL10+aPD1_-1_UNS	aIL10+aPD1	RKq17	minus_one	aIL10+aPD1_minus_one	UNS	G03
1585	Sample_78	4	58	0.0773333	NA	NA	NA	Sample_78	AI_export_Plate 1 UNS LN_G3_G03_CD8p_CD8_live.fcs	RKq17_aIL10+aPD1_-1_UNS	aIL10+aPD1	RKq17	minus_one	aIL10+aPD1_minus_one	UNS	G03
1586	Sample_78	5	51	0.068	17.7754	18.5106	2.94069	Sample_78	AI_export_Plate 1 UNS LN_G3_G03_CD8p_CD8_live.fcs	RKq17_aIL10+aPD1_-1_UNS	aIL10+aPD1	RKq17	minus_one	aIL10+aPD1_minus_one	UNS	G03
1587	Sample_78	6	19	0.0253333	NA	NA	NA	Sample_78	AI_export_Plate 1 UNS LN_G3_G03_CD8p_CD8_live.fcs	RKq17_aIL10+aPD1_-1_UNS	aIL10+aPD1	RKq17	minus_one	aIL10+aPD1_minus_one	UNS	G03
1588	Sample_78	7	15	0.02	19.5364	19.5961	0.188156	Sample_78	AI_export_Plate 1 UNS LN_G3_G03_CD8p_CD8_live.fcs	RKq17_aIL10+aPD1_-1_UNS	aIL10+aPD1	RKq17	minus_one	aIL10+aPD1_minus_one	UNS	G03
1589	Sample_78	8	45	0.06	10.9904	11.3179	1.77716	Sample_78	AI_export_Plate 1 UNS LN_G3_G03_CD8p_CD8_live.fcs	RKq17_aIL10+aPD1_-1_UNS	aIL10+aPD1	RKq17	minus_one	aIL10+aPD1_minus_one	UNS	G03
1590	Sample_78	9	20	0.0266667	15.7018	15.8914	1.31952	Sample_78	AI_export_Plate 1 UNS LN_G3_G03_CD8p_CD8_live.fcs	RKq17_aIL10+aPD1_-1_UNS	aIL10+aPD1	RKq17	minus_one	aIL10+aPD1_minus_one	UNS	G03
1591	Sample_79	1	107	0.142667	21.4719	21.7821	3.3877	Sample_79	AI_export_Plate 1 UNS LN_G4_G04_CD8p_CD8_live.fcs	RVc17_aIL10_-1_UNS	aIL10	RVc17	minus_one	aIL10_minus_one	UNS	G04
1592	Sample_79	10	53	0.0706667	14.877	15.5145	2.81369	Sample_79	AI_export_Plate 1 UNS LN_G4_G04_CD8p_CD8_live.fcs	RVc17_aIL10_-1_UNS	aIL10	RVc17	minus_one	aIL10_minus_one	UNS	G04
1593	Sample_79	11	19	0.0253333	19.5171	19.5483	0.179907	Sample_79	AI_export_Plate 1 UNS LN_G4_G04_CD8p_CD8_live.fcs	RVc17_aIL10_-1_UNS	aIL10	RVc17	minus_one	aIL10_minus_one	UNS	G04
1594	Sample_79	12	9	0.012	8.67007	8.40946	2.14549	Sample_79	AI_export_Plate 1 UNS LN_G4_G04_CD8p_CD8_live.fcs	RVc17_aIL10_-1_UNS	aIL10	RVc17	minus_one	aIL10_minus_one	UNS	G04
1595	Sample_79	13	18	0.024	NA	NA	NA	Sample_79	AI_export_Plate 1 UNS LN_G4_G04_CD8p_CD8_live.fcs	RVc17_aIL10_-1_UNS	aIL10	RVc17	minus_one	aIL10_minus_one	UNS	G04
1596	Sample_79	14	1	0.00133333	19.5483	19.5483	NA	Sample_79	AI_export_Plate 1 UNS LN_G4_G04_CD8p_CD8_live.fcs	RVc17_aIL10_-1_UNS	aIL10	RVc17	minus_one	aIL10_minus_one	UNS	G04
1597	Sample_79	15	0	0	NA	NA	NA	Sample_79	AI_export_Plate 1 UNS LN_G4_G04_CD8p_CD8_live.fcs	RVc17_aIL10_-1_UNS	aIL10	RVc17	minus_one	aIL10_minus_one	UNS	G04
1598	Sample_79	2	204	0.272	4.34551	4.52145	2.40478	Sample_79	AI_export_Plate 1 UNS LN_G4_G04_CD8p_CD8_live.fcs	RVc17_aIL10_-1_UNS	aIL10	RVc17	minus_one	aIL10_minus_one	UNS	G04
1599	Sample_79	3	88	0.117333	3.83446	3.46058	2.90253	Sample_79	AI_export_Plate 1 UNS LN_G4_G04_CD8p_CD8_live.fcs	RVc17_aIL10_-1_UNS	aIL10	RVc17	minus_one	aIL10_minus_one	UNS	G04
1600	Sample_79	4	66	0.088	NA	NA	NA	Sample_79	AI_export_Plate 1 UNS LN_G4_G04_CD8p_CD8_live.fcs	RVc17_aIL10_-1_UNS	aIL10	RVc17	minus_one	aIL10_minus_one	UNS	G04
1601	Sample_79	5	65	0.0866667	18.6597	18.9448	1.9174	Sample_79	AI_export_Plate 1 UNS LN_G4_G04_CD8p_CD8_live.fcs	RVc17_aIL10_-1_UNS	aIL10	RVc17	minus_one	aIL10_minus_one	UNS	G04
1602	Sample_79	6	40	0.0533333	NA	NA	NA	Sample_79	AI_export_Plate 1 UNS LN_G4_G04_CD8p_CD8_live.fcs	RVc17_aIL10_-1_UNS	aIL10	RVc17	minus_one	aIL10_minus_one	UNS	G04
1603	Sample_79	7	15	0.02	19.3837	19.5338	0.299941	Sample_79	AI_export_Plate 1 UNS LN_G4_G04_CD8p_CD8_live.fcs	RVc17_aIL10_-1_UNS	aIL10	RVc17	minus_one	aIL10_minus_one	UNS	G04
1604	Sample_79	8	37	0.0493333	12.4108	12.2484	2.35298	Sample_79	AI_export_Plate 1 UNS LN_G4_G04_CD8p_CD8_live.fcs	RVc17_aIL10_-1_UNS	aIL10	RVc17	minus_one	aIL10_minus_one	UNS	G04
1605	Sample_79	9	28	0.0373333	15.9536	15.8914	1.31049	Sample_79	AI_export_Plate 1 UNS LN_G4_G04_CD8p_CD8_live.fcs	RVc17_aIL10_-1_UNS	aIL10	RVc17	minus_one	aIL10_minus_one	UNS	G04
1606	Sample_8	1	122	0.162667	21.7315	21.9976	2.62201	Sample_8	AI_export_Plate 1 UNS LN_A5_A05_CD8p_CD8_live.fcs	RHm17_aIL10_-1_UNS	aIL10	RHm17	minus_one	aIL10_minus_one	UNS	A05
1607	Sample_8	10	12	0.016	16.2484	16.3051	2.55884	Sample_8	AI_export_Plate 1 UNS LN_A5_A05_CD8p_CD8_live.fcs	RHm17_aIL10_-1_UNS	aIL10	RHm17	minus_one	aIL10_minus_one	UNS	A05
1608	Sample_8	11	24	0.032	18.2318	19.5483	4.06826	Sample_8	AI_export_Plate 1 UNS LN_A5_A05_CD8p_CD8_live.fcs	RHm17_aIL10_-1_UNS	aIL10	RHm17	minus_one	aIL10_minus_one	UNS	A05
1609	Sample_8	12	9	0.012	9.16339	9.09267	0.744568	Sample_8	AI_export_Plate 1 UNS LN_A5_A05_CD8p_CD8_live.fcs	RHm17_aIL10_-1_UNS	aIL10	RHm17	minus_one	aIL10_minus_one	UNS	A05
1610	Sample_8	13	3	0.004	NA	NA	NA	Sample_8	AI_export_Plate 1 UNS LN_A5_A05_CD8p_CD8_live.fcs	RHm17_aIL10_-1_UNS	aIL10	RHm17	minus_one	aIL10_minus_one	UNS	A05
1611	Sample_8	14	3	0.004	9.95915	9.95915	13.2868	Sample_8	AI_export_Plate 1 UNS LN_A5_A05_CD8p_CD8_live.fcs	RHm17_aIL10_-1_UNS	aIL10	RHm17	minus_one	aIL10_minus_one	UNS	A05
1612	Sample_8	15	2	0.00266667	9.34254	9.34254	NA	Sample_8	AI_export_Plate 1 UNS LN_A5_A05_CD8p_CD8_live.fcs	RHm17_aIL10_-1_UNS	aIL10	RHm17	minus_one	aIL10_minus_one	UNS	A05
1613	Sample_8	2	260	0.346667	4.6435	4.72672	2.44347	Sample_8	AI_export_Plate 1 UNS LN_A5_A05_CD8p_CD8_live.fcs	RHm17_aIL10_-1_UNS	aIL10	RHm17	minus_one	aIL10_minus_one	UNS	A05
1614	Sample_8	3	78	0.104	4.23655	3.66676	2.50904	Sample_8	AI_export_Plate 1 UNS LN_A5_A05_CD8p_CD8_live.fcs	RHm17_aIL10_-1_UNS	aIL10	RHm17	minus_one	aIL10_minus_one	UNS	A05
1615	Sample_8	4	54	0.072	9.84097	12.822	6.37483	Sample_8	AI_export_Plate 1 UNS LN_A5_A05_CD8p_CD8_live.fcs	RHm17_aIL10_-1_UNS	aIL10	RHm17	minus_one	aIL10_minus_one	UNS	A05
1616	Sample_8	5	109	0.145333	18.6358	18.811	0.955433	Sample_8	AI_export_Plate 1 UNS LN_A5_A05_CD8p_CD8_live.fcs	RHm17_aIL10_-1_UNS	aIL10	RHm17	minus_one	aIL10_minus_one	UNS	A05
1617	Sample_8	6	12	0.016	NA	NA	NA	Sample_8	AI_export_Plate 1 UNS LN_A5_A05_CD8p_CD8_live.fcs	RHm17_aIL10_-1_UNS	aIL10	RHm17	minus_one	aIL10_minus_one	UNS	A05
1618	Sample_8	7	9	0.012	19.5027	19.5961	0.227428	Sample_8	AI_export_Plate 1 UNS LN_A5_A05_CD8p_CD8_live.fcs	RHm17_aIL10_-1_UNS	aIL10	RHm17	minus_one	aIL10_minus_one	UNS	A05
1619	Sample_8	8	37	0.0493333	12.493	12.3921	1.48245	Sample_8	AI_export_Plate 1 UNS LN_A5_A05_CD8p_CD8_live.fcs	RHm17_aIL10_-1_UNS	aIL10	RHm17	minus_one	aIL10_minus_one	UNS	A05
1620	Sample_8	9	16	0.0213333	15.9196	15.8914	1.44143	Sample_8	AI_export_Plate 1 UNS LN_A5_A05_CD8p_CD8_live.fcs	RHm17_aIL10_-1_UNS	aIL10	RHm17	minus_one	aIL10_minus_one	UNS	A05
1621	Sample_80	1	233	0.310667	22.4478	23.2983	2.37932	Sample_80	AI_export_Plate 1 UNS LN_G5_G05_CD8p_CD8_live.fcs	RZg17_Control_-1_UNS	Control	RZg17	minus_one	Control_minus_one	UNS	G05
1622	Sample_80	10	14	0.0186667	15.8631	15.8144	1.9463	Sample_80	AI_export_Plate 1 UNS LN_G5_G05_CD8p_CD8_live.fcs	RZg17_Control_-1_UNS	Control	RZg17	minus_one	Control_minus_one	UNS	G05
1623	Sample_80	11	61	0.0813333	19.0522	19.5483	2.4767	Sample_80	AI_export_Plate 1 UNS LN_G5_G05_CD8p_CD8_live.fcs	RZg17_Control_-1_UNS	Control	RZg17	minus_one	Control_minus_one	UNS	G05
1624	Sample_80	12	3	0.004	10.3569	9.04525	2.47579	Sample_80	AI_export_Plate 1 UNS LN_G5_G05_CD8p_CD8_live.fcs	RZg17_Control_-1_UNS	Control	RZg17	minus_one	Control_minus_one	UNS	G05
1625	Sample_80	13	4	0.00533333	NA	NA	NA	Sample_80	AI_export_Plate 1 UNS LN_G5_G05_CD8p_CD8_live.fcs	RZg17_Control_-1_UNS	Control	RZg17	minus_one	Control_minus_one	UNS	G05
1626	Sample_80	14	0	0	NA	NA	NA	Sample_80	AI_export_Plate 1 UNS LN_G5_G05_CD8p_CD8_live.fcs	RZg17_Control_-1_UNS	Control	RZg17	minus_one	Control_minus_one	UNS	G05
1627	Sample_80	15	0	0	NA	NA	NA	Sample_80	AI_export_Plate 1 UNS LN_G5_G05_CD8p_CD8_live.fcs	RZg17_Control_-1_UNS	Control	RZg17	minus_one	Control_minus_one	UNS	G05
1628	Sample_80	2	99	0.132	4.18532	4.18454	1.94991	Sample_80	AI_export_Plate 1 UNS LN_G5_G05_CD8p_CD8_live.fcs	RZg17_Control_-1_UNS	Control	RZg17	minus_one	Control_minus_one	UNS	G05
1629	Sample_80	3	66	0.088	4.09457	3.53655	3.19071	Sample_80	AI_export_Plate 1 UNS LN_G5_G05_CD8p_CD8_live.fcs	RZg17_Control_-1_UNS	Control	RZg17	minus_one	Control_minus_one	UNS	G05
1630	Sample_80	4	42	0.056	NA	NA	NA	Sample_80	AI_export_Plate 1 UNS LN_G5_G05_CD8p_CD8_live.fcs	RZg17_Control_-1_UNS	Control	RZg17	minus_one	Control_minus_one	UNS	G05
1631	Sample_80	5	118	0.157333	18.9926	19.2383	1.33833	Sample_80	AI_export_Plate 1 UNS LN_G5_G05_CD8p_CD8_live.fcs	RZg17_Control_-1_UNS	Control	RZg17	minus_one	Control_minus_one	UNS	G05
1632	Sample_80	6	11	0.0146667	NA	NA	NA	Sample_80	AI_export_Plate 1 UNS LN_G5_G05_CD8p_CD8_live.fcs	RZg17_Control_-1_UNS	Control	RZg17	minus_one	Control_minus_one	UNS	G05
1633	Sample_80	7	23	0.0306667	19.5409	19.5961	0.154506	Sample_80	AI_export_Plate 1 UNS LN_G5_G05_CD8p_CD8_live.fcs	RZg17_Control_-1_UNS	Control	RZg17	minus_one	Control_minus_one	UNS	G05
1634	Sample_80	8	40	0.0533333	12.1264	12.3946	0.936164	Sample_80	AI_export_Plate 1 UNS LN_G5_G05_CD8p_CD8_live.fcs	RZg17_Control_-1_UNS	Control	RZg17	minus_one	Control_minus_one	UNS	G05
1635	Sample_80	9	36	0.048	16.4212	15.9127	1.187	Sample_80	AI_export_Plate 1 UNS LN_G5_G05_CD8p_CD8_live.fcs	RZg17_Control_-1_UNS	Control	RZg17	minus_one	Control_minus_one	UNS	G05
1636	Sample_81	1	86	0.114667	21.8384	22.5386	2.90162	Sample_81	AI_export_Plate 1 UNS LN_G6_G06_CD8p_CD8_live.fcs	34920_aIL10_-1_UNS	aIL10	34920	minus_one	aIL10_minus_one	UNS	G06
1637	Sample_81	10	30	0.04	15.7683	16.3051	2.56614	Sample_81	AI_export_Plate 1 UNS LN_G6_G06_CD8p_CD8_live.fcs	34920_aIL10_-1_UNS	aIL10	34920	minus_one	aIL10_minus_one	UNS	G06
1638	Sample_81	11	19	0.0253333	18.4287	19.5483	3.07819	Sample_81	AI_export_Plate 1 UNS LN_G6_G06_CD8p_CD8_live.fcs	34920_aIL10_-1_UNS	aIL10	34920	minus_one	aIL10_minus_one	UNS	G06
1639	Sample_81	12	13	0.0173333	8.75699	8.40946	2.45679	Sample_81	AI_export_Plate 1 UNS LN_G6_G06_CD8p_CD8_live.fcs	34920_aIL10_-1_UNS	aIL10	34920	minus_one	aIL10_minus_one	UNS	G06
1640	Sample_81	13	8	0.0106667	NA	NA	NA	Sample_81	AI_export_Plate 1 UNS LN_G6_G06_CD8p_CD8_live.fcs	34920_aIL10_-1_UNS	aIL10	34920	minus_one	aIL10_minus_one	UNS	G06
1641	Sample_81	14	0	0	NA	NA	NA	Sample_81	AI_export_Plate 1 UNS LN_G6_G06_CD8p_CD8_live.fcs	34920_aIL10_-1_UNS	aIL10	34920	minus_one	aIL10_minus_one	UNS	G06
1642	Sample_81	15	2	0.00266667	9.04525	9.04525	NA	Sample_81	AI_export_Plate 1 UNS LN_G6_G06_CD8p_CD8_live.fcs	34920_aIL10_-1_UNS	aIL10	34920	minus_one	aIL10_minus_one	UNS	G06
1643	Sample_81	2	191	0.254667	4.39548	4.45411	2.14718	Sample_81	AI_export_Plate 1 UNS LN_G6_G06_CD8p_CD8_live.fcs	34920_aIL10_-1_UNS	aIL10	34920	minus_one	aIL10_minus_one	UNS	G06
1644	Sample_81	3	116	0.154667	3.61026	3.61306	1.60749	Sample_81	AI_export_Plate 1 UNS LN_G6_G06_CD8p_CD8_live.fcs	34920_aIL10_-1_UNS	aIL10	34920	minus_one	aIL10_minus_one	UNS	G06
1645	Sample_81	4	66	0.088	NA	NA	NA	Sample_81	AI_export_Plate 1 UNS LN_G6_G06_CD8p_CD8_live.fcs	34920_aIL10_-1_UNS	aIL10	34920	minus_one	aIL10_minus_one	UNS	G06
1646	Sample_81	5	87	0.116	18.207	18.6219	2.44582	Sample_81	AI_export_Plate 1 UNS LN_G6_G06_CD8p_CD8_live.fcs	34920_aIL10_-1_UNS	aIL10	34920	minus_one	aIL10_minus_one	UNS	G06
1647	Sample_81	6	48	0.064	18.9036	19.0486	0.68255	Sample_81	AI_export_Plate 1 UNS LN_G6_G06_CD8p_CD8_live.fcs	34920_aIL10_-1_UNS	aIL10	34920	minus_one	aIL10_minus_one	UNS	G06
1648	Sample_81	7	26	0.0346667	19.0446	19.5961	3.19823	Sample_81	AI_export_Plate 1 UNS LN_G6_G06_CD8p_CD8_live.fcs	34920_aIL10_-1_UNS	aIL10	34920	minus_one	aIL10_minus_one	UNS	G06
1649	Sample_81	8	34	0.0453333	11.2457	11.7595	1.52718	Sample_81	AI_export_Plate 1 UNS LN_G6_G06_CD8p_CD8_live.fcs	34920_aIL10_-1_UNS	aIL10	34920	minus_one	aIL10_minus_one	UNS	G06
1650	Sample_81	9	24	0.032	15.8128	15.8629	0.776173	Sample_81	AI_export_Plate 1 UNS LN_G6_G06_CD8p_CD8_live.fcs	34920_aIL10_-1_UNS	aIL10	34920	minus_one	aIL10_minus_one	UNS	G06
1651	Sample_82	1	124	0.165333	21.4046	21.6844	2.57791	Sample_82	AI_export_Plate 1 UNS LN_G7_G07_CD8p_CD8_live.fcs	34930_aIL10_-1_UNS	aIL10	34930	minus_one	aIL10_minus_one	UNS	G07
1652	Sample_82	10	33	0.044	16.2251	16.5588	1.97058	Sample_82	AI_export_Plate 1 UNS LN_G7_G07_CD8p_CD8_live.fcs	34930_aIL10_-1_UNS	aIL10	34930	minus_one	aIL10_minus_one	UNS	G07
1653	Sample_82	11	32	0.0426667	19.1494	19.5483	0.999186	Sample_82	AI_export_Plate 1 UNS LN_G7_G07_CD8p_CD8_live.fcs	34930_aIL10_-1_UNS	aIL10	34930	minus_one	aIL10_minus_one	UNS	G07
1654	Sample_82	12	8	0.0106667	8.67893	8.26013	3.09172	Sample_82	AI_export_Plate 1 UNS LN_G7_G07_CD8p_CD8_live.fcs	34930_aIL10_-1_UNS	aIL10	34930	minus_one	aIL10_minus_one	UNS	G07
1655	Sample_82	13	16	0.0213333	NA	NA	NA	Sample_82	AI_export_Plate 1 UNS LN_G7_G07_CD8p_CD8_live.fcs	34930_aIL10_-1_UNS	aIL10	34930	minus_one	aIL10_minus_one	UNS	G07
1656	Sample_82	14	1	0.00133333	19.421	19.421	NA	Sample_82	AI_export_Plate 1 UNS LN_G7_G07_CD8p_CD8_live.fcs	34930_aIL10_-1_UNS	aIL10	34930	minus_one	aIL10_minus_one	UNS	G07
1657	Sample_82	15	1	0.00133333	24.7633	24.7633	NA	Sample_82	AI_export_Plate 1 UNS LN_G7_G07_CD8p_CD8_live.fcs	34930_aIL10_-1_UNS	aIL10	34930	minus_one	aIL10_minus_one	UNS	G07
1658	Sample_82	2	118	0.157333	4.21411	4.44526	2.47163	Sample_82	AI_export_Plate 1 UNS LN_G7_G07_CD8p_CD8_live.fcs	34930_aIL10_-1_UNS	aIL10	34930	minus_one	aIL10_minus_one	UNS	G07
1659	Sample_82	3	78	0.104	3.60478	3.54727	1.90127	Sample_82	AI_export_Plate 1 UNS LN_G7_G07_CD8p_CD8_live.fcs	34930_aIL10_-1_UNS	aIL10	34930	minus_one	aIL10_minus_one	UNS	G07
1660	Sample_82	4	115	0.153333	14.6769	14.6769	1.49706	Sample_82	AI_export_Plate 1 UNS LN_G7_G07_CD8p_CD8_live.fcs	34930_aIL10_-1_UNS	aIL10	34930	minus_one	aIL10_minus_one	UNS	G07
1661	Sample_82	5	105	0.14	18.5123	18.8075	2.16256	Sample_82	AI_export_Plate 1 UNS LN_G7_G07_CD8p_CD8_live.fcs	34930_aIL10_-1_UNS	aIL10	34930	minus_one	aIL10_minus_one	UNS	G07
1662	Sample_82	6	22	0.0293333	19.1091	19.1091	NA	Sample_82	AI_export_Plate 1 UNS LN_G7_G07_CD8p_CD8_live.fcs	34930_aIL10_-1_UNS	aIL10	34930	minus_one	aIL10_minus_one	UNS	G07
1663	Sample_82	7	23	0.0306667	19.5406	19.5961	0.577976	Sample_82	AI_export_Plate 1 UNS LN_G7_G07_CD8p_CD8_live.fcs	34930_aIL10_-1_UNS	aIL10	34930	minus_one	aIL10_minus_one	UNS	G07
1664	Sample_82	8	36	0.048	11.7584	12.1127	1.67179	Sample_82	AI_export_Plate 1 UNS LN_G7_G07_CD8p_CD8_live.fcs	34930_aIL10_-1_UNS	aIL10	34930	minus_one	aIL10_minus_one	UNS	G07
1665	Sample_82	9	38	0.0506667	16.0496	15.8914	1.00395	Sample_82	AI_export_Plate 1 UNS LN_G7_G07_CD8p_CD8_live.fcs	34930_aIL10_-1_UNS	aIL10	34930	minus_one	aIL10_minus_one	UNS	G07
1666	Sample_83	1	97	0.129333	21.5567	21.7506	2.55111	Sample_83	AI_export_Plate 1 UNS LN_G8_G08_CD8p_CD8_live.fcs	REq17_Control_-1_UNS	Control	REq17	minus_one	Control_minus_one	UNS	G08
1667	Sample_83	10	19	0.0253333	15.0719	15.6816	2.76479	Sample_83	AI_export_Plate 1 UNS LN_G8_G08_CD8p_CD8_live.fcs	REq17_Control_-1_UNS	Control	REq17	minus_one	Control_minus_one	UNS	G08
1668	Sample_83	11	7	0.00933333	17.5863	19.5483	5.19073	Sample_83	AI_export_Plate 1 UNS LN_G8_G08_CD8p_CD8_live.fcs	REq17_Control_-1_UNS	Control	REq17	minus_one	Control_minus_one	UNS	G08
1669	Sample_83	12	20	0.0266667	8.27365	8.23604	0.509376	Sample_83	AI_export_Plate 1 UNS LN_G8_G08_CD8p_CD8_live.fcs	REq17_Control_-1_UNS	Control	REq17	minus_one	Control_minus_one	UNS	G08
1670	Sample_83	13	26	0.0346667	17.5729	17.5729	NA	Sample_83	AI_export_Plate 1 UNS LN_G8_G08_CD8p_CD8_live.fcs	REq17_Control_-1_UNS	Control	REq17	minus_one	Control_minus_one	UNS	G08
1671	Sample_83	14	0	0	NA	NA	NA	Sample_83	AI_export_Plate 1 UNS LN_G8_G08_CD8p_CD8_live.fcs	REq17_Control_-1_UNS	Control	REq17	minus_one	Control_minus_one	UNS	G08
1672	Sample_83	15	2	0.00266667	9.34254	9.34254	8.62169e-10	Sample_83	AI_export_Plate 1 UNS LN_G8_G08_CD8p_CD8_live.fcs	REq17_Control_-1_UNS	Control	REq17	minus_one	Control_minus_one	UNS	G08
1673	Sample_83	2	188	0.250667	4.08724	4.14734	1.98493	Sample_83	AI_export_Plate 1 UNS LN_G8_G08_CD8p_CD8_live.fcs	REq17_Control_-1_UNS	Control	REq17	minus_one	Control_minus_one	UNS	G08
1674	Sample_83	3	147	0.196	3.75852	3.66676	1.57003	Sample_83	AI_export_Plate 1 UNS LN_G8_G08_CD8p_CD8_live.fcs	REq17_Control_-1_UNS	Control	REq17	minus_one	Control_minus_one	UNS	G08
1675	Sample_83	4	79	0.105333	NA	NA	NA	Sample_83	AI_export_Plate 1 UNS LN_G8_G08_CD8p_CD8_live.fcs	REq17_Control_-1_UNS	Control	REq17	minus_one	Control_minus_one	UNS	G08
1676	Sample_83	5	66	0.088	19.0513	19.2104	1.17249	Sample_83	AI_export_Plate 1 UNS LN_G8_G08_CD8p_CD8_live.fcs	REq17_Control_-1_UNS	Control	REq17	minus_one	Control_minus_one	UNS	G08
1677	Sample_83	6	27	0.036	NA	NA	NA	Sample_83	AI_export_Plate 1 UNS LN_G8_G08_CD8p_CD8_live.fcs	REq17_Control_-1_UNS	Control	REq17	minus_one	Control_minus_one	UNS	G08
1678	Sample_83	7	10	0.0133333	19.3	19.5961	0.469272	Sample_83	AI_export_Plate 1 UNS LN_G8_G08_CD8p_CD8_live.fcs	REq17_Control_-1_UNS	Control	REq17	minus_one	Control_minus_one	UNS	G08
1679	Sample_83	8	20	0.0266667	12.693	12.6581	1.52494	Sample_83	AI_export_Plate 1 UNS LN_G8_G08_CD8p_CD8_live.fcs	REq17_Control_-1_UNS	Control	REq17	minus_one	Control_minus_one	UNS	G08
1680	Sample_83	9	42	0.056	16.0119	15.8914	2.67072	Sample_83	AI_export_Plate 1 UNS LN_G8_G08_CD8p_CD8_live.fcs	REq17_Control_-1_UNS	Control	REq17	minus_one	Control_minus_one	UNS	G08
1681	Sample_84	1	135	0.18	21.8072	22.3342	2.31071	Sample_84	AI_export_Plate 1 UNS LN_G9_G09_CD8p_CD8_live.fcs	RGr17_aIL10_-1_UNS	aIL10	RGr17	minus_one	aIL10_minus_one	UNS	G09
1682	Sample_84	10	17	0.0226667	15.5545	15.7355	2.35774	Sample_84	AI_export_Plate 1 UNS LN_G9_G09_CD8p_CD8_live.fcs	RGr17_aIL10_-1_UNS	aIL10	RGr17	minus_one	aIL10_minus_one	UNS	G09
1683	Sample_84	11	25	0.0333333	18.9646	19.5483	1.47447	Sample_84	AI_export_Plate 1 UNS LN_G9_G09_CD8p_CD8_live.fcs	RGr17_aIL10_-1_UNS	aIL10	RGr17	minus_one	aIL10_minus_one	UNS	G09
1684	Sample_84	12	10	0.0133333	8.04992	8.40946	1.53301	Sample_84	AI_export_Plate 1 UNS LN_G9_G09_CD8p_CD8_live.fcs	RGr17_aIL10_-1_UNS	aIL10	RGr17	minus_one	aIL10_minus_one	UNS	G09
1685	Sample_84	13	11	0.0146667	NA	NA	NA	Sample_84	AI_export_Plate 1 UNS LN_G9_G09_CD8p_CD8_live.fcs	RGr17_aIL10_-1_UNS	aIL10	RGr17	minus_one	aIL10_minus_one	UNS	G09
1686	Sample_84	14	0	0	NA	NA	NA	Sample_84	AI_export_Plate 1 UNS LN_G9_G09_CD8p_CD8_live.fcs	RGr17_aIL10_-1_UNS	aIL10	RGr17	minus_one	aIL10_minus_one	UNS	G09
1687	Sample_84	15	0	0	NA	NA	NA	Sample_84	AI_export_Plate 1 UNS LN_G9_G09_CD8p_CD8_live.fcs	RGr17_aIL10_-1_UNS	aIL10	RGr17	minus_one	aIL10_minus_one	UNS	G09
1688	Sample_84	2	187	0.249333	4.41746	4.46776	2.86073	Sample_84	AI_export_Plate 1 UNS LN_G9_G09_CD8p_CD8_live.fcs	RGr17_aIL10_-1_UNS	aIL10	RGr17	minus_one	aIL10_minus_one	UNS	G09
1689	Sample_84	3	129	0.172	3.81542	3.5609	2.37116	Sample_84	AI_export_Plate 1 UNS LN_G9_G09_CD8p_CD8_live.fcs	RGr17_aIL10_-1_UNS	aIL10	RGr17	minus_one	aIL10_minus_one	UNS	G09
1690	Sample_84	4	59	0.0786667	NA	NA	NA	Sample_84	AI_export_Plate 1 UNS LN_G9_G09_CD8p_CD8_live.fcs	RGr17_aIL10_-1_UNS	aIL10	RGr17	minus_one	aIL10_minus_one	UNS	G09
1691	Sample_84	5	64	0.0853333	18.9001	19.1972	1.18307	Sample_84	AI_export_Plate 1 UNS LN_G9_G09_CD8p_CD8_live.fcs	RGr17_aIL10_-1_UNS	aIL10	RGr17	minus_one	aIL10_minus_one	UNS	G09
1692	Sample_84	6	14	0.0186667	NA	NA	NA	Sample_84	AI_export_Plate 1 UNS LN_G9_G09_CD8p_CD8_live.fcs	RGr17_aIL10_-1_UNS	aIL10	RGr17	minus_one	aIL10_minus_one	UNS	G09
1693	Sample_84	7	26	0.0346667	19.4692	19.5961	0.263408	Sample_84	AI_export_Plate 1 UNS LN_G9_G09_CD8p_CD8_live.fcs	RGr17_aIL10_-1_UNS	aIL10	RGr17	minus_one	aIL10_minus_one	UNS	G09
1694	Sample_84	8	43	0.0573333	11.7969	11.8934	2.55226	Sample_84	AI_export_Plate 1 UNS LN_G9_G09_CD8p_CD8_live.fcs	RGr17_aIL10_-1_UNS	aIL10	RGr17	minus_one	aIL10_minus_one	UNS	G09
1695	Sample_84	9	30	0.04	15.6065	15.9107	1.90284	Sample_84	AI_export_Plate 1 UNS LN_G9_G09_CD8p_CD8_live.fcs	RGr17_aIL10_-1_UNS	aIL10	RGr17	minus_one	aIL10_minus_one	UNS	G09
1696	Sample_85	1	110	0.146667	21.6282	21.9429	2.94078	Sample_85	AI_export_Plate 1 UNS LN_H1_H01_CD8p_CD8_live.fcs	34918_aIL10+aPD1_7_UNS	aIL10+aPD1	34918	seven	aIL10+aPD1_seven	UNS	H01
1697	Sample_85	10	17	0.0226667	14.0919	15.8134	3.77441	Sample_85	AI_export_Plate 1 UNS LN_H1_H01_CD8p_CD8_live.fcs	34918_aIL10+aPD1_7_UNS	aIL10+aPD1	34918	seven	aIL10+aPD1_seven	UNS	H01
1698	Sample_85	11	16	0.0213333	15.9218	19.5483	7.02465	Sample_85	AI_export_Plate 1 UNS LN_H1_H01_CD8p_CD8_live.fcs	34918_aIL10+aPD1_7_UNS	aIL10+aPD1	34918	seven	aIL10+aPD1_seven	UNS	H01
1699	Sample_85	12	29	0.0386667	8.47548	8.46389	1.05028	Sample_85	AI_export_Plate 1 UNS LN_H1_H01_CD8p_CD8_live.fcs	34918_aIL10+aPD1_7_UNS	aIL10+aPD1	34918	seven	aIL10+aPD1_seven	UNS	H01
1700	Sample_85	13	10	0.0133333	8.69682	8.69682	NA	Sample_85	AI_export_Plate 1 UNS LN_H1_H01_CD8p_CD8_live.fcs	34918_aIL10+aPD1_7_UNS	aIL10+aPD1	34918	seven	aIL10+aPD1_seven	UNS	H01
1701	Sample_85	14	0	0	NA	NA	NA	Sample_85	AI_export_Plate 1 UNS LN_H1_H01_CD8p_CD8_live.fcs	34918_aIL10+aPD1_7_UNS	aIL10+aPD1	34918	seven	aIL10+aPD1_seven	UNS	H01
1702	Sample_85	15	1	0.00133333	9.34254	9.34254	NA	Sample_85	AI_export_Plate 1 UNS LN_H1_H01_CD8p_CD8_live.fcs	34918_aIL10+aPD1_7_UNS	aIL10+aPD1	34918	seven	aIL10+aPD1_seven	UNS	H01
1703	Sample_85	2	196	0.261333	4.38626	4.52145	2.34587	Sample_85	AI_export_Plate 1 UNS LN_H1_H01_CD8p_CD8_live.fcs	34918_aIL10+aPD1_7_UNS	aIL10+aPD1	34918	seven	aIL10+aPD1_seven	UNS	H01
1704	Sample_85	3	258	0.344	3.63522	3.39554	2.38861	Sample_85	AI_export_Plate 1 UNS LN_H1_H01_CD8p_CD8_live.fcs	34918_aIL10+aPD1_7_UNS	aIL10+aPD1	34918	seven	aIL10+aPD1_seven	UNS	H01
1705	Sample_85	4	14	0.0186667	NA	NA	NA	Sample_85	AI_export_Plate 1 UNS LN_H1_H01_CD8p_CD8_live.fcs	34918_aIL10+aPD1_7_UNS	aIL10+aPD1	34918	seven	aIL10+aPD1_seven	UNS	H01
1706	Sample_85	5	58	0.0773333	18.9847	18.9857	0.925532	Sample_85	AI_export_Plate 1 UNS LN_H1_H01_CD8p_CD8_live.fcs	34918_aIL10+aPD1_7_UNS	aIL10+aPD1	34918	seven	aIL10+aPD1_seven	UNS	H01
1707	Sample_85	6	2	0.00266667	NA	NA	NA	Sample_85	AI_export_Plate 1 UNS LN_H1_H01_CD8p_CD8_live.fcs	34918_aIL10+aPD1_7_UNS	aIL10+aPD1	34918	seven	aIL10+aPD1_seven	UNS	H01
1708	Sample_85	7	5	0.00666667	19.5773	19.5961	0.0420382	Sample_85	AI_export_Plate 1 UNS LN_H1_H01_CD8p_CD8_live.fcs	34918_aIL10+aPD1_7_UNS	aIL10+aPD1	34918	seven	aIL10+aPD1_seven	UNS	H01
1709	Sample_85	8	21	0.028	11.2395	11.7595	1.23705	Sample_85	AI_export_Plate 1 UNS LN_H1_H01_CD8p_CD8_live.fcs	34918_aIL10+aPD1_7_UNS	aIL10+aPD1	34918	seven	aIL10+aPD1_seven	UNS	H01
1710	Sample_85	9	13	0.0173333	16.495	15.8914	1.25595	Sample_85	AI_export_Plate 1 UNS LN_H1_H01_CD8p_CD8_live.fcs	34918_aIL10+aPD1_7_UNS	aIL10+aPD1	34918	seven	aIL10+aPD1_seven	UNS	H01
1711	Sample_86	1	153	0.204	21.9154	22.1887	2.34398	Sample_86	AI_export_Plate 1 UNS LN_H10_H10_CD8p_CD8_live.fcs	REq17_Control_7_UNS	Control	REq17	seven	Control_seven	UNS	H10
1712	Sample_86	10	16	0.0213333	15.8388	15.7355	2.49517	Sample_86	AI_export_Plate 1 UNS LN_H10_H10_CD8p_CD8_live.fcs	REq17_Control_7_UNS	Control	REq17	seven	Control_seven	UNS	H10
1713	Sample_86	11	42	0.056	19.5023	19.5483	1.03417	Sample_86	AI_export_Plate 1 UNS LN_H10_H10_CD8p_CD8_live.fcs	REq17_Control_7_UNS	Control	REq17	seven	Control_seven	UNS	H10
1714	Sample_86	12	16	0.0213333	8.87901	8.5584	1.27258	Sample_86	AI_export_Plate 1 UNS LN_H10_H10_CD8p_CD8_live.fcs	REq17_Control_7_UNS	Control	REq17	seven	Control_seven	UNS	H10
1715	Sample_86	13	3	0.004	NA	NA	NA	Sample_86	AI_export_Plate 1 UNS LN_H10_H10_CD8p_CD8_live.fcs	REq17_Control_7_UNS	Control	REq17	seven	Control_seven	UNS	H10
1716	Sample_86	14	0	0	NA	NA	NA	Sample_86	AI_export_Plate 1 UNS LN_H10_H10_CD8p_CD8_live.fcs	REq17_Control_7_UNS	Control	REq17	seven	Control_seven	UNS	H10
1717	Sample_86	15	0	0	NA	NA	NA	Sample_86	AI_export_Plate 1 UNS LN_H10_H10_CD8p_CD8_live.fcs	REq17_Control_7_UNS	Control	REq17	seven	Control_seven	UNS	H10
1718	Sample_86	2	156	0.208	4.44048	4.52145	2.47192	Sample_86	AI_export_Plate 1 UNS LN_H10_H10_CD8p_CD8_live.fcs	REq17_Control_7_UNS	Control	REq17	seven	Control_seven	UNS	H10
1719	Sample_86	3	150	0.2	3.58287	3.49464	2.41218	Sample_86	AI_export_Plate 1 UNS LN_H10_H10_CD8p_CD8_live.fcs	REq17_Control_7_UNS	Control	REq17	seven	Control_seven	UNS	H10
1720	Sample_86	4	27	0.036	NA	NA	NA	Sample_86	AI_export_Plate 1 UNS LN_H10_H10_CD8p_CD8_live.fcs	REq17_Control_7_UNS	Control	REq17	seven	Control_seven	UNS	H10
1721	Sample_86	5	91	0.121333	19.0192	19.299	1.7467	Sample_86	AI_export_Plate 1 UNS LN_H10_H10_CD8p_CD8_live.fcs	REq17_Control_7_UNS	Control	REq17	seven	Control_seven	UNS	H10
1722	Sample_86	6	16	0.0213333	NA	NA	NA	Sample_86	AI_export_Plate 1 UNS LN_H10_H10_CD8p_CD8_live.fcs	REq17_Control_7_UNS	Control	REq17	seven	Control_seven	UNS	H10
1723	Sample_86	7	23	0.0306667	19.6457	19.5961	0.285523	Sample_86	AI_export_Plate 1 UNS LN_H10_H10_CD8p_CD8_live.fcs	REq17_Control_7_UNS	Control	REq17	seven	Control_seven	UNS	H10
1724	Sample_86	8	29	0.0386667	12.0208	11.8043	2.84476	Sample_86	AI_export_Plate 1 UNS LN_H10_H10_CD8p_CD8_live.fcs	REq17_Control_7_UNS	Control	REq17	seven	Control_seven	UNS	H10
1725	Sample_86	9	28	0.0373333	16.0071	15.8914	1.11068	Sample_86	AI_export_Plate 1 UNS LN_H10_H10_CD8p_CD8_live.fcs	REq17_Control_7_UNS	Control	REq17	seven	Control_seven	UNS	H10
1726	Sample_87	1	134	0.178667	21.838	22.5043	2.87875	Sample_87	AI_export_Plate 1 UNS LN_H11_H11_CD8p_CD8_live.fcs	RGr17_aIL10_7_UNS	aIL10	RGr17	seven	aIL10_seven	UNS	H11
1727	Sample_87	10	11	0.0146667	14.2997	15.08	3.06922	Sample_87	AI_export_Plate 1 UNS LN_H11_H11_CD8p_CD8_live.fcs	RGr17_aIL10_7_UNS	aIL10	RGr17	seven	aIL10_seven	UNS	H11
1728	Sample_87	11	14	0.0186667	18.0242	19.5483	4.23787	Sample_87	AI_export_Plate 1 UNS LN_H11_H11_CD8p_CD8_live.fcs	RGr17_aIL10_7_UNS	aIL10	RGr17	seven	aIL10_seven	UNS	H11
1729	Sample_87	12	8	0.0106667	8.03724	8.64187	1.80103	Sample_87	AI_export_Plate 1 UNS LN_H11_H11_CD8p_CD8_live.fcs	RGr17_aIL10_7_UNS	aIL10	RGr17	seven	aIL10_seven	UNS	H11
1730	Sample_87	13	4	0.00533333	11.7014	11.7014	NA	Sample_87	AI_export_Plate 1 UNS LN_H11_H11_CD8p_CD8_live.fcs	RGr17_aIL10_7_UNS	aIL10	RGr17	seven	aIL10_seven	UNS	H11
1731	Sample_87	14	1	0.00133333	0.56396	0.56396	NA	Sample_87	AI_export_Plate 1 UNS LN_H11_H11_CD8p_CD8_live.fcs	RGr17_aIL10_7_UNS	aIL10	RGr17	seven	aIL10_seven	UNS	H11
1732	Sample_87	15	2	0.00266667	17.0529	17.0529	10.9041	Sample_87	AI_export_Plate 1 UNS LN_H11_H11_CD8p_CD8_live.fcs	RGr17_aIL10_7_UNS	aIL10	RGr17	seven	aIL10_seven	UNS	H11
1733	Sample_87	2	211	0.281333	4.00249	3.93023	2.19432	Sample_87	AI_export_Plate 1 UNS LN_H11_H11_CD8p_CD8_live.fcs	RGr17_aIL10_7_UNS	aIL10	RGr17	seven	aIL10_seven	UNS	H11
1734	Sample_87	3	224	0.298667	3.5614	3.55333	1.5015	Sample_87	AI_export_Plate 1 UNS LN_H11_H11_CD8p_CD8_live.fcs	RGr17_aIL10_7_UNS	aIL10	RGr17	seven	aIL10_seven	UNS	H11
1735	Sample_87	4	23	0.0306667	17.4492	17.4492	2.2031	Sample_87	AI_export_Plate 1 UNS LN_H11_H11_CD8p_CD8_live.fcs	RGr17_aIL10_7_UNS	aIL10	RGr17	seven	aIL10_seven	UNS	H11
1736	Sample_87	5	47	0.0626667	18.8393	19.299	2.30948	Sample_87	AI_export_Plate 1 UNS LN_H11_H11_CD8p_CD8_live.fcs	RGr17_aIL10_7_UNS	aIL10	RGr17	seven	aIL10_seven	UNS	H11
1737	Sample_87	6	8	0.0106667	NA	NA	NA	Sample_87	AI_export_Plate 1 UNS LN_H11_H11_CD8p_CD8_live.fcs	RGr17_aIL10_7_UNS	aIL10	RGr17	seven	aIL10_seven	UNS	H11
1738	Sample_87	7	12	0.016	19.3639	19.5713	0.281638	Sample_87	AI_export_Plate 1 UNS LN_H11_H11_CD8p_CD8_live.fcs	RGr17_aIL10_7_UNS	aIL10	RGr17	seven	aIL10_seven	UNS	H11
1739	Sample_87	8	35	0.0466667	11.9358	11.7868	1.7133	Sample_87	AI_export_Plate 1 UNS LN_H11_H11_CD8p_CD8_live.fcs	RGr17_aIL10_7_UNS	aIL10	RGr17	seven	aIL10_seven	UNS	H11
1740	Sample_87	9	16	0.0213333	15.5112	15.585	1.75281	Sample_87	AI_export_Plate 1 UNS LN_H11_H11_CD8p_CD8_live.fcs	RGr17_aIL10_7_UNS	aIL10	RGr17	seven	aIL10_seven	UNS	H11
1741	Sample_88	1	85	0.113333	21.5598	21.7992	2.60458	Sample_88	AI_export_Plate 1 UNS LN_H12_H12_CD8p_CD8_live.fcs	RVi17_Control_7_UNS	Control	RVi17	seven	Control_seven	UNS	H12
1742	Sample_88	10	22	0.0293333	14.3937	15.7355	3.17732	Sample_88	AI_export_Plate 1 UNS LN_H12_H12_CD8p_CD8_live.fcs	RVi17_Control_7_UNS	Control	RVi17	seven	Control_seven	UNS	H12
1743	Sample_88	11	34	0.0453333	18.2877	19.5483	3.84232	Sample_88	AI_export_Plate 1 UNS LN_H12_H12_CD8p_CD8_live.fcs	RVi17_Control_7_UNS	Control	RVi17	seven	Control_seven	UNS	H12
1744	Sample_88	12	10	0.0133333	9.08722	8.63314	1.41172	Sample_88	AI_export_Plate 1 UNS LN_H12_H12_CD8p_CD8_live.fcs	RVi17_Control_7_UNS	Control	RVi17	seven	Control_seven	UNS	H12
1745	Sample_88	13	9	0.012	NA	NA	NA	Sample_88	AI_export_Plate 1 UNS LN_H12_H12_CD8p_CD8_live.fcs	RVi17_Control_7_UNS	Control	RVi17	seven	Control_seven	UNS	H12
1746	Sample_88	14	0	0	NA	NA	NA	Sample_88	AI_export_Plate 1 UNS LN_H12_H12_CD8p_CD8_live.fcs	RVi17_Control_7_UNS	Control	RVi17	seven	Control_seven	UNS	H12
1747	Sample_88	15	0	0	NA	NA	NA	Sample_88	AI_export_Plate 1 UNS LN_H12_H12_CD8p_CD8_live.fcs	RVi17_Control_7_UNS	Control	RVi17	seven	Control_seven	UNS	H12
1748	Sample_88	2	191	0.254667	4.22366	4.31843	1.93164	Sample_88	AI_export_Plate 1 UNS LN_H12_H12_CD8p_CD8_live.fcs	RVi17_Control_7_UNS	Control	RVi17	seven	Control_seven	UNS	H12
1749	Sample_88	3	177	0.236	3.83619	3.66676	2.60639	Sample_88	AI_export_Plate 1 UNS LN_H12_H12_CD8p_CD8_live.fcs	RVi17_Control_7_UNS	Control	RVi17	seven	Control_seven	UNS	H12
1750	Sample_88	4	47	0.0626667	NA	NA	NA	Sample_88	AI_export_Plate 1 UNS LN_H12_H12_CD8p_CD8_live.fcs	RVi17_Control_7_UNS	Control	RVi17	seven	Control_seven	UNS	H12
1751	Sample_88	5	67	0.0893333	18.7139	18.9447	2.1498	Sample_88	AI_export_Plate 1 UNS LN_H12_H12_CD8p_CD8_live.fcs	RVi17_Control_7_UNS	Control	RVi17	seven	Control_seven	UNS	H12
1752	Sample_88	6	16	0.0213333	19.5961	19.5961	NA	Sample_88	AI_export_Plate 1 UNS LN_H12_H12_CD8p_CD8_live.fcs	RVi17_Control_7_UNS	Control	RVi17	seven	Control_seven	UNS	H12
1753	Sample_88	7	13	0.0173333	19.4735	19.5025	0.176437	Sample_88	AI_export_Plate 1 UNS LN_H12_H12_CD8p_CD8_live.fcs	RVi17_Control_7_UNS	Control	RVi17	seven	Control_seven	UNS	H12
1754	Sample_88	8	63	0.084	11.4527	11.3976	1.52893	Sample_88	AI_export_Plate 1 UNS LN_H12_H12_CD8p_CD8_live.fcs	RVi17_Control_7_UNS	Control	RVi17	seven	Control_seven	UNS	H12
1755	Sample_88	9	16	0.0213333	15.8866	15.8914	2.66468	Sample_88	AI_export_Plate 1 UNS LN_H12_H12_CD8p_CD8_live.fcs	RVi17_Control_7_UNS	Control	RVi17	seven	Control_seven	UNS	H12
1756	Sample_89	1	159	0.212	22.3199	22.9931	2.41984	Sample_89	AI_export_Plate 1 UNS LN_H2_H02_CD8p_CD8_live.fcs	RBf17_aIL10+aPD1_7_UNS	aIL10+aPD1	RBf17	seven	aIL10+aPD1_seven	UNS	H02
1757	Sample_89	10	17	0.0226667	15.0038	15.5743	2.49695	Sample_89	AI_export_Plate 1 UNS LN_H2_H02_CD8p_CD8_live.fcs	RBf17_aIL10+aPD1_7_UNS	aIL10+aPD1	RBf17	seven	aIL10+aPD1_seven	UNS	H02
1758	Sample_89	11	16	0.0213333	19.3169	19.5483	1.72228	Sample_89	AI_export_Plate 1 UNS LN_H2_H02_CD8p_CD8_live.fcs	RBf17_aIL10+aPD1_7_UNS	aIL10+aPD1	RBf17	seven	aIL10+aPD1_seven	UNS	H02
1759	Sample_89	12	11	0.0146667	8.55677	8.40946	0.783475	Sample_89	AI_export_Plate 1 UNS LN_H2_H02_CD8p_CD8_live.fcs	RBf17_aIL10+aPD1_7_UNS	aIL10+aPD1	RBf17	seven	aIL10+aPD1_seven	UNS	H02
1760	Sample_89	13	3	0.004	NA	NA	NA	Sample_89	AI_export_Plate 1 UNS LN_H2_H02_CD8p_CD8_live.fcs	RBf17_aIL10+aPD1_7_UNS	aIL10+aPD1	RBf17	seven	aIL10+aPD1_seven	UNS	H02
1761	Sample_89	14	0	0	NA	NA	NA	Sample_89	AI_export_Plate 1 UNS LN_H2_H02_CD8p_CD8_live.fcs	RBf17_aIL10+aPD1_7_UNS	aIL10+aPD1	RBf17	seven	aIL10+aPD1_seven	UNS	H02
1762	Sample_89	15	1	0.00133333	24.7633	24.7633	NA	Sample_89	AI_export_Plate 1 UNS LN_H2_H02_CD8p_CD8_live.fcs	RBf17_aIL10+aPD1_7_UNS	aIL10+aPD1	RBf17	seven	aIL10+aPD1_seven	UNS	H02
1763	Sample_89	2	161	0.214667	3.94508	4.08978	1.87795	Sample_89	AI_export_Plate 1 UNS LN_H2_H02_CD8p_CD8_live.fcs	RBf17_aIL10+aPD1_7_UNS	aIL10+aPD1	RBf17	seven	aIL10+aPD1_seven	UNS	H02
1764	Sample_89	3	178	0.237333	4.01745	3.66676	2.83085	Sample_89	AI_export_Plate 1 UNS LN_H2_H02_CD8p_CD8_live.fcs	RBf17_aIL10+aPD1_7_UNS	aIL10+aPD1	RBf17	seven	aIL10+aPD1_seven	UNS	H02
1765	Sample_89	4	52	0.0693333	NA	NA	NA	Sample_89	AI_export_Plate 1 UNS LN_H2_H02_CD8p_CD8_live.fcs	RBf17_aIL10+aPD1_7_UNS	aIL10+aPD1	RBf17	seven	aIL10+aPD1_seven	UNS	H02
1766	Sample_89	5	51	0.068	18.9201	18.8469	0.965442	Sample_89	AI_export_Plate 1 UNS LN_H2_H02_CD8p_CD8_live.fcs	RBf17_aIL10+aPD1_7_UNS	aIL10+aPD1	RBf17	seven	aIL10+aPD1_seven	UNS	H02
1767	Sample_89	6	10	0.0133333	NA	NA	NA	Sample_89	AI_export_Plate 1 UNS LN_H2_H02_CD8p_CD8_live.fcs	RBf17_aIL10+aPD1_7_UNS	aIL10+aPD1	RBf17	seven	aIL10+aPD1_seven	UNS	H02
1768	Sample_89	7	5	0.00666667	19.5955	19.5961	0.00113929	Sample_89	AI_export_Plate 1 UNS LN_H2_H02_CD8p_CD8_live.fcs	RBf17_aIL10+aPD1_7_UNS	aIL10+aPD1	RBf17	seven	aIL10+aPD1_seven	UNS	H02
1769	Sample_89	8	64	0.0853333	11.9127	11.7856	2.02196	Sample_89	AI_export_Plate 1 UNS LN_H2_H02_CD8p_CD8_live.fcs	RBf17_aIL10+aPD1_7_UNS	aIL10+aPD1	RBf17	seven	aIL10+aPD1_seven	UNS	H02
1770	Sample_89	9	22	0.0293333	16.5794	16.215	2.9005	Sample_89	AI_export_Plate 1 UNS LN_H2_H02_CD8p_CD8_live.fcs	RBf17_aIL10+aPD1_7_UNS	aIL10+aPD1	RBf17	seven	aIL10+aPD1_seven	UNS	H02
1771	Sample_9	1	141	0.188	21.9246	22.2626	2.36103	Sample_9	AI_export_Plate 1 UNS LN_A6_A06_CD8p_CD8_live.fcs	RNy16_aIL10+aPD1_-1_UNS	aIL10+aPD1	RNy16	minus_one	aIL10+aPD1_minus_one	UNS	A06
1772	Sample_9	10	28	0.0373333	15.4071	15.7355	2.60337	Sample_9	AI_export_Plate 1 UNS LN_A6_A06_CD8p_CD8_live.fcs	RNy16_aIL10+aPD1_-1_UNS	aIL10+aPD1	RNy16	minus_one	aIL10+aPD1_minus_one	UNS	A06
1773	Sample_9	11	38	0.0506667	19.4771	19.5483	0.880396	Sample_9	AI_export_Plate 1 UNS LN_A6_A06_CD8p_CD8_live.fcs	RNy16_aIL10+aPD1_-1_UNS	aIL10+aPD1	RNy16	minus_one	aIL10+aPD1_minus_one	UNS	A06
1774	Sample_9	12	16	0.0213333	9.01136	9.02524	1.13023	Sample_9	AI_export_Plate 1 UNS LN_A6_A06_CD8p_CD8_live.fcs	RNy16_aIL10+aPD1_-1_UNS	aIL10+aPD1	RNy16	minus_one	aIL10+aPD1_minus_one	UNS	A06
1775	Sample_9	13	2	0.00266667	NA	NA	NA	Sample_9	AI_export_Plate 1 UNS LN_A6_A06_CD8p_CD8_live.fcs	RNy16_aIL10+aPD1_-1_UNS	aIL10+aPD1	RNy16	minus_one	aIL10+aPD1_minus_one	UNS	A06
1776	Sample_9	14	0	0	NA	NA	NA	Sample_9	AI_export_Plate 1 UNS LN_A6_A06_CD8p_CD8_live.fcs	RNy16_aIL10+aPD1_-1_UNS	aIL10+aPD1	RNy16	minus_one	aIL10+aPD1_minus_one	UNS	A06
1777	Sample_9	15	1	0.00133333	NA	NA	NA	Sample_9	AI_export_Plate 1 UNS LN_A6_A06_CD8p_CD8_live.fcs	RNy16_aIL10+aPD1_-1_UNS	aIL10+aPD1	RNy16	minus_one	aIL10+aPD1_minus_one	UNS	A06
1778	Sample_9	2	141	0.188	5.06799	4.73691	3.56926	Sample_9	AI_export_Plate 1 UNS LN_A6_A06_CD8p_CD8_live.fcs	RNy16_aIL10+aPD1_-1_UNS	aIL10+aPD1	RNy16	minus_one	aIL10+aPD1_minus_one	UNS	A06
1779	Sample_9	3	70	0.0933333	3.99276	3.66676	3.1976	Sample_9	AI_export_Plate 1 UNS LN_A6_A06_CD8p_CD8_live.fcs	RNy16_aIL10+aPD1_-1_UNS	aIL10+aPD1	RNy16	minus_one	aIL10+aPD1_minus_one	UNS	A06
1780	Sample_9	4	81	0.108	NA	NA	NA	Sample_9	AI_export_Plate 1 UNS LN_A6_A06_CD8p_CD8_live.fcs	RNy16_aIL10+aPD1_-1_UNS	aIL10+aPD1	RNy16	minus_one	aIL10+aPD1_minus_one	UNS	A06
1781	Sample_9	5	121	0.161333	18.372	18.7047	1.63011	Sample_9	AI_export_Plate 1 UNS LN_A6_A06_CD8p_CD8_live.fcs	RNy16_aIL10+aPD1_-1_UNS	aIL10+aPD1	RNy16	minus_one	aIL10+aPD1_minus_one	UNS	A06
1782	Sample_9	6	19	0.0253333	NA	NA	NA	Sample_9	AI_export_Plate 1 UNS LN_A6_A06_CD8p_CD8_live.fcs	RNy16_aIL10+aPD1_-1_UNS	aIL10+aPD1	RNy16	minus_one	aIL10+aPD1_minus_one	UNS	A06
1783	Sample_9	7	16	0.0213333	19.5222	19.5961	0.168624	Sample_9	AI_export_Plate 1 UNS LN_A6_A06_CD8p_CD8_live.fcs	RNy16_aIL10+aPD1_-1_UNS	aIL10+aPD1	RNy16	minus_one	aIL10+aPD1_minus_one	UNS	A06
1784	Sample_9	8	20	0.0266667	11.8817	12.0682	1.59064	Sample_9	AI_export_Plate 1 UNS LN_A6_A06_CD8p_CD8_live.fcs	RNy16_aIL10+aPD1_-1_UNS	aIL10+aPD1	RNy16	minus_one	aIL10+aPD1_minus_one	UNS	A06
1785	Sample_9	9	56	0.0746667	15.8061	15.8914	0.95039	Sample_9	AI_export_Plate 1 UNS LN_A6_A06_CD8p_CD8_live.fcs	RNy16_aIL10+aPD1_-1_UNS	aIL10+aPD1	RNy16	minus_one	aIL10+aPD1_minus_one	UNS	A06
1786	Sample_90	1	98	0.130667	21.3831	21.5283	2.94125	Sample_90	AI_export_Plate 1 UNS LN_H3_H03_CD8p_CD8_live.fcs	RBv17_aIL10+aPD1_7_UNS	aIL10+aPD1	RBv17	seven	aIL10+aPD1_seven	UNS	H03
1787	Sample_90	10	13	0.0173333	16.0949	16.6688	2.21959	Sample_90	AI_export_Plate 1 UNS LN_H3_H03_CD8p_CD8_live.fcs	RBv17_aIL10+aPD1_7_UNS	aIL10+aPD1	RBv17	seven	aIL10+aPD1_seven	UNS	H03
1788	Sample_90	11	27	0.036	19.3714	19.5483	0.57886	Sample_90	AI_export_Plate 1 UNS LN_H3_H03_CD8p_CD8_live.fcs	RBv17_aIL10+aPD1_7_UNS	aIL10+aPD1	RBv17	seven	aIL10+aPD1_seven	UNS	H03
1789	Sample_90	12	9	0.012	8.22433	8.25485	0.591954	Sample_90	AI_export_Plate 1 UNS LN_H3_H03_CD8p_CD8_live.fcs	RBv17_aIL10+aPD1_7_UNS	aIL10+aPD1	RBv17	seven	aIL10+aPD1_seven	UNS	H03
1790	Sample_90	13	9	0.012	18.0444	18.0444	NA	Sample_90	AI_export_Plate 1 UNS LN_H3_H03_CD8p_CD8_live.fcs	RBv17_aIL10+aPD1_7_UNS	aIL10+aPD1	RBv17	seven	aIL10+aPD1_seven	UNS	H03
1791	Sample_90	14	1	0.00133333	NA	NA	NA	Sample_90	AI_export_Plate 1 UNS LN_H3_H03_CD8p_CD8_live.fcs	RBv17_aIL10+aPD1_7_UNS	aIL10+aPD1	RBv17	seven	aIL10+aPD1_seven	UNS	H03
1792	Sample_90	15	2	0.00266667	9.19389	9.19389	0.210218	Sample_90	AI_export_Plate 1 UNS LN_H3_H03_CD8p_CD8_live.fcs	RBv17_aIL10+aPD1_7_UNS	aIL10+aPD1	RBv17	seven	aIL10+aPD1_seven	UNS	H03
1793	Sample_90	2	230	0.306667	4.26704	4.03616	2.83988	Sample_90	AI_export_Plate 1 UNS LN_H3_H03_CD8p_CD8_live.fcs	RBv17_aIL10+aPD1_7_UNS	aIL10+aPD1	RBv17	seven	aIL10+aPD1_seven	UNS	H03
1794	Sample_90	3	211	0.281333	3.99966	3.56525	2.65119	Sample_90	AI_export_Plate 1 UNS LN_H3_H03_CD8p_CD8_live.fcs	RBv17_aIL10+aPD1_7_UNS	aIL10+aPD1	RBv17	seven	aIL10+aPD1_seven	UNS	H03
1795	Sample_90	4	31	0.0413333	15.454	15.454	NA	Sample_90	AI_export_Plate 1 UNS LN_H3_H03_CD8p_CD8_live.fcs	RBv17_aIL10+aPD1_7_UNS	aIL10+aPD1	RBv17	seven	aIL10+aPD1_seven	UNS	H03
1796	Sample_90	5	47	0.0626667	18.6218	19.299	2.78839	Sample_90	AI_export_Plate 1 UNS LN_H3_H03_CD8p_CD8_live.fcs	RBv17_aIL10+aPD1_7_UNS	aIL10+aPD1	RBv17	seven	aIL10+aPD1_seven	UNS	H03
1797	Sample_90	6	9	0.012	NA	NA	NA	Sample_90	AI_export_Plate 1 UNS LN_H3_H03_CD8p_CD8_live.fcs	RBv17_aIL10+aPD1_7_UNS	aIL10+aPD1	RBv17	seven	aIL10+aPD1_seven	UNS	H03
1798	Sample_90	7	7	0.00933333	19.5831	19.5961	0.0343293	Sample_90	AI_export_Plate 1 UNS LN_H3_H03_CD8p_CD8_live.fcs	RBv17_aIL10+aPD1_7_UNS	aIL10+aPD1	RBv17	seven	aIL10+aPD1_seven	UNS	H03
1799	Sample_90	8	39	0.052	11.318	11.5142	2.44965	Sample_90	AI_export_Plate 1 UNS LN_H3_H03_CD8p_CD8_live.fcs	RBv17_aIL10+aPD1_7_UNS	aIL10+aPD1	RBv17	seven	aIL10+aPD1_seven	UNS	H03
1800	Sample_90	9	17	0.0226667	16.6517	15.9417	1.51643	Sample_90	AI_export_Plate 1 UNS LN_H3_H03_CD8p_CD8_live.fcs	RBv17_aIL10+aPD1_7_UNS	aIL10+aPD1	RBv17	seven	aIL10+aPD1_seven	UNS	H03
1801	Sample_91	1	133	0.177333	21.7796	22.422	3.23475	Sample_91	AI_export_Plate 1 UNS LN_H4_H04_CD8p_CD8_live.fcs	REu17_Control_7_UNS	Control	REu17	seven	Control_seven	UNS	H04
1802	Sample_91	10	25	0.0333333	14.8159	15.6041	1.98854	Sample_91	AI_export_Plate 1 UNS LN_H4_H04_CD8p_CD8_live.fcs	REu17_Control_7_UNS	Control	REu17	seven	Control_seven	UNS	H04
1803	Sample_91	11	13	0.0173333	19.2859	19.5483	0.799948	Sample_91	AI_export_Plate 1 UNS LN_H4_H04_CD8p_CD8_live.fcs	REu17_Control_7_UNS	Control	REu17	seven	Control_seven	UNS	H04
1804	Sample_91	12	9	0.012	8.75804	8.21197	1.61644	Sample_91	AI_export_Plate 1 UNS LN_H4_H04_CD8p_CD8_live.fcs	REu17_Control_7_UNS	Control	REu17	seven	Control_seven	UNS	H04
1805	Sample_91	13	4	0.00533333	NA	NA	NA	Sample_91	AI_export_Plate 1 UNS LN_H4_H04_CD8p_CD8_live.fcs	REu17_Control_7_UNS	Control	REu17	seven	Control_seven	UNS	H04
1806	Sample_91	14	1	0.00133333	3.37743e-07	3.37743e-07	NA	Sample_91	AI_export_Plate 1 UNS LN_H4_H04_CD8p_CD8_live.fcs	REu17_Control_7_UNS	Control	REu17	seven	Control_seven	UNS	H04
1807	Sample_91	15	1	0.00133333	9.34254	9.34254	NA	Sample_91	AI_export_Plate 1 UNS LN_H4_H04_CD8p_CD8_live.fcs	REu17_Control_7_UNS	Control	REu17	seven	Control_seven	UNS	H04
1808	Sample_91	2	223	0.297333	4.09451	4.33886	2.51489	Sample_91	AI_export_Plate 1 UNS LN_H4_H04_CD8p_CD8_live.fcs	REu17_Control_7_UNS	Control	REu17	seven	Control_seven	UNS	H04
1809	Sample_91	3	199	0.265333	3.84955	3.56506	2.36739	Sample_91	AI_export_Plate 1 UNS LN_H4_H04_CD8p_CD8_live.fcs	REu17_Control_7_UNS	Control	REu17	seven	Control_seven	UNS	H04
1810	Sample_91	4	31	0.0413333	NA	NA	NA	Sample_91	AI_export_Plate 1 UNS LN_H4_H04_CD8p_CD8_live.fcs	REu17_Control_7_UNS	Control	REu17	seven	Control_seven	UNS	H04
1811	Sample_91	5	42	0.056	18.4395	18.863	2.37156	Sample_91	AI_export_Plate 1 UNS LN_H4_H04_CD8p_CD8_live.fcs	REu17_Control_7_UNS	Control	REu17	seven	Control_seven	UNS	H04
1812	Sample_91	6	7	0.00933333	NA	NA	NA	Sample_91	AI_export_Plate 1 UNS LN_H4_H04_CD8p_CD8_live.fcs	REu17_Control_7_UNS	Control	REu17	seven	Control_seven	UNS	H04
1813	Sample_91	7	8	0.0106667	19.361	19.5961	0.383536	Sample_91	AI_export_Plate 1 UNS LN_H4_H04_CD8p_CD8_live.fcs	REu17_Control_7_UNS	Control	REu17	seven	Control_seven	UNS	H04
1814	Sample_91	8	31	0.0413333	11.9183	11.8697	1.11289	Sample_91	AI_export_Plate 1 UNS LN_H4_H04_CD8p_CD8_live.fcs	REu17_Control_7_UNS	Control	REu17	seven	Control_seven	UNS	H04
1815	Sample_91	9	23	0.0306667	16.3185	15.8914	2.03035	Sample_91	AI_export_Plate 1 UNS LN_H4_H04_CD8p_CD8_live.fcs	REu17_Control_7_UNS	Control	REu17	seven	Control_seven	UNS	H04
1816	Sample_92	1	63	0.084	21.8347	22.4267	2.86956	Sample_92	AI_export_Plate 1 UNS LN_H5_H05_CD8p_CD8_live.fcs	RKq17_aIL10+aPD1_7_UNS	aIL10+aPD1	RKq17	seven	aIL10+aPD1_seven	UNS	H05
1817	Sample_92	10	16	0.0213333	12.4676	14.2028	4.62305	Sample_92	AI_export_Plate 1 UNS LN_H5_H05_CD8p_CD8_live.fcs	RKq17_aIL10+aPD1_7_UNS	aIL10+aPD1	RKq17	seven	aIL10+aPD1_seven	UNS	H05
1818	Sample_92	11	13	0.0173333	19.2911	19.5483	0.800031	Sample_92	AI_export_Plate 1 UNS LN_H5_H05_CD8p_CD8_live.fcs	RKq17_aIL10+aPD1_7_UNS	aIL10+aPD1	RKq17	seven	aIL10+aPD1_seven	UNS	H05
1819	Sample_92	12	23	0.0306667	8.14739	8.11484	1.2681	Sample_92	AI_export_Plate 1 UNS LN_H5_H05_CD8p_CD8_live.fcs	RKq17_aIL10+aPD1_7_UNS	aIL10+aPD1	RKq17	seven	aIL10+aPD1_seven	UNS	H05
1820	Sample_92	13	2	0.00266667	NA	NA	NA	Sample_92	AI_export_Plate 1 UNS LN_H5_H05_CD8p_CD8_live.fcs	RKq17_aIL10+aPD1_7_UNS	aIL10+aPD1	RKq17	seven	aIL10+aPD1_seven	UNS	H05
1821	Sample_92	14	2	0.00266667	0.56396	0.56396	8.62169e-10	Sample_92	AI_export_Plate 1 UNS LN_H5_H05_CD8p_CD8_live.fcs	RKq17_aIL10+aPD1_7_UNS	aIL10+aPD1	RKq17	seven	aIL10+aPD1_seven	UNS	H05
1822	Sample_92	15	2	0.00266667	9.04525	9.04525	8.62169e-10	Sample_92	AI_export_Plate 1 UNS LN_H5_H05_CD8p_CD8_live.fcs	RKq17_aIL10+aPD1_7_UNS	aIL10+aPD1	RKq17	seven	aIL10+aPD1_seven	UNS	H05
1823	Sample_92	2	269	0.358667	3.97463	4.16714	2.16374	Sample_92	AI_export_Plate 1 UNS LN_H5_H05_CD8p_CD8_live.fcs	RKq17_aIL10+aPD1_7_UNS	aIL10+aPD1	RKq17	seven	aIL10+aPD1_seven	UNS	H05
1824	Sample_92	3	191	0.254667	3.72062	3.50737	2.20436	Sample_92	AI_export_Plate 1 UNS LN_H5_H05_CD8p_CD8_live.fcs	RKq17_aIL10+aPD1_7_UNS	aIL10+aPD1	RKq17	seven	aIL10+aPD1_seven	UNS	H05
1825	Sample_92	4	29	0.0386667	NA	NA	NA	Sample_92	AI_export_Plate 1 UNS LN_H5_H05_CD8p_CD8_live.fcs	RKq17_aIL10+aPD1_7_UNS	aIL10+aPD1	RKq17	seven	aIL10+aPD1_seven	UNS	H05
1826	Sample_92	5	48	0.064	18.9482	18.9708	1.31809	Sample_92	AI_export_Plate 1 UNS LN_H5_H05_CD8p_CD8_live.fcs	RKq17_aIL10+aPD1_7_UNS	aIL10+aPD1	RKq17	seven	aIL10+aPD1_seven	UNS	H05
1827	Sample_92	6	4	0.00533333	NA	NA	NA	Sample_92	AI_export_Plate 1 UNS LN_H5_H05_CD8p_CD8_live.fcs	RKq17_aIL10+aPD1_7_UNS	aIL10+aPD1	RKq17	seven	aIL10+aPD1_seven	UNS	H05
1828	Sample_92	7	5	0.00666667	19.5961	19.5961	1.92787e-09	Sample_92	AI_export_Plate 1 UNS LN_H5_H05_CD8p_CD8_live.fcs	RKq17_aIL10+aPD1_7_UNS	aIL10+aPD1	RKq17	seven	aIL10+aPD1_seven	UNS	H05
1829	Sample_92	8	57	0.076	11.3645	11.6769	1.21202	Sample_92	AI_export_Plate 1 UNS LN_H5_H05_CD8p_CD8_live.fcs	RKq17_aIL10+aPD1_7_UNS	aIL10+aPD1	RKq17	seven	aIL10+aPD1_seven	UNS	H05
1830	Sample_92	9	26	0.0346667	15.8501	15.8914	0.51735	Sample_92	AI_export_Plate 1 UNS LN_H5_H05_CD8p_CD8_live.fcs	RKq17_aIL10+aPD1_7_UNS	aIL10+aPD1	RKq17	seven	aIL10+aPD1_seven	UNS	H05
1831	Sample_93	1	124	0.165333	21.7434	22.4267	3.00915	Sample_93	AI_export_Plate 1 UNS LN_H6_H06_CD8p_CD8_live.fcs	RVc17_aIL10_7_UNS	aIL10	RVc17	seven	aIL10_seven	UNS	H06
1832	Sample_93	10	18	0.024	14.8047	15.3487	2.96109	Sample_93	AI_export_Plate 1 UNS LN_H6_H06_CD8p_CD8_live.fcs	RVc17_aIL10_7_UNS	aIL10	RVc17	seven	aIL10_seven	UNS	H06
1833	Sample_93	11	33	0.044	19.3054	19.5483	0.624553	Sample_93	AI_export_Plate 1 UNS LN_H6_H06_CD8p_CD8_live.fcs	RVc17_aIL10_7_UNS	aIL10	RVc17	seven	aIL10_seven	UNS	H06
1834	Sample_93	12	19	0.0253333	9.19093	8.40946	2.06417	Sample_93	AI_export_Plate 1 UNS LN_H6_H06_CD8p_CD8_live.fcs	RVc17_aIL10_7_UNS	aIL10	RVc17	seven	aIL10_seven	UNS	H06
1835	Sample_93	13	9	0.012	NA	NA	NA	Sample_93	AI_export_Plate 1 UNS LN_H6_H06_CD8p_CD8_live.fcs	RVc17_aIL10_7_UNS	aIL10	RVc17	seven	aIL10_seven	UNS	H06
1836	Sample_93	14	0	0	NA	NA	NA	Sample_93	AI_export_Plate 1 UNS LN_H6_H06_CD8p_CD8_live.fcs	RVc17_aIL10_7_UNS	aIL10	RVc17	seven	aIL10_seven	UNS	H06
1837	Sample_93	15	1	0.00133333	NA	NA	NA	Sample_93	AI_export_Plate 1 UNS LN_H6_H06_CD8p_CD8_live.fcs	RVc17_aIL10_7_UNS	aIL10	RVc17	seven	aIL10_seven	UNS	H06
1838	Sample_93	2	137	0.182667	4.58112	4.52145	3.09657	Sample_93	AI_export_Plate 1 UNS LN_H6_H06_CD8p_CD8_live.fcs	RVc17_aIL10_7_UNS	aIL10	RVc17	seven	aIL10_seven	UNS	H06
1839	Sample_93	3	109	0.145333	3.72039	3.54488	2.68205	Sample_93	AI_export_Plate 1 UNS LN_H6_H06_CD8p_CD8_live.fcs	RVc17_aIL10_7_UNS	aIL10	RVc17	seven	aIL10_seven	UNS	H06
1840	Sample_93	4	81	0.108	NA	NA	NA	Sample_93	AI_export_Plate 1 UNS LN_H6_H06_CD8p_CD8_live.fcs	RVc17_aIL10_7_UNS	aIL10	RVc17	seven	aIL10_seven	UNS	H06
1841	Sample_93	5	61	0.0813333	18.6202	18.8457	1.82864	Sample_93	AI_export_Plate 1 UNS LN_H6_H06_CD8p_CD8_live.fcs	RVc17_aIL10_7_UNS	aIL10	RVc17	seven	aIL10_seven	UNS	H06
1842	Sample_93	6	44	0.0586667	NA	NA	NA	Sample_93	AI_export_Plate 1 UNS LN_H6_H06_CD8p_CD8_live.fcs	RVc17_aIL10_7_UNS	aIL10	RVc17	seven	aIL10_seven	UNS	H06
1843	Sample_93	7	26	0.0346667	19.5107	19.5961	0.15302	Sample_93	AI_export_Plate 1 UNS LN_H6_H06_CD8p_CD8_live.fcs	RVc17_aIL10_7_UNS	aIL10	RVc17	seven	aIL10_seven	UNS	H06
1844	Sample_93	8	67	0.0893333	12.1931	11.9985	2.72781	Sample_93	AI_export_Plate 1 UNS LN_H6_H06_CD8p_CD8_live.fcs	RVc17_aIL10_7_UNS	aIL10	RVc17	seven	aIL10_seven	UNS	H06
1845	Sample_93	9	21	0.028	16.0666	15.8929	2.21161	Sample_93	AI_export_Plate 1 UNS LN_H6_H06_CD8p_CD8_live.fcs	RVc17_aIL10_7_UNS	aIL10	RVc17	seven	aIL10_seven	UNS	H06
1846	Sample_94	1	105	0.14	21.4185	21.6213	2.70459	Sample_94	AI_export_Plate 1 UNS LN_H7_H07_CD8p_CD8_live.fcs	RZg17_Control_7_UNS	Control	RZg17	seven	Control_seven	UNS	H07
1847	Sample_94	10	23	0.0306667	15.8893	15.8951	1.90434	Sample_94	AI_export_Plate 1 UNS LN_H7_H07_CD8p_CD8_live.fcs	RZg17_Control_7_UNS	Control	RZg17	seven	Control_seven	UNS	H07
1848	Sample_94	11	30	0.04	18.7899	19.5483	2.60775	Sample_94	AI_export_Plate 1 UNS LN_H7_H07_CD8p_CD8_live.fcs	RZg17_Control_7_UNS	Control	RZg17	seven	Control_seven	UNS	H07
1849	Sample_94	12	4	0.00533333	8.0916	8.31232	1.04987	Sample_94	AI_export_Plate 1 UNS LN_H7_H07_CD8p_CD8_live.fcs	RZg17_Control_7_UNS	Control	RZg17	seven	Control_seven	UNS	H07
1850	Sample_94	13	9	0.012	NA	NA	NA	Sample_94	AI_export_Plate 1 UNS LN_H7_H07_CD8p_CD8_live.fcs	RZg17_Control_7_UNS	Control	RZg17	seven	Control_seven	UNS	H07
1851	Sample_94	14	1	0.00133333	NA	NA	NA	Sample_94	AI_export_Plate 1 UNS LN_H7_H07_CD8p_CD8_live.fcs	RZg17_Control_7_UNS	Control	RZg17	seven	Control_seven	UNS	H07
1852	Sample_94	15	2	0.00266667	NA	NA	NA	Sample_94	AI_export_Plate 1 UNS LN_H7_H07_CD8p_CD8_live.fcs	RZg17_Control_7_UNS	Control	RZg17	seven	Control_seven	UNS	H07
1853	Sample_94	2	153	0.204	4.48645	4.52145	2.27886	Sample_94	AI_export_Plate 1 UNS LN_H7_H07_CD8p_CD8_live.fcs	RZg17_Control_7_UNS	Control	RZg17	seven	Control_seven	UNS	H07
1854	Sample_94	3	127	0.169333	4.2501	3.47701	3.57268	Sample_94	AI_export_Plate 1 UNS LN_H7_H07_CD8p_CD8_live.fcs	RZg17_Control_7_UNS	Control	RZg17	seven	Control_seven	UNS	H07
1855	Sample_94	4	59	0.0786667	NA	NA	NA	Sample_94	AI_export_Plate 1 UNS LN_H7_H07_CD8p_CD8_live.fcs	RZg17_Control_7_UNS	Control	RZg17	seven	Control_seven	UNS	H07
1856	Sample_94	5	89	0.118667	18.7411	18.8724	0.889594	Sample_94	AI_export_Plate 1 UNS LN_H7_H07_CD8p_CD8_live.fcs	RZg17_Control_7_UNS	Control	RZg17	seven	Control_seven	UNS	H07
1857	Sample_94	6	23	0.0306667	NA	NA	NA	Sample_94	AI_export_Plate 1 UNS LN_H7_H07_CD8p_CD8_live.fcs	RZg17_Control_7_UNS	Control	RZg17	seven	Control_seven	UNS	H07
1858	Sample_94	7	21	0.028	19.3999	19.5494	0.362983	Sample_94	AI_export_Plate 1 UNS LN_H7_H07_CD8p_CD8_live.fcs	RZg17_Control_7_UNS	Control	RZg17	seven	Control_seven	UNS	H07
1859	Sample_94	8	62	0.0826667	12.5822	12.6581	1.99454	Sample_94	AI_export_Plate 1 UNS LN_H7_H07_CD8p_CD8_live.fcs	RZg17_Control_7_UNS	Control	RZg17	seven	Control_seven	UNS	H07
1860	Sample_94	9	42	0.056	16.3945	15.8914	1.71059	Sample_94	AI_export_Plate 1 UNS LN_H7_H07_CD8p_CD8_live.fcs	RZg17_Control_7_UNS	Control	RZg17	seven	Control_seven	UNS	H07
1861	Sample_95	1	109	0.145333	21.9035	22.127	2.50622	Sample_95	AI_export_Plate 1 UNS LN_H8_H08_CD8p_CD8_live.fcs	34920_aIL10_7_UNS	aIL10	34920	seven	aIL10_seven	UNS	H08
1862	Sample_95	10	17	0.0226667	14.0509	15.5342	3.34911	Sample_95	AI_export_Plate 1 UNS LN_H8_H08_CD8p_CD8_live.fcs	34920_aIL10_7_UNS	aIL10	34920	seven	aIL10_seven	UNS	H08
1863	Sample_95	11	31	0.0413333	18.2959	19.5483	4.00031	Sample_95	AI_export_Plate 1 UNS LN_H8_H08_CD8p_CD8_live.fcs	34920_aIL10_7_UNS	aIL10	34920	seven	aIL10_seven	UNS	H08
1864	Sample_95	12	7	0.00933333	8.42385	8.26098	0.70451	Sample_95	AI_export_Plate 1 UNS LN_H8_H08_CD8p_CD8_live.fcs	34920_aIL10_7_UNS	aIL10	34920	seven	aIL10_seven	UNS	H08
1865	Sample_95	13	6	0.008	NA	NA	NA	Sample_95	AI_export_Plate 1 UNS LN_H8_H08_CD8p_CD8_live.fcs	34920_aIL10_7_UNS	aIL10	34920	seven	aIL10_seven	UNS	H08
1866	Sample_95	14	0	0	NA	NA	NA	Sample_95	AI_export_Plate 1 UNS LN_H8_H08_CD8p_CD8_live.fcs	34920_aIL10_7_UNS	aIL10	34920	seven	aIL10_seven	UNS	H08
1867	Sample_95	15	0	0	NA	NA	NA	Sample_95	AI_export_Plate 1 UNS LN_H8_H08_CD8p_CD8_live.fcs	34920_aIL10_7_UNS	aIL10	34920	seven	aIL10_seven	UNS	H08
1868	Sample_95	2	218	0.290667	3.93641	4.3145	2.01225	Sample_95	AI_export_Plate 1 UNS LN_H8_H08_CD8p_CD8_live.fcs	34920_aIL10_7_UNS	aIL10	34920	seven	aIL10_seven	UNS	H08
1869	Sample_95	3	157	0.209333	3.56208	3.35704	1.97044	Sample_95	AI_export_Plate 1 UNS LN_H8_H08_CD8p_CD8_live.fcs	34920_aIL10_7_UNS	aIL10	34920	seven	aIL10_seven	UNS	H08
1870	Sample_95	4	37	0.0493333	18.9397	18.9397	NA	Sample_95	AI_export_Plate 1 UNS LN_H8_H08_CD8p_CD8_live.fcs	34920_aIL10_7_UNS	aIL10	34920	seven	aIL10_seven	UNS	H08
1871	Sample_95	5	73	0.0973333	18.8039	19.2006	2.14084	Sample_95	AI_export_Plate 1 UNS LN_H8_H08_CD8p_CD8_live.fcs	34920_aIL10_7_UNS	aIL10	34920	seven	aIL10_seven	UNS	H08
1872	Sample_95	6	12	0.016	19.3362	19.3362	NA	Sample_95	AI_export_Plate 1 UNS LN_H8_H08_CD8p_CD8_live.fcs	34920_aIL10_7_UNS	aIL10	34920	seven	aIL10_seven	UNS	H08
1873	Sample_95	7	19	0.0253333	19.5076	19.5961	0.203178	Sample_95	AI_export_Plate 1 UNS LN_H8_H08_CD8p_CD8_live.fcs	34920_aIL10_7_UNS	aIL10	34920	seven	aIL10_seven	UNS	H08
1874	Sample_95	8	41	0.0546667	12.4062	12.3248	2.68247	Sample_95	AI_export_Plate 1 UNS LN_H8_H08_CD8p_CD8_live.fcs	34920_aIL10_7_UNS	aIL10	34920	seven	aIL10_seven	UNS	H08
1875	Sample_95	9	23	0.0306667	15.5572	15.8914	0.785804	Sample_95	AI_export_Plate 1 UNS LN_H8_H08_CD8p_CD8_live.fcs	34920_aIL10_7_UNS	aIL10	34920	seven	aIL10_seven	UNS	H08
1876	Sample_97	1	124	0.165333	21.7983	22.2269	3.00703	Sample_97	AI_export_Plate 2 UNS LN_A1_A01_CD8p_CD8_live.fcs	REu17_Control_12_UNS	Control	REu17	twelve	Control_twelve	UNS	A01
1877	Sample_97	10	10	0.0133333	12.5462	9.91161	4.01279	Sample_97	AI_export_Plate 2 UNS LN_A1_A01_CD8p_CD8_live.fcs	REu17_Control_12_UNS	Control	REu17	twelve	Control_twelve	UNS	A01
1878	Sample_97	11	8	0.0106667	19.5483	19.5483	2.98664e-09	Sample_97	AI_export_Plate 2 UNS LN_A1_A01_CD8p_CD8_live.fcs	REu17_Control_12_UNS	Control	REu17	twelve	Control_twelve	UNS	A01
1879	Sample_97	12	4	0.00533333	9.52567	9.55388	0.981162	Sample_97	AI_export_Plate 2 UNS LN_A1_A01_CD8p_CD8_live.fcs	REu17_Control_12_UNS	Control	REu17	twelve	Control_twelve	UNS	A01
1880	Sample_97	13	0	0	NA	NA	NA	Sample_97	AI_export_Plate 2 UNS LN_A1_A01_CD8p_CD8_live.fcs	REu17_Control_12_UNS	Control	REu17	twelve	Control_twelve	UNS	A01
1881	Sample_97	14	3	0.004	0.56396	0.56396	8.62169e-10	Sample_97	AI_export_Plate 2 UNS LN_A1_A01_CD8p_CD8_live.fcs	REu17_Control_12_UNS	Control	REu17	twelve	Control_twelve	UNS	A01
1882	Sample_97	15	1	0.00133333	9.34254	9.34254	NA	Sample_97	AI_export_Plate 2 UNS LN_A1_A01_CD8p_CD8_live.fcs	REu17_Control_12_UNS	Control	REu17	twelve	Control_twelve	UNS	A01
1883	Sample_97	2	295	0.393333	4.68923	4.71621	2.80311	Sample_97	AI_export_Plate 2 UNS LN_A1_A01_CD8p_CD8_live.fcs	REu17_Control_12_UNS	Control	REu17	twelve	Control_twelve	UNS	A01
1884	Sample_97	3	194	0.258667	4.03901	3.66676	2.93786	Sample_97	AI_export_Plate 2 UNS LN_A1_A01_CD8p_CD8_live.fcs	REu17_Control_12_UNS	Control	REu17	twelve	Control_twelve	UNS	A01
1885	Sample_97	4	32	0.0426667	21.4267	21.4267	4.30994	Sample_97	AI_export_Plate 2 UNS LN_A1_A01_CD8p_CD8_live.fcs	REu17_Control_12_UNS	Control	REu17	twelve	Control_twelve	UNS	A01
1886	Sample_97	5	51	0.068	18.1809	18.4516	1.29373	Sample_97	AI_export_Plate 2 UNS LN_A1_A01_CD8p_CD8_live.fcs	REu17_Control_12_UNS	Control	REu17	twelve	Control_twelve	UNS	A01
1887	Sample_97	6	6	0.008	NA	NA	NA	Sample_97	AI_export_Plate 2 UNS LN_A1_A01_CD8p_CD8_live.fcs	REu17_Control_12_UNS	Control	REu17	twelve	Control_twelve	UNS	A01
1888	Sample_97	7	8	0.0106667	19.5396	19.5961	0.187597	Sample_97	AI_export_Plate 2 UNS LN_A1_A01_CD8p_CD8_live.fcs	REu17_Control_12_UNS	Control	REu17	twelve	Control_twelve	UNS	A01
1889	Sample_97	8	7	0.00933333	11.6647	11.9429	1.0639	Sample_97	AI_export_Plate 2 UNS LN_A1_A01_CD8p_CD8_live.fcs	REu17_Control_12_UNS	Control	REu17	twelve	Control_twelve	UNS	A01
1890	Sample_97	9	7	0.00933333	16.3147	16.4657	0.516875	Sample_97	AI_export_Plate 2 UNS LN_A1_A01_CD8p_CD8_live.fcs	REu17_Control_12_UNS	Control	REu17	twelve	Control_twelve	UNS	A01
1891	Sample_98	1	90	0.12	21.9153	22.8814	3.46539	Sample_98	AI_export_Plate 2 UNS LN_A10_A10_CD8p_CD8_live.fcs	RBf17_aIL10+aPD1_21_UNS	aIL10+aPD1	RBf17	twenty_one	aIL10+aPD1_twenty_one	UNS	A10
1892	Sample_98	10	22	0.0293333	14.9934	15.734	2.36602	Sample_98	AI_export_Plate 2 UNS LN_A10_A10_CD8p_CD8_live.fcs	RBf17_aIL10+aPD1_21_UNS	aIL10+aPD1	RBf17	twenty_one	aIL10+aPD1_twenty_one	UNS	A10
1893	Sample_98	11	10	0.0133333	19.1989	19.4125	0.511765	Sample_98	AI_export_Plate 2 UNS LN_A10_A10_CD8p_CD8_live.fcs	RBf17_aIL10+aPD1_21_UNS	aIL10+aPD1	RBf17	twenty_one	aIL10+aPD1_twenty_one	UNS	A10
1894	Sample_98	12	11	0.0146667	8.66122	8.55583	0.441425	Sample_98	AI_export_Plate 2 UNS LN_A10_A10_CD8p_CD8_live.fcs	RBf17_aIL10+aPD1_21_UNS	aIL10+aPD1	RBf17	twenty_one	aIL10+aPD1_twenty_one	UNS	A10
1895	Sample_98	13	12	0.016	NA	NA	NA	Sample_98	AI_export_Plate 2 UNS LN_A10_A10_CD8p_CD8_live.fcs	RBf17_aIL10+aPD1_21_UNS	aIL10+aPD1	RBf17	twenty_one	aIL10+aPD1_twenty_one	UNS	A10
1896	Sample_98	14	1	0.00133333	0.56396	0.56396	NA	Sample_98	AI_export_Plate 2 UNS LN_A10_A10_CD8p_CD8_live.fcs	RBf17_aIL10+aPD1_21_UNS	aIL10+aPD1	RBf17	twenty_one	aIL10+aPD1_twenty_one	UNS	A10
1897	Sample_98	15	1	0.00133333	13.6098	13.6098	NA	Sample_98	AI_export_Plate 2 UNS LN_A10_A10_CD8p_CD8_live.fcs	RBf17_aIL10+aPD1_21_UNS	aIL10+aPD1	RBf17	twenty_one	aIL10+aPD1_twenty_one	UNS	A10
1898	Sample_98	2	200	0.266667	4.5382	4.70272	2.36054	Sample_98	AI_export_Plate 2 UNS LN_A10_A10_CD8p_CD8_live.fcs	RBf17_aIL10+aPD1_21_UNS	aIL10+aPD1	RBf17	twenty_one	aIL10+aPD1_twenty_one	UNS	A10
1899	Sample_98	3	117	0.156	3.72909	3.52963	1.84934	Sample_98	AI_export_Plate 2 UNS LN_A10_A10_CD8p_CD8_live.fcs	RBf17_aIL10+aPD1_21_UNS	aIL10+aPD1	RBf17	twenty_one	aIL10+aPD1_twenty_one	UNS	A10
1900	Sample_98	4	84	0.112	NA	NA	NA	Sample_98	AI_export_Plate 2 UNS LN_A10_A10_CD8p_CD8_live.fcs	RBf17_aIL10+aPD1_21_UNS	aIL10+aPD1	RBf17	twenty_one	aIL10+aPD1_twenty_one	UNS	A10
1901	Sample_98	5	57	0.076	18.2114	19.071	2.93545	Sample_98	AI_export_Plate 2 UNS LN_A10_A10_CD8p_CD8_live.fcs	RBf17_aIL10+aPD1_21_UNS	aIL10+aPD1	RBf17	twenty_one	aIL10+aPD1_twenty_one	UNS	A10
1902	Sample_98	6	23	0.0306667	NA	NA	NA	Sample_98	AI_export_Plate 2 UNS LN_A10_A10_CD8p_CD8_live.fcs	RBf17_aIL10+aPD1_21_UNS	aIL10+aPD1	RBf17	twenty_one	aIL10+aPD1_twenty_one	UNS	A10
1903	Sample_98	7	25	0.0333333	19.4685	19.5961	0.226391	Sample_98	AI_export_Plate 2 UNS LN_A10_A10_CD8p_CD8_live.fcs	RBf17_aIL10+aPD1_21_UNS	aIL10+aPD1	RBf17	twenty_one	aIL10+aPD1_twenty_one	UNS	A10
1904	Sample_98	8	61	0.0813333	11.9296	11.7297	2.3163	Sample_98	AI_export_Plate 2 UNS LN_A10_A10_CD8p_CD8_live.fcs	RBf17_aIL10+aPD1_21_UNS	aIL10+aPD1	RBf17	twenty_one	aIL10+aPD1_twenty_one	UNS	A10
1905	Sample_98	9	36	0.048	16.5521	15.8914	2.64429	Sample_98	AI_export_Plate 2 UNS LN_A10_A10_CD8p_CD8_live.fcs	RBf17_aIL10+aPD1_21_UNS	aIL10+aPD1	RBf17	twenty_one	aIL10+aPD1_twenty_one	UNS	A10
1906	Sample_99	1	70	0.0933333	21.4872	21.685	3.02276	Sample_99	AI_export_Plate 2 UNS LN_A11_A11_CD8p_CD8_live.fcs	RBv17_aIL10+aPD1_21_UNS	aIL10+aPD1	RBv17	twenty_one	aIL10+aPD1_twenty_one	UNS	A11
1907	Sample_99	10	5	0.00666667	11.3865	9.8141	4.2584	Sample_99	AI_export_Plate 2 UNS LN_A11_A11_CD8p_CD8_live.fcs	RBv17_aIL10+aPD1_21_UNS	aIL10+aPD1	RBv17	twenty_one	aIL10+aPD1_twenty_one	UNS	A11
1908	Sample_99	11	20	0.0266667	18.5604	19.5483	4.36892	Sample_99	AI_export_Plate 2 UNS LN_A11_A11_CD8p_CD8_live.fcs	RBv17_aIL10+aPD1_21_UNS	aIL10+aPD1	RBv17	twenty_one	aIL10+aPD1_twenty_one	UNS	A11
1909	Sample_99	12	12	0.016	10.4956	8.90222	4.96174	Sample_99	AI_export_Plate 2 UNS LN_A11_A11_CD8p_CD8_live.fcs	RBv17_aIL10+aPD1_21_UNS	aIL10+aPD1	RBv17	twenty_one	aIL10+aPD1_twenty_one	UNS	A11
1910	Sample_99	13	16	0.0213333	NA	NA	NA	Sample_99	AI_export_Plate 2 UNS LN_A11_A11_CD8p_CD8_live.fcs	RBv17_aIL10+aPD1_21_UNS	aIL10+aPD1	RBv17	twenty_one	aIL10+aPD1_twenty_one	UNS	A11
1911	Sample_99	14	1	0.00133333	0.56396	0.56396	NA	Sample_99	AI_export_Plate 2 UNS LN_A11_A11_CD8p_CD8_live.fcs	RBv17_aIL10+aPD1_21_UNS	aIL10+aPD1	RBv17	twenty_one	aIL10+aPD1_twenty_one	UNS	A11
1912	Sample_99	15	0	0	NA	NA	NA	Sample_99	AI_export_Plate 2 UNS LN_A11_A11_CD8p_CD8_live.fcs	RBv17_aIL10+aPD1_21_UNS	aIL10+aPD1	RBv17	twenty_one	aIL10+aPD1_twenty_one	UNS	A11
1913	Sample_99	2	311	0.414667	4.47825	4.55797	2.49317	Sample_99	AI_export_Plate 2 UNS LN_A11_A11_CD8p_CD8_live.fcs	RBv17_aIL10+aPD1_21_UNS	aIL10+aPD1	RBv17	twenty_one	aIL10+aPD1_twenty_one	UNS	A11
1914	Sample_99	3	116	0.154667	4.27949	3.51068	3.94857	Sample_99	AI_export_Plate 2 UNS LN_A11_A11_CD8p_CD8_live.fcs	RBv17_aIL10+aPD1_21_UNS	aIL10+aPD1	RBv17	twenty_one	aIL10+aPD1_twenty_one	UNS	A11
1915	Sample_99	4	51	0.068	NA	NA	NA	Sample_99	AI_export_Plate 2 UNS LN_A11_A11_CD8p_CD8_live.fcs	RBv17_aIL10+aPD1_21_UNS	aIL10+aPD1	RBv17	twenty_one	aIL10+aPD1_twenty_one	UNS	A11
1916	Sample_99	5	73	0.0973333	18.7197	19.024	1.70154	Sample_99	AI_export_Plate 2 UNS LN_A11_A11_CD8p_CD8_live.fcs	RBv17_aIL10+aPD1_21_UNS	aIL10+aPD1	RBv17	twenty_one	aIL10+aPD1_twenty_one	UNS	A11
1917	Sample_99	6	34	0.0453333	NA	NA	NA	Sample_99	AI_export_Plate 2 UNS LN_A11_A11_CD8p_CD8_live.fcs	RBv17_aIL10+aPD1_21_UNS	aIL10+aPD1	RBv17	twenty_one	aIL10+aPD1_twenty_one	UNS	A11
1918	Sample_99	7	9	0.012	19.6551	19.5961	0.238347	Sample_99	AI_export_Plate 2 UNS LN_A11_A11_CD8p_CD8_live.fcs	RBv17_aIL10+aPD1_21_UNS	aIL10+aPD1	RBv17	twenty_one	aIL10+aPD1_twenty_one	UNS	A11
1919	Sample_99	8	25	0.0333333	13.219	11.814	4.19054	Sample_99	AI_export_Plate 2 UNS LN_A11_A11_CD8p_CD8_live.fcs	RBv17_aIL10+aPD1_21_UNS	aIL10+aPD1	RBv17	twenty_one	aIL10+aPD1_twenty_one	UNS	A11
1920	Sample_99	9	7	0.00933333	16.2144	16.2839	0.87268	Sample_99	AI_export_Plate 2 UNS LN_A11_A11_CD8p_CD8_live.fcs	RBv17_aIL10+aPD1_21_UNS	aIL10+aPD1	RBv17	twenty_one	aIL10+aPD1_twenty_one	UNS	A11

## Sheet: Stats
	louvain	Week Post-TX	.y.	group1	group2	n1	n2	statistic	p	p.adj	p.adj.signif
33	15	seven	relative_frequency	aIL10+aPD1	Control	9	8	60	0.019	0.039	*
9	15	minus_one	relative_frequency	aIL10+aPD1	Control	10	8	64.5	0.02	0.041	*
90	5	twelve	relative_frequency	aIL10+aPD1	aIL10	7	8	7.5	0.02	0.041	*
54	2	thirty_six	relative_frequency	aIL10+aPD1	aIL10	9	9	66	0.024	0.049	*
56	12	thirty_six	relative_frequency	aIL10+aPD1	aIL10	9	9	66	0.026	0.053	ns
94	7	twelve	relative_frequency	aIL10+aPD1	aIL10	7	8	47.5	0.026	0.053	ns
66	5	thirty_six	relative_frequency	aIL10+aPD1	aIL10	9	9	65.5	0.03	0.061	ns
89	5	twelve	relative_frequency	aIL10+aPD1	Control	7	7	10	0.073	0.073	ns
55	12	thirty_six	relative_frequency	aIL10+aPD1	Control	9	8	54.5	0.082	0.082	ns
93	7	twelve	relative_frequency	aIL10+aPD1	Control	7	7	38	0.095	0.095	ns
45	7	seven	relative_frequency	aIL10+aPD1	Control	9	8	18.5	0.101	0.11	ns
46	7	seven	relative_frequency	aIL10+aPD1	aIL10	9	8	19	0.11	0.11	ns
58	15	thirty_six	relative_frequency	aIL10+aPD1	aIL10	9	9	61.5	0.062	0.123	ns
103	12	twenty_one	relative_frequency	aIL10+aPD1	Control	10	8	61.5	0.061	0.123	ns
109	10	twenty_one	relative_frequency	aIL10+aPD1	Control	10	8	22.5	0.131	0.131	ns
110	10	twenty_one	relative_frequency	aIL10+aPD1	aIL10	10	9	25	0.11	0.131	ns
87	9	twelve	relative_frequency	aIL10+aPD1	Control	7	7	10	0.073	0.147	ns
95	1	twelve	relative_frequency	aIL10+aPD1	Control	7	7	13	0.165	0.165	ns
96	1	twelve	relative_frequency	aIL10+aPD1	aIL10	7	8	15	0.152	0.165	ns
43	11	seven	relative_frequency	aIL10+aPD1	Control	9	8	18.5	0.101	0.202	ns
115	11	twenty_one	relative_frequency	aIL10+aPD1	Control	10	8	23.5	0.155	0.205	ns
116	11	twenty_one	relative_frequency	aIL10+aPD1	aIL10	10	9	29	0.205	0.205	ns
62	10	thirty_six	relative_frequency	aIL10+aPD1	aIL10	9	9	22	0.111	0.222	ns
29	2	seven	relative_frequency	aIL10+aPD1	Control	9	8	53	0.114	0.228	ns
53	2	thirty_six	relative_frequency	aIL10+aPD1	Control	9	8	49	0.236	0.236	ns
88	9	twelve	relative_frequency	aIL10+aPD1	aIL10	7	8	17.5	0.247	0.247	ns
16	9	minus_one	relative_frequency	aIL10+aPD1	aIL10	10	10	29.5	0.13	0.26	ns
61	10	thirty_six	relative_frequency	aIL10+aPD1	Control	9	8	24	0.268	0.268	ns
104	12	twenty_one	relative_frequency	aIL10+aPD1	aIL10	10	9	59	0.269	0.269	ns
49	14	thirty_six	relative_frequency	aIL10+aPD1	Control	9	8	49.5	0.171	0.342	ns
44	11	seven	relative_frequency	aIL10+aPD1	aIL10	9	8	26	0.36	0.36	ns
50	14	thirty_six	relative_frequency	aIL10+aPD1	aIL10	9	9	30	0.36	0.36	ns
65	5	thirty_six	relative_frequency	aIL10+aPD1	Control	9	8	46	0.36	0.36	ns
105	15	twenty_one	relative_frequency	aIL10+aPD1	Control	10	8	25.5	0.182	0.364	ns
15	9	minus_one	relative_frequency	aIL10+aPD1	Control	10	8	29.5	0.374	0.374	ns
25	14	seven	relative_frequency	aIL10+aPD1	Control	9	8	28	0.39	0.39	ns
26	14	seven	relative_frequency	aIL10+aPD1	aIL10	9	8	26	0.282	0.39	ns
34	15	seven	relative_frequency	aIL10+aPD1	aIL10	9	8	45	0.395	0.395	ns
63	9	thirty_six	relative_frequency	aIL10+aPD1	Control	9	8	27	0.412	0.412	ns
64	9	thirty_six	relative_frequency	aIL10+aPD1	aIL10	9	9	29	0.331	0.412	ns
5	2	minus_one	relative_frequency	aIL10+aPD1	Control	10	8	54	0.23	0.46	ns
19	11	minus_one	relative_frequency	aIL10+aPD1	Control	10	8	31.5	0.477	0.477	ns
20	11	minus_one	relative_frequency	aIL10+aPD1	aIL10	10	10	37	0.344	0.477	ns
39	9	seven	relative_frequency	aIL10+aPD1	Control	9	8	23.5	0.248	0.496	ns
111	9	twenty_one	relative_frequency	aIL10+aPD1	Control	10	8	32	0.504	0.504	ns
112	9	twenty_one	relative_frequency	aIL10+aPD1	aIL10	10	9	54	0.487	0.504	ns
107	8	twenty_one	relative_frequency	aIL10+aPD1	Control	10	8	50.5	0.374	0.54	ns
108	8	twenty_one	relative_frequency	aIL10+aPD1	aIL10	10	9	53	0.54	0.54	ns
98	14	twenty_one	relative_frequency	aIL10+aPD1	aIL10	10	9	57.5	0.28	0.56	ns
51	3	thirty_six	relative_frequency	aIL10+aPD1	Control	9	8	46	0.37	0.566	ns
52	3	thirty_six	relative_frequency	aIL10+aPD1	aIL10	9	9	47.5	0.566	0.566	ns
23	1	minus_one	relative_frequency	aIL10+aPD1	Control	10	8	32	0.515	0.579	ns
24	1	minus_one	relative_frequency	aIL10+aPD1	aIL10	10	10	58	0.579	0.579	ns
71	1	thirty_six	relative_frequency	aIL10+aPD1	Control	9	8	30	0.596	0.596	ns
72	1	thirty_six	relative_frequency	aIL10+aPD1	aIL10	9	9	51	0.377	0.596	ns
22	7	minus_one	relative_frequency	aIL10+aPD1	aIL10	10	10	36	0.306	0.612	ns
92	11	twelve	relative_frequency	aIL10+aPD1	aIL10	7	8	19	0.323	0.646	ns
101	2	twenty_one	relative_frequency	aIL10+aPD1	Control	10	8	46.5	0.594	0.653	ns
102	2	twenty_one	relative_frequency	aIL10+aPD1	aIL10	10	9	51	0.653	0.653	ns
3	3	minus_one	relative_frequency	aIL10+aPD1	Control	10	8	46.5	0.594	0.677	ns
4	3	minus_one	relative_frequency	aIL10+aPD1	aIL10	10	10	56	0.677	0.677	ns
14	10	minus_one	relative_frequency	aIL10+aPD1	aIL10	10	10	37	0.341	0.682	ns
99	3	twenty_one	relative_frequency	aIL10+aPD1	Control	10	8	50	0.398	0.683	ns
100	3	twenty_one	relative_frequency	aIL10+aPD1	aIL10	10	9	50.5	0.683	0.683	ns
117	7	twenty_one	relative_frequency	aIL10+aPD1	Control	10	8	29	0.348	0.696	ns
91	11	twelve	relative_frequency	aIL10+aPD1	Control	7	7	21	0.701	0.701	ns
6	2	minus_one	relative_frequency	aIL10+aPD1	aIL10	10	10	55	0.734	0.734	ns
40	9	seven	relative_frequency	aIL10+aPD1	aIL10	9	8	40	0.736	0.736	ns
17	5	minus_one	relative_frequency	aIL10+aPD1	Control	10	8	35	0.696	0.739	ns
18	5	minus_one	relative_frequency	aIL10+aPD1	aIL10	10	10	45	0.739	0.739	ns
118	7	twenty_one	relative_frequency	aIL10+aPD1	aIL10	10	9	40.5	0.742	0.742	ns
75	3	twelve	relative_frequency	aIL10+aPD1	Control	7	7	32	0.383	0.766	ns
76	3	twelve	relative_frequency	aIL10+aPD1	aIL10	7	8	31	0.779	0.779	ns
119	1	twenty_one	relative_frequency	aIL10+aPD1	Control	10	8	31	0.46	0.78	ns
120	1	twenty_one	relative_frequency	aIL10+aPD1	aIL10	10	9	49	0.78	0.78	ns
7	12	minus_one	relative_frequency	aIL10+aPD1	Control	10	8	49	0.449	0.788	ns
8	12	minus_one	relative_frequency	aIL10+aPD1	aIL10	10	10	46	0.788	0.788	ns
35	8	seven	relative_frequency	aIL10+aPD1	Control	9	8	27	0.413	0.826	ns
73	14	twelve	relative_frequency	aIL10+aPD1	Control	7	7	26.5	0.838	0.838	ns
74	14	twelve	relative_frequency	aIL10+aPD1	aIL10	7	8	31	0.757	0.838	ns
59	8	thirty_six	relative_frequency	aIL10+aPD1	Control	9	8	38.5	0.847	0.847	ns
60	8	thirty_six	relative_frequency	aIL10+aPD1	aIL10	9	9	47	0.596	0.847	ns
79	12	twelve	relative_frequency	aIL10+aPD1	Control	7	7	22.5	0.848	0.848	ns
80	12	twelve	relative_frequency	aIL10+aPD1	aIL10	7	8	35	0.447	0.848	ns
31	12	seven	relative_frequency	aIL10+aPD1	Control	9	8	44.5	0.439	0.878	ns
13	10	minus_one	relative_frequency	aIL10+aPD1	Control	10	8	38	0.894	0.894	ns
21	7	minus_one	relative_frequency	aIL10+aPD1	Control	10	8	38	0.894	0.894	ns
106	15	twenty_one	relative_frequency	aIL10+aPD1	aIL10	10	9	47	0.898	0.898	ns
83	8	twelve	relative_frequency	aIL10+aPD1	Control	7	7	21	0.71	0.908	ns
84	8	twelve	relative_frequency	aIL10+aPD1	aIL10	7	8	26.5	0.908	0.908	ns
85	10	twelve	relative_frequency	aIL10+aPD1	Control	7	7	22	0.797	0.908	ns
86	10	twelve	relative_frequency	aIL10+aPD1	aIL10	7	8	29.5	0.908	0.908	ns
36	8	seven	relative_frequency	aIL10+aPD1	aIL10	9	8	34.5	0.923	0.923	ns
67	11	thirty_six	relative_frequency	aIL10+aPD1	Control	9	8	32.5	0.772	0.929	ns
68	11	thirty_six	relative_frequency	aIL10+aPD1	aIL10	9	9	42	0.929	0.929	ns
113	5	twenty_one	relative_frequency	aIL10+aPD1	Control	10	8	38.5	0.929	0.929	ns
114	5	twenty_one	relative_frequency	aIL10+aPD1	aIL10	10	9	53	0.549	0.929	ns
77	2	twelve	relative_frequency	aIL10+aPD1	Control	7	7	23.5	0.949	0.949	ns
78	2	twelve	relative_frequency	aIL10+aPD1	aIL10	7	8	24	0.694	0.949	ns
2	14	minus_one	relative_frequency	aIL10+aPD1	aIL10	10	10	59	0.476	0.952	ns
1	14	minus_one	relative_frequency	aIL10+aPD1	Control	10	8	41	0.962	0.962	ns
32	12	seven	relative_frequency	aIL10+aPD1	aIL10	9	8	35	0.962	0.962	ns
37	10	seven	relative_frequency	aIL10+aPD1	Control	9	8	33	0.809	0.962	ns
38	10	seven	relative_frequency	aIL10+aPD1	aIL10	9	8	35	0.962	0.962	ns
47	1	seven	relative_frequency	aIL10+aPD1	Control	9	8	37	0.962	0.962	ns
48	1	seven	relative_frequency	aIL10+aPD1	aIL10	9	8	34.5	0.923	0.962	ns
97	14	twenty_one	relative_frequency	aIL10+aPD1	Control	10	8	39	0.962	0.962	ns
27	3	seven	relative_frequency	aIL10+aPD1	Control	9	8	35	0.963	0.963	ns
28	3	seven	relative_frequency	aIL10+aPD1	aIL10	9	8	32	0.743	0.963	ns
10	15	minus_one	relative_frequency	aIL10+aPD1	aIL10	10	10	49.5	1	1	ns
11	8	minus_one	relative_frequency	aIL10+aPD1	Control	10	8	40	1	1	ns
12	8	minus_one	relative_frequency	aIL10+aPD1	aIL10	10	10	50	1	1	ns
30	2	seven	relative_frequency	aIL10+aPD1	aIL10	9	8	36.5	1	1	ns
41	5	seven	relative_frequency	aIL10+aPD1	Control	9	8	31	0.673	1	ns
42	5	seven	relative_frequency	aIL10+aPD1	aIL10	9	8	35.5	1	1	ns
57	15	thirty_six	relative_frequency	aIL10+aPD1	Control	9	8	36	1	1	ns
69	7	thirty_six	relative_frequency	aIL10+aPD1	Control	9	8	36.5	1	1	ns
70	7	thirty_six	relative_frequency	aIL10+aPD1	aIL10	9	9	44.5	0.757	1	ns
81	15	twelve	relative_frequency	aIL10+aPD1	Control	7	7	24	1	1	ns
82	15	twelve	relative_frequency	aIL10+aPD1	aIL10	7	8	29.5	0.901	1	ns
